# Supplementary material
Source: MDPI journal article supplement (https://www.mdpi.com/2076-3417/11/1/213)
Supplement: s1 [file s1]

Archive with 6 entries (6 files):
- pathway_details.xlsx
- Detailed_Reactome pathway analysis.pdf
- Enrichr_GSE140561_human.xlsx
- genes_mouse.xlsx
- Enrichr_GSE133600_mouse.xlsx
- genes_human.xlsx
