# Supplementary material
Source: MDPI journal article supplement (https://www.mdpi.com/2076-3417/11/1/213)
Supplement: s1 [file s1 › Enrichr_GSE133600_mouse.xlsx]

## Sheet: ENCODE and ChEA Consensus TFs from ChIP-X
Term	Overlap	P-value	Adjusted P-value	Old P-value	Old Adjusted P-value	Odds Ratio	Combined Score	Genes
TCF3 CHEA	107/1006	9.62983e-30	1.0015e-27	0	0	3.4145	228.132	ZMYND8;ENO1;RBPJ;FGF4;GJA1;CCND3;TRIM28;SALL4;EPC1;FAM53B;EPC2;FNBP1;FRMD4B;ACTN4;ANK3;CDYL;SRCIN1;CD2AP;ADAM19;TBL1XR1;SLCO2A1;RAF1;RAI14;ANP32A;PDGFA;ARHGAP17;BAZ2B;NRF1;RTN4;CTIF;ATXN2;HMGXB4;EPB41L1;TSPAN9;FUT9;PDGFC;RHPN2;SRGAP3;PATZ1;PHC1;FN1;INO80;GDF3;MCC;POU2F3;PRRC2B;EXT1;AGO1;SP3;UBE2K;FGFR2;RNF220;CCNJL;TRIM71;MTMR12;HSPB8;PPP1R9A;CHD2;SPPL3;SPRED2;UBL3;NHSL1;CAPZB;SPTLC2;SNAPC3;JARID…
GATA1 CHEA	77/807	1.35503e-18	7.04617e-17	0	0	3.06309	126.024	ATF1;TENM4;ZMYND8;PRKAG2;PTPRJ;SLC2A3;CDC14A;NUDT3;IGF1R;NDST1;CCND3;CAPZB;SH3PXD2A;ZMIZ1;RPS6KA2;MYO18A;TLK1;JARID2;SPTAN1;BCAS3;KSR1;ARL15;PDE4D;DNMT3A;NSMCE2;GAB1;CDYL;TEX2;FBXO11;YWHAZ;TMEM131;ADAM19;EEF1A1;TANC1;TIAM1;KAT6A;KIT;LCOR;MYH9;ROR2;RAPGEF5;CUEDC1;MACF1;SGMS1;TSHZ2;ITPR1;TULP2;ARHGAP17;NRF1;TSPAN32;RTN4;ABLIM1;DPP6;ZDHHC19;ZMAT4;TSPAN5;PIP5K1B;ACSS1;RREB1;ASIC1;RAP1GAP2;SMAD3;CRADD…
NANOG CHEA	60/595	9.29614e-16	3.22266e-14	0	0	3.23725	112.047	SPARC;MTMR12;SLC2A3;ENO1;RBPJ;CHD2;AKAP12;SPRED2;GJA1;SALL1;SALL4;EPC1;JARID2;YWHAG;TLE4;NSF;HSP90AA1;SPATS1;SHROOM3;ACTN4;CDYL;IL17RD;ETV5;ENAH;ADAM19;TBL1XR1;KIT;LCOR;MYH9;ULK1;BCAT1;SGK1;RAI14;CDCA3;SGMS1;ANP32A;PDGFA;AKAP2;TSPAN9;FUT9;PDGFC;NCAM1;IGF2BP2;TBL1X;RHPN2;JAM2;PAK4;PHC1;ST8SIA1;PCDHGC4;LNPEP;GDF3;SORBS1;TBX3;EXT1;MOV10;SP2;GSTA4;FRYL;FGFR2
UBTF ENCODE	110/1631	5.59657e-15	1.45511e-13	0	0	2.16511	71.0517	AHCYL2;UBXN2A;NUDT3;IGF1R;PPP4R1;ZMIZ1;PWWP2A;PIEZO1;FAM53B;EPC2;DLEU2;PKNOX1;TLE4;MAP2K1;FNBP1;TEX2;FBXO11;SRCIN1;PIAS2;TMEM131;RAB31;KAT6B;TBL1XR1;KAT6A;ULK1;DENND6A;RAF1;KCTD18;PFKFB3;ANP32A;CUL3;KMT2C;CUL1;ITPR1;BAZ2B;IQGAP1;NRF1;TAF5L;RTN4;HMGXB4;IRAK2;TSPAN5;SCAP;PIP5K1B;PATZ1;RREB1;CDK17;EGR1;SMAD3;IDH1;LNPEP;ELL2;MANBAL;MED13L;DNMBP;STK24;MOB2;TAB2;ANP32B;CDK13;UBE2K;ZCCHC2;BMPR1A;GSK3B;S…
GATA2 CHEA	64/772	9.34145e-13	1.94302e-11	0	0	2.66137	73.7176	TENM4;ZMYND8;CDC14A;IGF1R;SEPT9;CCND3;LASP1;SH3PXD2A;ZMIZ1;RPS6KA2;MYO18A;JARID2;SPTAN1;SOX5;KSR1;STARD8;NSMCE2;ACSL6;ELOVL6;ACTN4;CDYL;TEX2;SRCIN1;EEF1A1;TANC1;TBL1XR1;B3GNT2;MYH9;RAPGEF5;MCPH1;DDC;SGMS1;AHNAK;IGSF3;ITPR1;LYZL4;TSPAN32;HMGXB4;ELMSAN1;ZMAT4;MXI1;VTI1A;TSPAN5;UBTD1;PIP5K1B;E2F3;SMYD3;CNNM2;RREB1;ASIC1;MAP4K4;CREBBP;GALNT2;UROS;C1GALT1;CDC5L;SORBS1;MAPK14;ELL2;MED13L;ARHGAP23;CCPG1…
AR CHEA	78/1095	6.25577e-12	1.08433e-10	0	0	2.28677	58.993	DGKG;MAML2;BNC2;DENND5B;WWC1;PRKAG2;ARHGAP5;IGF1R;RIMS2;AKAP12;RIMS1;CDH4;CAPZB;SH3PXD2A;ARFIP1;TNS3;PKNOX2;KDM6A;TLE4;BCAS3;EPHA4;MAP2K1;PPP1R12A;TSC22D1;NCOA3;PDE4D;GAB1;SHROOM3;ANK2;LIFR;NAV1;FRMD4B;ANK3;CDYL;CDYL2;TANC1;TIAM1;RAB31;UBE2R2;KAT6B;KATNAL2;TBL1XR1;PALLD;EXOC4;PECAM1;ROR2;TLN2;MCPH1;DDC;ANP32A;USP10;TSHZ2;BAZ2B;LYZL4;RTN4;FUT9;MGAT5B;VTI1A;SMYD3;RREB1;MPZL1;BRD4;DARS;KCNJ6;AUTS2;W…
TCF3 ENCODE	65/840	1.29555e-11	1.92482e-10	0	0	2.48414	62.2761	ATF1;HSP90AB1;MTMR12;SLC44A1;CISD2;ENO1;SMG5;NUDT3;ZMIZ1;PIEZO1;ARFIP1;EPC2;SPTAN1;ARL6IP6;TLE4;TOR3A;HSP90AA1;PPP1R12A;ARL15;DNMT3A;ETV5;CD2AP;EEF1A1;TBL1XR1;KAT6A;MALAT1;BIRC6;CUEDC1;ATF4;PAFAH1B1;ANKRD17;SGMS1;KMT2C;ANKRD11;NRF1;COX5A;STRN3;RALY;E2F3;APBB2;TBL1X;WDTC1;CDK17;SMAD2;EGR1;SMAD3;CRADD;WTAP;IQSEC1;FOXJ3;C1GALT1;SETD1A;FBXO36;EEF2;FOXN2;ELL2;PLEKHA7;EXT1;RCAN1;ZZZ3;SP3;DNAJA2;TRIP12;…
SMAD4 CHEA	50/584	1.08193e-10	1.40651e-09	0	0	2.74852	63.0706	NRP2;BNC2;TENM4;CELF1;HSPB8;PTPRJ;RBPJ;SHB;FGF1;SIPA1L2;CHD2;CDC14A;CDH4;EPB41L4A;CCND3;SH3PXD2A;RPS6KA2;EPC2;SOX5;BCAS3;KSR1;PDE4D;SHROOM3;LIFR;ARID1B;TANC1;PALLD;AGPS;RAPGEF1;ARHGEF3;ROR2;TLN2;BCAT1;SGMS1;LYZL4;CTIF;STOX2;ABLIM1;ZMAT4;PIP5K1B;SRGAP3;RREB1;TCF7L1;MCC;KLF3;PLEKHA7;TTC39B;DNMBP;ST5;FGFR2
POU5F1 CHEA	30/261	7.91338e-10	9.14435e-09	0	0	3.68997	77.3318	TENM4;CLTC;PDGFA;ENO1;AKAP2;AKAP12;GJA1;SALL1;ZMIZ1;PDGFC;MYO18A;EPC1;PATZ1;JARID2;JAM2;MAP4K4;TLE4;TGIF1;DENND2C;HSP90AA1;PHC1;EBF1;SHROOM3;CDYL;IL17RD;TMEM131;ETV5;AGO1;SGK1;FGFR2
SOX2 CHEA	57/775	1.7188e-09	1.78755e-08	0	0	2.3611	47.651	NRP2;HSP90AB1;MTMR12;GRIK3;CHD2;GJA1;UBL3;SALL1;TRIM28;SALL4;SNAPC3;EPC2;JARID2;TNS3;YWHAG;TLE4;EPHA4;KLF12;SHROOM3;ELOVL6;AP3B1;CDYL;IL17RD;ETV5;ENAH;PPM1B;TBL1XR1;KIT;ALPK3;BCAT1;ATF4;AHNAK;ANP32A;SRC;PDGFA;BAZ2B;AKAP2;EPB41L1;PDGFC;SRGAP3;JAM2;MAP4K4;KCNJ6;PHC1;FN1;FOXN3;GDF3;SORBS1;ELL2;TBX3;EXT1;MYO1E;GSTA4;AGO2;SP3;LGR4;FGFR2
NFE2L2 CHEA	68/1022	2.82504e-09	2.67094e-08	0	0	2.13599	42.0465	ATF1;PHF3;PGAP1;MAML2;MTMR12;CLTC;LAMC2;PTPRK;ARHGAP5;SIPA1L2;COIL;GJA1;UBL3;NHSL1;ZMIZ1;REV3L;XXYLT1;ERC2;YWHAG;TGIF1;KLF12;PPP1R12A;FNBP1;NSMCE2;PAWR;LIFR;NAV1;ANK3;MID1;YWHAZ;ENAH;TANC1;TBL1XR1;PAPD5;B3GNT2;MYH9;NCOA7;SGK1;RAF1;RAI14;MACF1;DDC;GLIS3;ACACB;ZMAT4;PDGFC;RICTOR;IGF2BP2;MAP4K3;YES1;SMAD3;POU2F1;AUTS2;IDH1;C1GALT1;FN1;DAB2IP;HS3ST5;ARHGAP23;EXT1;ICK;FMNL2;GSTA4;ST5;SP3;TBCE;EIF3H;BM…
SALL4 CHEA	34/355	7.14356e-09	6.19108e-08	0	0	3.07463	57.671	SLC44A1;UHRF1;ZMYND8;CLTC;CUL1;PPP1R9A;LITAF;GJA1;UBL3;SALL1;TRIM28;TSPAN9;SALL4;SH3BP4;IGF2BP2;MORC1;MAP4K4;ZSWIM3;LYPLA1;POU2F1;ANK2;ELOVL6;ANK3;FOXN2;MED13L;EXT1;TANC1;ADRB3;GSTA4;TBL1XR1;SP3;RAPGEF1;BCAT1;TNFRSF21
ZBTB7A ENCODE	114/2184	1.81418e-08	1.45135e-07	0	0	1.67569	29.8693	UBXN2A;ENO1;MSI2;RBPJ;NUDT3;IGF1R;CCND3;PPP4R1;DEPTOR;ZMIZ1;FBRSL1;PIEZO1;DLEU2;CSNK2A1;FNBP1;SRCIN1;CD2AP;EEF1A1;KAT6B;TBL1XR1;PKP4;ULK1;DENND6A;KCTD18;ATF4;RAI14;ANP32A;CUL3;KMT2C;ANKRD11;CUL1;RTN4;ATXN2;SMYD3;PATZ1;RREB1;WDTC1;CDK17;ANKRD28;EGR1;DARS;YES1;SMURF1;IDH1;DSTN;LNPEP;FOXN2;SRPK1;EXT1;ICK;MOV10;DNMBP;CCPG1;AGO2;SP3;TAB2;ANP32B;BMPR1A;HSP90AB1;CLTC;PTPRJ;SHB;CHD2;SPPL3;COIL;SPRED2;IMM…
KLF4 CHEA	60/987	5.86859e-07	4.35952e-06	0	0	1.95153	28.0015	NRP2;HSP90AB1;SLC44A1;CLTC;PTPRJ;SLC2A3;ENO1;AKAP12;LASP1;SALL1;TRIM28;ZMIZ1;SNAPC3;JARID2;YWHAG;CHST8;TGIF1;DENND2C;PPP1R12A;CSNK2A1;ARL15;NSMCE2;EBF1;PAWR;RPSA;IRAK3;YWHAZ;TMEM131;EEF1A1;TBL1XR1;B3GNT2;ROR2;MAPT;SOS1;SGK1;IFT46;ATF4;ANP32A;UHRF1;USP10;PDGFA;COX5A;EXOSC5;EPB41L1;TSPAN9;TBL1X;CTNNAL1;JAM2;PHC1;POU2F1;AGK;FN1;DSTN;LNPEP;KLF3;TBX3;GATAD2A;MOV10;QRICH1;ANP32B
RUNX1 CHEA	72/1294	1.1663e-06	8.08634e-06	0	0	1.78624	24.4031	ZMYND8;CLTC;ENO1;CHD2;SEPT9;PCM1;CCND3;SNAPC3;RPS6KA2;MYO18A;ANXA6;REV3L;EPC1;ARFIP1;JARID2;XXYLT1;TNS3;TLE4;KLF12;PPP1R12A;FNBP1;EED;PDE4D;ELOVL6;ANK2;COMMD1;TEX2;FBXO11;PIAS2;TMEM131;PALLD;PECAM1;SIK3;ARHGEF3;B3GNT2;PKP4;PIGL;CUEDC1;GRAMD1B;GGNBP2;TSPAN32;RTN4;FAM129B;ABR;ABLIM1;ELMSAN1;GNG7;RICTOR;TBL1X;CNNM2;MAP4K4;SMAD2;EGR1;HSPA8;CREBBP;SMAD3;CRADD;WTAP;CCDC57;C1GALT1;HIPK1;FOXN2;PTPN14;SET…
ESR1 CHEA	18/154	1.52971e-06	9.94314e-06	0	0	3.75227	50.2445	IGSF3;ITPR1;GRIK4;PAWR;LITAF;MED13L;NCOR2;DEPTOR;RAB31;SH3PXD2A;KAT6B;SLCO2A1;SH3BP4;E2F3;TACC1;MAPT;TOP1;TNS3
ZNF384 ENCODE	47/730	2.24352e-06	1.37251e-05	0	0	2.06689	26.885	HSP90AB1;USP10;CLTC;GRIK4;SLC2A3;NRF1;CHD2;SPRED2;ATXN2;NIPBL;SPTLC2;AP1G1;MXI1;CHEK1;EPC1;JARID2;PATZ1;MAP4K3;YWHAG;CDK17;SRRM2;CREBBP;PHC1;RNGTT;POU2F1;WTAP;ARL15;FOXJ3;C1GALT1;FBXO36;EBF1;SAMD4B;IFT80;TEX14;MEMO1;INO80;ETV5;NCOR2;CFDP1;NASP;TBL1XR1;SP3;BIRC6;TRIP12;SAE1;TNRC6A;SNTB2
PPARG CHEA	38/535	2.248e-06	1.29884e-05	0	0	2.28019	29.655	TTYH2;SGMS1;ZMYND8;PVT1;HSPB8;NRF1;SHB;SEPT9;IRAK2;MXI1;XXYLT1;PAIP2;YWHAG;WWOX;RANBP3;VWF;CRADD;CCDC57;DENND2A;DNMT3A;AP3B1;NAV1;ACTN4;FBXO11;TMEM131;FMNL2;ARPC2;TNIP1;KANSL1;TBL1XR1;SP3;RAPGEF1;PECAM1;MYH9;RAF1;EIF3A;ATF4;MCPH1
CHD1 ENCODE	42/655	8.65915e-06	4.73975e-05	0	0	2.0585	23.9957	TCERG1;LUZP1;CLTC;PTPRJ;NRF1;PDS5A;NIPBL;UBL3;ZMIZ1;EPC1;RALY;ARIH1;PKNOX1;ARL6IP6;KDM6A;SRRM2;SPEN;HSPA8;HSP90AA1;CSNK2A1;WTAP;EED;UROS;TET2;FBXO36;EBF1;HIPK1;EEF2;FBXO11;ARID1B;PNRC1;SYN1;MED13L;ARPC2;SLTM;AGO2;MYH9;BIRC6;TRIP12;PIGL;PAFAH1B1;BMPR1A
STAT3 CHEA	18/177	1.1088e-05	5.76578e-05	0	0	3.26468	37.2489	FHOD3;TRIM71;NRP2;KCNJ6;TENM4;ZMYND8;PDE4D;EBF1;GLIS3;YWHAZ;RTN4;ETV5;ABLIM1;KAT6A;DYM;UBTD1;APBB2;SNTB2
RCOR1 ENCODE	43/702	2.05652e-05	0.000101847	0	0	1.96641	21.2213	HSP90AB1;ANP32A;SLC44A1;ENO1;MSI2;CRKL;RELB;ATXN2;ZMIZ1;PWWP2A;SCAP;TBL1X;PKNOX1;PGPEP1;PATZ1;RREB1;SPTAN1;MAP4K3;PAK4;STPG1;SPEN;CREBBP;DNMT3A;FOXJ3;TET2;DSTN;LNPEP;MEMO1;FOXN2;FBXO11;ARID1B;MANBAL;CD2AP;NCOR2;SYT11;MOB2;CCDC6;MYH9;BIRC6;ULK1;ANP32B;ZCCHC2;BMPR1A
TAF1 ENCODE	142/3346	4.54594e-05	0.000214899	0	0	1.3624	13.6222	ATF1;TCERG1;ENO1;CRKL;RABGEF1;CCND3;TRIM28;CHEK1;PWWP2A;EPC1;ARL6IP6;SRRM2;MAP2K1;CSNK2A1;FNBP1;ARL15;COG5;NOSIP;RPSA;ACTN4;FBXO11;TMEM131;CD2AP;EEF1A1;KAT6B;KAT6A;MALAT1;RAF1;ATF4;ANKRD17;ANAPC15;GGNBP2;ANKRD11;ITPR1;IQGAP1;NRF1;RTN4;ATXN2;HMGXB4;VTI1A;HSPA8;POU2F1;CRADD;FBXO36;LNPEP;MEMO1;INO80;EEF2;MANBAL;SETX;EXT1;TADA2A;ZZZ3;ARPC2;SP2;NASP;SP3;TBCE;MDM4;ANP32B;CDK13;SAE1;ZCCHC2;GSK3B;HSP90AB…
PBX3 ENCODE	65/1269	5.35406e-05	0.000242097	0	0	1.64435	16.1723	TCERG1;GSK3B;HSP90AB1;HIP1;MTMR12;CHD8;CLTC;JMJD1C;ENO1;WDR45;CHD2;DCAF4;SPPL3;AP1G1;PWWP2A;PKNOX1;JARID2;ERC2;ARL6IP6;KDM6A;TLE4;STPG1;BCAS3;EPHA4;DENND2C;ARL15;COMMD1;YWHAZ;ETV5;EEF1A1;TIAM1;PPM1B;KAT6B;KATNAL2;KAT6A;MYH9;MALAT1;BIRC6;ATF4;ANAPC15;CDCA3;TSACC;ANP32A;ANKRD11;RTN4;ATXN2;ARVCF;UBTD1;TBL1X;CNNM2;MPZL1;ZSWIM3;WDTC1;SMAD2;WTAP;FOXJ3;FBXO36;SAMD4B;GATAD2B;GATAD2A;SP2;SP3;ALDH16A1;TRIP…
REST CHEA	63/1280	0.000213699	0.000926029	0	0	1.58006	13.353	DGKG;FHOD3;GRIK4;MSI2;ARHGAP35;RIMS2;CDH4;HHAT;GLT1D1;ZMIZ1;CRTAC1;EPC2;ERC2;DLGAP4;ARL6IP6;CHST8;NSF;EPHA4;BRD1;DNMT3A;DENND2A;ACSL6;ACTN4;IL17RD;QTRT1;ADRB3;TBL1XR1;EXOC4;RAPGEF1;TOP1;MAPT;SGK1;RAF1;MCPH1;CTBP2;NRF1;EXOSC5;DPP6;MGAT5B;PRDM16;IGF2BP1;SCAP;SMYD3;TRPM3;ASIC1;SMAD2;NTRK2;KCNJ6;KDM4C;CRADD;IQSEC1;ESRRB;NMNAT2;SORBS1;SORL1;KLF3;ENOX1;MED13L;TTC39B;SRPK1;MOV10;PPP2R2C;TRIP12
YY1 ENCODE	116/2753	0.000358769	0.00149248	0	0	1.35268	10.7306	ATF1;TCERG1;UBXN2A;RBPJ;CDC14A;NUDT3;CRKL;CCND3;DEPTOR;PWWP2A;EPC1;EPC2;SRRM2;CSNK2A1;COG5;IFT80;RPSA;TMEM131;EEF1A1;CFDP1;KAT6B;KAT6A;SIK3;MALAT1;RAF1;ATF4;CDCA3;NRF1;CTIF;HMGXB4;RREB1;HSPA8;CREBBP;YES1;POU2F1;CRADD;UROS;IDH1;FBXO36;LNPEP;INO80;EEF2;MED13L;RCAN1;CDK7;ZZZ3;NASP;MDM4;TAB2;ANP32B;SAE1;UBE2K;GSK3B;CELF1;CLTC;CHD2;SMG5;COIL;SPRED2;NIPBL;PCM1;UBL3;SART3;AP1G1;SNAPC3;REV3L;JARID2;XXYLT…
TP53 CHEA	22/319	0.000454693	0.00181877	0	0	2.21398	17.0386	ANKRD17;EPHA4;NTRK2;BNC2;ANKRD11;EBF1;MRPS31;PRKAG2;MSI2;FOXN3;RBPJ;CHD2;PTPN14;LASP1;TFDP1;GNG7;PDGFC;PRX;APBB2;MDM4;PGPEP1;MAP4K4
TP63 CHEA	65/1399	0.000793199	0.00305528	0	0	1.49155	10.6488	MAML2;LAMC2;ENO1;SHB;ARHGAP5;SIPA1L3;SPPL3;ARHGAP35;AKAP12;RABGEF1;SPRED2;UBL3;SH3PXD2A;FBRSL1;TLK1;PKNOX1;TLE4;ELOVL6;FRMD4B;TEX2;ARID1B;TMEM131;TRAIP;TANC1;NCOR1;TBL1XR1;LCOR;MYH9;NCOA7;TOP1;RAPGEF5;SOS1;SGK1;PTGES;PFKFB3;TSHZ2;CUL1;GLIS3;ACACB;FAM129B;STOX2;ABLIM1;MXI1;SH3BP4;TSPAN5;SCAP;E2F3;SRGAP3;RREB1;MPZL1;MAP4K3;BRD4;WDTC1;EGR1;CRADD;PCDHGC5;MEMO1;KLF3;PRRC2B;MANBAL;TADA2A;FMNL2;XPNPEP1;…
SP1 ENCODE	37/707	0.00153213	0.00569076	0	0	1.68006	10.8886	TCERG1;GSK3B;SGMS1;CDCA3;MTMR12;ANP32A;ANKRD11;CHD8;RBPJ;RTN4;SPRED2;ARVCF;IMMP2L;SPTLC2;ZMIZ1;PWWP2A;TBL1X;ZSWIM3;ARL6IP6;STPG1;WWOX;BCAS3;SETD1A;LNPEP;MEMO1;AP3B1;FBXO11;ETV5;GATAD2A;RCAN1;PPM1B;SP2;KAT6B;MYH9;MALAT1;QRICH1;FRYL
CTCF ENCODE	76/1790	0.00340832	0.0122229	0	0	1.36302	7.74405	ATF1;FHOD3;TCERG1;PCDHGB7;CELF1;GRIK4;CDC14A;IGF1R;COIL;NIPBL;EPB41L4A;DEPTOR;PIEZO1;EPC1;FAM53B;XXYLT1;YWHAG;PKNOX2;STPG1;EPHA4;MAP2K1;ARL15;DNMT3A;FBXO11;SRCIN1;NCOR2;QTRT1;PCDHGB1;MAPT;IFT46;KCTD18;TNFRSF21;ANKRD17;CEMIP;SGMS1;NRF1;PDS5A;RTN4;ABR;SCAF8;IRAK2;MGAT5B;SCAP;APBB2;PAIP2;CNNM2;PATZ1;ASIC1;CDK17;WWOX;NTRK2;EGR1;TCF7L1;POU2F1;ST8SIA1;IDH1;LIMK2;C1GALT1;SAMD4B;RAB27A;EEF2;MAPK14;ELL2;P…
MYC CHEA	30/573	0.00409218	0.0141862	0	0	1.68077	9.24202	TCERG1;HSP90AB1;TSACC;ANP32A;USP10;ARHGAP35;HSPD1;AKAP12;GJA1;FUT9;IGF2BP1;EPC1;E2F3;PATZ1;ANKRD28;HSPA8;HSP90AA1;EED;RPSA;INO80;EEF2;FOXN2;HSPE1;YWHAZ;GATAD2A;PPM1A;TFDP1;NASP;TBL1XR1;ANP32B
E2F1 CHEA	41/859	0.00460287	0.0154419	0	0	1.53226	8.24521	TRIM71;LUZP1;ANKRD11;MRPS31;MSI2;EPS8;UBL3;SART3;EPB41L1;CHEK1;E2F3;RHPN2;ARL6IP6;SOX5;TGIF1;DARS;HSP90AA1;RANBP3;ATAD5;CRADD;TPM3;EED;LIMK2;ESRRB;PAWR;CDC5L;INO80;EEF2;FOXN2;CBFA2T2;TBX3;TANC1;PPM1B;TFDP1;NASP;ST5;CCPG1;SP3;KIT;MYH9;MCM2
RELA ENCODE	25/484	0.00976919	0.0317499	0	0	1.6582	7.67501	GSK3B;HSP90AB1;WWC1;CLTC;RELB;HMGXB4;AP1G1;REV3L;EPC1;KSR1;EEF2;SORL1;GATAD2B;PNRC1;EEF1A1;AIM2;ARPC2;TNIP1;KAT6A;WAC;MYH9;MALAT1;CDK13;SAE1;PTPN2
NFIC ENCODE	16/279	0.0144547	0.0455542	0	0	1.84102	7.7999	EGR1;CDCA3;SLC44A1;CLTC;ATP2B4;LNPEP;PNRC1;STRN3;EPS8;RNF168;EEF1A1;MOV10;SPRED2;CDK7;TBL1X;CUEDC1
SMC3 ENCODE	50/1181	0.017128	0.0523914	0	0	1.35913	5.52765	FHOD3;PCDHGB7;GRIK4;PTPRJ;CDC14A;COIL;EPB41L4A;DEPTOR;ZMIZ1;PIEZO1;FAM53B;XXYLT1;STPG1;EPHA4;MAP2K1;NCOA3;DNMT3A;SRCIN1;QTRT1;TBL1XR1;ANKRD17;CEMIP;AHNAK;PDS5A;RTN4;ABR;SCAF8;MGAT5B;SCAP;TBL1X;CNNM2;PATZ1;ASIC1;WWOX;EGR1;POU2F1;LIMK2;SAMD4B;RAB27A;MEMO1;EEF2;MAPK14;ELL2;PLXDC1;POU2F3;MED13L;ZZZ3;DNMBP;AGO2;CDK13
BRCA1 ENCODE	120/3218	0.018064	0.0536759	0	0	1.19712	4.80504	TCERG1;CISD2;JMJD1C;RBPJ;CRKL;EPC1;EPC2;PKNOX1;ARL6IP6;SRRM2;TOR3A;MAP2K1;NSMCE2;IFT80;CD2AP;EEF1A1;SIK3;MALAT1;RAF1;KCTD18;ATF4;ANKRD17;ANAPC15;GGNBP2;CUL3;ANKRD11;ITPR1;NRF1;PDS5A;ABR;PATZ1;EGR1;DARS;HSPA8;SMAD3;POU2F1;UROS;FBXO36;RAB27A;LNPEP;INO80;ELL2;MOV10;ZZZ3;CCPG1;TAB2;CDK13;UBE2K;ZCCHC2;BMPR1A;GSK3B;HSP90AB1;SLC44A1;CELF1;CLTC;SIPA1L3;SPPL3;SMG5;PCM1;LASP1;UBL3;SART3;AP1G1;SNAPC3;REV3L;…
USF2 ENCODE	42/965	0.0183762	0.0530868	0	0	1.39722	5.58426	ATF1;TCERG1;AHCYL2;CUL3;CLTC;CISD2;COX5A;SPPL3;RTN4;RELB;PCM1;ANXA6;DYM;SCAP;UBTD1;DLEU2;PKNOX1;PGPEP1;RREB1;MAP4K3;KDM6A;BCAS3;NSMCE2;SLC39A11;EEF2;PIAS2;TOPORS;TMEM131;MED13L;QTRT1;RCAN1;CDK7;RAB31;CFDP1;ZZZ3;KAT6A;SIK3;DENND6A;SAE1;EIF3A;ATF4;MCM2
FOXA2 ENCODE	17/316	0.0210094	0.0590536	0	0	1.72705	6.6712	PDE4D;LNPEP;HIPK1;ETV5;MED13L;SRPK1;CCND3;DNMBP;CDC37L1;ALDH16A1;EPC2;RICTOR;TBL1X;IFT46;SOS1;UBE2K;KDM6A
FOS ENCODE	29/637	0.0272869	0.0746799	0	0	1.46151	5.26339	TCERG1;GSK3B;CDCA3;MTMR12;TSACC;ZMYND8;DCAF4;RTN4;HSPD1;SPTLC2;PWWP2A;CTNNAL1;MPZL1;ZSWIM3;STPG1;BCAS3;KDM4C;HSPE1;FBXO11;GATAD2B;ETV5;GATAD2A;PPM1B;SP2;KAT6B;SP3;MYH9;FRYL;ATF4
HNF4A ENCODE	52/1276	0.0286259	0.0763356	0	0	1.30826	4.64884	TRIM71;ALDH1L1;PGAP1;DENND5B;PTPRK;WDR45;SEPT9;LASP1;SH3PXD2A;ANXA6;PGPEP1;TNS3;ARL6IP6;DNMT3A;GAB1;ACTN4;ETV5;TFDP1;RAPGEF1;SIK3;PKP4;SOS1;IFT46;KANK4;USP10;MRPS31;TYMS;PDS5A;HSPD1;ATXN2;IGF2BP2;PATZ1;RREB1;SRSF11;MAP4K3;PAK4;WWOX;GALNT2;IDH1;FOXJ3;C1GALT1;LNPEP;HSPE1;HIPK1;FOXN2;FBXL12;RCAN1;DNAJA2;QRICH1;SLC28A1;UBE2K;EIF3A
ZMIZ1 ENCODE	39/914	0.0294891	0.0766717	0	0	1.36981	4.82685	HSP90AB1;GGNBP2;MTMR12;TSACC;SPPL3;SMG5;TSPAN32;SCAF8;ATXN2;LASP1;CDC37L1;PAIP2;PATZ1;SPTAN1;BRD4;ZSWIM3;EGR1;LYPLA1;HSP90AA1;PPP1R12A;CSNK2A1;FNBP1;ARL15;AP3B1;ARID1B;PNRC1;SRPK1;EXT1;EEF1A1;ARPC2;SLTM;KAT6A;B3GNT2;ULK1;PIGL;CDK13;PTPN2;ATF4;PAFAH1B1
ZKSCAN1 ENCODE	8/120	0.034123	0.0865558	0	0	2.14018	7.22907	ICK;CCND3;ATXN2;MTMR12;CAPZB;AGO2;TBL1X;CBFA2T2
USF1 ENCODE	56/1423	0.041878	0.103698	0	0	1.26335	4.00862	ATF1;TCERG1;AHCYL2;CLTC;CISD2;ENO1;SPPL3;PCM1;ANXA6;EPC1;DLEU2;PGPEP1;KDM6A;BCAS3;TOR3A;MAP2K1;NSMCE2;SLC39A11;PIAS2;TOPORS;TMEM131;QTRT1;RAB31;CFDP1;KAT6A;SIK3;TOP1;DENND6A;ATF4;MCM2;RAI14;SGMS1;CUL3;COX5A;TAF5L;RELB;CTIF;ATXN2;EXOSC5;DYM;UBTD1;E2F3;CNNM2;RREB1;SMAD2;KDM4C;EEF2;KLF3;MED13L;RCAN1;CDK7;ZZZ3;MOB2;ALDH16A1;SAE1;EIF3A
BHLHE40 ENCODE	17/348	0.0460235	0.111313	0	0	1.56824	4.82798	MTMR12;CLTC;CISD2;ENO1;SPPL3;PIAS2;ATXN2;KAT6A;REV3L;FAM53B;SCAP;UBTD1;DLEU2;TBL1X;SMYD3;PATZ1;SAE1
ZEB1 ENCODE	7/106	0.0478095	0.113004	0	0	2.11999	6.4459	ANKRD28;STPG1;PPM1B;AP1G1;WWC1;AP3B1;CUEDC1
PPARD CHEA	14/285	0.0633783	0.146474	0	0	1.57698	4.3503	FHOD3;MAML2;SMURF1;ITPR1;NAV1;EXT1;RCAN1;LASP1;KAT6B;KIT;MYH9;MALAT1;TNS3;TNFRSF21
CREB1 CHEA	55/1444	0.0702389	0.158801	0	0	1.22275	3.24744	TCERG1;GSK3B;HSP90AB1;CLTC;RBPJ;CHD2;CRKL;SPRED2;CCND3;UBL3;ZMIZ1;AP1G1;ARIH1;JARID2;YWHAG;TLE4;SRRM2;BCAS3;BRD1;MAP2K1;YWHAZ;EPN1;NCOR2;METTL23;EEF1A1;PPM1A;EXOC4;MYH9;TOP1;ATF4;PAFAH1B1;ANKRD17;KMT2C;ANKRD11;RELB;U2AF1L4;MXI1;CDC37L1;PAIP2;CNNM2;SRSF11;CASP8AP2;EGR1;HSPA8;CDC5L;HSPE1;EEF2;ELL2;GATAD2A;EXT1;XPNPEP1;SP2;MOB2;EIF3A;ZCCHC2
CEBPD ENCODE	30/734	0.079472	0.175853	0	0	1.3121	3.3227	GGNBP2;CUL3;KMT2C;MRPS31;ENO1;PDS5A;CHD2;STRN3;SPRED2;ELMSAN1;E2F3;WDTC1;SPEN;WTAP;ARL15;IDH1;EEF2;FBXO11;KLF3;MED13L;EEF1A1;SLTM;GSTA4;SP3;MALAT1;NCOA7;ANP32B;SOS1;EIF3A;ATF4
E2F4 ENCODE	29/710	0.0840458	0.182099	0	0	1.31124	3.24714	TCERG1;ANAPC15;CDCA3;UHRF1;TYMS;PDS5A;SART3;CHEK1;E2F3;SRSF11;ARL6IP6;CASP8AP2;HSPA8;RANBP3;POU2F1;ATAD5;WTAP;EED;IFT80;TEX14;FOXN2;TRAIP;RNF168;PPM1B;TFDP1;NASP;ALDH16A1;SAE1;MCM2
ATF2 ENCODE	101/2852	0.0889407	0.188772	0	0	1.13688	2.751	ZMYND8;CISD2;ENO1;RBPJ;CCND3;TRIM28;CHEK1;EPC1;DLEU2;ARL6IP6;SRRM2;NOSIP;IFT80;RPSA;FBXO11;CD2AP;EEF1A1;CFDP1;RAF1;ATF4;ANKRD17;ANAPC15;GGNBP2;KMT2C;ITPR1;BAZ2B;VTI1A;EGR1;DARS;HSPA8;POU2F1;CRADD;SETD1A;FBXO36;MEMO1;INO80;EEF2;FOXN2;ELL2;EXT1;MOV10;ZZZ3;SP2;NASP;MDM4;XKR6;GSK3B;HSP90AB1;SLC44A1;CHD8;CLTC;CHD2;SMG5;SPRED2;LASP1;SART3;AP1G1;TRPS1;ANXA6;REV3L;ARIH1;YWHAG;BCAS3;PPP1R12A;TSC22D1;EED;E…
STAT3 ENCODE	29/725	0.101805	0.211755	0	0	1.28411	2.9338	ANKRD17;TCERG1;AHCYL2;MAML2;TULP2;IQGAP1;ARHGAP5;BICD1;IWS1;SMG5;RTN4;LASP1;REV3L;TBL1X;MPZL1;MAP4K3;YWHAG;WWOX;EGR1;KDM4C;PAWR;RAB27A;MEMO1;INO80;PNRC1;TOPORS;CCPG1;CCDC6;EIF3H
FOXP2 ENCODE	9/178	0.105145	0.214413	0	0	1.62317	3.65606	EXT1;SPRED2;EXOSC5;KAT6A;ALDH16A1;EPC2;ARIH1;TBL1X;EPN1
NELFE ENCODE	11/234	0.115596	0.231191	0	0	1.5091	3.25613	EEF1A1;EGR1;HSPA8;HSP90AB1;NASP;ARL15;ITPR1;RPSA;MALAT1;EEF2;ATF4
TRIM28 CHEA	10/210	0.121657	0.238724	0	0	1.5287	3.22028	EGR1;GSK3B;SALL1;PPP1R12A;LIFR;MAPT;TOP1;PTPN2;PTPRG;MCPH1
IRF3 ENCODE	26/663	0.136242	0.262393	0	0	1.25893	2.50945	TCERG1;GSK3B;ANAPC15;CDCA3;MTMR12;ANKRD11;CHD8;RTN4;ARVCF;SPTLC2;PWWP2A;E2F3;JARID2;ZSWIM3;ARL6IP6;STPG1;BCAS3;GATAD2B;ETV5;GATAD2A;PPM1B;SP2;KAT6B;EXOC4;MYH9;FRYL
YY1 CHEA	14/332	0.156508	0.295942	0	0	1.35373	2.51069	MACF1;GRAMD1B;DNMT3A;FBXO36;LNPEP;CHD2;YWHAZ;TOPORS;EEF1A1;GK5;CTIF;DEPTOR;SART3;E2F3
ERG CHEA	7/144	0.163309	0.303289	0	0	1.56055	2.82789	LYPLA1;SNAPC3;RAB27A;RALY;PKNOX1;ELL2;TBX3
MYC ENCODE	54/1515	0.165511	0.301984	0	0	1.14426	2.0582	ATF1;TCERG1;HSP90AB1;CLTC;ENO1;DCAF4;NUDT3;COIL;IMMP2L;REV3L;YWHAG;ARL6IP6;SRRM2;RPSA;METTL23;QTRT1;EEF1A1;CFDP1;SLTM;TBL1XR1;BIRC6;NCOA7;TOP1;ATF4;MCM2;SGMS1;TSACC;PVT1;ITPR1;TAF5L;RTN4;HSPD1;SCAF8;EXOSC5;DYM;SCAP;TBL1X;ANKRD28;DARS;HSPA8;POU2F1;KDM4C;WTAP;MEMO1;INO80;HSPE1;EEF2;FOXN2;ZZZ3;CCDC6;ANP32B;SAE1;PTPN2;EIF3A
EGR1 CHEA	13/315	0.186196	0.333868	0	0	1.32487	2.22706	TCERG1;EGR1;SMAD3;MAML2;CLTC;DNMT3A;ACTN4;ETV5;RELB;TANC1;PCM1;RICTOR;SPTAN1
SP2 ENCODE	36/994	0.195576	0.344744	0	0	1.16267	1.89726	TCERG1;ANAPC15;HIP1;CDCA3;MTMR12;TSACC;ANP32A;ANKRD11;CHD8;ENO1;DCAF4;RTN4;ARVCF;SPTLC2;PWWP2A;CNNM2;MPZL1;ZSWIM3;ARL6IP6;KDM6A;SMAD2;STPG1;BCAS3;HIPK1;GATAD2B;ETV5;GATAD2A;PPM1B;SP2;KAT6B;SP3;EXOC4;MYH9;MDM4;IFT46;FRYL
SPI1 CHEA	38/1056	0.198712	0.344434	0	0	1.15521	1.86671	GSK3B;AHNAK;TTYH2;LUZP1;ITPR1;PRKAG2;JMJD1C;PTPRJ;TSPAN32;RTN4;SPRED2;IMMP2L;CCND3;SART3;TLK1;UBTD1;PATZ1;SPTAN1;SMAD2;CASP8AP2;RNGTT;KDM4C;CRADD;DNMT3A;NOSIP;ELOVL6;YWHAZ;MANBAL;FBXL12;SRPK1;METTL23;ARPC2;SLTM;TNIP1;SYT11;AGPS;PTPN2;EIF3A
VDR CHEA	4/76	0.212114	0.361638	0	0	1.68962	2.61997	TLE4;CRADD;IRAK2;PTPN2
ETS1 ENCODE	7/156	0.214311	0.359489	0	0	1.44051	2.21885	CCND3;GGNBP2;HSP90AB1;KAT6A;CLTC;ARIH1;SMG5
SRF ENCODE	12/299	0.22432	0.370306	0	0	1.2884	1.92575	EGR1;MYO1E;ANAPC15;HMGXB4;PFKFB3;REV3L;EIF3H;INO80;TEX2;RAF1;MAPK14;TAF5L
BCL3 ENCODE	11/273	0.233256	0.379042	0	0	1.29352	1.88286	EEF1A1;ANKRD17;MOV10;GSK3B;TTLL3;KAT6A;SP3;MALAT1;TBL1X;CUEDC1;EPN1
MYOD1 ENCODE	7/166	0.260652	0.417043	0	0	1.35373	1.82018	ANXA6;SMYD1;E2F3;TRIM16;CCDC141;ATF4;TTN
ZBTB33 ENCODE	25/702	0.273085	0.430316	0	0	1.14326	1.48392	GGNBP2;CUL3;RBPJ;PDS5A;SMG5;SNAPC3;REV3L;RICTOR;BCAS3;DARS;PPP1R12A;CDC5L;IFT80;INO80;MAPK14;TOPORS;ETV5;CD2AP;ZZZ3;KAT6A;ALDH16A1;TAB2;QRICH1;IFT46;ATF4
SPI1 ENCODE	52/1540	0.290109	0.450319	0	0	1.08399	1.34143	AHCYL2;HIP1;ENO1;CHD2;SIPA1L3;CDC14A;RABGEF1;SPRED2;IMMP2L;PCM1;SART3;ZMIZ1;YWHAG;PLEKHG1;ACTN4;TMEM131;RNF168;SIK3;MYH9;CUEDC1;ANAPC15;TTYH2;ANP32A;CUL3;ITPR1;TULP2;IQGAP1;TAF5L;RTN4;HSPD1;EPB41L1;PCED1B;VTI1A;PIP5K1B;PATZ1;ANKRD28;SMAD2;SPEN;HSPA8;CRADD;AGK;MEMO1;VWA3B;HSPE1;FBXL12;RCAN1;CDK7;ARPC2;SYT11;TAB2;ANP32B;PTPN2
RFX5 ENCODE	20/559	0.293887	0.449474	0	0	1.14858	1.4065	TCERG1;GSK3B;MAP2K1;MTMR12;ARL15;KMT2C;COMMD1;RBPJ;YWHAZ;PNRC1;GATAD2A;PPM1B;ARVCF;NASP;KAT6B;ANXA6;SIK3;REV3L;PKP4;ZCCHC2
MAX ENCODE	69/2073	0.295907	0.446005	0	0	1.06854	1.30117	ATF1;TCERG1;AHCYL2;HSP90AB1;SLC44A1;CLTC;CISD2;ENO1;DCAF4;NUDT3;COIL;IMMP2L;ANXA6;REV3L;EPC1;XXYLT1;SRRM2;BCAS3;SLC39A11;RPSA;METTL23;QTRT1;CFDP1;KAT6A;BIRC6;PIGL;TOP1;DENND6A;TNFRSF21;MCM2;SGMS1;TSACC;PVT1;ITPR1;COX5A;TAF5L;HSPD1;EXOSC5;DYM;SCAP;UBTD1;E2F3;TBL1X;PAIP2;CNNM2;ANKRD28;SMAD2;SPEN;DARS;SMAD3;POU2F1;KDM4C;WTAP;FOXJ3;LNPEP;MEMO1;INO80;HSPE1;EEF2;FOXN2;RCAN1;CDK7;TADA2A;ZZZ3;DNAJA2;CCDC…
HDAC2 ENCODE	7/175	0.304532	0.452448	0	0	1.28411	1.52678	PPM1B;WTAP;REV3L;LNPEP;TBL1X;KCTD18;RTN4
ZC3H11A ENCODE	5/129	0.374779	0.548972	0	0	1.24429	1.22117	GGNBP2;SETD1A;AGO2;RAB27A;CNNM2
NRF1 ENCODE	61/1882	0.390542	0.564116	0	0	1.04052	0.978322	PGAP1;ENO1;RBPJ;WDR45;SPPL3;CRKL;SART3;YWHAG;LYPLA1;PPP1R12A;EED;IFT80;AP3B1;ACTN4;TOPORS;TFDP1;CFDP1;SLTM;WAC;BIRC6;ULK1;TOP1;MAPT;RAF1;MCPH1;PAFAH1B1;MCM2;SNAP47;CDCA3;TSACC;USP10;NRF1;IWS1;STRN3;U2AF1L4;HSPD1;EXOSC5;SCAP;UBTD1;SMYD3;PAIP2;WDTC1;SPEN;WWOX;HSPA8;RNGTT;RANBP3;POU2F1;KDM4C;UROS;MOK;CDC5L;HSPE1;EEF2;PNRC1;GATAD2A;SRPK1;ARPC2;ST5;ALDH16A1;PTPN2
NR2C2 ENCODE	12/350	0.408757	0.582339	0	0	1.10066	0.984693	ANAPC15;HMGXB4;WTAP;AGPS;DNAJA2;SCAP;INO80;RAF1;TAF5L;MANBAL;ARL6IP6;PAK4
E2F6 ENCODE	103/3245	0.433319	0.608989	0	0	1.01898	0.852151	TCERG1;UBXN2A;CISD2;ENO1;RBPJ;CRKL;CHEK1;PIEZO1;EPC1;DLEU2;PKNOX1;SRRM2;TOR3A;MAP2K1;CFDP1;PKP4;DENND6A;ATF4;RAI14;PFKFB3;CDCA3;KMT2C;CUL1;PDS5A;TAF5L;HMGXB4;DYM;TSPAN5;SCAP;SMYD3;PATZ1;ANKRD28;SMAD2;DARS;CREBBP;POU2F1;FBXO36;RAB27A;LNPEP;FOXN2;SRPK1;TADA2A;ZZZ3;NASP;SP3;ANP32B;CDK13;SAE1;SLC44A1;WDR45;BICD1;IMMP2L;SPTLC2;ANXA6;REV3L;XXYLT1;CFAP43;BCAS3;SLC39A11;TEX14;NAV1;CBFA2T2;METTL23;PPM1B;A…
TAF7 ENCODE	21/640	0.434974	0.603164	0	0	1.05337	0.876899	EGR1;HSPA8;HSP90AB1;ARL15;CLTC;FOXJ3;RPSA;ENO1;EEF2;CHD2;POU2F3;EEF1A1;NIPBL;TRIM28;SLTM;KAT6A;CHEK1;E2F3;CDK13;ATF4;ARL6IP6
PML ENCODE	51/1596	0.445397	0.609491	0	0	1.02584	0.829687	ATF1;GSK3B;SLC44A1;ENO1;SMG5;RABGEF1;CCND3;TRIM28;REV3L;EPC1;ARIH1;DLEU2;YWHAG;PPP1R12A;ARL15;EED;NOSIP;RPSA;YWHAZ;CD2AP;RNF168;EEF1A1;NCOR1;WAC;BIRC6;ULK1;PIGL;SOS1;RAF1;ANKRD17;SNAP47;SGMS1;ITPR1;NRF1;COX5A;IWS1;ATXN2;UBTD1;HSPA8;WTAP;SAMD4B;LNPEP;MEMO1;EEF2;POU2F3;MANBAL;SETX;SP3;ALDH16A1;CDK13;EIF3A
EZH2 CHEA	8/237	0.459294	0.620345	0	0	1.08364	0.843139	CHST8;CDH4;TESC;PRDM16;ESRRB;GRIK3;PKNOX2;RNF220
NFYB ENCODE	117/3715	0.463503	0.618003	0	0	1.01104	0.777434	TCERG1;ZMYND8;CISD2;ENO1;DCAF4;CDC14A;CRKL;RABGEF1;CCND3;DEPTOR;PWWP2A;EPC2;DLEU2;PKNOX1;ARL6IP6;TLE4;TOR3A;MAP2K1;ARL15;RPSA;TEX2;FBXO11;TRAIP;KAT6B;PKP4;ATF4;ANAPC15;GGNBP2;CDCA3;TSACC;ANP32A;CUL3;ANKRD11;IQGAP1;TAF5L;RTN4;WDTC1;ANKRD28;SMAD2;HSPA8;SMAD3;SETD1A;DSTN;FOXN2;ELL2;MANBAL;MED13L;SETX;EXT1;RCAN1;SP2;NASP;SP3;TBCE;CDK13;PGPEP1L;ZCCHC2;GSK3B;HIP1;MTMR12;CHD8;WDR45;SHB;ARHGAP5;CHD2;SMG5…
RAD21 ENCODE	40/1265	0.484518	0.637846	0	0	1.01511	0.735547	ATF1;ANKRD17;FHOD3;CEMIP;PCDHGB7;MAML2;FGF1;PDS5A;COIL;ABR;EPB41L4A;DEPTOR;MGAT5B;PIEZO1;EPC1;SCAP;APBB2;XXYLT1;CNNM2;ASIC1;STPG1;EPHA4;ARL15;IDH1;LIMK2;DNMT3A;ATP2B4;RAB27A;EEF2;MAPK14;PLXDC1;POU2F3;PCDHGA10;NCOR2;QTRT1;ICK;AGO2;LCOR;IFT46;TNFRSF21
KAT2A ENCODE	3/90	0.53483	0.69528	0	0	1.07009	0.669669	EGR1;HSP90AB1;CLTC
FOSL2 ENCODE	6/196	0.574708	0.737897	0	0	0.982737	0.544331	KPNA7;DSTN;ENO1;CTNNAL1;RTN4;FAM129B
IRF1 ENCODE	8/263	0.577197	0.732055	0	0	0.976509	0.536661	MOV10;SP2;COG5;CHD8;CLTC;RALY;YWHAG;PTPN2
EGR1 ENCODE	16/537	0.608227	0.762116	0	0	0.956506	0.475581	HSPA8;CCDC57;CLTC;BAZ2B;COX5A;TOPORS;SYN1;TMEM131;SETX;RNF168;PCM1;CCND3;UBL3;ZMIZ1;MALAT1;PAK4
TCF7L2 ENCODE	17/583	0.644758	0.798272	0	0	0.9361	0.410835	ATF1;CDK17;SMAD3;ANP32A;IDH1;CDC5L;BAZ2B;SORBS1;ARHGAP5;CHD2;TBX3;CTIF;SPRED2;FMNL2;ZMIZ1;MDM4;BIRC6
BCLAF1 ENCODE	25/851	0.648222	0.793119	0	0	0.943088	0.408849	HSP90AB1;SGMS1;CDCA3;SLC44A1;CLTC;MRPS31;PDS5A;CHD2;HSPD1;NIPBL;EPC1;ARL6IP6;EGR1;AGK;NOSIP;HSPE1;EPN1;RNF168;EEF1A1;NCOR1;ZZZ3;SLTM;BIRC6;PIGL;IFT46
CREB1 ENCODE	67/2238	0.656093	0.793414	0	0	0.961074	0.405048	HSP90AB1;MTMR12;CLTC;MSI2;RABGEF1;UBL3;SART3;TRIM28;AP1G1;PWWP2A;ARIH1;DLEU2;PKNOX1;ARL6IP6;KDM6A;TLE4;SRRM2;MAP2K1;COG5;NSMCE2;IFT80;TEX14;RPSA;CBFA2T2;EPN1;TRAIP;RNF168;METTL23;EEF1A1;PPM1B;CFDP1;KAT6B;EXOC4;SIK3;ANKRD17;ANAPC15;CDCA3;ANKRD11;IWS1;U2AF1L4;HSPD1;GK5;CDC37L1;E2F3;SRSF11;WDTC1;EGR1;KDM4C;FOXJ3;CDC5L;HSPE1;EEF2;ELL2;PNRC1;MANBAL;GATAD2A;SETX;EXT1;XPNPEP1;SP2;NASP;CCPG1;DNAJA2;EIF3H…
SUZ12 CHEA	50/1684	0.661916	0.791256	0	0	0.953169	0.393293	NRP2;PCDHGB7;PCDHGB6;TENM4;PCDHGB5;GRIK3;PRKAG2;CDH4;HHAT;ZMIZ1;PKNOX2;CHST8;KIRREL3;PCDHGA8;PCDHGA5;PCDHGA4;PCDHGA3;TESC;EBF1;GAB1;FRMD4B;PCDHGA9;RAB31;SLCO2A1;PCDHGB1;ROR2;MAPT;CUEDC1;KANK4;TNFRSF21;GRAMD1B;GLIS3;LYZL4;CTIF;DPP6;PRDM16;ZBTB7C;NTRK2;KCNJ6;PCDHGC4;PCDHGC3;BTBD11;HS3ST5;NMNAT2;ENOX1;PCDHGA10;PCDHGA11;PCDHGA12;PPP2R2C;RNF220
NFYA ENCODE	66/2250	0.719267	0.850043	0	0	0.94168	0.310305	TCERG1;GSK3B;HIP1;MTMR12;ZMYND8;CHD8;ENO1;WDR45;DCAF4;CRKL;CCND3;SPTLC2;ANXA6;PWWP2A;PKNOX1;CFAP43;ARL6IP6;KDM6A;TLE4;STPG1;BCAS3;TOR3A;ARL15;RPSA;FBXO11;ETV5;TRAIP;METTL23;PPM1B;KAT6B;EXOC4;MYH9;PKP4;ATF4;ANAPC15;CDCA3;TSACC;ANP32A;UHRF1;ANKRD11;TULP2;RTN4;SCAF8;ARVCF;E2F3;CNNM2;MPZL1;ZSWIM3;WDTC1;PAK4;SMAD2;CASP8AP2;HSPA8;WTAP;SAMD4B;FOXN2;GATAD2B;PNRC1;GATAD2A;SP2;NASP;SP3;ALDH16A1;QRICH1;CDK1…
TRIM28 ENCODE	3/120	0.726369	0.848791	0	0	0.802568	0.256578	HSP90AB1;TBL1X;CRKL
IRF8 CHEA	3/121	0.731536	0.84533	0	0	0.795935	0.248817	MOV10;HSP90AB1;PTPRJ
SIN3A ENCODE	32/1131	0.740016	0.845733	0	0	0.9083	0.273474	HSP90AB1;CLTC;DCAF4;TAF5L;SMG5;CDC14A;CRKL;U2AF1L4;HSPD1;SPRED2;EXOSC5;E2F3;DARS;FOXJ3;NSMCE2;SLC39A11;FBXO36;MOK;LNPEP;INO80;HSPE1;EEF2;METTL23;QTRT1;EEF1A1;CDK7;NASP;KAT6A;ULK1;TRIP12;QRICH1;IFT46
REST ENCODE	10/383	0.758111	0.856995	0	0	0.838191	0.232117	RIMS2;GUCY1A2;CEMIP;MGAT5B;DNMT3A;ACSL6;SCAP;EPC2;NMNAT2;SYN1
FOXA1 ENCODE	5/205	0.769096	0.860064	0	0	0.782993	0.205567	ALDH16A1;ULK1;TBL1X;RAPGEF5;ETV5
FLI1 ENCODE	17/650	0.80292	0.888337	0	0	0.83961	0.184295	CASP8AP2;CLTC;NOSIP;LNPEP;RPSA;MAPK14;EPN1;TRAIP;METTL23;NIPBL;CDK7;ARPC2;SP2;TBCE;PECAM1;CDK13;PAIP2
CEBPB ENCODE	3/144	0.830236	0.90889	0	0	0.668807	0.124429	ELMSAN1;NCOA7;TBL1X
STAT5A ENCODE	5/233	0.854976	0.926224	0	0	0.6889	0.107938	EGR1;AIM2;TULP2;MAPK14;STRN3
ATF3 ENCODE	2/114	0.87422	0.937308	0	0	0.563206	0.0757079	KDM4C;NSMCE2
EZH2 ENCODE	7/338	0.905334	0.960763	0	0	0.664849	0.0661199	GSK3B;STOX2;IGSF3;MGAT5B;JARID2;PLXDC1;PLEKHA7
CBX3 ENCODE	1/81	0.923349	0.969982	0	0	0.39633	0.0316067	SLC44A1
FOXM1 ENCODE	1/95	0.95088	0.988915	0	0	0.337923	0.0170204	PPM1B
SIX5 ENCODE	25/1094	0.961757	0.990324	0	0	0.733609	0.028606	AHCYL2;CDCA3;TSACC;ITPR1;TULP2;SIPA1L3;SMG5;U2AF1L4;CTIF;PCM1;UBL3;SNAPC3;DYM;JARID2;YWHAG;WDTC1;SRRM2;WWOX;CRADD;NCOA3;NOSIP;CFDP1;EXOC4;TRIM16;IFT46
GABPA ENCODE	50/2082	0.982404	1	0	0	0.770959	0.0136866	GSK3B;SLC44A1;CLTC;RABGEF1;NIPBL;SART3;CAPZB;ARFIP1;CSNK2A1;NOSIP;RPSA;EPN1;TRAIP;METTL23;NCOR1;KAT6A;BIRC6;PIGL;TRIM16;IFT46;ATF4;SNAP47;ANAPC15;CDCA3;MRPS31;U2AF1L4;HSPD1;ATXN2;VTI1A;CDC37L1;ZSWIM3;CRADD;AGK;CCDC57;FBXO36;SAMD4B;HSPE1;MANBAL;FBXL12;SETX;CDK7;ARPC2;SP2;SP3;EIF3H;ALDH16A1;MDM4;TRIP12;CDK13;TNRC6A
ELF1 ENCODE	57/2483	0.996168	1	0	0	0.736953	0.00282965	AHCYL2;CLTC;DCAF4;SIPA1L3;SMG5;SPRED2;PCM1;SART3;SPTLC2;FAM53B;ARFIP1;ARIH1;NSMCE2;SLC39A11;NOSIP;AP3B1;TOPORS;EPN1;RNF168;EXOC4;BIRC6;IFT46;KCTD18;MCPH1;ANKRD17;ANAPC15;ANKRD11;MRPS31;IWS1;HSPD1;VTI1A;ZSWIM3;CDK17;WWOX;DARS;HSPA8;RNGTT;CRADD;FBXO36;ATP2B4;HSPE1;HIPK1;MANBAL;GATAD2A;FBXL12;RCAN1;CDK7;SP2;SYT11;SP3;EIF3H;ALDH16A1;MDM4;TRIP12;CDK13;PTPN2;SNTB2

## Sheet: KEGG 2019 Human
Term	Overlap	P-value	Adjusted P-value	Old P-value	Old Adjusted P-value	Odds Ratio	Combined Score	Genes
Prostate cancer	15/97	3.11043e-07	9.58013e-05	0	0	4.96434	74.3824	GSK3B;MAP2K1;CREBBP;HSP90AA1;TCF7L1;HSP90AB1;PDGFA;ETV5;IGF1R;PDGFC;E2F3;RAF1;SOS1;FGFR2;ATF4
Regulation of actin cytoskeleton	22/214	1.00212e-06	0.000154326	0	0	3.30028	45.5881	MAP2K1;PPP1R12A;SRC;LIMK2;FN1;PDGFA;ACTN4;IQGAP1;FGF1;ARHGAP35;CRKL;FGF4;ENAH;TIAM1;ARPC2;PDGFC;MYH9;PIP5K1B;RAF1;SOS1;FGFR2;PAK4
Adherens junction	12/72	2.09106e-06	0.000214682	0	0	5.35045	69.9724	SMAD2;CREBBP;TCF7L1;YES1;SMAD3;CSNK2A1;SRC;PTPRJ;ACTN4;IQGAP1;SORBS1;IGF1R
Focal adhesion	20/199	4.37318e-06	0.000336735	0	0	3.2264	39.8139	GSK3B;MAP2K1;PPP1R12A;VWF;SRC;FN1;PDGFA;LAMC2;ACTN4;ARHGAP5;ARHGAP35;CRKL;IGF1R;CCND3;PDGFC;RAPGEF1;TLN2;RAF1;SOS1;PAK4
Rap1 signaling pathway	19/206	2.56148e-05	0.00157787	0	0	2.96093	31.304	MAP2K1;SRC;PDGFA;SIPA1L2;FGF1;MAPK14;SIPA1L3;CRKL;IGF1R;FGF4;TIAM1;PRKD3;PDGFC;KIT;RAPGEF1;TLN2;RAPGEF5;RAF1;FGFR2
Cell cycle	14/124	3.2542e-05	0.00167049	0	0	3.6245	37.4519	SMAD2;GSK3B;CREBBP;SMAD3;CUL1;YWHAZ;CDC14A;CCND3;CDK7;TFDP1;CHEK1;E2F3;YWHAG;MCM2
MAPK signaling pathway	23/295	5.5709e-05	0.00245119	0	0	2.50292	24.5171	HSPA8;NTRK2;MAP2K1;PDGFA;FGF1;MAPK14;CRKL;RELB;IGF1R;FGF4;PPM1A;PPM1B;RPS6KA2;PDGFC;KIT;TAB2;MAPT;RAF1;SOS1;MAP4K3;FGFR2;ATF4;MAP4K4
Neurotrophin signaling pathway	13/119	8.70547e-05	0.0033516	0	0	3.50702	32.787	GSK3B;NTRK2;MAP2K1;GAB1;IRAK3;MAPK14;CRKL;IRAK2;RPS6KA2;RAPGEF1;RAF1;SOS1;ATF4
Signaling pathways regulating pluripotency of stem cells	14/139	0.00011437	0.00391401	0	0	3.23337	29.3463	SMAD2;GSK3B;MAP2K1;SMAD3;ESRRB;LIFR;MAPK14;TBX3;IGF1R;KAT6A;RAF1;JARID2;FGFR2;BMPR1A
PI3K-Akt signaling pathway	24/354	0.000327869	0.0100984	0	0	2.17646	17.4615	GSK3B;NTRK2;MAP2K1;HSP90AA1;HSP90AB1;VWF;FN1;PDGFA;LAMC2;FGF1;YWHAZ;IGF1R;FGF4;CCND3;PPP2R2C;GNG7;PDGFC;KIT;SGK1;RAF1;SOS1;FGFR2;YWHAG;ATF4
Ras signaling pathway	17/232	0.00100975	0.0282729	0	0	2.35236	16.2267	NTRK2;MAP2K1;KSR1;GAB1;PDGFA;FGF1;IGF1R;FGF4;TIAM1;GNG7;PDGFC;KIT;RAPGEF5;RAF1;SOS1;FGFR2;PAK4
Renal cell carcinoma	8/69	0.00133071	0.0341548	0	0	3.72206	24.6476	MAP2K1;CREBBP;GAB1;RAPGEF1;RAF1;SOS1;CRKL;PAK4
Wnt signaling pathway	13/158	0.00137113	0.0324852	0	0	2.64136	17.4122	GSK3B;CREBBP;TCF7L1;SMAD3;CSNK2A1;CTBP2;CHD8;CUL1;CCND3;TBL1XR1;ROR2;TBL1X;LGR4
Proteoglycans in cancer	15/201	0.00163314	0.0359291	0	0	2.39573	15.374	SMAD2;MAP2K1;PPP1R12A;SRC;FN1;GAB1;ITPR1;ANK2;ANK3;IQGAP1;MAPK14;IGF1R;TIAM1;RAF1;SOS1
Gap junction	9/88	0.00166881	0.0342662	0	0	3.28323	20.9984	GUCY1A2;GJA1;MAP2K1;SRC;PDGFC;ITPR1;PDGFA;RAF1;SOS1
Melanoma	8/72	0.00175614	0.0338058	0	0	3.56697	22.6311	MAP2K1;PDGFC;PDGFA;E2F3;FGF1;RAF1;IGF1R;FGF4
Bacterial invasion of epithelial cells	8/74	0.00209484	0.0379535	0	0	3.47057	21.4074	SEPT9;ARPC2;SRC;CLTC;GAB1;FN1;CRKL;CD2AP
Gastric cancer	12/149	0.00247126	0.0422859	0	0	2.58545	15.5206	SMAD2;GSK3B;MAP2K1;TCF7L1;SMAD3;GAB1;E2F3;FGF1;RAF1;SOS1;FGFR2;FGF4
Choline metabolism in cancer	9/99	0.00374412	0.0606942	0	0	2.91843	16.3069	DGKG;MAP2K1;LYPLA1;SLC44A1;PDGFC;PDGFA;PIP5K1B;RAF1;SOS1
Estrogen signaling pathway	11/137	0.00376642	0.0580028	0	0	2.57759	14.3872	HSPA8;MAP2K1;HSP90AA1;KCNJ6;HSP90AB1;SRC;NCOA3;ITPR1;RAF1;SOS1;ATF4
Pathways in cancer	28/530	0.00481755	0.0706575	0	0	1.69599	9.04895	GSK3B;HSP90AB1;CTBP2;CUL1;PDGFA;LAMC2;FGF1;FGF4;CRKL;IGF1R;CCND3;GNG7;E2F3;SMAD2;CREBBP;MAP2K1;HSP90AA1;TCF7L1;SMAD3;TPM3;NCOA3;FN1;GSTA4;KIT;CCDC6;SOS1;RAF1;FGFR2
ErbB signaling pathway	8/85	0.00497115	0.0695961	0	0	3.02143	16.026	GSK3B;MAP2K1;SRC;GAB1;RAF1;SOS1;CRKL;PAK4
Hepatitis B	12/163	0.00511657	0.0685175	0	0	2.36339	12.4675	SMAD2;MAP2K1;CREBBP;SMAD3;SRC;TAB2;E2F3;RAF1;SOS1;MAPK14;YWHAZ;ATF4
Breast cancer	11/147	0.00638189	0.0819009	0	0	2.40225	12.1416	GSK3B;MAP2K1;TCF7L1;NCOA3;KIT;E2F3;FGF1;RAF1;SOS1;IGF1R;FGF4
Hepatocellular carcinoma	12/168	0.00648048	0.0798396	0	0	2.29305	11.5546	SMAD2;GSK3B;MAP2K1;TCF7L1;SMAD3;GSTA4;GAB1;E2F3;RAF1;SOS1;ARID1B;IGF1R
TGF-beta signaling pathway	8/90	0.00700015	0.0829249	0	0	2.85358	14.1589	TGIF1;SMAD2;CREBBP;TFDP1;SMAD3;SMURF1;CUL1;BMPR1A
FoxO signaling pathway	10/132	0.00836112	0.0953787	0	0	2.43202	11.6352	SMAD2;MAP2K1;CREBBP;SMAD3;PRKAG2;RAF1;SGK1;SOS1;MAPK14;IGF1R
GnRH signaling pathway	8/93	0.00848572	0.093343	0	0	2.76153	13.1707	EGR1;MAP2K1;SRC;ITPR1;RAF1;SOS1;MAPK14;ATF4
Chronic myeloid leukemia	7/76	0.00940474	0.0998848	0	0	2.95683	13.7982	MAP2K1;SMAD3;CTBP2;E2F3;RAF1;SOS1;CRKL
Endocytosis	15/244	0.00979863	0.100599	0	0	1.97353	9.12858	SMAD2;HSPA8;SMAD3;IQSEC1;SMURF1;SRC;CLTC;EPN1;IGF1R;RAB31;ARPC2;CAPZB;PIP5K1B;SH3GL2;FGFR2
Thyroid hormone signaling pathway	9/116	0.0103926	0.103255	0	0	2.49073	11.3743	RCAN1;GSK3B;MAP2K1;CREBBP;NCOR1;SRC;NCOA3;RAF1;MED13L
Insulin signaling pathway	10/137	0.0107173	0.103154	0	0	2.34326	10.6288	GSK3B;MAP2K1;PHKG1;RAPGEF1;PRKAG2;SORBS1;RAF1;SOS1;ACACB;CRKL
Ubiquitin mediated proteolysis	10/137	0.0107173	0.100028	0	0	2.34326	10.6288	UBE2R2;SMURF1;CUL3;CUL1;BIRC6;TRIP12;SAE1;MID1;UBE2K;PIAS2
Hippo signaling pathway	11/160	0.0116994	0.105983	0	0	2.20706	9.8175	SMAD2;GSK3B;CCND3;TCF7L1;SMAD3;PPP2R2C;WWC1;FGF1;YWHAZ;YWHAG;BMPR1A
Shigellosis	6/65	0.0155752	0.137062	0	0	2.96333	12.3336	ARPC2;SRC;NOD1;MAPK14;CRKL;U2AF1L4
Notch signaling pathway	5/48	0.0163983	0.140297	0	0	3.34403	13.7459	NCOR2;CREBBP;CTBP2;MAML2;RBPJ
Colorectal cancer	7/86	0.0177619	0.147856	0	0	2.61301	10.5323	SMAD2;GSK3B;MAP2K1;TCF7L1;SMAD3;RAF1;SOS1
Long-term potentiation	6/67	0.0178712	0.144851	0	0	2.87487	11.5701	MAP2K1;CREBBP;RPS6KA2;ITPR1;RAF1;ATF4
Relaxin signaling pathway	9/130	0.0205743	0.162484	0	0	2.2225	8.63153	SMAD2;MAP2K1;SMAD3;SRC;GNG7;RAF1;SOS1;MAPK14;ATF4
mTOR signaling pathway	10/152	0.0208347	0.160427	0	0	2.11202	8.17592	GSK3B;MAP2K1;DEPTOR;RPS6KA2;ULK1;RICTOR;RAF1;SGK1;SOS1;IGF1R
Oxytocin signaling pathway	10/153	0.0216952	0.162978	0	0	2.09822	8.03757	GUCY1A2;RCAN1;MAP2K1;KCNJ6;PPP1R12A;SRC;ITPR1;PRKAG2;RAF1;EEF2
Prolactin signaling pathway	6/70	0.0217338	0.159381	0	0	2.75166	10.5358	GSK3B;MAP2K1;SRC;RAF1;SOS1;MAPK14
Thyroid cancer	4/37	0.0273211	0.195695	0	0	3.47057	12.4944	TCF7L1;MAP2K1;TPM3;CCDC6
Apelin signaling pathway	9/137	0.0277426	0.194198	0	0	2.10894	7.56009	SMAD2;EGR1;MAP2K1;SMAD3;GNG7;ITPR1;PRKAG2;NRF1;RAF1
Cellular senescence	10/160	0.0284552	0.19476	0	0	2.00642	7.1417	SMAD2;CCND3;MAP2K1;SMAD3;CHEK1;ITPR1;E2F3;RAF1;HIPK1;MAPK14
Glioma	6/75	0.0293556	0.196555	0	0	2.56822	9.06138	MAP2K1;PDGFA;E2F3;RAF1;SOS1;IGF1R
Mannose type O-glycan biosynthesis	2020-03-23	0.0335227	0.21968	0	0	4.18731	14.2182	FUT9;MGAT5B;LARGE1
Endometrial cancer	5/58	0.0341512	0.219137	0	0	2.76748	9.34565	GSK3B;MAP2K1;TCF7L1;RAF1;SOS1
Human immunodeficiency virus 1 infection	12/212	0.0341973	0.214954	0	0	1.81714	6.13394	MAP2K1;AP1G1;GNG7;LIMK2;CHEK1;CUL1;ITPR1;TAB2;RAF1;MAPK14;CRKL;PAK4
Progesterone-mediated oocyte maturation	7/99	0.035029	0.215778	0	0	2.26989	7.60772	MAP2K1;HSP90AA1;HSP90AB1;RPS6KA2;RAF1;MAPK14;IGF1R
Bladder cancer	4/41	0.0380434	0.229752	0	0	3.13197	10.2385	MAP2K1;SRC;E2F3;RAF1
Long-term depression	5/60	0.0387264	0.229379	0	0	2.67523	8.69779	GUCY1A2;MAP2K1;ITPR1;RAF1;IGF1R
Platelet activation	8/124	0.0402287	0.233782	0	0	2.07114	6.65494	GUCY1A2;PPP1R12A;VWF;SRC;ITPR1;TLN2;MAPK14;ARHGAP35
Human T-cell leukemia virus 1 infection	12/219	0.0421375	0.24034	0	0	1.75905	5.5706	SMAD2;EGR1;CREBBP;CCND3;MAP2K1;RANBP3;SMAD3;CHEK1;E2F3;TLN2;ATF4;RELB
Phospholipase D signaling pathway	9/148	0.0422869	0.236807	0	0	1.95219	6.17533	DGKG;MAP2K1;PDGFC;KIT;GAB1;PDGFA;PIP5K1B;RAF1;SOS1
Central carbon metabolism in cancer	5/65	0.0517304	0.284517	0	0	2.46944	7.31377	MAP2K1;IDH1;KIT;RAF1;FGFR2
Dopaminergic synapse	8/131	0.0525807	0.28412	0	0	1.96047	5.77439	GSK3B;DDC;KCNJ6;PPP2R2C;GNG7;ITPR1;MAPK14;ATF4
Acute myeloid leukemia	5/66	0.054602	0.289956	0	0	2.43202	7.07156	MAP2K1;TCF7L1;KIT;RAF1;SOS1
Hedgehog signaling pathway	4/47	0.0580404	0.30299	0	0	2.73215	7.77737	GSK3B;SMURF1;CUL3;CUL1
Fatty acid biosynthesis	2020-02-13	0.0602182	0.30912	0	0	4.93888	13.8772	ACSL6;ACACB
Fc gamma R-mediated phagocytosis	6/91	0.0646624	0.326492	0	0	2.11666	5.79664	MAP2K1;ARPC2;LIMK2;PIP5K1B;RAF1;CRKL
Kaposi sarcoma-associated herpesvirus infection	10/186	0.0664272	0.329993	0	0	1.72595	4.68018	RCAN1;GSK3B;MAP2K1;CREBBP;SRC;GNG7;ITPR1;E2F3;RAF1;MAPK14
Fluid shear stress and atherosclerosis	8/139	0.0694004	0.339291	0	0	1.84764	4.92925	HSP90AA1;HSP90AB1;GSTA4;SRC;PECAM1;PDGFA;MAPK14;BMPR1A
AMPK signaling pathway	7/120	0.0813487	0.391491	0	0	1.87266	4.69852	PFKFB3;PPP2R2C;PRKAG2;ULK1;EEF2;ACACB;IGF1R
Glycosaminoglycan biosynthesis	4/53	0.0826338	0.391557	0	0	2.42285	6.04097	EXT1;NDST1;B3GNT2;HS3ST5
Pancreatic cancer	5/75	0.0844903	0.394288	0	0	2.14018	5.28864	SMAD2;MAP2K1;SMAD3;E2F3;RAF1
Prion diseases	3/35	0.0945465	0.434632	0	0	2.75166	6.49025	EGR1;MAP2K1;NCAM1
Human cytomegalovirus infection	11/225	0.0945615	0.428308	0	0	1.56947	3.70159	GSK3B;MAP2K1;SRC;GNG7;ITPR1;E2F3;RAF1;SOS1;MAPK14;CRKL;ATF4
Melanogenesis	6/101	0.0955834	0.426662	0	0	1.90709	4.47739	GSK3B;MAP2K1;CREBBP;TCF7L1;KIT;RAF1
T cell receptor signaling pathway	6/101	0.0955834	0.420567	0	0	1.90709	4.47739	GSK3B;MAP2K1;RAF1;SOS1;MAPK14;PAK4
Oocyte meiosis	7/125	0.0959465	0.416219	0	0	1.79775	4.21387	MAP2K1;RPS6KA2;CUL1;ITPR1;YWHAZ;YWHAG;IGF1R
Glucagon signaling pathway	6/103	0.102573	0.438785	0	0	1.87006	4.25847	CREBBP;PHKG1;ITPR1;PRKAG2;ACACB;ATF4
C-type lectin receptor signaling pathway	6/104	0.106166	0.447932	0	0	1.85208	4.15376	KSR1;SRC;ITPR1;RAF1;MAPK14;RELB
VEGF signaling pathway	4/59	0.111515	0.464143	0	0	2.17646	4.77427	MAP2K1;SRC;RAF1;MAPK14
Hepatitis C	8/155	0.111879	0.459451	0	0	1.65692	3.6292	GSK3B;MAP2K1;PPP2R2C;E2F3;RAF1;SOS1;YWHAZ;YWHAG
Axon guidance	9/181	0.113375	0.459469	0	0	1.59627	3.47516	ENAH;EPHA4;GSK3B;ABLIM1;SRC;LIMK2;SRGAP3;RAF1;PAK4
Parathyroid hormone synthesis, secretion and action	6/106	0.113543	0.454174	0	0	1.81714	3.95331	EGR1;MAP2K1;PDE4D;ITPR1;RAF1;ATF4
One carbon pool by folate	2020-02-20	0.127409	0.503102	0	0	3.21027	6.6143	ALDH1L1;TYMS
JAK-STAT signaling pathway	8/162	0.134084	0.522758	0	0	1.58532	3.18537	CCND3;CREBBP;PDGFA;LIFR;RAF1;SOS1;PIAS2;PTPN2
Leukocyte transendothelial migration	6/112	0.137167	0.528092	0	0	1.71979	3.41646	PECAM1;ACTN4;ARHGAP5;MAPK14;ARHGAP35;JAM2
Chemokine signaling pathway	9/190	0.140121	0.532804	0	0	1.52066	2.98847	CX3CR1;TIAM1;GSK3B;MAP2K1;SRC;GNG7;RAF1;SOS1;CRKL
Serotonergic synapse	6/113	0.141313	0.530785	0	0	1.70457	3.33547	MAP2K1;DDC;KCNJ6;GNG7;ITPR1;RAF1
Mitophagy	4/65	0.144213	0.535152	0	0	1.97555	3.82558	CSNK2A1;SRC;ULK1;ATF4
cGMP-PKG signaling pathway	8/166	0.147707	0.541591	0	0	1.54712	2.95891	GUCY1A2;MAP2K1;PPP1R12A;ADRB3;ITPR1;ATP2B4;RAF1;ATF4
Non-small cell lung cancer	4/66	0.149995	0.54351	0	0	1.94562	3.69115	MAP2K1;E2F3;RAF1;SOS1
Apoptosis	7/143	0.159328	0.570617	0	0	1.57146	2.88645	MAP2K1;ITPR1;DAB2IP;BIRC6;RAF1;SPTAN1;ATF4
Epithelial cell signaling in Helicobacter pylori infection	4/68	0.161816	0.572866	0	0	1.8884	3.43933	SRC;NOD1;MAPK14;JAM2
Fc epsilon RI signaling pathway	4/68	0.161816	0.566356	0	0	1.8884	3.43933	MAP2K1;RAF1;SOS1;MAPK14
Tight junction	8/170	0.161976	0.560545	0	0	1.51072	2.74997	TIAM1;PPP2R2C;SRC;PRKAG2;MYH9;ARHGAP17;ACTN4;JAM2
Glycosphingolipid biosynthesis	3/45	0.164418	0.562675	0	0	2.14018	3.86376	FUT9;ST8SIA1;B3GNT2
IL-17 signaling pathway	5/93	0.164437	0.556555	0	0	1.72595	3.11574	GSK3B;HSP90AA1;HSP90AB1;TAB2;MAPK14
Sphingolipid signaling pathway	6/119	0.16736	0.560293	0	0	1.61862	2.89346	MAP2K1;SPTLC2;SGMS1;PPP2R2C;RAF1;MAPK14
Viral carcinogenesis	9/201	0.176756	0.585385	0	0	1.43744	2.49106	CREBBP;CCND3;SRC;CHEK1;ACTN4;RBPJ;YWHAZ;YWHAG;ATF4
Cysteine and methionine metabolism	3/47	0.179871	0.589365	0	0	2.04911	3.51528	AHCYL2;DNMT3A;BCAT1
B cell receptor signaling pathway	4/71	0.180151	0.584068	0	0	1.8086	3.09988	GSK3B;MAP2K1;RAF1;SOS1
Glycosylphosphatidylinositol (GPI)-anchor biosynthesis	2020-02-25	0.182233	0.584664	0	0	2.56822	4.37232	PGAP1;PIGL
Thermogenesis	10/231	0.185659	0.589515	0	0	1.38973	2.34009	ADRB3;RPS6KA2;PRDM16;ACSL6;PRKAG2;COX1;SOS1;MAPK14;COX5A;ARID1B
Aldosterone synthesis and secretion	5/98	0.190657	0.599207	0	0	1.63789	2.71445	ATF1;PRKD3;ITPR1;ATP2B4;ATF4
AGE-RAGE signaling pathway in diabetic complications	5/100	0.201539	0.627011	0	0	1.60514	2.57106	SMAD2;EGR1;SMAD3;FN1;MAPK14
HIF-1 signaling pathway	5/100	0.201539	0.620741	0	0	1.60514	2.57106	MAP2K1;CREBBP;PFKFB3;ENO1;IGF1R
Autophagy	6/128	0.209815	0.639831	0	0	1.50482	2.34981	MAP2K1;DEPTOR;ITPR1;ULK1;RAF1;IGF1R
Longevity regulating pathway	5/102	0.212625	0.642045	0	0	1.57366	2.43638	HSPA8;PRKAG2;ULK1;IGF1R;ATF4
MicroRNAs in cancer	12/299	0.22432	0.670781	0	0	1.2884	1.92575	TRIM71;CREBBP;MAP2K1;DNMT3A;IGF2BP1;PDGFA;MDM4;E2F3;RAF1;SOS1;CRKL;PAK4
Transcriptional misregulation in cancer	8/186	0.224832	0.665849	0	0	1.38076	2.06065	ATF1;NCOR1;JMJD1C;PDGFA;KLF3;ETV5;IGF1R;KDM6A
Human papillomavirus infection	13/330	0.23143	0.678861	0	0	1.26465	1.85079	GSK3B;CREBBP;MAP2K1;TCF7L1;MAML2;VWF;FN1;LAMC2;RBPJ;CCND3;PPP2R2C;RAF1;SOS1
Th17 cell differentiation	5/107	0.241136	0.700658	0	0	1.50013	2.13378	SMAD2;HSP90AA1;SMAD3;HSP90AB1;MAPK14
Legionellosis	3/55	0.244924	0.705016	0	0	1.75106	2.4634	EEF1A1;HSPA8;HSPD1
Circadian rhythm	2/31	0.251354	0.716825	0	0	2.07114	2.86003	CUL1;PRKAG2
Mucin type O-glycan biosynthesis	2/31	0.251354	0.710248	0	0	2.07114	2.86003	GALNT2;C1GALT1
TNF signaling pathway	5/110	0.258712	0.724394	0	0	1.45921	1.97292	MAP2K1;DAB2IP;TAB2;MAPK14;ATF4
Measles	6/138	0.260819	0.723713	0	0	1.39577	1.87582	HSPA8;GSK3B;CCND3;CSNK2A1;EIF3H;TAB2
Propanoate metabolism	2/32	0.263003	0.723259	0	0	2.00642	2.67975	ACSS1;ACACB
Cholinergic synapse	5/112	0.270595	0.737551	0	0	1.43316	1.87333	MAP2K1;KCNJ6;GNG7;ITPR1;ATF4
Lysine degradation	3/59	0.278736	0.753076	0	0	1.63234	2.0853	KMT2C;SETD1A;KMT5B
Cell adhesion molecules (CAMs)	6/145	0.298272	0.79885	0	0	1.32839	1.60702	CDH4;CD80;PECAM1;NCAM1;JAM2;MPZL1
GABAergic synapse	4/89	0.30096	0.7991	0	0	1.44282	1.73251	NSF;KCNJ6;SRC;GNG7
Salivary secretion	4/90	0.308007	0.810821	0	0	1.42679	1.68023	GUCY1A2;ADRB3;ITPR1;ATP2B4
mRNA surveillance pathway	4/91	0.31507	0.822386	0	0	1.41111	1.62978	RNGTT;PPP2R2C;MSI2;SMG5
NOD-like receptor signaling pathway	7/178	0.319491	0.826917	0	0	1.26247	1.44051	HSP90AA1;HSP90AB1;AIM2;ITPR1;TAB2;NOD1;MAPK14
Tuberculosis	7/179	0.324505	0.832897	0	0	1.25541	1.41291	CREBBP;KSR1;IRAK2;SRC;RAF1;MAPK14;HSPD1
Alcoholism	7/180	0.329533	0.83881	0	0	1.24844	1.38587	NTRK2;MAP2K1;DDC;GNG7;RAF1;SOS1;ATF4
Pyruvate metabolism	2/39	0.344008	0.868479	0	0	1.64629	1.75674	ACSS1;ACACB
Cushing syndrome	6/155	0.353296	0.884676	0	0	1.24269	1.29295	GSK3B;MAP2K1;TCF7L1;ITPR1;E2F3;ATF4
Circadian entrainment	4/97	0.357648	0.888351	0	0	1.32382	1.36116	GUCY1A2;KCNJ6;GNG7;ITPR1
Adipocytokine signaling pathway	3/69	0.364351	0.897761	0	0	1.39577	1.40922	ACSL6;PRKAG2;ACACB
Renin secretion	3/69	0.364351	0.890636	0	0	1.39577	1.40922	GUCY1A2;ADRB3;ITPR1
Inflammatory mediator regulation of TRP channels	4/100	0.378953	0.919035	0	0	1.28411	1.24603	SRC;ITPR1;MAPK14;ASIC1
Type I diabetes mellitus	2/43	0.389081	0.936227	0	0	1.49315	1.40948	CD80;HSPD1
p53 signaling pathway	3/72	0.389855	0.930817	0	0	1.33761	1.26001	CCND3;CHEK1;MDM4
Vascular smooth muscle contraction	5/132	0.393377	0.932001	0	0	1.21601	1.13452	GUCY1A2;MAP2K1;PPP1R12A;ITPR1;RAF1
Huntington disease	7/193	0.395616	0.930151	0	0	1.16435	1.07971	CREBBP;HIP1;CLTC;ITPR1;COX1;NRF1;COX5A
Chagas disease (American trypanosomiasis)	4/103	0.400185	0.933765	0	0	1.24671	1.14177	SMAD2;SMAD3;PPP2R2C;MAPK14
Toll-like receptor signaling pathway	4/104	0.407237	0.943074	0	0	1.23472	1.10922	MAP2K1;CD80;TAB2;MAPK14
Protein processing in endoplasmic reticulum	6/165	0.408999	0.940088	0	0	1.16737	1.04368	HSPA8;HSP90AA1;HSP90AB1;DNAJA2;CUL1;ATF4
Basal transcription factors	2/45	0.411104	0.937926	0	0	1.42679	1.26828	CDK7;TAF5L
Phenylalanine metabolism	2020-01-17	0.416197	0.942563	0	0	1.8884	1.65536	DDC
Antigen processing and presentation	3/77	0.431741	0.970629	0	0	1.25076	1.05055	HSPA8;HSP90AA1;HSP90AB1
Ether lipid metabolism	2/47	0.432728	0.965798	0	0	1.36607	1.14429	AGPS;PAFAH1B1
Sphingolipid metabolism	2/47	0.432728	0.95885	0	0	1.36607	1.14429	SGMS1;SPTLC2
Insulin resistance	4/108	0.435258	0.957568	0	0	1.18899	0.989021	GSK3B;RPS6KA2;PRKAG2;ACACB
Epstein-Barr virus infection	7/201	0.436405	0.953282	0	0	1.11801	0.927033	NCOR2;CCND3;TAB2;E2F3;RBPJ;MAPK14;RELB
Cardiac muscle contraction	3/78	0.439998	0.954362	0	0	1.23472	1.01369	TPM3;COX1;COX5A
Synaptic vesicle cycle	3/78	0.439998	0.947688	0	0	1.23472	1.01369	NSF;RIMS1;CLTC
Alzheimer disease	6/171	0.442272	0.945971	0	0	1.12641	0.918961	GSK3B;ITPR1;COX1;MAPT;COX5A;RTN4
Influenza A	6/171	0.442272	0.939447	0	0	1.12641	0.918961	HSPA8;GSK3B;MAP2K1;CREBBP;RAF1;MAPK14
RNA degradation	3/79	0.448208	0.945535	0	0	1.21909	0.978317	EXOSC5;ENO1;HSPD1
Pantothenate and CoA biosynthesis	2020-01-19	0.452032	0.947114	0	0	1.68962	1.34156	BCAT1
Cocaine addiction	2/49	0.453919	0.944642	0	0	1.31032	1.03493	DDC;ATF4
Toxoplasmosis	4/113	0.469735	0.970996	0	0	1.13638	0.858633	HSPA8;TAB2;LAMC2;MAPK14
ECM-receptor interaction	3/82	0.472537	0.970275	0	0	1.17449	0.880445	VWF;FN1;LAMC2
Adrenergic signaling in cardiomyocytes	5/145	0.472958	0.964708	0	0	1.10699	0.828858	PPP2R2C;TPM3;ATP2B4;MAPK14;ATF4
Glutamatergic synapse	4/114	0.47654	0.965621	0	0	1.12641	0.8349	GNG7;ITPR1;GRIK3;GRIK4
Peroxisome	3/83	0.480538	0.967357	0	0	1.16034	0.850355	IDH1;AGPS;ACSL6
Retrograde endocannabinoid signaling	5/148	0.490893	0.981786	0	0	1.08455	0.771691	RIMS1;KCNJ6;GNG7;ITPR1;MAPK14
cAMP signaling pathway	7/212	0.491727	0.977109	0	0	1.06	0.752419	TIAM1;CREBBP;MAP2K1;PPP1R12A;PDE4D;ATP2B4;RAF1
Hypertrophic cardiomyopathy (HCM)	3/85	0.496365	0.980002	0	0	1.13304	0.793629	TPM3;PRKAG2;TTN
Non-alcoholic fatty liver disease (NAFLD)	5/149	0.496822	0.974658	0	0	1.07727	0.753577	GSK3B;PRKAG2;COX1;COX5A;ATF4
Salmonella infection	3/86	0.504187	0.982846	0	0	1.11986	0.76689	ARPC2;MYH9;MAPK14
Pathogenic Escherichia coli infection	2/55	0.514639	0.99691	0	0	1.16737	0.775474	ARPC2;YWHAZ
Protein export	2020-01-23	0.517248	0.995702	0	0	1.39577	0.920139	IMMP2L
Renin-angiotensin system	2020-01-23	0.517248	0.989517	0	0	1.39577	0.920139	LNPEP
Glutathione metabolism	2/56	0.524317	0.99685	0	0	1.14653	0.740264	GSTA4;IDH1
Lysosome	4/123	0.536113	1	0	0	1.04399	0.650835	AP1G1;CLTC;AP3B1;LITAF
Morphine addiction	3/91	0.542322	1	0	0	1.05833	0.647588	KCNJ6;PDE4D;GNG7
Th1 and Th2 cell differentiation	3/92	0.549744	1	0	0	1.04683	0.62632	MAML2;RBPJ;MAPK14
Small cell lung cancer	3/93	0.557094	1	0	0	1.03557	0.605831	FN1;LAMC2;E2F3
Osteoclast differentiation	4/127	0.561478	1	0	0	1.01111	0.583595	MAP2K1;TAB2;MAPK14;RELB
Glycerolipid metabolism	2/61	0.570724	1	0	0	1.05255	0.590321	DGKG;AGK
NF-kappa B signaling pathway	3/95	0.571577	1	0	0	1.01377	0.567059	CSNK2A1;TAB2;RELB
Biosynthesis of unsaturated fatty acids	2020-01-27	0.574713	1	0	0	1.18899	0.658563	ELOVL6
Fatty acid elongation	2020-01-27	0.574713	1	0	0	1.18899	0.658563	ELOVL6
Amoebiasis	3/96	0.578707	1	0	0	1.00321	0.548715	FN1;LAMC2;ACTN4
Basal cell carcinoma	2/63	0.588345	1	0	0	1.01913	0.540591	GSK3B;TCF7L1
Phosphatidylinositol signaling system	3/99	0.599644	1	0	0	0.97281	0.497514	DGKG;ITPR1;PIP5K1B
Spliceosome	4/134	0.603979	1	0	0	0.95829	0.483185	TCERG1;HSPA8;CDC5L;U2AF1L4
Cortisol synthesis and secretion	2/65	0.605424	1	0	0	0.987776	0.495692	ITPR1;ATF4
Inflammatory bowel disease (IBD)	2/65	0.605424	1	0	0	0.987776	0.495692	SMAD2;SMAD3
Citrate cycle (TCA cycle)	2020-01-30	0.613283	1	0	0	1.07009	0.523198	IDH1
Glyoxylate and dicarboxylate metabolism	2020-01-30	0.613283	1	0	0	1.07009	0.523198	ACSS1
Nicotinate and nicotinamide metabolism	2020-01-30	0.613283	1	0	0	1.07009	0.523198	NMNAT2
Amphetamine addiction	2/68	0.630025	1	0	0	0.944198	0.436215	DDC;ATF4
Glycolysis / Gluconeogenesis	2/68	0.630025	1	0	0	0.944198	0.436215	ENO1;ACSS1
Fructose and mannose metabolism	1/33	0.64836	1	0	0	0.97281	0.421527	PFKFB3
SNARE interactions in vesicular transport	1/34	0.659332	1	0	0	0.944198	0.393285	VTI1A
Arrhythmogenic right ventricular cardiomyopathy (ARVC)	2/72	0.660946	1	0	0	0.891742	0.369256	GJA1;TCF7L1
Leishmaniasis	2/74	0.675611	1	0	0	0.867641	0.340235	TAB2;MAPK14
PPAR signaling pathway	2/74	0.675611	1	0	0	0.867641	0.340235	ACSL6;SORBS1
Thyroid hormone synthesis	2/74	0.675611	1	0	0	0.867641	0.340235	ITPR1;ATF4
DNA replication	1/36	0.68026	1	0	0	0.891742	0.34357	MCM2
Tyrosine metabolism	1/36	0.68026	1	0	0	0.891742	0.34357	DDC
Pertussis	2/76	0.689757	1	0	0	0.844809	0.313775	NOD1;MAPK14
Aldosterone-regulated sodium reabsorption	1/37	0.690238	1	0	0	0.867641	0.321651	SGK1
Allograft rejection	1/38	0.699905	1	0	0	0.844809	0.301437	CD80
Ferroptosis	1/40	0.718345	1	0	0	0.802568	0.265494	ACSL6
Graft-versus-host disease	1/41	0.727136	1	0	0	0.782993	0.249495	CD80
Porphyrin and chlorophyll metabolism	1/42	0.735653	1	0	0	0.764351	0.234653	UROS
Tryptophan metabolism	1/42	0.735653	1	0	0	0.764351	0.234653	DDC
Fatty acid degradation	1/44	0.751899	1	0	0	0.729607	0.20805	ACSL6
Vasopressin-regulated water reabsorption	1/44	0.751899	1	0	0	0.729607	0.20805	NSF
Insulin secretion	2/86	0.753011	1	0	0	0.746575	0.211785	RIMS2;ATF4
Nucleotide excision repair	1/47	0.774418	1	0	0	0.683037	0.174614	CDK7
Natural killer cell mediated cytotoxicity	3/131	0.779046	1	0	0	0.735177	0.183563	MAP2K1;RAF1;SOS1
Dilated cardiomyopathy (DCM)	2/91	0.780257	1	0	0	0.705554	0.175071	TPM3;TTN
Endocrine and other factor-regulated calcium reabsorption	1/48	0.781462	1	0	0	0.668807	0.16492	CLTC
Intestinal immune network for IgA production	1/48	0.781462	1	0	0	0.668807	0.16492	CD80
Valine, leucine and isoleucine degradation	1/48	0.781462	1	0	0	0.668807	0.16492	BCAT1
Malaria	1/49	0.788286	1	0	0	0.655158	0.155859	PECAM1
Ovarian steroidogenesis	1/49	0.788286	1	0	0	0.655158	0.155859	IGF1R
N-Glycan biosynthesis	1/50	0.794897	1	0	0	0.642055	0.147379	MGAT5B
Amyotrophic lateral sclerosis (ALS)	1/51	0.801302	1	0	0	0.629465	0.139438	MAPK14
Glycerophospholipid metabolism	2/97	0.809445	1	0	0	0.661912	0.139933	DGKG;LYPLA1
Autoimmune thyroid disease	1/53	0.813519	1	0	0	0.605712	0.125011	CD80
Pancreatic secretion	2/98	0.813959	1	0	0	0.655158	0.134861	ITPR1;ATP2B4
Fanconi anemia pathway	1/54	0.819343	1	0	0	0.594495	0.118455	REV3L
Regulation of lipolysis in adipocytes	1/55	0.824985	1	0	0	0.583686	0.112295	ADRB3
Pyrimidine metabolism	1/57	0.835748	1	0	0	0.563206	0.101055	TYMS
Calcium signaling pathway	4/188	0.841077	1	0	0	0.683037	0.118214	ADRB3;PHKG1;ITPR1;ATP2B4
Viral myocarditis	1/59	0.84585	1	0	0	0.544114	0.0910917	CD80
Arachidonic acid metabolism	1/63	0.864231	1	0	0	0.509567	0.0743535	PTGES
Cytosolic DNA-sensing pathway	1/63	0.864231	1	0	0	0.509567	0.0743535	AIM2
Aminoacyl-tRNA biosynthesis	1/66	0.876566	1	0	0	0.486405	0.0640807	DARS
RIG-I-like receptor signaling pathway	1/70	0.891289	1	0	0	0.45861	0.0527799	MAPK14
RNA transport	3/165	0.89143	1	0	0	0.583686	0.0670818	EEF1A1;EIF3H;EIF3A
Inositol phosphate metabolism	1/74	0.904258	1	0	0	0.433821	0.0436597	PIP5K1B
Metabolism of xenobiotics by cytochrome P450	1/74	0.904258	1	0	0	0.433821	0.0436597	GSTA4
Gastric acid secretion	1/75	0.907252	1	0	0	0.428036	0.041663	ITPR1
Purine metabolism	2/129	0.913854	1	0	0	0.497717	0.0448366	GUCY1A2;PDE4D
Complement and coagulation cascades	1/79	0.91832	1	0	0	0.406364	0.0346262	VWF
Oxidative phosphorylation	2/133	0.92225	1	0	0	0.482748	0.0390731	COX1;COX5A
Systemic lupus erythematosus	2/133	0.92225	1	0	0	0.482748	0.0390731	CD80;ACTN4
Chemical carcinogenesis	1/82	0.925746	1	0	0	0.391497	0.0302061	GSTA4
Parkinson disease	2/142	0.938407	1	0	0	0.452151	0.0287438	COX1;COX5A
Rheumatoid arthritis	1/91	0.944218	1	0	0	0.352777	0.0202486	CD80
Cytokine-cytokine receptor interaction	5/294	0.953754	1	0	0	0.545965	0.0258509	CX3CR1;LIFR;GDF3;TNFRSF21;BMPR1A
Hematopoietic cell lineage	1/97	0.953906	1	0	0	0.330956	0.0156177	KIT
Ribosome biogenesis in eukaryotes	1/101	0.959412	1	0	0	0.317849	0.0131698	CSNK2A1
Necroptosis	2/162	0.963653	1	0	0	0.39633	0.0146736	HSP90AA1;HSP90AB1
Drug metabolism	1/108	0.967515	1	0	0	0.297247	0.00981642	GSTA4
Ribosome	1/153	0.992251	1	0	0	0.209822	0.00163216	RPSA
Neuroactive ligand-receptor interaction	3/338	0.998492	1	0	0	0.284935	0.000429989	ADRB3;GRIK3;GRIK4
Herpes simplex virus 1 infection	5/492	0.999473	1	0	0	0.326247	0.000171873	POU2F1;SRC;TAB2;POU2F3;SRPK1
Olfactory transduction	1/444	0.999996	1	0	0	0.0723034	3.17039e-07	GNG7

## Sheet: REACTOME 2015
Term	Overlap	P-value	Adjusted P-value	Old P-value	Old Adjusted P-value	Odds Ratio	Combined Score	Genes
Developmental Biology Homo sapiens R-HSA-1266738	64/786	2.0707e-12	3.16817e-09	0	0	2.61396	70.3238	GSK3B;NRP2;HSP90AB1;CLTC;RBPJ;SHB;FGF1;ARHGAP35;FGF4;SPRED2;CDH4;CCND3;SALL1;SALL4;RPS6KA2;PKNOX1;SPTAN1;SH3GL2;KDM6A;EPHA4;MAP2K1;HSP90AA1;CSNK2A1;KSR1;VWF;TSC22D1;EED;NCOA3;EBF1;ANK2;ANK3;IL17RD;PIAS2;NCOR2;ENAH;TIAM1;NCOR1;TBL1XR1;KIT;MYH9;SOS1;RAF1;SRC;CUL3;KMT2C;PDGFA;IQGAP1;ABLIM1;NCAM1;SRGAP3;TBL1X;PAK4;SMAD2;HSPA8;CREBBP;YES1;SMAD3;LIMK2;FN1;DAB2IP;MAPK14;MED13L;ARPC2;FGFR2
NGF signalling via TRKA from the plasma membrane Homo sapiens R-HSA-187037	36/374	2.23973e-09	1.7134e-06	0	0	3.0901	61.5453	ATF1;GSK3B;SRC;CD80;CUL3;ITPR1;PDGFA;IQGAP1;FGF1;CRKL;FGF4;SPRED2;RPS6KA2;PIP5K1B;RICTOR;NCAM1;SPTAN1;SH3GL2;NTRK2;MAP2K1;KSR1;VWF;FN1;GAB1;DAB2IP;IL17RD;MAPK14;MOV10;AGO1;AGO2;KIT;RAPGEF1;RAF1;SOS1;FGFR2;TNRC6A
Signalling by NGF Homo sapiens R-HSA-166520	40/450	2.90962e-09	1.48391e-06	0	0	2.85358	56.0877	ATF1;GSK3B;SRC;CUL3;CD80;ITPR1;PDGFA;IQGAP1;FGF1;RTN4;FGF4;CRKL;ABR;SPRED2;RPS6KA2;PIP5K1B;RICTOR;NCAM1;SPTAN1;SH3GL2;NTRK2;MAP2K1;KSR1;VWF;FN1;DAB2IP;GAB1;IL17RD;MAPK14;MOV10;TIAM1;AGO1;AGO2;KIT;RAPGEF1;ARHGEF3;SOS1;RAF1;TNRC6A;FGFR2
Axon guidance Homo sapiens R-HSA-422475	42/515	1.46292e-08	5.59565e-06	0	0	2.61809	47.2309	GSK3B;NRP2;HSP90AB1;SRC;CUL3;CLTC;PDGFA;IQGAP1;SHB;FGF1;ARHGAP35;FGF4;SPRED2;ABLIM1;RPS6KA2;NCAM1;SRGAP3;SPTAN1;SH3GL2;PAK4;EPHA4;HSPA8;MAP2K1;HSP90AA1;YES1;CSNK2A1;KSR1;VWF;LIMK2;FN1;DAB2IP;ANK2;ANK3;IL17RD;ENAH;TIAM1;ARPC2;KIT;MYH9;SOS1;RAF1;FGFR2
Signaling by ERBB4 Homo sapiens R-HSA-1236394	32/330	1.47813e-08	4.52309e-06	0	0	3.11299	56.1269	GSK3B;SRC;CD80;CUL3;CUL1;PDGFA;IQGAP1;FGF1;FGF4;SPRED2;PIP5K1B;RICTOR;NCAM1;SPTAN1;WWOX;MAP2K1;KSR1;VWF;FN1;GAB1;DAB2IP;IL17RD;MOV10;NCOR1;AGO1;AGO2;KIT;TAB2;RAF1;SOS1;FGFR2;TNRC6A
Signaling by EGFR Homo sapiens R-HSA-177929	32/355	8.24678e-08	2.10293e-05	0	0	2.89377	47.1998	GSK3B;SRC;CD80;CUL3;ITPR1;PDGFA;IQGAP1;PTPRK;FGF1;FGF4;SPRED2;PIP5K1B;RICTOR;NCAM1;SPTAN1;SH3GL2;MAP2K1;KSR1;VWF;FN1;GAB1;DAB2IP;IL17RD;EPN1;MOV10;AGO1;AGO2;KIT;RAF1;SOS1;FGFR2;TNRC6A
Downstream signal transduction Homo sapiens R-HSA-186763	31/341	1.08708e-07	2.37605e-05	0	0	2.91843	46.7959	GSK3B;SRC;CD80;CUL3;ITPR1;PDGFA;IQGAP1;FGF1;CRKL;FGF4;SPRED2;PIP5K1B;RICTOR;NCAM1;SPTAN1;MAP2K1;KSR1;VWF;FN1;GAB1;DAB2IP;IL17RD;MOV10;AGO1;AGO2;KIT;RAPGEF1;RAF1;SOS1;FGFR2;TNRC6A
Signaling by SCF-KIT Homo sapiens R-HSA-1433557	30/325	1.24915e-07	2.38899e-05	0	0	2.96333	47.104	GSK3B;SRC;CD80;CUL3;PDGFA;IQGAP1;FGF1;FGF4;SPRED2;CHEK1;PIP5K1B;RICTOR;NCAM1;SPTAN1;MAP2K1;YES1;KSR1;VWF;FN1;GAB1;DAB2IP;IL17RD;MOV10;AGO1;AGO2;KIT;RAF1;SOS1;FGFR2;TNRC6A
Signaling by PDGF Homo sapiens R-HSA-186797	32/364	1.46536e-07	2.4911e-05	0	0	2.82222	44.4104	GSK3B;SRC;CD80;CUL3;ITPR1;PDGFA;IQGAP1;FGF1;CRKL;FGF4;SPRED2;PDGFC;PIP5K1B;RICTOR;NCAM1;SPTAN1;MAP2K1;KSR1;VWF;FN1;GAB1;DAB2IP;IL17RD;MOV10;AGO1;AGO2;KIT;RAPGEF1;RAF1;SOS1;FGFR2;TNRC6A
Chromatin organization Homo sapiens R-HSA-4839726	24/226	1.77765e-07	2.7198e-05	0	0	3.40914	52.9876	CREBBP;BRD1;KDM4C;EED;KMT2C;SETD1A;DNMT3A;ARID1B;GATAD2B;TAF5L;GATAD2A;NCOR2;ZZZ3;TADA2A;NCOR1;KANSL1;TBL1XR1;KAT6B;KAT6A;PRDM16;EPC1;TBL1X;SMYD3;KDM6A
Chromatin modifying enzymes Homo sapiens R-HSA-3247509	24/226	1.77765e-07	2.47254e-05	0	0	3.40914	52.9876	CREBBP;BRD1;KDM4C;EED;KMT2C;SETD1A;DNMT3A;ARID1B;GATAD2B;TAF5L;GATAD2A;NCOR2;ZZZ3;TADA2A;NCOR1;KANSL1;TBL1XR1;KAT6B;KAT6A;PRDM16;EPC1;TBL1X;SMYD3;KDM6A
MAPK family signaling cascades Homo sapiens R-HSA-5683057	27/284	2.96026e-07	3.77434e-05	0	0	3.05202	45.8805	SRC;CUL3;PDGFA;IQGAP1;FGF1;CDC14A;FGF4;SPRED2;CCND3;IGF2BP1;NCAM1;SPTAN1;MAP2K1;KSR1;VWF;NCOA3;FN1;DAB2IP;IL17RD;MOV10;AGO1;AGO2;KIT;RAF1;SOS1;FGFR2;TNRC6A
Downstream signaling of activated FGFR2 Homo sapiens R-HSA-5654696	29/329	5.32581e-07	6.26807e-05	0	0	2.82972	40.8769	GSK3B;SRC;CD80;CUL3;ITPR1;PDGFA;IQGAP1;FGF1;FGF4;SPRED2;PIP5K1B;RICTOR;NCAM1;SPTAN1;MAP2K1;KSR1;VWF;FN1;GAB1;DAB2IP;IL17RD;MOV10;AGO1;AGO2;KIT;RAF1;SOS1;FGFR2;TNRC6A
Downstream signaling of activated FGFR4 Homo sapiens R-HSA-5654716	29/329	5.32581e-07	5.82035e-05	0	0	2.82972	40.8769	GSK3B;SRC;CD80;CUL3;ITPR1;PDGFA;IQGAP1;FGF1;FGF4;SPRED2;PIP5K1B;RICTOR;NCAM1;SPTAN1;MAP2K1;KSR1;VWF;FN1;GAB1;DAB2IP;IL17RD;MOV10;AGO1;AGO2;KIT;RAF1;SOS1;FGFR2;TNRC6A
Downstream signaling of activated FGFR3 Homo sapiens R-HSA-5654708	29/329	5.32581e-07	5.43233e-05	0	0	2.82972	40.8769	GSK3B;SRC;CD80;CUL3;ITPR1;PDGFA;IQGAP1;FGF1;FGF4;SPRED2;PIP5K1B;RICTOR;NCAM1;SPTAN1;MAP2K1;KSR1;VWF;FN1;GAB1;DAB2IP;IL17RD;MOV10;AGO1;AGO2;KIT;RAF1;SOS1;FGFR2;TNRC6A
Signaling by FGFR4 Homo sapiens R-HSA-5654743	29/332	6.42412e-07	6.14307e-05	0	0	2.80415	39.9817	GSK3B;SRC;CD80;CUL3;ITPR1;PDGFA;IQGAP1;FGF1;FGF4;SPRED2;PIP5K1B;RICTOR;NCAM1;SPTAN1;MAP2K1;KSR1;VWF;FN1;GAB1;DAB2IP;IL17RD;MOV10;AGO1;AGO2;KIT;RAF1;SOS1;FGFR2;TNRC6A
Downstream signaling of activated FGFR1 Homo sapiens R-HSA-5654687	29/332	6.42412e-07	5.78171e-05	0	0	2.80415	39.9817	GSK3B;SRC;CD80;CUL3;ITPR1;PDGFA;IQGAP1;FGF1;FGF4;SPRED2;PIP5K1B;RICTOR;NCAM1;SPTAN1;MAP2K1;KSR1;VWF;FN1;GAB1;DAB2IP;IL17RD;MOV10;AGO1;AGO2;KIT;RAF1;SOS1;FGFR2;TNRC6A
Signaling by FGFR3 Homo sapiens R-HSA-5654741	29/333	6.83449e-07	5.80932e-05	0	0	2.79573	39.6885	GSK3B;SRC;CD80;CUL3;ITPR1;PDGFA;IQGAP1;FGF1;FGF4;SPRED2;PIP5K1B;RICTOR;NCAM1;SPTAN1;MAP2K1;KSR1;VWF;FN1;GAB1;DAB2IP;IL17RD;MOV10;AGO1;AGO2;KIT;RAF1;SOS1;FGFR2;TNRC6A
Signaling by FGFR1 Homo sapiens R-HSA-5654736	29/336	8.21569e-07	6.61579e-05	0	0	2.77077	38.8242	GSK3B;SRC;CD80;CUL3;ITPR1;PDGFA;IQGAP1;FGF1;FGF4;SPRED2;PIP5K1B;RICTOR;NCAM1;SPTAN1;MAP2K1;KSR1;VWF;FN1;GAB1;DAB2IP;IL17RD;MOV10;AGO1;AGO2;KIT;RAF1;SOS1;FGFR2;TNRC6A
DAP12 signaling Homo sapiens R-HSA-2424491	29/344	1.32592e-06	0.000101433	0	0	2.70633	36.6259	GSK3B;SRC;CD80;CUL3;ITPR1;PDGFA;IQGAP1;FGF1;FGF4;SPRED2;PIP5K1B;RICTOR;NCAM1;SPTAN1;MAP2K1;KSR1;VWF;FN1;GAB1;DAB2IP;IL17RD;MOV10;AGO1;AGO2;KIT;RAF1;SOS1;FGFR2;TNRC6A
Fc epsilon receptor (FCERI) signaling Homo sapiens R-HSA-2454202	31/395	2.60676e-06	0.000189921	0	0	2.51945	32.3936	GSK3B;SRC;CUL3;CD80;CUL1;ITPR1;PDGFA;IQGAP1;FGF1;FGF4;SPRED2;PIP5K1B;RICTOR;NCAM1;SPTAN1;MAP2K1;KSR1;VWF;FN1;DAB2IP;GAB1;IL17RD;MOV10;AGO1;AGO2;KIT;TAB2;SOS1;RAF1;TNRC6A;FGFR2
DAP12 interactions Homo sapiens R-HSA-2172127	29/359	3.10887e-06	0.000216208	0	0	2.59326	32.8857	GSK3B;SRC;CD80;CUL3;ITPR1;PDGFA;IQGAP1;FGF1;FGF4;SPRED2;PIP5K1B;RICTOR;NCAM1;SPTAN1;MAP2K1;KSR1;VWF;FN1;GAB1;DAB2IP;IL17RD;MOV10;AGO1;AGO2;KIT;RAF1;SOS1;FGFR2;TNRC6A
Signaling by FGFR2 Homo sapiens R-HSA-5654738	29/361	3.46818e-06	0.00023071	0	0	2.57889	32.4215	GSK3B;SRC;CD80;CUL3;ITPR1;PDGFA;IQGAP1;FGF1;FGF4;SPRED2;PIP5K1B;RICTOR;NCAM1;SPTAN1;MAP2K1;KSR1;VWF;FN1;GAB1;DAB2IP;IL17RD;MOV10;AGO1;AGO2;KIT;RAF1;SOS1;FGFR2;TNRC6A
Pre-NOTCH Transcription and Translation Homo sapiens R-HSA-1912408	9/41	3.74237e-06	0.000238576	0	0	7.04694	88.0571	MOV10;CREBBP;TFDP1;MAML2;AGO1;AGO2;E2F3;RBPJ;TNRC6A
Signaling by FGFR Homo sapiens R-HSA-190236	29/366	4.53976e-06	0.000277833	0	0	2.54366	31.2937	GSK3B;SRC;CD80;CUL3;ITPR1;PDGFA;IQGAP1;FGF1;FGF4;SPRED2;PIP5K1B;RICTOR;NCAM1;SPTAN1;MAP2K1;KSR1;VWF;FN1;GAB1;DAB2IP;IL17RD;MOV10;AGO1;AGO2;KIT;RAF1;SOS1;FGFR2;TNRC6A
Signaling by NOTCH Homo sapiens R-HSA-157118	15/122	6.04035e-06	0.000355451	0	0	3.94706	47.432	TLE4;CREBBP;MAML2;CUL1;RBPJ;NCOR2;MOV10;TFDP1;NCOR1;TBL1XR1;AGO1;AGO2;E2F3;TBL1X;TNRC6A
PI-3K cascade:FGFR1 Homo sapiens R-HSA-5654689	15/122	6.04035e-06	0.000342287	0	0	3.94706	47.432	GSK3B;SRC;CD80;GAB1;PDGFA;FGF1;FGF4;MOV10;AGO1;AGO2;KIT;PIP5K1B;RICTOR;FGFR2;TNRC6A
PI-3K cascade:FGFR3 Homo sapiens R-HSA-5654710	15/122	6.04035e-06	0.000330062	0	0	3.94706	47.432	GSK3B;SRC;CD80;GAB1;PDGFA;FGF1;FGF4;MOV10;AGO1;AGO2;KIT;PIP5K1B;RICTOR;FGFR2;TNRC6A
PI3K events in ERBB4 signaling Homo sapiens R-HSA-1250342	15/122	6.04035e-06	0.000318681	0	0	3.94706	47.432	GSK3B;SRC;CD80;GAB1;PDGFA;FGF1;FGF4;MOV10;AGO1;AGO2;KIT;PIP5K1B;RICTOR;FGFR2;TNRC6A
PIP3 activates AKT signaling Homo sapiens R-HSA-1257604	15/122	6.04035e-06	0.000308058	0	0	3.94706	47.432	GSK3B;SRC;CD80;GAB1;PDGFA;FGF1;FGF4;MOV10;AGO1;AGO2;KIT;PIP5K1B;RICTOR;FGFR2;TNRC6A
PI-3K cascade:FGFR4 Homo sapiens R-HSA-5654720	15/122	6.04035e-06	0.000298121	0	0	3.94706	47.432	GSK3B;SRC;CD80;GAB1;PDGFA;FGF1;FGF4;MOV10;AGO1;AGO2;KIT;PIP5K1B;RICTOR;FGFR2;TNRC6A
PI-3K cascade:FGFR2 Homo sapiens R-HSA-5654695	15/122	6.04035e-06	0.000288804	0	0	3.94706	47.432	GSK3B;SRC;CD80;GAB1;PDGFA;FGF1;FGF4;MOV10;AGO1;AGO2;KIT;PIP5K1B;RICTOR;FGFR2;TNRC6A
Interleukin-3, 5 and GM-CSF signaling Homo sapiens R-HSA-512988	23/261	7.94196e-06	0.000368218	0	0	2.82898	33.2217	MAP2K1;YES1;KSR1;VWF;SRC;CUL3;FN1;DAB2IP;PDGFA;IQGAP1;IL17RD;FGF1;YWHAZ;CRKL;FGF4;SPRED2;KIT;RAPGEF1;NCAM1;RAF1;SOS1;SPTAN1;FGFR2
GAB1 signalosome Homo sapiens R-HSA-180292	15/125	8.16086e-06	0.000367239	0	0	3.85233	45.1345	GSK3B;SRC;CD80;GAB1;PDGFA;FGF1;FGF4;MOV10;AGO1;AGO2;KIT;PIP5K1B;RICTOR;FGFR2;TNRC6A
PI3K/AKT activation Homo sapiens R-HSA-198203	15/125	8.16086e-06	0.000356746	0	0	3.85233	45.1345	GSK3B;SRC;CD80;GAB1;PDGFA;FGF1;FGF4;MOV10;AGO1;AGO2;KIT;PIP5K1B;RICTOR;FGFR2;TNRC6A
NOTCH1 Intracellular Domain Regulates Transcription Homo sapiens R-HSA-2122947	9/47	1.23218e-05	0.000523677	0	0	6.14733	69.4903	TLE4;NCOR2;CREBBP;NCOR1;MAML2;TBL1XR1;CUL1;TBL1X;RBPJ
Signalling to ERKs Homo sapiens R-HSA-187687	22/253	1.5342e-05	0.000634411	0	0	2.79154	30.944	MAP2K1;KSR1;VWF;SRC;CUL3;FN1;DAB2IP;PDGFA;IQGAP1;IL17RD;FGF1;MAPK14;CRKL;FGF4;SPRED2;KIT;RAPGEF1;NCAM1;RAF1;SOS1;SPTAN1;FGFR2
Signaling by Interleukins Homo sapiens R-HSA-449147	29/392	1.68152e-05	0.000677032	0	0	2.37495	26.1083	SRC;CUL3;CUL1;PDGFA;NOD1;IQGAP1;FGF1;FGF4;CRKL;SPRED2;IRAK2;NCAM1;SPTAN1;MAP2K1;YES1;KSR1;VWF;FN1;DAB2IP;LIFR;IRAK3;IL17RD;YWHAZ;KIT;RAPGEF1;TAB2;SOS1;RAF1;FGFR2
MAP2K and MAPK activation Homo sapiens R-HSA-5674135	8/38	1.81332e-05	0.000711381	0	0	6.75847	73.7874	MAP2K1;VWF;KSR1;SRC;FN1;IQGAP1;IL17RD;RAF1
Frs2-mediated activation Homo sapiens R-HSA-170968	21/240	2.17083e-05	0.000830341	0	0	2.80899	30.1624	MAP2K1;KSR1;VWF;SRC;CUL3;FN1;DAB2IP;PDGFA;IQGAP1;IL17RD;FGF1;CRKL;FGF4;SPRED2;KIT;RAPGEF1;NCAM1;RAF1;SOS1;SPTAN1;FGFR2
Prolonged ERK activation events Homo sapiens R-HSA-169893	21/242	2.45752e-05	0.000917075	0	0	2.78577	29.5676	MAP2K1;KSR1;VWF;SRC;CUL3;FN1;DAB2IP;PDGFA;IQGAP1;IL17RD;FGF1;CRKL;FGF4;SPRED2;KIT;RAPGEF1;NCAM1;RAF1;SOS1;SPTAN1;FGFR2
Diseases of signal transduction Homo sapiens R-HSA-5663202	23/288	3.84285e-05	0.00139989	0	0	2.56376	26.065	SMAD2;GSK3B;CREBBP;HSP90AA1;SMAD3;MAML2;CTBP2;CD80;GAB1;CUL1;PDGFA;RBPJ;FGF1;FGF4;NCOR2;NCOR1;TBL1XR1;KIT;MYO18A;RICTOR;TBL1X;SOS1;FGFR2
IGF1R signaling cascade Homo sapiens R-HSA-2428924	23/288	3.84285e-05	0.00136734	0	0	2.56376	26.065	MAP2K1;KSR1;VWF;SRC;CUL3;FN1;GAB1;DAB2IP;PDGFA;PRKAG2;IQGAP1;IL17RD;FGF1;IGF1R;FGF4;SPRED2;PPM1A;KIT;NCAM1;RAF1;SOS1;SPTAN1;FGFR2
Signaling by Type 1 Insulin-like Growth Factor 1 Receptor (IGF1R) Homo sapiens R-HSA-2404192	23/288	3.84285e-05	0.00133626	0	0	2.56376	26.065	MAP2K1;KSR1;VWF;SRC;CUL3;FN1;GAB1;DAB2IP;PDGFA;PRKAG2;IQGAP1;IL17RD;FGF1;IGF1R;FGF4;SPRED2;PPM1A;KIT;NCAM1;RAF1;SOS1;SPTAN1;FGFR2
IRS-related events triggered by IGF1R Homo sapiens R-HSA-2428928	23/288	3.84285e-05	0.00130657	0	0	2.56376	26.065	MAP2K1;KSR1;VWF;SRC;CUL3;FN1;GAB1;DAB2IP;PDGFA;PRKAG2;IQGAP1;IL17RD;FGF1;IGF1R;FGF4;SPRED2;PPM1A;KIT;NCAM1;RAF1;SOS1;SPTAN1;FGFR2
Signaling by VEGF Homo sapiens R-HSA-194138	25/328	3.90008e-05	0.0012972	0	0	2.44685	24.8403	NRP2;SRC;CUL3;ITPR1;PDGFA;IQGAP1;SHB;FGF1;FGF4;SPRED2;RICTOR;NCAM1;SPTAN1;MAP2K1;HSP90AA1;KSR1;VWF;FN1;DAB2IP;IL17RD;MAPK14;KIT;RAF1;SOS1;FGFR2
Role of LAT2/NTAL/LAB on calcium mobilization Homo sapiens R-HSA-2730905	16/162	4.82491e-05	0.00157066	0	0	3.17064	31.5134	GSK3B;SRC;CD80;GAB1;PDGFA;FGF1;FGF4;MOV10;AGO1;AGO2;KIT;PIP5K1B;RICTOR;SOS1;FGFR2;TNRC6A
Downregulation of SMAD2/3:SMAD4 transcriptional activity Homo sapiens R-HSA-2173795	6/23	5.72277e-05	0.00182413	0	0	8.37462	81.8073	TGIF1;SMAD2;NCOR2;PPM1A;SMAD3;NCOR1
Pre-NOTCH Expression and Processing Homo sapiens R-HSA-1912422	9/57	6.16662e-05	0.0019255	0	0	5.06885	49.1363	MOV10;CREBBP;TFDP1;MAML2;AGO1;AGO2;E2F3;RBPJ;TNRC6A
Innate Immune System Homo sapiens R-HSA-168249	46/807	6.20659e-05	0.00189922	0	0	1.8299	17.7268	ATF1;GSK3B;HSP90AB1;SRC;CUL3;CD80;CUL1;ITPR1;PDGFA;NOD1;IQGAP1;FGF1;FGF4;RELB;SPRED2;IRAK2;RPS6KA2;PIP5K1B;RICTOR;NCAM1;SPTAN1;CREBBP;MAP2K1;HSP90AA1;YES1;KSR1;VWF;FN1;DAB2IP;GAB1;IRAK3;MAPK14;IL17RD;MOV10;AIM2;ARPC2;AGO1;AGO2;KIT;MYH9;TAB2;SOS1;RAF1;UBE2K;TNRC6A;FGFR2
VEGFA-VEGFR2 Pathway Homo sapiens R-HSA-4420097	24/320	7.13631e-05	0.00214089	0	0	2.4077	22.9881	MAP2K1;HSP90AA1;KSR1;VWF;SRC;CUL3;FN1;DAB2IP;ITPR1;PDGFA;IQGAP1;SHB;IL17RD;FGF1;MAPK14;FGF4;SPRED2;KIT;RICTOR;NCAM1;RAF1;SOS1;SPTAN1;FGFR2
IRS-mediated signalling Homo sapiens R-HSA-112399	22/284	8.83e-05	0.00259806	0	0	2.48683	23.214	MAP2K1;KSR1;VWF;SRC;CUL3;FN1;GAB1;DAB2IP;PDGFA;PRKAG2;IQGAP1;IL17RD;FGF1;FGF4;SPRED2;PPM1A;KIT;NCAM1;RAF1;SOS1;SPTAN1;FGFR2
Signalling to RAS Homo sapiens R-HSA-167044	20/246	9.47623e-05	0.00273559	0	0	2.60998	24.1792	MAP2K1;KSR1;VWF;SRC;CUL3;FN1;DAB2IP;PDGFA;IQGAP1;IL17RD;FGF1;MAPK14;FGF4;SPRED2;KIT;NCAM1;RAF1;SOS1;SPTAN1;FGFR2
Insulin receptor signalling cascade Homo sapiens R-HSA-74751	22/287	0.000102931	0.00291637	0	0	2.46084	22.5941	MAP2K1;KSR1;VWF;SRC;CUL3;FN1;GAB1;DAB2IP;PDGFA;PRKAG2;IQGAP1;IL17RD;FGF1;FGF4;SPRED2;PPM1A;KIT;NCAM1;RAF1;SOS1;SPTAN1;FGFR2
VEGFR2 mediated cell proliferation Homo sapiens R-HSA-5218921	20/248	0.000105868	0.00294504	0	0	2.58893	23.6973	MAP2K1;KSR1;VWF;SRC;CUL3;FN1;DAB2IP;ITPR1;PDGFA;IQGAP1;IL17RD;FGF1;FGF4;SPRED2;KIT;NCAM1;RAF1;SOS1;SPTAN1;FGFR2
GRB2 events in EGFR signaling Homo sapiens R-HSA-179812	19/235	0.000151174	0.00413028	0	0	2.59554	22.8332	MAP2K1;KSR1;VWF;SRC;CUL3;FN1;DAB2IP;PDGFA;IQGAP1;IL17RD;FGF1;FGF4;SPRED2;KIT;NCAM1;RAF1;SOS1;SPTAN1;FGFR2
SHC1 events in EGFR signaling Homo sapiens R-HSA-180336	19/235	0.000151174	0.00405782	0	0	2.59554	22.8332	MAP2K1;KSR1;VWF;SRC;CUL3;FN1;DAB2IP;PDGFA;IQGAP1;IL17RD;FGF1;FGF4;SPRED2;KIT;NCAM1;RAF1;SOS1;SPTAN1;FGFR2
SOS-mediated signalling Homo sapiens R-HSA-112412	19/235	0.000151174	0.00398786	0	0	2.59554	22.8332	MAP2K1;KSR1;VWF;SRC;CUL3;FN1;DAB2IP;PDGFA;IQGAP1;IL17RD;FGF1;FGF4;SPRED2;KIT;NCAM1;RAF1;SOS1;SPTAN1;FGFR2
SHC1 events in ERBB4 signaling Homo sapiens R-HSA-1250347	19/235	0.000151174	0.00392027	0	0	2.59554	22.8332	MAP2K1;KSR1;VWF;SRC;CUL3;FN1;DAB2IP;PDGFA;IQGAP1;IL17RD;FGF1;FGF4;SPRED2;KIT;NCAM1;RAF1;SOS1;SPTAN1;FGFR2
RAF/MAP kinase cascade Homo sapiens R-HSA-5673001	19/235	0.000151174	0.00385493	0	0	2.59554	22.8332	MAP2K1;KSR1;VWF;SRC;CUL3;FN1;DAB2IP;PDGFA;IQGAP1;IL17RD;FGF1;FGF4;SPRED2;KIT;NCAM1;RAF1;SOS1;SPTAN1;FGFR2
FRS-mediated FGFR2 signaling Homo sapiens R-HSA-5654700	19/236	0.000159746	0.00400674	0	0	2.58454	22.5939	MAP2K1;KSR1;VWF;SRC;CUL3;FN1;DAB2IP;PDGFA;IQGAP1;IL17RD;FGF1;FGF4;SPRED2;KIT;NCAM1;RAF1;SOS1;SPTAN1;FGFR2
FRS-mediated FGFR4 signaling Homo sapiens R-HSA-5654712	19/236	0.000159746	0.00394211	0	0	2.58454	22.5939	MAP2K1;KSR1;VWF;SRC;CUL3;FN1;DAB2IP;PDGFA;IQGAP1;IL17RD;FGF1;FGF4;SPRED2;KIT;NCAM1;RAF1;SOS1;SPTAN1;FGFR2
FRS-mediated FGFR3 signaling Homo sapiens R-HSA-5654706	19/236	0.000159746	0.00387954	0	0	2.58454	22.5939	MAP2K1;KSR1;VWF;SRC;CUL3;FN1;DAB2IP;PDGFA;IQGAP1;IL17RD;FGF1;FGF4;SPRED2;KIT;NCAM1;RAF1;SOS1;SPTAN1;FGFR2
FRS-mediated FGFR1 signaling Homo sapiens R-HSA-5654693	19/236	0.000159746	0.00381892	0	0	2.58454	22.5939	MAP2K1;KSR1;VWF;SRC;CUL3;FN1;DAB2IP;PDGFA;IQGAP1;IL17RD;FGF1;FGF4;SPRED2;KIT;NCAM1;RAF1;SOS1;SPTAN1;FGFR2
GP1b-IX-V activation signalling Homo sapiens R-HSA-430116	4/10	0.000168578	0.00396806	0	0	12.8411	111.565	VWF;SRC;RAF1;YWHAZ
ARMS-mediated activation Homo sapiens R-HSA-170984	19/239	0.000188078	0.00435999	0	0	2.5521	21.8936	MAP2K1;KSR1;VWF;SRC;CUL3;FN1;DAB2IP;PDGFA;IQGAP1;IL17RD;FGF1;FGF4;SPRED2;KIT;NCAM1;RAF1;SOS1;SPTAN1;FGFR2
Signalling to p38 via RIT and RIN Homo sapiens R-HSA-187706	19/239	0.000188078	0.00429492	0	0	2.5521	21.8936	MAP2K1;KSR1;VWF;SRC;CUL3;FN1;DAB2IP;PDGFA;IQGAP1;IL17RD;FGF1;FGF4;SPRED2;KIT;NCAM1;RAF1;SOS1;SPTAN1;FGFR2
L1CAM interactions Homo sapiens R-HSA-373760	11/96	0.000196469	0.00442056	0	0	3.67844	31.3955	HSPA8;NRP2;MAP2K1;CSNK2A1;SRC;RPS6KA2;ANK2;NCAM1;ANK3;SPTAN1;SH3GL2
MAPK1/MAPK3 signaling Homo sapiens R-HSA-5684996	19/241	0.000209331	0.00464169	0	0	2.53092	21.4409	MAP2K1;KSR1;VWF;SRC;CUL3;FN1;DAB2IP;PDGFA;IQGAP1;IL17RD;FGF1;FGF4;SPRED2;KIT;NCAM1;RAF1;SOS1;SPTAN1;FGFR2
Signaling by Leptin Homo sapiens R-HSA-2586552	19/243	0.000232659	0.00508525	0	0	2.51009	20.9993	MAP2K1;KSR1;VWF;SRC;CUL3;FN1;DAB2IP;PDGFA;IQGAP1;IL17RD;FGF1;FGF4;SPRED2;KIT;NCAM1;RAF1;SOS1;SPTAN1;FGFR2
Transcriptional Regulation by TP53 Homo sapiens R-HSA-3700989	24/348	0.000255197	0.00549931	0	0	2.21398	18.3173	CREBBP;BRD1;CSNK2A1;CRADD;PRKAG2;HIPK1;MAPK14;COX5A;YWHAZ;GATAD2B;GATAD2A;MOV10;CDK7;TFDP1;AGO1;KAT6A;CHEK1;AGO2;RICTOR;MDM4;CDK13;SGK1;YWHAG;TNRC6A
Interleukin receptor SHC signaling Homo sapiens R-HSA-912526	19/245	0.00025823	0.00548739	0	0	2.4896	20.5682	MAP2K1;KSR1;VWF;SRC;CUL3;FN1;DAB2IP;PDGFA;IQGAP1;IL17RD;FGF1;FGF4;SPRED2;KIT;NCAM1;RAF1;SOS1;SPTAN1;FGFR2
Cytokine Signaling in Immune system Homo sapiens R-HSA-1280215	36/620	0.000273367	0.00572948	0	0	1.86403	15.2938	SRC;CUL3;CUL1;PDGFA;NOD1;IQGAP1;FGF1;FGF4;CRKL;RELB;SPRED2;IRAK2;KPNA7;NCAM1;ARIH1;SPTAN1;EGR1;MAP2K1;YES1;KSR1;VWF;FN1;DAB2IP;LIFR;IRAK3;IL17RD;MID1;YWHAZ;PPM1B;KIT;RAPGEF1;TAB2;SOS1;RAF1;PTPN2;FGFR2
Signaling by Insulin receptor Homo sapiens R-HSA-74752	22/311	0.000321286	0.00664281	0	0	2.27093	18.2655	MAP2K1;KSR1;VWF;SRC;CUL3;FN1;GAB1;DAB2IP;PDGFA;PRKAG2;IQGAP1;IL17RD;FGF1;FGF4;SPRED2;PPM1A;KIT;NCAM1;RAF1;SOS1;SPTAN1;FGFR2
Downstream signaling events of B Cell Receptor (BCR) Homo sapiens R-HSA-1168372	16/192	0.000350738	0.00715505	0	0	2.67523	21.2827	GSK3B;SRC;CD80;CUL1;GAB1;PDGFA;FGF1;FGF4;MOV10;AGO1;AGO2;KIT;PIP5K1B;RICTOR;FGFR2;TNRC6A
Constitutive Signaling by NOTCH1 HD+PEST Domain Mutants Homo sapiens R-HSA-2894862	8/57	0.000364394	0.00733582	0	0	4.50565	35.6724	NCOR2;CREBBP;NCOR1;MAML2;TBL1XR1;CUL1;TBL1X;RBPJ
Signaling by NOTCH1 in Cancer Homo sapiens R-HSA-2644603	8/57	0.000364394	0.00724055	0	0	4.50565	35.6724	NCOR2;CREBBP;NCOR1;MAML2;TBL1XR1;CUL1;TBL1X;RBPJ
Signaling by NOTCH1 PEST Domain Mutants in Cancer Homo sapiens R-HSA-2644602	8/57	0.000364394	0.00714772	0	0	4.50565	35.6724	NCOR2;CREBBP;NCOR1;MAML2;TBL1XR1;CUL1;TBL1X;RBPJ
Constitutive Signaling by NOTCH1 PEST Domain Mutants Homo sapiens R-HSA-2644606	8/57	0.000364394	0.00705724	0	0	4.50565	35.6724	NCOR2;CREBBP;NCOR1;MAML2;TBL1XR1;CUL1;TBL1X;RBPJ
Signaling by NOTCH1 HD+PEST Domain Mutants in Cancer Homo sapiens R-HSA-2894858	8/57	0.000364394	0.00696903	0	0	4.50565	35.6724	NCOR2;CREBBP;NCOR1;MAML2;TBL1XR1;CUL1;TBL1X;RBPJ
Interleukin-2 signaling Homo sapiens R-HSA-451927	19/252	0.00036808	0.00695262	0	0	2.42044	19.139	MAP2K1;KSR1;VWF;SRC;CUL3;FN1;DAB2IP;PDGFA;IQGAP1;IL17RD;FGF1;FGF4;SPRED2;KIT;NCAM1;RAF1;SOS1;SPTAN1;FGFR2
Signaling by NOTCH1 Homo sapiens R-HSA-1980143	9/72	0.000385671	0.00719605	0	0	4.01284	31.543	TLE4;NCOR2;CREBBP;NCOR1;MAML2;TBL1XR1;CUL1;TBL1X;RBPJ
Transcriptional activity of SMAD2/SMAD3:SMAD4 heterotrimer Homo sapiens R-HSA-2173793	7/44	0.000386916	0.00713231	0	0	5.10725	40.1292	TGIF1;SMAD2;NCOR2;PPM1A;SMAD3;TFDP1;NCOR1
Signaling by the B Cell Receptor (BCR) Homo sapiens R-HSA-983705	18/233	0.000389246	0.00708985	0	0	2.48004	19.4715	GSK3B;SRC;CD80;GAB1;CUL1;ITPR1;PDGFA;FGF1;FGF4;MOV10;AGO1;AGO2;KIT;PIP5K1B;RICTOR;SOS1;FGFR2;TNRC6A
Signaling by Wnt Homo sapiens R-HSA-195721	21/295	0.000400912	0.00721642	0	0	2.28528	17.8749	TLE4;GSK3B;CREBBP;TCF7L1;CSNK2A1;CTBP2;SMURF1;CUL3;CHD8;CLTC;CUL1;ITPR1;YWHAZ;MOV10;AGO1;GNG7;AGO2;PIP5K1B;ROR2;LGR4;TNRC6A
Nephrin interactions Homo sapiens R-HSA-373753	5/22	0.000489234	0.00870382	0	0	7.29607	55.6156	KIRREL3;ACTN4;IQGAP1;SPTAN1;CD2AP
MAP kinase activation in TLR cascade Homo sapiens R-HSA-450294	8/60	0.000519971	0.00914431	0	0	4.28036	32.367	ATF1;MAP2K1;IRAK2;RPS6KA2;CUL1;NOD1;TAB2;MAPK14
Uptake and function of diphtheria toxin Homo sapiens R-HSA-5336415	3/6	0.000560734	0.00974912	0	0	16.0514	120.165	HSP90AA1;HSP90AB1;EEF2
EPHA-mediated growth cone collapse Homo sapiens R-HSA-3928663	6/34	0.000569816	0.00979571	0	0	5.66519	42.3201	EPHA4;HSP90AA1;YES1;SRC;MYH9;SHB
NCAM signaling for neurite out-growth Homo sapiens R-HSA-375165	19/266	0.000714177	0.012141	0	0	2.29305	16.6117	MAP2K1;KSR1;VWF;SRC;CUL3;FN1;DAB2IP;PDGFA;IQGAP1;IL17RD;FGF1;FGF4;SPRED2;KIT;NCAM1;RAF1;SOS1;SPTAN1;FGFR2
Signal Transduction Homo sapiens R-HSA-162582	104/2465	0.000729722	0.012269	0	0	1.35444	9.78288	ATF1;DGKG;MAML2;CD80;WWC1;RBPJ;FGF1;CDC14A;ARHGAP35;FGF4;CRKL;IGF1R;HHAT;CCND3;RPS6KA2;CHEK1;SH3GL2;TLE4;MAP2K1;CSNK2A1;STARD8;TIAM1;TBL1XR1;ROR2;RAF1;CTBP2;CUL3;CUL1;ITPR1;PDGFA;ARHGAP17;IQGAP1;RTN4;ABR;PDGFC;PIP5K1B;RHPN2;SRGAP3;SMAD2;CREBBP;YES1;SMAD3;SMURF1;FN1;MEMO1;ARHGAP23;MOV10;ARPC2;AGO1;AGO2;TAB2;FGFR2;BMPR1A;GSK3B;NRP2;CHD8;CLTC;PRKAG2;PTPRK;SHB;ARHGAP5;SPRED2;SPTAN1;YWHAG;TGIF1;HSP90A…
EPH-Ephrin signaling Homo sapiens R-HSA-2682334	10/95	0.000749529	0.012465	0	0	3.37923	24.3172	EPHA4;TIAM1;HSP90AA1;YES1;ARPC2;SRC;LIMK2;CLTC;MYH9;SHB
Mitochondrial biogenesis Homo sapiens R-HSA-1592230	7/49	0.000758349	0.0124761	0	0	4.5861	32.9483	CREBBP;NCOR1;TBL1XR1;PRKAG2;NRF1;TBL1X;MAPK14
Transcriptional regulation of white adipocyte differentiation Homo sapiens R-HSA-381340	9/79	0.000769338	0.0125222	0	0	3.65727	26.2226	NCOR2;CCND3;CREBBP;NCOR1;TBL1XR1;NCOA3;EBF1;TBL1X;MED13L
Post-transcriptional silencing by small RNAs Homo sapiens R-HSA-426496	3/7	0.000958576	0.0154381	0	0	13.7583	95.6211	AGO1;AGO2;TNRC6A
GRB2:SOS provides linkage to MAPK signaling for Integrins Homo sapiens R-HSA-354194	4/15	0.000967662	0.0154221	0	0	8.56073	59.4168	VWF;SRC;FN1;SOS1
PI5P, PP2A and IER3 Regulate PI3K/AKT Signaling Homo sapiens R-HSA-6811558	9/83	0.00110097	0.0173658	0	0	3.48102	23.7112	SRC;CD80;KIT;GAB1;PDGFA;PIP5K1B;FGF1;FGFR2;FGF4
Attenuation phase Homo sapiens R-HSA-3371568	5/26	0.00110256	0.0172135	0	0	6.1736	42.043	HSPA8;CREBBP;HSP90AA1;HSP90AB1;TNFRSF21
Regulation of KIT signaling Homo sapiens R-HSA-1433559	4/16	0.00125863	0.0194516	0	0	8.02568	53.5933	YES1;SRC;KIT;SOS1
PI3K/AKT Signaling in Cancer Homo sapiens R-HSA-2219528	9/86	0.00141875	0.0217069	0	0	3.35959	22.0321	GSK3B;CD80;KIT;GAB1;PDGFA;RICTOR;FGF1;FGFR2;FGF4
Immune System Homo sapiens R-HSA-168256	69/1547	0.00159385	0.0241445	0	0	1.43186	9.22348	ATF1;TRIM71;GSK3B;HSP90AB1;CD80;CLTC;PTPRJ;FGF1;FGF4;CRKL;SPRED2;AP1G1;RPS6KA2;KPNA7;ARIH1;SPTAN1;SH3GL2;MAP2K1;HSP90AA1;KSR1;VWF;GAB1;LIFR;IRAK3;IL17RD;MID1;YWHAZ;TRAIP;ENAH;PPM1B;AIM2;UBE2R2;KIT;RAPGEF1;MYH9;SOS1;RAF1;SRC;CUL3;CUL1;ITPR1;PDGFA;NOD1;IQGAP1;RELB;IRAK2;PIP5K1B;RICTOR;NCAM1;RAP1GAP2;EGR1;CREBBP;YES1;SMURF1;FN1;DAB2IP;LNPEP;MAPK14;MOV10;ARPC2;AGO1;AGO2;TRIP12;TAB2;UBE2K;PTPN2;TNRC6A…
activated TAK1 mediates p38 MAPK activation Homo sapiens R-HSA-450302	4/17	0.00160566	0.0240849	0	0	7.55358	48.6014	IRAK2;NOD1;TAB2;MAPK14
TRAF6 Mediated Induction of proinflammatory cytokines Homo sapiens R-HSA-168180	8/72	0.00175614	0.0260864	0	0	3.56697	22.6311	ATF1;MAP2K1;IRAK2;RPS6KA2;CUL1;NOD1;TAB2;MAPK14
FCERI mediated MAPK activation Homo sapiens R-HSA-2871796	19/289	0.00188447	0.0277235	0	0	2.11056	13.2419	MAP2K1;KSR1;VWF;SRC;CUL3;FN1;DAB2IP;PDGFA;IQGAP1;IL17RD;FGF1;FGF4;SPRED2;KIT;NCAM1;RAF1;SOS1;SPTAN1;FGFR2
Signaling by TGF-beta Receptor Complex Homo sapiens R-HSA-170834	8/73	0.00191961	0.0279715	0	0	3.51811	22.008	TGIF1;NCOR2;SMAD2;PPM1A;NCOR1;TFDP1;SMAD3;SMURF1
Negative regulation of the PI3K/AKT network Homo sapiens R-HSA-199418	9/90	0.00195301	0.0281896	0	0	3.21027	20.0269	SRC;CD80;KIT;GAB1;PDGFA;PIP5K1B;FGF1;FGFR2;FGF4
Oxidative Stress Induced Senescence Homo sapiens R-HSA-2559580	9/91	0.00210891	0.0301554	0	0	3.175	19.563	MOV10;TFDP1;PHC1;EED;AGO1;E2F3;MAPK14;TNRC6A;MAP4K4
MyD88:Mal cascade initiated on plasma membrane Homo sapiens R-HSA-166058	9/92	0.00227456	0.032223	0	0	3.14048	19.1129	ATF1;MAP2K1;IRAK2;RPS6KA2;CUL1;IRAK3;NOD1;TAB2;MAPK14
Toll Like Receptor TLR1:TLR2 Cascade Homo sapiens R-HSA-168179	9/92	0.00227456	0.0319273	0	0	3.14048	19.1129	ATF1;MAP2K1;IRAK2;RPS6KA2;CUL1;IRAK3;NOD1;TAB2;MAPK14
Toll Like Receptor TLR6:TLR2 Cascade Homo sapiens R-HSA-168188	9/92	0.00227456	0.0316371	0	0	3.14048	19.1129	ATF1;MAP2K1;IRAK2;RPS6KA2;CUL1;IRAK3;NOD1;TAB2;MAPK14
Toll Like Receptor 2 (TLR2) Cascade Homo sapiens R-HSA-181438	9/92	0.00227456	0.0313521	0	0	3.14048	19.1129	ATF1;MAP2K1;IRAK2;RPS6KA2;CUL1;IRAK3;NOD1;TAB2;MAPK14
Interleukin-1 signaling Homo sapiens R-HSA-446652	6/44	0.00229914	0.0314079	0	0	4.37764	26.5952	MAP2K1;IRAK2;CUL1;NOD1;IRAK3;TAB2
Signaling by ERBB2 Homo sapiens R-HSA-1227986	6/45	0.00258423	0.03499	0	0	4.28036	25.5038	HSP90AA1;YES1;SRC;GAB1;MEMO1;SOS1
Signaling by Rho GTPases Homo sapiens R-HSA-194315	22/367	0.002751	0.0369214	0	0	1.92441	11.3459	PPP1R12A;KDM4C;SRC;STARD8;LIMK2;ARHGAP17;IQGAP1;ARHGAP5;YWHAZ;ARHGAP35;ARHGAP23;TIAM1;ABR;FMNL2;ARPC2;ARHGEF3;MYH9;RHPN2;SRGAP3;SOS1;YWHAG;PAFAH1B1
Regulation of TP53 Activity Homo sapiens R-HSA-5633007	12/151	0.0027597	0.036716	0	0	2.55121	15.0333	BRD1;CSNK2A1;KAT6A;CHEK1;PRKAG2;MDM4;RICTOR;SGK1;HIPK1;MAPK14;GATAD2B;GATAD2A
Constitutive Signaling by Aberrant PI3K in Cancer Homo sapiens R-HSA-2219530	7/61	0.00279444	0.0368576	0	0	3.68392	21.6619	CD80;KIT;GAB1;PDGFA;FGF1;FGFR2;FGF4
Ca2+ pathway Homo sapiens R-HSA-4086398	7/61	0.00279444	0.0365426	0	0	3.68392	21.6619	MOV10;TCF7L1;GNG7;AGO1;AGO2;ITPR1;TNRC6A
Oncogene Induced Senescence Homo sapiens R-HSA-2559585	5/32	0.00289439	0.0375289	0	0	5.01605	29.3187	MOV10;TFDP1;AGO1;E2F3;TNRC6A
Nucleotide-binding domain, leucine rich repeat containing receptor (NLR) signaling pathways Homo sapiens R-HSA-168643	6/47	0.00323298	0.0415669	0	0	4.09822	23.5006	HSP90AB1;AIM2;IRAK2;NOD1;TAB2;MAPK14
HSF1-dependent transactivation Homo sapiens R-HSA-3371571	5/34	0.00380028	0.0484535	0	0	4.72099	26.3086	HSPA8;CREBBP;HSP90AA1;HSP90AB1;TNFRSF21
Toll Like Receptor 10 (TLR10) Cascade Homo sapiens R-HSA-168142	8/82	0.0039915	0.0504711	0	0	3.13197	17.2997	ATF1;MAP2K1;IRAK2;RPS6KA2;CUL1;NOD1;TAB2;MAPK14
Toll Like Receptor 5 (TLR5) Cascade Homo sapiens R-HSA-168176	8/82	0.0039915	0.0500574	0	0	3.13197	17.2997	ATF1;MAP2K1;IRAK2;RPS6KA2;CUL1;NOD1;TAB2;MAPK14
MyD88 cascade initiated on plasma membrane Homo sapiens R-HSA-975871	8/82	0.0039915	0.0496504	0	0	3.13197	17.2997	ATF1;MAP2K1;IRAK2;RPS6KA2;CUL1;NOD1;TAB2;MAPK14
TRAF6 mediated induction of NFkB and MAP kinases upon TLR7/8 or 9 activation Homo sapiens R-HSA-975138	8/83	0.00429983	0.0530543	0	0	3.09424	16.8611	ATF1;MAP2K1;IRAK2;RPS6KA2;CUL1;NOD1;TAB2;MAPK14
Signaling by FGFR3 point mutants in cancer Homo sapiens R-HSA-8853338	4/22	0.0043623	0.0533946	0	0	5.83686	31.7219	GAB1;FGF1;SOS1;FGF4
Signaling by FGFR3 in disease Homo sapiens R-HSA-5655332	4/22	0.0043623	0.0529708	0	0	5.83686	31.7219	GAB1;FGF1;SOS1;FGF4
TP53 Regulates Metabolic Genes Homo sapiens R-HSA-5628897	8/84	0.00462615	0.0557324	0	0	3.0574	16.4367	MOV10;AGO1;AGO2;PRKAG2;YWHAZ;COX5A;YWHAG;TNRC6A
Rho GTPase cycle Homo sapiens R-HSA-194840	10/122	0.00485636	0.0580487	0	0	2.63137	14.0185	TIAM1;ABR;STARD8;ARHGEF3;ARHGAP17;SRGAP3;ARHGAP5;SOS1;ARHGAP35;ARHGAP23
MyD88 dependent cascade initiated on endosome Homo sapiens R-HSA-975155	8/85	0.00497115	0.0589601	0	0	3.02143	16.026	ATF1;MAP2K1;IRAK2;RPS6KA2;CUL1;NOD1;TAB2;MAPK14
Toll Like Receptor 7/8 (TLR7/8) Cascade Homo sapiens R-HSA-168181	8/85	0.00497115	0.0585066	0	0	3.02143	16.026	ATF1;MAP2K1;IRAK2;RPS6KA2;CUL1;NOD1;TAB2;MAPK14
Regulation of TP53 Activity through Acetylation Homo sapiens R-HSA-6804758	4/23	0.00515242	0.0601772	0	0	5.58308	29.4133	BRD1;KAT6A;GATAD2B;GATAD2A
Adaptive Immune System Homo sapiens R-HSA-1280218	37/762	0.00529509	0.061375	0	0	1.55879	8.1696	TRIM71;GSK3B;SRC;CUL3;CD80;CLTC;CUL1;ITPR1;PDGFA;PTPRJ;FGF1;FGF4;AP1G1;PIP5K1B;RICTOR;SH3GL2;RAP1GAP2;YES1;SMURF1;GAB1;LNPEP;YWHAZ;TRAIP;ENAH;MOV10;UBE2R2;AGO1;AGO2;KIT;TRIP12;TAB2;SOS1;RAF1;UBE2K;TNRC6A;FGFR2;RNF220
Chk1/Chk2(Cds1) mediated inactivation of Cyclin B:Cdk1 complex Homo sapiens R-HSA-75035	3/12	0.00536268	0.061691	0	0	8.02568	41.9606	CHEK1;YWHAZ;YWHAG
PECAM1 interactions Homo sapiens R-HSA-210990	3/12	0.00536268	0.0612306	0	0	8.02568	41.9606	YES1;SRC;PECAM1
Cellular responses to stress Homo sapiens R-HSA-2262752	21/367	0.0057527	0.0651972	0	0	1.83694	9.4751	HSPA8;GSK3B;CREBBP;HSP90AA1;ANAPC15;PHC1;HSP90AB1;EED;PRKAG2;WDR45;MAPK14;EEF1A1;MOV10;TFDP1;RPS6KA2;AGO1;ULK1;E2F3;TNFRSF21;TNRC6A;MAP4K4
Platelet activation, signaling and aggregation Homo sapiens R-HSA-76002	16/253	0.0060043	0.0675484	0	0	2.03021	10.3851	DGKG;SPARC;VWF;SRC;FN1;ITPR1;PDGFA;ACTN4;MAPK14;YWHAZ;TTN;GNG7;PECAM1;CDC37L1;RAF1;SOS1
Toll Like Receptor 9 (TLR9) Cascade Homo sapiens R-HSA-168138	8/88	0.00612499	0.0684032	0	0	2.91843	14.8705	ATF1;MAP2K1;IRAK2;RPS6KA2;CUL1;NOD1;TAB2;MAPK14
G1 Phase Homo sapiens R-HSA-69236	5/38	0.00619131	0.0686428	0	0	4.22404	21.4776	CCND3;CDK7;TFDP1;CUL1;E2F3
Cyclin D associated events in G1 Homo sapiens R-HSA-69231	5/38	0.00619131	0.068149	0	0	4.22404	21.4776	CCND3;CDK7;TFDP1;CUL1;E2F3
Signaling by FGFR1 in disease Homo sapiens R-HSA-5655302	5/38	0.00619131	0.0676622	0	0	4.22404	21.4776	MYO18A;GAB1;FGF1;SOS1;FGF4
HATs acetylate histones Homo sapiens R-HSA-3214847	9/107	0.0062383	0.0676922	0	0	2.70023	13.7092	CREBBP;BRD1;ZZZ3;TADA2A;KANSL1;KAT6B;KAT6A;EPC1;TAF5L
Activation of anterior HOX genes in hindbrain development during early embryogenesis Homo sapiens R-HSA-5617472	8/89	0.00655152	0.0705903	0	0	2.88564	14.5092	CREBBP;NCOR1;EED;NCOA3;KMT2C;PKNOX1;PIAS2;KDM6A
Activation of HOX genes during differentiation Homo sapiens R-HSA-5619507	8/89	0.00655152	0.0700966	0	0	2.88564	14.5092	CREBBP;NCOR1;EED;NCOA3;KMT2C;PKNOX1;PIAS2;KDM6A
NICD traffics to nucleus Homo sapiens R-HSA-157052	3/13	0.00681169	0.0723742	0	0	7.40832	36.961	CREBBP;MAML2;RBPJ
Notch-HLH transcription pathway Homo sapiens R-HSA-350054	3/13	0.00681169	0.071875	0	0	7.40832	36.961	CREBBP;MAML2;RBPJ
FGFR2c ligand binding and activation Homo sapiens R-HSA-190375	3/13	0.00681169	0.0713827	0	0	7.40832	36.961	FGF1;FGFR2;FGF4
RAF activation Homo sapiens R-HSA-5673000	4/25	0.007008	0.0729404	0	0	5.13644	25.4803	MAP2K1;KSR1;SRC;RAF1
Regulation of cholesterol biosynthesis by SREBP (SREBF) Homo sapiens R-HSA-1655829	6/55	0.00708418	0.0732352	0	0	3.50212	17.3351	CREBBP;TBL1XR1;SCAP;ELOVL6;TBL1X;ACACB
PKMTs methylate histone lysines Homo sapiens R-HSA-3214841	5/40	0.00771433	0.0792142	0	0	4.01284	19.5212	EED;KMT2C;PRDM16;SETD1A;SMYD3
Transcriptional activation of mitochondrial biogenesis Homo sapiens R-HSA-2151201	5/40	0.00771433	0.0786861	0	0	4.01284	19.5212	CREBBP;NCOR1;TBL1XR1;NRF1;TBL1X
MAPK6/MAPK4 signaling Homo sapiens R-HSA-5687128	8/92	0.00796656	0.0807207	0	0	2.79154	13.4901	MOV10;CCND3;NCOA3;AGO1;AGO2;IGF2BP1;CDC14A;TNRC6A
SHC-mediated cascade:FGFR2 Homo sapiens R-HSA-5654699	4/26	0.00808172	0.0813489	0	0	4.93888	23.7963	FGF1;SOS1;FGFR2;FGF4
Fatty acid, triacylglycerol, and ketone body metabolism Homo sapiens R-HSA-535734	14/217	0.00828996	0.0828996	0	0	2.07114	9.92639	CREBBP;AGK;NCOA3;ACSL6;PRKAG2;ELOVL6;NRF1;ACACB;MED13L;NCOR2;NCOR1;TBL1XR1;TBL1X;TNFRSF21
Activated TLR4 signalling Homo sapiens R-HSA-166054	9/112	0.00834718	0.0829298	0	0	2.57968	12.3459	ATF1;MAP2K1;IRAK2;RPS6KA2;CUL1;TAB2;IRAK3;NOD1;MAPK14
Repression of WNT target genes Homo sapiens R-HSA-4641265	3/14	0.00847103	0.0836173	0	0	6.87916	32.8212	TLE4;TCF7L1;CTBP2
Gastrin-CREB signalling pathway via PKC and MAPK Homo sapiens R-HSA-881907	23/432	0.00919575	0.0901891	0	0	1.70917	8.01434	DGKG;MAP2K1;KSR1;VWF;SRC;CUL3;FN1;DAB2IP;ITPR1;PDGFA;IQGAP1;FGF1;IL17RD;FGF4;SPRED2;RPS6KA2;GNG7;KIT;NCAM1;SOS1;RAF1;SPTAN1;FGFR2
Uptake and actions of bacterial toxins Homo sapiens R-HSA-5339562	4/27	0.00925787	0.09022	0	0	4.75596	22.2687	HSP90AA1;MAP2K1;HSP90AB1;EEF2
Integrin alphaIIb beta3 signaling Homo sapiens R-HSA-354192	4/27	0.00925787	0.089649	0	0	4.75596	22.2687	VWF;SRC;FN1;SOS1
RORA activates gene expression Homo sapiens R-HSA-1368082	4/27	0.00925787	0.0890852	0	0	4.75596	22.2687	CREBBP;NCOR1;TBL1XR1;TBL1X
EPHB-mediated forward signaling Homo sapiens R-HSA-3928662	5/42	0.00947991	0.0906516	0	0	3.82175	17.8039	TIAM1;YES1;ARPC2;SRC;LIMK2
Activation of gene expression by SREBF (SREBP) Homo sapiens R-HSA-2426168	5/42	0.00947991	0.0900886	0	0	3.82175	17.8039	CREBBP;TBL1XR1;ELOVL6;TBL1X;ACACB
Epigenetic regulation of gene expression Homo sapiens R-HSA-212165	9/115	0.00984924	0.0930206	0	0	2.51239	11.6081	GSK3B;CDK7;EED;UHRF1;DNMT3A;TET2;JARID2;GATAD2B;GATAD2A
Signaling by EGFRvIII in Cancer Homo sapiens R-HSA-5637812	3/15	0.0103469	0.097121	0	0	6.42055	29.3488	HSP90AA1;GAB1;SOS1
Constitutive Signaling by EGFRvIII Homo sapiens R-HSA-5637810	3/15	0.0103469	0.0965288	0	0	6.42055	29.3488	HSP90AA1;GAB1;SOS1
p130Cas linkage to MAPK signaling for integrins Homo sapiens R-HSA-372708	3/15	0.0103469	0.0959438	0	0	6.42055	29.3488	VWF;SRC;FN1
Regulation of lipid metabolism by Peroxisome proliferator-activated receptor alpha (PPARalpha) Homo sapiens R-HSA-400206	9/116	0.0103926	0.0957871	0	0	2.49073	11.3743	NCOR2;CREBBP;NCOR1;TBL1XR1;NCOA3;NRF1;TBL1X;TNFRSF21;MED13L
Signaling by FGFR2 in disease Homo sapiens R-HSA-5655253	5/43	0.0104591	0.0958225	0	0	3.73288	17.023	GAB1;FGF1;SOS1;FGFR2;FGF4
HDACs deacetylate histones Homo sapiens R-HSA-3214815	6/60	0.0107442	0.0978489	0	0	3.21027	14.5534	NCOR2;NCOR1;TBL1XR1;TBL1X;GATAD2B;GATAD2A
MyD88-independent TLR3/TLR4 cascade Homo sapiens R-HSA-166166	8/97	0.0108185	0.097943	0	0	2.64765	11.9846	ATF1;MAP2K1;IRAK2;RPS6KA2;CUL1;TAB2;NOD1;MAPK14
Toll Like Receptor 3 (TLR3) Cascade Homo sapiens R-HSA-168164	8/97	0.0108185	0.0973669	0	0	2.64765	11.9846	ATF1;MAP2K1;IRAK2;RPS6KA2;CUL1;TAB2;NOD1;MAPK14
TRIF-mediated TLR3/TLR4 signaling Homo sapiens R-HSA-937061	8/97	0.0108185	0.0967975	0	0	2.64765	11.9846	ATF1;MAP2K1;IRAK2;RPS6KA2;CUL1;TAB2;NOD1;MAPK14
HSF1 activation Homo sapiens R-HSA-3371511	4/29	0.0119316	0.106135	0	0	4.42796	19.6095	EEF1A1;HSP90AA1;HSP90AB1;TNFRSF21
YAP1- and WWTR1 (TAZ)-stimulated gene expression Homo sapiens R-HSA-2032785	4/29	0.0119316	0.105522	0	0	4.42796	19.6095	CREBBP;TBL1XR1;TBL1X;HIPK1
Disease Homo sapiens R-HSA-1643685	34/725	0.0120021	0.105536	0	0	1.50551	6.65837	GSK3B;HSP90AB1;MAML2;CTBP2;CD80;CUL1;PDGFA;RBPJ;FGF1;ACACB;FGF4;AP1G1;MYO18A;KPNA7;RICTOR;TBL1X;SMAD2;CREBBP;MAP2K1;HSP90AA1;RNGTT;SMAD3;IDH1;C1GALT1;GAB1;RPSA;EEF2;NCOR2;CDK7;NCOR1;TBL1XR1;KIT;SOS1;FGFR2
Cellular Senescence Homo sapiens R-HSA-2559583	11/161	0.0122171	0.106812	0	0	2.19335	9.66155	MOV10;ANAPC15;PHC1;TFDP1;EED;RPS6KA2;AGO1;E2F3;MAPK14;TNRC6A;MAP4K4
JNK (c-Jun kinases) phosphorylation and activation mediated by activated human TAK1 Homo sapiens R-HSA-450321	3/16	0.0124442	0.108179	0	0	6.01926	26.4035	IRAK2;NOD1;TAB2
Rap1 signalling Homo sapiens R-HSA-392517	3/16	0.0124442	0.107568	0	0	6.01926	26.4035	RAP1GAP2;RAF1;YWHAZ
Membrane Trafficking Homo sapiens R-HSA-199991	22/420	0.0127255	0.109382	0	0	1.68157	7.33862	ANKRD28;NSF;HSPA8;SRC;COG5;GALNT2;CLTC;PRKAG2;LNPEP;ANK2;AP3B1;ANK3;BICD1;YWHAZ;GJA1;AP1G1;VTI1A;EXOC4;SPTAN1;SH3GL2;YWHAG;PAFAH1B1
Negative feedback regulation of MAPK pathway Homo sapiens R-HSA-5674499	2/6	0.01337	0.11428	0	0	10.7009	46.1717	MAP2K1;RAF1
SMAD2/3 Phosphorylation Motif Mutants in Cancer Homo sapiens R-HSA-3304356	2/6	0.01337	0.113645	0	0	10.7009	46.1717	SMAD2;SMAD3
Signaling by FGFR in disease Homo sapiens R-HSA-1226099	6/63	0.0134918	0.114047	0	0	3.0574	13.1642	MYO18A;GAB1;FGF1;SOS1;FGFR2;FGF4
Toll Like Receptor 4 (TLR4) Cascade Homo sapiens R-HSA-166016	9/122	0.0141382	0.118854	0	0	2.36823	10.086	ATF1;MAP2K1;IRAK2;RPS6KA2;CUL1;TAB2;IRAK3;NOD1;MAPK14
KSRP (KHSRP) binds and destabilizes mRNA Homo sapiens R-HSA-450604	3/17	0.0147667	0.123459	0	0	5.66519	23.8809	EXOSC5;MAPK14;YWHAZ
Activated point mutants of FGFR2 Homo sapiens R-HSA-2033519	3/17	0.0147667	0.122788	0	0	5.66519	23.8809	FGF1;FGFR2;FGF4
RHO GTPases Activate ROCKs Homo sapiens R-HSA-5627117	3/17	0.0147667	0.122125	0	0	5.66519	23.8809	PPP1R12A;LIMK2;MYH9
Beta-catenin independent WNT signaling Homo sapiens R-HSA-3858494	10/144	0.0148223	0.121926	0	0	2.22936	9.3892	MOV10;TCF7L1;SMURF1;AGO1;GNG7;AGO2;CLTC;ITPR1;ROR2;TNRC6A
NOD1/2 Signaling Pathway Homo sapiens R-HSA-168638	4/31	0.0150548	0.123176	0	0	4.14229	17.3813	IRAK2;NOD1;TAB2;MAPK14
EPH-ephrin mediated repulsion of cells Homo sapiens R-HSA-3928665	5/48	0.0163983	0.133454	0	0	3.34403	13.7459	EPHA4;TIAM1;YES1;SRC;CLTC
SMAD2/SMAD3:SMAD4 heterotrimer regulates transcription Homo sapiens R-HSA-2173796	4/32	0.016792	0.135935	0	0	4.01284	16.3999	TGIF1;SMAD2;SMAD3;TFDP1
Signaling by Robo receptor Homo sapiens R-HSA-376176	4/32	0.016792	0.13522	0	0	4.01284	16.3999	ENAH;SRGAP3;SOS1;PAK4
Platelet degranulation Homo sapiens R-HSA-114608	8/105	0.0168578	0.135039	0	0	2.44592	9.98656	SPARC;VWF;FN1;PECAM1;CDC37L1;PDGFA;ACTN4;TTN
SHC-mediated cascade:FGFR3 Homo sapiens R-HSA-5654704	3/18	0.0173173	0.137997	0	0	5.35045	21.7017	FGF1;SOS1;FGF4
Regulation of signaling by CBL Homo sapiens R-HSA-912631	3/18	0.0173173	0.137282	0	0	5.35045	21.7017	YES1;RAPGEF1;CRKL
Semaphorin interactions Homo sapiens R-HSA-373755	6/67	0.0178712	0.140943	0	0	2.87487	11.5701	GSK3B;HSP90AA1;HSP90AB1;LIMK2;MYH9;ARHGAP35
CREB phosphorylation Homo sapiens R-HSA-199920	2/7	0.0183345	0.143856	0	0	9.17221	36.6794	ATF1;RPS6KA2
Loss of Function of TGFBR1 in Cancer Homo sapiens R-HSA-3656534	2/7	0.0183345	0.143122	0	0	9.17221	36.6794	SMAD2;SMAD3
TGFBR1 KD Mutants in Cancer Homo sapiens R-HSA-3656532	2/7	0.0183345	0.142395	0	0	9.17221	36.6794	SMAD2;SMAD3
Loss of Function of SMAD2/3 in Cancer Homo sapiens R-HSA-3304349	2/7	0.0183345	0.141676	0	0	9.17221	36.6794	SMAD2;SMAD3
SMAD2/3 MH2 Domain Mutants in Cancer Homo sapiens R-HSA-3315487	2/7	0.0183345	0.140964	0	0	9.17221	36.6794	SMAD2;SMAD3
CD28 co-stimulation Homo sapiens R-HSA-389356	4/33	0.0186495	0.142669	0	0	3.89124	15.4947	YES1;SRC;CD80;RICTOR
Constitutive Signaling by Ligand-Responsive EGFR Cancer Variants Homo sapiens R-HSA-1236382	3/19	0.0200976	0.152982	0	0	5.06885	19.8048	HSP90AA1;GAB1;SOS1
Signaling by Ligand-Responsive EGFR Variants in Cancer Homo sapiens R-HSA-5637815	3/19	0.0200976	0.152224	0	0	5.06885	19.8048	HSP90AA1;GAB1;SOS1
Signaling by EGFR in Cancer Homo sapiens R-HSA-1643713	3/19	0.0200976	0.151475	0	0	5.06885	19.8048	HSP90AA1;GAB1;SOS1
Negative regulation of FGFR2 signaling Homo sapiens R-HSA-5654727	4/34	0.0206294	0.154721	0	0	3.77679	14.6579	SRC;FGF1;FGFR2;FGF4
Vesicle-mediated transport Homo sapiens R-HSA-5653656	24/492	0.0209071	0.156038	0	0	1.56599	6.05671	ANKRD28;NSF;HSPA8;HSP90AA1;SPARC;SRC;COG5;GALNT2;CLTC;PRKAG2;LNPEP;ANK2;AP3B1;ANK3;BICD1;YWHAZ;GJA1;AP1G1;VTI1A;EXOC4;SPTAN1;SH3GL2;YWHAG;PAFAH1B1
Cell-Cell communication Homo sapiens R-HSA-1500931	9/131	0.0215062	0.159731	0	0	2.20553	8.46794	KIRREL3;CDH4;SRC;LAMC2;ACTN4;IQGAP1;MAPK14;SPTAN1;CD2AP
Response to elevated platelet cytosolic Ca2+ Homo sapiens R-HSA-76005	8/110	0.0216858	0.160286	0	0	2.33474	8.94463	SPARC;VWF;FN1;PECAM1;CDC37L1;PDGFA;ACTN4;TTN
Generic Transcription Pathway Homo sapiens R-HSA-212436	36/812	0.0216987	0.15961	0	0	1.42327	5.45186	MAML2;PRKAG2;RBPJ;COX5A;TRIM28;CHEK1;RICTOR;TBL1X;YWHAG;SMAD2;TGIF1;CREBBP;BRD1;SMAD3;CSNK2A1;CRADD;ESRRB;HIPK1;MAPK14;YWHAZ;GATAD2B;GATAD2A;NCOR2;MOV10;PPM1A;CDK7;NCOR1;TFDP1;TBL1XR1;AGO1;KAT6A;AGO2;MDM4;CDK13;SGK1;TNRC6A
Lysosome Vesicle Biogenesis Homo sapiens R-HSA-432720	4/35	0.0227336	0.166423	0	0	3.66888	13.8827	HSPA8;AP1G1;CLTC;SH3GL2
FGFR2 ligand binding and activation Homo sapiens R-HSA-190241	3/20	0.0231086	0.168363	0	0	4.81541	18.1423	FGF1;FGFR2;FGF4
eNOS activation and regulation Homo sapiens R-HSA-203765	3/20	0.0231086	0.167565	0	0	4.81541	18.1423	LYPLA1;HSP90AA1;NOSIP
Metabolism of nitric oxide Homo sapiens R-HSA-202131	3/20	0.0231086	0.166774	0	0	4.81541	18.1423	LYPLA1;HSP90AA1;NOSIP
Insulin-like Growth Factor-2 mRNA Binding Proteins (IGF2BPs/IMPs/VICKZs) bind RNA Homo sapiens R-HSA-428359	2/8	0.0239466	0.172011	0	0	8.02568	29.9513	IGF2BP1;IGF2BP2
WNT mediated activation of DVL Homo sapiens R-HSA-201688	2/8	0.0239466	0.171207	0	0	8.02568	29.9513	CSNK2A1;PIP5K1B
Signaling by TGF-beta Receptor Complex in Cancer Homo sapiens R-HSA-3304351	2/8	0.0239466	0.170411	0	0	8.02568	29.9513	SMAD2;SMAD3
PPARA activates gene expression Homo sapiens R-HSA-1989781	8/113	0.0250118	0.177167	0	0	2.27276	8.38286	CREBBP;NCOR1;TBL1XR1;NCOA3;NRF1;TBL1X;TNFRSF21;MED13L
Golgi Associated Vesicle Biogenesis Homo sapiens R-HSA-432722	5/54	0.0260493	0.183665	0	0	2.97247	10.8429	HSPA8;AP1G1;CLTC;AP3B1;SH3GL2
Signal transduction by L1 Homo sapiens R-HSA-445144	3/21	0.0263504	0.184936	0	0	4.5861	16.6763	MAP2K1;CSNK2A1;NCAM1
SHC-mediated cascade:FGFR1 Homo sapiens R-HSA-5654688	3/21	0.0263504	0.184092	0	0	4.5861	16.6763	FGF1;SOS1;FGF4
CD209 (DC-SIGN) signaling Homo sapiens R-HSA-5621575	3/21	0.0263504	0.183255	0	0	4.5861	16.6763	CREBBP;RAF1;RELB
Platelet Aggregation (Plug Formation) Homo sapiens R-HSA-76009	4/37	0.0273211	0.189146	0	0	3.47057	12.4944	VWF;SRC;FN1;SOS1
CTLA4 inhibitory signaling Homo sapiens R-HSA-389513	3/22	0.0298222	0.205531	0	0	4.37764	15.3765	YES1;SRC;CD80
Cohesin Loading onto Chromatin Homo sapiens R-HSA-2470946	2/9	0.0301612	0.206936	0	0	7.13394	24.9773	NIPBL;PDS5A
Formation of annular gap junctions Homo sapiens R-HSA-196025	2/9	0.0301612	0.206012	0	0	7.13394	24.9773	GJA1;CLTC
SHC-related events triggered by IGF1R Homo sapiens R-HSA-2428933	2/9	0.0301612	0.205096	0	0	7.13394	24.9773	SOS1;IGF1R
Small interfering RNA (siRNA) biogenesis Homo sapiens R-HSA-426486	2/9	0.0301612	0.204189	0	0	7.13394	24.9773	AGO1;AGO2
Cellular response to heat stress Homo sapiens R-HSA-3371556	7/96	0.0303266	0.204404	0	0	2.34082	8.18289	EEF1A1;GSK3B;HSPA8;HSP90AA1;CREBBP;HSP90AB1;TNFRSF21
Toll-Like Receptors Cascades Homo sapiens R-HSA-168898	9/140	0.0312955	0.210009	0	0	2.06375	7.1494	ATF1;MAP2K1;IRAK2;RPS6KA2;CUL1;TAB2;IRAK3;NOD1;MAPK14
Nuclear signaling by ERBB4 Homo sapiens R-HSA-1251985	4/39	0.0324222	0.21662	0	0	3.29259	11.29	WWOX;NCOR1;CUL1;TAB2
SHC-mediated cascade:FGFR4 Homo sapiens R-HSA-5654719	3/23	0.0335227	0.222999	0	0	4.18731	14.2182	FGF1;SOS1;FGF4
PI3K Cascade Homo sapiens R-HSA-109704	6/79	0.036581	0.24229	0	0	2.43818	8.06606	PPM1A;GAB1;PRKAG2;FGF1;FGFR2;FGF4
Gap junction degradation Homo sapiens R-HSA-190873	2/10	0.0369355	0.243583	0	0	6.42055	21.1787	GJA1;CLTC
Activation of Ca-permeable Kainate Receptor Homo sapiens R-HSA-451308	2/10	0.0369355	0.242538	0	0	6.42055	21.1787	GRIK3;GRIK4
Ionotropic activity of Kainate Receptors Homo sapiens R-HSA-451306	2/10	0.0369355	0.241501	0	0	6.42055	21.1787	GRIK3;GRIK4
Activation of PPARGC1A (PGC-1alpha) by phosphorylation Homo sapiens R-HSA-2151209	2/10	0.0369355	0.240474	0	0	6.42055	21.1787	PRKAG2;MAPK14
IRAK2 mediated activation of TAK1 complex upon TLR7/8 or 9 stimulation Homo sapiens R-HSA-975163	2/10	0.0369355	0.239455	0	0	6.42055	21.1787	IRAK2;TAB2
IRAK2 mediated activation of TAK1 complex Homo sapiens R-HSA-937042	2/10	0.0369355	0.238444	0	0	6.42055	21.1787	IRAK2;TAB2
FGFR2b ligand binding and activation Homo sapiens R-HSA-190377	2/10	0.0369355	0.237442	0	0	6.42055	21.1787	FGF1;FGFR2
Signaling by FGFR3 fusions in cancer Homo sapiens R-HSA-8853334	2/10	0.0369355	0.236449	0	0	6.42055	21.1787	GAB1;SOS1
eNOS activation Homo sapiens R-HSA-203615	2/10	0.0369355	0.235464	0	0	6.42055	21.1787	LYPLA1;HSP90AA1
Nuclear Events (kinase and transcription factor activation) Homo sapiens R-HSA-198725	3/24	0.0374498	0.237752	0	0	4.01284	13.1812	ATF1;RPS6KA2;MAPK14
SUMOylation Homo sapiens R-HSA-2990846	7/101	0.0384183	0.242893	0	0	2.22494	7.25158	RNF168;PHC1;NSMCE2;SP3;TOP1;SAE1;PIAS2
Translocation of GLUT4 to the plasma membrane Homo sapiens R-HSA-1445148	5/60	0.0387264	0.243833	0	0	2.67523	8.69779	EXOC4;PRKAG2;LNPEP;YWHAZ;YWHAG
RHO GTPases activate PKNs Homo sapiens R-HSA-5625740	5/60	0.0387264	0.242833	0	0	2.67523	8.69779	PPP1R12A;KDM4C;MYH9;YWHAZ;YWHAG
Transcriptional regulation of pluripotent stem cells Homo sapiens R-HSA-452723	4/42	0.0410501	0.256354	0	0	3.0574	9.76217	SMAD2;SALL1;TSC22D1;SALL4
Deactivation of the beta-catenin transactivating complex Homo sapiens R-HSA-3769402	4/42	0.0410501	0.255312	0	0	3.0574	9.76217	TLE4;TCF7L1;CHD8;YWHAZ
BMAL1:CLOCK,NPAS2 activates circadian gene expression Homo sapiens R-HSA-1368108	4/42	0.0410501	0.254278	0	0	3.0574	9.76217	CREBBP;NCOR1;TBL1XR1;TBL1X
ADP signalling through P2Y purinoceptor 1 Homo sapiens R-HSA-418592	3/25	0.0416009	0.256651	0	0	3.85233	12.249	SRC;GNG7;MAPK14
Gene Expression Homo sapiens R-HSA-74160	63/1631	0.0441683	0.271395	0	0	1.24002	3.86855	GSK3B;MAML2;PRKAG2;RBPJ;SMG5;TRIM28;SNAPC3;CHEK1;JARID2;YWHAG;TGIF1;BRD1;HSP90AA1;CSNK2A1;EED;DNMT3A;TET2;RPSA;YWHAZ;NCOR2;QTRT1;EEF1A1;PPM1A;NCOR1;TFDP1;TBL1XR1;KAT6A;SGK1;ANP32A;UHRF1;COX5A;EXOSC5;IGF2BP1;RICTOR;IGF2BP2;TBL1X;SRSF11;SMAD2;DARS;HSPA8;CREBBP;RNGTT;SMAD3;POU2F1;CRADD;WTAP;ESRRB;CDC5L;HIPK1;EEF2;MAPK14;ELL2;GATAD2B;GATAD2A;MOV10;CDK7;AGO1;AGO2;EIF3H;MDM4;CDK13;TNRC6A;EIF3A
Import of palmitoyl-CoA into the mitochondrial matrix Homo sapiens R-HSA-200425	2/11	0.0442286	0.270679	0	0	5.83686	18.2016	PRKAG2;ACACB
FGFR1c ligand binding and activation Homo sapiens R-HSA-190373	2/11	0.0442286	0.269601	0	0	5.83686	18.2016	FGF1;FGF4
Signaling by activated point mutants of FGFR1 Homo sapiens R-HSA-1839122	2/11	0.0442286	0.268531	0	0	5.83686	18.2016	FGF1;FGF4
Signaling by FGFR4 in disease Homo sapiens R-HSA-5655291	2/11	0.0442286	0.26747	0	0	5.83686	18.2016	GAB1;SOS1
Recycling pathway of L1 Homo sapiens R-HSA-437239	3/26	0.045973	0.276924	0	0	3.70416	11.4077	SRC;RPS6KA2;SH3GL2
PTK6 Regulates RHO GTPases, RAS GTPase and MAP kinases Homo sapiens R-HSA-8849471	3/26	0.045973	0.275838	0	0	3.70416	11.4077	SPRED2;DAB2IP;ARHGAP35
TAK1 activates NFkB by phosphorylation and activation of IKKs complex Homo sapiens R-HSA-445989	3/26	0.045973	0.274761	0	0	3.70416	11.4077	IRAK2;NOD1;TAB2
Downregulation of TGF-beta receptor signaling Homo sapiens R-HSA-2173788	3/26	0.045973	0.273691	0	0	3.70416	11.4077	SMAD2;SMAD3;SMURF1
Circadian Clock Homo sapiens R-HSA-400253	5/63	0.0462584	0.274323	0	0	2.54784	7.8308	CREBBP;NCOR1;TBL1XR1;CUL1;TBL1X
EGFR downregulation Homo sapiens R-HSA-182971	3/27	0.0505624	0.298689	0	0	3.56697	10.6458	PTPRK;SH3GL2;EPN1
Sema4D in semaphorin signaling Homo sapiens R-HSA-400685	3/27	0.0505624	0.29754	0	0	3.56697	10.6458	LIMK2;MYH9;ARHGAP35
NRAGE signals death through JNK Homo sapiens R-HSA-193648	4/45	0.0508545	0.298113	0	0	2.85358	8.50019	ABR;TIAM1;ARHGEF3;SOS1
NOTCH2 intracellular domain regulates transcription Homo sapiens R-HSA-2197563	2/12	0.0520018	0.303675	0	0	5.35045	15.8185	MAML2;RBPJ
FGFR3 mutant receptor activation Homo sapiens R-HSA-2033514	2/12	0.0520018	0.30252	0	0	5.35045	15.8185	FGF1;FGF4
Signaling by activated point mutants of FGFR3 Homo sapiens R-HSA-1839130	2/12	0.0520018	0.301374	0	0	5.35045	15.8185	FGF1;FGF4
Caspase-mediated cleavage of cytoskeletal proteins Homo sapiens R-HSA-264870	2/12	0.0520018	0.300237	0	0	5.35045	15.8185	MAPT;SPTAN1
Regulation of PLK1 Activity at G2/M Transition Homo sapiens R-HSA-2565942	6/87	0.054211	0.311815	0	0	2.21398	6.45347	PCM1;HSP90AA1;PPP1R12A;CUL1;YWHAG;PAFAH1B1
Platelet homeostasis Homo sapiens R-HSA-418346	6/87	0.054211	0.310647	0	0	2.21398	6.45347	GUCY1A2;GNG7;PECAM1;ITPR1;ATP2B4;MAPK14
Regulation of TP53 Activity through Phosphorylation Homo sapiens R-HSA-6804756	6/89	0.0592991	0.338536	0	0	2.16423	6.1143	CSNK2A1;CHEK1;PRKAG2;MDM4;HIPK1;MAPK14
Mitotic Telophase/Cytokinesis Homo sapiens R-HSA-68884	2/13	0.0602182	0.342505	0	0	4.93888	13.8772	NIPBL;PDS5A
WNT5A-dependent internalization of FZD2, FZD5 and ROR2 Homo sapiens R-HSA-5140745	2/13	0.0602182	0.341237	0	0	4.93888	13.8772	CLTC;ROR2
POU5F1 (OCT4), SOX2, NANOG activate genes related to proliferation Homo sapiens R-HSA-2892247	2/13	0.0602182	0.339977	0	0	4.93888	13.8772	SALL1;SALL4
FGFRL1 modulation of FGFR1 signaling Homo sapiens R-HSA-5658623	2/13	0.0602182	0.338727	0	0	4.93888	13.8772	SPRED2;FGF4
FGFR3c ligand binding and activation Homo sapiens R-HSA-190372	2/13	0.0602182	0.337487	0	0	4.93888	13.8772	FGF1;FGF4
FGFR3 ligand binding and activation Homo sapiens R-HSA-190239	2/13	0.0602182	0.336255	0	0	4.93888	13.8772	FGF1;FGF4
p38MAPK events Homo sapiens R-HSA-171007	2/13	0.0602182	0.335032	0	0	4.93888	13.8772	SRC;MAPK14
Signaling by Activin Homo sapiens R-HSA-1502540	2/13	0.0602182	0.333818	0	0	4.93888	13.8772	SMAD2;SMAD3
Interaction between L1 and Ankyrins Homo sapiens R-HSA-445095	3/29	0.0603767	0.333488	0	0	3.32097	9.32248	ANK2;ANK3;SPTAN1
COPI-independent Golgi-to-ER retrograde traffic Homo sapiens R-HSA-6811436	3/29	0.0603767	0.332289	0	0	3.32097	9.32248	GALNT2;BICD1;PAFAH1B1
Activation of BH3-only proteins Homo sapiens R-HSA-114452	3/29	0.0603767	0.331098	0	0	3.32097	9.32248	TFDP1;YWHAZ;YWHAG
Negative regulation of FGFR3 signaling Homo sapiens R-HSA-5654732	3/29	0.0603767	0.329915	0	0	3.32097	9.32248	SRC;FGF1;FGF4
Gap junction trafficking and regulation Homo sapiens R-HSA-157858	3/30	0.0655923	0.35714	0	0	3.21027	8.74573	GJA1;SRC;CLTC
MAPK targets/ Nuclear events mediated by MAP kinases Homo sapiens R-HSA-450282	3/30	0.0655923	0.355873	0	0	3.21027	8.74573	ATF1;RPS6KA2;MAPK14
Activation of Kainate Receptors upon glutamate binding Homo sapiens R-HSA-451326	3/30	0.0655923	0.354616	0	0	3.21027	8.74573	GNG7;GRIK3;GRIK4
Phospholipase C-mediated cascade; FGFR2 Homo sapiens R-HSA-5654221	4/49	0.0657388	0.354156	0	0	2.62063	7.13353	ITPR1;FGF1;FGFR2;FGF4
Transmission across Chemical Synapses Homo sapiens R-HSA-112315	11/211	0.0667957	0.358587	0	0	1.6736	4.52896	NSF;RIMS1;HSPA8;KCNJ6;EPB41L1;RPS6KA2;GNG7;GRIK3;GRIK4;RAF1;SYN1
trans-Golgi Network Vesicle Budding Homo sapiens R-HSA-199992	5/70	0.0669923	0.358386	0	0	2.29305	6.19853	HSPA8;AP1G1;CLTC;AP3B1;SH3GL2
Clathrin derived vesicle budding Homo sapiens R-HSA-421837	5/70	0.0669923	0.357137	0	0	2.29305	6.19853	HSPA8;AP1G1;CLTC;AP3B1;SH3GL2
FGFR4 ligand binding and activation Homo sapiens R-HSA-190322	2/14	0.0688428	0.365727	0	0	4.5861	12.2721	FGF1;FGF4
DCC mediated attractive signaling Homo sapiens R-HSA-418885	2/14	0.0688428	0.364462	0	0	4.5861	12.2721	ABLIM1;SRC
Activation of Rac Homo sapiens R-HSA-428540	2/14	0.0688428	0.363205	0	0	4.5861	12.2721	SOS1;PAK4
HS-GAG biosynthesis Homo sapiens R-HSA-2022928	3/31	0.0710071	0.373336	0	0	3.10672	8.21719	EXT1;NDST1;HS3ST5
Negative regulation of FGFR4 signaling Homo sapiens R-HSA-5654733	3/31	0.0710071	0.372058	0	0	3.10672	8.21719	SRC;FGF1;FGF4
FGFR1 mutant receptor activation Homo sapiens R-HSA-1839124	3/31	0.0710071	0.370788	0	0	3.10672	8.21719	MYO18A;FGF1;FGF4
Neurotransmitter Receptor Binding And Downstream Transmission In The Postsynaptic Cell Homo sapiens R-HSA-112314	8/142	0.0764674	0.397942	0	0	1.8086	4.64973	NSF;KCNJ6;EPB41L1;RPS6KA2;GNG7;GRIK3;GRIK4;RAF1
Negative regulation of FGFR1 signaling Homo sapiens R-HSA-5654726	3/32	0.0766155	0.397362	0	0	3.00963	7.73161	SRC;FGF1;FGF4
Signal amplification Homo sapiens R-HSA-392518	3/32	0.0766155	0.39602	0	0	3.00963	7.73161	SRC;GNG7;MAPK14
TGF-beta receptor signaling activates SMADs Homo sapiens R-HSA-2173789	3/32	0.0766155	0.394686	0	0	3.00963	7.73161	SMAD2;SMAD3;SMURF1
Activation of BAD and translocation to mitochondria Homo sapiens R-HSA-111447	2/15	0.0778421	0.399659	0	0	4.28036	10.9281	YWHAZ;YWHAG
FGFR1 ligand binding and activation Homo sapiens R-HSA-190242	2/15	0.0778421	0.398323	0	0	4.28036	10.9281	FGF1;FGF4
SUMO E3 ligases SUMOylate target proteins Homo sapiens R-HSA-3108232	6/96	0.0792735	0.404295	0	0	2.00642	5.08598	RNF168;PHC1;NSMCE2;SP3;TOP1;PIAS2
Fcgamma receptor (FCGR) dependent phagocytosis Homo sapiens R-HSA-2029480	7/120	0.0813487	0.4135	0	0	1.87266	4.69852	HSP90AA1;YES1;HSP90AB1;ARPC2;SRC;ITPR1;MYH9
FGFR2 mutant receptor activation Homo sapiens R-HSA-1839126	3/33	0.0824121	0.417518	0	0	2.91843	7.28447	FGF1;FGFR2;FGF4
Smooth Muscle Contraction Homo sapiens R-HSA-445355	3/33	0.0824121	0.416141	0	0	2.91843	7.28447	TPM3;ANXA6;SORBS1
G alpha (12/13) signalling events Homo sapiens R-HSA-416482	5/75	0.0844903	0.425231	0	0	2.14018	5.28864	TIAM1;ABR;GNG7;ARHGEF3;SOS1
Organelle biogenesis and maintenance Homo sapiens R-HSA-1852241	15/326	0.0866764	0.434803	0	0	1.47712	3.6124	CREBBP;HSP90AA1;MRPS31;PRKAG2;IFT80;NRF1;MAPK14;PCM1;NCOR1;TBL1XR1;EXOC4;TBL1X;IFT46;YWHAG;PAFAH1B1
MAP3K8 (TPL2)-dependent MAPK1/3 activation Homo sapiens R-HSA-5684264	2/16	0.0871847	0.435924	0	0	4.01284	9.79023	MAP2K1;CUL1
Sema3A PAK dependent Axon repulsion Homo sapiens R-HSA-399954	2/16	0.0871847	0.434504	0	0	4.01284	9.79023	HSP90AA1;HSP90AB1
C-type lectin receptors (CLRs) Homo sapiens R-HSA-5621481	7/123	0.0899434	0.446797	0	0	1.82698	4.40043	CREBBP;SRC;CUL1;ITPR1;TAB2;RAF1;RELB
TCF dependent signaling in response to WNT Homo sapiens R-HSA-201681	10/199	0.0938732	0.464809	0	0	1.6132	3.81653	TLE4;GSK3B;CREBBP;TCF7L1;CSNK2A1;CUL3;CHD8;PIP5K1B;YWHAZ;LGR4
Regulation of TP53 Degradation Homo sapiens R-HSA-6804757	3/35	0.0945465	0.466633	0	0	2.75166	6.49025	RICTOR;MDM4;SGK1
Cell surface interactions at the vascular wall Homo sapiens R-HSA-202733	6/101	0.0955834	0.470233	0	0	1.90709	4.47739	YES1;SRC;FN1;PECAM1;SOS1;JAM2
COPI-mediated anterograde transport Homo sapiens R-HSA-6807878	5/78	0.0960339	0.470935	0	0	2.05787	4.82169	NSF;COG5;ANK2;ANK3;SPTAN1
G1/S-Specific Transcription Homo sapiens R-HSA-69205	2/17	0.0968405	0.473374	0	0	3.77679	8.81764	TFDP1;TYMS
Platelet sensitization by LDL Homo sapiens R-HSA-432142	2/17	0.0968405	0.471866	0	0	3.77679	8.81764	PECAM1;MAPK14
Inflammasomes Homo sapiens R-HSA-622312	2/17	0.0968405	0.470368	0	0	3.77679	8.81764	HSP90AB1;AIM2
Mitotic G2-G2/M phases Homo sapiens R-HSA-453274	9/175	0.0972648	0.470934	0	0	1.651	3.84735	CDK7;PCM1;HSP90AA1;HSP90AB1;PPP1R12A;CUL1;E2F3;YWHAG;PAFAH1B1
Hemostasis Homo sapiens R-HSA-109582	23/552	0.097404	0.47012	0	0	1.33761	3.11515	DGKG;GUCY1A2;CREBBP;SPARC;YES1;VWF;SRC;FN1;ITPR1;ATP2B4;PDGFA;JMJD1C;ACTN4;MAPK14;YWHAZ;TTN;CAPZB;GNG7;PECAM1;CDC37L1;SOS1;RAF1;JAM2
Regulation of TP53 Expression and Degradation Homo sapiens R-HSA-6806003	3/36	0.100872	0.485329	0	0	2.67523	6.13671	RICTOR;MDM4;SGK1
RHO GTPase Effectors Homo sapiens R-HSA-195258	12/255	0.103059	0.494297	0	0	1.51072	3.43303	PPP1R12A;KDM4C;FMNL2;ARPC2;SRC;LIMK2;MYH9;IQGAP1;RHPN2;YWHAZ;YWHAG;PAFAH1B1
Serotonin Neurotransmitter Release Cycle Homo sapiens R-HSA-181429	2/18	0.106781	0.510546	0	0	3.56697	7.97923	RIMS1;SYN1
Apoptotic cleavage of cellular proteins Homo sapiens R-HSA-111465	3/37	0.107362	0.511726	0	0	2.60292	5.80855	STK24;MAPT;SPTAN1
Degradation of beta-catenin by the destruction complex Homo sapiens R-HSA-195253	5/82	0.112596	0.535004	0	0	1.95748	4.27505	TLE4;GSK3B;TCF7L1;CTBP2;CUL1
p75 NTR receptor-mediated signalling Homo sapiens R-HSA-193704	5/83	0.116938	0.553917	0	0	1.9339	4.15036	TIAM1;ABR;ARHGEF3;SOS1;RTN4
GABA synthesis, release, reuptake and degradation Homo sapiens R-HSA-888590	2/19	0.116979	0.5524	0	0	3.37923	7.25103	HSPA8;RIMS1
Signaling by FGFR2 IIIa TM Homo sapiens R-HSA-8851708	2/19	0.116979	0.550701	0	0	3.37923	7.25103	FGF1;FGFR2
Conversion from APC/C:Cdc20 to APC/C:Cdh1 in late anaphase Homo sapiens R-HSA-176407	2/19	0.116979	0.549011	0	0	3.37923	7.25103	ANAPC15;CDC14A
Signaling by NODAL Homo sapiens R-HSA-1181150	2/19	0.116979	0.547333	0	0	3.37923	7.25103	SMAD2;SMAD3
Cell Cycle Homo sapiens R-HSA-1640170	23/566	0.118328	0.551958	0	0	1.30453	2.78424	HSP90AA1;ANAPC15;HSP90AB1;PPP1R12A;CSNK2A1;CUL1;TYMS;PDS5A;YWHAZ;CDC14A;RNF168;NIPBL;CDK7;PCM1;CCND3;TFDP1;CHEK1;MDM4;E2F3;YWHAG;PAFAH1B1;MCM2;MCPH1
Cell death signalling via NRAGE, NRIF and NADE Homo sapiens R-HSA-204998	4/61	0.122017	0.567435	0	0	2.1051	4.42827	TIAM1;ABR;ARHGEF3;SOS1
PRC2 methylates histones and DNA Homo sapiens R-HSA-212300	3/40	0.127752	0.592307	0	0	2.4077	4.95424	EED;DNMT3A;JARID2
Negative regulation of MAPK pathway Homo sapiens R-HSA-5675221	3/40	0.127752	0.590517	0	0	2.4077	4.95424	MAP2K1;KSR1;RAF1
Regulation of mRNA stability by proteins that bind AU-rich elements Homo sapiens R-HSA-450531	5/86	0.130429	0.601075	0	0	1.86644	3.80179	HSPA8;EXOSC5;ANP32A;MAPK14;YWHAZ
Mitotic G1-G1/S phases Homo sapiens R-HSA-453279	7/136	0.132756	0.609958	0	0	1.65235	3.33649	CCND3;CDK7;TFDP1;CUL1;E2F3;TYMS;MCM2
Cell Cycle, Mitotic Homo sapiens R-HSA-69278	19/462	0.134112	0.614345	0	0	1.32024	2.65247	HSP90AA1;ANAPC15;HSP90AB1;PPP1R12A;CSNK2A1;CUL1;TYMS;PDS5A;CDC14A;NIPBL;CDK7;PCM1;CCND3;TFDP1;E2F3;YWHAG;PAFAH1B1;MCM2;MCPH1
ERK/MAPK targets Homo sapiens R-HSA-198753	2/21	0.138047	0.630482	0	0	3.0574	6.05416	RPS6KA2;MAPK14
RHO GTPases activate PAKs Homo sapiens R-HSA-5627123	2/21	0.138047	0.628606	0	0	3.0574	6.05416	PPP1R12A;MYH9
Presynaptic function of Kainate receptors Homo sapiens R-HSA-500657	2/21	0.138047	0.62674	0	0	3.0574	6.05416	GNG7;GRIK3
Synthesis of very long-chain fatty acyl-CoAs Homo sapiens R-HSA-75876	2/21	0.138047	0.624886	0	0	3.0574	6.05416	ACSL6;ELOVL6
Post-translational protein modification Homo sapiens R-HSA-597592	21/521	0.138507	0.625118	0	0	1.29397	2.55796	CHST8;ANKRD28;NSF;PGAP1;PHC1;COG5;ST8SIA1;GALNT2;NSMCE2;C1GALT1;ANK2;ANK3;EEF2;PIAS2;RNF168;SP3;B3GNT2;PIGL;TOP1;SAE1;SPTAN1
Intrinsic Pathway for Apoptosis Homo sapiens R-HSA-109606	3/42	0.142049	0.63922	0	0	2.29305	4.47508	TFDP1;YWHAZ;YWHAG
Glucagon-like Peptide-1 (GLP1) regulates insulin secretion Homo sapiens R-HSA-381676	3/42	0.142049	0.637346	0	0	2.29305	4.47508	GNG7;ITPR1;IQGAP1
Fatty Acyl-CoA Biosynthesis Homo sapiens R-HSA-75105	3/42	0.142049	0.635482	0	0	2.29305	4.47508	AGK;ACSL6;ELOVL6
Hyaluronan biosynthesis and export Homo sapiens R-HSA-2142850	1/5	0.146358	0.652849	0	0	6.42055	12.3384	CEMIP
SUMO is conjugated to E1 (UBA2:SAE1) Homo sapiens R-HSA-3065676	1/5	0.146358	0.650951	0	0	6.42055	12.3384	SAE1
G2 Phase Homo sapiens R-HSA-68911	1/5	0.146358	0.649065	0	0	6.42055	12.3384	E2F3
Loss of Function of FBXW7 in Cancer and NOTCH1 Signaling Homo sapiens R-HSA-2644607	1/5	0.146358	0.647189	0	0	6.42055	12.3384	CUL1
FBXW7 Mutants and NOTCH1 in Cancer Homo sapiens R-HSA-2644605	1/5	0.146358	0.645324	0	0	6.42055	12.3384	CUL1
LRR FLII-interacting protein 1 (LRRFIP1) activates type I IFN production Homo sapiens R-HSA-3134973	1/5	0.146358	0.643469	0	0	6.42055	12.3384	CREBBP
NGF-independant TRKA activation Homo sapiens R-HSA-187024	1/5	0.146358	0.641626	0	0	6.42055	12.3384	NTRK2
Serotonin and melatonin biosynthesis Homo sapiens R-HSA-209931	1/5	0.146358	0.639792	0	0	6.42055	12.3384	DDC
CD28 dependent PI3K/Akt signaling Homo sapiens R-HSA-389357	2/22	0.148869	0.648917	0	0	2.91843	5.5587	CD80;RICTOR
Intra-Golgi traffic Homo sapiens R-HSA-6811438	3/44	0.156847	0.68175	0	0	2.18882	4.05476	NSF;COG5;VTI1A
Phospholipase C-mediated cascade; FGFR3 Homo sapiens R-HSA-5654227	3/44	0.156847	0.679819	0	0	2.18882	4.05476	ITPR1;FGF1;FGF4
Dopamine Neurotransmitter Release Cycle Homo sapiens R-HSA-212676	2/23	0.159855	0.690897	0	0	2.79154	5.11827	RIMS1;SYN1
MicroRNA (miRNA) biogenesis Homo sapiens R-HSA-203927	2/23	0.159855	0.688951	0	0	2.79154	5.11827	AGO1;AGO2
Signaling by BMP Homo sapiens R-HSA-201451	2/23	0.159855	0.687015	0	0	2.79154	5.11827	SMURF1;BMPR1A
Loss of Nlp from mitotic centrosomes Homo sapiens R-HSA-380259	4/69	0.16785	0.719358	0	0	1.86103	3.32134	PCM1;HSP90AA1;YWHAG;PAFAH1B1
Loss of proteins required for interphase microtubule organization?from the centrosome Homo sapiens R-HSA-380284	4/69	0.16785	0.717349	0	0	1.86103	3.32134	PCM1;HSP90AA1;YWHAG;PAFAH1B1
Sema4D induced cell migration and growth-cone collapse Homo sapiens R-HSA-416572	2/24	0.170982	0.728699	0	0	2.67523	4.72497	LIMK2;MYH9
Insulin processing Homo sapiens R-HSA-264876	2/24	0.170982	0.726675	0	0	2.67523	4.72497	EXOC4;RAB27A
Phospholipase C-mediated cascade; FGFR4 Homo sapiens R-HSA-5654228	3/46	0.172095	0.729377	0	0	2.09366	3.68423	ITPR1;FGF1;FGF4
SUMO is transferred from E1 to E2 (UBE2I, UBC9) Homo sapiens R-HSA-3065678	1/6	0.172955	0.730999	0	0	5.35045	9.38856	SAE1
FGFR1b ligand binding and activation Homo sapiens R-HSA-190370	1/6	0.172955	0.728985	0	0	5.35045	9.38856	FGF1
Fibronectin matrix formation Homo sapiens R-HSA-1566977	1/6	0.172955	0.726982	0	0	5.35045	9.38856	FN1
RSK activation Homo sapiens R-HSA-444257	1/6	0.172955	0.724991	0	0	5.35045	9.38856	RPS6KA2
Scavenging by Class F Receptors Homo sapiens R-HSA-3000484	1/6	0.172955	0.72301	0	0	5.35045	9.38856	HSP90AA1
Activation of TRKA receptors Homo sapiens R-HSA-187015	1/6	0.172955	0.72104	0	0	5.35045	9.38856	NTRK2
Choline catabolism Homo sapiens R-HSA-6798163	1/6	0.172955	0.71908	0	0	5.35045	9.38856	SLC44A1
Pyrimidine biosynthesis Homo sapiens R-HSA-500753	1/6	0.172955	0.717132	0	0	5.35045	9.38856	TYMS
G2/M Transition Homo sapiens R-HSA-69275	8/173	0.173083	0.71572	0	0	1.48452	2.60383	CDK7;PCM1;HSP90AA1;HSP90AB1;PPP1R12A;CUL1;YWHAG;PAFAH1B1
RNA Polymerase I Transcription Initiation Homo sapiens R-HSA-73762	3/47	0.179871	0.741787	0	0	2.04911	3.51528	CDK7;GATAD2B;GATAD2A
Phospholipase C-mediated cascade: FGFR1 Homo sapiens R-HSA-5654219	3/47	0.179871	0.739793	0	0	2.04911	3.51528	ITPR1;FGF1;FGF4
Post-translational modification: synthesis of GPI-anchored proteins Homo sapiens R-HSA-163125	2/25	0.182233	0.747497	0	0	2.56822	4.37232	PGAP1;PIGL
ATF4 activates genes Homo sapiens R-HSA-380994	2/25	0.182233	0.745498	0	0	2.56822	4.37232	EXOSC5;ATF4
Constitutive Signaling by AKT1 E17K in Cancer Homo sapiens R-HSA-5674400	2/25	0.182233	0.74351	0	0	2.56822	4.37232	GSK3B;RICTOR
HDMs demethylate histones Homo sapiens R-HSA-3214842	2/25	0.182233	0.741532	0	0	2.56822	4.37232	KDM4C;KDM6A
Activation of G protein gated Potassium channels Homo sapiens R-HSA-1296041	2/25	0.182233	0.739566	0	0	2.56822	4.37232	KCNJ6;GNG7
Inhibition of voltage gated Ca2+ channels via Gbeta/gamma subunits Homo sapiens R-HSA-997272	2/25	0.182233	0.737609	0	0	2.56822	4.37232	KCNJ6;GNG7
G protein gated Potassium channels Homo sapiens R-HSA-1296059	2/25	0.182233	0.735663	0	0	2.56822	4.37232	KCNJ6;GNG7
Nitric oxide stimulates guanylate cyclase Homo sapiens R-HSA-392154	2/25	0.182233	0.733727	0	0	2.56822	4.37232	GUCY1A2;ITPR1
Costimulation by the CD28 family Homo sapiens R-HSA-388841	4/72	0.186411	0.74858	0	0	1.78348	2.9959	YES1;SRC;CD80;RICTOR
AURKA Activation by TPX2 Homo sapiens R-HSA-8854518	4/72	0.186411	0.74662	0	0	1.78348	2.9959	PCM1;HSP90AA1;YWHAG;PAFAH1B1
Retrograde transport at the Trans-Golgi-Network Homo sapiens R-HSA-6811440	3/49	0.195698	0.781768	0	0	1.96547	3.20605	NSF;COG5;VTI1A
CLEC7A (Dectin-1) signaling Homo sapiens R-HSA-5607764	5/99	0.196072	0.781223	0	0	1.62135	2.64163	SRC;CUL1;ITPR1;TAB2;RELB
Transport of nucleosides and free purine and pyrimidine bases across the plasma membrane Homo sapiens R-HSA-83936	1/7	0.198725	0.78974	0	0	4.5861	7.41037	SLC28A1
Anchoring fibril formation Homo sapiens R-HSA-2214320	1/7	0.198725	0.787694	0	0	4.5861	7.41037	LAMC2
Attachment of GPI anchor to uPAR Homo sapiens R-HSA-162791	1/7	0.198725	0.785659	0	0	4.5861	7.41037	PGAP1
NrCAM interactions Homo sapiens R-HSA-447038	1/7	0.198725	0.783634	0	0	4.5861	7.41037	NRP2
Regulation of gene expression in late stage (branching morphogenesis) pancreatic bud precursor cells Homo sapiens R-HSA-210744	1/7	0.198725	0.781619	0	0	4.5861	7.41037	RBPJ
FGFR3b ligand binding and activation Homo sapiens R-HSA-190371	1/7	0.198725	0.779615	0	0	4.5861	7.41037	FGF1
Binding of TCF/LEF:CTNNB1 to target gene promoters Homo sapiens R-HSA-4411364	1/7	0.198725	0.777621	0	0	4.5861	7.41037	TCF7L1
Defective HLCS causes multiple carboxylase deficiency Homo sapiens R-HSA-3371599	1/7	0.198725	0.775637	0	0	4.5861	7.41037	ACACB
Defects in biotin (Btn) metabolism Homo sapiens R-HSA-3323169	1/7	0.198725	0.773664	0	0	4.5861	7.41037	ACACB
Stimuli-sensing channels Homo sapiens R-HSA-2672351	5/100	0.201539	0.782627	0	0	1.60514	2.57106	TTYH2;RAF1;SGK1;TRPM3;ASIC1
Formation of the ternary complex, and subsequently, the 43S complex Homo sapiens R-HSA-72695	3/50	0.203735	0.789151	0	0	1.92616	3.0644	EIF3H;RPSA;EIF3A
VEGFR2 mediated vascular permeability Homo sapiens R-HSA-5218920	2/27	0.20503	0.792161	0	0	2.37798	3.76815	HSP90AA1;RICTOR
RNA Pol II CTD phosphorylation and interaction with CE Homo sapiens R-HSA-167160	2/27	0.20503	0.790165	0	0	2.37798	3.76815	CDK7;RNGTT
RNA Pol II CTD phosphorylation and interaction with CE Homo sapiens R-HSA-77075	2/27	0.20503	0.78818	0	0	2.37798	3.76815	CDK7;RNGTT
CREB phosphorylation through the activation of Ras Homo sapiens R-HSA-442742	2/27	0.20503	0.786205	0	0	2.37798	3.76815	RPS6KA2;RAF1
Platelet calcium homeostasis Homo sapiens R-HSA-418360	2/27	0.20503	0.784239	0	0	2.37798	3.76815	ITPR1;ATP2B4
Effects of PIP2 hydrolysis Homo sapiens R-HSA-114508	2/27	0.20503	0.782283	0	0	2.37798	3.76815	DGKG;ITPR1
Peroxisomal lipid metabolism Homo sapiens R-HSA-390918	2/27	0.20503	0.780337	0	0	2.37798	3.76815	IDH1;AGPS
SUMOylation of DNA damage response and repair proteins Homo sapiens R-HSA-3108214	4/75	0.205595	0.780548	0	0	1.71215	2.70835	RNF168;PHC1;NSMCE2;PIAS2
Neurotransmitter Release Cycle Homo sapiens R-HSA-112310	3/51	0.211847	0.802293	0	0	1.8884	2.93058	RIMS1;HSPA8;SYN1
Apoptotic execution phase Homo sapiens R-HSA-75153	3/51	0.211847	0.800312	0	0	1.8884	2.93058	STK24;MAPT;SPTAN1
Gap junction trafficking Homo sapiens R-HSA-190828	2/28	0.216543	0.816035	0	0	2.29305	3.5083	GJA1;CLTC
PERK regulates gene expression Homo sapiens R-HSA-381042	2/28	0.216543	0.81403	0	0	2.29305	3.5083	EXOSC5;ATF4
Energy dependent regulation of mTOR by LKB1-AMPK Homo sapiens R-HSA-380972	2/28	0.216543	0.812034	0	0	2.29305	3.5083	PPM1A;PRKAG2
RNA Polymerase III Transcription Initiation From Type 3 Promoter Homo sapiens R-HSA-76071	2/28	0.216543	0.810049	0	0	2.29305	3.5083	POU2F1;SNAPC3
RNA polymerase II transcribes snRNA genes Homo sapiens R-HSA-6807505	4/77	0.21869	0.816089	0	0	1.66767	2.53503	CDK7;POU2F1;SNAPC3;ELL2
Vitamin C (ascorbate) metabolism Homo sapiens R-HSA-196836	1/8	0.223694	0.832729	0	0	4.01284	6.00914	SLC2A3
Synthesis of diphthamide-EEF2 Homo sapiens R-HSA-5358493	1/8	0.223694	0.830708	0	0	4.01284	6.00914	EEF2
HuR (ELAVL1) binds and stabilizes mRNA Homo sapiens R-HSA-450520	1/8	0.223694	0.828696	0	0	4.01284	6.00914	ANP32A
Activation of PUMA and translocation to mitochondria Homo sapiens R-HSA-139915	1/8	0.223694	0.826695	0	0	4.01284	6.00914	TFDP1
AMPK inhibits chREBP transcriptional activation activity Homo sapiens R-HSA-163680	1/8	0.223694	0.824703	0	0	4.01284	6.00914	PRKAG2
Sema4D mediated inhibition of cell attachment and migration Homo sapiens R-HSA-416550	1/8	0.223694	0.82272	0	0	4.01284	6.00914	ARHGAP35
Axonal growth inhibition (RHOA activation) Homo sapiens R-HSA-193634	1/8	0.223694	0.820747	0	0	4.01284	6.00914	RTN4
ChREBP activates metabolic gene expression Homo sapiens R-HSA-163765	1/8	0.223694	0.818784	0	0	4.01284	6.00914	ACACB
NR1D1 (REV-ERBA) represses gene expression Homo sapiens R-HSA-1368071	1/8	0.223694	0.816829	0	0	4.01284	6.00914	NCOR1
ER to Golgi Anterograde Transport Homo sapiens R-HSA-199977	6/131	0.224744	0.818711	0	0	1.47035	2.19493	NSF;ANKRD28;COG5;ANK2;ANK3;SPTAN1
G2/M DNA damage checkpoint Homo sapiens R-HSA-69473	4/78	0.225321	0.818861	0	0	1.64629	2.45336	RNF168;CHEK1;YWHAZ;YWHAG
mRNA Capping Homo sapiens R-HSA-72086	2/29	0.22811	0.827035	0	0	2.21398	3.2721	CDK7;RNGTT
Myogenesis Homo sapiens R-HSA-525793	2/29	0.22811	0.82508	0	0	2.21398	3.2721	CDH4;MAPK14
CDO in myogenesis Homo sapiens R-HSA-375170	2/29	0.22811	0.823134	0	0	2.21398	3.2721	CDH4;MAPK14
Glucose metabolism Homo sapiens R-HSA-70326	4/79	0.232002	0.835206	0	0	1.62545	2.37481	PFKFB3;PHKG1;ENO1;SLC25A12
Centrosome maturation Homo sapiens R-HSA-380287	4/79	0.232002	0.833245	0	0	1.62545	2.37481	PCM1;HSP90AA1;YWHAG;PAFAH1B1
Recruitment of mitotic centrosome proteins and complexes Homo sapiens R-HSA-380270	4/79	0.232002	0.831294	0	0	1.62545	2.37481	PCM1;HSP90AA1;YWHAG;PAFAH1B1
Heparan sulfate/heparin (HS-GAG) metabolism Homo sapiens R-HSA-1638091	3/54	0.236572	0.845691	0	0	1.78348	2.5709	EXT1;NDST1;HS3ST5
Mitochondrial protein import Homo sapiens R-HSA-1268020	3/54	0.236572	0.84372	0	0	1.78348	2.5709	TIMM23;SLC25A12;HSPD1
Transport to the Golgi and subsequent modification Homo sapiens R-HSA-948021	7/162	0.241761	0.86022	0	0	1.38715	1.96949	NSF;ANKRD28;CHST8;COG5;ANK2;ANK3;SPTAN1
Type I hemidesmosome assembly Homo sapiens R-HSA-446107	1/9	0.247885	0.879964	0	0	3.56697	4.97517	LAMC2
Processing and activation of SUMO Homo sapiens R-HSA-3215018	1/9	0.247885	0.877927	0	0	3.56697	4.97517	SAE1
EGFR Transactivation by Gastrin Homo sapiens R-HSA-2179392	1/9	0.247885	0.8759	0	0	3.56697	4.97517	SOS1
CHL1 interactions Homo sapiens R-HSA-447041	1/9	0.247885	0.873882	0	0	3.56697	4.97517	HSPA8
RHO GTPases Activate Rhotekin and Rhophilins Homo sapiens R-HSA-5666185	1/9	0.247885	0.871873	0	0	3.56697	4.97517	RHPN2
Inactivation of Cdc42 and Rac Homo sapiens R-HSA-428543	1/9	0.247885	0.869873	0	0	3.56697	4.97517	SRGAP3
Adrenoceptors Homo sapiens R-HSA-390696	1/9	0.247885	0.867883	0	0	3.56697	4.97517	ADRB3
p75NTR regulates axonogenesis Homo sapiens R-HSA-193697	1/9	0.247885	0.865901	0	0	3.56697	4.97517	RTN4
Trafficking of AMPA receptors Homo sapiens R-HSA-399719	2/31	0.251354	0.876018	0	0	2.07114	2.86003	NSF;EPB41L1
Glutamate Binding, Activation of AMPA Receptors and Synaptic Plasticity Homo sapiens R-HSA-399721	2/31	0.251354	0.874027	0	0	2.07114	2.86003	NSF;EPB41L1
Inwardly rectifying K+ channels Homo sapiens R-HSA-1296065	2/31	0.251354	0.872045	0	0	2.07114	2.86003	KCNJ6;GNG7
Integration of energy metabolism Homo sapiens R-HSA-163685	5/110	0.258712	0.895542	0	0	1.45921	1.97292	GNG7;ITPR1;PRKAG2;IQGAP1;ACACB
Ribosomal scanning and start codon recognition Homo sapiens R-HSA-72702	3/57	0.26176	0.904047	0	0	1.68962	2.26464	EIF3H;RPSA;EIF3A
Translation initiation complex formation Homo sapiens R-HSA-72649	3/57	0.26176	0.902011	0	0	1.68962	2.26464	EIF3H;RPSA;EIF3A
DNA methylation Homo sapiens R-HSA-5334118	2/32	0.263003	0.904259	0	0	2.00642	2.67975	UHRF1;DNMT3A
Signaling by NOTCH2 Homo sapiens R-HSA-1980145	2/32	0.263003	0.902231	0	0	2.00642	2.67975	MAML2;RBPJ
Gluconeogenesis Homo sapiens R-HSA-70263	2/32	0.263003	0.900213	0	0	2.00642	2.67975	ENO1;SLC25A12
Glycolysis Homo sapiens R-HSA-70171	2/32	0.263003	0.898203	0	0	2.00642	2.67975	PFKFB3;ENO1
Thrombin signalling through proteinase activated receptors (PARs) Homo sapiens R-HSA-456926	2/32	0.263003	0.896203	0	0	2.00642	2.67975	SRC;GNG7
Activation of the mRNA upon binding of the cap-binding complex and eIFs, and subsequent binding to 43S Homo sapiens R-HSA-72662	3/58	0.270233	0.918793	0	0	1.66049	2.1727	EIF3H;RPSA;EIF3A
Formation of the beta-catenin:TCF transactivating complex Homo sapiens R-HSA-201722	3/58	0.270233	0.916755	0	0	1.66049	2.1727	TLE4;CREBBP;TCF7L1
G1/S Transition Homo sapiens R-HSA-69206	5/112	0.270595	0.915952	0	0	1.43316	1.87333	CDK7;TFDP1;CUL1;TYMS;MCM2
Establishment of Sister Chromatid Cohesion Homo sapiens R-HSA-2468052	1/10	0.271324	0.916393	0	0	3.21027	4.18761	PDS5A
Nef mediated downregulation of MHC class I complex cell surface expression Homo sapiens R-HSA-164940	1/10	0.271324	0.914375	0	0	3.21027	4.18761	AP1G1
Reactions specific to the complex N-glycan synthesis pathway Homo sapiens R-HSA-975578	1/10	0.271324	0.912365	0	0	3.21027	4.18761	CHST8
ATF6-alpha activates chaperone genes Homo sapiens R-HSA-381183	1/10	0.271324	0.910364	0	0	3.21027	4.18761	ATF4
POU5F1 (OCT4), SOX2, NANOG repress genes related to differentiation Homo sapiens R-HSA-2892245	1/10	0.271324	0.908372	0	0	3.21027	4.18761	TSC22D1
Signal attenuation Homo sapiens R-HSA-74749	1/10	0.271324	0.906389	0	0	3.21027	4.18761	SOS1
MAPK3 (ERK1) activation Homo sapiens R-HSA-110056	1/10	0.271324	0.904414	0	0	3.21027	4.18761	MAP2K1
Regulation of gene expression by Hypoxia-inducible Factor Homo sapiens R-HSA-1234158	1/10	0.271324	0.902448	0	0	3.21027	4.18761	CREBBP
Activation of the AP-1 family of transcription factors Homo sapiens R-HSA-450341	1/10	0.271324	0.900491	0	0	3.21027	4.18761	MAPK14
Netrin mediated repulsion signals Homo sapiens R-HSA-418886	1/10	0.271324	0.898541	0	0	3.21027	4.18761	SRC
Tetrahydrobiopterin (BH4) synthesis, recycling, salvage and regulation Homo sapiens R-HSA-1474151	1/10	0.271324	0.896601	0	0	3.21027	4.18761	HSP90AA1
Synthesis of pyrophosphates in the cytosol Homo sapiens R-HSA-1855167	1/10	0.271324	0.894668	0	0	3.21027	4.18761	NUDT3
Sphingolipid de novo biosynthesis Homo sapiens R-HSA-1660661	2/33	0.274654	0.903701	0	0	1.94562	2.51421	SGMS1;SPTLC2
E2F mediated regulation of DNA replication Homo sapiens R-HSA-113510	2/33	0.274654	0.901762	0	0	1.94562	2.51421	TFDP1;TYMS
Signaling by WNT in cancer Homo sapiens R-HSA-4791275	2/34	0.286296	0.937971	0	0	1.8884	2.36187	GSK3B;CTBP2
Striated Muscle Contraction Homo sapiens R-HSA-390522	2/34	0.286296	0.935967	0	0	1.8884	2.36187	TPM3;TTN
Antigen processing: Ubiquitination & Proteasome degradation Homo sapiens R-HSA-983168	10/260	0.293138	0.956291	0	0	1.23472	1.51514	TRIM71;UBE2R2;SMURF1;CUL3;CUL1;LNPEP;TRIP12;UBE2K;RNF220;TRAIP
Uptake and function of anthrax toxins Homo sapiens R-HSA-5210891	1/11	0.294034	0.957174	0	0	2.91843	3.57233	MAP2K1
Transport of organic anions Homo sapiens R-HSA-879518	1/11	0.294034	0.955142	0	0	2.91843	3.57233	SLCO2A1
CDC6 association with the ORC:origin complex Homo sapiens R-HSA-68689	1/11	0.294034	0.953118	0	0	2.91843	3.57233	E2F3
DSCAM interactions Homo sapiens R-HSA-376172	1/11	0.294034	0.951103	0	0	2.91843	3.57233	MAPK14
Condensation of Prometaphase Chromosomes Homo sapiens R-HSA-2514853	1/11	0.294034	0.949097	0	0	2.91843	3.57233	CSNK2A1
RHO GTPases activate IQGAPs Homo sapiens R-HSA-5626467	1/11	0.294034	0.947099	0	0	2.91843	3.57233	IQGAP1
CLEC7A (Dectin-1) induces NFAT activation Homo sapiens R-HSA-5607763	1/11	0.294034	0.945109	0	0	2.91843	3.57233	ITPR1
Biotin transport and metabolism Homo sapiens R-HSA-196780	1/11	0.294034	0.943127	0	0	2.91843	3.57233	ACACB
Heme biosynthesis Homo sapiens R-HSA-189451	1/11	0.294034	0.941154	0	0	2.91843	3.57233	UROS
SeMet incorporation into proteins Homo sapiens R-HSA-2408517	1/11	0.294034	0.93919	0	0	2.91843	3.57233	DARS
RNA Polymerase I, RNA Polymerase III, and Mitochondrial Transcription Homo sapiens R-HSA-504046	5/116	0.29469	0.939323	0	0	1.38374	1.6907	CDK7;POU2F1;SNAPC3;GATAD2B;GATAD2A
TP53 Regulates Transcription of DNA Repair Genes Homo sapiens R-HSA-6796648	3/61	0.295811	0.940936	0	0	1.57882	1.92306	CDK7;CHEK1;CDK13
Post NMDA receptor activation events Homo sapiens R-HSA-438064	2/35	0.297917	0.94567	0	0	1.83444	2.2214	RPS6KA2;RAF1
RNA Polymerase III Transcription Initiation Homo sapiens R-HSA-76046	2/36	0.309508	0.980429	0	0	1.78348	2.09162	POU2F1;SNAPC3
Ethanol oxidation Homo sapiens R-HSA-71384	1/12	0.316037	0.999042	0	0	2.67523	3.08159	ACSS1
Endosomal/Vacuolar pathway Homo sapiens R-HSA-1236977	1/12	0.316037	0.996982	0	0	2.67523	3.08159	LNPEP
ATF6-alpha activates chaperones Homo sapiens R-HSA-381033	1/12	0.316037	0.994931	0	0	2.67523	3.08159	ATF4
mRNA decay by 3' to 5' exoribonuclease Homo sapiens R-HSA-429958	1/12	0.316037	0.992888	0	0	2.67523	3.08159	EXOSC5
TP53 Regulates Transcription of Caspase Activators and Caspases Homo sapiens R-HSA-6803207	1/12	0.316037	0.990853	0	0	2.67523	3.08159	CRADD
CD28 dependent Vav1 pathway Homo sapiens R-HSA-389359	1/12	0.316037	0.988827	0	0	2.67523	3.08159	CD80
Inhibition of replication initiation of damaged DNA by RB1/E2F1 Homo sapiens R-HSA-113501	1/12	0.316037	0.986809	0	0	2.67523	3.08159	TFDP1
Unwinding of DNA Homo sapiens R-HSA-176974	1/12	0.316037	0.984799	0	0	2.67523	3.08159	MCM2
Reduction of cytosolic Ca++ levels Homo sapiens R-HSA-418359	1/12	0.316037	0.982797	0	0	2.67523	3.08159	ATP2B4
The NLRP3 inflammasome Homo sapiens R-HSA-844456	1/12	0.316037	0.980804	0	0	2.67523	3.08159	HSP90AB1
Physiological factors Homo sapiens R-HSA-5578768	1/12	0.316037	0.978818	0	0	2.67523	3.08159	HIPK1
Translesion synthesis by Y family DNA polymerases bypasses lesions on DNA template Homo sapiens R-HSA-110313	2/37	0.321059	0.992364	0	0	1.73528	1.97151	USP10;REV3L
Activation of ATR in response to replication stress Homo sapiens R-HSA-176187	2/37	0.321059	0.990364	0	0	1.73528	1.97151	CHEK1;MCM2
Glycosaminoglycan metabolism Homo sapiens R-HSA-1630316	5/121	0.325276	1	0	0	1.32656	1.48984	EXT1;NDST1;CEMIP;B3GNT2;HS3ST5
Transport of vitamins, nucleosides, and related molecules Homo sapiens R-HSA-425397	2/38	0.332562	1	0	0	1.68962	1.86015	SLCO2A1;SLC28A1
Facilitative Na+-independent glucose transporters Homo sapiens R-HSA-428790	1/13	0.337355	1	0	0	2.46944	2.68334	SLC2A3
Retrograde neurotrophin signalling Homo sapiens R-HSA-177504	1/13	0.337355	1	0	0	2.46944	2.68334	SH3GL2
AKT phosphorylates targets in the cytosol Homo sapiens R-HSA-198323	1/13	0.337355	1	0	0	2.46944	2.68334	GSK3B
Signal regulatory protein (SIRP) family interactions Homo sapiens R-HSA-391160	1/13	0.337355	1	0	0	2.46944	2.68334	SRC
Platelet Adhesion to exposed collagen Homo sapiens R-HSA-75892	1/13	0.337355	1	0	0	2.46944	2.68334	VWF
Neuronal System Homo sapiens R-HSA-112316	11/301	0.337576	1	0	0	1.17319	1.27404	NSF;RIMS1;HSPA8;KCNJ6;EPB41L1;RPS6KA2;GNG7;GRIK3;GRIK4;RAF1;SYN1
O-linked glycosylation of mucins Homo sapiens R-HSA-913709	3/66	0.338679	1	0	0	1.45921	1.57989	GALNT2;C1GALT1;B3GNT2
Triglyceride Biosynthesis Homo sapiens R-HSA-75109	3/66	0.338679	1	0	0	1.45921	1.57989	AGK;ACSL6;ELOVL6
Cell Cycle Checkpoints Homo sapiens R-HSA-69620	7/182	0.339621	1	0	0	1.23472	1.3334	RNF168;ANAPC15;CHEK1;MDM4;YWHAZ;YWHAG;MCM2
mTOR signalling Homo sapiens R-HSA-165159	2/39	0.344008	1	0	0	1.64629	1.75674	PPM1A;PRKAG2
GABA B receptor activation Homo sapiens R-HSA-977444	2/39	0.344008	1	0	0	1.64629	1.75674	KCNJ6;GNG7
Activation of GABAB receptors Homo sapiens R-HSA-991365	2/39	0.344008	1	0	0	1.64629	1.75674	KCNJ6;GNG7
Activation of NMDA receptor upon glutamate binding and postsynaptic events Homo sapiens R-HSA-442755	2/39	0.344008	1	0	0	1.64629	1.75674	RPS6KA2;RAF1
Integrin cell surface interactions Homo sapiens R-HSA-216083	3/67	0.347249	1	0	0	1.43744	1.52039	PECAM1;FN1;JAM2
Macroautophagy Homo sapiens R-HSA-1632852	3/67	0.347249	1	0	0	1.43744	1.52039	PRKAG2;ULK1;WDR45
Regulation of RAS by GAPs Homo sapiens R-HSA-5658442	3/67	0.347249	1	0	0	1.43744	1.52039	SPRED2;CUL3;DAB2IP
Signaling by PTK6 Homo sapiens R-HSA-8848021	3/67	0.347249	1	0	0	1.43744	1.52039	SPRED2;DAB2IP;ARHGAP35
PKB-mediated events Homo sapiens R-HSA-109703	2/40	0.35539	1	0	0	1.60514	1.66058	PPM1A;PRKAG2
Anchoring of the basal body to the plasma membrane Homo sapiens R-HSA-5620912	4/97	0.357648	1	0	0	1.32382	1.36116	PCM1;HSP90AA1;YWHAG;PAFAH1B1
Regulation of actin dynamics for phagocytic cup formation Homo sapiens R-HSA-2029482	4/97	0.357648	1	0	0	1.32382	1.36116	HSP90AA1;HSP90AB1;ARPC2;MYH9
SUMOylation of transcription factors Homo sapiens R-HSA-3232118	1/14	0.35801	1	0	0	2.29305	2.35541	SP3
Regulation of IFNG signaling Homo sapiens R-HSA-877312	1/14	0.35801	1	0	0	2.29305	2.35541	PTPN2
AMER1 mutants destabilize the destruction complex Homo sapiens R-HSA-4839748	1/14	0.35801	1	0	0	2.29305	2.35541	GSK3B
Truncations of AMER1 destabilize the destruction complex Homo sapiens R-HSA-5467348	1/14	0.35801	1	0	0	2.29305	2.35541	GSK3B
truncated APC mutants destabilize the destruction complex Homo sapiens R-HSA-4839744	1/14	0.35801	1	0	0	2.29305	2.35541	GSK3B
AXIN missense mutants destabilize the destruction complex Homo sapiens R-HSA-5467340	1/14	0.35801	1	0	0	2.29305	2.35541	GSK3B
AXIN mutants destabilize the destruction complex, activating WNT signaling Homo sapiens R-HSA-4839735	1/14	0.35801	1	0	0	2.29305	2.35541	GSK3B
APC truncation mutants have impaired AXIN binding Homo sapiens R-HSA-5467337	1/14	0.35801	1	0	0	2.29305	2.35541	GSK3B
TRAF3-dependent IRF activation pathway Homo sapiens R-HSA-918233	1/14	0.35801	1	0	0	2.29305	2.35541	CREBBP
Nicotinate metabolism Homo sapiens R-HSA-196807	1/14	0.35801	1	0	0	2.29305	2.35541	NMNAT2
Synthesis of Prostaglandins (PG) and Thromboxanes (TX) Homo sapiens R-HSA-2162123	1/14	0.35801	1	0	0	2.29305	2.35541	PTGES
Metabolism of water-soluble vitamins and cofactors Homo sapiens R-HSA-196849	4/98	0.364754	1	0	0	1.31032	1.3215	ALDH1L1;SLC2A3;NMNAT2;ACACB
Assembly of the primary cilium Homo sapiens R-HSA-5617833	7/187	0.364999	1	0	0	1.20171	1.21115	PCM1;HSP90AA1;EXOC4;IFT80;IFT46;YWHAG;PAFAH1B1
Intraflagellar transport Homo sapiens R-HSA-5620924	2/41	0.3667	1	0	0	1.56599	1.57101	IFT80;IFT46
RNA Polymerase III Abortive And Retractive Initiation Homo sapiens R-HSA-749476	2/41	0.3667	1	0	0	1.56599	1.57101	POU2F1;SNAPC3
RNA Polymerase III Transcription Homo sapiens R-HSA-74158	2/41	0.3667	1	0	0	1.56599	1.57101	POU2F1;SNAPC3
Non-integrin membrane-ECM interactions Homo sapiens R-HSA-3000171	2/42	0.377933	1	0	0	1.5287	1.48749	PDGFA;LAMC2
Netrin-1 signaling Homo sapiens R-HSA-373752	2/42	0.377933	1	0	0	1.5287	1.48749	ABLIM1;SRC
Cooperation of PDCL (PhLP1) and TRiC/CCT in G-protein beta folding Homo sapiens R-HSA-6814122	2/42	0.377933	1	0	0	1.5287	1.48749	CSNK2A1;GNG7
WNT5A-dependent internalization of FZD4 Homo sapiens R-HSA-5099900	1/15	0.378022	1	0	0	2.14018	2.08198	CLTC
Association of licensing factors with the pre-replicative complex Homo sapiens R-HSA-69298	1/15	0.378022	1	0	0	2.14018	2.08198	E2F3
Prolactin receptor signaling Homo sapiens R-HSA-1170546	1/15	0.378022	1	0	0	2.14018	2.08198	CUL1
Glycogen breakdown (glycogenolysis) Homo sapiens R-HSA-70221	1/15	0.378022	1	0	0	2.14018	2.08198	PHKG1
S33 mutants of beta-catenin aren't phosphorylated Homo sapiens R-HSA-5358747	1/15	0.378022	1	0	0	2.14018	2.08198	GSK3B
S45 mutants of beta-catenin aren't phosphorylated Homo sapiens R-HSA-5358751	1/15	0.378022	1	0	0	2.14018	2.08198	GSK3B
phosphorylation site mutants of CTNNB1 are not targeted to the proteasome by the destruction complex Homo sapiens R-HSA-4839743	1/15	0.378022	1	0	0	2.14018	2.08198	GSK3B
T41 mutants of beta-catenin aren't phosphorylated Homo sapiens R-HSA-5358752	1/15	0.378022	1	0	0	2.14018	2.08198	GSK3B
S37 mutants of beta-catenin aren't phosphorylated Homo sapiens R-HSA-5358749	1/15	0.378022	1	0	0	2.14018	2.08198	GSK3B
Misspliced GSK3beta mutants stabilize beta-catenin Homo sapiens R-HSA-5339716	1/15	0.378022	1	0	0	2.14018	2.08198	GSK3B
ERBB2 Regulates Cell Motility Homo sapiens R-HSA-6785631	1/15	0.378022	1	0	0	2.14018	2.08198	MEMO1
Elevation of cytosolic Ca2+ levels Homo sapiens R-HSA-139853	1/15	0.378022	1	0	0	2.14018	2.08198	ITPR1
Metabolism of carbohydrates Homo sapiens R-HSA-71387	10/282	0.383495	1	0	0	1.13839	1.09107	EXT1;NDST1;CEMIP;PFKFB3;PHKG1;B3GNT2;SLC2A3;HS3ST5;ENO1;SLC25A12
Gene Silencing by RNA Homo sapiens R-HSA-211000	4/101	0.386041	1	0	0	1.2714	1.21013	HSP90AA1;AGO1;AGO2;TNRC6A
TP53 Regulates Transcription of Cell Death Genes Homo sapiens R-HSA-5633008	2/43	0.389081	1	0	0	1.49315	1.40948	CREBBP;CRADD
ERCC6 (CSB) and EHMT2 (G9a) positively regulate rRNA expression Homo sapiens R-HSA-427389	2/43	0.389081	1	0	0	1.49315	1.40948	GATAD2B;GATAD2A
Transcriptional regulation by small RNAs Homo sapiens R-HSA-5578749	3/72	0.389855	1	0	0	1.33761	1.26001	AGO1;AGO2;TNRC6A
ISG15 antiviral mechanism Homo sapiens R-HSA-1169408	3/72	0.389855	1	0	0	1.33761	1.26001	PPM1B;KPNA7;ARIH1
Antiviral mechanism by IFN-stimulated genes Homo sapiens R-HSA-1169410	3/72	0.389855	1	0	0	1.33761	1.26001	PPM1B;KPNA7;ARIH1
Synthesis of glycosylphosphatidylinositol (GPI) Homo sapiens R-HSA-162710	1/16	0.397411	1	0	0	2.00642	1.85149	PIGL
Translesion synthesis by REV1 Homo sapiens R-HSA-110312	1/16	0.397411	1	0	0	2.00642	1.85149	REV3L
TRAF6 mediated induction of TAK1 complex Homo sapiens R-HSA-937072	1/16	0.397411	1	0	0	2.00642	1.85149	TAB2
Spry regulation of FGF signaling Homo sapiens R-HSA-1295596	1/16	0.397411	1	0	0	2.00642	1.85149	SRC
PI3K events in ERBB2 signaling Homo sapiens R-HSA-1963642	1/16	0.397411	1	0	0	2.00642	1.85149	GAB1
GRB2 events in ERBB2 signaling Homo sapiens R-HSA-1963640	1/16	0.397411	1	0	0	2.00642	1.85149	SOS1
CRMPs in Sema3A signaling Homo sapiens R-HSA-399956	1/16	0.397411	1	0	0	2.00642	1.85149	GSK3B
RHO GTPases activate CIT Homo sapiens R-HSA-5625900	1/16	0.397411	1	0	0	2.00642	1.85149	MYH9
TGF-beta receptor signaling in EMT (epithelial to mesenchymal transition) Homo sapiens R-HSA-2173791	1/16	0.397411	1	0	0	2.00642	1.85149	SMURF1
Metabolism of folate and pterines Homo sapiens R-HSA-196757	1/16	0.397411	1	0	0	2.00642	1.85149	ALDH1L1
Apoptosis Homo sapiens R-HSA-109581	6/163	0.39786	1	0	0	1.1817	1.08911	TFDP1;STK24;MAPT;SPTAN1;YWHAZ;YWHAG
Positive epigenetic regulation of rRNA expression Homo sapiens R-HSA-5250913	3/73	0.398303	1	0	0	1.31929	1.21446	GSK3B;GATAD2B;GATAD2A
Metabolism of lipids and lipoproteins Homo sapiens R-HSA-556833	22/659	0.400035	1	0	0	1.07171	0.981908	CREBBP;SGMS1;SLC44A1;AGK;NCOA3;IDH1;ACSL6;PRKAG2;ELOVL6;NRF1;ACACB;MED13L;NCOR2;NCOR1;SPTLC2;TBL1XR1;AGPS;SCAP;PIP5K1B;TBL1X;TNFRSF21;PTGES
Interferon Signaling Homo sapiens R-HSA-913531	7/196	0.410935	1	0	0	1.14653	1.01963	EGR1;PPM1B;KPNA7;NCAM1;ARIH1;MID1;PTPN2
Muscle contraction Homo sapiens R-HSA-397014	7/196	0.410935	1	0	0	1.14653	1.01963	TPM3;ANXA6;ITPR1;ATP2B4;SORBS1;HIPK1;TTN
RMTs methylate histone arginines Homo sapiens R-HSA-3214858	2/45	0.411104	1	0	0	1.42679	1.26828	DNMT3A;ARID1B
Diseases of metabolism Homo sapiens R-HSA-5668914	2/45	0.411104	1	0	0	1.42679	1.26828	IDH1;ACACB
Programmed Cell Death Homo sapiens R-HSA-5357801	6/166	0.414562	1	0	0	1.16034	1.02172	TFDP1;STK24;MAPT;SPTAN1;YWHAZ;YWHAG
Metabolism of proteins Homo sapiens R-HSA-392499	35/1074	0.415696	1	0	0	1.04618	0.918336	PGAP1;HSPD1;EXOSC5;GNG7;SPTAN1;CHST8;ANKRD28;NSF;PHC1;CSNK2A1;ST8SIA1;COG5;GALNT2;NSMCE2;C1GALT1;TIMM23;RAB27A;RPSA;ANK2;ANK3;EEF2;PIAS2;RNF168;EEF1A1;SP3;TBCE;EXOC4;EIF3H;B3GNT2;PIGL;TOP1;SLC25A12;SAE1;EIF3A;ATF4
Acetylcholine Neurotransmitter Release Cycle Homo sapiens R-HSA-264642	1/17	0.416197	1	0	0	1.8884	1.65536	RIMS1
Hyaluronan metabolism Homo sapiens R-HSA-2142845	1/17	0.416197	1	0	0	1.8884	1.65536	CEMIP
Trafficking of GluR2-containing AMPA receptors Homo sapiens R-HSA-416993	1/17	0.416197	1	0	0	1.8884	1.65536	NSF
Tristetraprolin (TTP, ZFP36) binds and destabilizes mRNA Homo sapiens R-HSA-450513	1/17	0.416197	1	0	0	1.8884	1.65536	EXOSC5
Butyrate Response Factor 1 (BRF1) binds and destabilizes mRNA Homo sapiens R-HSA-450385	1/17	0.416197	1	0	0	1.8884	1.65536	EXOSC5
Translesion synthesis by POLK Homo sapiens R-HSA-5655862	1/17	0.416197	1	0	0	1.8884	1.65536	REV3L
Translesion synthesis by POLI Homo sapiens R-HSA-5656121	1/17	0.416197	1	0	0	1.8884	1.65536	REV3L
Beta-catenin phosphorylation cascade Homo sapiens R-HSA-196299	1/17	0.416197	1	0	0	1.8884	1.65536	GSK3B
Metabolism of porphyrins Homo sapiens R-HSA-189445	1/17	0.416197	1	0	0	1.8884	1.65536	UROS
Signaling by Hedgehog Homo sapiens R-HSA-5358351	5/136	0.418096	1	0	0	1.18025	1.02923	GSK3B;HHAT;SMURF1;CUL3;CUL1
DNA Damage Bypass Homo sapiens R-HSA-73893	2/46	0.421968	1	0	0	1.39577	1.20431	USP10;REV3L
RNA Polymerase I Promoter Clearance Homo sapiens R-HSA-73854	3/76	0.42344	1	0	0	1.26721	1.08897	CDK7;GATAD2B;GATAD2A
Antigen activates B Cell Receptor (BCR) leading to generation of second messengers Homo sapiens R-HSA-983695	2/47	0.432728	1	0	0	1.36607	1.14429	ITPR1;SOS1
Norepinephrine Neurotransmitter Release Cycle Homo sapiens R-HSA-181430	1/18	0.434397	1	0	0	1.78348	1.48706	RIMS1
TP53 Regulates Transcription of Genes Involved in G2 Cell Cycle Arrest Homo sapiens R-HSA-6804114	1/18	0.434397	1	0	0	1.78348	1.48706	TFDP1
Signaling by cytosolic FGFR1 fusion mutants Homo sapiens R-HSA-1839117	1/18	0.434397	1	0	0	1.78348	1.48706	MYO18A
SHC1 events in ERBB2 signaling Homo sapiens R-HSA-1250196	1/18	0.434397	1	0	0	1.78348	1.48706	SOS1
Tie2 Signaling Homo sapiens R-HSA-210993	1/18	0.434397	1	0	0	1.78348	1.48706	SOS1
cGMP effects Homo sapiens R-HSA-418457	1/18	0.434397	1	0	0	1.78348	1.48706	ITPR1
Defects in vitamin and cofactor metabolism Homo sapiens R-HSA-3296482	1/18	0.434397	1	0	0	1.78348	1.48706	ACACB
Amine-derived hormones Homo sapiens R-HSA-209776	1/18	0.434397	1	0	0	1.78348	1.48706	DDC
RNA Polymerase I Transcription Homo sapiens R-HSA-73864	3/79	0.448208	1	0	0	1.21909	0.978317	CDK7;GATAD2B;GATAD2A
Golgi-to-ER retrograde transport Homo sapiens R-HSA-8856688	4/110	0.449133	1	0	0	1.16737	0.934408	NSF;GALNT2;BICD1;PAFAH1B1
Gap junction assembly Homo sapiens R-HSA-190861	1/19	0.452032	1	0	0	1.68962	1.34156	GJA1
TP53 Regulates Transcription of Genes Involved in Cytochrome C Release Homo sapiens R-HSA-6803204	1/19	0.452032	1	0	0	1.68962	1.34156	CREBBP
Regulation of TP53 Activity through Methylation Homo sapiens R-HSA-6804760	1/19	0.452032	1	0	0	1.68962	1.34156	MDM4
Phosphorylation of the APC/C Homo sapiens R-HSA-176412	1/19	0.452032	1	0	0	1.68962	1.34156	ANAPC15
Ephrin signaling Homo sapiens R-HSA-3928664	1/19	0.452032	1	0	0	1.68962	1.34156	SRC
Prostacyclin signalling through prostacyclin receptor Homo sapiens R-HSA-392851	1/19	0.452032	1	0	0	1.68962	1.34156	GNG7
FCGR activation Homo sapiens R-HSA-2029481	2/49	0.453919	1	0	0	1.31032	1.03493	YES1;SRC
Regulation of HSF1-mediated heat shock response Homo sapiens R-HSA-3371453	3/80	0.45637	1	0	0	1.20385	0.944364	GSK3B;HSPA8;TNFRSF21
Regulation of insulin secretion Homo sapiens R-HSA-422356	3/80	0.45637	1	0	0	1.20385	0.944364	GNG7;ITPR1;IQGAP1
Opioid Signalling Homo sapiens R-HSA-111885	3/81	0.46448	1	0	0	1.18899	0.911762	PDE4D;GNG7;ITPR1
Defective C1GALT1C1 causes Tn polyagglutination syndrome (TNPS) Homo sapiens R-HSA-5083632	1/20	0.469117	1	0	0	1.60514	1.21493	C1GALT1
IL-6-type cytokine receptor ligand interactions Homo sapiens R-HSA-6788467	1/20	0.469117	1	0	0	1.60514	1.21493	LIFR
Inhibition of the proteolytic activity of APC/C required for the onset of anaphase by mitotic spindle checkpoint components Homo sapiens R-HSA-141405	1/20	0.469117	1	0	0	1.60514	1.21493	ANAPC15
Inactivation of APC/C via direct inhibition of the APC/C complex Homo sapiens R-HSA-141430	1/20	0.469117	1	0	0	1.60514	1.21493	ANAPC15
G beta:gamma signalling through PLC beta Homo sapiens R-HSA-418217	1/20	0.469117	1	0	0	1.60514	1.21493	GNG7
Signaling by Hippo Homo sapiens R-HSA-2028269	1/20	0.469117	1	0	0	1.60514	1.21493	WWC1
Synthesis of PC Homo sapiens R-HSA-1483191	1/20	0.469117	1	0	0	1.60514	1.21493	SLC44A1
Ion homeostasis Homo sapiens R-HSA-5578775	2/51	0.474649	1	0	0	1.25893	0.938128	ITPR1;ATP2B4
Class I MHC mediated antigen processing & presentation Homo sapiens R-HSA-983169	10/305	0.479774	1	0	0	1.05255	0.773035	TRIM71;UBE2R2;SMURF1;CUL3;CUL1;LNPEP;TRIP12;UBE2K;RNF220;TRAIP
Nef-mediates down modulation of cell surface receptors by recruiting them to clathrin adapters Homo sapiens R-HSA-164938	1/21	0.485671	1	0	0	1.5287	1.10407	AP1G1
Mitotic Spindle Checkpoint Homo sapiens R-HSA-69618	1/21	0.485671	1	0	0	1.5287	1.10407	ANAPC15
Regulation of FZD by ubiquitination Homo sapiens R-HSA-4641263	1/21	0.485671	1	0	0	1.5287	1.10407	LGR4
VxPx cargo-targeting to cilium Homo sapiens R-HSA-5620916	1/21	0.485671	1	0	0	1.5287	1.10407	EXOC4
Intra-Golgi and retrograde Golgi-to-ER traffic Homo sapiens R-HSA-6811442	6/179	0.486006	1	0	0	1.07607	0.776421	NSF;COG5;GALNT2;VTI1A;BICD1;PAFAH1B1
Peptide chain elongation Homo sapiens R-HSA-156902	3/84	0.488481	1	0	0	1.14653	0.821434	EEF1A1;RPSA;EEF2
APC/C-mediated degradation of cell cycle proteins Homo sapiens R-HSA-174143	3/85	0.496365	1	0	0	1.13304	0.793629	ANAPC15;CUL1;CDC14A
Regulation of mitotic cell cycle Homo sapiens R-HSA-453276	3/85	0.496365	1	0	0	1.13304	0.793629	ANAPC15;CUL1;CDC14A
Intrinsic Pathway of Fibrin Clot Formation Homo sapiens R-HSA-140837	1/22	0.501709	1	0	0	1.45921	1.00647	VWF
Cyclin A/B1 associated events during G2/M transition Homo sapiens R-HSA-69273	1/22	0.501709	1	0	0	1.45921	1.00647	CDK7
Post-chaperonin tubulin folding pathway Homo sapiens R-HSA-389977	1/22	0.501709	1	0	0	1.45921	1.00647	TBCE
ADP signalling through P2Y purinoceptor 12 Homo sapiens R-HSA-392170	1/22	0.501709	1	0	0	1.45921	1.00647	GNG7
G2/M Checkpoints Homo sapiens R-HSA-69481	5/150	0.502726	1	0	0	1.07009	0.735913	RNF168;CHEK1;YWHAZ;YWHAG;MCM2
TCR signaling Homo sapiens R-HSA-202403	4/118	0.503411	1	0	0	1.08823	0.746905	ENAH;CUL1;TAB2;PTPRJ
Translation Homo sapiens R-HSA-72766	5/151	0.508602	1	0	0	1.063	0.718686	EEF1A1;EIF3H;RPSA;EEF2;EIF3A
ECM proteoglycans Homo sapiens R-HSA-3000178	2/55	0.514639	1	0	0	1.16737	0.775474	SPARC;NCAM1
GABA receptor activation Homo sapiens R-HSA-977443	2/55	0.514639	1	0	0	1.16737	0.775474	KCNJ6;GNG7
Laminin interactions Homo sapiens R-HSA-3000157	1/23	0.517248	1	0	0	1.39577	0.920139	LAMC2
RAF-independent MAPK1/3 activation Homo sapiens R-HSA-112409	1/23	0.517248	1	0	0	1.39577	0.920139	MAP2K1
APC/C:Cdc20 mediated degradation of Cyclin B Homo sapiens R-HSA-174048	1/23	0.517248	1	0	0	1.39577	0.920139	ANAPC15
Thromboxane signalling through TP receptor Homo sapiens R-HSA-428930	1/23	0.517248	1	0	0	1.39577	0.920139	GNG7
Branched-chain amino acid catabolism Homo sapiens R-HSA-70895	1/23	0.517248	1	0	0	1.39577	0.920139	BCAT1
Eukaryotic Translation Elongation Homo sapiens R-HSA-156842	3/89	0.52727	1	0	0	1.08211	0.6926	EEF1A1;RPSA;EEF2
Glutamate Neurotransmitter Release Cycle Homo sapiens R-HSA-210500	1/24	0.532303	1	0	0	1.33761	0.843423	RIMS1
Phosphorylation of CD3 and TCR zeta chains Homo sapiens R-HSA-202427	1/24	0.532303	1	0	0	1.33761	0.843423	PTPRJ
DARPP-32 events Homo sapiens R-HSA-180024	1/24	0.532303	1	0	0	1.33761	0.843423	PDE4D
Pyrimidine metabolism Homo sapiens R-HSA-73848	1/24	0.532303	1	0	0	1.33761	0.843423	TYMS
Cytosolic tRNA aminoacylation Homo sapiens R-HSA-379716	1/24	0.532303	1	0	0	1.33761	0.843423	DARS
PCP/CE pathway Homo sapiens R-HSA-4086400	3/91	0.542322	1	0	0	1.05833	0.647588	SMURF1;CLTC;ROR2
S Phase Homo sapiens R-HSA-69242	4/124	0.542524	1	0	0	1.03557	0.633277	CDK7;CUL1;PDS5A;MCM2
NIK-->noncanonical NF-kB signaling Homo sapiens R-HSA-5676590	2/58	0.54328	1	0	0	1.10699	0.675408	CUL1;RELB
G0 and Early G1 Homo sapiens R-HSA-1538133	1/25	0.546889	1	0	0	1.28411	0.774972	TFDP1
APC-Cdc20 mediated degradation of Nek2A Homo sapiens R-HSA-179409	1/25	0.546889	1	0	0	1.28411	0.774972	ANAPC15
TRP channels Homo sapiens R-HSA-3295583	1/25	0.546889	1	0	0	1.28411	0.774972	TRPM3
GLI3 is processed to GLI3R by the proteasome Homo sapiens R-HSA-5610785	2/59	0.552562	1	0	0	1.08823	0.645525	GSK3B;CUL1
Degradation of GLI2 by the proteasome Homo sapiens R-HSA-5610783	2/59	0.552562	1	0	0	1.08823	0.645525	GSK3B;CUL1
The role of GTSE1 in G2/M progression after G2 checkpoint Homo sapiens R-HSA-8852276	2/59	0.552562	1	0	0	1.08823	0.645525	HSP90AA1;HSP90AB1
Interferon gamma signaling Homo sapiens R-HSA-877300	3/93	0.557094	1	0	0	1.03557	0.605831	NCAM1;MID1;PTPN2
Asparagine N-linked glycosylation Homo sapiens R-HSA-446203	8/259	0.559761	1	0	0	0.99159	0.575365	CHST8;NSF;ANKRD28;COG5;ST8SIA1;ANK2;ANK3;SPTAN1
N-glycan antennae elongation in the medial/trans-Golgi Homo sapiens R-HSA-975576	1/26	0.561021	1	0	0	1.23472	0.713665	CHST8
Regulation of Hypoxia-inducible Factor (HIF) by oxygen Homo sapiens R-HSA-1234174	1/26	0.561021	1	0	0	1.23472	0.713665	CREBBP
Cellular response to hypoxia Homo sapiens R-HSA-2262749	1/26	0.561021	1	0	0	1.23472	0.713665	CREBBP
TNFR1-induced NFkappaB signaling pathway Homo sapiens R-HSA-5357956	1/26	0.561021	1	0	0	1.23472	0.713665	TAB2
Dectin-1 mediated noncanonical NF-kB signaling Homo sapiens R-HSA-5607761	2/61	0.570724	1	0	0	1.05255	0.590321	CUL1;RELB
Keratan sulfate biosynthesis Homo sapiens R-HSA-2022854	1/27	0.574713	1	0	0	1.18899	0.658563	B3GNT2
Interleukin-6 family signaling Homo sapiens R-HSA-6783589	1/27	0.574713	1	0	0	1.18899	0.658563	LIFR
Formation of a pool of free 40S subunits Homo sapiens R-HSA-72689	3/96	0.578707	1	0	0	1.00321	0.548715	EIF3H;RPSA;EIF3A
FCERI mediated Ca+2 mobilization Homo sapiens R-HSA-2871809	2/62	0.579603	1	0	0	1.03557	0.564814	ITPR1;SOS1
The role of Nef in HIV-1 replication and disease pathogenesis Homo sapiens R-HSA-164952	1/28	0.587979	1	0	0	1.14653	0.60888	AP1G1
G-protein activation Homo sapiens R-HSA-202040	1/28	0.587979	1	0	0	1.14653	0.60888	GNG7
Adrenaline,noradrenaline inhibits insulin secretion Homo sapiens R-HSA-400042	1/28	0.587979	1	0	0	1.14653	0.60888	GNG7
PIWI-interacting RNA (piRNA) biogenesis Homo sapiens R-HSA-5601884	1/29	0.600831	1	0	0	1.10699	0.563947	HSP90AA1
G1/S DNA Damage Checkpoints Homo sapiens R-HSA-69615	2/65	0.605424	1	0	0	0.987776	0.495692	CHEK1;MDM4
Ion channel transport Homo sapiens R-HSA-983712	6/203	0.608962	1	0	0	0.948849	0.470628	TTYH2;ATP2B4;SGK1;RAF1;TRPM3;ASIC1
Protein folding Homo sapiens R-HSA-391251	3/101	0.613217	1	0	0	0.953546	0.466319	CSNK2A1;GNG7;TBCE
Amine compound SLC transporters Homo sapiens R-HSA-425428	1/30	0.613283	1	0	0	1.07009	0.523198	SLC44A1
RNA Polymerase I Promoter Escape Homo sapiens R-HSA-73772	1/30	0.613283	1	0	0	1.07009	0.523198	CDK7
Termination of translesion DNA synthesis Homo sapiens R-HSA-5656169	1/30	0.613283	1	0	0	1.07009	0.523198	USP10
Activation of the pre-replicative complex Homo sapiens R-HSA-68962	1/30	0.613283	1	0	0	1.07009	0.523198	MCM2
Glucagon-type ligand receptors Homo sapiens R-HSA-420092	1/30	0.613283	1	0	0	1.07009	0.523198	GNG7
Transcription of the HIV genome Homo sapiens R-HSA-167172	2/67	0.62196	1	0	0	0.95829	0.455072	CDK7;RNGTT
Assembly of the pre-replicative complex Homo sapiens R-HSA-68867	2/67	0.62196	1	0	0	0.95829	0.455072	E2F3;MCM2
Disassembly of the destruction complex and recruitment of AXIN to the membrane Homo sapiens R-HSA-4641262	1/31	0.625347	1	0	0	1.03557	0.486147	GSK3B
Adherens junctions interactions Homo sapiens R-HSA-418990	1/31	0.625347	1	0	0	1.03557	0.486147	CDH4
MHC class II antigen presentation Homo sapiens R-HSA-2132295	3/103	0.626478	1	0	0	0.935031	0.43726	AP1G1;CLTC;SH3GL2
COPII (Coat Protein 2) Mediated Vesicle Transport Homo sapiens R-HSA-204005	2/68	0.630025	1	0	0	0.944198	0.436215	NSF;ANKRD28
Cyclin E associated events during G1/S transition Homo sapiens R-HSA-69202	2/68	0.630025	1	0	0	0.944198	0.436215	CDK7;CUL1
Keratan sulfate/keratin metabolism Homo sapiens R-HSA-1638074	1/32	0.637036	1	0	0	1.00321	0.452377	B3GNT2
Regulation of beta-cell development Homo sapiens R-HSA-186712	1/32	0.637036	1	0	0	1.00321	0.452377	RBPJ
RNA Polymerase I Transcription Termination Homo sapiens R-HSA-73863	1/32	0.637036	1	0	0	1.00321	0.452377	CDK7
DNA strand elongation Homo sapiens R-HSA-69190	1/32	0.637036	1	0	0	1.00321	0.452377	MCM2
TRAF6 mediated IRF7 activation Homo sapiens R-HSA-933541	1/32	0.637036	1	0	0	1.00321	0.452377	CREBBP
DAG and IP3 signaling Homo sapiens R-HSA-1489509	1/32	0.637036	1	0	0	1.00321	0.452377	ITPR1
Cyclin A:Cdk2-associated events at S phase entry Homo sapiens R-HSA-69656	2/69	0.637956	1	0	0	0.930514	0.418253	CDK7;CUL1
L13a-mediated translational silencing of Ceruloplasmin expression Homo sapiens R-HSA-156827	3/106	0.645776	1	0	0	0.908568	0.397319	EIF3H;RPSA;EIF3A
3' -UTR-mediated translational regulation Homo sapiens R-HSA-157279	3/106	0.645776	1	0	0	0.908568	0.397319	EIF3H;RPSA;EIF3A
Sialic acid metabolism Homo sapiens R-HSA-4085001	1/33	0.64836	1	0	0	0.97281	0.421527	ST8SIA1
Formation of the Early Elongation Complex Homo sapiens R-HSA-113418	1/33	0.64836	1	0	0	0.97281	0.421527	CDK7
Formation of the HIV-1 Early Elongation Complex Homo sapiens R-HSA-167158	1/33	0.64836	1	0	0	0.97281	0.421527	CDK7
Glucagon signaling in metabolic regulation Homo sapiens R-HSA-163359	1/33	0.64836	1	0	0	0.97281	0.421527	GNG7
GTP hydrolysis and joining of the 60S ribosomal subunit Homo sapiens R-HSA-72706	3/107	0.65205	1	0	0	0.900077	0.384904	EIF3H;RPSA;EIF3A
Mitotic Prometaphase Homo sapiens R-HSA-68877	3/107	0.65205	1	0	0	0.900077	0.384904	CSNK2A1;PDS5A;PAFAH1B1
Activated PKN1 stimulates transcription of AR (androgen receptor) regulated genes KLK2 and KLK3 Homo sapiens R-HSA-5625886	1/34	0.659332	1	0	0	0.944198	0.393285	KDM4C
Negative regulators of RIG-I/MDA5 signaling Homo sapiens R-HSA-936440	1/34	0.659332	1	0	0	0.944198	0.393285	UBE2K
EGFR interacts with phospholipase C-gamma Homo sapiens R-HSA-212718	1/34	0.659332	1	0	0	0.944198	0.393285	ITPR1
PLC-gamma1 signalling Homo sapiens R-HSA-167021	1/34	0.659332	1	0	0	0.944198	0.393285	ITPR1
Synthesis of PIPs at the plasma membrane Homo sapiens R-HSA-1660499	1/34	0.659332	1	0	0	0.944198	0.393285	PIP5K1B
Generation of second messenger molecules Homo sapiens R-HSA-202433	1/35	0.669962	1	0	0	0.917221	0.367379	ENAH
O-linked glycosylation Homo sapiens R-HSA-5173105	3/110	0.670392	1	0	0	0.875529	0.350117	GALNT2;C1GALT1;B3GNT2
Sphingolipid metabolism Homo sapiens R-HSA-428157	2/74	0.675611	1	0	0	0.867641	0.340235	SPTLC2;SGMS1
Binding and Uptake of Ligands by Scavenger Receptors Homo sapiens R-HSA-2173782	2/74	0.675611	1	0	0	0.867641	0.340235	HSP90AA1;SPARC
RHO GTPases Activate WASPs and WAVEs Homo sapiens R-HSA-5663213	1/36	0.68026	1	0	0	0.891742	0.34357	ARPC2
Metabolism of vitamins and cofactors Homo sapiens R-HSA-196854	4/148	0.681059	1	0	0	0.867641	0.333267	ALDH1L1;SLC2A3;NMNAT2;ACACB
Regulation of DNA replication Homo sapiens R-HSA-69304	2/75	0.682749	1	0	0	0.856073	0.326702	E2F3;MCM2
NCAM1 interactions Homo sapiens R-HSA-419037	1/37	0.690238	1	0	0	0.867641	0.321651	NCAM1
Cap-dependent Translation Initiation Homo sapiens R-HSA-72737	3/114	0.693732	1	0	0	0.844809	0.30892	EIF3H;RPSA;EIF3A
Eukaryotic Translation Initiation Homo sapiens R-HSA-72613	3/114	0.693732	1	0	0	0.844809	0.30892	EIF3H;RPSA;EIF3A
RHO GTPases Activate Formins Homo sapiens R-HSA-5663220	3/114	0.693732	1	0	0	0.844809	0.30892	FMNL2;SRC;PAFAH1B1
Senescence-Associated Secretory Phenotype (SASP) Homo sapiens R-HSA-2559582	2/77	0.696637	1	0	0	0.833837	0.301424	ANAPC15;RPS6KA2
DNA Damage Recognition in GG-NER Homo sapiens R-HSA-5696394	1/38	0.699905	1	0	0	0.844809	0.301437	INO80
Glutathione conjugation Homo sapiens R-HSA-156590	1/38	0.699905	1	0	0	0.844809	0.301437	GSTA4
Formation of Fibrin Clot (Clotting Cascade) Homo sapiens R-HSA-140877	1/39	0.709271	1	0	0	0.823147	0.282766	VWF
Gamma carboxylation, hypusine formation and arylsulfatase activation Homo sapiens R-HSA-163841	1/39	0.709271	1	0	0	0.823147	0.282766	EEF2
NS1 Mediated Effects on Host Pathways Homo sapiens R-HSA-168276	1/39	0.709271	1	0	0	0.823147	0.282766	KPNA7
Presynaptic phase of homologous DNA pairing and strand exchange Homo sapiens R-HSA-5693616	1/39	0.709271	1	0	0	0.823147	0.282766	CHEK1
tRNA modification in the nucleus and cytosol Homo sapiens R-HSA-6782315	1/39	0.709271	1	0	0	0.823147	0.282766	QTRT1
Regulation of APC/C activators between G1/S and early anaphase Homo sapiens R-HSA-176408	2/79	0.710019	1	0	0	0.812727	0.278329	ANAPC15;CUL1
RIG-I/MDA5 mediated induction of IFN-alpha/beta pathways Homo sapiens R-HSA-168928	2/79	0.710019	1	0	0	0.812727	0.278329	CREBBP;UBE2K
Processing of DNA double-strand break ends Homo sapiens R-HSA-5693607	2/81	0.722904	1	0	0	0.79266	0.257202	RNF168;CHEK1
Peptide hormone metabolism Homo sapiens R-HSA-2980736	2/81	0.722904	1	0	0	0.79266	0.257202	EXOC4;RAB27A
Host Interactions with Influenza Factors Homo sapiens R-HSA-168253	1/41	0.727136	1	0	0	0.782993	0.249495	KPNA7
Condensation of Prophase Chromosomes Homo sapiens R-HSA-2299718	1/41	0.727136	1	0	0	0.782993	0.249495	MCPH1
TNF signaling Homo sapiens R-HSA-75893	1/41	0.727136	1	0	0	0.782993	0.249495	TAB2
Global Genome Nucleotide Excision Repair (GG-NER) Homo sapiens R-HSA-5696399	2/82	0.729163	1	0	0	0.782993	0.247315	CDK7;INO80
DNA Replication Pre-Initiation Homo sapiens R-HSA-69002	2/82	0.729163	1	0	0	0.782993	0.247315	E2F3;MCM2
M/G1 Transition Homo sapiens R-HSA-68874	2/82	0.729163	1	0	0	0.782993	0.247315	E2F3;MCM2
Glucose transport Homo sapiens R-HSA-70153	1/42	0.735653	1	0	0	0.764351	0.234653	SLC2A3
Homologous DNA Pairing and Strand Exchange Homo sapiens R-HSA-5693579	1/42	0.735653	1	0	0	0.764351	0.234653	CHEK1
tRNA Aminoacylation Homo sapiens R-HSA-379724	1/42	0.735653	1	0	0	0.764351	0.234653	DARS
HIV Transcription Elongation Homo sapiens R-HSA-167169	1/43	0.743905	1	0	0	0.746575	0.220869	CDK7
Tat-mediated elongation of the HIV-1 transcript Homo sapiens R-HSA-167246	1/43	0.743905	1	0	0	0.746575	0.220869	CDK7
Formation of HIV-1 elongation complex containing HIV-1 Tat Homo sapiens R-HSA-167200	1/43	0.743905	1	0	0	0.746575	0.220869	CDK7
Formation of Incision Complex in GG-NER Homo sapiens R-HSA-5696395	1/43	0.743905	1	0	0	0.746575	0.220869	CDK7
Vasopressin regulates renal water homeostasis via Aquaporins Homo sapiens R-HSA-432040	1/43	0.743905	1	0	0	0.746575	0.220869	GNG7
Amine ligand-binding receptors Homo sapiens R-HSA-375280	1/43	0.743905	1	0	0	0.746575	0.220869	ADRB3
RNA Polymerase II Transcription Homo sapiens R-HSA-73857	3/124	0.746575	1	0	0	0.776679	0.226992	CDK7;RNGTT;SRSF11
Hedgehog 'on' state Homo sapiens R-HSA-5632684	2/85	0.747224	1	0	0	0.755358	0.220104	SMURF1;CUL3
SUMOylation of DNA replication proteins Homo sapiens R-HSA-4615885	1/44	0.751899	1	0	0	0.729607	0.20805	TOP1
Formation of HIV elongation complex in the absence of HIV Tat Homo sapiens R-HSA-167152	1/44	0.751899	1	0	0	0.729607	0.20805	CDK7
RNA Polymerase II Transcription Elongation Homo sapiens R-HSA-75955	1/44	0.751899	1	0	0	0.729607	0.20805	CDK7
Formation of RNA Pol II elongation complex Homo sapiens R-HSA-112382	1/44	0.751899	1	0	0	0.729607	0.20805	CDK7
RNA Polymerase II HIV Promoter Escape Homo sapiens R-HSA-167162	1/44	0.751899	1	0	0	0.729607	0.20805	CDK7
RNA Polymerase II Promoter Escape Homo sapiens R-HSA-73776	1/44	0.751899	1	0	0	0.729607	0.20805	CDK7
RNA Polymerase II Transcription Initiation And Promoter Clearance Homo sapiens R-HSA-76042	1/44	0.751899	1	0	0	0.729607	0.20805	CDK7
RNA Polymerase II Transcription Initiation Homo sapiens R-HSA-75953	1/44	0.751899	1	0	0	0.729607	0.20805	CDK7
RNA Polymerase II Transcription Pre-Initiation And Promoter Opening Homo sapiens R-HSA-73779	1/44	0.751899	1	0	0	0.729607	0.20805	CDK7
HIV Transcription Initiation Homo sapiens R-HSA-167161	1/44	0.751899	1	0	0	0.729607	0.20805	CDK7
PLC beta mediated events Homo sapiens R-HSA-112043	1/44	0.751899	1	0	0	0.729607	0.20805	ITPR1
Inositol phosphate metabolism Homo sapiens R-HSA-1483249	1/44	0.751899	1	0	0	0.729607	0.20805	NUDT3
Unfolded Protein Response (UPR) Homo sapiens R-HSA-381119	2/86	0.753011	1	0	0	0.746575	0.211785	EXOSC5;ATF4
Cell junction organization Homo sapiens R-HSA-446728	2/86	0.753011	1	0	0	0.746575	0.211785	CDH4;LAMC2
SUMOylation of RNA binding proteins Homo sapiens R-HSA-4570464	1/45	0.759644	1	0	0	0.713394	0.196115	PHC1
G-protein mediated events Homo sapiens R-HSA-112040	1/45	0.759644	1	0	0	0.713394	0.196115	ITPR1
Infectious disease Homo sapiens R-HSA-5663205	9/348	0.759981	1	0	0	0.830243	0.22787	MAP2K1;CDK7;HSP90AA1;HSP90AB1;RNGTT;AP1G1;KPNA7;RPSA;EEF2
G alpha (z) signalling events Homo sapiens R-HSA-418597	1/46	0.767148	1	0	0	0.697885	0.184992	GNG7
TP53 Regulates Transcription of Cell Cycle Genes Homo sapiens R-HSA-6791312	1/48	0.781462	1	0	0	0.668807	0.16492	TFDP1
Hexose transport Homo sapiens R-HSA-189200	1/48	0.781462	1	0	0	0.668807	0.16492	SLC2A3
Death Receptor Signalling Homo sapiens R-HSA-73887	1/48	0.781462	1	0	0	0.668807	0.16492	TAB2
G beta:gamma signalling through PI3Kgamma Homo sapiens R-HSA-392451	1/48	0.781462	1	0	0	0.668807	0.16492	GNG7
Extracellular matrix organization Homo sapiens R-HSA-1474244	7/283	0.782121	1	0	0	0.79406	0.195137	SPARC;FN1;PECAM1;PDGFA;LAMC2;NCAM1;JAM2
mRNA Splicing - Major Pathway Homo sapiens R-HSA-72163	3/134	0.791877	1	0	0	0.718718	0.167712	HSPA8;CDC5L;SRSF11
Deadenylation-dependent mRNA decay Homo sapiens R-HSA-429914	1/50	0.794897	1	0	0	0.642055	0.147379	EXOSC5
Cardiac conduction Homo sapiens R-HSA-5576891	3/135	0.796014	1	0	0	0.713394	0.162752	ITPR1;ATP2B4;HIPK1
TNFR2 non-canonical NF-kB pathway Homo sapiens R-HSA-5668541	2/95	0.800122	1	0	0	0.675847	0.150708	CUL1;RELB
Chaperonin-mediated protein folding Homo sapiens R-HSA-390466	2/95	0.800122	1	0	0	0.675847	0.150708	CSNK2A1;GNG7
mRNA 3'-end processing Homo sapiens R-HSA-72187	1/51	0.801302	1	0	0	0.629465	0.139438	SRSF11
Post-Elongation Processing of Intron-Containing pre-mRNA Homo sapiens R-HSA-112296	1/51	0.801302	1	0	0	0.629465	0.139438	SRSF11
Cargo trafficking to the periciliary membrane Homo sapiens R-HSA-5620920	1/51	0.801302	1	0	0	0.629465	0.139438	EXOC4
G-protein beta:gamma signalling Homo sapiens R-HSA-397795	1/51	0.801302	1	0	0	0.629465	0.139438	GNG7
Aquaporin-mediated transport Homo sapiens R-HSA-445717	1/51	0.801302	1	0	0	0.629465	0.139438	GNG7
Nuclear Receptor transcription pathway Homo sapiens R-HSA-383280	1/51	0.801302	1	0	0	0.629465	0.139438	ESRRB
Nonhomologous End-Joining (NHEJ) Homo sapiens R-HSA-5693571	1/52	0.807507	1	0	0	0.61736	0.131994	RNF168
p53-Independent DNA Damage Response Homo sapiens R-HSA-69610	1/52	0.807507	1	0	0	0.61736	0.131994	CHEK1
p53-Independent G1/S DNA damage checkpoint Homo sapiens R-HSA-69613	1/52	0.807507	1	0	0	0.61736	0.131994	CHEK1
Ubiquitin Mediated Degradation of Phosphorylated Cdc25A Homo sapiens R-HSA-69601	1/52	0.807507	1	0	0	0.61736	0.131994	CHEK1
Formation of TC-NER Pre-Incision Complex Homo sapiens R-HSA-6781823	1/53	0.813519	1	0	0	0.605712	0.125011	CDK7
Arachidonic acid metabolism Homo sapiens R-HSA-2142753	1/53	0.813519	1	0	0	0.605712	0.125011	PTGES
Downstream TCR signaling Homo sapiens R-HSA-202424	2/99	0.818378	1	0	0	0.64854	0.129987	CUL1;TAB2
Hedgehog 'off' state Homo sapiens R-HSA-5610787	2/99	0.818378	1	0	0	0.64854	0.129987	GSK3B;CUL1
Resolution of Sister Chromatid Cohesion Homo sapiens R-HSA-2500257	2/99	0.818378	1	0	0	0.64854	0.129987	PDS5A;PAFAH1B1
Potassium Channels Homo sapiens R-HSA-1296071	2/99	0.818378	1	0	0	0.64854	0.129987	KCNJ6;GNG7
Assembly of collagen fibrils and other multimeric structures Homo sapiens R-HSA-2022090	1/54	0.819343	1	0	0	0.594495	0.118455	LAMC2
SCF-beta-TrCP mediated degradation of Emi1 Homo sapiens R-HSA-174113	1/54	0.819343	1	0	0	0.594495	0.118455	CUL1
Stabilization of p53 Homo sapiens R-HSA-69541	1/54	0.819343	1	0	0	0.594495	0.118455	MDM4
AUF1 (hnRNP D0) binds and destabilizes mRNA Homo sapiens R-HSA-450408	1/54	0.819343	1	0	0	0.594495	0.118455	HSPA8
Factors involved in megakaryocyte development and platelet production Homo sapiens R-HSA-983231	3/141	0.819416	1	0	0	0.683037	0.136036	CREBBP;CAPZB;JMJD1C
G alpha (s) signalling events Homo sapiens R-HSA-418555	3/142	0.823086	1	0	0	0.678227	0.132047	ADRB3;PDE4D;GNG7
Ion transport by P-type ATPases Homo sapiens R-HSA-936837	1/55	0.824985	1	0	0	0.583686	0.112295	ATP2B4
Transport of glucose and other sugars, bile salts and organic acids, metal ions and amine compounds Homo sapiens R-HSA-425366	2/101	0.826935	1	0	0	0.635698	0.120801	SLC44A1;SLC2A3
mRNA Splicing Homo sapiens R-HSA-72172	3/144	0.830236	1	0	0	0.668807	0.124429	HSPA8;CDC5L;SRSF11
Degradation of DVL Homo sapiens R-HSA-4641258	1/56	0.830452	1	0	0	0.573263	0.106504	CUL3
Chemokine receptors bind chemokines Homo sapiens R-HSA-380108	1/56	0.830452	1	0	0	0.573263	0.106504	CX3CR1
RNA Polymerase I Chain Elongation Homo sapiens R-HSA-73777	1/57	0.835748	1	0	0	0.563206	0.101055	CDK7
Influenza Infection Homo sapiens R-HSA-168254	3/147	0.840495	1	0	0	0.655158	0.113843	HSP90AA1;KPNA7;RPSA
B-WICH complex positively regulates rRNA expression Homo sapiens R-HSA-5250924	1/58	0.840879	1	0	0	0.553495	0.0959247	GSK3B
Recruitment and ATM-mediated phosphorylation of repair and signaling proteins at DNA double strand breaks Homo sapiens R-HSA-5693565	1/58	0.840879	1	0	0	0.553495	0.0959247	RNF168
DNA Replication Homo sapiens R-HSA-69306	2/105	0.842968	1	0	0	0.611481	0.104457	E2F3;MCM2
M Phase Homo sapiens R-HSA-68886	6/268	0.844626	1	0	0	0.718718	0.121364	NIPBL;ANAPC15;CSNK2A1;PDS5A;PAFAH1B1;MCPH1
DNA Double Strand Break Response Homo sapiens R-HSA-5693606	1/59	0.84585	1	0	0	0.544114	0.0910917	RNF168
Degradation of GLI1 by the proteasome Homo sapiens R-HSA-5610780	1/59	0.84585	1	0	0	0.544114	0.0910917	CUL1
SCF(Skp2)-mediated degradation of p27/p21 Homo sapiens R-HSA-187577	1/59	0.84585	1	0	0	0.544114	0.0910917	CUL1
Nonsense-Mediated Decay (NMD) Homo sapiens R-HSA-927802	2/106	0.84676	1	0	0	0.605712	0.100753	RPSA;SMG5
Nonsense Mediated Decay (NMD) enhanced by the Exon Junction Complex (EJC) Homo sapiens R-HSA-975957	2/106	0.84676	1	0	0	0.605712	0.100753	RPSA;SMG5
Cleavage of Growing Transcript in the Termination Region Homo sapiens R-HSA-109688	1/60	0.850666	1	0	0	0.535045	0.0865358	SRSF11
RNA Polymerase II Transcription Termination Homo sapiens R-HSA-73856	1/60	0.850666	1	0	0	0.535045	0.0865358	SRSF11
Post-Elongation Processing of the Transcript Homo sapiens R-HSA-76044	1/60	0.850666	1	0	0	0.535045	0.0865358	SRSF11
Role of phospholipids in phagocytosis Homo sapiens R-HSA-2029485	1/60	0.850666	1	0	0	0.535045	0.0865358	ITPR1
PI Metabolism Homo sapiens R-HSA-1483255	1/60	0.850666	1	0	0	0.535045	0.0865358	PIP5K1B
Nucleotide Excision Repair Homo sapiens R-HSA-5696398	2/108	0.854096	1	0	0	0.594495	0.0937591	CDK7;INO80
Cell-cell junction organization Homo sapiens R-HSA-421270	1/61	0.855332	1	0	0	0.526274	0.0822386	CDH4
Processing of Capped Intron-Containing Pre-mRNA Homo sapiens R-HSA-72203	4/193	0.855337	1	0	0	0.665342	0.103966	HSPA8;WTAP;CDC5L;SRSF11
Diseases associated with O-glycosylation of proteins Homo sapiens R-HSA-3906995	1/62	0.859852	1	0	0	0.517786	0.078183	C1GALT1
Gap-filling DNA repair synthesis and ligation in TC-NER Homo sapiens R-HSA-6782210	1/62	0.859852	1	0	0	0.517786	0.078183	CDK7
Autodegradation of Cdh1 by Cdh1:APC/C Homo sapiens R-HSA-174084	1/62	0.859852	1	0	0	0.517786	0.078183	ANAPC15
Synthesis of substrates in N-glycan biosythesis Homo sapiens R-HSA-446219	1/63	0.864231	1	0	0	0.509567	0.0743535	ST8SIA1
Dual incision in TC-NER Homo sapiens R-HSA-6782135	1/63	0.864231	1	0	0	0.509567	0.0743535	CDK7
p53-Dependent G1/S DNA damage checkpoint Homo sapiens R-HSA-69580	1/63	0.864231	1	0	0	0.509567	0.0743535	MDM4
p53-Dependent G1 DNA Damage Response Homo sapiens R-HSA-69563	1/63	0.864231	1	0	0	0.509567	0.0743535	MDM4
Asymmetric localization of PCP proteins Homo sapiens R-HSA-4608870	1/63	0.864231	1	0	0	0.509567	0.0743535	SMURF1
Selenoamino acid metabolism Homo sapiens R-HSA-2408522	2/111	0.8645	1	0	0	0.578428	0.0842215	DARS;RPSA
FCERI mediated NF-kB activation Homo sapiens R-HSA-2871837	2/111	0.8645	1	0	0	0.578428	0.0842215	CUL1;TAB2
HDR through Homologous Recombination (HR) or Single Strand Annealing (SSA) Homo sapiens R-HSA-5693567	2/112	0.867814	1	0	0	0.573263	0.081276	RNF168;CHEK1
RNA Polymerase II Pre-transcription Events Homo sapiens R-HSA-674695	1/64	0.868474	1	0	0	0.501605	0.0707353	CDK7
HDR through Homologous Recombination (HRR) Homo sapiens R-HSA-5685942	1/64	0.868474	1	0	0	0.501605	0.0707353	CHEK1
Hedgehog ligand biogenesis Homo sapiens R-HSA-5358346	1/64	0.868474	1	0	0	0.501605	0.0707353	HHAT
APC/C:Cdc20 mediated degradation of Securin Homo sapiens R-HSA-174154	1/66	0.876566	1	0	0	0.486405	0.0640807	ANAPC15
Activation of NF-kappaB in B cells Homo sapiens R-HSA-1169091	1/66	0.876566	1	0	0	0.486405	0.0640807	CUL1
Cytosolic sensors of pathogen-associated DNA Homo sapiens R-HSA-1834949	1/66	0.876566	1	0	0	0.486405	0.0640807	CREBBP
DNA Repair Homo sapiens R-HSA-73894	6/285	0.882337	1	0	0	0.675847	0.0846032	RNF168;CDK7;USP10;CHEK1;REV3L;INO80
Separation of Sister Chromatids Homo sapiens R-HSA-2467813	3/162	0.884103	1	0	0	0.594495	0.0732312	ANAPC15;PDS5A;PAFAH1B1
Transport of Mature mRNA derived from an Intron-Containing Transcript Homo sapiens R-HSA-159236	1/68	0.884161	1	0	0	0.472099	0.0581232	SRSF11
Interferon alpha/beta signaling Homo sapiens R-HSA-909733	1/68	0.884161	1	0	0	0.472099	0.0581232	EGR1
Homology Directed Repair Homo sapiens R-HSA-5693538	2/118	0.886182	1	0	0	0.544114	0.0657468	RNF168;CHEK1
Switching of origins to a post-replicative state Homo sapiens R-HSA-69052	1/70	0.891289	1	0	0	0.45861	0.0527799	MCM2
Orc1 removal from chromatin Homo sapiens R-HSA-68949	1/70	0.891289	1	0	0	0.45861	0.0527799	MCM2
APC/C:Cdh1 mediated degradation of Cdc20 and other APC/C:Cdh1 targeted proteins in late mitosis/early G1 Homo sapiens R-HSA-174178	1/71	0.894687	1	0	0	0.452151	0.0503159	ANAPC15
Cdc20:Phospho-APC/C mediated degradation of Cyclin A Homo sapiens R-HSA-174184	1/71	0.894687	1	0	0	0.452151	0.0503159	ANAPC15
APC:Cdc20 mediated degradation of cell cycle proteins prior to satisfation of the cell cycle checkpoint Homo sapiens R-HSA-179419	1/72	0.897979	1	0	0	0.445871	0.0479794	ANAPC15
Removal of licensing factors from origins Homo sapiens R-HSA-69300	1/72	0.897979	1	0	0	0.445871	0.0479794	MCM2
NoRC negatively regulates rRNA expression Homo sapiens R-HSA-427413	1/73	0.901169	1	0	0	0.439763	0.045763	CDK7
Transport of Mature Transcript to Cytoplasm Homo sapiens R-HSA-72202	1/74	0.904258	1	0	0	0.433821	0.0436597	SRSF11
APC/C:Cdc20 mediated degradation of mitotic proteins Homo sapiens R-HSA-176409	1/74	0.904258	1	0	0	0.433821	0.0436597	ANAPC15
Activation of APC/C and APC/C:Cdc20 mediated degradation of mitotic proteins Homo sapiens R-HSA-176814	1/75	0.907252	1	0	0	0.428036	0.041663	ANAPC15
Mitotic Anaphase Homo sapiens R-HSA-68882	3/173	0.908982	1	0	0	0.556695	0.0531254	ANAPC15;PDS5A;PAFAH1B1
Negative epigenetic regulation of rRNA expression Homo sapiens R-HSA-5250941	1/76	0.910152	1	0	0	0.422404	0.0397668	CDK7
Transcription-Coupled Nucleotide Excision Repair (TC-NER) Homo sapiens R-HSA-6781827	1/76	0.910152	1	0	0	0.422404	0.0397668	CDK7
Mitotic Metaphase and Anaphase Homo sapiens R-HSA-2555396	3/174	0.910985	1	0	0	0.553495	0.0516016	ANAPC15;PDS5A;PAFAH1B1
Late Phase of HIV Life Cycle Homo sapiens R-HSA-162599	2/128	0.911626	1	0	0	0.501605	0.0464114	CDK7;RNGTT
Influenza Viral RNA Transcription and Replication Homo sapiens R-HSA-168273	2/128	0.911626	1	0	0	0.501605	0.0464114	HSP90AA1;RPSA
Biosynthesis of the N-glycan precursor (dolichol lipid-linked oligosaccharide, LLO) and transfer to a nascent protein Homo sapiens R-HSA-446193	1/78	0.915683	1	0	0	0.411573	0.0362535	ST8SIA1
Metabolism Homo sapiens R-HSA-1430728	50/1908	0.918343	1	0	0	0.841266	0.071663	ALDH1L1;SLC44A1;PRKAG2;SLC2A3;ENO1;NUDT3;NDST1;SPTLC2;LYPLA1;HSP90AA1;NCOA3;ACSL6;NOSIP;ELOVL6;RPSA;NCOR2;NCOR1;TBL1XR1;AGPS;B3GNT2;BCAT1;SLC25A12;TNFRSF21;PTGES;CEMIP;DDC;PFKFB3;SGMS1;ITPR1;IQGAP1;NRF1;TYMS;ACACB;COX5A;PHKG1;GNG7;SCAP;PIP5K1B;TBL1X;ACSS1;DARS;CREBBP;AGK;UROS;IDH1;HS3ST5;NMNAT2;MED13L;EXT1;GSTA4
COPI-dependent Golgi-to-ER retrograde traffic Homo sapiens R-HSA-6811434	1/81	0.923349	1	0	0	0.39633	0.0316067	NSF
Antigen processing-Cross presentation Homo sapiens R-HSA-1236975	1/82	0.925746	1	0	0	0.391497	0.0302061	LNPEP
Influenza Life Cycle Homo sapiens R-HSA-168255	2/136	0.928035	1	0	0	0.472099	0.0352591	HSP90AA1;RPSA
Viral mRNA Translation Homo sapiens R-HSA-192823	1/84	0.930318	1	0	0	0.382175	0.027604	RPSA
Class B/2 (Secretin family receptors) Homo sapiens R-HSA-373080	1/84	0.930318	1	0	0	0.382175	0.027604	GNG7
Mitochondrial translation initiation Homo sapiens R-HSA-5368286	1/84	0.930318	1	0	0	0.382175	0.027604	MRPS31
Mitochondrial translation termination Homo sapiens R-HSA-5419276	1/84	0.930318	1	0	0	0.382175	0.027604	MRPS31
Mitochondrial translation elongation Homo sapiens R-HSA-5389840	1/84	0.930318	1	0	0	0.382175	0.027604	MRPS31
Collagen formation Homo sapiens R-HSA-1474290	1/85	0.932498	1	0	0	0.377679	0.0263954	LAMC2
Selenocysteine synthesis Homo sapiens R-HSA-2408557	1/87	0.936655	1	0	0	0.368997	0.0241472	RPSA
Eukaryotic Translation Termination Homo sapiens R-HSA-72764	1/87	0.936655	1	0	0	0.368997	0.0241472	RPSA
Metabolism of nucleotides Homo sapiens R-HSA-15869	1/87	0.936655	1	0	0	0.368997	0.0241472	TYMS
HIV Life Cycle Homo sapiens R-HSA-162587	2/141	0.936783	1	0	0	0.455358	0.0297365	CDK7;RNGTT
Diseases of glycosylation Homo sapiens R-HSA-3781865	1/88	0.938637	1	0	0	0.364804	0.0231017	C1GALT1
Respiratory electron transport Homo sapiens R-HSA-611105	1/88	0.938637	1	0	0	0.364804	0.0231017	COX5A
G alpha (q) signalling events Homo sapiens R-HSA-416476	3/191	0.939434	1	0	0	0.504231	0.031503	DGKG;GNG7;ITPR1
Nonsense Mediated Decay (NMD) independent of the Exon Junction Complex (EJC) Homo sapiens R-HSA-975956	1/89	0.940557	1	0	0	0.360705	0.0221052	RPSA
Mitochondrial translation Homo sapiens R-HSA-5368287	1/90	0.942417	1	0	0	0.356697	0.0211549	MRPS31
DNA Double-Strand Break Repair Homo sapiens R-HSA-5693532	2/145	0.943046	1	0	0	0.442796	0.0259658	RNF168;CHEK1
Phase 1 - Functionalization of compounds Homo sapiens R-HSA-211945	1/92	0.945964	1	0	0	0.348943	0.0193841	ACSS1
Synthesis of DNA Homo sapiens R-HSA-69239	1/97	0.953906	1	0	0	0.330956	0.0156177	MCM2
Phase II conjugation Homo sapiens R-HSA-156580	1/100	0.958101	1	0	0	0.321027	0.0137407	GSTA4
Glycerophospholipid biosynthesis Homo sapiens R-HSA-1483206	1/102	0.960683	1	0	0	0.314733	0.0126241	SLC44A1
tRNA processing Homo sapiens R-HSA-72306	1/103	0.961914	1	0	0	0.311677	0.0121025	QTRT1
Phospholipid metabolism Homo sapiens R-HSA-1483257	2/161	0.962671	1	0	0	0.398792	0.0151713	SLC44A1;PIP5K1B
Degradation of the extracellular matrix Homo sapiens R-HSA-1474228	1/106	0.965381	1	0	0	0.302856	0.0106704	LAMC2
Mitotic Prophase Homo sapiens R-HSA-68875	1/107	0.966465	1	0	0	0.300026	0.010234	MCPH1
SRP-dependent cotranslational protein targeting to membrane Homo sapiens R-HSA-1799339	1/107	0.966465	1	0	0	0.300026	0.010234	RPSA
Major pathway of rRNA processing in the nucleolus Homo sapiens R-HSA-6791226	2/166	0.967339	1	0	0	0.38678	0.0128434	EXOSC5;RPSA
Respiratory electron transport, ATP synthesis by chemiosmotic coupling, and heat production by uncoupling proteins. Homo sapiens R-HSA-163200	1/109	0.968532	1	0	0	0.29452	0.00941684	COX5A
SLC-mediated transmembrane transport Homo sapiens R-HSA-425407	4/268	0.969262	1	0	0	0.479145	0.0149591	SLC44A1;SLCO2A1;SLC2A3;SLC28A1
HIV Infection Homo sapiens R-HSA-162906	3/222	0.97084	1	0	0	0.433821	0.0128384	CDK7;RNGTT;AP1G1
rRNA processing Homo sapiens R-HSA-72312	2/180	0.977611	1	0	0	0.356697	0.00807701	EXOSC5;RPSA
Signaling by GPCR Homo sapiens R-HSA-372790	29/1293	0.978491	1	0	0	0.720015	0.015656	DGKG;CX3CR1;SRC;CUL3;ITPR1;PDGFA;IQGAP1;FGF1;FGF4;ABR;SPRED2;GNG7;RPS6KA2;NCAM1;SPTAN1;MAP2K1;KSR1;VWF;PDE4D;FN1;DAB2IP;IL17RD;TIAM1;ADRB3;KIT;ARHGEF3;SOS1;RAF1;FGFR2
Transmembrane transport of small molecules Homo sapiens R-HSA-382551	11/594	0.979375	1	0	0	0.594495	0.0123898	TTYH2;SLC44A1;GNG7;SLCO2A1;ATP2B4;SLC2A3;SGK1;RAF1;SLC28A1;TRPM3;ASIC1
Host Interactions of HIV factors Homo sapiens R-HSA-162909	1/129	0.983352	1	0	0	0.248858	0.00417785	AP1G1
Biological oxidations Homo sapiens R-HSA-211859	2/199	0.986687	1	0	0	0.32264	0.00432413	GSTA4;ACSS1
The citric acid (TCA) cycle and respiratory electron transport Homo sapiens R-HSA-1428517	1/153	0.992251	1	0	0	0.209822	0.00163216	COX5A
Metabolism of amino acids and derivatives Homo sapiens R-HSA-71291	4/335	0.993451	1	0	0	0.383316	0.0025187	DARS;DDC;RPSA;BCAT1
Peptide ligand-binding receptors Homo sapiens R-HSA-375276	1/193	0.997837	1	0	0	0.166335	0.00036015	CX3CR1
G alpha (i) signalling events Homo sapiens R-HSA-418594	1/240	0.999517	1	0	0	0.133761	6.46363e-05	GNG7
Class A/1 (Rhodopsin-like receptors) Homo sapiens R-HSA-373076	2/323	0.99961	1	0	0	0.198779	7.74959e-05	CX3CR1;ADRB3
GPCR ligand binding Homo sapiens R-HSA-500792	3/447	0.999921	1	0	0	0.215455	1.70564e-05	CX3CR1;ADRB3;GNG7
GPCR downstream signaling Homo sapiens R-HSA-388396	9/983	0.999995	1	0	0	0.293921	1.58991e-06	DGKG;ABR;TIAM1;ADRB3;GNG7;PDE4D;ITPR1;ARHGEF3;SOS1

## Sheet: ARCHS4 Tissues
Term	Overlap	P-value	Adjusted P-value	Old P-value	Old Adjusted P-value	Odds Ratio	Combined Score	Genes
NEURONAL EPITHELIUM	137/2316	4.67556e-14	5.0496e-12	0	0	1.899	58.2875	FHOD3;TCERG1;PGAP1;SPARC;UBXN2A;DENND5B;ZMYND8;JMJD1C;MSI2;RBPJ;NUDT3;IGF1R;EPS8;GJA1;CDH4;SALL1;SALL4;CHEK1;SOX5;EPHA4;CSNK2A1;ANKRD45;NSMCE2;ACSL6;ANK2;LIFR;FRMD4B;ANK3;FBXO11;MID1;PIAS2;CFDP1;PRKD3;KAT6B;TBL1XR1;RAI14;ANKRD17;MACF1;ANAPC15;CDCA3;KMT2C;BAZ2B;RTN4;DPP6;HMGXB4;FUT9;PDGFC;PRDM16;TSPAN5;SRGAP3;SMAD2;POU2F1;AUTS2;ST8SIA1;IDH1;FBXO36;POU2F3;PRRC2B;SRPK1;PCDHGA10;NASP;AGO1;AGO2;FAT1;M…
PREFRONTAL CORTEX	120/2316	1.05972e-08	5.72251e-07	0	0	1.66335	30.5436	DGKG;FHOD3;TCERG1;ALDH1L1;PGAP1;DENND5B;ZMYND8;JMJD1C;FGF1;NUDT3;IGF1R;EPS8;RIMS2;RIMS1;CDH4;SALL1;LARGE1;SH3GL2;SOX5;EPHA4;GUCY1A2;ACSL6;ANK2;LIFR;FRMD4B;ANK3;FBXO11;SRCIN1;PIAS2;KAT6B;TBL1XR1;IGSF3;KMT2C;PDGFA;BAZ2B;RTN4;ATXN2;DPP6;EPB41L1;FUT9;PRDM16;TSPAN5;SRGAP3;TRPM3;ASIC1;EGR1;POU2F1;AUTS2;ST8SIA1;POU2F3;PRRC2B;PCDHGA10;NASP;FGFR2;BMPR1A;TENM4;SLC44A1;GRIK3;GRIK4;PTPRK;SIPA1L2;PPP1R9A;BICD…
PLACENTA (BULK)	111/2316	2.1583e-06	7.76987e-05	0	0	1.5386	20.0729	SPARC;WWC1;IGF1R;GJA1;TNS3;TNS1;GUCY1A2;RPSA;LIFR;ACTN4;ANK3;CDYL;TMEM131;CD2AP;ADAM19;SLCO2A1;SIK3;ALPK3;ULK1;KANK4;RAI14;MACF1;IGSF3;CUL3;KMT2C;ARHGAP17;IQGAP1;DDX60;EPB41L1;TSPAN9;PIP5K1B;RAP1GAP2;CREBBP;IQSEC1;SMURF1;FN1;LNPEP;POU2F3;PRRC2B;MED13L;ARHGAP23;ICK;DNMBP;STK24;AGO2;FAT1;PGPEP1L;PHF3;TENM3;SLC44A1;PCDHGB5;HSPB8;CLTC;PTPRJ;PTPRK;ARHGAP5;LITAF;SMG5;PTPRG;AKAP12;NIPBL;NHSL1;SH3PXD2A;A…
FETAL BRAIN CORTEX	100/2316	0.00042701	0.0115293	0	0	1.38613	10.7546	TCERG1;PGAP1;UBXN2A;DENND5B;ZMYND8;RBPJ;NUDT3;IGF1R;EPC1;LARGE1;SH3GL2;SOX5;EPHA4;GUCY1A2;ACSL6;ANK2;FRMD4B;ANK3;SRCIN1;MID1;PIAS2;CFDP1;KAT6B;TBL1XR1;RAI14;ANAPC15;CDCA3;IGSF3;KMT2C;PDGFA;BAZ2B;RTN4;DPP6;FUT9;PDGFC;VTI1A;TSPAN5;SRGAP3;TRPM3;SMAD2;AUTS2;ST8SIA1;IDH1;POU2F3;PRRC2B;NASP;AGO1;MDM4;FGFR2;BMPR1A;TENM4;GRIK3;PPP1R9A;BICD1;AKAP12;EPB41L4A;NHSL1;KCNT2;REV3L;TLK1;ARIH1;ERC2;SPTAN1;YWHAG;S…
HUMAN EMBRYO	98/2316	0.000962982	0.0208004	0	0	1.35841	9.43477	PGAP1;WWC1;ENO1;FGF4;RIMS2;GJA1;SALL1;SALL4;CHEK1;LARGE1;ARL6IP6;CSNK2A1;ANK2;LIFR;CDYL;MID1;CD2AP;TRAIP;CFDP1;RAI14;CDCA3;IGSF3;HMGXB4;FUT9;ZMAT4;RHPN2;PATZ1;CCDC141;TRPM3;PHC1;YES1;POU2F1;AUTS2;IDH1;BTBD11;GDF3;MCC;SRPK1;CDK7;DNMBP;NASP;AGO1;TBCE;FAT1;SAE1;UBE2K;XKR6;FGFR2;CCNJL;TRIM71;HSP90AB1;TENM3;HIP1;PCDHGB6;BNC2;SLC2A3;PTPRK;PPP1R9A;PTPRG;AKAP12;NHSL1;KCNT2;JARID2;ERC2;CHST8;TGIF1;DNMT3A;…
ASTROCYTE	97/2316	0.00142113	0.0255803	0	0	1.34454	8.81524	FHOD3;SPARC;FGF1;EPS8;NDST1;GJA1;CDH4;HHAT;YY2;SALL1;RPS6KA2;PKNOX2;GUCY1A2;LIFR;MID1;ADAM19;TANC1;RAB31;ROR2;TLN2;KANK4;RAI14;CEMIP;IGSF3;GLIS3;CTIF;EPB41L1;TSPAN9;PDGFC;PRDM16;TSPAN5;ASIC1;FN1;EEF2;ARHGAP23;EXT1;PCDHGA11;RCAN1;PCDHGA12;DNMBP;FAT1;CCNJL;PCDHGB7;TENM3;PCDHGB6;BNC2;TENM4;PCDHGB5;PCDHGB4;HSPB8;PCDHGB2;GRIK3;GRIK4;PTPRK;SHB;PTPRG;AKAP12;SPRED2;KCNT2;XXYLT1;CFAP43;PCDHGA7;PLEKHG1;PCD…
FIBROBLAST	96/2316	0.00207288	0.0319816	0	0	1.33068	8.22205	FHOD3;PCDHGB7;SPARC;TENM3;MAML2;BNC2;PCDHGB5;PCDHGB4;HSPB8;PCDHGB2;PTPRK;SHB;FGF1;PTPRG;EPS8;AKAP12;NDST1;SPRED2;GJA1;CDH4;YY2;SALL1;SH3PXD2A;RPS6KA2;ANXA6;PIEZO1;XXYLT1;TNS3;DLGAP4;TNS1;KIRREL3;PCDHGA7;PCDHGA5;PCDHGA4;PCDHGA3;PCDHGA2;SHROOM3;LIFR;NAV1;ACTN4;MID1;ETV5;PCDHGA9;ADAM19;TANC1;PALLD;PCDHGB1;MYH9;ROR2;TRIM16;TLN2;SGK1;CUEDC1;PTGES;RAI14;CEMIP;AHNAK;PALM2;GLIS3;AKAP2;FAM129B;CTIF;EPB41L…
CEREBELLUM	94/2316	0.00425755	0.057477	0	0	1.30296	7.11294	DGKG;FHOD3;PCDHGB7;PGAP1;TENM3;PCDHGB6;TENM4;PCDHGB5;PCDHGB2;GRIK3;PTPRK;FGF1;ARHGAP5;SIPA1L2;PPP1R9A;BICD1;PTPRG;EPS8;RIMS2;RIMS1;CDH4;GLT1D1;KCNT2;TRPS1;ERC2;CFAP43;SH3GL2;SOX5;CHST8;PCDHGA8;GUCY1A2;PCDHGA7;KLF12;PLEKHG1;PCDHGA6;PCDHGA5;VWF;PCDHGA4;PCDHGA3;PCDHGA2;PDE4D;EBF1;GAB1;SHROOM3;ANK2;LIFR;ANK3;IL17RD;SRCIN1;PCDHGA9;TANC1;TIAM1;KATNAL2;KIT;PCDHGB1;ROR2;TLN2;MAPT;RAPGEF5;CX3CR1;CEMIP;IGS…
SPINAL CORD	94/2316	0.00425755	0.0510906	0	0	1.30296	7.11294	FHOD3;PCDHGB7;TENM3;PCDHGB6;TENM4;PCDHGB5;PCDHGB4;PCDHGB2;GRIK3;GRIK4;FGF1;SIPA1L2;PPP1R9A;PTPRG;AKAP12;RIMS1;GJA1;CDH4;SALL1;KCNT2;CRTAC1;PRX;ERC2;CFAP43;SPTAN1;SH3GL2;PKNOX2;SOX5;CHST8;EPHA4;GUCY1A2;PCDHGA7;PLEKHG1;PCDHGA5;VWF;PCDHGA4;PCDHGA3;PCDHGA2;EBF1;ANK2;LIFR;IL17RD;SRCIN1;SYN1;PCDHGA9;PCDHGB1;ROR2;TLN2;MAPT;RAPGEF5;CUEDC1;KANK4;TTYH2;IGSF3;PALM2;TSHZ2;PRTG;STOX2;CTIF;CECR2;ARVCF;EPB41L1;…
SPINAL CORD (BULK)	94/2316	0.00425755	0.0459816	0	0	1.30296	7.11294	FHOD3;PCDHGB7;TENM3;PCDHGB6;TENM4;PCDHGB5;PCDHGB4;PCDHGB2;GRIK3;GRIK4;FGF1;SIPA1L2;PPP1R9A;PTPRG;AKAP12;RIMS1;GJA1;CDH4;SALL1;KCNT2;CRTAC1;PRX;ERC2;CFAP43;SPTAN1;SH3GL2;PKNOX2;SOX5;CHST8;EPHA4;GUCY1A2;PCDHGA7;PLEKHG1;PCDHGA5;VWF;PCDHGA4;PCDHGA3;PCDHGA2;EBF1;ANK2;LIFR;IL17RD;SRCIN1;SYN1;PCDHGA9;PCDHGB1;ROR2;TLN2;MAPT;RAPGEF5;CUEDC1;KANK4;TTYH2;IGSF3;PALM2;TSHZ2;PRTG;STOX2;CTIF;CECR2;ARVCF;EPB41L1;…
VENTRICLE	94/2316	0.00425755	0.0418014	0	0	1.30296	7.11294	DGKG;FHOD3;PCDHGB7;SPARC;PCDHGB5;PCDHGB4;HSPB8;PCDHGB2;PRKAG2;PTPRK;SHB;FGF1;SIPA1L2;ARHGAP35;PTPRG;NDST1;GJA1;SH3PXD2A;RPS6KA2;MYO18A;FAM53B;LARGE1;TNS1;GUCY1A2;PCDHGA7;PCDHGA5;VWF;PCDHGA4;PCDHGA3;TESC;PCDHGA2;EBF1;GAB1;ANK2;LIFR;ANK3;SYN1;PCDHGA9;NCOR2;TANC1;PALLD;SLCO2A1;RAPGEF1;PCDHGB1;ALPK3;ULK1;TLN2;RAPGEF5;SLC25A12;CUEDC1;AHNAK;TTYH2;IGSF3;NOD1;ACACB;COX5A;AKAP2;TTN;STOX2;CTIF;ABLIM1;ARVCF…
MIDBRAIN	92/2316	0.00834159	0.0750743	0	0	1.27524	6.10393	GSK3B;PGAP1;HSP90AB1;SPARC;TENM3;HIP1;TENM4;CELF1;UBXN2A;DENND5B;WWC1;GRIK3;GRIK4;MSI2;ARHGAP5;CELSR1;PPP1R9A;NUDT3;IGF1R;RIMS2;SALL1;ZMIZ1;SALL4;CHEK1;EPC1;ERC2;PKNOX2;KIRREL3;GUCY1A2;HSP90AA1;PCDHGA6;TSC22D1;DNMT3A;EBF1;ANK2;NAV1;ANK3;IL17RD;SRCIN1;MID1;PIAS2;RNF168;ENAH;EEF1A1;MAPT;DDC;CTBP2;TSHZ2;PDGFA;BAZ2B;RTN4;HSPD1;PRTG;ABR;STOX2;CECR2;ATXN2;DPP6;EPB41L1;FUT9;ZMAT4;MXI1;IGF2BP1;APBB2;NCAM…
FETAL LUNG	91/2316	0.0114703	0.0952917	0	0	1.26138	5.63582	FHOD3;PCDHGB7;SPARC;TENM3;PCDHGB6;MAML2;BNC2;PCDHGB5;PCDHGB4;HSPB8;PCDHGB2;GRIK4;PTPRK;SHB;SIPA1L2;PTPRG;NDST1;SEPT9;GJA1;CDH4;HHAT;SALL1;KCNT2;SH3PXD2A;TRPS1;RPS6KA2;PRX;ANXA6;PIEZO1;PKNOX2;SOX5;PCDHGA7;PCDHGA5;PCDHGA4;PCDHGA3;PCDHGA2;DENND2A;PCDHGA1;EBF1;SHROOM3;LIFR;MID1;ETV5;PCDHGA9;TANC1;PALLD;PCDHGB1;ROR2;TRIM16;TLN2;BCAT1;CUEDC1;TNFRSF21;PTGES;RAI14;CEMIP;AHNAK;PALM2;GLIS3;AKAP2;FAM129B;PR…
THYROID (BULK TISSUE)	91/2316	0.0114703	0.0884852	0	0	1.26138	5.63582	FHOD3;AHCYL2;PCDHGB7;SPARC;TENM3;TENM4;PCDHGB5;PCDHGB4;WWC1;HSPB8;PCDHGB2;LAMC2;PTPRK;SHB;FGF1;SIPA1L2;PTPRG;EPS8;NDST1;SPRED2;GJA1;HHAT;DEPTOR;SALL1;CRTAC1;RPS6KA2;PRX;PIEZO1;FAM53B;CFAP43;PKNOX2;TNS1;GUCY1A2;PCDHGA7;VWF;PCDHGA4;PCDHGA3;PCDHGA2;LIFR;ACTN4;ETV5;PCDHGA9;TANC1;PALLD;SLCO2A1;PCDHGB1;PKP4;ROR2;TLN2;RAPGEF5;SGK1;CUEDC1;CEMIP;SGMS1;AHNAK;IGSF3;GLIS3;ITPR1;NOD1;FAM129B;PRTG;ARVCF;EPB41L…
MYOBLAST	90/2316	0.0155862	0.112221	0	0	1.24752	5.19137	TCERG1;SPARC;TENM3;BNC2;PTPRK;RBPJ;FGF1;PTPRG;EPS8;AKAP12;TMEM267;NHSL1;RPS6KA2;REV3L;TNS3;PKNOX2;TNS1;TLE4;TGIF1;PCDHGA8;DENND2C;PCDHGA6;CSNK2A1;ANKRD45;NSMCE2;PCDHGA1;SLC39A11;TIMM23;ELOVL6;AP3B1;NAV1;LARP4B;COMMD1;ETV5;ADAM19;ENAH;ADRB3;TBL1XR1;PALLD;AGPS;TRIM16;TLN2;BCAT1;RAI14;MACF1;CEMIP;ANAPC15;AHNAK;LUZP1;UHRF1;PDGFA;IQGAP1;AKAP2;RTN4;TTN;STRN3;EXOSC5;ELMSAN1;PDGFC;IGF2BP1;SMYD1;APBB2;NCA…
SENSORY NEURON	90/2316	0.0155862	0.105207	0	0	1.24752	5.19137	TRIM71;FHOD3;GSK3B;AHCYL2;PCDHGB7;TENM3;PCDHGB6;MAML2;TENM4;PCDHGB4;HSPB8;GRIK3;GRIK4;FGF1;PPP1R9A;BICD1;ARHGAP35;AKAP12;RIMS1;SPRED2;CDH4;HHAT;GLT1D1;SALL1;KCNT2;CRTAC1;RPS6KA2;ERC2;LARGE1;SH3GL2;YWHAG;PKNOX2;SOX5;CHST8;GUCY1A2;PCDHGA7;PLEKHG1;PCDHGA4;PCDHGA3;PCDHGA2;PCDHGA1;EBF1;ANK2;LIFR;NAV1;ANK3;TEX2;IL17RD;SRCIN1;CDYL2;SYN1;ETV5;TANC1;PCDHGB1;TLN2;MAPT;TNFRSF21;RAI14;GRAMD1B;IGSF3;PALM2;GLI…
ATRIUM	85/2316	0.0604024	0.383733	0	0	1.17821	3.30691	FHOD3;PCDHGB7;SPARC;BNC2;PCDHGB5;PCDHGB4;HSPB8;PCDHGB2;PRKAG2;SHB;FGF1;SIPA1L2;ARHGAP35;PTPRG;EPS8;NDST1;GJA1;KCNT2;SH3PXD2A;RPS6KA2;PRX;FAM53B;LARGE1;PKNOX2;TNS1;EPHA4;GUCY1A2;PCDHGA7;VWF;PCDHGA4;PCDHGA3;PCDHGA2;GAB1;ANK2;LIFR;ANK3;MID1;SYN1;PCDHGA9;TANC1;PALLD;SLCO2A1;PCDHGB1;ROR2;TLN2;RAPGEF5;SLC25A12;CUEDC1;CEMIP;AHNAK;TTYH2;IGSF3;PALM2;AKAP2;FAM129B;TTN;CTIF;ARVCF;TSPAN9;SH3BP4;SMYD1;UBTD1;C…
CINGULATE GYRUS	85/2316	0.0604024	0.362414	0	0	1.17821	3.30691	DGKG;FHOD3;AHCYL2;PCDHGB7;PGAP1;TENM3;PCDHGB5;HSPB8;PCDHGB2;GRIK3;GRIK4;PTPRK;FGF1;PPP1R9A;BICD1;PTPRG;RIMS2;AKAP12;RIMS1;GJA1;SALL1;KCNT2;CRTAC1;ERC2;SPTAN1;SH3GL2;YWHAG;PKNOX2;SOX5;NSF;EPHA4;GUCY1A2;PCDHGA7;VWF;PCDHGA4;PCDHGA3;PCDHGA2;ACSL6;ANK2;LIFR;ANK3;SRCIN1;CDYL2;SYN1;PCDHGA9;ADRB3;KIT;PCDHGB1;TLN2;MAPT;RAPGEF5;PAFAH1B1;CEMIP;PALM2;ITPR1;LYZL4;STOX2;CTIF;ARVCF;DPP6;EPB41L1;FUT9;MGAT5B;ZMAT…
CARDIAC MUSCLE FIBER	84/2316	0.0764249	0.434415	0	0	1.16435	2.99406	TRIM71;FHOD3;PCDHGB7;TENM3;PCDHGB6;TENM4;DENND5B;PCDHGB4;HSPB8;PTPRK;SHB;FGF1;SIPA1L2;NDST1;GJA1;HHAT;SH3PXD2A;RPS6KA2;PRX;MYO18A;ANXA6;XXYLT1;ERC2;TNS1;KDM6A;EPHA4;GUCY1A2;GAB1;SHROOM3;ANK2;LIFR;NAV1;MID1;ADAM19;TANC1;PALLD;SLCO2A1;ALPK3;ROR2;TLN2;SLC25A12;CUEDC1;KANK4;RAI14;IGSF3;PALM2;LYZL4;AKAP2;FAM129B;TTN;PRTG;STOX2;CTIF;ABLIM1;ARVCF;EPB41L1;TSPAN9;ZMAT4;PRDM16;IGF2BP1;SH3BP4;SMYD1;NCAM1;IG…
OSTEOBLAST	84/2316	0.0764249	0.412694	0	0	1.16435	2.99406	FHOD3;PCDHGB7;SPARC;TENM3;BNC2;PCDHGB5;PCDHGB4;HSPB8;PCDHGB2;LAMC2;PTPRK;SHB;FGF1;PTPRG;EPS8;AKAP12;NDST1;RIMS1;SPRED2;GJA1;HHAT;DEPTOR;YY2;KCNT2;SH3PXD2A;RPS6KA2;PRX;PIEZO1;XXYLT1;PKNOX2;DLGAP4;TNS1;PCDHGA7;KLF12;PCDHGA4;PCDHGA3;PCDHGA2;EBF1;NAV1;MID1;CDYL2;ETV5;PCDHGA9;ENAH;TANC1;PALLD;PCDHGB1;MYH9;ROR2;TLN2;CUEDC1;PTGES;RAI14;CEMIP;AHNAK;PALM2;GLIS3;AKAP2;FAM129B;CTIF;ARVCF;TSPAN9;PDGFC;SH3BP4…
RENAL CORTEX	84/2316	0.0764249	0.393042	0	0	1.16435	2.99406	TRIM71;FHOD3;ALDH1L1;PCDHGB7;SPARC;TENM3;MAML2;TENM4;PCDHGB5;PCDHGB4;WWC1;PCDHGB2;GRIK3;PTPRK;SHB;FGF1;PPP1R9A;CDC14A;PTPRG;AKAP12;HHAT;DEPTOR;SALL1;KCNT2;CRTAC1;PRX;CFAP43;TNS3;PKNOX2;TNS1;EPHA4;PCDHGA7;KLF12;PLEKHG1;PCDHGA4;PCDHGA3;PCDHGA2;SHROOM3;LIFR;IL17RD;PCDHGA9;TANC1;PALLD;SLCO2A1;PCDHGB1;PKP4;ROR2;TLN2;RAPGEF5;KANK4;RAI14;DDC;AHNAK;IGSF3;GLIS3;PRTG;STOX2;CECR2;DPP6;EPB41L1;TSPAN9;PDGFC;P…
MOTOR NEURON	83/2316	0.0955615	0.46912	0	0	1.15049	2.70132	TRIM71;FHOD3;PCDHGB7;PGAP1;TENM3;PCDHGB6;TENM4;PCDHGB4;PCDHGB2;GRIK3;GRIK4;SIPA1L2;BICD1;PTPRG;AKAP12;RIMS1;GJA1;CDH4;SALL1;KCNT2;CRTAC1;ERC2;CFAP43;SPTAN1;SH3GL2;PKNOX2;SOX5;CHST8;GUCY1A2;PLEKHG1;NCOA3;DENND2A;EBF1;ANK2;LIFR;ANK3;IL17RD;SRCIN1;MID1;SYN1;PCDHGB1;TLN2;MAPT;RAPGEF5;KANK4;RAI14;DDC;IGSF3;TSHZ2;GLIS3;PRTG;STOX2;CTIF;CECR2;ARVCF;EPB41L1;TSPAN9;FUT9;MGAT5B;ZMAT4;IGF2BP1;SH3BP4;NCAM1;SR…
AMNIOTIC FLUID	80/2316	0.174138	0.817693	0	0	1.1089	1.93826	TRIM71;AHCYL2;MAML2;WWC1;HSPB8;LAMC2;SHB;PPP1R9A;SIPA1L3;ARHGAP35;EPS8;RIMS1;SPRED2;EPB41L4A;NHSL1;SH3PXD2A;TRPS1;RPS6KA2;PRX;KPNA7;EPC2;CFAP43;TNS1;SOX5;KDM6A;DENND2C;PLEKHG1;SPATS1;TET2;GAB1;SHROOM3;CDYL;MID1;ETV5;CD2AP;NCOR2;TANC1;SLCO2A1;PKP4;ROR2;TRIM16;RAPGEF5;KANK4;TNFRSF21;PTGES;RAI14;IGSF3;SRC;GLIS3;FAM129B;PRTG;STOX2;CTIF;ABLIM1;EPB41L1;PRDM16;SH3BP4;PIP5K1B;RHPN2;RREB1;ZBTB7C;AUTS2;SMU…
ENDOMETRIUM (BULK)	80/2316	0.174138	0.783622	0	0	1.1089	1.93826	FHOD3;PCDHGB7;SPARC;TENM3;PCDHGB6;MAML2;BNC2;TENM4;PCDHGB5;PCDHGB4;HSPB8;PCDHGB2;PTPRK;BICD1;PTPRG;EPS8;AKAP12;GJA1;HHAT;DEPTOR;YY2;SALL1;SH3PXD2A;TRPS1;REV3L;CFAP43;TNS1;SOX5;GUCY1A2;PCDHGA7;KLF12;PLEKHG1;PCDHGA5;KSR1;PCDHGA4;PCDHGA3;PCDHGA2;EBF1;SHROOM3;LIFR;MID1;CDYL2;PCDHGA9;TANC1;PALLD;PCDHGB1;ROR2;TLN2;TNFRSF21;RAI14;MACF1;CEMIP;AHNAK;GLIS3;DDX60;PRTG;TSPAN9;PDGFC;SH3BP4;PIP5K1B;APBB2;MAP4K…
GRANULOSA CELL	80/2316	0.174138	0.752277	0	0	1.1089	1.93826	FHOD3;PCDHGB7;SPARC;TENM3;MAML2;BNC2;PCDHGB5;PCDHGB2;GRIK3;PTPRK;SIPA1L2;PTPRG;IGF1R;EPS8;GJA1;HHAT;DEPTOR;YY2;KCNT2;CRTAC1;PRX;FBRSL1;FAM53B;TNS1;GUCY1A2;PLEKHG1;KSR1;VWF;PCDHGA4;PCDHGA2;LIFR;IRAK3;CDYL2;SYN1;ENAH;TANC1;SLCO2A1;PCDHGB1;B3GNT2;BCAT1;SGK1;PTGES;GRAMD1B;SGMS1;SRC;TSHZ2;ITPR1;FAM129B;CTIF;ZDHHC19;PDGFC;SCAP;TBL1X;ACSS1;CTNNAL1;ZBTB7C;EGR1;SMAD3;GALNT2;FN1;DAB2IP;ATP2B4;FAM189A1;GDF3…
FETAL BRAIN	78/2316	0.245235	1	0	0	1.08118	1.51964	FHOD3;PCDHGB7;HIP1;PCDHGB6;TENM4;PCDHGB5;PCDHGB4;WWC1;PCDHGB2;GRIK3;GRIK4;SHB;SIPA1L2;BICD1;PTPRG;RIMS1;SPRED2;GJA1;CDH4;SALL1;KCNT2;FAM53B;CFAP43;SH3GL2;SOX5;PCDHGA7;PLEKHG1;PCDHGA5;PCDHGA4;PCDHGA3;NCOA3;PCDHGA2;GAB1;SHROOM3;ANK2;LIFR;IL17RD;SRCIN1;SYN1;ETV5;TRAIP;PCDHGA9;RAB31;PCDHGB1;TLN2;MAPT;CUEDC1;MCM2;IGSF3;UHRF1;GLIS3;STOX2;CECR2;ARVCF;FUT9;MGAT5B;ZMAT4;PRDM16;SH3BP4;TSPAN5;NCAM1;JAM2;ASI…
NEURONAL PROGENITOR CELLS	78/2316	0.245235	0.98094	0	0	1.08118	1.51964	TRIM71;FHOD3;PGAP1;HSP90AB1;TENM3;PCDHGB6;TENM4;ZMYND8;ENO1;PPP1R9A;PTPRG;IGF1R;AKAP12;RIMS1;GJA1;NHSL1;SALL1;KCNT2;SALL4;CHEK1;TLK1;ERC2;PKNOX2;ARL6IP6;SOX5;TLE4;PCDHGA8;EPHA4;PCDHGA6;PCDHGA5;ANKRD45;DNMT3A;DENND2A;PCDHGA1;PAWR;SHROOM3;ELOVL6;ANK2;IL17RD;SRCIN1;MID1;YWHAZ;TRAIP;ENAH;EEF1A1;TIAM1;TBL1XR1;ROR2;BCAT1;CDCA3;UHRF1;TSHZ2;STRN3;PRTG;STOX2;CECR2;HMGXB4;PHKG1;FUT9;IGF2BP1;IGF2BP2;CTNNAL1…
PODOCYTE	78/2316	0.245235	0.945906	0	0	1.08118	1.51964	FHOD3;PCDHGB7;SPARC;TENM3;TENM4;PCDHGB5;PCDHGB4;WWC1;HSPB8;PCDHGB2;GRIK4;PTPRJ;LAMC2;PTPRK;SHB;FGF1;SIPA1L2;SIPA1L3;AKAP12;NDST1;GJA1;CDH4;HHAT;YY2;SALL1;CRTAC1;PIEZO1;TNS1;PCDHGA7;PCDHGA4;PCDHGA3;PCDHGA2;SHROOM3;ACTN4;MID1;PCDHGA9;TANC1;PALLD;SLCO2A1;PCDHGB1;MYH9;TRIM16;TLN2;CUEDC1;TNFRSF21;RAI14;AHNAK;IGSF3;SRC;GLIS3;AKAP2;FAM129B;RELB;PRTG;CTIF;ARVCF;TSPAN9;PDGFC;IGF2BP1;SH3BP4;UBTD1;RHPN2;MOR…
BRAIN (BULK)	77/2316	0.286138	1	0	0	1.06732	1.33552	DGKG;FHOD3;ALDH1L1;PCDHGB7;HSPB8;PCDHGB2;GRIK3;GRIK4;FGF1;RIMS1;GJA1;CDH4;GLT1D1;SALL1;CRTAC1;ERC2;SH3GL2;PKNOX2;CHST8;KIRREL3;NSF;EPHA4;GUCY1A2;VWF;PCDHGA4;PCDHGA3;PCDHGA2;ACSL6;ANK2;LIFR;SRCIN1;CDYL2;SYN1;PCDHGA9;TIAM1;PCDHGB1;PKP4;TLN2;MAPT;RAPGEF5;GRAMD1B;TTYH2;PALM2;ITPR1;LYZL4;STOX2;CTIF;ARVCF;DPP6;EPB41L1;TSPAN9;FUT9;GNG7;MGAT5B;ZMAT4;PIP5K1B;NCAM1;TRPM3;ZBTB7C;ASIC1;RAP1GAP2;NTRK2;IQSEC1;…
BREAST (BULK TISSUE)	77/2316	0.286138	1	0	0	1.06732	1.33552	FHOD3;ALDH1L1;PCDHGB7;MAML2;PCDHGB5;WWC1;HSPB8;PCDHGB2;GRIK3;LAMC2;SHB;FGF1;SIPA1L3;NDST1;SPRED2;CRTAC1;TRPS1;PRX;FBRSL1;PIEZO1;FAM53B;TNS1;PCDHGA7;PLEKHG1;VWF;PCDHGA4;PCDHGA3;PCDHGA2;EBF1;SHROOM3;LIFR;ACTN4;IL17RD;SRCIN1;PCDHGA9;NCOR2;TANC1;SLCO2A1;PCDHGB1;ULK1;ROR2;TLN2;RAPGEF5;CUEDC1;KANK4;PTGES;PFKFB3;AHNAK;IGSF3;TSHZ2;NOD1;ACACB;FAM129B;CTIF;ARVCF;EPB41L1;TSPAN9;SH3BP4;SMYD1;UBTD1;ZBTB7C;WDT…
HEART (BULK TISSUE)	77/2316	0.286138	0.996866	0	0	1.06732	1.33552	DGKG;FHOD3;PCDHGB7;PCDHGB5;PCDHGB4;HSPB8;PCDHGB2;SHB;FGF1;SIPA1L2;PTPRG;GJA1;CRTAC1;RPS6KA2;LARGE1;TNS1;GUCY1A2;PCDHGA7;PLEKHG1;PCDHGA5;VWF;PCDHGA4;PCDHGA3;TESC;PCDHGA2;EBF1;GAB1;ANK2;LIFR;SYN1;PCDHGA9;TANC1;PALLD;SLCO2A1;PCDHGB1;ALPK3;ROR2;TLN2;RAPGEF5;SLC25A12;CUEDC1;KANK4;TTYH2;IGSF3;PALM2;NOD1;AKAP2;TTN;PRTG;STOX2;ABLIM1;ARVCF;TSPAN9;PRDM16;SMYD1;PIP5K1B;NCAM1;CCDC141;ZBTB7C;NTRK2;PCDHGC5;PCD…
CEREBRAL CORTEX	76/2316	0.33019	1	0	0	1.05346	1.16732	DGKG;FHOD3;TENM3;TENM4;WWC1;GRIK3;GRIK4;FGF1;SIPA1L2;PPP1R9A;BICD1;RIMS2;AKAP12;RIMS1;CDH4;GLT1D1;SALL1;KCNT2;CRTAC1;ERC2;CFAP43;SH3GL2;PKNOX2;SOX5;CHST8;KIRREL3;EPHA4;GUCY1A2;DNMT3A;PCDHGA1;ANK2;LIFR;ANK3;SRCIN1;CDYL2;SYN1;PCDHGA9;KATNAL2;TLN2;MAPT;RAPGEF5;CX3CR1;GRAMD1B;TTYH2;IGSF3;PALM2;ITPR1;BAZ2B;STOX2;CTIF;DPP6;EPB41L1;FUT9;MGAT5B;ZMAT4;PRDM16;NCAM1;SRGAP3;CNNM2;TRPM3;ASIC1;NTRK2;AUTS2;PCDH…
CHONDROCYTE	76/2316	0.33019	1	0	0	1.05346	1.16732	DGKG;PCDHGB7;SPARC;MAML2;BNC2;PCDHGB5;PCDHGB4;HSPB8;PCDHGB2;SHB;FGF1;SIPA1L2;PTPRG;EPS8;AKAP12;RIMS1;SPRED2;GJA1;HHAT;YY2;KCNT2;CRTAC1;TRPS1;RPS6KA2;KPNA7;CFAP43;PKNOX2;SOX5;PCDHGA7;PCDHGA4;PCDHGA3;PCDHGA2;EBF1;LIFR;PCDHGA9;ENAH;KATNAL2;PCDHGB1;ROR2;TLN2;BCAT1;PTGES;RAI14;CEMIP;AHNAK;PALM2;GLIS3;DDX60;AKAP2;FAM129B;IRAK2;ZMAT4;PDGFC;CTNNAL1;ZBTB7C;NTRK2;GALNT2;PCDHGC5;PCDHGC4;PCDHGC3;FN1;DSTN;MCC…
LUNG (BULK TISSUE)	76/2316	0.33019	1	0	0	1.05346	1.16732	AHCYL2;PCDHGB7;PCDHGB5;CD80;WWC1;HSPB8;PCDHGB2;LAMC2;SHB;PTPRG;EPS8;NDST1;SPRED2;GJA1;KCNT2;SH3PXD2A;CRTAC1;RPS6KA2;PRX;KPNA7;PIEZO1;CFAP43;TNS3;TNS1;GUCY1A2;PLEKHG1;VWF;PCDHGA4;PCDHGA3;SPATS1;PCDHGA2;SHROOM3;LIFR;ETV5;TANC1;PALLD;SLCO2A1;KIT;ROR2;RAPGEF5;SGK1;CUEDC1;KANK4;CX3CR1;PFKFB3;SGMS1;AHNAK;IGSF3;SRC;GLIS3;NOD1;DDX60;AKAP2;FAM129B;PRTG;ARVCF;EPB41L1;TSPAN9;PRDM16;SH3BP4;UBTD1;PIP5K1B;ZBTB…
ADRENAL GLAND	75/2316	0.376909	1	0	0	1.0396	1.01439	DGKG;FHOD3;PCDHGB7;SPARC;TENM3;PCDHGB5;PCDHGB4;PCDHGB2;PPP1R9A;PTPRG;IGF1R;RIMS2;NDST1;GJA1;CDH4;HHAT;DEPTOR;PRX;TNS1;GUCY1A2;PCDHGA7;VWF;PCDHGA4;PCDHGA3;TESC;PCDHGA2;ANK2;LIFR;ETV5;PCDHGA9;TANC1;SLCO2A1;PCDHGB1;ALPK3;ROR2;TLN2;RAPGEF5;SGK1;CUEDC1;GRAMD1B;DDC;SGMS1;TSHZ2;ITPR1;ACACB;FAM129B;TTN;PRTG;CTIF;ARVCF;ZDHHC19;EPB41L1;TSPAN9;PCED1B;SCAP;NCAM1;CCDC141;CTNNAL1;MAP4K3;ZBTB7C;ZSWIM3;SMURF1;GA…
SKIN (BULK TISSUE)	74/2316	0.42569	1	0	0	1.02573	0.876022	FHOD3;PCDHGB7;TENM4;PCDHGB5;PCDHGB4;WWC1;HSPB8;LAMC2;PTPRK;SHB;SIPA1L2;NDST1;GJA1;HHAT;PPP4R1;SH3PXD2A;TRPS1;KPNA7;EPHA4;DENND2C;PCDHGA7;PLEKHG1;VWF;PCDHGA2;CDYL;MID1;PCDHGA9;TANC1;TIAM1;PALLD;SLCO2A1;PCDHGB1;ROR2;TRIM16;TLN2;RAPGEF5;SGK1;KANK4;PTGES;CEMIP;SGMS1;AHNAK;IGSF3;DDX60;FAM129B;STOX2;ABLIM1;TSPAN9;SH3BP4;ZBTB7C;NTRK2;YES1;SMURF1;LIMK2;PCDHGC3;FN1;DAB2IP;MCC;ELL2;PTPN14;POU2F3;TBX3;PLEKH…
DORSAL STRIATUM	73/2316	0.47583	1	0	0	1.01187	0.751514	DGKG;PCDHGB7;TENM3;TENM4;PCDHGB5;HSPB8;PCDHGB2;GRIK3;GRIK4;FGF1;PPP1R9A;RIMS2;RIMS1;GJA1;CDH4;GLT1D1;KCNT2;CRTAC1;TRPS1;ERC2;CFAP43;SH3GL2;SOX5;KIRREL3;GUCY1A2;PCDHGA7;VWF;PCDHGA4;PCDHGA3;PCDHGA2;ACSL6;ANK2;LIFR;ANK3;SRCIN1;CDYL2;SYN1;PCDHGA9;PCDHGB1;TLN2;MAPT;RAPGEF5;CX3CR1;GRAMD1B;TTYH2;PALM2;ITPR1;STOX2;DPP6;EPB41L1;FUT9;GNG7;MGAT5B;ZMAT4;NCAM1;TRPM3;ASIC1;NTRK2;PCDHGC5;PCDHGC4;DAB2IP;FAM189A1…
OVARY (BULK TISSUE)	73/2316	0.47583	1	0	0	1.01187	0.751514	TRIM71;FHOD3;PCDHGB7;TENM3;BNC2;TENM4;PCDHGB5;PCDHGB4;PCDHGB2;SHB;SIPA1L2;PTPRG;IGF1R;AKAP12;HHAT;EPB41L4A;DEPTOR;YY2;SALL1;KCNT2;KPNA7;CFAP43;GUCY1A2;PCDHGA7;BRD1;PLEKHG1;VWF;PCDHGA4;PCDHGA3;PCDHGA2;TEX14;LIFR;IL17RD;CDYL2;ETV5;PCDHGA9;TANC1;ADRB3;SLCO2A1;KIT;PCDHGB1;PKP4;ALPK3;ROR2;TLN2;RAPGEF5;KANK4;IGSF3;GLIS3;PRTG;ZDHHC19;EPB41L1;TSPAN9;APBB2;MORC1;CTNNAL1;ZBTB7C;PCDHGC4;DAB2IP;VWA3B;SORBS1;…
STROMAL CELL	73/2316	0.47583	1	0	0	1.01187	0.751514	FHOD3;PCDHGB7;SPARC;TENM3;MAML2;BNC2;TENM4;PCDHGB5;PCDHGB4;HSPB8;PCDHGB2;PTPRK;FGF1;PTPRG;EPS8;NDST1;SPRED2;GJA1;CDH4;YY2;SH3PXD2A;RPS6KA2;PRX;PIEZO1;XXYLT1;TNS1;GUCY1A2;PCDHGA7;PCDHGA5;PCDHGA4;PCDHGA3;PCDHGA2;EBF1;TEX2;ETV5;PCDHGA9;TANC1;PALLD;PCDHGB1;ROR2;TLN2;CUEDC1;PTGES;RAI14;CEMIP;SRC;GLIS3;AKAP2;FAM129B;CTIF;TSPAN9;SH3BP4;UBTD1;APBB2;CTNNAL1;ASIC1;GALNT2;PCDHGC5;PCDHGC4;PCDHGC3;FN1;DAB2IP;…
RETINA	72/2316	0.526551	1	0	0	0.998012	0.640133	FHOD3;AHCYL2;PCDHGB7;TENM3;TENM4;PCDHGB5;PCDHGB4;WWC1;HSPB8;PCDHGB2;GRIK3;GRIK4;FGF1;PPP1R9A;PTPRG;EPS8;RIMS2;AKAP12;RIMS1;HHAT;CRTAC1;RPS6KA2;ERC2;CFAP43;SH3GL2;PKNOX2;SOX5;GUCY1A2;PCDHGA7;PCDHGA4;PCDHGA3;PCDHGA2;SHROOM3;ANK2;LIFR;PCDHGA9;TANC1;PCDHGB1;PKP4;ALPK3;ROR2;TLN2;RAPGEF5;CUEDC1;KANK4;RAI14;GRAMD1B;DDC;IGSF3;LYZL4;PRTG;TSPAN9;MGAT5B;ZMAT4;TRPM3;ZBTB7C;NTRK2;PCDHGC5;PCDHGC4;ESRRB;DAB2IP;…
FORESKIN FIBROBLAST	71/2316	0.57704	1	0	0	0.984151	0.54113	SPARC;PCDHGB6;MAML2;BNC2;PCDHGB4;PTPRK;PTPRG;EPS8;AKAP12;GJA1;SALL1;SH3PXD2A;TRPS1;REV3L;TNS3;TLE4;KIRREL3;PCDHGA8;PCDHGA6;PCDHGA5;ANKRD45;PCDHGA1;SHROOM3;MID1;ETV5;ADAM19;ENAH;TANC1;RAB31;ADRB3;TBL1XR1;PALLD;TRIM16;BCAT1;SGK1;PTGES;RAI14;CEMIP;AHNAK;PALM2;GLIS3;AKAP2;FAM129B;CTIF;PHKG1;PDGFC;IGF2BP1;TSPAN5;IGF2BP2;CTNNAL1;MPZL1;ANKRD28;EGR1;YES1;SMAD3;PCDHGC3;FN1;FBXO36;ATP2B4;DSTN;ELL2;PTPN14;P…
MELANOCYTE	71/2316	0.57704	1	0	0	0.984151	0.54113	FHOD3;PCDHGB7;TENM3;BNC2;PCDHGB5;PCDHGB4;PTPRJ;SHB;SIPA1L2;EPS8;AKAP12;NDST1;SEPT9;HHAT;UBL3;NHSL1;SH3PXD2A;RPS6KA2;ANXA6;PIEZO1;FAM53B;LARGE1;TNS3;PKNOX2;SOX5;BRD1;PCDHGA4;PDE4D;ANK2;CDYL;MID1;ETV5;PCDHGA9;TANC1;PRKD3;KIT;RAPGEF1;SGK1;CUEDC1;RAI14;AHNAK;TTYH2;IGSF3;PALM2;NOD1;FAM129B;ABR;STOX2;TSPAN9;MGAT5B;MXI1;SH3BP4;UBTD1;MORC1;GALNT2;PCDHGC5;PCDHGC4;PCDHGC3;FN1;DAB2IP;RAB27A;SORBS1;MCC;GATAD…
BETA CELL	70/2316	0.626485	1	0	0	0.97029	0.453737	PCDHGB7;TENM3;TENM4;PCDHGB5;PCDHGB4;WWC1;PCDHGB2;SHB;SIPA1L2;PPP1R9A;SIPA1L3;ARHGAP35;IGF1R;RIMS2;SPRED2;SH3PXD2A;ZMIZ1;FBRSL1;ERC2;CFAP43;SH3GL2;DLGAP4;TNS1;SOX5;CHST8;SRRM2;GUCY1A2;PCDHGA7;BRD1;PCDHGA5;KSR1;PCDHGA4;PCDHGA3;PCDHGA2;SHROOM3;NAV1;SRCIN1;CDYL2;SYN1;PCDHGA9;NCOR2;PCDHGB1;ALPK3;ULK1;ROR2;RAPGEF5;TNFRSF21;DDC;KMT2C;PALM2;TSHZ2;GLIS3;TULP2;STOX2;ARVCF;DPP6;EPB41L1;PRDM16;TRPM3;RAP1GAP2…
KUPFFER CELL	68/2316	0.719242	1	0	0	0.942567	0.31063	FHOD3;PCDHGB7;SPARC;BNC2;PCDHGB5;PCDHGB4;HSPB8;PCDHGB2;LAMC2;PTPRK;SHB;FGF1;EPS8;NDST1;SPRED2;GJA1;DEPTOR;YY2;KCNT2;SH3PXD2A;RPS6KA2;PIEZO1;XXYLT1;PKNOX2;TNS1;PCDHGA7;PCDHGA4;PCDHGA3;PCDHGA2;LIFR;ANK3;PCDHGA9;TANC1;PALLD;PCDHGB1;MYH9;ROR2;RAPGEF5;CUEDC1;RAI14;CEMIP;PALM2;GLIS3;AKAP2;FAM129B;CTIF;TSPAN9;SH3BP4;UBTD1;MPZL1;ASIC1;SMAD3;GALNT2;PCDHGC5;PCDHGC3;FN1;DAB2IP;ATP2B4;TBX3;ARHGAP23;EXT1;PCDH…
SKELETAL MUSCLE (BULK TISSUE)	68/2316	0.719242	1	0	0	0.942567	0.31063	FHOD3;ALDH1L1;AHCYL2;PCDHGB7;TENM3;PCDHGB5;PCDHGB4;HSPB8;PCDHGB2;FGF1;GLT1D1;DEPTOR;RPS6KA2;PRX;MYO18A;FAM53B;LARGE1;PKNOX2;TNS1;GUCY1A2;DENND2C;PCDHGA7;KSR1;VWF;PCDHGA4;TPM3;PCDHGA3;PCDHGA2;PDE4D;ANK2;LIFR;PCDHGA9;PALLD;RAPGEF1;PCDHGB1;ALPK3;TLN2;MAPT;RAPGEF5;SLC25A12;CUEDC1;CX3CR1;TTYH2;ACACB;TTN;CECR2;ARVCF;PHKG1;TSPAN9;CDC37L1;SMYD1;UBTD1;CCDC141;SMAD3;CRADD;PCDHGC5;PCDHGC4;ESRRB;DAB2IP;HS3ST…
TESTIS (BULK TISSUE)	68/2316	0.719242	1	0	0	0.942567	0.31063	TRIM71;FHOD3;ALDH1L1;PCDHGB7;SPARC;PCDHGB5;PCDHGB4;PCDHGB2;GRIK3;PTPRG;AKAP12;RIMS1;HHAT;FAM53B;CFAP43;TNS1;TLE4;EPHA4;PCDHGA7;BRD1;PLEKHG1;VWF;PCDHGA4;PCDHGA3;SPATS1;PCDHGA2;TEX14;LIFR;CDYL2;PCDHGA9;PCDHGB1;ROR2;TLN2;RAPGEF5;MACF1;TTYH2;TSACC;SRC;KMT2C;TSHZ2;TULP2;LYZL4;TTN;PRTG;ARVCF;ZDHHC19;SH3BP4;SCAP;UBTD1;PIP5K1B;ACSS1;CCDC141;MORC1;TRPM3;ZBTB7C;DAB2IP;FAM189A1;VWA3B;NMNAT2;PLEKHA7;ARHGAP23…
HAIR FOLLICLE	67/2316	0.761275	1	0	0	0.928706	0.253315	FHOD3;PCDHGB7;TENM3;BNC2;PCDHGB5;PCDHGB4;PCDHGB2;PTPRK;SHB;FGF1;PTPRG;NDST1;RIMS1;GJA1;HHAT;KCNT2;SH3PXD2A;TRPS1;RPS6KA2;PIEZO1;GUCY1A2;PCDHGA7;PCDHGA4;PCDHGA3;PCDHGA2;DENND2A;EBF1;ANK2;CDYL2;PCDHGA9;TANC1;PCDHGB1;ROR2;TLN2;CUEDC1;TNFRSF21;PTGES;CEMIP;AHNAK;PALM2;GLIS3;FAM129B;CTIF;TSPAN9;PDGFC;SH3BP4;UBTD1;CTNNAL1;TRPM3;PCDHGC5;PCDHGC4;PCDHGC3;FN1;DAB2IP;MCC;PTPN14;TBX3;ENOX1;ARHGAP23;EXT1;PCDHG…
OLIGODENDROCYTE	67/2316	0.761275	1	0	0	0.928706	0.253315	FHOD3;PCDHGB7;SPARC;TENM3;HIP1;PCDHGB6;MAML2;PCDHGB4;WWC1;HSPB8;PCDHGB2;GRIK3;GRIK4;SHB;FGF1;GJA1;CDH4;YY2;SALL1;KCNT2;RPS6KA2;CFAP43;SH3GL2;PKNOX2;SOX5;CHST8;PLEKHG1;PCDHGA4;DENND2A;SHROOM3;ENAH;TANC1;RAB31;PALLD;SLCO2A1;PCDHGB1;TLN2;CUEDC1;CEMIP;TTYH2;IGSF3;GLIS3;FAM129B;PRTG;ARVCF;TSPAN9;MGAT5B;PDGFC;IGF2BP1;SH3BP4;NCAM1;RHPN2;ASIC1;NTRK2;GALNT2;PCDHGC5;PCDHGC4;PCDHGC3;DAB2IP;FAM189A1;PLEKHA7;…
ESOPHAGUS (BULK TISSUE)	66/2316	0.799764	1	0	0	0.914845	0.204412	FHOD3;PCDHGB7;PCDHGB5;WWC1;HSPB8;LAMC2;SHB;SIPA1L2;NDST1;GJA1;PPP4R1;DEPTOR;SH3PXD2A;KPNA7;FAM53B;DENND2C;PLEKHG1;VWF;GAB1;SHROOM3;LIFR;MID1;PCDHGA9;TANC1;TIAM1;PALLD;SLCO2A1;PKP4;TRIM16;RAPGEF5;CUEDC1;TNFRSF21;PTGES;CEMIP;AHNAK;IGSF3;SRC;FAM129B;STOX2;ABLIM1;EPB41L1;TSPAN9;SH3BP4;ZBTB7C;NTRK2;SMAD3;SMURF1;LIMK2;DAB2IP;BTBD11;MCC;TBX3;PLEKHA7;ARHGAP23;PCDHGA11;MYO1E;DNMBP;STK24;PPP2R2C;ST5;FAT1;C…
INTESTINAL EPITHELIAL CELL	66/2316	0.799764	1	0	0	0.914845	0.204412	FHOD3;PCDHGB7;TENM3;PCDHGB5;PCDHGB4;HSPB8;PCDHGB2;PTPRK;SHB;FGF1;NDST1;SPRED2;HHAT;YY2;SALL1;SH3PXD2A;PRX;KPNA7;PIEZO1;TNS3;PCDHGA7;PCDHGA4;PCDHGA3;PCDHGA2;SHROOM3;ACTN4;CDYL2;PCDHGA9;ADAM19;TANC1;PALLD;SLCO2A1;PCDHGB1;MYH9;TRIM16;TLN2;CUEDC1;TNFRSF21;RAI14;CEMIP;GLIS3;TULP2;FAM129B;RELB;ARVCF;EPB41L1;TSPAN9;MGAT5B;PDGFC;SH3BP4;UBTD1;MPZL1;SMURF1;PCDHGC5;FN1;DAB2IP;HS3ST5;TBX3;ARHGAP23;EXT1;PCDHG…
PERICARDIUM	66/2316	0.799764	1	0	0	0.914845	0.204412	PCDHGB7;SPARC;TENM3;BNC2;PCDHGB5;PCDHGB4;HSPB8;PCDHGB2;SHB;PTPRG;EPS8;AKAP12;NDST1;GJA1;DEPTOR;KCNT2;SH3PXD2A;TRPS1;RPS6KA2;PRX;XXYLT1;PKNOX2;TNS1;GUCY1A2;PCDHGA7;PCDHGA4;PCDHGA3;PCDHGA2;EBF1;LIFR;PCDHGA9;SLCO2A1;PCDHGB1;ROR2;TLN2;CUEDC1;KANK4;TNFRSF21;RAI14;CEMIP;AHNAK;IGSF3;GLIS3;AKAP2;FAM129B;CTIF;TSPAN9;ZMAT4;SH3BP4;UBTD1;APBB2;ASIC1;PCDHGC5;PCDHGC3;FN1;FAM189A1;EEF2;TBX3;ENOX1;ARHGAP23;EXT1;…
ADIPOSE (BULK TISSUE)	65/2316	0.834401	1	0	0	0.900983	0.163115	ALDH1L1;PCDHGB7;SPARC;TENM3;PCDHGB5;HSPB8;PCDHGB2;FGF1;PTPRG;EPS8;AKAP12;NDST1;SPRED2;GJA1;RPS6KA2;PRX;ANXA6;PIEZO1;TNS1;GUCY1A2;PCDHGA7;PLEKHG1;VWF;PCDHGA4;PCDHGA3;PCDHGA2;EBF1;ANK2;LIFR;PCDHGA9;SLCO2A1;PECAM1;TLN2;RAPGEF5;CUEDC1;KANK4;TNFRSF21;PTGES;PFKFB3;AHNAK;TSHZ2;NOD1;ACACB;AKAP2;CTIF;EPB41L1;TSPAN9;PDGFC;UBTD1;APBB2;JAM2;ZBTB7C;NTRK2;PCDHGC3;DAB2IP;NMNAT2;SORBS1;TBX3;ARHGAP23;PCDHGA11;PCD…
RESPIRATORY SMOOTH MUSCLE	65/2316	0.834401	1	0	0	0.900983	0.163115	FHOD3;PCDHGB7;SPARC;BNC2;PCDHGB5;PCDHGB4;HSPB8;PCDHGB2;GRIK4;PTPRK;SHB;PTPRG;AKAP12;NDST1;GJA1;YY2;KCNT2;SH3PXD2A;RPS6KA2;PRX;TNS1;PCDHGA7;PCDHGA4;PCDHGA3;PCDHGA2;DENND2A;EBF1;MID1;PCDHGA9;PALLD;PCDHGB1;ROR2;TLN2;CUEDC1;PTGES;RAI14;CEMIP;SRC;GLIS3;TULP2;FAM129B;CTIF;EPB41L1;TSPAN9;PDGFC;SH3BP4;TSPAN5;UBTD1;ZSWIM3;ASIC1;SMAD3;GALNT2;PCDHGC5;PCDHGC3;FN1;DAB2IP;TBX3;ENOX1;ARHGAP23;EXT1;PCDHGA11;ADGR…
OMENTUM	64/2316	0.865031	1	0	0	0.887122	0.128624	ALDH1L1;PCDHGB7;SPARC;TENM3;BNC2;PCDHGB5;HSPB8;PCDHGB2;SHB;FGF1;PTPRG;EPS8;AKAP12;SPRED2;GJA1;DEPTOR;KCNT2;CRTAC1;TNS1;SOX5;GUCY1A2;PLEKHG1;VWF;PCDHGA4;PCDHGA3;PCDHGA2;EBF1;LIFR;PCDHGA9;SLCO2A1;PECAM1;PCDHGB1;ROR2;TLN2;RAPGEF5;SGK1;CUEDC1;KANK4;TNFRSF21;PFKFB3;AHNAK;TSHZ2;GLIS3;ACACB;FAM129B;RELB;CTIF;EPB41L1;TSPAN9;PDGFC;SH3BP4;UBTD1;ZBTB7C;NTRK2;EGR1;PCDHGC3;FN1;DAB2IP;SORBS1;TBX3;ARHGAP23;ADGR…
BASAL CELL	63/2316	0.891638	1	0	0	0.873261	0.100159	FHOD3;PCDHGB5;WWC1;LAMC2;PTPRK;SHB;CELSR1;NDST1;SPRED2;GJA1;CDH4;HHAT;PPP4R1;YY2;SH3PXD2A;PRX;KPNA7;CFAP43;DENND2C;PAWR;SHROOM3;CDYL;MID1;CD2AP;TANC1;PALLD;PKP4;TRIM16;CUEDC1;KANK4;TNFRSF21;RAI14;AHNAK;IGSF3;SRC;TULP2;TAF5L;FAM129B;PDGFC;SH3BP4;UBTD1;RHPN2;CTNNAL1;ZBTB7C;EGR1;YES1;SMAD3;SMURF1;LIMK2;DAB2IP;MCC;ELL2;PTPN14;ARHGAP23;EXT1;PCDHGA11;MYO1E;FMNL2;STK24;FAT1;LGR4;FGFR2;CCNJL
SMALL INTESTINE (BULK TISSUE)	63/2316	0.891638	1	0	0	0.873261	0.100159	TENM3;BNC2;HSPB8;GRIK3;LAMC2;PTPRK;SHB;SIPA1L2;PTPRG;EPS8;AKAP12;GJA1;DEPTOR;NHSL1;KCNT2;SH3PXD2A;TNS1;GUCY1A2;PLEKHG1;VWF;GAB1;SHROOM3;ANK2;LIFR;MID1;CDYL2;CD2AP;TANC1;PALLD;SLCO2A1;ROR2;TLN2;RAPGEF5;SGK1;GRAMD1B;DDC;AHNAK;IGSF3;SRC;TSHZ2;DDX60;FAM129B;TSPAN9;PRDM16;SH3BP4;SMYD1;PIP5K1B;RHPN2;YES1;FN1;DAB2IP;SORBS1;TBX3;PLEKHA7;TTC39B;EXT1;ICK;MYO1E;ADGRD1;DNMBP;FAT1;SLC28A1;LGR4
VASCULAR SMOOTH MUSCLE	63/2316	0.891638	1	0	0	0.873261	0.100159	FHOD3;PCDHGB7;SPARC;BNC2;PCDHGB5;PCDHGB4;HSPB8;PCDHGB2;LAMC2;SHB;FGF1;AKAP12;NDST1;SPRED2;GJA1;YY2;SH3PXD2A;RPS6KA2;PIEZO1;XXYLT1;TNS1;PCDHGA7;PCDHGA4;PCDHGA3;PCDHGA2;PCDHGA9;ADAM19;TANC1;PCDHGB1;TLN2;CUEDC1;KANK4;TNFRSF21;PTGES;RAI14;CEMIP;PALM2;GLIS3;AKAP2;FAM129B;RELB;CTIF;TSPAN9;PDGFC;SH3BP4;UBTD1;ASIC1;SMAD3;GALNT2;PCDHGC5;PCDHGC3;FN1;DAB2IP;NMNAT2;MCC;TBX3;ARHGAP23;EXT1;PCDHGA11;PCDHGA12;DN…
SUPERIOR FRONTAL GYRUS	62/2316	0.914338	1	0	0	0.859399	0.0769635	FHOD3;ALDH1L1;HSPB8;PCDHGB2;GRIK3;GRIK4;FGF1;RIMS1;GJA1;CDH4;GLT1D1;CRTAC1;ERC2;SH3GL2;PKNOX2;CHST8;KIRREL3;GUCY1A2;VWF;PCDHGA4;PCDHGA3;PCDHGA2;ACSL6;ANK2;SRCIN1;SYN1;PCDHGA9;PCDHGB1;TLN2;MAPT;RAPGEF5;GRAMD1B;TTYH2;LYZL4;ABR;STOX2;CTIF;ARVCF;DPP6;EPB41L1;FUT9;GNG7;MGAT5B;ZMAT4;PIP5K1B;NCAM1;ZBTB7C;ASIC1;RAP1GAP2;NTRK2;PCDHGC5;PCDHGC4;PCDHGC3;DAB2IP;FAM189A1;HS3ST5;NMNAT2;SORBS1;ARHGAP23;PCDHGA12;…
LIVER (BULK TISSUE)	61/2316	0.933354	1	0	0	0.845538	0.0583175	ALDH1L1;SPARC;SLC44A1;PTPRK;SHB;PTPRG;EPS8;AKAP12;NDST1;GJA1;NHSL1;SALL1;KPNA7;DLGAP4;TNS1;DENND2C;VWF;PAWR;LIFR;ETV5;TANC1;SLCO2A1;RAPGEF5;SGK1;KANK4;RAI14;DDC;GLIS3;TULP2;ACACB;AKAP2;CTIF;CECR2;TSPAN9;IRAK2;MXI1;CDC37L1;SH3BP4;SUSD6;RHPN2;CTNNAL1;ANKRD28;EGR1;TCF7L1;YES1;SMAD3;IDH1;FN1;SORBS1;MCC;ELL2;TBX3;EXT1;RCAN1;MYO1E;ADGRD1;FMNL2;SLC28A1;LGR4;ZCCHC2;FGFR2
PANCREATIC ISLET	61/2316	0.933354	1	0	0	0.845538	0.0583175	WWC1;LAMC2;ARHGAP5;PPP1R9A;SIPA1L3;NUDT3;IGF1R;RIMS2;EPB41L4A;REV3L;TLK1;SH3GL2;KIRREL3;STPG1;PCDHGA8;DENND2C;PCDHGA6;ACSL6;NAV1;CBFA2T2;ARID1B;PIAS2;TBL1XR1;PALLD;MAPT;TNFRSF21;DDC;PDGFA;BAZ2B;ACACB;RTN4;STRN3;GK5;ATXN2;ABLIM1;DPP6;PHKG1;SRGAP3;CNNM2;TRPM3;RAP1GAP2;EGR1;KCNJ6;WTAP;ST8SIA1;FBXO36;MOK;RAB27A;DSTN;NMNAT2;ELL2;PLXDC1;POU2F3;TTC39B;PCDHGA10;GSTA4;SYT11;CCPG1;MDM4;TACC2;BMPR1A
GASTRIC TISSUE (BULK)	60/2316	0.948991	1	0	0	0.831677	0.0435434	AHCYL2;PCDHGB7;BNC2;HSPB8;PCDHGB2;GRIK3;LAMC2;PTPRK;SHB;EPS8;SPRED2;DEPTOR;SH3PXD2A;KPNA7;TNS1;PLEKHG1;VWF;PCDHGA4;TESC;PCDHGA2;SHROOM3;LIFR;TANC1;PALLD;SLCO2A1;KIT;ROR2;TLN2;RAPGEF5;CUEDC1;KANK4;TNFRSF21;DDC;AHNAK;IGSF3;SRC;DDX60;FAM129B;EPB41L1;TSPAN9;FUT9;PRDM16;SH3BP4;SMYD1;PIP5K1B;RHPN2;ACSS1;ZBTB7C;RAP1GAP2;FN1;DAB2IP;SORBS1;TBX3;PLEKHA7;EXT1;DNMBP;ST5;FAT1;LGR4;FGFR2
HEPATIC STELLATE CELL	60/2316	0.948991	1	0	0	0.831677	0.0435434	FHOD3;PCDHGB7;PCDHGB5;PCDHGB4;HSPB8;PCDHGB2;LAMC2;SHB;FGF1;SIPA1L3;SPRED2;CDH4;YY2;SH3PXD2A;PRX;PIEZO1;XXYLT1;DLGAP4;PCDHGA7;PCDHGA4;PCDHGA3;NCOA3;PCDHGA2;ACTN4;CDYL2;ETV5;TRAIP;PCDHGA9;TFDP1;PCDHGB1;RAI14;CEMIP;AHNAK;LUZP1;SRC;PALM2;TAF5L;AKAP2;FAM129B;CTIF;TSPAN9;PDGFC;SH3BP4;UBTD1;E2F3;IGF2BP2;ZSWIM3;SMAD3;SMURF1;PCDHGC5;SETD1A;FN1;DAB2IP;ARHGAP23;EXT1;PCDHGA11;PCDHGA12;DNMBP;FAT1;CCNJL
MYOFIBROBLAST	60/2316	0.948991	1	0	0	0.831677	0.0435434	FHOD3;PCDHGB7;SPARC;PCDHGB5;HSPB8;PCDHGB2;PTPRK;SHB;FGF1;NDST1;SPRED2;GJA1;HHAT;YY2;SALL1;SH3PXD2A;RPS6KA2;PRX;ANXA6;PKNOX2;PCDHGA7;PCDHGA4;PCDHGA3;PCDHGA2;DENND2A;LIFR;ACTN4;TRAIP;PCDHGA9;ADAM19;PALLD;SLCO2A1;PCDHGB1;ROR2;TLN2;CUEDC1;TNFRSF21;PTGES;RAI14;CEMIP;GLIS3;FAM129B;CTIF;TSPAN9;PDGFC;SH3BP4;UBTD1;ASIC1;PCDHGC3;FN1;DAB2IP;HS3ST5;TBX3;ARHGAP23;EXT1;PCDHGA11;PCDHGA12;ST5;FAT1;CCNJL
KERATINOCYTE	59/2316	0.96161	1	0	0	0.817816	0.0320147	FHOD3;PCDHGB7;TENM3;PCDHGB5;PCDHGB4;WWC1;HSPB8;LAMC2;PTPRK;SHB;GJA1;CDH4;SH3PXD2A;KPNA7;PIEZO1;DENND2C;PAWR;SHROOM3;ACTN4;TANC1;TRIM16;RAPGEF5;KANK4;TNFRSF21;PTGES;AHNAK;IGSF3;SRC;DDX60;FAM129B;TSPAN9;SH3BP4;UBTD1;IGF2BP2;CTNNAL1;ZBTB7C;YES1;SMURF1;PCDHGC5;LIMK2;FN1;DAB2IP;MCC;ELL2;PTPN14;POU2F3;TBX3;ARHGAP23;EXT1;PCDHGA11;MYO1E;PCDHGA12;CDK7;PPP2R2C;MOB2;FAT1;XKR6;LGR4;FGFR2
WHARTONS JELLY	59/2316	0.96161	1	0	0	0.817816	0.0320147	FHOD3;PCDHGB7;SPARC;TENM3;BNC2;TENM4;PCDHGB5;PCDHGB4;HSPB8;PCDHGB2;LAMC2;PTPRK;SHB;FGF1;GJA1;HHAT;YY2;KCNT2;ANXA6;PCDHGA7;PCDHGA4;PCDHGA3;PCDHGA2;LIFR;CDYL2;ETV5;PCDHGA9;ADAM19;PCDHGB1;ROR2;TLN2;BCAT1;RAI14;CEMIP;AHNAK;PALM2;AKAP2;FAM129B;TSPAN9;MGAT5B;PDGFC;IGF2BP1;SH3BP4;UBTD1;APBB2;CTNNAL1;ZSWIM3;CDK17;PCDHGC5;FN1;BTBD11;TBX3;ARHGAP23;EXT1;PCDHGA11;MYO1E;PCDHGA12;DNMBP;FAT1
SUBCUTANEOUS ADIPOSE TISSUE	58/2316	0.971601	1	0	0	0.803954	0.0231622	ALDH1L1;PCDHGB7;SPARC;TENM3;TENM4;PCDHGB5;HSPB8;FGF1;EPS8;NDST1;RPS6KA2;PRX;ANXA6;PIEZO1;TNS1;GUCY1A2;PLEKHG1;VWF;PCDHGA4;PCDHGA3;PCDHGA2;EBF1;LIFR;PCDHGA9;SLCO2A1;PECAM1;TLN2;RAPGEF5;CUEDC1;KANK4;TNFRSF21;PTGES;PFKFB3;AHNAK;TSHZ2;NOD1;ACACB;AKAP2;CTIF;EPB41L1;TSPAN9;UBTD1;APBB2;JAM2;ZBTB7C;NTRK2;TCF7L1;PCDHGC3;DAB2IP;NMNAT2;SORBS1;TBX3;ARHGAP23;PCDHGA12;TNIP1;MOB2;FAT1;LGR4
SKELETAL MUSCLE SATELLITE CELL	57/2316	0.979359	1	0	0	0.790093	0.0164788	FHOD3;PCDHGB7;TENM3;BNC2;PCDHGB5;PCDHGB4;HSPB8;PCDHGB2;LAMC2;SHB;PTPRG;EPS8;AKAP12;GJA1;TRPS1;RPS6KA2;PIEZO1;GUCY1A2;PCDHGA7;PCDHGA4;PCDHGA3;PCDHGA2;EBF1;ANK2;LIFR;PCDHGA9;PCDHGB1;TLN2;BCAT1;PTGES;RAI14;AHNAK;GLIS3;AKAP2;FAM129B;TTN;PRTG;PDGFC;SH3BP4;SMYD1;UBTD1;CTNNAL1;TRPM3;PCDHGC5;PCDHGC4;FN1;ATP2B4;EEF2;PTPN14;TBX3;ENOX1;EXT1;PCDHGA11;MYO1E;PCDHGA12;DNMBP;FAT1
PREADIPOCYTE	55/2316	0.989676	1	0	0	0.762371	0.00791143	PCDHGB7;TENM3;BNC2;PCDHGB5;PCDHGB4;PCDHGB2;SHB;PTPRG;EPS8;AKAP12;TRPS1;RPS6KA2;PIEZO1;EPHA4;GUCY1A2;PCDHGA7;PCDHGA4;PCDHGA3;PCDHGA2;EBF1;ANK2;LIFR;IRAK3;ETV5;PCDHGA9;PCDHGB1;ROR2;TLN2;PTGES;RAI14;AHNAK;PALM2;GLIS3;AKAP2;FAM129B;PRTG;SH3BP4;UBTD1;TRPM3;PCDHGC5;PCDHGC4;PCDHGC3;FN1;ATP2B4;MCC;TBX3;ENOX1;EXT1;PCDHGA11;MYO1E;PCDHGA12;DNMBP;FMNL2;FAT1;PGPEP1L
VALVE	55/2316	0.989676	1	0	0	0.762371	0.00791143	PCDHGB7;SPARC;PCDHGB5;HSPB8;PCDHGB2;GRIK3;SHB;FGF1;DEPTOR;KCNT2;CRTAC1;PRX;KPNA7;PKNOX2;TNS1;PCDHGA7;PCDHGA5;VWF;PCDHGA4;PCDHGA3;PCDHGA2;EBF1;PCDHGA9;SLCO2A1;PCDHGB1;ROR2;CUEDC1;CX3CR1;CEMIP;TTYH2;IGSF3;TSHZ2;GLIS3;FAM129B;CTIF;ARVCF;TSPAN9;PRDM16;UBTD1;ZBTB7C;NTRK2;PCDHGC5;PCDHGC4;PCDHGC3;FN1;DAB2IP;FAM189A1;SORBS1;PLXDC1;ARHGAP23;EXT1;PCDHGA11;ADGRD1;PCDHGA12;SLC28A1
GASTRIC EPITHELIAL CELL	54/2316	0.992901	1	0	0	0.748509	0.00533237	AHCYL2;PCDHGB5;WWC1;HSPB8;LAMC2;PTPRK;SHB;EPS8;HHAT;KPNA7;CFAP43;KDM6A;PLEKHG1;TESC;SHROOM3;LIFR;CD2AP;TANC1;MYH9;ALPK3;ROR2;TRIM16;CUEDC1;TNFRSF21;IGSF3;SRC;GLIS3;DDX60;FAM129B;RELB;ARVCF;EPB41L1;IRAK2;PRDM16;SH3BP4;PIP5K1B;RHPN2;ZBTB7C;RAP1GAP2;SMAD3;SMURF1;LIMK2;DAB2IP;HS3ST5;VWA3B;POU2F3;PLEKHA7;EXT1;MYO1E;DNMBP;TNIP1;FAT1;XKR6;LGR4
MAMMARY GLAND	54/2316	0.992901	1	0	0	0.748509	0.00533237	PCDHGB5;WWC1;HSPB8;PCDHGB2;GRIK3;MSI2;PTPRK;SHB;HHAT;DEPTOR;YY2;TRPS1;PRX;KPNA7;PIEZO1;CHST8;BCAS3;PCDHGA7;PCDHGA4;NCOA3;PCDHGA2;SHROOM3;TEX14;CDYL2;PCDHGA9;TANC1;PCDHGB1;ULK1;ROR2;CUEDC1;IGSF3;FAM129B;PRTG;ARVCF;TSPAN9;FUT9;MGAT5B;UBTD1;APBB2;RHPN2;ZBTB7C;ZSWIM3;ASIC1;PAK4;SETD1A;HIPK1;EEF2;POU2F3;TBX3;PLEKHA7;MED13L;DNMBP;PPP2R2C;FAT1
OOCYTE	52/2316	0.996833	1	0	0	0.720787	0.00228609	TRIM71;FHOD3;GRIK4;HHAT;GLT1D1;YY2;CRTAC1;CHEK1;KPNA7;JARID2;ERC2;SH3GL2;GUCY1A2;MAP2K1;PLEKHG1;TESC;EBF1;GAB1;TEX14;IL17RD;TRAIP;TIAM1;SLCO2A1;KIT;B3GNT2;TLN2;TTYH2;UHRF1;PALM2;NOD1;TAF5L;PRTG;CECR2;MGAT5B;RHPN2;CNNM2;CCDC141;ZBTB7C;ZSWIM3;NTRK2;ESRRB;DAB2IP;VWA3B;TBX3;PLEKHA7;ENOX1;ADGRD1;CDK7;PPP2R2C;CCDC6;PGPEP1L;ZCCHC2
ALPHA CELL	48/2316	0.999504	1	0	0	0.665342	0.000330134	PCDHGB7;DDC;TENM3;TENM4;PCDHGB5;WWC1;PALM2;PCDHGB2;GLIS3;TULP2;SHB;PPP1R9A;SIPA1L3;RIMS2;SPRED2;ARVCF;DPP6;KCNT2;SH3PXD2A;EPB41L1;ERC2;CFAP43;SH3GL2;SOX5;RAP1GAP2;EGR1;PCDHGA7;KCNJ6;PCDHGA5;PCDHGA4;PCDHGA3;PCDHGC5;PCDHGA2;PCDHGC4;FAM189A1;BTBD11;ANK2;NAV1;NMNAT2;ELL2;SRCIN1;SYN1;PCDHGA9;PCDHGB1;ALPK3;SLC28A1;PGPEP1L;TNFRSF21
PLASMACYTOID DENDRITIC CELL	48/2316	0.999504	1	0	0	0.665342	0.000330134	CX3CR1;GRAMD1B;MAML2;TTYH2;IGSF3;PCDHGB5;SRC;CD80;PCDHGB2;ITPR1;TULP2;NOD1;PTPRJ;DDX60;TAF5L;CDC14A;RELB;SPRED2;TMEM267;HHAT;GLT1D1;YY2;PRX;PCED1B;SH3BP4;FAM53B;PIP5K1B;MORC1;ZSWIM3;SETD1A;TEX14;VWA3B;CDYL;TMEM131;CD2AP;ADAM19;EXT1;PCDHGA11;MYO1E;PCDHGA12;SP2;TNIP1;RAPGEF1;ARHGEF3;B3GNT2;CUEDC1;TNFRSF21;ZCCHC2
ALVEOLAR CELL TYPE II	47/2316	0.999703	1	0	0	0.65148	0.000193694	TRIM71;AHCYL2;SGMS1;IGSF3;WWC1;HSPB8;GLIS3;GRIK4;LAMC2;PTPRK;SHB;PPP1R9A;FAM129B;FGF4;PRTG;EPS8;RIMS1;GJA1;EPB41L4A;CRTAC1;IRAK2;PRDM16;KPNA7;PIP5K1B;CCDC141;MORC1;CFAP43;CTNNAL1;PKNOX2;ZBTB7C;DENND2C;KCNJ6;YES1;SMURF1;PAWR;SHROOM3;LIFR;VWA3B;POU2F3;CD2AP;ADGRD1;FMNL2;NCOA7;TRIM16;RAPGEF5;TNFRSF21;FGFR2
DENTATE GRANULE CELL	46/2316	0.999825	1	0	0	0.637619	0.00011174	DGKG;FHOD3;HSPB8;PALM2;TSHZ2;GRIK4;FGF1;PPP1R9A;LYZL4;STOX2;RIMS1;GLT1D1;DPP6;ZDHHC19;KCNT2;EPB41L1;FUT9;ZMAT4;PIP5K1B;ERC2;MORC1;CFAP43;TRPM3;SH3GL2;ASIC1;NSF;NTRK2;EPHA4;GUCY1A2;KCNJ6;PCDHGA4;PCDHGA3;PCDHGC5;PCDHGA2;ANKRD45;ACSL6;FAM189A1;ANK2;NMNAT2;ANK3;SYN1;PCDHGA9;TIAM1;PPP2R2C;RAPGEF5;XKR6
HUMAN ZYGOTE	45/2316	0.999898	1	0	0	0.623758	6.36691e-05	TRIM71;FHOD3;UHRF1;PALM2;GRIK4;IWS1;PRTG;HHAT;GLT1D1;YY2;CRTAC1;MGAT5B;CHEK1;KPNA7;PIP5K1B;RHPN2;JARID2;CNNM2;ERC2;CCDC141;SH3GL2;PKNOX2;ZBTB7C;ZSWIM3;NTRK2;GUCY1A2;PLEKHG1;TESC;ANKRD45;EBF1;GAB1;TEX14;VWA3B;TBX3;ENOX1;TRAIP;TIAM1;CDK7;PPP2R2C;SLCO2A1;KIT;CCDC6;B3GNT2;PGPEP1L;ZCCHC2
TRACHEA (BULK TISSUE)	45/2316	0.999898	1	0	0	0.623758	6.36691e-05	FHOD3;CEMIP;PCDHGB7;AHNAK;TENM4;PCDHGB5;PCDHGB4;HSPB8;GLIS3;LAMC2;PTPRK;SHB;FAM129B;TTN;PTPRG;GJA1;TSPAN9;SH3BP4;KPNA7;PIEZO1;CFAP43;PCDHGA7;VWF;SMURF1;PCDHGC5;PCDHGA2;FN1;DAB2IP;SHROOM3;LIFR;MCC;TBX3;ARHGAP23;PCDHGA9;EXT1;PCDHGA11;TANC1;ADGRD1;PCDHGA12;DNMBP;ADRB3;FAT1;PCDHGB1;ROR2;TLN2
BONE MARROW (BULK TISSUE)	41/2316	0.999986	1	0	0	0.568313	7.86048e-06	TCERG1;ANAPC15;HSP90AB1;ANP32A;PDGFA;ENO1;MSI2;TYMS;TSPAN32;EXOSC5;DPP6;DEPTOR;PAIP2;ACSS1;RREB1;SRSF11;ANKRD28;STPG1;DARS;TSC22D1;WTAP;FNBP1;TPM3;ESRRB;RPSA;IRAK3;SORL1;PNRC1;QTRT1;EEF1A1;NCOR1;ARPC2;KIT;PECAM1;EIF3H;MDM4;NCOA7;ANP32B;BCAT1;RNF220;MCM2
CD34+ CELL	41/2316	0.999986	1	0	0	0.568313	7.86048e-06	HSP90AB1;ANP32A;UHRF1;USP10;PDGFA;ENO1;TYMS;COX5A;TSPAN32;EXOSC5;CCND3;DEPTOR;CAPZB;PIEZO1;RALY;IGF2BP2;PAIP2;ACSS1;SRSF11;DARS;TSC22D1;FNBP1;TPM3;UROS;RPSA;IRAK3;EEF2;MAPK14;PNRC1;METTL23;EEF1A1;NCOR1;ARPC2;KIT;PECAM1;EIF3H;B3GNT2;ANP32B;BCAT1;RNF220;MCM2
CD19+ B CELLS	39/2316	0.999992	1	0	0	0.54059	4.28393e-06	PCDHGB5;CD80;PCDHGB2;ITPR1;NOD1;SIPA1L3;AKAP2;TTN;RELB;PCED1B;FAM53B;PIP5K1B;EPC2;CCDC141;ZSWIM3;PCDHGA7;KLF12;PLEKHG1;RNGTT;KDM4C;PCDHGA4;EBF1;LNPEP;INO80;SORL1;CDYL2;SETX;ADAM19;PCDHGA11;MYO1E;AIM2;KATNAL2;RAPGEF1;PCDHGB1;MDM4;BIRC6;CDK13;RAPGEF5;XKR6
COLON (BULK TISSUE)	38/2316	0.999993	1	0	0	0.526729	3.64523e-06	CEMIP;AHCYL2;DDC;IGSF3;SRC;CD80;GRIK3;LAMC2;PTPRK;SHB;SIPA1L2;DDX60;FAM129B;RELB;EPS8;TSPAN9;SH3BP4;KPNA7;PIP5K1B;RHPN2;ZBTB7C;PLEKHG1;VWF;DAB2IP;SHROOM3;TBX3;PLEKHA7;CD2AP;EXT1;MYO1E;DNMBP;SLCO2A1;FAT1;ROR2;TLN2;RAPGEF5;LGR4;TNFRSF21
KIDNEY (BULK TISSUE)	38/2316	0.999993	1	0	0	0.526729	3.64523e-06	SNAP47;CDCA3;UHRF1;CISD2;ENO1;TYMS;COX5A;HSPD1;PRTG;AKAP12;EXOSC5;SALL1;TRIM28;SALL4;IGF2BP1;FBRSL1;CTNNAL1;ESRRB;TIMM23;RPSA;ACTN4;ANK3;HSPE1;EEF2;TBX3;SRPK1;PCDHGA10;ENAH;EEF1A1;TFDP1;NASP;EIF3H;ANP32B;SAE1;SLC28A1;UBE2K;ATF4;MCM2
LUNG EPITHELIAL CELL	38/2316	0.999993	1	0	0	0.526729	3.64523e-06	PCDHGB7;PCDHGB5;SRC;UHRF1;WWC1;PALM2;PCDHGB2;LAMC2;SHB;TYMS;FAM129B;RELB;SPRED2;ARVCF;YY2;RPS6KA2;PRX;SH3BP4;UBTD1;ASIC1;YES1;NCOA3;SETD1A;DAB2IP;TEX14;RPSA;LIFR;EEF2;TRAIP;ARHGAP23;EEF1A1;PCDHGA11;TFDP1;TNIP1;ROR2;CUEDC1;MCM2;CCNJL
BLOOD PBMC	37/2316	0.999994	1	0	0	0.512867	3.29877e-06	CX3CR1;MAML2;SGMS1;AHNAK;TTYH2;NOD1;PTPRJ;DDX60;TAF5L;CDC14A;RELB;SEPT9;HHAT;CCND3;PCED1B;ANXA6;PIEZO1;FAM53B;UBTD1;CCDC141;ZSWIM3;KDM6A;KLF12;SMAD3;KDM4C;LIMK2;KLF3;CDYL2;ADAM19;METTL23;TIAM1;AIM2;TNIP1;MOB2;RAPGEF1;ARHGEF3;XKR6
ERYTHROBLAST	37/2316	0.999994	1	0	0	0.512867	3.29877e-06	CDCA3;IGSF3;CD80;TULP2;SHB;TYMS;TAF5L;TSPAN32;ARVCF;ZDHHC19;PRX;IGF2BP1;PIEZO1;FAM53B;PIP5K1B;IGF2BP2;ACSS1;MORC1;CFAP43;ZSWIM3;IQSEC1;TESC;UROS;SETD1A;GAB1;ELOVL6;KLF3;TRAIP;ARHGAP23;TFDP1;SP2;KIT;ULK1;ANP32B;XKR6;LGR4;MCM2
ALVEOLAR MACROPHAGE	36/2316	0.999994	1	0	0	0.499006	3.09439e-06	MAML2;SGMS1;CD80;ITPR1;TULP2;NOD1;PTPRJ;SIPA1L2;DDX60;TAF5L;HHAT;GLT1D1;EPB41L1;PDGFC;PCED1B;SH3BP4;CFAP43;TNS3;ZBTB7C;ZSWIM3;KSR1;ARL15;FN1;TEX14;IRAK3;CDYL2;TIAM1;PCDHGA12;RAB31;FMNL2;ADRB3;RAPGEF1;PECAM1;ALPK3;SGK1;ZCCHC2
PLASMA CELL	35/2316	0.999994	1	0	0	0.485145	2.95703e-06	DENND5B;TSHZ2;MRPS31;CISD2;GRIK4;TULP2;WDR45;AKAP2;HHAT;IMMP2L;DEPTOR;YY2;PHKG1;IRAK2;GNG7;PCED1B;PIP5K1B;SMYD3;ZSWIM3;WWOX;EGR1;DENND2C;CRADD;SLC39A11;GAB1;TEX14;ELL2;MANBAL;ADAM19;RNF168;AIM2;CCPG1;PECAM1;ROR2;XKR6
BLYMPHOCYTE	34/2316	0.999994	1	0	0	0.471284	2.85031e-06	CD80;PCDHGB2;ITPR1;NOD1;SIPA1L3;TAF5L;AKAP2;RELB;YY2;PCED1B;FAM53B;EPC2;CCDC141;ZSWIM3;KDM6A;PLEKHG1;SMAD3;KDM4C;IQSEC1;EED;SETD1A;EBF1;INO80;TMEM131;TRAIP;ADAM19;MYO1E;DNMBP;AIM2;RAPGEF1;RAPGEF5;XKR6;ZCCHC2;MCM2
CD4+ T CELL	34/2316	0.999994	1	0	0	0.471284	2.85031e-06	ATF1;CX3CR1;MAML2;TSHZ2;ITPR1;TULP2;NOD1;SLC2A3;DDX60;TSPAN32;CDC14A;TMEM267;HHAT;IMMP2L;CCND3;PCED1B;CCDC141;ARL6IP6;KLF12;SMAD3;KDM4C;CRADD;EED;PDE4D;ACSL6;RAB27A;TEX14;TTC39B;ADAM19;TIAM1;AIM2;SP2;ARHGEF3;XKR6
THYMUS (BULK TISSUE)	34/2316	0.999994	1	0	0	0.471284	2.85031e-06	GRAMD1B;TENM3;IGSF3;UHRF1;CD80;HSPB8;LAMC2;PTPRK;DDX60;TTN;SEPT9;SPRED2;HHAT;CCND3;FAM53B;PATZ1;CCDC141;CASP8AP2;KLF12;PLEKHG1;VWF;GALNT2;DAB2IP;BTBD11;LIFR;PLXDC1;MED13L;TIAM1;DNMBP;SLCO2A1;MDM4;ROR2;RAPGEF5;MCM2
NEUTROPHIL	33/2316	0.999994	1	0	0	0.457422	2.75717e-06	DGKG;CX3CR1;PFKFB3;TULP2;PTPRJ;SIPA1L2;LITAF;TSPAN32;CDC14A;RELB;GLT1D1;ZDHHC19;FAM53B;UBTD1;PIP5K1B;SUSD6;ZSWIM3;RAP1GAP2;IQSEC1;LIMK2;IRAK3;VWA3B;SORL1;AIM2;SP2;PECAM1;ALPK3;ULK1;SGK1;PGPEP1L;CUEDC1;ZCCHC2;CCNJL
SPLEEN (BULK TISSUE)	33/2316	0.999994	1	0	0	0.457422	2.75717e-06	CD80;HSPB8;NOD1;PTPRJ;DDX60;RELB;NDST1;ARVCF;DEPTOR;ZDHHC19;TSPAN9;PCED1B;PIEZO1;FAM53B;ZBTB7C;TNS1;GUCY1A2;PLEKHG1;VWF;IQSEC1;DAB2IP;EBF1;LIFR;IRAK3;CDYL2;TBX3;ARHGAP23;AIM2;ST5;SLCO2A1;RAPGEF1;ROR2;RAPGEF5
DENDRITIC CELL	32/2316	0.999994	1	0	0	0.443561	2.66985e-06	CX3CR1;AHNAK;TTYH2;KMT2C;CD80;JMJD1C;TULP2;IQGAP1;RBPJ;LITAF;COX5A;CDC14A;CAPZB;SUSD6;FNBP1;TPM3;STARD8;TET2;RPSA;COMMD1;FOXN2;YWHAZ;SETX;METTL23;EEF1A1;RAB31;AIM2;ARPC2;CCDC6;EIF3H;MDM4;PTPN2
MACROPHAGE	32/2316	0.999994	1	0	0	0.443561	2.66985e-06	PFKFB3;SGMS1;TTYH2;SRC;CD80;GLIS3;NOD1;PTPRJ;SHB;LITAF;FAM129B;RELB;YY2;ZDHHC19;IRAK2;UBTD1;TNS3;ZSWIM3;ASIC1;STARD8;SPATS1;TEX14;ELL2;CDYL2;MYO1E;RAB31;TNIP1;MOB2;RAPGEF1;B3GNT2;CUEDC1;ZCCHC2
CORD BLOOD	30/2316	0.999994	1	0	0	0.415838	2.50099e-06	AHNAK;KMT2C;TULP2;SLC2A3;ENO1;IQGAP1;LITAF;COX5A;TSPAN32;CCND3;ANXA6;JARID2;LYPLA1;FNBP1;TPM3;TESC;TET2;RPSA;IRAK3;COMMD1;HSPE1;FOXN2;EEF1A1;RAB31;ARPC2;EIF3H;MDM4;ANP32B;PTPN2;MCM2
HEPATOCYTE	29/2316	0.999994	1	0	0	0.401977	2.41742e-06	ALDH1L1;DDC;WWC1;TSHZ2;SHB;CTIF;ARVCF;GLT1D1;DEPTOR;SALL1;ZDHHC19;KCNT2;TSPAN9;SH3BP4;KPNA7;UBTD1;RHPN2;VWF;FN1;DAB2IP;TBX3;PLEKHA7;EXT1;SLCO2A1;ULK1;RAPGEF5;SLC28A1;LGR4;KANK4
ILEUM (BULK)	29/2316	0.999994	1	0	0	0.401977	2.41742e-06	AHCYL2;DDC;IGSF3;SRC;CD80;LAMC2;SHB;DDX60;FAM129B;RELB;EPS8;FAM53B;PIP5K1B;ACSS1;ZBTB7C;VWF;DAB2IP;SHROOM3;TBX3;PLEKHA7;MYO1E;DNMBP;AIM2;SLCO2A1;FAT1;ROR2;RAPGEF5;SLC28A1;LGR4
MORULA	28/2316	0.999994	1	0	0	0.388116	2.33399e-06	TRIM71;TULP2;SLC2A3;SHB;PRTG;SPRED2;GJA1;DEPTOR;SALL4;IGF2BP1;KPNA7;UBTD1;PIP5K1B;RHPN2;ERC2;MORC1;CHST8;PCDHGA2;ESRRB;TEX14;GDF3;TBX3;ENOX1;TRAIP;CDK7;TBCE;PGPEP1L;KANK4
PERIPHERAL BLOOD	28/2316	0.999994	1	0	0	0.388116	2.33399e-06	CX3CR1;AHNAK;TTYH2;CD80;NOD1;PTPRJ;DDX60;LITAF;TSPAN32;CDC14A;RELB;GLT1D1;ZDHHC19;PCED1B;FAM53B;ZSWIM3;RAP1GAP2;IQSEC1;TESC;LIMK2;IRAK3;SORL1;AIM2;MOB2;RAPGEF1;ARHGEF3;ZCCHC2;CCNJL
BLOOD DENDRITIC CELLS	27/2316	0.999994	1	0	0	0.374255	2.25061e-06	CX3CR1;AHNAK;KMT2C;JMJD1C;IQGAP1;RBPJ;COX5A;CAPZB;TPM3;STARD8;TET2;RPSA;COMMD1;HSPE1;FOXN2;YWHAZ;SETX;METTL23;EEF1A1;RAB31;AIM2;ARPC2;CCDC6;EIF3H;MDM4;FRYL;PTPN2
NATURAL KILLER CELLS	27/2316	0.999994	1	0	0	0.374255	2.25061e-06	CX3CR1;BNC2;GRIK4;NOD1;PTPRJ;DDX60;LITAF;TSPAN32;RELB;EXOSC5;CCND3;IRAK2;ZMAT4;PCED1B;FAM53B;ZSWIM3;KLF12;CRADD;TESC;NOSIP;TRAIP;METTL23;SP2;MOB2;KIT;ARHGEF3;CCNJL
GRANULOCYTE	26/2316	0.999994	1	0	0	0.360393	2.16724e-06	DGKG;CX3CR1;TULP2;PTPRJ;SIPA1L2;TSPAN32;CDC14A;RELB;GLT1D1;ZDHHC19;FAM53B;UBTD1;PIP5K1B;RICTOR;RAP1GAP2;IQSEC1;LIMK2;TET2;IRAK3;SORL1;AIM2;PECAM1;ALPK3;PGPEP1L;ZCCHC2;CCNJL
REGULATORY T CELLS	22/2316	0.999994	1	0	0	0.304948	1.83382e-06	ATF1;CX3CR1;SNAP47;CRADD;EED;CD80;DDX60;TSPAN32;CDC14A;METTL23;TIAM1;TMEM267;AIM2;SP2;MOB2;PCED1B;ARHGEF3;PIP5K1B;SMYD3;CCDC141;ZSWIM3;ARL6IP6
BLASTOCYST	21/2316	0.999994	1	0	0	0.291087	1.75046e-06	TRIM71;CDCA3;IGSF3;ESRRB;TULP2;GDF3;TBX3;FGF4;PRTG;GJA1;SALL4;IGF2BP1;SH3BP4;KPNA7;PIP5K1B;RHPN2;LGR4;KANK4;ZBTB7C;PTGES;RAI14
SPERM	21/2316	0.999994	1	0	0	0.291087	1.75046e-06	TSACC;SPATS1;PCDHGC4;GRIK3;GRIK4;TEX14;TULP2;VWA3B;NMNAT2;LYZL4;ENOX1;RIMS1;GLT1D1;ZDHHC19;MGAT5B;CCDC141;MORC1;CFAP43;TNFRSF21;PKNOX2;ZBTB7C
COLONIC MUCOSA	4/2316	0.999994	1	0	0	0.0554451	3.33422e-07	DDC;PIP5K1B;MORC1;LYZL4
TLYMPHOCYTE	13/2316	0.999994	0.999994	0	0	0.180197	1.08362e-06	ST8SIA1;CD80;PDGFA;RAB27A;NOSIP;TYMS;LITAF;ADAM19;RNF168;ARPC2;PCED1B;ARHGEF3;CNNM2

## Sheet: Disease Perturbations from GEO down
Term	Overlap	P-value	Adjusted P-value	Old P-value	Old Adjusted P-value	Odds Ratio	Combined Score	Genes
Crohn's disease DOID-8778 human GSE6731 sample 757	34/370	2.01504e-08	1.69061e-05	0	0	2.94998	52.2738	PGAP1;SPARC;USP10;CUL3;ARHGAP5;PDS5A;AKAP12;GJA1;NIPBL;ARFIP1;E2F3;DLEU2;GLTSCR1L;DARS;PPP1R12A;AUTS2;NCOA3;FN1;IRAK3;ANK3;FRMD4B;TOPORS;CD2AP;ICK;PPM1B;ZZZ3;TADA2A;KAT6B;PALLD;AGO2;SP3;CCDC6;TACC1;RAPGEF5
Ulcerative Colitis C0009324 human GSE6731 sample 249	29/354	2.355e-06	0.000987924	0	0	2.62988	34.0806	PHF3;PGAP1;CUL3;ARHGAP5;EPS8;NIPBL;SCAF8;GNG7;MXI1;REV3L;ARFIP1;TBL1X;GLTSCR1L;AUTS2;NCOA3;FOXJ3;FN1;GAB1;FRMD4B;HIPK1;YWHAZ;TOPORS;PNRC1;ICK;PPM1B;ZZZ3;AGPS;SP3;CCDC6
ulcerative colitis DOID-8577 human GSE6731 sample 759	27/384	7.78288e-05	0.0217661	0	0	2.25722	21.3556	PHF3;PGAP1;SGMS1;CUL3;ARHGAP5;SCAF8;MXI1;REV3L;ARFIP1;E2F3;GLTSCR1L;SRSF11;AUTS2;NCOA3;FN1;GAB1;FRMD4B;HIPK1;YWHAZ;TOPORS;PNRC1;ICK;PPM1B;ZZZ3;SP3;CCDC6;RAPGEF5
bronchopulmonary dysplasia UMLS CUI-C0006287 human GSE8586 sample 918	26/364	8.13121e-05	0.0170552	0	0	2.29305	21.5942	MACF1;SPARC;HSPB8;RTN4;IGF1R;ABLIM1;TRIM28;ANXA6;TNS1;EGR1;TSC22D1;VWF;FN1;ATP2B4;SHROOM3;RPSA;ACTN4;EEF2;PCDHGA9;EEF1A1;ARPC2;PALLD;ST5;MYH9;ANP32B;ATF4
Parkinson's disease DOID-14330 human GSE19587 sample 740	18/207	8.94619e-05	0.0150117	0	0	2.79154	26.0219	HSPA8;HSP90AA1;SPARC;TSC22D1;DSTN;RPSA;FGF1;YWHAZ;RTN4;HSPD1;EEF1A1;GJA1;RAB31;MXI1;FAT1;PKP4;ANP32B;TNS3
ulcerative colitis DOID-8577 human GSE6731 sample 760	23/314	0.000142569	0.019936	0	0	2.35147	20.8239	PHF3;PGAP1;AUTS2;NCOA3;CUL3;GAB1;ANK3;FRMD4B;ARHGAP5;TOPORS;CDC14A;CD2AP;EPS8;ICK;NIPBL;SCAF8;PPM1B;ZZZ3;GNG7;SP3;MXI1;ARFIP1;FRYL
hepatitis C DOID-1883 human GSE20948 sample 599	22/305	0.000245122	0.0293797	0	0	2.31561	19.2514	HSP90AA1;CLTC;FN1;DSTN;ACTN4;IQGAP1;YWHAZ;RTN4;ENAH;GJA1;UBL3;RAB31;CAPZB;PALLD;PIEZO1;MYH9;COX1;SGK1;TNS3;TNFRSF21;MAP4K4;RAI14
Diabetic Nephropathy C0011881 human GSE1009 sample 223	27/414	0.000265822	0.0278781	0	0	2.09366	17.2364	SPARC;AHNAK;SLC2A3;FGF1;RTN4;SEPT9;DPP6;CAPZB;PIEZO1;SPTAN1;HSPA8;HSP90AA1;TSC22D1;FNBP1;DSTN;ACTN4;EEF2;YWHAZ;CD2AP;PCDHGA9;MYO1E;STK24;ARPC2;PALLD;FAT1;MYH9;ATF4
Cardiac Hypertrophy C1383860 rat GSE1055 sample 354	29/467	0.000361138	0.0336661	0	0	1.99353	15.8012	MACF1;HSP90AB1;SPARC;AHNAK;ENO1;MSI2;TTN;HSPD1;CCND3;CAPZB;TRIM28;TNS3;SPTAN1;YWHAG;TNS1;HSP90AA1;PCDHGA1;FN1;TIMM23;DSTN;ACTN4;EEF2;YWHAZ;ARPC2;FAT1;MYH9;RAF1;EIF3A;ATF4
Parkinson's disease DOID-14330 human GSE19587 sample 496	24/361	0.00043517	0.0365108	0	0	2.13425	16.5186	MACF1;NTRK2;SPARC;TSC22D1;AUTS2;FNBP1;HSPB8;CLTC;DSTN;ANK2;RPSA;ENO1;FGF1;EEF2;PCDHGA9;EEF1A1;SEPT9;GJA1;RAB31;ST5;FAT1;ANP32B;SGK1;SPTAN1
prostate cancer DOID-10283 human GSE3868 sample 639	24/362	0.000452775	0.0345344	0	0	2.12836	16.3886	CEMIP;SPARC;TSC22D1;IDH1;RPSA;ENO1;ACTN4;EEF2;LITAF;RTN4;EPS8;EEF1A1;GJA1;GSTA4;MXI1;FAT1;ANXA6;MYH9;EIF3H;ANP32B;IGF2BP2;TNS3;ATF4;RAI14
ALS (Amyotrophic Lateral Sclerosis) C0002736 mouse GSE4390 sample 389	24/368	0.000572103	0.0399995	0	0	2.09366	15.6316	NSF;MACF1;HSP90AA1;TSC22D1;CLTC;ITPR1;DSTN;ANK3;FGF1;YWHAZ;RTN4;EPN1;STRN3;GJA1;ATXN2;DPP6;UBL3;SYT11;QK;BCAT1;SPTAN1;YWHAG;TNRC6A;PAFAH1B1
Crohn's disease DOID-8778 human GSE6731 sample 758	19/263	0.000622669	0.0401861	0	0	2.31921	17.1192	PGAP1;AUTS2;NCOA3;CUL3;GAB1;ANK3;FOXN3;ARHGAP5;YWHAZ;TOPORS;CDC14A;CD2AP;PPM1B;KAT6B;SP3;MXI1;ARFIP1;GLTSCR1L;SGK1
glioblastoma UMLS CUI-C0017636 human GSE15824 sample 862	20/285	0.00065352	0.0391645	0	0	2.25282	16.5203	CDK17;PFKFB3;SLC44A1;SGMS1;FNBP1;IFT80;ANK3;ARHGAP5;FOXN2;PPM1B;SALL1;FMNL2;SLTM;LCOR;ANP32B;RAPGEF5;SRSF11;YWHAG;RNF220;MAP4K4
HIV encephalitis C0276548 human GSE3489 sample 2	18/249	0.000850435	0.0475677	0	0	2.32068	16.4067	NSF;RAP1GAP2;HSPA8;HSP90AA1;HSP90AB1;ANP32A;CCDC57;SLC2A3;EEF2;YWHAZ;SYN1;RTN4;HSPD1;EEF1A1;CTIF;ST5;TRIM16;PAFAH1B1
oligodendroglioma DOID-3181 human GSE15824 sample 858	21/313	0.000864295	0.0453215	0	0	2.15386	15.1924	CDK17;HSP90AA1;TTYH2;SLC44A1;FNBP1;IFT80;ANK3;PTPRK;FGF1;FOXN2;LITAF;RTN4;GJA1;PPM1B;FMNL2;NCOA7;PKP4;ANP32B;RAPGEF5;RNF220;MAP4K4
relapsing-remitting multiple sclerosis DOID-2378 human GSE16461 sample 879	23/359	0.00093914	0.0463493	0	0	2.05672	14.3365	CDK17;TCERG1;EGR1;BRD1;HSP90AA1;PFKFB3;HSP90AB1;CUL3;JMJD1C;EEF2;HSPE1;YWHAZ;PNRC1;HSPD1;SCAF8;ABLIM1;KAT6A;PAPD5;MXI1;MYH9;COX1;TOP1;JARID2
schizophrenia DOID-5419 human GSE25673 sample 892	22/337	0.000942496	0.0439308	0	0	2.09573	14.6009	GUCY1A2;ALDH1L1;PFKFB3;TENM4;BNC2;GDF3;ELL2;ADAM19;GJA1;HHAT;ABLIM1;SALL1;RAB31;FMNL2;PDGFC;NCAM1;RHPN2;BCAT1;SH3GL2;FGFR2;TNFRSF21;RNF220
Rift Valley fever DOID-1328 mouse GSE18064 sample 876	23/360	0.000974696	0.0430405	0	0	2.05101	14.2204	TGIF1;EGR1;CASP8AP2;HSPA8;HSP90AA1;HSP90AB1;TSC22D1;AHNAK;WTAP;TIMM23;HSPE1;FAM129B;HSPD1;AKAP12;TRIM28;GSTA4;PDGFC;ANP32B;SGK1;TNS3;YWHAG;EIF3A;ATF4
breast cancer DOID-1612 human GSE9574 sample 448	18/256	0.00116701	0.048956	0	0	2.25722	15.2437	CX3CR1;EGR1;HSPA8;HSP90AA1;SPARC;TSC22D1;AHNAK;EEF2;YWHAZ;ENAH;EEF1A1;SCAF8;GSTA4;TRPS1;KIT;FAT1;EIF3H;SGK1
hepatitis C DOID-1883 human GSE20948 sample 597	20/299	0.00117842	0.0470808	0	0	2.14734	14.4808	PFKFB3;HSPB8;FN1;DSTN;ACTN4;SIPA1L2;RTN4;ENAH;GJA1;ABLIM1;UBL3;PALLD;PDGFC;PIEZO1;MYH9;COX1;SGK1;TNS3;TNFRSF21;RAI14
astrocytoma DOID-3069 human GSE15824 sample 861	20/299	0.00117842	0.0449408	0	0	2.14734	14.4808	CDK17;HSP90AA1;TTYH2;SLC44A1;FNBP1;IFT80;ANK3;PTPRK;FGF1;FOXN2;RTN4;PPM1B;FMNL2;MXI1;NCOA7;PKP4;ANP32B;RAPGEF5;YWHAG;MAP4K4
Cancer of prostate C0376358 human GSE3868 sample 135	23/369	0.0013506	0.0492676	0	0	2.00098	13.2209	CEMIP;SPARC;TSC22D1;IDH1;RPSA;ENO1;ACTN4;EEF2;LITAF;PCDHGA9;EPS8;AKAP12;EEF1A1;GJA1;MXI1;FAT1;ANXA6;MYH9;EIF3H;ANP32B;IGF2BP2;TNS3;ATF4
B-cell chronic lymphocytic leukaemia/small lymphocytic lymphoma C0023458 human GSE8835 sample 194	23/372	0.00150088	0.0524683	0	0	1.98485	12.9049	SRRM2;CX3CR1;DARS;HSPA8;HSP90AA1;AUTS2;IQSEC1;RBPJ;HIPK1;YWHAZ;SORL1;PRRC2B;RTN4;HSPD1;PPM1A;ABLIM1;ARPC2;KAT6A;WAC;MYH9;TRIP12;TAB2;QRICH1
cardiomyopathy DOID-0050700 human GSE9128 sample 781	20/310	0.00181252	0.0608283	0	0	2.07114	13.0752	RAP1GAP2;TCERG1;GSK3B;BRD1;GGNBP2;YES1;PFKFB3;TSC22D1;AUTS2;PDE4D;JMJD1C;TSPAN32;GATAD2A;SCAF8;PPM1B;HMGXB4;ZMIZ1;AP1G1;JARID2;SRSF11
oligodendroglioma DOID-3181 human GSE15824 sample 859	20/310	0.00181252	0.0584888	0	0	2.07114	13.0752	CDK17;HSP90AA1;TTYH2;SLC44A1;FNBP1;IFT80;ANK3;FGF1;SORL1;RTN4;PPM1B;FMNL2;MXI1;COX1;NCOA7;PKP4;ANP32B;RAPGEF5;YWHAG;MAP4K4
tibial muscular dystrophy DOID-9884 human GSE42806 sample 539	21/335	0.00200205	0.0622118	0	0	2.01241	12.5043	SPEN;EGR1;HSP90AB1;PPP1R12A;AUTS2;VWF;KMT2C;CHD8;SAMD4B;SIPA1L2;CBFA2T2;ELL2;FBXO11;HSPD1;NIPBL;SCAF8;MXI1;RICTOR;MALAT1;MDM4;DLEU2
osteoarthritis DOID-8398 human GSE16464 sample 752	15/206	0.0020769	0.0622329	0	0	2.33758	14.4389	EGR1;IDH1;FN1;RPSA;RBPJ;EEF2;PNRC1;AKAP12;EEF1A1;UBL3;RPS6KA2;COX1;MALAT1;SGK1;ATF4
colitis DOID-0060180 human GSE6731 sample 761	22/359	0.00210113	0.060788	0	0	1.9673	12.1289	GSK3B;TSC22D1;AUTS2;WTAP;NCOA3;CUL3;ANK3;FRMD4B;FOXN3;TOPORS;CDC14A;CD2AP;EPS8;NIPBL;SCAF8;GNG7;SP3;MXI1;PIP5K1B;TACC1;TBL1X;FRYL
Parkinson's disease DOID-14330 human GSE19587 sample 1080	13/167	0.00225044	0.0629372	0	0	2.49901	15.2356	SPARC;AHNAK;DSTN;RPSA;FGF1;RTN4;EEF1A1;GJA1;FAT1;PKP4;ANP32B;SGK1;TNFRSF21
Muscular Dystrophy C0026850 mouse GSE2507 sample 405	20/322	0.00281316	0.0761369	0	0	1.99396	11.7114	ATF1;ANKRD28;HSPA8;TPM3;CUL3;TIMM23;EEF2;MAPK14;TMEM131;STRN3;PPM1A;UBL3;RPS6KA2;DNAJA2;CCDC6;DYM;TAB2;SGK1;PAIP2;YWHAG
Alzheimer's disease DOID-10652 human GSE4757 sample 592	22/369	0.00293766	0.0770219	0	0	1.91398	11.1588	RAP1GAP2;MACF1;GRAMD1B;HSP90AA1;PFKFB3;TENM4;ATP2B4;PTPRK;YWHAZ;RTN4;EEF1A1;ABR;GJA1;LASP1;FMNL2;GSTA4;TRPS1;EIF3H;MALAT1;MAPT;SH3GL2;YWHAG
Lung Injury C0273115 human GSE1541 sample 67	21/346	0.00293799	0.0746961	0	0	1.94843	11.3594	MACF1;HSPA8;LYPLA1;HSP90AA1;CTBP2;TSC22D1;CUL3;CLTC;DSTN;TYMS;LITAF;COX5A;MID1;RTN4;NCOR2;SEPT9;STK24;FAT1;EIF3H;EIF3A;ATF4
astrocytoma DOID-3069 human GSE15824 sample 860	19/301	0.00296892	0.0732625	0	0	2.02642	11.7929	CDK17;HSP90AA1;TTYH2;SLC44A1;FNBP1;IFT80;ANK3;PTPRK;FGF1;FOXN2;RTN4;PPM1B;FMNL2;NCOA7;PKP4;ANP32B;RAPGEF5;YWHAG;MAP4K4
myotonic dystrophy type 1 DOID-11722 human GSE7179 sample 1050	16/239	0.00348569	0.0835569	0	0	2.14914	12.1622	DARS;HSP90AA1;SPARC;HSP90AB1;IDH1;FN1;SLC2A3;ENO1;EEF2;RTN4;EEF1A1;PRTG;FAT1;COX1;MALAT1;ANP32B
polycystic ovary syndrome DOID-11612 human GSE34526 sample 797	15/218	0.00356254	0.0830271	0	0	2.2089	12.4522	FHOD3;HSP90AA1;SPARC;TSC22D1;SGMS1;AUTS2;DSTN;GJA1;DEPTOR;DNAJA2;CCDC6;COX1;SGK1;CTNNAL1;YWHAG
Senescence C0001792 human GSE1572 sample 408	19/314	0.00468821	0.106308	0	0	1.94252	10.4172	NSF;CX3CR1;EPHA4;MACF1;HSPA8;MAP2K1;HSP90AB1;ITPR1;ANK2;NMNAT2;EEF2;YWHAZ;NUDT3;SYN1;RTN4;EEF1A1;ROR2;SRGAP3;DLGAP4
Sendai virus infection C1319860 mouse GSE10211 sample 82	18/292	0.0048219	0.106463	0	0	1.97894	10.5568	ZMYND8;ANK3;MAPK14;SPPL3;SORL1;GGTA1;IGF1R;NCOR2;GJA1;NCOR1;RPS6KA2;MXI1;REV3L;NCAM1;ACSS1;SPTAN1;FGFR2;BMPR1A
glioblastoma UMLS CUI-C0017636 human GSE15824 sample 863	19/316	0.00501409	0.107867	0	0	1.93023	10.2215	HSP90AA1;TTYH2;SLC44A1;FNBP1;ANK3;PTPRK;FGF1;FOXN2;RTN4;PPM1B;FMNL2;MXI1;COX1;PKP4;ANP32B;RAPGEF5;YWHAG;RNF220;MAP4K4
bronchopulmonary dysplasia UMLS CUI-C0006287 human GSE8586 sample 919	18/295	0.00535162	0.11225	0	0	1.95881	10.2453	EGR1;HSP90AB1;TSC22D1;FN1;ATP2B4;DSTN;ACTN4;EEF2;LASP1;RAB31;ARPC2;PALLD;ANXA6;MYH9;COX1;MALAT1;SGK1;RAI14
Atherosclerosis C0004153 human GSE420 sample 234	17/274	0.00568501	0.116335	0	0	1.99178	10.2973	RAP1GAP2;SPARC;AHNAK;FN1;DSTN;ENO1;PRRC2B;EPS8;EXT1;EEF1A1;GJA1;ARVCF;TNIP1;PALLD;ST5;MYH9;MCM2
myotonic dystrophy type 1 DOID-11722 human GSE7178 sample 1052	16/252	0.00578576	0.115577	0	0	2.03827	10.5019	ANKRD17;HSP90AA1;PFKFB3;CTBP2;EEF2;PRTG;GJA1;SCAF8;NASP;SALL4;FAT1;COX1;MALAT1;TOP1;JARID2;YWHAG
prolactinoma DOID-5394 human GSE36314 sample 636	24/440	0.00593709	0.115842	0	0	1.75106	8.97686	PHF3;TGIF1;PGAP1;YES1;AHNAK;TSC22D1;ITPR1;DSTN;FRMD4B;FGF1;CELSR1;HSPE1;LITAF;PNRC1;HSPD1;GJA1;STK24;PALLD;MXI1;TLK1;TBL1X;SRSF11;SH3GL2;ATF4
Duchenne muscular dystrophy (DMD) C0013264 mouse GSE1025 sample 144	17/276	0.00610152	0.116345	0	0	1.97734	10.0829	ANKRD28;SPARC;ERDR1;TPM3;MRPS31;TIMM23;HSPE1;YWHAZ;NUDT3;GJA1;TRIM28;UBE2R2;TSPAN9;RPS6KA2;CCDC6;SMYD1;TAB2
autism spectrum disorder DOID-0060041 human GSE62632 sample 1036	18/301	0.00655412	0.122198	0	0	1.91976	9.65193	PHF3;TGIF1;NRP2;MAML2;MOK;GLIS3;CCPG1;TRPS1;SIK3;REV3L;TSPAN5;JARID2;BCAT1;SOS1;JAM2;FGFR2;TNFRSF21;ASIC1
Turner Syndrome C0041408 mouse GSE1606 sample 218	19/329	0.007616	0.138909	0	0	1.85396	9.04268	HSP90AA1;ERDR1;TSC22D1;DSTN;NUDT3;EPN1;STRN3;HSPD1;PCDHGA10;GJA1;PCM1;DPP6;NCOR1;XPNPEP1;AGO2;QK;TAB2;ARIH1;MAPT
Uterine leiomyoma C0042133 human GSE593 sample 16	19/330	0.00785462	0.140213	0	0	1.84834	8.95826	EGR1;HSP90AB1;TSC22D1;AHNAK;VWF;DSTN;SLC2A3;YWHAZ;RTN4;AKAP12;EEF1A1;SEPT9;ABLIM1;SLCO2A1;PECAM1;MYH9;SGK1;CTNNAL1;TNS1
Hypotensive episode C0520541 rat GSE2401 sample 388	16/261	0.00800363	0.139897	0	0	1.96798	9.50115	HSPA8;HSP90AA1;HSP90AB1;IDH1;FN1;ARHGAP17;ENO1;EEF2;HSPE1;HSPD1;NCOR2;CAPZB;ZMIZ1;MXI1;COX1;PGPEP1
Type 2 diabetes mellitus C0011860 rat GSE6428 sample 291	19/331	0.00809925	0.138679	0	0	1.84275	8.87468	HSPA8;HSP90AA1;DDC;HIP1;HSP90AB1;TESC;C1GALT1;FN1;DSTN;RPSA;ENO1;EEF2;LITAF;YWHAZ;EEF1A1;SEPT9;UBL3;FAT1;TNS3
multiple sclerosis DOID-2377 human GSE16461 sample 584	24/452	0.00816201	0.136959	0	0	1.70457	8.19602	CDK17;TCERG1;EGR1;RPSA;LITAF;YWHAZ;EEF1A1;SCAF8;ABLIM1;LASP1;ARPC2;TRIM28;SLTM;KAT6A;MXI1;PCED1B;WAC;EIF3H;EPC1;MYH9;COX1;ANP32B;DENND6A;ATF4
Alpha-1 anti-trypsin deficiency C0221757 human GSE1122 sample 281	20/356	0.00840798	0.13832	0	0	1.80352	8.61827	SPARC;ANP32A;VWF;CLTC;DSTN;RPSA;ENO1;PTPRK;HSPE1;COX5A;PCDHGA9;ARVCF;CCND3;ABLIM1;RAB31;ARPC2;SLCO2A1;SCAP;ANP32B;ATF4
myelodysplastic syndrome DOID-0050908 human GSE19429 sample 812	18/309	0.00848983	0.13698	0	0	1.87006	8.91811	TCERG1;EGR1;HSPA8;HSP90AB1;UHRF1;EBF1;YWHAZ;SORL1;AKAP12;EEF1A1;SEPT9;ZMIZ1;EIF3H;MALAT1;MDM4;SGK1;PAIP2;ATF4
breast cancer DOID-1612 human GSE14943 sample 504	13/197	0.00897853	0.142132	0	0	2.11845	9.9841	CEMIP;TSC22D1;USP10;GALNT2;HSPB8;NMNAT2;EEF2;MAPK14;CRKL;ZMIZ1;CCDC6;TNS3;TNFRSF21
Anxiety Disorder C0003469 rat GSE932 sample 111	15/242	0.00912701	0.141807	0	0	1.98984	9.34531	NSF;HSPA8;HSP90AA1;PTPRJ;ENO1;HSPE1;YWHAZ;EPN1;HSPD1;GNG7;DNAJA2;COX1;BCAT1;SPTAN1;YWHAG
Serous carcinoma C0206701 human GSE10971 sample 58	18/313	0.00961706	0.146704	0	0	1.84616	8.57398	EGR1;HSP90AA1;PFKFB3;RPSA;HIPK1;EEF2;LITAF;SORL1;EEF1A1;PCM1;SALL1;SLTM;ST5;MXI1;TACC1;MALAT1;RHPN2;CFAP43
myotonic dystrophy type 1 DOID-11722 human GSE7177 sample 1054	19/337	0.00969947	0.145319	0	0	1.80995	8.39034	HSPA8;HSP90AA1;HSP90AB1;PPP1R12A;DSTN;EEF2;YWHAZ;AKAP12;RCAN1;GJA1;ARPC2;PDGFC;FAT1;COX1;ANP32B;SGK1;YWHAG;ATF4;RAI14
Niemann-Pick disease Type C DOID-14504 mouse GSE39621 sample 469	17/290	0.00975976	0.143657	0	0	1.88188	8.71216	EGR1;HSPA8;MAP2K1;HSP90AA1;HSP90AB1;ITPR1;COX5A;EEF1A1;TIAM1;UBL3;SYT11;GNG7;PKP4;MAPT;SGK1;PAIP2;SOX2OT
Osteolysis C0029435 human GSE755 sample 128	17/293	0.0107344	0.155278	0	0	1.86262	8.44566	CX3CR1;AHNAK;FNBP1;IQSEC1;DSTN;LITAF;CD2AP;PCDHGA9;HSPD1;ADAM19;EEF1A1;ABLIM1;TNIP1;GNG7;ANXA6;ROR2;ATF4
LGLL - Large granular lymphocytic leukemia C1522378 human GSE10631 sample 47	14/225	0.0111756	0.158921	0	0	1.9975	8.97682	HSPA8;HSP90AB1;NOSIP;RPSA;SLC2A3;ENO1;TYMS;EEF2;SORL1;HSPD1;TRIM28;EIF3H;ANP32B;ATF4
Generalized seizures C0234533 rat GSE1156 sample 342	18/318	0.0111911	0.156489	0	0	1.81714	8.16372	NSF;TSC22D1;CLTC;EEF2;HSPE1;YWHAZ;SYN1;RIMS1;GJA1;DPP6;XPNPEP1;SYT11;COX1;NCAM1;MAPT;BCAT1;TNS3;SH3GL2
Anterior Horn Cell Disease C0154681 human GSE1481 sample 208	19/346	0.0125656	0.172829	0	0	1.76287	7.7157	EGR1;SPARC;IDH1;FN1;DSTN;ANK3;RBPJ;EEF2;COX5A;RTN4;AKAP12;EEF1A1;GJA1;UBL3;ANP32B;SGK1;TNS3;SRSF11;MAP4K4
Inflammatory papules (Acne) 6543 human GSE6475 sample 459	17/301	0.0137138	0.185579	0	0	1.81311	7.77707	HSP90AA1;SPARC;HSP90AB1;TSC22D1;AHNAK;FN1;DSTN;PTPRK;EEF2;RTN4;EEF1A1;UBL3;PDGFC;KIT;MXI1;EIF3H;ANP32B
hepatitis C DOID-1883 human GSE20948 sample 598	17/302	0.0141277	0.188145	0	0	1.80711	7.69758	HSPA8;HSP90AA1;PFKFB3;DSTN;ACTN4;HSPE1;YWHAZ;RTN4;ENAH;LASP1;RAB31;CAPZB;PALLD;MYH9;SGK1;MAP4K4;RAI14
Huntington's disease DOID-12858 human GSE1751 sample 796	18/327	0.0145347	0.190541	0	0	1.76712	7.47708	CX3CR1;HSPA8;HSP90AB1;FNBP1;TESC;NOD1;ENO1;ACTN4;EEF2;SORL1;GATAD2A;SEPT9;CCND3;LASP1;CAPZB;ANXA6;MYH9;ATF4
Leukemia DOID-1240 mouse GSE44025 sample 482	17/303	0.0145514	0.187824	0	0	1.80114	7.61896	RAP1GAP2;A;DDC;TSC22D1;DNMT3A;TET2;TEX2;AKAP2;ADAM19;PRTG;GK5;ABR;ATXN2;PIGL;TACC2;TNS3;ZCCHC2
Dental cavity, complex C0399396 human GSE1629 sample 175	21/401	0.0147324	0.18728	0	0	1.68119	7.09076	HSP90AB1;SPARC;AHNAK;TSC22D1;DSTN;PTPRK;ARHGAP5;EEF2;TBX3;RTN4;PCDHGA9;AKAP12;EEF1A1;TIAM1;GJA1;CCND3;PDGFC;KIT;MXI1;FAT1;EIF3H
Meningococcal infection C0025303 human GSE4646 sample 347	13/213	0.0163858	0.20519	0	0	1.95932	8.05543	CTBP2;AHNAK;ZMYND8;IDH1;FN1;RPSA;ACTN4;COX5A;EEF1A1;CCND3;ARPC2;KIT;RAI14
HIV - Human immunodeficiency virus infection C0019693 human GSE6740 sample 419	15/260	0.0166789	0.205788	0	0	1.85208	7.5817	CDK17;HSP90AB1;TSC22D1;NOSIP;RPSA;SLC2A3;EEF2;LITAF;PNRC1;SCAF8;CCND3;TRIM28;B3GNT2;EIF3H;ATF4
cardiomyopathy DOID-0050700 human GSE9128 sample 780	13/215	0.0175671	0.213605	0	0	1.9411	7.84538	RAP1GAP2;GSK3B;BRD1;SPARC;YES1;PFKFB3;AUTS2;CHD8;SEPT9;HMGXB4;FAM53B;JARID2;BRD4
Bipolar Disorder 3312 human GSE12654 sample 461	18/334	0.0176398	0.211426	0	0	1.73009	6.98539	SRRM2;NSF;RAP1GAP2;UROS;YWHAZ;SORL1;SYN1;PCDHGA9;HSPD1;DPP6;LASP1;EPB41L1;ST5;MYH9;ULK1;SPTAN1;DLGAP4;WDTC1
anemia DOID-2355 human GSE4619 sample 792	17/311	0.0183077	0.216341	0	0	1.75481	7.02	TCERG1;EGR1;PFKFB3;TSC22D1;UHRF1;SLC2A3;TYMS;YWHAZ;SORL1;RTN4;EEF1A1;COX1;MALAT1;DENND6A;SGK1;PAIP2;SRSF11
Huntington's disease DOID-12858 human GSE3248 sample 724	17/312	0.0188254	0.219368	0	0	1.74919	6.94873	SPARC;ERDR1;FNBP1;ITPR1;TIMM23;FGF1;YWHAZ;RTN4;STRN3;TIAM1;UBL3;TSPAN9;KIT;PKP4;QRICH1;SPTAN1;KDM6A
multiple sclerosis DOID-2377 human GSE38010 sample 737	16/290	0.0200436	0.230364	0	0	1.77119	6.92506	CX3CR1;HSPA8;SPARC;HSP90AB1;TTYH2;SLC44A1;HSPB8;ENO1;FGF1;LITAF;PNRC1;EEF1A1;ANP32B;SGK1;RAPGEF5;MAP4K4
Sickle Cell Anemia C0002895 human GSE9877 sample 109	12/197	0.0208751	0.236678	0	0	1.9555	7.56621	ENAH;EEF1A1;MACF1;DARS;HSPA8;HSP90AA1;VWF;FN1;ENO1;IGF2BP2;SGK1;EEF2
Dystonia C0393593 human GSE3064 sample 329	17/317	0.0215845	0.241459	0	0	1.7216	6.60367	NSF;CX3CR1;EPHA4;GSK3B;MAP2K1;CELF1;CLTC;ITPR1;ANK2;EEF2;YWHAZ;SYN1;RTN4;ABR;DPP6;SPTAN1;SH3GL2
prostate cancer DOID-10283 human GSE3868 sample 638	18/344	0.0229393	0.253237	0	0	1.67979	6.34106	CEMIP;SPARC;TSC22D1;IDH1;FN1;DSTN;RPSA;ACTN4;EEF2;PCDHGA9;EPS8;AKAP12;EEF1A1;GJA1;PALLD;ANXA6;ANP32B;ATF4
Nutritional deficiency, NEC C0267975 mouse GSE1776 sample 422	19/370	0.0235422	0.256518	0	0	1.64852	6.18023	SNAP47;SPARC;HSP90AB1;TSC22D1;ACSL6;FN1;DSTN;FAM129B;TTN;NCOR2;CCND3;ABLIM1;DEPTOR;ARPC2;TSPAN9;PALLD;ANXA6;MYO18A;MYH9
autism spectrum disorder DOID-0060041 human GSE62632 sample 1037	23/472	0.0236552	0.254445	0	0	1.56433	5.85711	PHF3;PCDHGB4;FN1;JMJD1C;IFT80;LIFR;BAZ2B;GDF3;RBPJ;SIPA1L2;PDS5A;SETX;PRTG;NIPBL;GLT1D1;PCM1;SLTM;TBL1XR1;MALAT1;BIRC6;DLEU2;FRYL;TNRC6A
diabetes mellitus type 2 DOID-9352 human GSE12643 sample 766	18/346	0.0241311	0.256279	0	0	1.67008	6.21981	ST8SIA1;IDH1;NMNAT2;RBPJ;TYMS;PDS5A;LITAF;MID1;PNRC1;TTN;EPS8;GJA1;RPS6KA2;SP3;REV3L;TBL1X;BCAT1;PTGES
autism spectrum disorder DOID-0060041 human GSE25507 sample 1021	18/346	0.0241311	0.253075	0	0	1.67008	6.21981	HSPA8;MAP2K1;HSP90AA1;SPARC;HSP90AB1;ARHGAP17;IQGAP1;EEF2;YWHAZ;SORL1;PNRC1;RAB31;PECAM1;COX1;ANP32B;SGK1;PAIP2;YWHAG
Malignant Melanoma C0025202 human GSE3189 sample 117	14/250	0.0253991	0.263085	0	0	1.79775	6.60322	EGR1;SPARC;TSC22D1;AHNAK;AUTS2;VWF;DSTN;RPSA;PTPRK;EEF1A1;GJA1;ABLIM1;PECAM1;TNS1
Huntington's disease DOID-12858 mouse GSE3248 sample 725	17/324	0.0259521	0.265534	0	0	1.6844	6.1506	MACF1;HSPA8;TSC22D1;ITPR1;FGF1;RTN4;EPN1;STRN3;TIAM1;SPRED2;GJA1;ABLIM1;UBL3;TSPAN9;KIT;PKP4;SPTAN1
Polycystic Ovary Syndrome C0032460 human GSE5090 sample 308	15/275	0.0260385	0.263208	0	0	1.75106	6.38817	HSPA8;HSP90AB1;FN1;DSTN;ENO1;PNRC1;HSPD1;EEF1A1;GJA1;DNMBP;TBL1XR1;ANXA6;PIEZO1;SGK1;ATF4
schizophrenia DOID-5419 human GSE21935 sample 855	18/350	0.0266552	0.266235	0	0	1.651	5.98448	HSPA8;HSP90AA1;TTYH2;SLC44A1;IQSEC1;ENO1;FGF1;SORL1;DPP6;UBL3;FMNL2;SYT11;MXI1;ANXA6;MYO18A;SGK1;RAPGEF5;ATF4
Parkinson's disease DOID-14330 human GSE6613 sample 788	17/326	0.0273142	0.269607	0	0	1.67407	6.02723	CX3CR1;HSPA8;HSP90AB1;RPSA;ENO1;PNRC1;EEF1A1;PPM1A;LASP1;TNIP1;MXI1;ANXA6;TSPAN5;EIF3H;ANP32B;IGF2BP2;ATF4
Diabetic Retinopathy C0011884 rat GSE1979 sample 189	14/254	0.0285582	0.278609	0	0	1.76944	6.2918	NSF;EGR1;DARS;HSPA8;HSP90AB1;TSC22D1;RPSA;ENO1;EEF2;HSPE1;COX1;MAPT;BCAT1;TNS3
Hepatic Cirrhosis C0023890 rat GSE1843 sample 372	16/303	0.0286183	0.275986	0	0	1.69519	6.02423	MACF1;EGR1;HSPA8;CTBP2;TSC22D1;ARL15;CLTC;GAB1;STRN3;TSPAN9;PECAM1;COX1;TACC1;SGK1;RAPGEF5;ATF4
myotonic dystrophy type 1 DOID-11722 human GSE7178 sample 1051	15/279	0.0290918	0.277364	0	0	1.72595	6.10521	EGR1;PFKFB3;TSC22D1;EEF2;YWHAZ;PRTG;GJA1;SCAF8;PDGFC;FAT1;COX1;MALAT1;SRSF11;YWHAG;RAI14
Huntington's disease DOID-12858 human GSE24250 sample 466	19/379	0.0291567	0.274859	0	0	1.60937	5.68924	CX3CR1;HSP90AB1;TSC22D1;TESC;RPSA;EEF2;LITAF;SORL1;EEF1A1;SEPT9;CCND3;LASP1;ABLIM1;STK24;KAT6A;MXI1;MYH9;EIF3H;ANP32B
Waldenstrom Macroglobulinemia UMLS CUI-C0024419 human GSE6691 sample 784	16/307	0.0317371	0.29586	0	0	1.67311	5.77267	MACF1;CASP8AP2;GGNBP2;AUTS2;ITPR1;PTPRK;SORL1;SETX;RABGEF1;SCAF8;ABLIM1;DNMBP;GNG7;PIEZO1;EIF3H;SGK1
prostate cancer DOID-10283 human GSE55945 sample 835	18/359	0.0330563	0.304771	0	0	1.60961	5.48803	EGR1;HSPA8;HSP90AB1;PPP1R12A;PDGFA;DSTN;IQGAP1;SORBS1;LITAF;RTN4;GJA1;ARPC2;PALLD;ST5;MALAT1;SGK1;ATF4;PAFAH1B1
Cushing Syndrome C0010481 human GSE4060 sample 1	15/284	0.0332703	0.303411	0	0	1.69557	5.77016	SRRM2;EGR1;GRAMD1B;IDH1;EEF2;PNRC1;GSTA4;SLCO2A1;SCAP;COX1;MALAT1;SGK1;YWHAG;TNS1;ATF4
chronic lymphocytic leukemia DOID-1040 human GSE6691 sample 786	15/285	0.034156	0.308138	0	0	1.68962	5.70553	CX3CR1;MACF1;SMAD3;IQSEC1;DSTN;PTPRK;SORL1;ZMIZ1;GNG7;ANXA6;PIEZO1;EIF3H;SGK1;TNS3;MAP4K4
Heart Injury C0018805 mouse GSE4710 sample 75	17/336	0.0349398	0.311857	0	0	1.62425	5.44793	FHOD3;HSPA8;HSP90AA1;HSP90AB1;HSPB8;TIMM23;SORBS1;HSPE1;COX5A;ACACB;NUDT3;HSPD1;TTN;ABLIM1;MYO18A;ALPK3;TNS1
diffuse large B-cell lymphoma DOID-0050745 mouse GSE6136 sample 684	21/440	0.0358694	0.316783	0	0	1.53218	5.09888	TGIF1;EGR1;HSPA8;HSP90AA1;HSP90AB1;ERDR1;RPSA;IQGAP1;EEF2;HSPE1;SORL1;COX5A;YWHAZ;PNRC1;RTN4;HSPD1;ABLIM1;ARHGEF3;EIF3H;ANP32B;PAIP2
Rift Valley fever DOID-1328 mouse GSE18064 sample 875	18/363	0.0362403	0.316725	0	0	1.59187	5.28117	SRRM2;TGIF1;HSPA8;HSP90AB1;TSC22D1;WTAP;LARP4B;EEF2;LITAF;FAM129B;HSPD1;AKAP12;SGK1;BCAT1;TNS3;YWHAG;EIF3A;ATF4
Pseudomonas Infection C0033817 human GSE923 sample 170	13/239	0.0372264	0.321989	0	0	1.74617	5.7462	HSP90AA1;AHNAK;IDH1;RPSA;IQGAP1;PTPRK;EEF2;HSPE1;ETV5;SEPT9;EIF3H;ANP32B;MCM2
Gamma-hydroxybutyric acidaemia C0268631 mouse GSE2866 sample 409	12/216	0.0385914	0.330389	0	0	1.78348	5.80476	EEF1A1;EGR1;HSPA8;HSP90AA1;HSP90AB1;ERDR1;ARPC2;ITPR1;SGK1;YWHAZ;RTN4;HSPD1
Sepsis C0243026 mouse GSE4479 sample 150	16/316	0.0396584	0.336095	0	0	1.62545	5.24608	CDK17;MACF1;EGR1;HSPA8;ERDR1;GT(ROSA)26SOR;TESC;TSPAN32;HSPD1;EEF1A1;SEPT9;PPM1B;SP3;ARFIP1;PAIP2;SPTAN1
multiple sclerosis DOID-2377 human GSE38010 sample 738	15/291	0.039833	0.334199	0	0	1.65478	5.33345	CX3CR1;SPARC;HSP90AB1;TTYH2;SLC44A1;HSPB8;ENO1;FGF1;LITAF;PNRC1;EEF1A1;ANP32B;SGK1;RAPGEF5;MAP4K4
Uterine leiomyoma C0042133 human GSE2725 sample 399	17/342	0.040206	0.333988	0	0	1.59575	5.12832	HSP90AB1;TSC22D1;AHNAK;VWF;LITAF;SORL1;GJA1;ABLIM1;SLCO2A1;REV3L;ARHGEF3;PECAM1;ANP32B;SGK1;TNS3;JAM2;TNS1
mytonic dystrophy Type 1 DOID-11722 human GSE7179 sample 1049	16/317	0.0406191	0.334112	0	0	1.62033	5.19074	DARS;HSPA8;HSP90AA1;HSP90AB1;IDH1;NOSIP;ENO1;EEF2;HSPD1;SCAF8;NASP;KIT;MALAT1;ANP32B;JARID2;MCM2
Duchenne muscular dystrophy (DMD) C0013264 mouse GSE1008 sample 298	14/267	0.0408189	0.332495	0	0	1.68329	5.38419	HSPA8;HSP90AB1;ERDR1;TPM3;CUL3;HSPE1;RTN4;HSPD1;EEF1A1;RCAN1;NCOR1;PHKG1;DYM;YWHAG
Peripheral motor neuropathy C0235025 mouse GSE1947 sample 104	17/344	0.0420826	0.339493	0	0	1.58647	5.02614	AHNAK;IDH1;CLTC;FN1;PDGFA;DSTN;ELOVL6;FGF1;RTN4;EPN1;FGF4;STRN3;SPTLC2;ARPC2;PRX;TAB2;ATF4
Down syndrome DOID-14250 human GSE16677 sample 1064	12/219	0.0421375	0.336699	0	0	1.75905	5.5706	SCAF8;ABLIM1;PFKFB3;ARPC2;WAC;MYH9;CDC5L;EIF3H;RICTOR;IGF2BP2;CDYL2;ATF4
Rett Syndrome C0035372 human GSE6955 sample 390	12/219	0.0421375	0.333523	0	0	1.75905	5.5706	NSF;EEF1A1;HSPA8;HSP90AA1;TSC22D1;ARPC2;ST5;SLC2A3;ACTN4;SYN1;RTN4;HSPD1
Huntington's disease DOID-12858 mouse GSE26001 sample 719	16/319	0.0425906	0.333958	0	0	1.61017	5.08189	FHOD3;EPHA4;SNAP47;PLEKHG1;SPARC;TSACC;ST8SIA1;UBXN2A;DNMT3A;SLC39A11;TEX14;NMNAT2;SETX;ARVCF;PECAM1;MORC1
systemic lupus erythematosus DOID-9074 mouse GSE2376 sample 633	14/269	0.0429929	0.333991	0	0	1.67077	5.25746	HSPA8;HSP90AA1;SGMS1;IQGAP1;FOXN2;HSPE1;PNRC1;SRPK1;HSPD1;AGO2;SP3;MALAT1;SGK1;ATF4
Adenoma C0001430 human GSE8514 sample 294	18/371	0.0432742	0.333092	0	0	1.55754	4.891	EGR1;HSP90AA1;SPARC;HSP90AB1;IDH1;DSTN;ACTN4;EEF2;PNRC1;EEF1A1;GJA1;ABLIM1;DEPTOR;RAB31;GSTA4;SGK1;PAIP2;CTNNAL1
colon adenoma DOID-0050912 mouse GSE422 sample 650	10/173	0.0447477	0.341303	0	0	1.85565	5.76497	UBL3;ERDR1;ARPC2;DSTN;SHROOM3;IGF2BP2;SGK1;EPN1;SRSF11;HSPD1
Duchenne muscular dystrophy (DMD) C0013264 mouse GSE1472 sample 410	14/271	0.0452474	0.342005	0	0	1.65844	5.13389	ERDR1;TPM3;TIMM23;HSPE1;MAPK14;EPN1;EEF1A1;RCAN1;PPM1A;UBE2R2;PHKG1;RPS6KA2;SMYD1;ATF4
cystic fibrosis DOID-1485 human GSE15568 sample 833	16/322	0.0456747	0.342152	0	0	1.59517	4.92302	AHCYL2;TSC22D1;AHNAK;IDH1;FN1;DSTN;RPSA;EEF2;COX5A;SORL1;RTN4;EEF1A1;DNMBP;FAT1;TACC1;IGF2BP2
Simian Acquired Immune Deficiency Syndrome C0080151 human GSE4785 sample 92	13/247	0.0463518	0.344152	0	0	1.68962	5.18965	DARS;PFKFB3;RPSA;ENO1;EEF2;PNRC1;EEF1A1;LASP1;ABLIM1;TRIM28;EIF3H;ANP32B;CTNNAL1
Hepatocellular carcinoma DOID-684 human GSE10393 sample 493	15/298	0.0472751	0.347928	0	0	1.61591	4.93139	HSPA8;HSP90AA1;FN1;NOSIP;ENO1;TYMS;EEF2;HSPE1;RTN4;HSPD1;ENAH;EEF1A1;GJA1;LASP1;SGK1
Gamma-hydroxybutyric acidaemia C0268631 mouse GSE2866 sample 311	14/273	0.0475837	0.347154	0	0	1.64629	5.0134	HSPA8;SPARC;TSC22D1;CLTC;EEF2;NUDT3;RTN4;PCDHGA10;NCOR2;GJA1;TRIM28;CAPZB;AGO2;SGK1
Breast Cancer C0006142 human GSE2429 sample 148	16/324	0.0478168	0.345847	0	0	1.58532	4.81997	EGR1;NTRK2;HSP90AB1;TSC22D1;AHNAK;AUTS2;IDH1;ITPR1;DSTN;RPSA;ACTN4;EEF2;SORL1;EEF1A1;TRIM28;MXI1
Androgen insensitivity syndrome C0039585 human GSE3871 sample 415	16/327	0.0511614	0.366875	0	0	1.57078	4.66956	EPHA4;NTRK2;AUTS2;UHRF1;DENND2A;EBF1;ATP2B4;IFT80;ELL2;SYN1;ARHGAP23;AKAP12;RPS6KA2;REV3L;EPC2;TACC2
type 2 diabetes mellitus DOID-9352 human GSE13760 sample 882	18/380	0.0523068	0.37191	0	0	1.52066	4.48689	EGR1;HSPA8;HSP90AA1;TSC22D1;HSPB8;FN1;IQGAP1;YWHAZ;HSPD1;EPS8;ENAH;LASP1;CRTAC1;PALLD;PDGFC;MXI1;TNS3;RAI14
Huntington's disease DOID-12858 mouse GSE3248 sample 726	12/228	0.0541226	0.381587	0	0	1.68962	4.92777	PCDHGA10;NSF;TIAM1;ABLIM1;TSPAN9;KIT;ANXA6;DAB2IP;ITPR1;JARID2;SPTAN1;RTN4
prostate cancer DOID-10283 human GSE3325 sample 990	15/304	0.05439	0.380277	0	0	1.58402	4.61198	HSPA8;HSP90AA1;SPARC;HSP90AB1;PPP1R12A;HSPB8;DSTN;RTN4;PNRC1;GJA1;PALLD;COX1;MALAT1;ANP32B;SGK1
Retinal damage C0235272 rat GSE1001 sample 312	14/279	0.0550941	0.382016	0	0	1.61089	4.66951	EGR1;MAP2K1;HSP90AA1;HSP90AB1;IQSEC1;RPSA;EEF2;HSPD1;EEF1A1;RIMS1;APBB2;SGK1;SPTAN1;YWHAG
Obesity C0028754 human GSE474 sample 236	12/229	0.0555828	0.382245	0	0	1.68224	4.86147	FHOD3;EEF1A1;HSPA8;ABLIM1;PFKFB3;TRIM28;TPM3;HSPB8;FN1;ANP32B;ATF4;TTN
Gamma-hydroxybutyric acidaemia C0268631 mouse GSE2866 sample 205	15/308	0.0595246	0.406026	0	0	1.56344	4.41105	NSF;SNAP47;HSP90AA1;HSP90AB1;DAB2IP;EEF2;YWHAZ;PCDHGA10;TRIM28;TSPAN9;SYT11;ANXA6;SGK1;SPTAN1;YWHAG
Depression 1596 human GSE12654 sample 462	15/309	0.0608581	0.411774	0	0	1.55838	4.36225	SRRM2;NSF;MAP2K1;HSP90AB1;FNBP1;NMNAT2;SORL1;PCDHGA9;HSPD1;SEPT9;DPP6;GSTA4;ST5;ANXA6;ANP32B
Schizophrenia C0036341 human GSE4036 sample 357	15/309	0.0608581	0.40848	0	0	1.55838	4.36225	HSPA8;SPARC;CLTC;DSTN;COX5A;SORL1;RTN4;EEF1A1;RABGEF1;RIMS1;SYT11;EIF3H;PAIP2;TNS3;SH3GL2
breast cancer DOID-1612 human GSE3744 sample 978	20/443	0.0633307	0.421702	0	0	1.44933	3.99927	FHOD3;NTRK2;EGR1;TCF7L1;MAML2;TESC;TSHZ2;EBF1;PDGFA;LIFR;FGF1;IL17RD;PTPN14;MID1;PCDHGA9;RCAN1;ST5;KIT;MXI1;JAM2
familial hypercholesterolemia DOID-13810 human GSE6054 sample 909	14/285	0.0633783	0.418696	0	0	1.57698	4.3503	HSPA8;LYPLA1;HSP90AA1;HSP90AB1;IQGAP1;LITAF;YWHAZ;NUDT3;PNRC1;EEF1A1;ARPC2;ARHGEF3;COX1;ANP32B
Type 2 diabetes mellitus C0011860 rat GSE3068 sample 335	14/285	0.0633783	0.415425	0	0	1.57698	4.3503	SPARC;ACSL6;TIMM23;ENO1;EEF2;HSPE1;MAPK14;COX5A;HSPD1;PHKG1;DNAJA2;COX1;YWHAG;TNFRSF21
Macular degeneration C0024437 human GSE1719 sample 46	16/337	0.063484	0.412892	0	0	1.52417	4.20207	SRRM2;MACF1;AHNAK;FN1;DSTN;ACTN4;EEF2;MID1;SYN1;RTN4;NDST1;PALLD;FAT1;MYH9;ANP32B;SPTAN1
ovarian cancer DOID-2394 human GSE14407 sample 611	17/364	0.0644135	0.415715	0	0	1.4993	4.11174	HSPA8;RBPJ;EEF2;RTN4;EEF1A1;GJA1;UBL3;RAB31;KCNT2;STK24;PDGFC;ARHGEF3;EIF3H;COX1;MALAT1;SGK1;CTNNAL1
Uterine leiomyoma C0042133 human GSE2724 sample 225	16/338	0.0648181	0.415133	0	0	1.51966	4.15804	EGR1;TSC22D1;AHNAK;DSTN;ACTN4;PCDHGA9;EEF1A1;GJA1;ABLIM1;REV3L;MYH9;ANP32B;SGK1;TNS3;SPTAN1;TNS1
Neurogenic Muscular Atrophy C0270948 rat GSE2566 sample 396	18/392	0.0663108	0.421476	0	0	1.4741	3.99984	HSPA8;LYPLA1;HSP90AA1;SPARC;AHNAK;TSC22D1;CLTC;ACSL6;ENO1;MSI2;COX5A;RTN4;TTN;STRN3;EEF1A1;RCAN1;EIF3H;TACC2
Nephroblastoma C0027708 human GSE2712 sample 418	19/419	0.0666723	0.420587	0	0	1.45573	3.94207	HSPA8;SPARC;TSC22D1;IDH1;CLTC;FN1;DSTN;ACTN4;LITAF;TBX3;RTN4;HSPD1;AKAP12;GSTA4;FAT1;ARHGEF3;TNS3;ATF4;RAI14
Asthma, allergic C0155877 mouse GSE2276 sample 348	13/262	0.0674258	0.422166	0	0	1.59288	4.29557	MACF1;TSC22D1;AHNAK;SHROOM3;FGF1;EEF1A1;UBL3;PRX;QK;MAPT;JARID2;PAIP2;SPTAN1
Retinitis Pigmentosa C0035334 mouse GSE128 sample 33	13/262	0.0674258	0.419039	0	0	1.59288	4.29557	RANBP3;ERDR1;CHD8;FN1;TIMM23;EEF2;SPPL3;YWHAZ;EPN1;TSPAN9;RPS6KA2;MAPT;YWHAG
Infantile neuronal ceroid lipofuscinosis C0268281 mouse GSE6678 sample 141	13/262	0.0674258	0.415957	0	0	1.59288	4.29557	CDK17;NSF;RAP1GAP2;SNAP47;MAP2K1;HSP90AA1;ERDR1;DSTN;MID1;SYN1;RIMS1;SGK1;SPTAN1
MS (Multiple Sclerosis) C0026769 mouse GSE842 sample 381	16/340	0.067543	0.413639	0	0	1.51072	4.07137	NSF;HSPA8;SNAP47;SPARC;HSP90AB1;FGF1;EEF2;YWHAZ;GJA1;UBL3;SYT11;QK;MAPT;TBL1X;SH3GL2;YWHAG
Bipolar Disorder C0005586 human GSE5388 sample 107	16/341	0.0689338	0.419098	0	0	1.50629	4.02873	NSF;CX3CR1;EGR1;HSPA8;HSP90AA1;TSC22D1;EEF2;SORL1;NUDT3;ETV5;GJA1;SYT11;MXI1;ANXA6;MAPT;ATF4
psoriasis DOID-8893 human GSE26952 sample 982	15/315	0.0692858	0.418207	0	0	1.5287	4.08089	GSK3B;LYPLA1;HSP90AA1;POU2F1;TSC22D1;FNBP1;ARHGAP17;FAM129B;GATAD2A;TBL1XR1;AGO2;SIK3;ULK1;SPTAN1;SRSF11
Idiosyncratic drug effect C0277580 rat GSE2825 sample 304	14/289	0.0693426	0.415561	0	0	1.55515	4.15022	EGR1;LYPLA1;CDCA3;ANP32A;TSC22D1;ARL15;PNRC1;PTPRG;SIK3;FAT1;TAB2;TBL1X;PGPEP1;RREB1
Huntington's disease DOID-12858 human GSE1751 sample 795	11/213	0.070394	0.41887	0	0	1.65789	4.39945	CCND3;LASP1;SPARC;TNIP1;FNBP1;KAT6A;ENO1;JARID2;EEF2;SORL1;GATAD2A
Huntington's disease DOID-12858 mouse GSE26001 sample 720	9/164	0.071415	0.421952	0	0	1.76174	4.64966	FHOD3;ZFP704;ZMAT4;ESRRB;TET2;CELSR1;KANK4;AKAP2;TBX3
testis seminoma DOID-5842 human GSE8607 sample 622	16/343	0.0717729	0.421101	0	0	1.4975	3.9448	TLE4;HSP90AA1;SPARC;TSC22D1;CUL1;BAZ2B;PIAS2;RTN4;COIL;EEF1A1;SEPT9;ARPC2;PALLD;ST5;TRIP12;SOX5
Type 1 diabetes mellitus C0011854 mouse GSE4616 sample 363	16/343	0.0717729	0.418177	0	0	1.4975	3.9448	HSPA8;HSP90AA1;SPARC;HSP90AB1;ERDR1;HSPB8;TIMM23;HSPE1;YWHAZ;HSPD1;GJA1;ARPC2;ANXA6;SMYD1;MYH9;YWHAG
Huntington's disease DOID-12858 mouse GSE3621 sample 703	17/371	0.0738462	0.427289	0	0	1.47101	3.83313	CDK17;NSF;RAP1GAP2;EGR1;MAP2K1;SPARC;ERDR1;TSC22D1;CLTC;ITPR1;RPSA;SYN1;RTN4;GJA1;UBL3;GNG7;ERC2
Type 1 diabetes mellitus C0011854 mouse GSE1623 sample 53	17/371	0.0738462	0.424363	0	0	1.47101	3.83313	ANKRD28;DDC;SPARC;CTBP2;TSC22D1;EED;GALNT2;PAWR;LARP4B;HSPE1;STRN3;NCOR2;ATXN2;TFDP1;SP3;REV3L;TOP1
CML - Chronic myeloid leukemia C0023473 human GSE11889 sample 403	13/266	0.0739634	0.422145	0	0	1.56893	4.08579	TGIF1;EGR1;HSP90AA1;PFKFB3;TSC22D1;SORL1;SEPT9;PDGFC;KIT;EIF3H;IGF2BP2;JARID2;EIF3A
Papillary Carcinoma of the Thyroid C0238463 human GSE3678 sample 306	14/292	0.0740517	0.419793	0	0	1.53917	4.00645	EGR1;DSTN;LIFR;AKAP12;RCAN1;GJA1;DEPTOR;KIT;SLCO2A1;FAT1;TRIM16;DENND6A;SGK1;ATF4
Senescence C0001792 rat GSE3531 sample 167	14/292	0.0740517	0.416976	0	0	1.53917	4.00645	CDK17;EGR1;HSP90AA1;HSP90AB1;TESC;HSPE1;COX5A;YWHAZ;HSPD1;DNAJA2;COX1;PIGL;SRSF11;YWHAG
Adenocarcinoma of lung C0152013 human GSE1987 sample 431	15/319	0.0753162	0.421269	0	0	1.50953	3.90374	MACF1;SPARC;AHNAK;VWF;TPM3;FN1;SLC2A3;IQGAP1;LITAF;RTN4;TTN;ARPC2;PALLD;PECAM1;TACC1
nasopharynx carcinoma DOID-9261 human GSE13597 sample 808	12/242	0.0770003	0.427836	0	0	1.59187	4.08147	EEF1A1;HSPA8;SEPT9;CCND3;HSP90AA1;HSP90AB1;AHNAK;ANXA6;DSTN;RPSA;ARHGAP17;DDX60
rheumatoid arthritis DOID-7148 human GSE15573 sample 904	15/321	0.0784567	0.43306	0	0	1.50013	3.81814	HSPA8;FNBP1;TPM3;TESC;EEF2;LITAF;COX5A;CRKL;SEPT9;CCND3;LASP1;ARHGEF3;SCAP;TACC1;ANP32B
Endometriosis C0014175 human GSE7305 sample 149	13/270	0.0808986	0.443621	0	0	1.54569	3.88672	SPARC;PFKFB3;TSC22D1;RPSA;ACTN4;EEF2;EEF1A1;GJA1;REV3L;COX1;RHPN2;YWHAG;TNFRSF21
autism spectrum disorder DOID-0060041 human GSE25507 sample 1024	12/247	0.0864683	0.471084	0	0	1.55965	3.81798	EEF1A1;GLT1D1;LASP1;SPARC;RAB31;IQSEC1;PECAM1;COX1;JARID2;LITAF;YWHAZ;SORL1
endometrial cancer DOID-1380 human GSE17025 sample 847	17/380	0.0872672	0.472369	0	0	1.43617	3.50252	TCERG1;EGR1;SPARC;PFKFB3;TSC22D1;RPSA;EEF2;EEF1A1;GJA1;SLTM;PALLD;EIF3H;ANP32B;DENND6A;SGK1;SRSF11;ATF4
Cerebral Infarction C0007785 mouse GSE63 sample 262	18/408	0.0886724	0.476898	0	0	1.4163	3.43141	NSF;MACF1;SPARC;ITPR1;ANK3;EEF2;SPPL3;YWHAZ;NUDT3;ARHGAP35;EPN1;PCDHGA10;ARPC2;TRIM28;SYT11;SPTAN1;RNF220;PAFAH1B1
esophagus squamous cell carcinoma DOID-3748 human GSE63941 sample 658	18/408	0.0886724	0.473861	0	0	1.4163	3.43141	CEMIP;SPARC;FN1;DSTN;PTPRK;RBPJ;ELL2;RTN4;EPS8;EXT1;LASP1;PALLD;FAT1;MALAT1;SGK1;TNS3;MAP4K3;RAI14
Breast Cancer DOID-1612 human GSE34925 sample 478	17/382	0.0904502	0.480302	0	0	1.42866	3.433	RAP1GAP2;EGR1;WWC1;SHROOM3;ANK2;IRAK3;ANK3;SORBS1;RBPJ;FGF1;RIMS1;GJA1;UBL3;TNIP1;FUT9;MAPT;PAIP2
ductal carcinoma in situ DOID-0060074 human GSE21422 sample 605	14/303	0.0930757	0.491135	0	0	1.48329	3.52185	EGR1;PFKFB3;HSP90AB1;VWF;EBF1;SORBS1;EEF2;ACACB;RTN4;EPS8;EEF1A1;KIT;YWHAG;TNS1
Escherichia coli infection of the central nervous system C1320188 mouse GSE3253 sample 341	11/225	0.0945615	0.495857	0	0	1.56947	3.70159	SRRM2;EGR1;HSPA8;HSP90AA1;HSP90AB1;PPP2R2C;AGO2;ITPR1;PKP4;MALAT1;RTN4
HIV - Human immunodeficiency virus infection C0019693 human GSE2171 sample 40	11/226	0.0967759	0.504317	0	0	1.56252	3.64905	HSPA8;HSP90AA1;SPARC;PFKFB3;HSP90AB1;PECAM1;SLC2A3;SGK1;EEF2;HSPE1;HSPD1
Primary open angle glaucoma C0339573 human GSE4316 sample 284	11/227	0.0990211	0.512831	0	0	1.55564	3.59729	GJA1;LASP1;HSP90AA1;SPARC;ARPC2;FN1;RPSA;EEF2;TNS3;CTNNAL1;RTN4
systemic lupus erythematosus DOID-9074 human GSE55447 sample 1076	15/334	0.100932	0.51952	0	0	1.44174	3.30636	YES1;HIP1;SMAD3;KDM4C;TESC;PTPRJ;NAV1;SIPA1L3;RELB;PCDHGA9;RIMS2;NCOA7;ACSS1;JAM2;DLGAP4
Adenocarcinoma of esophagus C0279628 human GSE1420 sample 164	13/282	0.104117	0.532648	0	0	1.47991	3.34792	AHNAK;FNBP1;HSPB8;DSTN;EEF2;GJA1;ABLIM1;GSTA4;ARPC2;PALLD;MXI1;TRIM16;ATF4
diffuse large B-cell lymphoma DOID-0050745 mouse GSE6136 sample 688	15/337	0.106629	0.542193	0	0	1.4289	3.19846	HSPA8;HSP90AA1;HSP90AB1;ERDR1;CELF1;CLTC;TIMM23;HSPE1;COX5A;HSPD1;CFDP1;TFDP1;ARPC2;ANP32B;TOP1
Crohn's disease DOID-8778 human GSE3365 sample 794	15/339	0.110534	0.558661	0	0	1.42047	3.1285	CX3CR1;HSPA8;HSP90AA1;GGNBP2;HSP90AB1;AHNAK;SORL1;EEF1A1;CCND3;SLTM;ARPC2;MXI1;ANXA6;PIEZO1;ATF4
Nemaline Myopathy C0206157 mouse GSE3384 sample 180	9/181	0.113375	0.569592	0	0	1.59627	3.47516	ANKRD28;ERDR1;UBE2R2;TAB2;ARIH1;NUDT3;RTN4;STRN3;HSPD1
Zaire ebolavirus DOID-4325 human GSE31747 sample 497	13/287	0.114861	0.573623	0	0	1.45413	3.14678	SPARC;AHNAK;FN1;DSTN;ENO1;RTN4;HSPD1;EPS8;EEF1A1;LASP1;RAB31;CAPZB;ST5
Alexander Disease C0270726 mouse GSE977 sample 87	14/314	0.114889	0.570365	0	0	1.43133	3.0971	NSF;MAP2K1;HSP90AA1;ANP32A;ERDR1;TSC22D1;CLTC;YWHAZ;EPN1;PCDHGA10;UBL3;TSPAN9;MAPT;YWHAG
AML - Acute myeloid leukemia C0023467 human GSE2191 sample 112	12/261	0.116664	0.575773	0	0	1.47599	3.17109	SEPT9;CCND3;RAB31;TSC22D1;STK24;LUZP1;CCDC57;MXI1;TSPAN5;MYH9;SLC2A3;LITAF
Epilepsy DOID-1826 rat GSE2880 sample 804	17/397	0.116671	0.572438	0	0	1.37468	2.95335	SRRM2;HSP90AB1;TTYH2;IQSEC1;CLTC;FOXJ3;PCDHGA1;ACSL6;ENO1;EEF2;LITAF;TBCE;TACC1;MAPT;SGK1;SPTAN1;ATF4
prostate cancer DOID-10283 human GSE3325 sample 991	14/315	0.11701	0.570763	0	0	1.42679	3.06117	EGR1;HSPA8;HSP90AB1;IDH1;RAB27A;DSTN;SORBS1;SORL1;RTN4;PNRC1;GJA1;PALLD;PDGFC;TNS1
Dehydration C0011175 rat GSE4130 sample 23	16/370	0.117749	0.571047	0	0	1.38823	2.9697	RAP1GAP2;EGR1;HSPA8;HSP90AB1;PCDHGA1;RAB27A;TIMM23;DSTN;EEF2;GSTA4;DNAJA2;COX1;PAIP2;SPTAN1;YWHAG;ATF4
Bacterial Infection C0004623 human GSE4748 sample 414	14/316	0.119154	0.57454	0	0	1.42227	3.02566	HSP90AA1;IQGAP1;COX5A;RTN4;PNRC1;TIAM1;UBL3;RAB31;STK24;PALLD;EIF3H;COX1;MALAT1;PAIP2
Huntington's disease DOID-12858 mouse GSE3621 sample 702	13/289	0.119334	0.572121	0	0	1.44407	3.06984	CDK17;NSF;RAP1GAP2;EGR1;SNAP47;MAP2K1;SPARC;ITPR1;RPSA;YWHAZ;RTN4;GJA1;ERC2
familial hypercholesterolemia DOID-13810 human GSE6088 sample 908	14/317	0.121321	0.57834	0	0	1.41779	2.99056	CX3CR1;HSPA8;HSP90AA1;HSP90AB1;ANP32A;LITAF;YWHAZ;PNRC1;EEF1A1;ARPC2;MALAT1;ANP32B;SRSF11;ATF4
Down syndrome DOID-14250 mouse GSE39159 sample 529	5/84	0.121359	0.575253	0	0	1.91088	4.03005	METTL23;EGR1;TESC;ROR2;SGK1
Dehydration C0011175 rat GSE3110 sample 443	12/263	0.121418	0.572304	0	0	1.46476	3.08847	SRRM2;EEF1A1;GJA1;ALDH1L1;HSP90AB1;TSC22D1;AHNAK;VWF;FN1;FAT1;RPSA;PGPEP1
systemic lupus erythematosus DOID-9074 human GSE10325 sample 691	10/210	0.121657	0.570227	0	0	1.5287	3.22028	EEF1A1;CX3CR1;HSPA8;SEPT9;AHNAK;TESC;PECAM1;EIF3H;RPSA;EEF2
testis seminoma DOID-5842 human GSE8607 sample 623	15/345	0.122756	0.572181	0	0	1.39577	2.9277	TLE4;HSP90AA1;SPARC;TSC22D1;CUL1;HIPK1;PIAS2;RTN4;COIL;SEPT9;ARPC2;PALLD;AGPS;TRIP12;SOX5
Epilepsy C0014544 human GSE7486 sample 417	17/401	0.124362	0.576464	0	0	1.36096	2.837	DARS;HSP90AA1;SGMS1;UHRF1;TYMS;DDX60;HSPE1;LITAF;COX5A;YWHAZ;STK24;ARPC2;EIF3H;BIRC6;ANP32B;YWHAG;ATF4
Arthropathy C0022408 human GSE10575 sample 271	17/401	0.124362	0.573297	0	0	1.36096	2.837	DARS;PFKFB3;UHRF1;GALNT2;ENO1;ACTN4;FGF1;TYMS;ELL2;EPS8;LASP1;CCPG1;FAT1;REV3L;MYH9;ANP32B;ATF4
Huntington's disease DOID-12858 human GSE24250 sample 671	13/293	0.128576	0.589484	0	0	1.42435	2.92168	HSP90AB1;NOSIP;RPSA;EEF2;LITAF;EEF1A1;SEPT9;CCND3;ABLIM1;MYH9;EIF3H;ANP32B;ATF4
Protozoan Infection C0033740 human GSE2077 sample 239	12/266	0.128753	0.587084	0	0	1.44824	2.9687	DARS;TRIM28;AHNAK;STK24;TNIP1;ST5;IDH1;PIEZO1;ENO1;PTPRK;EEF2;ATF4
familial combined hyperlipidemia DOID-13809 human GSE11393 sample 773	14/321	0.130214	0.59054	0	0	1.40012	2.85425	RAP1GAP2;TGIF1;EGR1;IQSEC1;LIMK2;JMJD1C;SLC2A3;CHD2;LITAF;ADAM19;RABGEF1;ANXA6;SGK1;PTGES
hepatitis C DOID-1883 human GSE20948 sample 601	13/294	0.130948	0.590676	0	0	1.41951	2.88579	HSPA8;HSP90AA1;PFKFB3;HSP90AB1;IDH1;FN1;ACTN4;EEF2;HSPE1;HSPD1;GJA1;COX1;TNFRSF21
Scleroderma C0011644 human GSE1724 sample 155	9/189	0.137	0.61467	0	0	1.5287	3.03871	EEF1A1;SEPT9;GJA1;TSC22D1;WTAP;TNIP1;ST5;MYH9;EEF2
nasopharynx carcinoma DOID-9261 human GSE13597 sample 613	13/297	0.13821	0.6168	0	0	1.40517	2.7808	HSPA8;HSP90AB1;DSTN;RPSA;ARHGAP17;DDX60;EEF2;RTN4;SEPT9;CCND3;ANXA6;ARHGEF3;ATF4
schizophrenia DOID-5419 human GSE12679 sample 768	10/216	0.13853	0.614954	0	0	1.48624	2.9378	RAP1GAP2;HSPA8;HSP90AA1;KCNT2;TSACC;FAM189A1;MALAT1;BIRC6;ERC2;ATF4
Chronic phase chronic myelogenous leukemia DOID-8552 human GSE5550 sample 456	12/270	0.138906	0.61338	0	0	1.42679	2.81642	SRRM2;AKAP12;EEF1A1;MACF1;EGR1;RCAN1;GSK3B;SEPT9;SPARC;SH3BP4;CDK13;SORL1
Carcinoma in situ of small intestine C0686083 mouse GSE422 sample 119	9/192	0.146469	0.643392	0	0	1.50482	2.89066	ATXN2;CREBBP;UBL3;ERDR1;SHROOM3;IGF2BP2;SGK1;EPN1;SRSF11
Ulcerative Colitis C0009324 human GSE3365 sample 188	14/328	0.14664	0.640786	0	0	1.37024	2.63055	CX3CR1;TCERG1;HSPA8;HSP90AA1;GGNBP2;HSP90AB1;AHNAK;EEF1A1;SLTM;ARPC2;MXI1;PIEZO1;ANP32B;ATF4
myelodysplastic syndrome DOID-0050908 human GSE19429 sample 748	12/273	0.146797	0.638151	0	0	1.41111	2.7075	AKAP12;EEF1A1;SEPT9;HSP90AB1;UHRF1;EBF1;MALAT1;MDM4;ENO1;SGK1;TYMS;PAIP2
systemic lupus erythematosus DOID-9074 human GSE55447 sample 1077	14/329	0.149075	0.644709	0	0	1.36607	2.60006	TLE4;PHC1;TENM3;TENM4;AGK;SYN1;PCDHGA9;RIMS2;RABGEF1;TRIM28;IRAK2;PAPD5;SH3BP4;PGPEP1L
schizophrenia DOID-5419 human GSE25673 sample 891	12/274	0.14948	0.643146	0	0	1.40596	2.67216	GUCY1A2;ALDH1L1;DPP6;KCNJ6;RAB31;PFKFB3;TTYH2;FUT9;ARHGEF3;GRIK4;SH3GL2;TNS1
Parkinson's disease DOID-14330 human GSE19587 sample 741	18/442	0.150748	0.645296	0	0	1.30735	2.47369	VWF;FNBP1;HSPB8;CLTC;RPSA;ANK2;ENO1;ACTN4;FGF1;EEF2;PCDHGA9;SEPT9;SYT11;EIF3H;ANP32B;SGK1;SPTAN1;FRYL
Familial combined hyperlipidaemia C0020474 human GSE11393 sample 267	13/302	0.150793	0.64221	0	0	1.38191	2.61435	RAP1GAP2;EPHA4;YES1;ANP32A;AUTS2;USP10;LIMK2;ATP2B4;JMJD1C;SLC2A3;FRMD4B;CHD2;LITAF
testis seminoma DOID-5842 human GSE8607 sample 624	17/414	0.15136	0.641368	0	0	1.31823	2.48894	TLE4;HSP90AA1;SPARC;TSC22D1;CUL1;BAZ2B;HIPK1;PIAS2;RTN4;COIL;SEPT9;ARPC2;PALLD;AGPS;PIP5K1B;TRIP12;SOX5
Spinal Muscular Atrophy, Infantile C0043116 mouse GSE3075 sample 126	8/168	0.154762	0.65249	0	0	1.5287	2.85235	NSF;MAP2K1;SPARC;CLTC;FGF1;EEF2;SGK1;RTN4
invasive ductal carcinoma DOID-3008 human GSE21422 sample 606	13/304	0.155991	0.654382	0	0	1.37281	2.55063	EGR1;SPARC;PFKFB3;VWF;EBF1;SORBS1;EEF2;RTN4;EEF1A1;GJA1;KIT;ANP32B;TNS1
Neurofibromatosis DOID-8712 mouse GSE1482 sample 669	13/305	0.158625	0.66212	0	0	1.36831	2.51936	HSPA8;SNAP47;SPARC;CLTC;DSTN;YWHAZ;RTN4;ARPC2;UBE2R2;XPNPEP1;TOP1;SPTAN1;YWHAG
esophagus adenocarcinoma DOID-4914 human GSE1420 sample 644	12/278	0.160463	0.666479	0	0	1.38573	2.53546	GJA1;ABLIM1;AHNAK;GSTA4;ARPC2;PALLD;HSPB8;MXI1;DSTN;TRIM16;EEF2;ATF4
APECED - Autoimmune polyendocrinopathy-candidiasis-ectodermal dystrophy C0085859 mouse GSE85 sample 6	14/334	0.16157	0.66777	0	0	1.34562	2.45282	SLC44A1;TSC22D1;AHNAK;FN1;TIMM23;DSTN;SHROOM3;LAMC2;HSPE1;YWHAZ;GJA1;ARPC2;TOP1;SGK1
Generalized seizures C0234533 mouse GSE6614 sample 169	12/279	0.163272	0.671495	0	0	1.38076	2.50241	PCDHGA10;NSF;HSP90AA1;SPARC;ERDR1;ITPR1;TAB2;ANK3;TOP1;EEF2;NUDT3;BRD4
esophagus squamous cell carcinoma DOID-3748 human GSE63941 sample 659	16/391	0.163347	0.668529	0	0	1.31367	2.3802	CEMIP;SPARC;FN1;PTPRK;RBPJ;RTN4;EXT1;GJA1;LASP1;PALLD;FAT1;MALAT1;SGK1;MAP4K3;YWHAG;RAI14
Rotavirus infection of children C1442797 human GSE2729 sample 43	13/307	0.163961	0.667782	0	0	1.3594	2.45797	CX3CR1;HSPA8;SPARC;ANP32A;AHNAK;EEF2;SORL1;EEF1A1;LASP1;ABLIM1;ARPC2;CAPZB;MYH9
hepatitis C DOID-1883 human GSE20948 sample 600	13/307	0.163961	0.664556	0	0	1.3594	2.45797	HSPA8;HSP90AA1;PFKFB3;DSTN;ACTN4;EEF2;HSPE1;RTN4;CAPZB;MYH9;SGK1;YWHAG;TNFRSF21
pancreatic cancer DOID-1793 human GSE18670 sample 483	11/253	0.167901	0.677253	0	0	1.39577	2.49059	ANKRD28;CX3CR1;TIAM1;UBL3;CRADD;MTMR12;PRKD3;KAT6B;ITPR1;TACC1;SGK1
lung cancer DOID-1324 mouse GSE14277 sample 615	15/365	0.168872	0.677911	0	0	1.31929	2.34651	MACF1;SPARC;AHNAK;VWF;STARD8;PDGFA;AKAP2;AKAP12;ST5;PRX;PECAM1;PAIP2;TNS3;SPTAN1;TNS1
Cardiomyopathy C0878544 human GSE5406 sample 88	13/309	0.169387	0.676743	0	0	1.3506	2.39808	MAP2K1;HSP90AA1;RCAN1;PALLD;SLCO2A1;MXI1;CDC37L1;NCAM1;SGK1;SOS1;SLC25A12;ATF4;BRD4
Bipolar Disorder C0005586 human GSE5389 sample 302	16/395	0.172966	0.687766	0	0	1.30036	2.28169	CX3CR1;NSF;HSPA8;GSK3B;MAP2K1;HSP90AA1;HSP90AB1;ITPR1;DSTN;ANK3;PTPRK;SORL1;COX5A;YWHAZ;RTN4;RAPGEF5
Pulmonary Hypertension C0020542 human GSE703 sample 241	8/173	0.173083	0.684982	0	0	1.48452	2.60383	EEF1A1;ABLIM1;SPARC;HSP90AB1;ANP32A;ANXA6;RPSA;HSPD1
ALS (Amyotrophic Lateral Sclerosis) C0002736 human GSE833 sample 283	11/255	0.173994	0.685356	0	0	1.38482	2.42169	EEF1A1;HSP90AA1;HSP90AB1;ANXA6;ENO1;RBPJ;RAPGEF5;EEF2;COX5A;PAFAH1B1;HSPD1
progressive myoclonus epilepsy DOID-891 mouse GSE47516 sample 518	14/339	0.174591	0.684496	0	0	1.32578	2.31389	FHOD3;CASP8AP2;GT(ROSA)26SOR;IFT80;ETV5;DPP6;ZZZ3;CCPG1;PDGFC;SP3;IGF2BP2;TRPM3;ZSWIM3;KDM6A
Acute Lung Injury C0242488 mouse GSE1871 sample 152	10/228	0.175698	0.685631	0	0	1.40801	2.44852	EEF1A1;MACF1;TSC22D1;VWF;STARD8;MYO18A;TACC2;PAIP2;TNS3;TNS1
myotonic dystrophy type 1 DOID-11722 human GSE7177 sample 1053	12/284	0.177681	0.690159	0	0	1.35645	2.34363	CEMIP;LASP1;PALLD;PDGFC;ANXA6;COX1;RPSA;SGK1;EEF2;TNS3;ATF4;RAI14
autism spectrum disorder DOID-0060041 human GSE25507 sample 1031	12/285	0.180634	0.698397	0	0	1.35169	2.31313	EEF1A1;HSPA8;SEPT9;ABLIM1;HSP90AB1;PCED1B;EIF3H;RPSA;ANP32B;SGK1;EEF2;SORL1
Senescence C0001792 rat GSE854 sample 161	13/314	0.18334	0.705608	0	0	1.32909	2.25469	EGR1;HSPA8;MAP2K1;HSP90AA1;TSC22D1;PCDHGA1;TIMM23;RPSA;ENO1;COX5A;HSPD1;XPNPEP1;RAF1
RA (rheumatoid arthritis) C0003873 human GSE1919 sample 110	13/314	0.18334	0.702386	0	0	1.32909	2.25469	EGR1;HSP90AA1;HSP90AB1;AHNAK;DSTN;SLC2A3;ACTN4;EEF2;HSPD1;MXI1;TACC1;ANP32B;ATF4
amyotrophic lateral sclerosis DOID-332 human GSE833 sample 1006	11/259	0.186493	0.711215	0	0	1.36344	2.28971	EEF1A1;HSP90AA1;HSP90AB1;ANXA6;ENO1;RBPJ;RAPGEF5;EEF2;COX5A;PAFAH1B1;HSPD1
Duchenne muscular dystrophy (DMD) C0013264 mouse GSE1026 sample 72	12/287	0.186611	0.708447	0	0	1.34227	2.25331	GJA1;DDC;ERDR1;AHNAK;PHKG1;TSPAN9;RPS6KA2;TIMM23;TAB2;RAF1;NUDT3;RTN4
pulmonary tuberculosis DOID-2957 mouse GSE48027 sample 831	3/48	0.187741	0.709525	0	0	2.00642	3.35612	EGR1;ERDR1;TBX3
silicosis DOID-10325 rat GSE29110 sample 983	11/260	0.189681	0.713641	0	0	1.35819	2.25788	EEF1A1;MACF1;SPARC;AHNAK;GSTA4;SLCO2A1;DSTN;COX1;TNS3;SPTAN1;TNS1
myelodysplastic syndrome DOID-0050908 human GSE19429 sample 750	13/317	0.191969	0.719027	0	0	1.31652	2.1728	UHRF1;EBF1;SLC2A3;TYMS;YWHAZ;SORL1;RTN4;AKAP12;EEF1A1;MALAT1;MDM4;DENND6A;PAIP2
Emery-Dreifuss muscular dystrophy DOID-11726 mouse GSE6399 sample 675	14/347	0.196471	0.732618	0	0	1.29521	2.10762	FHOD3;SPARC;TIMM23;EPN1;EEF1A1;CAPZB;MYO18A;ALPK3;QRICH1;TACC2;SGK1;PAIP2;SPTAN1;TNS1
breast cancer DOID-1612 human GSE26910 sample 602	15/376	0.197556	0.733405	0	0	1.28069	2.07694	VWF;HSPB8;DENND2A;EBF1;ANK2;LIFR;IL17RD;EPS8;STOX2;ABLIM1;KCNT2;REV3L;PECAM1;PKP4;JAM2
Down syndrome DOID-14250 human GSE19681 sample 1065	11/265	0.205985	0.761329	0	0	1.33257	2.10539	SCAF8;LASP1;HSP90AA1;PFKFB3;ARPC2;WAC;B3GNT2;MYH9;EIF3H;RICTOR;ATF4
systemic lupus erythematosus DOID-9074 human GSE61635 sample 816	12/294	0.208237	0.766277	0	0	1.31032	2.05599	FHOD3;CCND3;PLEKHG1;ATAD5;KANSL1;MXI1;TSPAN5;IGF2BP2;MCC;SORL1;TNFRSF21;TNS1
systemic lupus erythematosus (SLE) DOID-9074 human GSE36700 sample 512	12/294	0.208237	0.76293	0	0	1.31032	2.05599	EEF1A1;HSPA8;GJA1;CEMIP;HSP90AA1;SPARC;CRTAC1;DSTN;EIF3H;RPSA;EEF2;ATF4
prostate cancer DOID-10283 human GSE55945 sample 834	13/325	0.215872	0.787465	0	0	1.28411	1.96863	HSP90AA1;SPARC;RAB27A;DSTN;IQGAP1;SORBS1;LITAF;RTN4;GJA1;ARPC2;PALLD;ST5;ANXA6
muscular dystrophy DOID-9884 human GSE42806 sample 530	13/325	0.215872	0.784056	0	0	1.28411	1.96863	SPEN;EGR1;ALDH1L1;PFKFB3;HSP90AB1;AUTS2;VWF;KMT2C;CHD8;FBXO11;HSPD1;SCAF8;DLEU2
Duchenne muscular dystrophy (DMD) C0013264 mouse GSE466 sample 328	11/268	0.216048	0.781312	0	0	1.31765	2.01897	RCAN1;ERDR1;UBE2R2;PHKG1;TPM3;RPS6KA2;TIMM23;TAB2;MAPT;YWHAG;STRN3
amyotrophic lateral sclerosis DOID-332 human GSE833 sample 1007	8/184	0.21652	0.779657	0	0	1.39577	2.13563	EEF1A1;ATXN2;HSP90AA1;ENO1;RAPGEF5;SLC28A1;FGFR2;PAFAH1B1
Huntington's disease DOID-12858 mouse GSE3621 sample 704	14/356	0.222522	0.797844	0	0	1.26247	1.89715	CDK17;NSF;RAP1GAP2;EGR1;MAP2K1;SPARC;ITPR1;NUDT3;RTN4;RIMS1;GJA1;SGK1;ERC2;SH3GL2
Schizophrenia C0036341 human GSE12649 sample 261	10/242	0.224236	0.80057	0	0	1.32656	1.98328	AKAP12;GRAMD1B;HSPA8;HSP90AB1;ANXA6;TNS3;ETV5;ATF4;PAFAH1B1;HSPD1
familial hypercholesterolemia DOID-13810 human GSE6054 sample 910	12/300	0.227596	0.809123	0	0	1.28411	1.90072	HSPA8;HSP90AA1;RAB31;HSP90AB1;ARPC2;RPSA;ANP32B;LITAF;YWHAZ;SORL1;RTN4;PNRC1
systemic lupus erythematosus DOID-9074 human GSE13887 sample 450	10/243	0.227891	0.806753	0	0	1.3211	1.95376	EEF1A1;HSPA8;ABLIM1;HSP90AB1;TRIM28;ARHGEF3;DDX60;EEF2;ATF4;RNF220
ulcerative colitis DOID-8577 human GSE3365 sample 762	13/329	0.228282	0.804743	0	0	1.2685	1.87379	CX3CR1;TCERG1;HSPA8;HSP90AA1;GGNBP2;HSP90AB1;AHNAK;EEF1A1;SLTM;ARPC2;MXI1;PIEZO1;ATF4
Sarcoidosis C0036202 human GSE2657 sample 12	8/187	0.229032	0.804006	0	0	1.37338	2.02422	SRRM2;EEF1A1;CX3CR1;SEPT9;SART3;ANXA6;SPTAN1;SYN1
Granulomatous Disease, Chronic C0018203 human GSE935 sample 371	12/301	0.230892	0.807158	0	0	1.27984	1.876	ANKRD28;SPARC;AHNAK;AUTS2;VWF;AGO2;MXI1;RAPGEF1;JMJD1C;SGK1;RAPGEF5;ETV5
bipolar disorder DOID-3312 human GSE5392 sample 573	15/388	0.231253	0.805068	0	0	1.24108	1.81725	CDK17;HSPA8;MAP2K1;HSP90AA1;HSP90AB1;PCDHGA5;YWHAZ;RTN4;GJA1;LASP1;ZMIZ1;KIT;ARHGEF3;RAPGEF5;ERC2
Primary pulmonary hypoplasia C0456891 mouse GSE1363 sample 20	13/330	0.23143	0.802354	0	0	1.26465	1.85079	HSP90AA1;SPARC;HSP90AB1;AHNAK;LAMC2;YWHAZ;RTN4;HSPD1;EEF1A1;CCND3;TOP1;SGK1;ATF4
polycystic ovary syndrome DOID-11612 human GSE48301 sample 806	14/359	0.231518	0.799358	0	0	1.25192	1.83167	NSF;PLEKHG1;VWF;EBF1;FN1;SLC39A11;CISD2;ANK2;ENO1;CHEK1;SLCO2A1;PECAM1;SAE1;IFT46
endometrial cancer DOID-1380 human GSE17025 sample 848	11/273	0.233256	0.802058	0	0	1.29352	1.88286	EGR1;GJA1;TSC22D1;SLTM;PALLD;FAT1;REV3L;DSTN;IFT80;MALAT1;EEF2
Hypertension C0020538 rat GSE2739 sample 209	16/418	0.23351	0.799653	0	0	1.22881	1.78734	EGR1;DDC;IQSEC1;PCDHGA1;FN1;RPSA;ENO1;EEF2;LITAF;COX5A;YWHAZ;SYN1;GJA1;TNS3;SPTAN1;YWHAG
Neurofibromatosis DOID-8712 mouse GSE1482 sample 668	14/360	0.23455	0.79995	0	0	1.24844	1.81034	NSF;ERDR1;TSC22D1;CLTC;SPPL3;YWHAZ;PCDHGA10;TRIM28;XPNPEP1;SYT11;ARIH1;PAIP2;SRSF11;YWHAG
Huntington's disease DOID-12858 mouse GSE3248 sample 727	10/246	0.238991	0.811795	0	0	1.30499	1.86787	HSP90AA1;SPARC;TSPAN9;KIT;ITPR1;FGF1;SPTAN1;RTN4;DLGAP4;STRN3
Hypoxia C0242184 human GSE4483 sample 440	11/275	0.240284	0.812897	0	0	1.28411	1.83105	MACF1;EGR1;PCDHGA11;HSPA8;LASP1;HSP90AA1;PALLD;UHRF1;YWHAZ;SRSF11;MCM2
Asthma, allergic C0155877 mouse GSE3184 sample 436	12/304	0.24089	0.811674	0	0	1.26721	1.80377	AKAP12;EEF1A1;SNAP47;TSC22D1;TSPAN9;ACTN4;FGF1;EEF2;SPTAN1;AKAP2;FGFR2;TNS1
mental retardation DOID-1059 human GSE6575 sample 1047	13/333	0.240976	0.808716	0	0	1.25326	1.78346	HIP1;PFKFB3;LIMK2;EBF1;IRAK3;TOPORS;MYO1E;GLT1D1;AIM2;CCPG1;SGK1;SOS1;CTNNAL1
MDS - Myelodysplastic syndrome C0026986 human GSE4619 sample 206	12/305	0.24426	0.816469	0	0	1.26306	1.78031	AKAP12;EEF1A1;TCERG1;PFKFB3;TSC22D1;UHRF1;SLC2A3;DENND6A;SGK1;TYMS;PAIP2;YWHAZ
pancreatic invasive intraductal papillary-mucinous carcinoma DOID-8150 human GSE19650 sample 610	10/248	0.246499	0.820685	0	0	1.29446	1.81277	EEF1A1;EGR1;HSPA8;GJA1;SPARC;PALLD;FN1;ANP32B;SGK1;RTN4
Type 1 diabetes mellitus C0011854 mouse GSE1659 sample 346	10/248	0.246499	0.817441	0	0	1.29446	1.81277	ANKRD28;SPARC;UBE2R2;PHKG1;CLTC;SMYD1;LARP4B;NUDT3;RTN4;HSPD1
Neurofibromatosis DOID-8712 mouse GSE1482 sample 665	13/335	0.247424	0.81728	0	0	1.24578	1.73992	NSF;MACF1;ERDR1;TSC22D1;CLTC;DSTN;SPPL3;NUDT3;EEF1A1;GJA1;TSPAN9;QK;PAFAH1B1
Down Syndrome C0013080 mouse GSE1611 sample 105	12/306	0.247646	0.814805	0	0	1.25893	1.75716	NSF;EEF1A1;HSPA8;SNAP47;GJA1;ANP32A;TSC22D1;TSPAN9;SYT11;PKP4;EEF2;STRN3
Type 2 diabetes mellitus C0011860 mouse GSE642 sample 320	12/306	0.247646	0.811622	0	0	1.25893	1.75716	HSPA8;HSP90AA1;HSP90AB1;TRIM28;UBE2R2;CCDC6;PKP4;LARP4B;TOP1;FGF1;YWHAZ;EPN1
Senescence C0001792 mouse GSE5078 sample 331	12/307	0.251051	0.819577	0	0	1.25483	1.7343	MACF1;HSPA8;HSP90AA1;RNGTT;SYT11;CLTC;AP3B1;TOP1;SIPA1L2;NUDT3;EPN1;ATF4
Huntington's disease DOID-12858 mouse GSE3248 sample 723	13/337	0.253937	0.825786	0	0	1.23838	1.69742	MACF1;HSPA8;HSP90AA1;HSP90AB1;USP10;TIMM23;SAMD4B;FGF1;EPN1;PCDHGA10;TSPAN9;MAPT;YWHAG
abdominal aortic aneurysm DOID-7693 human GSE47472 sample 1011	13/337	0.253937	0.822598	0	0	1.23838	1.69742	DARS;SPARC;GGNBP2;TSACC;SPATS1;GDF3;NCOR1;UBTD1;TLK1;E2F3;ANP32B;DENND6A;CFAP43
Neurological pain disorder C0423704 rat GSE2636 sample 129	13/338	0.257216	0.830017	0	0	1.23472	1.67655	HSPA8;HSP90AB1;IQSEC1;TESC;CLTC;EBF1;HSPE1;COX5A;HSPD1;PRX;FAT1;ANXA6;SPTAN1
JRA - Juvenile rheumatoid arthritis C0553662 human GSE7753 sample 176	11/280	0.258189	0.829962	0	0	1.26118	1.70772	EEF1A1;CX3CR1;ARPC2;ARHGEF3;EIF3H;COX1;MALAT1;QRICH1;IQGAP1;EEF2;FOXN2
Ventricular hypertrophy C0340279 mouse GSE4678 sample 313	11/280	0.258189	0.826794	0	0	1.26118	1.70772	ENAH;PPM1B;SPARC;ERDR1;GSTA4;MYO18A;EIF3H;ALPK3;ACACB;NUDT3;YWHAG
endometrial cancer DOID-1380 human GSE17025 sample 838	11/282	0.265476	0.846898	0	0	1.25223	1.66075	EEF1A1;TCERG1;EGR1;GJA1;TSC22D1;REV3L;RPSA;MALAT1;ANP32B;SGK1;SRSF11
systemic lupus erythematosus DOID-9074 human GSE55447 sample 1074	12/313	0.27182	0.863852	0	0	1.23078	1.60323	EGR1;AHCYL2;RAB31;ZMYND8;TSHZ2;ANXA6;TEX2;KCTD18;ELL2;PLEKHA7;PCDHGA9;MCPH1
Hepatitis C infection C0019196 human GSE2067 sample 309	8/197	0.272442	0.862563	0	0	1.30366	1.69519	EEF1A1;EGR1;HSP90AB1;IDH1;FN1;ENO1;HSPE1;HSPD1
Hepatic lipidosis C0015695 mouse GSE5538 sample 10	11/284	0.27283	0.860544	0	0	1.24342	1.61508	NDST1;ALDH1L1;HSP90AA1;SPARC;HSP90AB1;TSC22D1;ARPC2;TACC2;LARP4B;SPTAN1;HSPD1
Wilson disease DOID-893 mouse GSE5348 sample 966	11/284	0.27283	0.857321	0	0	1.24342	1.61508	EGR1;ALDH1L1;DEPTOR;ERDR1;FN1;SCAP;TIMM23;ELOVL6;LIFR;LARP4B;COX5A
nemaline myopathy DOID-3191 mouse GSE3384 sample 972	9/226	0.273355	0.855765	0	0	1.27843	1.6581	ANKRD28;ERDR1;AHNAK;UBE2R2;CCDC6;TAB2;NUDT3;STRN3;HSPD1
amyotrophic lateral sclerosis DOID-332 mouse GSE3343 sample 685	17/462	0.274727	0.856863	0	0	1.18127	1.52617	NSF;HSP90AB1;SPARC;CLTC;SAMD4B;HSPE1;NUDT3;SYN1;EPN1;PCDHGA10;ABLIM1;UBL3;SYT11;QRICH1;PAIP2;SH3GL2;YWHAG
systemic lupus erythematosus DOID-9074 human GSE10325 sample 692	11/285	0.276532	0.859296	0	0	1.23905	1.59272	EEF1A1;HSPA8;HSP90AA1;ABLIM1;USP10;NOSIP;EIF3H;RPSA;EEF2;LITAF;SORL1
Sepsis C0243026 rat GSE1781 sample 314	14/374	0.278569	0.862434	0	0	1.20171	1.53589	HSPA8;HSP90AB1;IDH1;TIMM23;ENO1;EEF2;LITAF;HSPD1;EEF1A1;CAPZB;ANXA6;EIF3H;RAF1;SPTAN1
Duchenne muscular dystrophy (DMD) C0013264 mouse GSE1472 sample 62	12/315	0.278866	0.860178	0	0	1.22296	1.56175	HSPA8;SPARC;HSP90AB1;ERDR1;UBE2R2;PHKG1;RPS6KA2;TIMM23;IGF2BP2;HSPE1;ATF4;HSPD1
schizophrenia 5419 human GSE12654 sample 465	12/316	0.28241	0.867921	0	0	1.21909	1.54141	NSF;CX3CR1;MAP2K1;DPP6;HSP90AB1;MYH9;RAPGEF5;YWHAZ;SORL1;SYN1;PCDHGA9;HSPD1
Severe acute respiratory syndrome (SARS) C1175175 human GSE1739 sample 165	15/405	0.282659	0.865515	0	0	1.18899	1.50231	CX3CR1;MACF1;HSPA8;HSP90AA1;HSP90AB1;EEF2;YWHAZ;PNRC1;HSPD1;SEPT9;ABLIM1;ARHGEF3;TACC1;SRSF11;EIF3A
Parkinson's disease DOID-14330 human GSE7621 sample 941	10/258	0.285195	0.870103	0	0	1.24429	1.56107	EGR1;TTYH2;ARPC2;VWF;DSTN;COX1;MALAT1;EEF2;YWHAZ;RTN4
Papillary Carcinoma of the Thyroid C0238463 human GSE3467 sample 397	8/200	0.285901	0.869099	0	0	1.28411	1.60784	DPP6;ZMAT4;KIT;GLIS3;ITPR1;BTBD11;LIFR;MAP4K3
Huntington's disease DOID-12858 mouse GSE3248 sample 722	11/288	0.287727	0.87149	0	0	1.22615	1.52746	TIAM1;HSPA8;UBL3;TSPAN9;CLTC;ANXA6;ITPR1;SPTAN1;NUDT3;RTN4;STRN3
Muscular Dystrophy C0026850 mouse GSE2629 sample 18	11/291	0.299051	0.90253	0	0	1.21351	1.46487	RCAN1;UBL3;HSP90AB1;CUL3;HSPB8;CUL1;DYM;TIMM23;ANK3;YWHAG;ATF4
Spinal Cord Injury C0037929 rat GSE2599 sample 426	13/351	0.301128	0.905543	0	0	1.18899	1.42705	HSPA8;HSP90AA1;HSP90AB1;IQSEC1;CLTC;CBFA2T2;COX5A;YWHAZ;SYN1;COX1;MAPT;BCAT1;YWHAG
Premature aging C0231341 human GSE10123 sample 55	11/292	0.302852	0.907474	0	0	1.20935	1.44458	ENAH;EEF1A1;HSPA8;SPARC;GSTA4;CAPZB;TPM3;CLTC;MOK;NAV1;SGK1
systemic juvenile idiopathic arthritis (sJIA) DOID-848 human GSE21521 sample 574	9/233	0.302879	0.904326	0	0	1.24002	1.48111	CX3CR1;GK5;HHAT;BNC2;ZMAT4;KIT;SH3BP4;TNFRSF21;BMPR1A
idiopathic pulmonary fibrosis DOID-0050156 human GSE24206 sample 871	12/323	0.307589	0.915133	0	0	1.19267	1.40615	AKAP12;EGR1;GLT1D1;PFKFB3;RPS6KA2;PDE4D;SLC2A3;IRAK3;TACC2;TOP1;SGK1;PTPRG
hepatitis C virus related hepatocellular carcinoma UMLS CUI-C1333978 human GSE58208 sample 736	6/147	0.309164	0.916568	0	0	1.31032	1.53816	ATF1;EPS8;GK5;LYPLA1;MALAT1;MAP4K3
Polycystic Ovary Syndrome C0032460 human GSE6798 sample 292	11/294	0.310491	0.917261	0	0	1.20112	1.40483	HSP90AA1;PPM1B;KCNJ6;PFKFB3;HSP90AB1;MXI1;MYO18A;MYH9;HSPE1;YWHAG;ATF4
Pulmonary Fibrosis C0034069 mouse GSE2640 sample 406	11/294	0.310491	0.914043	0	0	1.20112	1.40483	EEF1A1;MACF1;ANP32A;TSC22D1;GSTA4;KAT6A;MALAT1;PAIP2;FGF1;FGFR2;TNS1
anemia DOID-2355 human GSE4619 sample 793	11/294	0.310491	0.910847	0	0	1.20112	1.40483	AKAP12;EEF1A1;TCERG1;SEPT9;PFKFB3;UHRF1;EBF1;ANP32B;DENND6A;TYMS;PAIP2
Schizophrenia C0036341 human GSE12654 sample 226	12/324	0.311234	0.909846	0	0	1.18899	1.3878	NSF;RAP1GAP2;CX3CR1;MAP2K1;DPP6;MYH9;RAPGEF5;YWHAZ;SORL1;SYN1;PCDHGA9;HSPD1
endometrial cancer DOID-1380 human GSE17025 sample 843	11/295	0.314329	0.915701	0	0	1.19705	1.38537	EEF1A1;TCERG1;EGR1;TSC22D1;SLTM;REV3L;RPSA;MALAT1;SGK1;BCAT1;SRSF11
skin squamous cell carcinoma DOID-3151 human GSE45164 sample 657	11/295	0.314329	0.912532	0	0	1.19705	1.38537	FHOD3;DPP6;TCF7L1;TSC22D1;BNC2;PDGFC;SCAP;NMNAT2;SORL1;LGR4;BMPR1A
amyotrophic lateral sclerosis DOID-332 mouse GSE10953 sample 680	7/177	0.31449	0.909851	0	0	1.2696	1.46868	SNAP47;ATXN2;NRP2;TSC22D1;MALAT1;PLXDC1;EIF3A
tuberculosis DOID-399 human GSE54992 sample 564	12/325	0.31489	0.90788	0	0	1.18533	1.36969	AKAP12;EPHA4;PGAP1;IRAK2;KIT;TEX14;BCAT1;ELL2;SYN1;PTGES;ZSWIM3;RAI14
autism spectrum disorder DOID-0060041 human GSE63524 sample 1035	12/325	0.31489	0.904771	0	0	1.18533	1.36969	TGIF1;CX3CR1;SMAD3;ST8SIA1;SALL4;DENND2A;FAT1;PECAM1;PDGFA;SHROOM3;IRAK3;SORBS1
retinoblastoma DOID-768 mouse GSE6787 sample 455	8/207	0.317915	0.910343	0	0	1.24069	1.42179	HSPA8;TFDP1;UROS;ANP32B;TOP1;ELL2;FRYL;EPN1
cervical cancer DOID-4362 human GSE9750 sample 617	11/296	0.318178	0.907997	0	0	1.19301	1.36617	EGR1;HSPA8;GJA1;HSP90AB1;AHNAK;GSTA4;PALLD;DSTN;RPSA;SGK1;YWHAZ
colon carcinoma DOID-1520 mouse GSE422 sample 651	7/179	0.324505	0.922915	0	0	1.25541	1.41291	CREBBP;UBL3;ERDR1;SHROOM3;IGF2BP2;SGK1;EPN1
ulcerative colitis DOID-8577 human GSE11223 sample 591	11/298	0.325907	0.923771	0	0	1.185	1.32855	EPS8;DGKG;HSP90AA1;SALL1;STARD8;MGAT5B;IGF2BP1;PIP5K1B;SGK1;SOX5;STRN3
Congestive heart disease C0018802 mouse GSE2236 sample 258	12/328	0.325921	0.920698	0	0	1.17449	1.31672	FHOD3;EGR1;GJA1;HSP90AB1;TSC22D1;ALPK3;TACC2;PAIP2;FGF1;HSPE1;COX5A;HSPD1
Sendai virus infection C1319860 mouse GSE2935 sample 336	12/328	0.325921	0.917609	0	0	1.17449	1.31672	EPS8;RCAN1;MYO1E;GJA1;TRIM28;TSC22D1;TBL1XR1;RPS6KA2;AGO2;PKP4;PAIP2;EEF2
Chronic Lymphocytic Leukemia (Chronic B-lymphocytic leukemia) UMLS CUI-C0023434 human GSE26725 sample 745	13/359	0.329138	0.923568	0	0	1.16249	1.29185	EPHA4;EGR1;EBF1;ANK3;PTPRK;ELL2;SORL1;KLF3;TRIM28;GNG7;ANXA6;SGK1;MAP4K4
systemic lupus erythematosus DOID-9074 human GSE10325 sample 693	9/240	0.333111	0.931602	0	0	1.20385	1.32337	HSPA8;LASP1;ABLIM1;HSP90AB1;AIM2;AHNAK;EIF3H;RPSA;ARHGAP17
Breast Cancer C0006142 mouse GSE2528 sample 28	11/301	0.337576	0.940951	0	0	1.17319	1.27404	EEF1A1;GJA1;SPARC;HSP90AB1;TRIM28;ADRB3;AHNAK;IDH1;ELOVL6;SORBS1;YWHAG
Ventilator-associated lung injury C0340257 mouse GSE2411 sample 355	10/272	0.341887	0.949813	0	0	1.18025	1.26673	PCDHGA10;NDST1;SPARC;VWF;ST5;PRX;SLCO2A1;PECAM1;EEF2;TNS1
precursor B lymphoblastic lymphoma/leukemia DOID-7061 human GSE29639 sample 803	7/184	0.34975	0.968449	0	0	1.2213	1.28302	TLE4;ABLIM1;TENM4;KIT;PECAM1;PTPRK;TNFRSF21
Parkinson's disease DOID-14330 human GSE7621 sample 940	13/365	0.350518	0.967385	0	0	1.14338	1.19866	NSF;DDC;KCNJ6;DSTN;RPSA;EEF2;RTN4;ANP32B;ERC2;BCAT1;KANK4;YWHAG;TNFRSF21
Squamous cell carcinoma of lung C0149782 human GSE3268 sample 441	12/335	0.351971	0.968208	0	0	1.14995	1.20078	AKAP12;CX3CR1;EGR1;VWF;RPS6KA2;HSPB8;KIT;SLCO2A1;ARHGEF3;PECAM1;CTNNAL1;JAM2
schizophrenia DOID-5419 human GSE12679 sample 543	11/305	0.353253	0.968561	0	0	1.1578	1.20477	RAP1GAP2;TCERG1;HSPA8;HSP90AA1;KCNT2;TSACC;FAM189A1;MALAT1;SMYD3;ERC2;ATF4
diffuse large B-cell lymphoma DOID-0050745 mouse GSE6136 sample 687	13/366	0.354107	0.967739	0	0	1.14026	1.18377	HSP90AA1;HSP90AB1;ERDR1;UHRF1;TIMM23;EEF2;HSPE1;COX5A;HSPD1;TFDP1;TRIM28;ARPC2;ANP32B
myelodysplastic syndrome DOID-0050908 human GSE19429 sample 747	10/276	0.358456	0.976443	0	0	1.16314	1.19333	AKAP12;EEF1A1;TCERG1;HSPA8;PFKFB3;HSP90AB1;EBF1;MALAT1;SLC2A3;PAIP2
rheumatoid arthritis DOID-7148 human GSE10500 sample 779	13/368	0.361304	0.981015	0	0	1.13406	1.15452	SRRM2;IDH1;IQGAP1;EEF2;SORL1;SEPT9;LASP1;TRIM28;STK24;CAPZB;TNIP1;ST5;MYH9
adrenoleukodystrophy DOID-10588 human GSE34309 sample 864	12/338	0.363245	0.983105	0	0	1.13974	1.15419	ICK;ANKRD28;EGR1;UBL3;IGSF3;CRADD;MOK;ATP2B4;TSPAN5;TRIM16;TNFRSF21;TBX3
Down syndrome DOID-14250 human GSE42956 sample 1060	9/247	0.363843	0.981557	0	0	1.16974	1.18264	DEPTOR;TENM4;AUTS2;WWC1;TSHZ2;EBF1;ARHGEF3;ROR2;SOS1
Purpura, Idiopathic Thrombocytopenic C0043117 human GSE574 sample 358	3/69	0.364351	0.979777	0	0	1.39577	1.40922	EEF1A1;SEPT9;SPTAN1
Asthma, allergic C0155877 human GSE3004 sample 360	8/217	0.3647	0.977583	0	0	1.18351	1.19378	EEF1A1;ALDH1L1;ANAPC15;AHNAK;DSTN;SRGAP3;FOXN3;EEF2
amyotrophic lateral sclerosis DOID-332 rat GSE7493 sample 682	11/308	0.365086	0.975501	0	0	1.14653	1.15526	EEF1A1;HSP90AA1;HSP90AB1;ZFP219;FAT1;QK;COX1;TACC2;HSPE1;PRRC2B;ZFP462
nemaline myopathy DOID-3191 mouse GSE3384 sample 974	5/128	0.368576	0.9817	0	0	1.25401	1.25164	TAB2;IGF2BP2;NUDT3;RTN4;PNRC1
cerebral palsy DOID-1969 human GSE31243 sample 503	11/309	0.369042	0.979831	0	0	1.14282	1.13921	PFKFB3;HSP90AB1;CAPZB;PHKG1;MXI1;ANXA6;SGK1;EEF2;SLC25A12;RTN4;TTN
cerebral palsy DOID-1969 human GSE31243 sample 877	11/309	0.369042	0.97674	0	0	1.14282	1.13921	HSPA8;LYPLA1;PFKFB3;HSP90AB1;CAPZB;PHKG1;ANXA6;ANK3;EEF2;SLC25A12;RTN4
nephrosclerosis DOID-11664 human GSE20602 sample 905	8/218	0.369422	0.974671	0	0	1.17808	1.17315	TGIF1;EGR1;TCF7L1;ANK2;ARHGAP5;SLC28A1;SH3GL2;PCDHGA9
Huntington's disease DOID-12858 mouse GSE9038 sample 718	13/371	0.37214	0.978763	0	0	1.12489	1.11194	FHOD3;CASP8AP2;ZFP654;ERDR1;SRC;GALNT2;IDH1;COMMD1;FGF1;ZZZ3;CCPG1;AGO2;ZSWIM3
Primary open angle glaucoma C0339573 human GSE2705 sample 257	9/249	0.372686	0.977135	0	0	1.16034	1.14528	ANKRD28;CEMIP;SMAD3;GSTA4;BNC2;FNBP1;KIT;MXI1;MID1
colorectal cancer DOID-9256 human GSE1323 sample 763	9/249	0.372686	0.974091	0	0	1.16034	1.14528	HSPA8;HSP90AA1;TRIM28;TSC22D1;DSTN;SLC2A3;ENO1;ACTN4;COX5A
Hypoxia C0242184 mouse GSE2271 sample 446	11/310	0.373004	0.971895	0	0	1.13913	1.12337	SPARC;CTBP2;SLC44A1;CAPZB;SALL4;MAPT;CTNNAL1;TOPORS;FGFR2;MED13L;MCM2
Dermatomyositis C0011633 human GSE5370 sample 334	10/280	0.375129	0.974407	0	0	1.14653	1.12415	EEF1A1;HSPA8;HSP90AB1;VWF;PHKG1;TPM3;ANXA6;EEF2;COX5A;PNRC1
Teratospermia UMLS CUI-C0919628 human GSE6872 sample 953	13/372	0.375762	0.973039	0	0	1.12187	1.09808	HSPA8;HSP90AA1;GGNBP2;TSACC;NOSIP;EEF2;EEF1A1;GLT1D1;ARPC2;EIF3H;COX1;MALAT1;PAIP2
schizophrenia DOID-5419 human GSE62105 sample 547	11/311	0.37697	0.973163	0	0	1.13547	1.10775	SALL1;ST8SIA1;TESC;PCED1B;IRAK3;TULP2;GDF3;CCDC141;PKNOX2;ASIC1;TTN
COPD - Chronic obstructive pulmonary disease C0024117 human GSE475 sample 343	11/311	0.37697	0.970178	0	0	1.13547	1.10775	AKAP12;EEF1A1;EGR1;GJA1;SPARC;PFKFB3;HSP90AB1;TSC22D1;FN1;SGK1;EEF2
Oligodendroglioma C0028945 human GSE2223 sample 116	11/311	0.37697	0.967211	0	0	1.13547	1.10775	NSF;EPHA4;MYO1E;EXOSC5;EPB41L1;ITPR1;PKP4;ANK3;RNF220;WDTC1;ARHGAP23
Treacher Collins syndrome DOID-2908 mouse GSE10167 sample 480	12/342	0.378356	0.967807	0	0	1.12641	1.09478	SEPT9;MAP2K1;TRIM28;ANP32A;ERDR1;GSTA4;UHRF1;ARFIP1;IGF2BP2;PAIP2;EIF3A;BRD4
chronic myeloid leukemia DOID-8552 mouse GSE48438 sample 501	8/220	0.378881	0.966203	0	0	1.16737	1.13297	SPRED2;GSTA4;ARL15;EBF1;TLK1;B430212C06RIK;IFT46;RAI14
melanoma in situ UMLS CUI-C0346040 human GSE4587 sample 980	14/404	0.380143	0.966485	0	0	1.11247	1.07599	EGR1;HSP90AA1;SPARC;AHNAK;FN1;DSTN;RPSA;EEF2;PNRC1;RTN4;ABLIM1;EIF3H;ANP32B;ATF4
Huntington's disease DOID-12858 mouse GSE3248 sample 728	11/312	0.380941	0.965587	0	0	1.13183	1.09234	NSF;HSPA8;SNAP47;HSP90AA1;ABLIM1;UBL3;HSP90AB1;ANP32A;ARPC2;TIMM23;RTN4
Thrombocytopenia C0040034 mouse GSE2527 sample 253	13/374	0.383019	0.967931	0	0	1.11587	1.07087	ANKRD28;TSC22D1;VWF;GALNT2;TESC;IDH1;DSTN;ACTN4;NUDT3;CAPZB;XPNPEP1;PECAM1;MYH9
ulcerative colitis DOID-8577 human GSE11223 sample 589	9/252	0.385984	0.972495	0	0	1.14653	1.09144	ABR;SALL1;MGAT5B;DENND2A;VTI1A;GLTSCR1L;FRYL;KANK4;BRD4
Dehydration C0011175 rat GSE3131 sample 60	13/375	0.386654	0.971265	0	0	1.11289	1.0575	DARS;HSP90AA1;SPARC;HSP90AB1;TSC22D1;HSPE1;YWHAZ;EPN1;HSPD1;SYT11;MAPT;BCAT1;YWHAG
autism spectrum disorder DOID-0060041 human GSE28521 sample 1041	10/283	0.387684	0.970945	0	0	1.13437	1.07489	NSF;CTIF;GSK3B;VWF;LUZP1;IQSEC1;TESC;KIT;NMNAT2;SLC25A12
Osteoarthritis C0029408 human GSE16464 sample 199	10/283	0.387684	0.968056	0	0	1.13437	1.07489	AKAP12;EGR1;PCDHGA12;CEMIP;RPS6KA2;IDH1;EIF3H;SGK1;EEF2;ATF4
Autism DOID-0060041 human GSE25507 sample 464	12/345	0.389735	0.970289	0	0	1.11662	1.05218	RAB31;ANP32A;MXI1;PECAM1;RICTOR;ACTN4;JARID2;SGK1;EEF2;LITAF;SORL1;YWHAG
swine influenza DOID-0050211 human GSE48466 sample 498	11/315	0.392875	0.975213	0	0	1.12105	1.04735	HSPA8;GJA1;HSP90AA1;ABLIM1;HSP90AB1;DSTN;EIF3H;COX1;RPSA;ENO1;EEF2
Gastrointestinal stromal tumor C0238198 human GSE2719 sample 270	8/224	0.397834	0.98461	0	0	1.14653	1.05678	AKAP12;GJA1;SPARC;AHNAK;VWF;FN1;PECAM1;SGK1
Cystic Fibrosis C0010674 mouse GSE765 sample 65	10/286	0.400266	0.987716	0	0	1.12247	1.02776	HSPA8;DDC;UBL3;TSC22D1;AHNAK;GSTA4;IDH1;SGK1;ELL2;EPN1
Systemic lupus erythematosus (SLE) C0024141 human GSE12374 sample 123	9/256	0.403755	0.993404	0	0	1.12861	1.02359	STOX2;EPB41L4A;KCNJ6;PPP1R12A;EXOC4;IQGAP1;ROR2;RAPGEF5;MCC
Leukemia, Acute Megakaryocytic C0023462 mouse GSE2433 sample 95	11/318	0.404833	0.993143	0	0	1.11047	1.00418	NSF;SEPT9;ARPC2;CAPZB;VWF;GALNT2;IDH1;DSTN;TACC1;SGK1;YWHAZ
endometriosis DOID-289 human GSE6364 sample 945	11/318	0.404833	0.990248	0	0	1.11047	1.00418	PCDHGA12;TRIM28;ANXA6;RPSA;MALAT1;ARHGAP17;ACTN4;SGK1;EEF2;YWHAG;PNRC1
systemic lupus erythematosus DOID-9074 human GSE55447 sample 1073	11/318	0.404833	0.987369	0	0	1.11047	1.00418	SCAF8;CDK7;TENM4;ZMIZ1;TSPAN9;CUL3;CISD2;SMYD3;TOP1;PKNOX1;SHB
fragile X syndrome DOID-14261 human GSE7329 sample 809	10/288	0.408664	0.993822	0	0	1.11468	0.997484	EPS8;DDC;TTLL3;PALLD;IGF2BP1;APBB2;PTPRK;SIPA1L2;MCC;TNFRSF21
endometrial cancer DOID-1380 human GSE17025 sample 849	11/322	0.420796	1	0	0	1.09668	0.949292	EEF1A1;TCERG1;EGR1;GJA1;TSC22D1;SLTM;PALLD;REV3L;RPSA;EEF2;SRSF11
Dehydration C0011175 rat GSE4130 sample 210	11/322	0.420796	1	0	0	1.09668	0.949292	SRRM2;EEF1A1;GJA1;ALDH1L1;AHNAK;GSTA4;PAPD5;FAT1;DSTN;RPSA;PGPEP1
Hypertrophy C0020564 rat GSE739 sample 57	10/292	0.425462	1	0	0	1.09941	0.939532	EGR1;HSPA8;HSP90AA1;SPARC;AHNAK;IQSEC1;FAT1;ATP2B4;MYH9;EPN1
melanoma DOID-1909 human GSE6887 sample 950	10/293	0.42966	1	0	0	1.09566	0.925568	EGR1;MYO1E;DYX1C1;SLC39A11;SIPA1L2;SGK1;DDX60;DCAF4;PLXDC1;TTN
MELAS - Mitochondrial myopathy, encephalopathy, lactic acidosis and stroke-like episodes C0162671 human GSE1462 sample 102	6/169	0.431213	1	0	0	1.13974	0.958697	DEPTOR;TPM3;RPSA;SGK1;SLC25A12;ATF4
Alcoholic Hepatitis DOID-12351 human GSE28619 sample 477	11/325	0.432768	1	0	0	1.08655	0.910048	AKAP12;EGR1;RCAN1;MAP2K1;NCOR1;SALL1;PFKFB3;SGK1;ELL2;SORL1;KANK4
Cardiac Failure C0018801 mouse GSE1988 sample 273	11/325	0.432768	1	0	0	1.08655	0.910048	TSC22D1;UBE2R2;PALLD;TESC;TIMM23;COMMD1;PAIP2;COX5A;ACACB;NUDT3;HSPD1
Obstructive sleep apnea C0520679 mouse GSE1873 sample 217	11/325	0.432768	1	0	0	1.08655	0.910048	GSK3B;DNMBP;ZMYND8;AGO2;IL6RA;MALAT1;TOP1;ELL2;AKAP2;TNS1;WDTC1
autism spectrum disorder DOID-0060041 human GSE25507 sample 1025	12/357	0.435434	1	0	0	1.07908	0.897163	RAB31;CAPZB;ANXA6;RAB27A;COX1;SLC2A3;ENO1;ACTN4;PAIP2;EEF2;LITAF;YWHAZ
Dermatomyositis C0011633 human GSE1551 sample 130	8/232	0.435734	1	0	0	1.10699	0.919603	TPM3;RPSA;TACC2;EEF2;SLC25A12;PNRC1;ATF4;TTN
Spinal Cord Injury C0037929 rat GSE16710 sample 427	11/326	0.436756	1	0	0	1.08322	0.897319	GGNBP2;TFDP1;KDM4C;GSTA4;CRTAC1;ACSL6;DSTN;MEMO1;LARP4B;FBXO11;PTGES
endometrial cancer DOID-1380 human GSE17025 sample 842	10/295	0.43805	1	0	0	1.08823	0.898248	TCERG1;EGR1;GJA1;TSC22D1;REV3L;IFT80;RPSA;MALAT1;SGK1;SRSF11
Status Epilepticus C0038220 rat GSE4236 sample 391	9/264	0.439295	1	0	0	1.09441	0.900245	DARS;AGO2;COX1;MAPT;HSPE1;YWHAZ;SH3GL2;TNFRSF21;PAFAH1B1
systemic lupus erythematosus DOID-9074 human GSE55447 sample 1079	11/327	0.440742	1	0	0	1.07991	0.884763	QTRT1;CDK7;PPP1R12A;ANP32A;CRADD;AUTS2;FBRSL1;ACTN4;TOP1;XXYLT1;KDM6A
Lung transplant rejection C0729958 human GSE2018 sample 66	9/265	0.443727	1	0	0	1.09028	0.885905	HSPA8;LASP1;HSP90AA1;RAB31;HSP90AB1;ARPC2;FN1;LITAF;RTN4
Lewy body dementia DOID-12217 human GSE49036 sample 1068	8/234	0.445176	1	0	0	1.09753	0.888214	RAP1GAP2;EGR1;RIMS1;KCNJ6;TENM4;FAM189A1;ERC2;KANK4
Appendicitis C0003615 human GSE9579 sample 98	10/298	0.450614	1	0	0	1.07727	0.858741	EEF1A1;EGR1;SPARC;TSC22D1;HSPB8;DSTN;ACTN4;EEF2;COX5A;PNRC1
lupus erythematosus DOID-8857 human GSE30153 sample 739	9/267	0.452576	1	0	0	1.08211	0.857899	EGR1;PLEKHG1;RAB31;AIM2;TENM4;TET2;ATP2B4;SH3BP4;TNS3
Down syndrome DOID-14250 human GSE20910 sample 1063	9/267	0.452576	1	0	0	1.08211	0.857899	EEF1A1;HSPA8;HSP90AA1;HSP90AB1;STK24;WAC;YWHAZ;PNRC1;ATF4
H1N1 DOID-0050211 human GSE27131 sample 514	6/173	0.453288	1	0	0	1.11339	0.880944	CX3CR1;EPHA4;KLF12;SMAD3;AHNAK;BMPR1A
Cancer of Colon C0007102 human GSE4107 sample 245	12/362	0.454461	1	0	0	1.06418	0.839257	HSPA8;AHCYL2;IDH1;MXI1;RPSA;MALAT1;ACTN4;EEF2;LITAF;COX5A;YWHAZ;CD2AP
Breast Cancer C0006142 human GSE1378 sample 52	10/299	0.454795	1	0	0	1.07367	0.845953	AKAP12;CX3CR1;GJA1;TENM3;HSPB8;GLIS3;ANK2;NCAM1;SMYD3;GATAD2B
multiple sclerosis DOID-2377 human GSE21942 sample 743	10/299	0.454795	1	0	0	1.07367	0.845953	EEF1A1;HSPA8;ARPC2;PECAM1;COX1;LNPEP;ENO1;IQGAP1;YWHAZ;YWHAG
obesity DOID-9970 mouse GSE55389 sample 612	6/174	0.458778	1	0	0	1.10699	0.862555	KATNAL2;FUT9;CHEK1;MALAT1;ANP32B;TOPORS
myelodysplastic syndrome DOID-0050908 human GSE19429 sample 749	10/300	0.458972	1	0	0	1.07009	0.833351	AKAP12;EEF1A1;TCERG1;SEPT9;UHRF1;EBF1;MDM4;ANP32B;TYMS;PAIP2
head and neck squamous cell carcinoma 5520 human GSE6631 sample 458	8/237	0.459294	1	0	0	1.08364	0.843139	ABLIM1;TSC22D1;AHNAK;DSTN;TACC1;SLC2A3;ACTN4;ATF4
hepatocellular carcinoma DOID-684 human GSE49515 sample 554	9/269	0.461405	1	0	0	1.07407	0.830769	EPS8;PLEKHG1;PFKFB3;TPM3;MXI1;EBF1;SLC2A3;PTPRK;CHD2
Muscular Dystrophy C0026850 mouse GSE3252 sample 158	8/238	0.463986	1	0	0	1.07908	0.82863	HSPA8;HSP90AB1;SMYD1;SGK1;HSPE1;TNS1;HSPD1;TTN
Diabetic Neuropathy C0011882 mouse GSE11343 sample 7	11/333	0.464603	1	0	0	1.06045	0.812913	HSP90AA1;SPARC;CFDP1;HSP90AB1;FN1;MALAT1;SIPA1L2;PAIP2;HSPE1;PLXDC1;HSPD1
Alcohol poisoning C0392620 rat GSE3311 sample 288	11/333	0.464603	1	0	0	1.06045	0.812913	EEF1A1;TRIM28;DNAJA2;EIF3H;RPSA;ANP32B;EEF2;SPPL3;EIF3A;ATF4;WDTC1
Vulvar intraepithelial tumor UMLS CUI-C0346210 human GSE5563 sample 967	9/270	0.46581	1	0	0	1.07009	0.817524	EEF1A1;EGR1;GJA1;GSTA4;FN1;EIF3H;COX1;EEF2;RTN4
Pauciarticular juvenile arthritis C0157917 human GSE1402 sample 430	9/270	0.46581	1	0	0	1.07009	0.817524	CX3CR1;CEMIP;SALL1;AGO2;GRIK3;LIFR;TULP2;FOXN2;DCAF4
Setleis syndrome C1744559 human GSE16524 sample 285	7/207	0.466743	1	0	0	1.0856	0.827202	EEF1A1;GJA1;CEMIP;PFKFB3;PALLD;FN1;RAI14
ulcerative colitis DOID-8577 human GSE11223 sample 590	9/271	0.470209	1	0	0	1.06614	0.804488	STARD8;MGAT5B;IGF2BP1;JMJD1C;HS3ST5;ENO1;TOP1;YWHAZ;SOX5
Leukemia, Adult T Cell C0023493 human GSE10789 sample 351	11/335	0.472524	1	0	0	1.05412	0.790238	HSPA8;GJA1;HSP90AA1;HSP90AB1;CDCA3;SLC2A3;CDYL;HSPE1;YWHAG;CD2AP;HSPD1
invasive ductal carcinoma DOID-3008 human GSE5764 sample 626	11/335	0.472524	1	0	0	1.05412	0.790238	EEF1A1;EGR1;TSC22D1;AUTS2;VWF;KIT;ANXA6;MALAT1;ACTN4;EEF2;ATF4
multiple myeloma DOID-9538 human GSE6691 sample 787	5/146	0.478959	1	0	0	1.09941	0.809318	TOR3A;FNBP1;ANKRD11;NOD1;SYN1
endometrial cancer DOID-1380 human GSE17025 sample 845	9/273	0.478984	1	0	0	1.05833	0.779026	EEF1A1;TCERG1;EGR1;GJA1;TSC22D1;RPSA;MALAT1;SGK1;SRSF11
amyotrophic lateral sclerosis DOID-332 mouse GSE10953 sample 681	11/337	0.480425	1	0	0	1.04786	0.768171	RIMS2;EEF1A1;SNAP47;TSC22D1;TESC;TIMM23;PAIP2;COX5A;PLXDC1;RTN4;HSPD1
ulcerative colitis DOID-8577 human GSE1710 sample 993	12/370	0.48474	1	0	0	1.04117	0.753954	PLEKHG1;PFKFB3;UBXN2A;NSMCE2;ALDH16A1;RICTOR;FOXN3;IGF2BP2;RBPJ;LITAF;SIPA1L3;GATAD2A
autism spectrum disorder DOID-0060041 human GSE7329 sample 1034	10/308	0.492175	1	0	0	1.0423	0.738906	EPS8;DDC;PALLD;STARD8;PECAM1;IGF2BP1;TSPAN5;APBB2;SIPA1L2;RAPGEF5
Idiopathic fibrosing alveolitis C0085786 human GSE10921 sample 272	12/374	0.49976	1	0	0	1.03003	0.71446	RCAN1;HSP90AA1;TENM4;CAPZB;WTAP;FAM189A1;LAMC2;ENO1;RBPJ;PAIP2;PLXDC1;TNFRSF21
colorectal adenocarcinoma DOID-0050861 human GSE24514 sample 595	11/342	0.500068	1	0	0	1.03254	0.715563	AKAP12;RCAN1;AHCYL2;PALLD;HSPB8;DSTN;SORBS1;TACC2;SGK1;TNFRSF21;TNS1
diabetic retinopathy DOID-8947 mouse GSE12610 sample 911	9/278	0.500768	1	0	0	1.0393	0.71879	RABGEF1;HSP90AA1;CUL3;TIMM23;ANP32B;SGK1;EEF2;NUDT3;ATF4
Eczema DOID-3310 human GSE32924 sample 509	10/312	0.508595	1	0	0	1.02893	0.695665	SPEN;AHNAK;PALLD;PDGFC;EXOC4;TSPAN5;MALAT1;IQGAP1;ARIH1;TOP1
Huntington's disease DOID-12858 mouse GSE9038 sample 717	10/312	0.508595	1	0	0	1.02893	0.695665	SPEN;ERDR1;A330033J07RIK;AGO2;DAB2IP;COMMD1;TBL1X;PLXDC1;SOX2OT;1600020E01RIK
invasive lobular carcinoma DOID-3457 human GSE5764 sample 625	10/313	0.512677	1	0	0	1.02565	0.685244	EEF1A1;HSP90AA1;TRIM28;ST5;KIT;ANXA6;COMMD1;WDR45;EEF2;ATF4
COPD - Chronic obstructive pulmonary disease C0024117 human GSE3320 sample 255	14/442	0.513013	1	0	0	1.01683	0.678686	HSPA8;HSP90AA1;HSP90AB1;TSC22D1;EEF2;LITAF;HSPD1;EPS8;PCM1;PPP4R1;TRIM28;PDGFC;SP3;ATF4
salivary gland adenoid cystic carcinoma DOID-4866 human GSE36820 sample 511	8/249	0.514923	1	0	0	1.03141	0.684589	EGR1;ABLIM1;DEPTOR;TESC;DSTN;MALAT1;IQGAP1;ELL2
Hypertension C0020538 mouse GSE1674 sample 400	9/282	0.51801	1	0	0	1.02456	0.673913	EEF1A1;MACF1;SEPT9;GJA1;DDC;SPARC;IDH1;CLTC;ELOVL6
Cancer of the Intestine C0346627 mouse GSE3915 sample 90	10/315	0.52081	1	0	0	1.01913	0.664852	HSP90AA1;HSP90AB1;ERDR1;DSTN;RPSA;MALAT1;ACTN4;COX5A;YWHAZ;HSPD1
Diamond-Blackfan anaemia DOID-1339 human GSE14335 sample 472	7/218	0.521224	1	0	0	1.03082	0.671657	EPS8;DEPTOR;FNBP1;RPS6KA2;IDH1;SGK1;ENOX1
pancreatic intraductal papillary-mucinous adenoma DOID-7851 human GSE19650 sample 608	9/284	0.526559	1	0	0	1.01734	0.652514	EGR1;GJA1;SPARC;PALLD;PDGFC;FN1;ANP32B;RTN4;YWHAG
polycystic ovary syndrome DOID-11612 human GSE48301 sample 559	13/414	0.528019	1	0	0	1.00806	0.643768	SPARC;IDH1;SPATS1;ANKRD45;FN1;SLC39A11;EBF1;SLC2A3;ENO1;EEF2;GJA1;CFAP43;IFT46
Infertility due to azoospermia C1321542 mouse GSE3676 sample 151	6/187	0.528607	1	0	0	1.03003	0.656657	AKAP12;CCND3;LYPLA1;HSP90AA1;CUL3;PECAM1
sarcoidosis DOID-11335 human GSE19314 sample 708	10/317	0.5289	1	0	0	1.0127	0.645047	CCND3;HHAT;ABLIM1;MAML2;TSHZ2;KIT;PDGFA;PTPRK;PIGL;CCNJL
endometriosis DOID-289 human GSE23339 sample 883	9/285	0.530814	1	0	0	1.01377	0.642066	EEF1A1;DARS;PALLD;SLCO2A1;ATP2B4;TBL1X;SAE1;FAM129B;RAI14
Gastrointestinal stromal tumor C0238198 human GSE15966 sample 76	7/220	0.530918	1	0	0	1.02145	0.646728	EGR1;PCDHGA12;XPNPEP1;ITPR1;CDC37L1;B3GNT2;KANK4
systemic lupus erythematosus DOID-9074 human GSE55447 sample 1072	10/318	0.532929	1	0	0	1.00952	0.635359	RNF168;SART3;TSPAN9;NSMCE2;TSHZ2;MOK;TOP1;SIPA1L3;SRCIN1;DLGAP4
lung squamous cell carcinoma DOID-3907 human GSE51852 sample 734	8/253	0.533055	1	0	0	1.01511	0.638635	CX3CR1;HSPB8;DENND2A;ANXA6;FAM189A1;LIFR;JAM2;SH3GL2
Barrett's esophagus DOID-9206 human GSE1420 sample 643	9/286	0.535055	1	0	0	1.01023	0.63178	ABLIM1;GSTA4;ARPC2;PALLD;HSPB8;MXI1;FN1;DSTN;TRIM16
Breast Cancer C0006142 human GSE3744 sample 24	14/449	0.536933	1	0	0	1.00098	0.622488	FHOD3;NTRK2;EGR1;TCF7L1;TESC;TSHZ2;EBF1;PDGFA;LIFR;FGF1;IL17RD;KIT;MXI1;JAM2
Type 2 diabetes mellitus C0011860 human GSE12643 sample 274	8/254	0.537549	1	0	0	1.01111	0.627632	TCERG1;GSK3B;PPP1R12A;CAPZB;ANXA6;PDGFA;TSPAN5;BICD1
GERD - Gastro-esophageal reflux disease C0017168 human GSE2144 sample 27	8/254	0.537549	1	0	0	1.01111	0.627632	EEF1A1;TRIM28;RPSA;ACTN4;TYMS;HSPE1;TNS3;ATF4
Squamous cell carcinoma of mouth C0585362 human GSE3524 sample 295	7/224	0.550071	1	0	0	1.00321	0.599627	TIAM1;ABLIM1;SMAD3;AHNAK;HSPB8;POU2F3;TBX3
anemia DOID-2355 human GSE4619 sample 791	9/290	0.551879	1	0	0	0.996292	0.592221	EEF1A1;TCERG1;PFKFB3;TSC22D1;SLC2A3;DENND6A;SGK1;YWHAZ;MCM2
idiopathic urticaria DOID-1555 human GSE57178 sample 815	6/192	0.554485	1	0	0	1.00321	0.591608	DEPTOR;VWF;IDH1;EBF1;PECAM1;TNS1
CML - Chronic myeloid leukemia C0023473 human GSE4170 sample 4	5/159	0.55453	1	0	0	1.00952	0.595248	SALL1;FN1;TEX14;SYN1;PTPRG
dengue disease DOID-12205 human GSE51808 sample 556	7/225	0.554807	1	0	0	0.998752	0.5884	KIT;MXI1;TSPAN5;IGF2BP2;SGK1;MPZL1;CCNJL
Malignant Melanoma C0025202 human GSE4587 sample 326	8/258	0.555354	1	0	0	0.995433	0.585463	EGR1;GJA1;TRIM28;ANXA6;RPSA;EEF2;RTN4;ATF4
Barrett's esophagus DOID-9206 human GSE34619 sample 453	9/291	0.556048	1	0	0	0.992868	0.582715	TIAM1;DENND2C;GJA1;PPP2R2C;HSPB8;TRPS1;BTBD11;ELL2;FAM129B
Familial hypophosphataemic rickets C0733682 mouse GSE868 sample 172	10/324	0.556838	1	0	0	0.990825	0.580108	HSP90AA1;ANP32A;FUT9;ANK3;SGK1;PAIP2;HSPE1;EPN1;IGF1R;HSPD1
dengue hemorrhagic fever DOID-12206 human GSE51808 sample 557	7/226	0.559521	1	0	0	0.994332	0.577383	KIT;MXI1;TSPAN5;SGK1;SORL1;CCNJL;IGF1R
autism spectrum disorder DOID-0060041 human GSE28521 sample 1040	8/259	0.559761	1	0	0	0.99159	0.575365	NSF;CTIF;MAP2K1;VWF;IQGAP1;SLC25A12;SH3GL2;PIAS2
Arrhythmogenic Right Ventricular Cardiomyopathy C0349788 mouse GSE4120 sample 432	9/292	0.560201	1	0	0	0.989468	0.573357	FHOD3;HSPA8;GJA1;ARPC2;TIMM23;DSTN;ALPK3;FGF1;COX5A
systemic lupus erythematosus DOID-9074 human GSE55447 sample 1078	11/358	0.561449	1	0	0	0.986397	0.569382	PHC1;ZDHHC19;AGK;DYM;SMYD3;XXYLT1;PLEKHA7;IWS1;MED13L;DLGAP4;MCPH1
Hepatitis, Autoimmune C0241910 mouse GSE867 sample 230	7/227	0.564213	1	0	0	0.989952	0.566573	ERDR1;ARPC2;UBE2R2;DSTN;ELOVL6;RTN4;EPN1
Huntington's disease DOID-12858 mouse GSE3583 sample 929	9/293	0.564338	1	0	0	0.986091	0.564145	AKAP12;TENM3;SALL1;TENM4;GSTA4;SYT11;ACSL6;TRIM16;RHPN2
Type 1 diabetes mellitus C0011854 mouse GSE11 sample 178	9/294	0.568458	1	0	0	0.982737	0.555077	MOV10;LASP1;KMT2C;MXI1;MYH9;DCAF4;TNS3;SPPL3;FBXL12
polycystic ovary syndrome DOID-11612 human GSE48301 sample 558	15/492	0.571065	1	0	0	0.978742	0.548343	ANKRD28;NSF;SMAD2;EPHA4;PLEKHG1;NRP2;VWF;ENO1;MAPK14;CAPZB;SLCO2A1;PECAM1;RAPGEF5;IFT46;SNTB2
endometrial cancer DOID-1380 human GSE17025 sample 841	10/328	0.572508	1	0	0	0.978742	0.545872	EEF1A1;METTL23;TCERG1;EGR1;GJA1;TSC22D1;SLTM;RPSA;SGK1;SRSF11
inflammatory bowel disease DOID-0050589 human GSE4183 sample 551	8/263	0.577197	1	0	0	0.976509	0.536661	EEF1A1;AHCYL2;MXI1;COX1;RPSA;MALAT1;EEF2;COX5A
nicotine dependence DOID-0050742 human GSE6264 sample 582	7/230	0.578151	1	0	0	0.97704	0.535341	HSPA8;HSP90AB1;CAPZB;EIF3H;ANP32B;PAIP2;PAK4
Atherosclerosis C0004153 mouse GSE1560 sample 77	6/197	0.579692	1	0	0	0.977748	0.533125	CCND3;FAM53B;PGPEP1L;SRPK1;PCDHGA9;U2AF1L4
Acute Lung Injury C0242488 human GSE10474 sample 168	10/330	0.580255	1	0	0	0.97281	0.529489	CX3CR1;DNMBP;TSC22D1;SGMS1;ZMIZ1;COG5;AGO2;DSTN;SGK1;HSPD1
Myocardial Infarction C0027051 rat GSE4105 sample 437	8/264	0.581507	1	0	0	0.97281	0.527392	HSPA8;TSC22D1;DNAJA2;COX1;MSI2;ACSS1;HSPD1;TTN
Neurofibromatosis DOID-8712 mouse GSE1482 sample 667	7/231	0.582749	1	0	0	0.97281	0.525316	PCDHGA10;EEF1A1;SYT11;IGF2BP2;YWHAZ;YWHAG;EPN1
actinic keratosis DOID-8866 human GSE2503 sample 628	13/430	0.583483	1	0	0	0.970548	0.522872	HSP90AB1;IDH1;HSPB8;CLTC;RPSA;EEF2;COX5A;RTN4;TTN;HSPD1;EEF1A1;GSTA4;EIF3H
diffuse large B-cell lymphoma DOID-0050745 mouse GSE6136 sample 686	12/397	0.583516	1	0	0	0.97036	0.522716	HSPA8;HSP90AA1;HSP90AB1;TFDP1;ARPC2;UHRF1;TIMM23;ANP32B;EEF2;HSPE1;COX5A;HSPD1
renal cell carcinoma DOID-4450 human GSE38424 sample 664	9/298	0.58477	1	0	0	0.969545	0.520197	SEPT9;CCND3;SYT11;IDH1;UROS;SLC39A11;CCDC6;COMMD1;RAI14
endometrial cancer DOID-1380 human GSE17025 sample 846	9/298	0.58477	1	0	0	0.969545	0.520197	EEF1A1;EGR1;GJA1;TSC22D1;RPSA;MALAT1;SGK1;BCAT1;SRSF11
cervical cancer DOID-4362 human GSE9750 sample 619	8/265	0.585796	1	0	0	0.969139	0.51828	GJA1;SPARC;TSC22D1;AHNAK;GSTA4;AUTS2;PALLD;SGK1
Nicotine addiction C0028043 human GSE11208 sample 325	15/497	0.586922	1	0	0	0.968895	0.516289	LYPLA1;HSP90AA1;CTBP2;UHRF1;IL17RD;RTN4;HSPD1;ARPC2;TRIM28;MXI1;TRIP12;ANP32B;EIF3A;YWHAG;MCM2
acute myocardial infarction DOID-9408 mouse GSE775 sample 1005	5/166	0.59292	1	0	0	0.96695	0.505421	TRIM28;TIMM23;SORBS1;ACSS1;GGTA1
Type 1 diabetes mellitus C0011854 mouse GSE2254 sample 204	6/200	0.594466	1	0	0	0.963082	0.50089	MACF1;DDC;DSTN;MYH9;TOP1;EPN1
fragile X syndrome DOID-14261 human GSE7329 sample 515	9/301	0.596816	1	0	0	0.959882	0.49544	DDC;PALLD;STARD8;TRPS1;PECAM1;IGF2BP1;TSPAN5;ANK3;SIPA1L2
schizophrenia DOID-5419 human GSE17612 sample 852	8/268	0.598536	1	0	0	0.95829	0.491861	EGR1;NTRK2;PCDHGA12;ANXA6;ACTN4;MAPT;SGK1;YWHAG
endometrial cancer DOID-1380 human GSE17025 sample 840	9/302	0.600794	1	0	0	0.956704	0.487444	EGR1;GJA1;SPARC;TSC22D1;SLTM;RPSA;MALAT1;SGK1;BCAT1
MS (Multiple Sclerosis) C0026769 human GSE10064 sample 377	10/336	0.603115	1	0	0	0.955438	0.483116	HSPA8;GLT1D1;TENM4;TESC;DSTN;EIF3H;COMMD1;EEF2;COX5A;ARHGAP23
dilated cardiomyopathy DOID-12930 human GSE42955 sample 678	9/303	0.604753	1	0	0	0.953546	0.479573	ICK;EPHA4;RPS6KA2;ZMAT4;SLCO2A1;NMNAT2;SLC25A12;PLEKHA7;ATF4
melanoma DOID-1909 human GSE6887 sample 948	10/337	0.606867	1	0	0	0.952603	0.475774	PPP4R1;IGSF3;TENM4;RICTOR;SLC2A3;DDX60;BCAT1;PLXDC1;JAM2;TTN
acute myeloid leukemia DOID-9119 human GSE9476 sample 782	13/437	0.606883	1	0	0	0.955001	0.476945	TGIF1;PFKFB3;SGMS1;AUTS2;IQSEC1;SLC2A3;SORL1;TIAM1;ABLIM1;RAB31;PRKD3;MXI1;SGK1
intracranial aneurysm DOID-10941 human GSE26969 sample 744	13/437	0.606883	1	0	0	0.955001	0.476945	TCERG1;HSP90AA1;HSP90AB1;ANP32A;FNBP1;ITPR1;DSTN;SORBS1;EEF2;METTL23;SLTM;COX1;DENND6A
Cardiomyopathy C0878544 human GSE1869 sample 79	8/270	0.60692	1	0	0	0.951192	0.474986	GRAMD1B;PALLD;TRIM16;TEX2;YWHAZ;SH3GL2;RTN4;ATF4
Duchenne muscular dystrophy DOID-11723 human GSE6011 sample 674	7/237	0.609811	1	0	0	0.948182	0.468977	HSP90AA1;PPM1B;PFKFB3;TACC2;RAF1;SLC25A12;COX5A
HIV - Human immunodeficiency virus infection C0019693 human GSE2504 sample 157	6/204	0.61373	1	0	0	0.944198	0.460957	EEF1A1;HSP90AA1;HSP90AB1;PDGFC;FAM53B;RPSA
pancreatitis DOID-4989 mouse GSE3644 sample 513	7/238	0.61423	1	0	0	0.944198	0.460189	SPARC;CCPG1;ST5;RPSA;SGK1;GGTA1;TMEM131
thymic carcinoma DOID-3284 mouse GSE2501 sample 985	10/339	0.614319	1	0	0	0.946983	0.46141	EEF1A1;ANKRD28;SEPT9;CCND3;ERDR1;EPC1;MYH9;ANP32B;TOP1;YWHAZ
idiopathic pulmonary fibrosis DOID-0050156 human GSE24206 sample 867	9/307	0.620391	1	0	0	0.941122	0.449296	EGR1;GLT1D1;PFKFB3;RPS6KA2;PDE4D;SLC2A3;IRAK3;TACC2;CCDC141
cerebral palsy DOID-1969 human GSE11686 sample 913	9/308	0.624251	1	0	0	0.938067	0.44202	HSPA8;DEPTOR;PFKFB3;TSC22D1;RPSA;ENO1;EEF2;SLC25A12;COX5A
Cystic Fibrosis C0010674 mouse GSE769 sample 428	8/275	0.627481	1	0	0	0.933898	0.435235	CCND3;SPARC;AHNAK;FN1;IGF2BP2;JARID2;EEF2;YWHAZ
Oligodendroglioma C0028945 human GSE4290 sample 251	10/343	0.629009	1	0	0	0.93594	0.433911	RAP1GAP2;CX3CR1;MAP2K1;SYT11;ERC2;YWHAZ;SYN1;SH3GL2;YWHAG;MAP4K4
anaplastic thyroid carcinoma UMLS CUI-C0238461 human GSE65144 sample 654	8/276	0.631523	1	0	0	0.930514	0.427683	EEF1A1;EGR1;GJA1;DEPTOR;KIT;DSTN;CTNNAL1;PNRC1
bipolar disorder DOID-3312 human GSE12679 sample 544	8/276	0.631523	1	0	0	0.930514	0.427683	NSF;RAP1GAP2;GRAMD1B;HSPA8;ANXA6;FAM189A1;EEF2;ERC2
Lewy body dementia DOID-12217 human GSE49036 sample 1067	7/242	0.631632	1	0	0	0.928591	0.42664	EGR1;KCNJ6;ST5;DENND2A;ANXA6;FAM189A1;KANK4
Williams-Beuren syndrome DOID-1928 human GSE16715 sample 903	9/310	0.631907	1	0	0	0.932015	0.427806	PCDHGA8;DEPTOR;SH3PXD2A;SLTM;CCPG1;ZMAT4;TRPS1;SGK1;SRSF11
Essential Thrombocytemia C0040028 human GSE2006 sample 434	5/174	0.634458	1	0	0	0.922492	0.419719	EEF1A1;SPARC;RAB31;STARD8;NUDT3
Hypertrophy, Left Ventricular C0149721 mouse GSE2459 sample 382	9/311	0.635704	1	0	0	0.929018	0.420865	TGIF1;TIMM23;DSTN;IL6RA;TRIP12;RAF1;POU2F3;NUDT3;SRPK1
endometrial cancer DOID-1380 human GSE17025 sample 839	9/311	0.635704	1	0	0	0.929018	0.420865	EGR1;GJA1;TSC22D1;SLTM;RPSA;SGK1;EEF2;BCAT1;SRSF11
Aplastic anaemia C0002874 human GSE3807 sample 424	10/346	0.639833	1	0	0	0.927825	0.414319	EEF1A1;CCND3;MAP2K1;PFKFB3;HSP90AB1;EIF3H;ANP32B;SGK1;TNS3;PNRC1
nemaline myopathy DOID-3191 mouse GSE3384 sample 970	6/210	0.641643	1	0	0	0.917221	0.406992	ANKRD28;HSPA8;TIMM23;IGF2BP2;SGK1;TEX2
Leukemia, Chronic T-Cell C2363142 human GSE5788 sample 74	9/313	0.643234	1	0	0	0.923082	0.407307	EEF1A1;CX3CR1;ABLIM1;ARHGEF3;WAC;TRIP12;TAB2;LITAF;PNRC1
endometriosis of ovary DOID-11432 human GSE7305 sample 939	8/279	0.643503	1	0	0	0.920508	0.405787	EEF1A1;GJA1;PFKFB3;REV3L;COX1;RPSA;RHPN2;TYMS
familial hypercholesterolemia DOID-13810 human GSE6088 sample 907	8/279	0.643503	1	0	0	0.920508	0.405787	CX3CR1;HSPA8;HSP90AA1;HSP90AB1;ARPC2;YWHAZ;SORL1;PNRC1
Polymyositis C0085655 human GSE3112 sample 227	8/279	0.643503	1	0	0	0.920508	0.405787	HSPA8;TSC22D1;SORBS1;EEF2;SLC25A12;COX5A;RTN4;ATF4
progressive myoclonus epilepsy DOID-891 mouse GSE47516 sample 516	4/141	0.643887	1	0	0	0.910716	0.400926	PDE4D;AGO2;NMNAT2;XKR6
polycystic ovary syndrome DOID-11612 human GSE10946 sample 825	8/280	0.647447	1	0	0	0.917221	0.398733	GUCY1A2;KANSL1;PALLD;ANXA6;MYO18A;ACTN4;PLEKHA7;MCM2
Hypoxia C0242184 human GSE4630 sample 250	10/349	0.650485	1	0	0	0.919849	0.395569	HSPA8;HSP90AA1;SPARC;HSP90AB1;TRIM28;ARPC2;ANP32B;EEF2;COX5A;HSPD1
Smoldering multiple myeloma C1531608 human GSE5900 sample 404	6/212	0.650675	1	0	0	0.908568	0.390452	EEF1A1;LASP1;COX1;SGK1;CDYL2;YWHAG
melanoma DOID-1909 human GSE6887 sample 949	9/315	0.650677	1	0	0	0.917221	0.394169	EXT1;EXOSC5;KAT6B;PDGFC;LNPEP;TBL1X;SIPA1L2;DDX60;BICD1
Obesity C0028754 rat GSE1813 sample 15	8/281	0.651365	1	0	0	0.913957	0.391799	EEF1A1;PCDHGA1;FN1;RPSA;ARHGAP17;EEF2;YWHAZ;KLF3
colon cancer DOID-219 mouse GSE63032 sample 662	9/317	0.658031	1	0	0	0.911434	0.381438	CDH4;DEPTOR;GSTA4;PHKG1;PALLD;SMYD1;JARID2;SLC25A12;CUEDC1
Fracture of femur C0015802 rat GSE1371 sample 278	7/249	0.660991	1	0	0	0.902486	0.373643	HSPA8;CCND3;CELF1;AGO2;COX1;RPSA;COX5A
neurofibromatosis DOID-8712 mouse GSE1482 sample 666	9/318	0.661675	1	0	0	0.908568	0.375221	MACF1;GJA1;CFDP1;XPNPEP1;USP10;AGO2;DSTN;MAPT;SPTAN1
Bacterial Infection C0004623 human GSE3026 sample 322	6/215	0.66396	1	0	0	0.89589	0.366897	EEF1A1;HSPA8;HSP90AA1;ARPC2;LITAF;MID1
acute myeloid leukemia DOID-9119 human GSE9476 sample 783	13/455	0.664084	1	0	0	0.917221	0.375461	SPARC;AUTS2;LIMK2;LITAF;SORL1;ADAM19;TIAM1;PPP4R1;ULK1;SGK1;RAF1;MPZL1;CCNJL
pancreatic cancer DOID-1793 human GSE23952 sample 798	8/286	0.670577	1	0	0	0.897978	0.358847	RAP1GAP2;CEMIP;SMAD3;LNPEP;SORBS1;DDX60;CTNNAL1;LGR4
Hereditary gingival fibromatosis C0399440 human GSE4250 sample 177	9/321	0.67247	1	0	0	0.900077	0.357148	EGR1;HSPA8;RAB31;DSTN;ENO1;TRIM16;YWHAZ;YWHAG;FAM129B
cellular phase chronic idiopathic myelofibrosis 8106 human GSE3410 sample 460	6/218	0.676924	1	0	0	0.883561	0.344763	AKAP12;EEF1A1;HSPA8;TFDP1;TYMS;MCM2
Nemaline Myopathy C0206157 mouse GSE3384 sample 160	9/324	0.683058	1	0	0	0.891742	0.33991	EEF1A1;SPARC;ERDR1;AHNAK;CLTC;DSTN;SGK1;ACSS1;PNRC1
amyotrophic lateral sclerosis DOID-332 mouse GSE3343 sample 683	9/325	0.686541	1	0	0	0.888999	0.334343	NSF;DSTN;TACC2;PAIP2;SPPL3;SYN1;PLEKHA7;WDTC1;STRN3
Actinic keratosis C0022602 human GSE2503 sample 350	12/429	0.688676	1	0	0	0.897978	0.334932	EEF1A1;HSP90AB1;GSTA4;IDH1;HSPB8;EIF3H;RPSA;EEF2;COX5A;RTN4;TTN;HSPD1
methylmalonic acidemia DOID-14749 mouse GSE41044 sample 476	7/256	0.68889	1	0	0	0.877809	0.327136	CEACAM2;ST8SIA1;GM5820;ELOVL6;FGF1;BCAT1;ETV5
Cardiomyopathy, Dilated C0007193 human GSE9800 sample 115	8/291	0.689137	1	0	0	0.882549	0.328587	CDH4;DPP6;TRIM28;LUZP1;DENND5B;SRGAP3;BRD4;ASIC1
schizophrenia DOID-5419 human GSE17612 sample 853	8/291	0.689137	1	0	0	0.882549	0.328587	RAP1GAP2;EGR1;PCDHGA11;LASP1;SPARC;RPSA;YWHAZ;RTN4
Cardiomyopathy, Dilated C0007193 human GSE3586 sample 323	4/150	0.691166	1	0	0	0.856073	0.316212	ARFIP1;MALAT1;PLEKHA7;ATF4
prostate cancer DOID-10283 human GSE39452 sample 485	10/361	0.691291	1	0	0	0.889272	0.328315	ATF1;LYPLA1;PFKFB3;CDCA3;UHRF1;CHEK1;DLEU2;DENND6A;TYMS;MCM2
Acne C0702166 human GSE10432 sample 297	8/292	0.692769	1	0	0	0.879527	0.322838	COIL;SPARC;SH3PXD2A;CHEK1;ACSL6;MRPS31;LIFR;SNTB2
Intestinal metaplasia of gastric mucosa C0267187 human GSE2669 sample 349	8/292	0.692769	1	0	0	0.879527	0.322838	ADAM19;TRIM28;GSTA4;ULK1;LIFR;PATZ1;SH3GL2;ATF4
Ulcerative Colitis C0009324 human GSE1710 sample 264	11/397	0.696002	1	0	0	0.889496	0.322356	PLEKHG1;UBXN2A;NSMCE2;ALDH16A1;RICTOR;FOXN3;IGF2BP2;RBPJ;FGF1;SIPA1L3;GATAD2A
Hypoxia C0242184 mouse GSE3195 sample 70	9/328	0.696847	1	0	0	0.880868	0.31816	AKAP12;EEF1A1;HSPA8;SEPT9;TSC22D1;TIMM23;ANP32B;COX5A;HSPD1
Huntington's disease DOID-12858 mouse GSE19780 sample 527	8/294	0.699952	1	0	0	0.873544	0.311631	ZZZ3;ERDR1;GNG7;AGO2;SLC39A11;FGF1;YWHAZ;ZSWIM3
esophagus squamous cell carcinoma DOID-3748 human GSE20347 sample 607	9/329	0.700235	1	0	0	0.87819	0.312933	ABLIM1;UBL3;AHNAK;WWC1;HSPB8;CCDC6;ELOVL6;CTNNAL1;LGR4
COPD - Chronic obstructive pulmonary disease C0024117 human GSE1650 sample 36	5/188	0.700577	1	0	0	0.853796	0.303824	EGR1;AHNAK;PECAM1;SGK1;ATF4
nemaline myopathy DOID-3191 mouse GSE3384 sample 973	5/188	0.700577	1	0	0	0.853796	0.303824	ERDR1;SGK1;NUDT3;RTN4;PNRC1
Acute pancreatitis C0001339 mouse GSE3644 sample 376	5/188	0.700577	1	0	0	0.853796	0.303824	SPARC;CCPG1;SGK1;TMEM131;GGTA1
atopic dermatitis DOID-3310 human GSE32924 sample 857	9/330	0.703599	1	0	0	0.875529	0.307789	SPEN;UBL3;AHNAK;PDGFC;TSPAN5;MALAT1;ARIH1;TOP1;KANK4
autism spectrum disorder DOID-0060041 human GSE25507 sample 1026	9/330	0.703599	1	0	0	0.875529	0.307789	RAB31;ANP32A;UBE2R2;RAB27A;SLC2A3;IQGAP1;LITAF;SORL1;PNRC1
Neurological pain disorder C0423704 rat GSE18803 sample 212	5/189	0.704967	1	0	0	0.849279	0.296912	GSTA4;EPB41L1;CRTAC1;CTNNAL1;PKNOX2
Streptococcal tonsillitis C0275804 mouse GSE11494 sample 263	11/400	0.705236	1	0	0	0.882825	0.308303	EEF1A1;HSP90AA1;SPARC;SLC39A11;TIMM23;DSTN;ELL2;COX5A;YWHAZ;ATF4;HSPD1
RA (rheumatoid arthritis) C0003873 human GSE3592 sample 183	9/332	0.710255	1	0	0	0.870255	0.297742	EEF1A1;NRP2;HSP90AB1;ARPC2;FNBP1;DNAJA2;ARFIP1;FOXN3;EIF3A
autism spectrum disorder DOID-0060041 human GSE25507 sample 1029	8/297	0.710523	1	0	0	0.86472	0.295521	HSPA8;HSP90AA1;AIM2;ARPC2;LIMK2;COX1;TYMS;LITAF
acute myocardial infarction DOID-9408 mouse GSE775 sample 1003	8/297	0.710523	1	0	0	0.86472	0.295521	GJA1;TSC22D1;HSPB8;QK;PAIP2;HSPE1;PAFAH1B1;HSPD1
psoriasis DOID-8893 human GSE32407 sample 836	7/263	0.715275	1	0	0	0.854445	0.286315	FHOD3;CX3CR1;ALDH1L1;LIFR;MDM4;ROR2;MAPK14
Colitis C0009319 mouse GSE2172 sample 401	9/334	0.716814	1	0	0	0.865044	0.288007	DDC;HSP90AB1;TRIM28;SLC44A1;UBE2R2;SP3;SGK1;EEF2;EPN1
idiopathic pulmonary fibrosis DOID-0050156 human GSE24206 sample 869	5/192	0.717866	1	0	0	0.836009	0.277114	PFKFB3;NCOA3;LIFR;CCDC141;PTPRG
Infection by Aspergillus fumigatus C0276655 human GSE6965 sample 386	8/300	0.720848	1	0	0	0.856073	0.280216	EPS8;EGR1;SPARC;PPP1R12A;PDGFA;MALAT1;MAP4K3;TTC39B
sickle cell anemia DOID-10923 human GSE11524 sample 481	6/229	0.721646	1	0	0	0.84112	0.274391	EEF1A1;CX3CR1;EIF3H;RPSA;IFT46;SORL1
Essential Hypertension C0085580 rat GSE1675 sample 412	8/301	0.724234	1	0	0	0.853229	0.275286	HSPA8;SPARC;STK24;MYH9;COX1;HSPE1;LITAF;COX5A
Dengue Fever DOID-12206 human GSE51808 sample 447	7/266	0.72611	1	0	0	0.844809	0.270384	PLEKHG1;KIT;MXI1;TSPAN5;SGK1;TOPORS;CCNJL
schizophrenia DOID-5419 human GSE62191 sample 545	9/337	0.726469	1	0	0	0.857343	0.273972	RAP1GAP2;HSPA8;ANP32A;TSACC;EBF1;FN1;SLC2A3;CNNM2;ETV5
Anaplasmosis C0002797 human GSE2600 sample 21	10/373	0.729056	1	0	0	0.860663	0.271974	METTL23;EGR1;LYPLA1;ANXA6;COX1;ENO1;TYMS;PAIP2;EEF2;COX5A
skin squamous cell carcinoma DOID-3151 human GSE2503 sample 627	10/373	0.729056	1	0	0	0.860663	0.271974	EEF1A1;GSTA4;IDH1;HSPB8;EIF3H;RPSA;EEF2;COX5A;RTN4;TTN
Huntington's disease DOID-12858 mouse GSE5786 sample 721	6/231	0.729296	1	0	0	0.833837	0.263223	EEF1A1;ERDR1;GNG7;DSTN;COX5A;SORL1
lung large cell carcinoma DOID-4556 human GSE51852 sample 732	10/374	0.732061	1	0	0	0.858362	0.267716	CX3CR1;EGR1;CRTAC1;HSPB8;DENND2A;KIT;ANXA6;JAM2;SH3GL2;PKNOX2
acute myocardial infarction DOID-9408 human GSE48060 sample 510	9/339	0.732784	1	0	0	0.852285	0.264979	EPS8;CX3CR1;GK5;SPARC;YES1;FMNL2;ATAD5;ELOVL6;CTNNAL1
Endometriosis C0014175 human GSE6364 sample 393	9/341	0.739001	1	0	0	0.847286	0.256267	EPS8;EEF1A1;SEPT9;PCDHGA12;STK24;RPSA;MALAT1;EEF2;PNRC1
peripartum cardiomyopathy DOID-9997 human GSE42955 sample 817	9/342	0.742072	1	0	0	0.844809	0.252014	ICK;EPHA4;RPS6KA2;ZMAT4;SLCO2A1;SLC2A3;NMNAT2;PLEKHA7;ATF4
idiopathic pulmonary fibrosis DOID-0050156 human GSE24206 sample 868	7/271	0.743535	1	0	0	0.829222	0.245731	EGR1;GLT1D1;PFKFB3;LIFR;SLC2A3;IRAK3;PTPRG
polycystic ovary syndrome DOID-11612 human GSE48301 sample 818	10/378	0.743861	1	0	0	0.849279	0.251303	NSF;SPARC;VWF;EBF1;FN1;SLC39A11;PECAM1;SLC2A3;ENO1;IFT46
asthma DOID-2841 human GSE27011 sample 568	8/307	0.743972	1	0	0	0.836553	0.247412	EPS8;EGR1;EPB41L4A;TFDP1;MXI1;TSPAN5;IGF2BP2;TNS1
Huntington's disease DOID-12858 mouse GSE19780 sample 528	7/272	0.746924	1	0	0	0.826173	0.24107	SPEN;ERDR1;GALNT2;AGO2;DAB2IP;FGF1;PLXDC1
Type 2 diabetes mellitus C0011860 mouse GSE2899 sample 279	8/308	0.747165	1	0	0	0.833837	0.243038	NCOR2;SEPT9;GJA1;TSC22D1;CLTC;MYH9;SGK1;RTN4
Psoriasis vulgaris C0263361 human GSE14905 sample 93	6/236	0.74777	1	0	0	0.816171	0.237229	EGR1;PFKFB3;PDGFC;MALAT1;SLC2A3;KANK4
Obesity C0028754 mouse GSE4692 sample 319	8/309	0.75033	1	0	0	0.831139	0.238738	SRRM2;HSP90AB1;EIF3H;HSPE1;COX5A;YWHAZ;SORL1;ZBTB7C
Psoriasis vulgaris C0263361 human GSE6710 sample 444	8/310	0.753467	1	0	0	0.828458	0.234512	TSC22D1;AHNAK;PDGFC;KIT;FN1;EIF3H;ANP32B;RBPJ
Insulin Resistance DOID-9352 human GSE36297 sample 581	8/310	0.753467	1	0	0	0.828458	0.234512	ENAH;RABGEF1;HSP90AA1;HSP90AB1;TSC22D1;TPM3;MXI1;COX5A
colon adenoma DOID-0050912 human GSE4183 sample 550	7/274	0.753608	1	0	0	0.820143	0.232004	AHCYL2;LASP1;MXI1;FN1;MALAT1;SGK1;COX5A
autism spectrum disorder DOID-0060041 human GSE25507 sample 1032	9/347	0.757058	1	0	0	0.832636	0.231735	CCND3;SPARC;MXI1;PECAM1;NOSIP;MYH9;EIF3H;EEF2;SORL1
Teratospermia UMLS CUI-C0919628 human GSE6968 sample 954	7/276	0.760165	1	0	0	0.8142	0.223269	GLT1D1;UBE2R2;WAC;CUL1;SCAP;ENO1;ACSS1
Malignant mesothelioma of pleura C0812413 human GSE2549 sample 118	5/203	0.761704	1	0	0	0.790708	0.215228	EEF1A1;EGR1;PECAM1;ACACB;ATF4
systemic juvenile idiopathic arthritis (sJIA) (subgroup-extended oligo) DOID-848 human GSE21521 sample 576	6/240	0.761881	1	0	0	0.802568	0.218271	CX3CR1;YES1;BNC2;NUDT3;TOPORS;TNFRSF21
non-systemic juvenile idiopathic arthritis (sJIA) (subgroup-RF+ polyarthritis) DOID-848 human GSE21521 sample 579	6/241	0.765316	1	0	0	0.799238	0.213769	CX3CR1;KANSL1;ANK3;TYMS;ZSWIM3;BMPR1A
Influenza C0021400 mouse GSE3203 sample 85	6/241	0.765316	1	0	0	0.799238	0.213769	FMNL2;TSC22D1;CCPG1;PIEZO1;LIFR;SGK1
autism spectrum disorder DOID-0060041 human GSE7329 sample 1033	7/279	0.769764	1	0	0	0.805445	0.210762	DDC;SGMS1;STARD8;TRPS1;PECAM1;IGF2BP1;SIPA1L2
pancreatic non-invasive intraductal papillary-mucinous carcinoma DOID-7685 human GSE19650 sample 609	7/280	0.7729	1	0	0	0.802568	0.206746	EGR1;GJA1;SPARC;PALLD;PDGFC;FN1;RTN4
Crohn's disease DOID-8778 human GSE1710 sample 992	12/461	0.77634	1	0	0	0.835646	0.211556	GSK3B;PFKFB3;LUZP1;NSMCE2;PECAM1;ALDH16A1;FOXN3;IGF2BP2;RBPJ;LITAF;SIPA1L3;GATAD2A
Non-syndromic cleft lip and palate DOID-9296 human GSE42589 sample 618	11/426	0.777759	1	0	0	0.828944	0.208346	RNF168;ADAM19;CASP8AP2;ATAD5;ANP32A;PAPD5;NSMCE2;LAMC2;DLEU2;SIPA1L3;ETV5
prostate cancer DOID-10283 human GSE30174 sample 866	4/170	0.779734	1	0	0	0.755358	0.187935	CCND3;LASP1;EEF2;LITAF
asthma DOID-2841 human GSE27011 sample 565	5/208	0.779855	1	0	0	0.7717	0.191881	EGR1;IGF2BP2;SIPA1L2;CTNNAL1;IGF1R
Barrett's esophagus DOID-9206 human GSE13083 sample 917	6/246	0.781944	1	0	0	0.782993	0.192594	TIAM1;RAB31;AHNAK;HSPB8;TRPS1;SGK1
sickle-cell anemia DOID-10923 human GSE16728 sample 505	4/171	0.783579	1	0	0	0.750941	0.183142	GLT1D1;MYH9;COX1;CCNJL
Asthma C0004096 human GSE4302 sample 318	9/357	0.78518	1	0	0	0.809312	0.195726	FHOD3;EGR1;HSPA8;SGMS1;C1GALT1;SLCO2A1;FN1;DLEU2;TNS3
ulcerative colitis DOID-8577 human GSE37283 sample 594	11/429	0.785248	1	0	0	0.823147	0.199	RCAN1;MYO1E;EGR1;RAB31;TIMM23;ELOVL6;DLEU2;TRIM16;RHPN2;CTNNAL1;RAI14
Type 1 diabetes mellitus C0011854 mouse GSE11 sample 173	8/321	0.786146	1	0	0	0.800068	0.192506	MOV10;AHNAK;ARPC2;ANXA6;MYH9;DCAF4;YWHAZ;RELB
schizophrenia DOID-5419 human GSE21935 sample 854	7/286	0.79106	1	0	0	0.785731	0.18416	PCDHGA8;HSPA8;SPARC;HSPB8;ANXA6;COX1;COX5A
Erectile dysfunction associated with type 2 diabetes mellitus C1997651 rat GSE2457 sample 186	6/249	0.791486	1	0	0	0.77356	0.180892	SPARC;PFKFB3;FN1;TIMM23;SGK1;RTN4
Wolfram syndrome UMLS CUI-C0043207 mouse GSE15293 sample 694	8/324	0.794482	1	0	0	0.79266	0.182364	EGR1;HSPA8;PGAP1;KCNT2;ARPC2;DENND5B;SHB;SGK1
autism spectrum disorder DOID-0060041 human GSE25507 sample 1027	8/324	0.794482	1	0	0	0.79266	0.182364	RAB31;PECAM1;RBPJ;JARID2;DDX60;LITAF;SORL1;NUDT3
Bipolar Disorder C0005586 human GSE7036 sample 181	7/288	0.796865	1	0	0	0.780275	0.177177	EEF1A1;HSP90AA1;ANXA6;MYH9;ANP32B;COX5A;YWHAG
cerebral palsy DOID-1969 human GSE31243 sample 878	7/288	0.796865	1	0	0	0.780275	0.177177	PFKFB3;HSP90AB1;ANXA6;EEF2;SLC25A12;RTN4;TTN
Type 1 diabetes mellitus C0011854 human GSE10586 sample 9	5/213	0.796924	1	0	0	0.753585	0.171061	KIT;TSPAN5;COX1;ZSWIM3;ENOX1
Barrett's esophagus DOID-9206 human GSE34619 sample 596	7/289	0.799722	1	0	0	0.777575	0.173781	TIAM1;DENND2C;PPP2R2C;HSPB8;BTBD11;ELL2;FAM129B
non-systemic juvenile idiopathic arthritis (sJIA) (subgroup-oligoarticular) DOID-848 human GSE21521 sample 577	6/252	0.800705	1	0	0	0.764351	0.169887	CX3CR1;KANSL1;ZMAT4;ANK3;TNFRSF21;BMPR1A
prostate cancer DOID-10283 human GSE26910 sample 603	7/290	0.802548	1	0	0	0.774893	0.170449	KCNT2;ST8SIA1;ANKRD45;GLIS3;ALPK3;TRIM16;KANK4
facioscapulohumeral muscular dystrophy DOID-11727 human GSE15090 sample 541	11/438	0.806629	1	0	0	0.806233	0.173252	TPM3;PALLD;HSPB8;MYO18A;ALPK3;EEF2;SGK1;HSPE1;COX5A;YWHAG;ATF4
Cancer of the Stomach C0024623 human GSE2685 sample 361	6/254	0.806674	1	0	0	0.758332	0.162917	LASP1;ABLIM1;AHNAK;TLN2;YWHAZ;ATF4
multiple sclerosis DOID-2377 human GSE26484 sample 742	8/329	0.807832	1	0	0	0.780613	0.166584	CDK17;HSPA8;HSP90AA1;STK24;EIF3H;RPSA;DDX60;YWHAG
juvenile dermatomyositis UMLS CUI-C0263666 human GSE11971 sample 772	2/97	0.809445	1	0	0	0.661912	0.139933	COX5A;TTN
Breast Cancer C0006142 rat GSE1872 sample 63	9/367	0.810859	1	0	0	0.78726	0.165057	ABLIM1;SPARC;HSP90AB1;AHNAK;FN1;ANXA6;EEF2;RTN4;TNS1
Rhinovirus infection C0276447 human GSE11348 sample 324	6/256	0.812503	1	0	0	0.752408	0.156227	ABLIM1;GSTA4;BCAT1;HSPE1;RTN4;YWHAG
large cell neuroendocrine carcinoma DOID-0050872 human GSE51852 sample 733	7/294	0.813547	1	0	0	0.764351	0.157725	CX3CR1;STARD8;HSPB8;ANXA6;SLC2A3;JAM2;PKNOX2
Down syndrome DOID-14250 human GSE42956 sample 1061	7/294	0.813547	1	0	0	0.764351	0.157725	GK5;EGR1;NCOR1;PKP4;MDM4;SOS1;FGFR2
Down Syndrome C0013080 human GSE5390 sample 277	3/140	0.815681	1	0	0	0.687916	0.14015	EGR1;TESC;ATF4
Bacterial Infection C0004623 mouse GSE6435 sample 133	6/258	0.818194	1	0	0	0.746575	0.149805	BCAS3;LYPLA1;CHEK1;ACTN4;EEF2;RAI14
colon cancer DOID-219 human GSE34299 sample 502	7/296	0.818867	1	0	0	0.759186	0.151711	DYX1C1;DENND5B;ST5;TESC;KIT;FAM189A1;PLEKHA7
Urothelial carcinoma in situ C0334267 human GSE3167 sample 229	5/220	0.819053	1	0	0	0.729607	0.145635	EEF1A1;ARVCF;HSP90AB1;EEF2;ATF4
bipolar disorder DOID-3312 human GSE12679 sample 770	5/220	0.819053	1	0	0	0.729607	0.145635	RAP1GAP2;GRAMD1B;ANXA6;FAM189A1;MALAT1
autism spectrum disorder DOID-0060041 human GSE25507 sample 1022	8/334	0.820515	1	0	0	0.768928	0.152111	GLT1D1;RAB31;PECAM1;SLC2A3;ACTN4;IQGAP1;LITAF;SORL1
atherosclerosis DOID-1936 mouse GSE19286 sample 906	6/259	0.820988	1	0	0	0.743693	0.146691	AKAP12;DDC;IDH1;DSTN;RPSA;MALAT1
nemaline myopathy DOID-3191 mouse GSE3384 sample 977	5/221	0.82205	1	0	0	0.726306	0.142323	UBL3;TIMM23;TAB2;SGK1;WDTC1
type 1 diabetes mellitus 9744 rat GSE4990 sample 474	9/373	0.825119	1	0	0	0.774597	0.148898	EGR1;HSP90AB1;TIMM23;IRAK3;YWHAZ;YWHAG;PNRC1;ATF4;PAFAH1B1
Small cell carcinoma of lung C0149925 human GSE1037 sample 362	9/373	0.825119	1	0	0	0.774597	0.148898	EGR1;RAB31;MAML2;AHNAK;VWF;PECAM1;TACC1;SORBS1;SGK1
Familial combined hyperlipidaemia C0020474 human GSE1010 sample 137	9/374	0.827414	1	0	0	0.772526	0.146355	DARS;NASP;ARPC2;TNIP1;ANXA6;RPSA;ANP32B;RTN4;ATF4
monoclonal gammopathy of uncertain significance DOID-7442 human GSE47552 sample 563	7/300	0.829151	1	0	0	0.749064	0.140339	AKAP12;TIAM1;EGR1;DENND5B;FN1;MRPS31;ACSS1
Down Syndrome C0013080 human GSE10758 sample 310	5/224	0.830803	1	0	0	0.716579	0.132827	RIMS2;EGR1;GJA1;DDC;MCC
asthma DOID-2841 human GSE27011 sample 567	6/263	0.831825	1	0	0	0.732382	0.134856	EPS8;EGR1;DENND2C;TSPAN5;SGK1;DDX60
autism spectrum disorder DOID-0060041 human GSE25507 sample 1028	8/339	0.832544	1	0	0	0.757587	0.138842	GLT1D1;RAB31;TNIP1;PECAM1;MYH9;ARHGAP17;ACTN4;EEF2
nemaline myopathy DOID-3191 mouse GSE3384 sample 976	11/450	0.832644	1	0	0	0.784733	0.143723	EEF1A1;HSPA8;SPARC;AHNAK;CLTC;TIMM23;DSTN;ACSS1;SGK1;HSPE1;ATF4
hepatocellular carcinoma DOID-684 human GSE58208 sample 735	3/145	0.833717	1	0	0	0.664194	0.120792	ATF1;MALAT1;MAP4K3
Breast Cancer C0006142 human GSE1379 sample 392	7/302	0.834118	1	0	0	0.744103	0.134965	CX3CR1;HSPB8;ARHGEF3;IFT80;NCAM1;PTPRK;CDC14A
autism spectrum disorder DOID-0060041 human GSE28521 sample 1039	6/264	0.83445	1	0	0	0.729607	0.132046	VWF;KIT;ITPR1;ULK1;SRSF11;RAI14
osteoarthritis DOID-8398 rat GSE8077 sample 943	5/226	0.836441	1	0	0	0.710237	0.126848	STPG1;EGR1;GSTA4;ACSL6;EPN1
asthma DOID-2841 human GSE16032 sample 729	7/303	0.836559	1	0	0	0.741647	0.132353	EGR1;LYPLA1;CCND3;MAP2K1;SPARC;RAB31;COX1
Cancer of the testis C0153594 human GSE1818 sample 246	11/452	0.836708	1	0	0	0.781261	0.139283	HIP1;ACSL6;DYM;TEX14;MDM4;TRIP12;SORBS1;HIPK1;TEX2;LYZL4;JAM2
glaucoma associated with systemic syndromes DOID-1686 mouse GSE26299 sample 491	8/341	0.837176	1	0	0	0.753143	0.133849	PALM2;EBF1;FGF1;MID1;SYN1;JAM2;KANK4;EPN1
facioscapulohumeral muscular dystrophy DOID-11727 human GSE15090 sample 540	5/228	0.841925	1	0	0	0.704007	0.121134	PFKFB3;MYO18A;SGK1;EEF2;RTN4
idiopathic pulmonary fibrosis DOID-0050156 human GSE24206 sample 872	6/267	0.842131	1	0	0	0.72141	0.123953	EGR1;GLT1D1;LIFR;SLC2A3;CCDC141;PTPRG
Cancer of prostate C0376358 mouse GSE1413 sample 48	7/306	0.843709	1	0	0	0.734376	0.124805	SRRM2;EEF1A1;SPARC;GSTA4;RPSA;NUDT3;TNS1
Down syndrome DOID-14250 human GSE35561 sample 1062	5/229	0.84461	1	0	0	0.700933	0.118374	EGR1;ARHGEF3;PECAM1;IRAK3;DDX60
Septic Shock C0036983 human GSE9692 sample 307	2/106	0.84676	1	0	0	0.605712	0.100753	CX3CR1;EBF1
Sjogren's syndrome DOID-12894 human GSE23117 sample 889	7/308	0.848336	1	0	0	0.729607	0.120005	HSP90AA1;ABLIM1;HSP90AB1;DSTN;SH3BP4;EEF2;ATF4
adenosquamous cell lung carcinoma DOID-4829 human GSE51852 sample 731	7/308	0.848336	1	0	0	0.729607	0.120005	GLT1D1;HSPB8;DENND2A;ANXA6;SLC2A3;AKAP2;SH3GL2
endometriosis DOID-289 human GSE6364 sample 946	9/384	0.849101	1	0	0	0.752408	0.123077	LYPLA1;IDH1;ATP2B4;DSTN;MALAT1;ANK3;SGK1;DDX60;YWHAZ
Wolfram syndrome UMLS CUI-C0043207 mouse GSE15293 sample 695	8/350	0.856784	1	0	0	0.733777	0.113419	EGR1;TSC22D1;VWF;GNG7;AGO2;MALAT1;SHB;YWHAZ
amyotrophic lateral sclerosis DOID-332 mouse GSE10953 sample 679	2/109	0.857642	1	0	0	0.589041	0.0904581	HSPA8;PLXDC1
Thymic Carcinoma C0205969 mouse GSE2501 sample 344	8/351	0.858841	1	0	0	0.731686	0.111342	ANKRD28;HSPA8;CCND3;GALNT2;EPC1;MYH9;TOP1;YWHAZ
Cardiomyopathy, Dilated C0007193 human GSE3585 sample 198	6/274	0.858932	1	0	0	0.702979	0.106899	RCAN1;TSC22D1;TPM3;IDH1;SLC2A3;SGK1
asthma DOID-2841 human GSE18965 sample 753	9/389	0.859109	1	0	0	0.742737	0.112792	CCND3;GSTA4;TNIP1;IQSEC1;IDH1;SCAP;EEF2;RAF1;TNS3
Hypertrophy, Left Ventricular C0149721 rat GSE2116 sample 248	7/313	0.859421	1	0	0	0.717952	0.108767	HSPA8;SPARC;HSP90AB1;TSC22D1;AHNAK;IQSEC1;HSPE1
Cardiac Hypertrophy C1383860 mouse GSE1621 sample 51	7/313	0.859421	1	0	0	0.717952	0.108767	FHOD3;HSPA8;TSC22D1;AHNAK;ANXA6;SMYD1;PKP4
adrenoleukodystrophy DOID-10588 human GSE34308 sample 709	5/235	0.859939	1	0	0	0.683037	0.103066	PCDHGA10;CEMIP;REV3L;ATP2B4;TNFRSF21
stomach cancer DOID-10534 human GSE49515 sample 553	8/353	0.862883	1	0	0	0.727541	0.107295	EGR1;SPARC;PFKFB3;ARL15;SLC2A3;SGK1;ELL2;FAM129B
endometriosis DOID-289 human GSE6364 sample 947	9/391	0.862961	1	0	0	0.738937	0.108909	EPS8;PCDHGA12;STK24;MXI1;SHROOM3;RPSA;EEF2;TNFRSF21;PNRC1
Retinoschisis C0152439 mouse GSE5581 sample 146	4/196	0.86336	1	0	0	0.655158	0.0962579	EEF1A1;ENO1;COX5A;NUDT3
Osteoporosis C0029456 human GSE2208 sample 163	6/277	0.865668	1	0	0	0.695366	0.100309	EGR1;SLC2A3;SGK1;MCC;LITAF;NUDT3
Lewy body dementia DOID-12217 human GSE49036 sample 1069	6/277	0.865668	1	0	0	0.695366	0.100309	RAP1GAP2;GLT1D1;KCNJ6;KCNT2;FAM189A1;KANK4
Type 2 diabetes mellitus C0011860 mouse GSE2899 sample 203	6/277	0.865668	1	0	0	0.695366	0.100309	GSTA4;TPM3;DYM;MAPT;LARP4B;SGK1
Ischemic stroke UMLS CUI-C0948008 human GSE22255 sample 856	6/277	0.865668	1	0	0	0.695366	0.100309	EPS8;HIP1;AIM2;KANSL1;MALAT1;TNFRSF21
acute myocardial infarction DOID-9408 mouse GSE775 sample 1000	3/157	0.870907	1	0	0	0.613428	0.0847877	TSPAN9;EEF2;WDTC1
idiopathic pulmonary fibrosis DOID-0050156 human GSE24206 sample 873	4/199	0.871	1	0	0	0.645281	0.089122	PFKFB3;NCOA3;LIFR;CCDC141
discoid lupus erythematosus UMLS CUI-C0024138 human GSE52471 sample 689	5/240	0.871728	1	0	0	0.668807	0.0918121	FHOD3;TCF7L1;TENM4;KIT;POU2F3
basal cell carcinoma DOID-2513 mouse GSE58894 sample 730	7/320	0.873824	1	0	0	0.702247	0.0947169	PHKG1;TESC;ZMAT4;ALPK3;HS3ST5;ACACB;TTN
cystic fibrosis DOID-1485 mouse GSE3100 sample 1055	6/281	0.874233	1	0	0	0.685468	0.0921325	EGR1;ERDR1;PDGFA;MALAT1;PTGES;ZFP462
Schizophrenia DOID-1574 human GSE12679 sample 451	6/281	0.874233	1	0	0	0.685468	0.0921325	RAP1GAP2;HSPA8;MAML2;CRTAC1;ANXA6;FAM189A1
PTSD - Post-traumatic stress disorder C0038436 human GSE860 sample 338	7/321	0.875778	1	0	0	0.70006	0.0928576	HSP90AA1;TACC1;SLC2A3;IQGAP1;EEF2;SRSF11;ATF4
Kidney disorder associated with type 2 diabetes mellitus C1720457 mouse GSE2557 sample 8	6/282	0.876302	1	0	0	0.683037	0.0901915	EEF1A1;CFDP1;ZZZ3;ARFIP1;EIF3A;HSPD1
psoriasis DOID-8893 human GSE14905 sample 754	7/322	0.877708	1	0	0	0.697885	0.0910334	EGR1;PLEKHG1;PFKFB3;ARL15;EED;ELOVL6;SLC2A3
sporadic breast cancer DOID-8029 human GSE3744 sample 979	9/400	0.879259	1	0	0	0.722311	0.0929437	FHOD3;NTRK2;EGR1;TSHZ2;KIT;EBF1;MAPT;FGF1;JAM2
Hyperlipidemia C0020473 rat GSE3512 sample 38	7/323	0.879612	1	0	0	0.695725	0.0892435	HSPA8;ALDH1L1;HSP90AA1;HSP90AB1;GSTA4;DSTN;ENO1
Huntington's disease DOID-12858 human GSE8762 sample 931	6/285	0.882337	1	0	0	0.675847	0.0846032	EPS8;NSF;LYPLA1;AIM2;SYT11;RAB27A
Alzheimer's disease DOID-10652 human GSE36980 sample 520	7/325	0.883347	1	0	0	0.691443	0.0857644	EPHA4;KCNJ6;ZMAT4;TSHZ2;ANXA6;BCAT1;SYN1
West Nile fever DOID-2366 human GSE30719 sample 874	1/68	0.884161	1	0	0	0.472099	0.0581232	GJA1
hepatocellular carcinoma DOID-684 human GSE57957 sample 660	6/286	0.884293	1	0	0	0.673484	0.0828161	EGR1;MAP2K1;RN7SK;ENO1;ANP32B;EPN1
facioscapulohumeral muscular dystrophy DOID-11727 human GSE36398 sample 672	6/286	0.884293	1	0	0	0.673484	0.0828161	KLF12;PFKFB3;SGK1;CCDC141;BICD1;KDM6A
in situ carcinoma DOID-8719 mouse GSE64756 sample 655	5/246	0.884757	1	0	0	0.652494	0.0798926	TENM3;FUT9;GT(ROSA)26SOR;GRIK3;ELOVL6
asthma DOID-2841 human GSE43696 sample 827	8/365	0.885206	1	0	0	0.703621	0.0857961	DGKG;EGR1;KCNJ6;FN1;NCOA7;RAPGEF5;PTGES;CCNJL
Eczema C0013595 human GSE6012 sample 268	3/163	0.886593	1	0	0	0.590848	0.0711201	EEF1A1;AHNAK;PNRC1
multiple myeloma DOID-9538 mouse GSE6980 sample 955	7/327	0.886985	1	0	0	0.687214	0.0824154	MACF1;MAP2K1;IQGAP1;PAIP2;ARID1B;SORL1;TSPAN32
cystic fibrosis DOID-1485 mouse GSE769 sample 1058	6/288	0.888123	1	0	0	0.668807	0.0793508	CCND3;SPARC;AHNAK;FN1;IGF2BP2;JARID2
pancreatic cancer DOID-1793 human GSE49515 sample 555	6/288	0.888123	1	0	0	0.668807	0.0793508	EGR1;BNC2;PCDHGA4;PALLD;NCAM1;KDM6A
Muscular Dystrophy C0026850 mouse GSE2507 sample 232	7/329	0.890528	1	0	0	0.683037	0.0791917	EEF1A1;ABLIM1;CAPZB;HSPB8;CLTC;ANXA6;EEF2
mental retardation DOID-1059 human GSE6575 sample 1044	3/165	0.89143	1	0	0	0.583686	0.0670818	GLT1D1;AIM2;KANSL1
asthma DOID-2841 human GSE43696 sample 828	8/369	0.891944	1	0	0	0.695994	0.0795883	FHOD3;RIMS1;DDC;PHKG1;FN1;NCOA7;RAPGEF5;TBX3
colorectal adenocarcinoma DOID-0050861 mouse GSE31106 sample 1070	7/330	0.892264	1	0	0	0.680967	0.0776255	EGR1;AHCYL2;HSP90AB1;GSTA4;DSTN;ACTN4;PAIP2
endometrial cancer DOID-1380 human GSE17025 sample 844	7/331	0.893977	1	0	0	0.67891	0.076089	EEF1A1;EGR1;GJA1;TSC22D1;RPSA;SGK1;SRSF11
psoriatic arthritis DOID-9008 human GSE61281 sample 696	5/251	0.894734	1	0	0	0.639497	0.0711304	SRRM2;CX3CR1;CREBBP;EPB41L4A;PALM2
osteoarthritis DOID-8398 human GSE16464 sample 751	8/371	0.895187	1	0	0	0.692242	0.0766467	EPS8;HSPA8;CEMIP;ARPC2;DSTN;EIF3H;EEF2;ATF4
acute myocardial infarction DOID-9408 mouse GSE775 sample 1001	6/292	0.89546	1	0	0	0.659645	0.0728362	EEF1A1;TRIM28;SORBS1;EEF2;NUDT3;EPN1
ulcerative colitis DOID-8577 human GSE11223 sample 586	5/252	0.896637	1	0	0	0.636959	0.0694945	EGR1;DDC;SETD1A;ACTN4;TYMS
systemic lupus erythematosus DOID-9074 human GSE55447 sample 1075	7/333	0.897334	1	0	0	0.674832	0.0731028	RAP1GAP2;TENM3;PPP1R12A;ITPR1;FAM53B;COMMD1;TTC39B
Fracture of femur C0015802 rat GSE1685 sample 240	3/168	0.898341	1	0	0	0.573263	0.0614573	COX1;COX5A;EPN1
Vitamin A Deficiency C0042842 rat GSE1600 sample 359	7/335	0.9006	1	0	0	0.670803	0.0702289	ALDH1L1;TSC22D1;RPSA;ENO1;HSPE1;LITAF;COX5A
cystic fibrosis DOID-1485 mouse GSE3100 sample 1056	5/255	0.90217	1	0	0	0.629465	0.0648048	EGR1;HSPA8;HSP90AB1;HSPE1;HSPD1
ulcerative colitis DOID-8577 human GSE11223 sample 585	5/255	0.90217	1	0	0	0.629465	0.0648048	EGR1;NHSL1;ST8SIA1;SETD1A;YWHAZ
colorectal cancer DOID-9256 human GSE32323 sample 552	7/336	0.9022	1	0	0	0.668807	0.0688329	TIAM1;KIT;RAB27A;FAM189A1;ELOVL6;SGK1;JAM2
ulcerative colitis DOID-8577 human GSE11223 sample 588	7/336	0.9022	1	0	0	0.668807	0.0688329	PPP1R12A;CCDC6;FBRSL1;MYH9;LGR4;FAM129B;BRD4
schizophrenia DOID-5419 human GSE27383 sample 549	6/296	0.902384	1	0	0	0.650731	0.0668401	AKAP12;FMNL2;KIT;CDC37L1;SH3BP4;TNFRSF21
schizophrenia DOID-5419 human GSE12679 sample 769	9/415	0.902879	1	0	0	0.696204	0.0711285	NSF;RAP1GAP2;SCAF8;PPM1B;PFKFB3;E2F3;SMYD3;ERC2;ZCCHC2
ulcerative colitis DOID-8577 human GSE11223 sample 587	4/214	0.903903	1	0	0	0.600051	0.0606248	SETD1A;FAT1;PIEZO1;PTGES
facioscapulohumeral muscular dystrophy DOID-11727 human GSE36398 sample 673	4/214	0.903903	1	0	0	0.600051	0.0606248	CX3CR1;ELOVL6;SGK1;BICD1
psoriasis DOID-8893 human GSE52471 sample 690	6/297	0.904052	1	0	0	0.64854	0.0654174	FHOD3;TENM4;NCAM1;SPTAN1;ACACB;RAI14
multiple myeloma DOID-9538 human GSE36474 sample 707	7/338	0.905334	1	0	0	0.664849	0.0661199	ANKRD28;EGR1;RCAN1;CDCA3;UHRF1;TYMS;MCM2
SCID - Severe combined immunodeficiency C0085110 mouse GSE3414 sample 201	6/299	0.907314	1	0	0	0.644202	0.0626591	AKAP12;EEF1A1;ERDR1;RPSA;PRRC2B;HSPD1
Atherosclerosis C0004153 mouse GSE363 sample 193	6/301	0.910481	1	0	0	0.639922	0.0600133	EEF1A1;HSP90AB1;ERDR1;TSC22D1;IDH1;HSPD1
pulmonary sarcoidosis DOID-13406 human GSE19976 sample 764	5/261	0.912468	1	0	0	0.614995	0.0563352	KCNT2;LIFR;SORBS1;CFAP43;TTN
cerebral palsy DOID-1969 human GSE11686 sample 912	4/219	0.913095	1	0	0	0.586351	0.0533086	HSPA8;PFKFB3;TPM3;COX5A
Carcinoma, Hepatocellular C0019204 human GSE6764 sample 407	6/303	0.913554	1	0	0	0.635698	0.0574755	EGR1;RCAN1;MAP2K1;SGK1;SORL1;ATF4
psoriasis DOID-8893 human GSE53431 sample 813	6/305	0.916534	1	0	0	0.631529	0.0550415	FHOD3;CELF1;GNG7;C1GALT1;ROR2;ACACB
polycystic ovary syndrome DOID-11612 human GSE10946 sample 826	6/306	0.917991	1	0	0	0.629465	0.0538621	CRADD;ST8SIA1;SLCO2A1;CCDC6;DLEU2;TRIM16
Emery-Dreifuss muscular dystrophy, autosomal dominant form DOID-11726 mouse GSE8000 sample 676	5/265	0.918793	1	0	0	0.605712	0.0513004	UBXN2A;TIMM23;ALPK3;SGK1;TNS1
pancreatic cancer DOID-1793 human GSE16515 sample 475	4/224	0.921495	1	0	0	0.573263	0.0468689	EEF1A1;GJA1;MALAT1;SGK1
psoriasis DOID-8893 human GSE13355 sample 837	6/309	0.922228	1	0	0	0.623354	0.0504685	GUCY1A2;PCDHGA6;TSACC;KANSL1;PDGFC;STRN3
Alzheimer's disease DOID-10652 human GSE36980 sample 521	3/181	0.923923	1	0	0	0.532089	0.0421024	CEMIP;BTBD11;ETV5
allergic asthma DOID-9415 human GSE41649 sample 716	5/271	0.927526	1	0	0	0.592301	0.0445616	AKAP12;CX3CR1;DEPTOR;KAT6B;PDGFC
colon cancer DOID-219 mouse GSE63032 sample 661	4/228	0.927683	1	0	0	0.563206	0.042277	VMN2R85;RPS6KA2;KIT;CCDC141
epidermolysis bullosa simplex DOID-4644 human GSE28315 sample 711	7/356	0.929874	1	0	0	0.631233	0.0458944	ITPR1;NCAM1;SORBS1;RHPN2;TNS3;SORL1;TBX3
non-systemic juvenile idiopathic arthritis (sJIA) (subgroup-RF-polyarthritis) DOID-848 human GSE21521 sample 578	5/273	0.930246	1	0	0	0.587962	0.0425136	KIT;TYMS;MCC;TNFRSF21;BMPR1A
Carcinoma in situ of large intestine C0686087 human GSE4183 sample 190	5/273	0.930246	1	0	0	0.587962	0.0425136	MXI1;RPSA;MALAT1;SGK1;COX5A
autism spectrum disorder DOID-0060041 human GSE25507 sample 1023	5/273	0.930246	1	0	0	0.587962	0.0425136	LYPLA1;ANP32A;CAPZB;RAB27A;COX1
Breast cancer DOID-1612 mouse GSE24594 sample 616	7/358	0.932224	1	0	0	0.627707	0.0440537	EGR1;NHSL1;GSTA4;ARPC2;UBXN2A;CUL1;DSTN
polycystic ovary syndrome DOID-11612 human GSE8157 sample 880	5/275	0.932874	1	0	0	0.583686	0.0405574	PFKFB3;MYH9;HSPE1;YWHAG;ATF4
atopic dermatitis DOID-3310 human GSE26952 sample 981	6/319	0.934999	1	0	0	0.603813	0.0405824	HSPA8;AUTS2;FNBP1;TBL1XR1;HSPB8;SPTAN1
Down syndrome DOID-14250 human GSE19681 sample 1066	6/320	0.936168	1	0	0	0.601926	0.0397035	LASP1;HSP90AA1;ARPC2;EIF3H;SMYD3;ATF4
Tendonopathy 971 human GSE26051 sample 470	5/278	0.936651	1	0	0	0.577387	0.0377867	MYO18A;COX1;ANP32B;SORBS1;TTN
asthma DOID-2841 human GSE27011 sample 566	5/278	0.936651	1	0	0	0.577387	0.0377867	EGR1;AIM2;JMJD1C;SGK1;ELL2
glomerulosclerosis DOID-0050851 mouse GSE20844 sample 492	7/362	0.936718	1	0	0	0.620771	0.0405817	COIL;EGR1;EXOSC5;FUT9;TESC;ZMAT4;SORL1
Senescence C0001792 human GSE1786 sample 114	4/236	0.938758	1	0	0	0.544114	0.0343865	FHOD3;TPM3;ATF4;TTN
papillary thyroid carcinoma DOID-3969 human GSE54958 sample 653	8/406	0.93995	1	0	0	0.632566	0.0391741	EGR1;DPP6;ZMAT4;HSPB8;KIT;ITPR1;LIFR;PKNOX2
autistic disorder DOID-12849 human GSE6575 sample 1042	2/143	0.939992	1	0	0	0.448989	0.0277853	GLT1D1;AIM2
NASH C0400966 human GSE24807 sample 185	6/325	0.941737	1	0	0	0.592666	0.0355773	MACF1;RAB27A;ENO1;EEF2;HSPE1;SPTAN1
ulcerative colitis DOID-8577 human GSE9452 sample 924	4/239	0.942498	1	0	0	0.537284	0.0318189	SCAF8;PFKFB3;GLIS3;TNFRSF21
nemaline myopathy DOID-3191 mouse GSE3384 sample 975	4/239	0.942498	1	0	0	0.537284	0.0318189	EEF1A1;IDH1;IGF2BP2;PNRC1
autism spectrum disorder DOID-0060041 human GSE25507 sample 1030	5/283	0.942525	1	0	0	0.567186	0.0335734	SEPT9;CAPZB;ACTN4;DDX60;EEF2
Ankylosing Spondylitides C0038013 human GSE11886 sample 202	6/326	0.942797	1	0	0	0.590848	0.0348032	AIM2;SLC2A3;SORBS1;DDX60;KANK4;TTC39B
Infection by Yersinia enterocolitica C0238528 mouse GSE2973 sample 127	5/284	0.943639	1	0	0	0.565189	0.0327874	EEF1A1;WTAP;PDGFA;PAIP2;RELB
Bone fracture C0016658 rat GSE594 sample 275	4/241	0.944874	1	0	0	0.532825	0.0302133	CCND3;CELF1;COX1;COX5A
psoriasis DOID-8893 mouse GSE27628 sample 820	5/287	0.946866	1	0	0	0.559281	0.0305356	FHOD3;GK5;TESC;PRX;ELOVL6
Nephrolithiasis C0392525 mouse GSE10162 sample 187	6/330	0.946869	1	0	0	0.583686	0.031866	XPNPEP1;FUT9;MALAT1;PGPEP1;ACSS1;COX5A
sickle-cell anemia DOID-10923 human GSE16728 sample 506	2/148	0.947351	1	0	0	0.433821	0.0234635	COX1;XXYLT1
Type 2 diabetes mellitus C0011860 mouse GSE2899 sample 299	4/245	0.949359	1	0	0	0.524126	0.027238	EEF1A1;SNAP47;MOB2;PKP4
breast adenocarcinoma DOID-3458 human GSE61304 sample 1071	6/334	0.950679	1	0	0	0.576696	0.0291685	TSHZ2;DENND2A;KIT;EBF1;SMYD1;LAMC2
COPD - Chronic obstructive pulmonary disease C0024117 human GSE3212 sample 196	3/200	0.95084	1	0	0	0.481541	0.0242743	HSP90AA1;HSP90AB1;SORL1
Transplanted Heart Complication C0340529 mouse GSE582 sample 373	5/292	0.951874	1	0	0	0.549704	0.0271128	RCAN1;GJA1;SPARC;HSPB8;DSTN
melanoma DOID-1909 human GSE6887 sample 951	7/379	0.953016	1	0	0	0.592926	0.0285334	GLT1D1;PDGFC;IRAK3;BAZ2B;SGK1;PLXDC1;TTN
Breast Cancer C0006142 human GSE2155 sample 39	4/250	0.954494	1	0	0	0.513644	0.0239222	ARVCF;HSP90AA1;PAIP2;ARHGAP23
Alzheimer's disease DOID-10652 human GSE36980 sample 522	5/299	0.958166	1	0	0	0.536835	0.0229411	KIRREL3;KCNJ6;PGAP1;B3GNT2;RAI14
acute myocardial infarction DOID-9408 mouse GSE775 sample 1004	5/299	0.958166	1	0	0	0.536835	0.0229411	FHOD3;TSC22D1;TIMM23;HSPE1;HSPD1
Waldenstrom Macroglobulinemia UMLS CUI-C0024419 human GSE6691 sample 785	3/207	0.958291	1	0	0	0.465257	0.0198217	SGK1;SYN1;RTN4
fetal alcohol spectrum disorder DOID-0050696 mouse GSE34305 sample 525	4/255	0.959147	1	0	0	0.503572	0.0210047	NHSL1;PRKD3;TBCE;EBF1
amyotrophic lateral sclerosis type 10 DOID-0060201 human GSE18632 sample 629	6/344	0.959151	1	0	0	0.559931	0.023353	DENND2C;TBL1XR1;AGO2;KIT;TLK1;TRIM16
pancreatic ductal adenocarcinoma DOID-3498 mouse GSE53659 sample 699	1/101	0.959412	1	0	0	0.317849	0.0131698	EEF1A1
cystic fibrosis DOID-1485 mouse GSE3100 sample 1057	4/256	0.960023	1	0	0	0.501605	0.0204647	HSPA8;DLEU2;RHPN2;IGF2BP2
Alzheimer's disease DOID-10652 human GSE36980 sample 523	4/259	0.962548	1	0	0	0.495795	0.0189254	CX3CR1;LYPLA1;PIP5K1B;BTBD11
low-grade serous ovarian carcinomas DOID-0050933 human GSE56443 sample 755	4/259	0.962548	1	0	0	0.495795	0.0189254	CX3CR1;ANKRD45;ANK2;TACC1
ulcerative colitis DOID-8577 human GSE38713 sample 810	6/350	0.963577	1	0	0	0.550332	0.0204187	EGR1;AHCYL2;DNMBP;FAM189A1;SLC2A3;SGK1
bipolar disorder DOID-3312 human GSE62191 sample 546	5/306	0.963698	1	0	0	0.524554	0.0193966	TSACC;EBF1;CBFA2T2;COX5A;ETV5
psoriasis DOID-8893 mouse GSE27628 sample 824	5/307	0.964431	1	0	0	0.522846	0.0189359	GRAMD1B;CDH4;ZFP704;TESC;ATP2B4
severe asthma 2841 human GSE43696 sample 467	6/353	0.965623	1	0	0	0.545655	0.0190882	FHOD3;RIMS1;DDC;FN1;NCOA7;RAPGEF5
Leber congenital amaurosis C0339527 mouse GSE3249 sample 213	5/309	0.965856	1	0	0	0.519462	0.0180462	RABGEF1;SP2;TLN2;IGF2BP2;MCM2
ulcerative colitis DOID-8577 human GSE22619 sample 710	4/264	0.96643	1	0	0	0.486405	0.0166092	EXOSC5;HSP90AB1;USP10;KIT
nemaline myopathy DOID-3191 mouse GSE3384 sample 971	1/107	0.966465	1	0	0	0.300026	0.010234	PNRC1
Glaucoma C0017601 mouse GSE3554 sample 260	5/310	0.966549	1	0	0	0.517786	0.0176167	TNIP1;PDGFC;SLC39A11;IGF2BP2;U2AF1L4
idiopathic pulmonary fibrosis DOID-0050156 human GSE44723 sample 850	5/312	0.967896	1	0	0	0.514467	0.0167874	SALL1;RAB31;PDE4D;DENND2A;ROR2
bipolar disorder DOID-3312 human GSE46449 sample 572	7/401	0.968492	1	0	0	0.560397	0.0179409	PLEKHG1;SPARC;PDGFA;MALAT1;DLEU2;PTPRK;ZCCHC2
Asthma DOID-2841 human GSE43696 sample 635	5/314	0.969193	1	0	0	0.51119	0.0159961	FHOD3;DDC;PCDHGA3;JAM2;SH3GL2
Overexertion C0161750 human GSE3606 sample 286	5/314	0.969193	1	0	0	0.51119	0.0159961	CX3CR1;ANXA6;EIF3H;RPSA;COX5A
Type 2 diabetes mellitus C0011860 rat GSE2470 sample 238	4/268	0.969262	1	0	0	0.479145	0.0149591	PCDHGA1;DYM;SPPL3;TMEM131
atopic dermatitis skin DOID-3310 human GSE32924 sample 630	4/269	0.969934	1	0	0	0.477364	0.0145724	CDCA3;UHRF1;ALDH16A1;RELB
juvenile dermatomyositis UMLS CUI-C0263666 human GSE11971 sample 771	1/111	0.970473	1	0	0	0.289214	0.00866837	TTN
atherosclerosis DOID-1936 human GSE43292 sample 508	4/271	0.971238	1	0	0	0.473841	0.0138283	ENAH;RIMS1;HSPB8;PDE4D
dermatomyositis DOID-10223 human GSE48280 sample 705	2/171	0.971443	1	0	0	0.375471	0.0108784	TFDP1;NCOA3
multiple myeloma DOID-9538 human GSE47552 sample 561	5/318	0.971642	1	0	0	0.50476	0.0145209	AKAP12;EGR1;DENND5B;SOS1;BMPR1A
Depression DOID-1595 mouse GSE26025 sample 463	4/273	0.972489	1	0	0	0.47037	0.0131215	CFDP1;FUT9;PDE4D;ARHGAP5
Synovial sarcoma C0039101 mouse GSE6461 sample 22	4/273	0.972489	1	0	0	0.47037	0.0131215	TACC2;SGK1;COX5A;RTN4
Dry eye syndrome C0013238 rat GSE844 sample 228	5/320	0.972798	1	0	0	0.501605	0.0138338	COX1;EEF2;LITAF;COX5A;SYN1
Schistosomiases C0036323 mouse GSE19525 sample 439	1/115	0.974002	1	0	0	0.279154	0.00735348	GJA1
Idiopathic fibrosing alveolitis C0085786 human GSE21369 sample 321	4/277	0.97484	1	0	0	0.463577	0.0118129	EGR1;GLT1D1;SLC2A3;ELL2
cystic fibrosis DOID-1485 mouse GSE33319 sample 1048	5/324	0.974979	1	0	0	0.495412	0.0125532	CDCA3;IDH1;ANXA6;EXOC4;ELOVL6
ulcerative colitis DOID-8577 human GSE9452 sample 923	2/176	0.975047	1	0	0	0.364804	0.00921829	FAM189A1;CNNM2
Neurological pain disorder C0423704 rat GSE15041 sample 356	6/370	0.975356	1	0	0	0.520585	0.01299	ALDH1L1;ST8SIA1;PECAM1;ALPK3;CCNJL;TTN
smoldering myeloma DOID-9551 human GSE47552 sample 562	4/278	0.975397	1	0	0	0.46191	0.0115064	AKAP12;TIAM1;EGR1;LARP4B
autistic disorder DOID-12849 human GSE6575 sample 1045	4/280	0.976478	1	0	0	0.45861	0.0109165	MXI1;EBF1;SOS1;CTNNAL1
psoriasis DOID-8893 mouse GSE27628 sample 821	6/373	0.976783	1	0	0	0.516398	0.0121305	FHOD3;TESC;ATP2B4;ELOVL6;DLEU2;RHPN2
glaucoma associated with systemic syndromes DOID-1686 mouse GSE26299 sample 488	5/328	0.976997	1	0	0	0.489371	0.0113883	RIMS1;PPP2R2C;A330033J07RIK;HS3ST5;SYN1
Nemaline Myopathy C0206157 mouse GSE3384 sample 78	3/234	0.978212	1	0	0	0.411573	0.00906631	TIMM23;NUDT3;YWHAG
asthma DOID-2841 human GSE31773 sample 712	4/286	0.979457	1	0	0	0.448989	0.00931945	CX3CR1;TCF7L1;PCDHGB6;SLC39A11
Emery-Dreifuss muscular dystrophy, autosomal recessive form DOID-11726 mouse GSE8000 sample 677	5/334	0.979742	1	0	0	0.48058	0.00983565	HSPA8;TIMM23;ALPK3;SGK1;TNS1
Carcinoma, Hepatocellular C0019204 mouse GSE4612 sample 315	3/237	0.979757	1	0	0	0.406364	0.00831041	TSC22D1;IDH1;LIFR
Alzheimer's disease DOID-10652 human GSE36980 sample 519	6/380	0.979821	1	0	0	0.506885	0.0103331	EPHA4;KCNJ6;ARL15;ZMAT4;FN1;ETV5
Hutchinson-Gilford progeria syndrome UMLS CUI-C0033300 mouse GSE32609 sample 984	5/335	0.980168	1	0	0	0.479145	0.00959775	NDST1;HSP90AB1;IDH1;ELOVL6;ENO1
Down Syndrome DOID-14250 human GSE23910 sample 494	3/239	0.980728	1	0	0	0.402963	0.00784165	ATF1;DNMBP;TYMS
psoriasis DOID-8893 mouse GSE27628 sample 819	5/337	0.980996	1	0	0	0.476302	0.00913864	FHOD3;GK5;TESC;ELOVL6;SH3GL2
ulcerative colitis DOID-8577 human GSE9452 sample 454	2/187	0.981496	1	0	0	0.343345	0.00641283	FAM189A1;CNNM2
Lymphatic edema C0024236 mouse GSE4333 sample 207	4/293	0.982484	1	0	0	0.438263	0.00774474	PALLD;ACSL6;IGF2BP1;MYH9
nephronophthisis DOID-12712 mouse GSE6113 sample 942	4/293	0.982484	1	0	0	0.438263	0.00774474	PKP4;ENO1;PGPEP1;TNS1
adrenoleukodystrophy DOID-10588 human GSE34309 sample 865	5/342	0.982927	1	0	0	0.469338	0.00808241	CASP8AP2;PRKD3;ULK1;RNF220;KDM6A
Cystic Fibrosis C0010674 mouse GSE3100 sample 138	2/191	0.983414	1	0	0	0.336154	0.00562237	HSPA8;DLEU2
allergic contact dermatitis DOID-3042 human GSE6281 sample 927	5/345	0.983995	1	0	0	0.465257	0.00750677	FHOD3;LYPLA1;SGMS1;BTBD11;MAP4K3
ulcerative colitis DOID-8577 human GSE11223 sample 593	4/297	0.984019	1	0	0	0.43236	0.00696556	CRTAC1;FAM189A1;SORL1;CCNJL
Carcinoma, Hepatocellular C0019204 human GSE3632 sample 125	3/247	0.984186	1	0	0	0.389912	0.00621532	ATF1;LIFR;DLGAP4
Sjogren's syndrome DOID-12894 human GSE23117 sample 888	6/393	0.984505	1	0	0	0.490118	0.00765377	HSPA8;HSP90AA1;RPSA;EEF2;SGK1;ATF4
acute myocardial infarction DOID-9408 mouse GSE775 sample 1002	3/248	0.984574	1	0	0	0.388339	0.0060372	FHOD3;NUDT3;PAFAH1B1
polycystic ovary syndrome 11612 human GSE48301 sample 468	6/397	0.985728	1	0	0	0.48518	0.00697438	TENM3;ATAD5;UBXN2A;TSPAN5;ENO1;SORBS1
Nemaline Myopathy C0206157 mouse GSE3384 sample 317	1/134	0.985803	1	0	0	0.239573	0.00342557	IGF2BP2
morbid obesity DOID-11981 human GSE48964 sample 583	4/306	0.987019	1	0	0	0.419644	0.00548309	ANKRD28;EPB41L4A;DLEU2;ROR2
psoriasis DOID-8893 human GSE61281 sample 697	3/255	0.987045	1	0	0	0.377679	0.00492463	CRTAC1;FAT1;PPP1R9A
Lung transplant rejection C0729958 mouse GSE3418 sample 83	4/307	0.987317	1	0	0	0.418277	0.00533888	RHPN2;CELSR1;FGF1;TTN
allergic contact dermatitis DOID-3042 human GSE6281 sample 925	5/357	0.98767	1	0	0	0.449618	0.00557807	ATF1;AKAP12;PDGFC;AGPS;DDX60
Malignant tumor of pancreas C0346647 human GSE14245 sample 242	2/205	0.988721	1	0	0	0.313197	0.00355278	ARHGEF3;ACSS1
neurofibromatosis DOID-8712 mouse GSE29343 sample 670	1/142	0.988997	1	0	0	0.226076	0.00250121	HS3ST5
non-systemic juvenile idiopathic arthritis (sJIA) (subgroup-psoriatic) DOID-848 human GSE21521 sample 580	3/262	0.989134	1	0	0	0.367588	0.00401596	CX3CR1;ATAD5;KANSL1
schizophrenia DOID-5419 human GSE12679 sample 767	4/315	0.989479	1	0	0	0.407654	0.00431179	PPP4R1;MAML2;NOSIP;KANK4
Tachycardia C0039231 rat GSE7999 sample 244	2/208	0.98962	1	0	0	0.30868	0.00322074	COX1;ACSS1
pancreatic cancer DOID-1793 mouse GSE47811 sample 449	3/266	0.990178	1	0	0	0.362061	0.00357365	ABR;UBL3;1700008O03RIK
allergic contact dermatitis DOID-3042 human GSE6281 sample 926	5/368	0.990326	1	0	0	0.436178	0.00424034	ATF1;RAP1GAP2;PLEKHG1;UBL3;MAP4K3
psoriasis DOID-8893 mouse GSE27628 sample 823	4/319	0.990423	1	0	0	0.402542	0.00387375	AKAP12;CDH4;PHKG1;DLEU2
glaucoma associated with systemic syndromes DOID-1686 mouse GSE26299 sample 490	3/268	0.990663	1	0	0	0.359359	0.003371	DENND2C;MID1;KANK4
Asthma DOID-2841 human GSE43696 sample 634	4/321	0.990864	1	0	0	0.400034	0.00367144	DGKG;EGR1;FN1;NCOA7
Intestinal polyposis UMLS CUI-C1257915 mouse GSE6078 sample 952	6/420	0.991176	1	0	0	0.45861	0.0040648	DDC;XPNPEP1;IDH1;ACTN4;SGK1;2900026A02RIK
Turner syndrome DOID-3491 human GSE58435 sample 1059	3/272	0.991565	1	0	0	0.354074	0.00299928	GRAMD1B;EXOSC5;FOXN2
Sjogren's syndrome DOID-12894 human GSE23117 sample 890	5/377	0.992085	1	0	0	0.425766	0.00338351	HSPA8;HSP90AB1;ENO1;EEF2;ATF4
systemic juvenile idiopathic arthritis (sJIA) (enthesitis-related) DOID-848 human GSE21521 sample 575	3/278	0.992762	1	0	0	0.346432	0.00251665	KANSL1;UHRF1;TYMS
pancreatic ductal adenocarcinoma DOID-3498 mouse GSE61412 sample 698	2/223	0.993168	1	0	0	0.287917	0.00197394	RAP1GAP2;ACACB
hepatocellular carcinoma DOID-684 human GSE39791 sample 663	5/386	0.993536	1	0	0	0.415838	0.00269651	EGR1;MAP2K1;LIFR;ACACB;SRSF11
type 2 diabetes mellitus DOID-9352 human GSE23343 sample 893	4/344	0.994725	1	0	0	0.373288	0.00197436	KIRREL3;TRIM28;SH3PXD2A;MORC1
Cardiac Hypertrophy C1383860 mouse GSE5500 sample 5	2/235	0.995124	1	0	0	0.273215	0.00133559	EPHA4;PHKG1
asthma DOID-2841 human GSE31773 sample 713	3/294	0.995205	1	0	0	0.327579	0.00157451	CX3CR1;PCDHGB6;CDYL2
inclusion body myositis DOID-3429 human GSE48280 sample 706	1/169	0.995348	1	0	0	0.189957	0.000885704	DENND2C
Huntington's disease DOID-12858 human GSE8762 sample 930	1/171	0.995636	1	0	0	0.187735	0.000821122	AIM2
Carcinoma, Hepatocellular C0019204 mouse GSE2127 sample 300	3/298	0.995678	1	0	0	0.323182	0.00139996	ALDH1L1;DDC;IDH1
idiopathic pulmonary fibrosis DOID-0050156 human GSE44723 sample 851	3/300	0.995897	1	0	0	0.321027	0.00132003	CDCA3;KIT;KANK4
Pompe disease, infantile-onset form UMLS CUI-C0342751 human GSE38680 sample 870	2/242	0.995999	1	0	0	0.265312	0.00106377	PTPN14;NUDT3
Niemann-Pick Type C DOID-14504 mouse GSE39621 sample 495	4/357	0.996152	1	0	0	0.359694	0.0013866	EEF1A1;MALAT1;ANP32B;PAIP2
type 2 diabetes mellitus DOID-9352 mouse GSE54917 sample 614	3/304	0.996303	1	0	0	0.316803	0.0011735	AKAP12;HSP90AA1;FOXN2
Psoriasis vulgaris C0263361 human GSE13355 sample 35	1/182	0.996928	1	0	0	0.176389	0.000542783	RAI14
bipolar disorder DOID-3312 human GSE46449 sample 570	3/312	0.997001	1	0	0	0.30868	0.000927166	PDGFC;KIT;CCNJL
progressive myoclonus epilepsy DOID-891 mouse GSE47516 sample 517	1/185	0.997208	1	0	0	0.173528	0.000485163	XKR6
colitis DOID-0060180 mouse GSE34874 sample 800	2/255	0.997234	1	0	0	0.251786	0.000697506	DDC;FGF1
Burn C0006434 rat GSE802 sample 97	3/317	0.99737	1	0	0	0.303811	0.000800048	ALDH1L1;DDC;COX1
hepatocellular carcinoma DOID-684 human GSE60502 sample 656	3/317	0.99737	1	0	0	0.303811	0.000800048	EGR1;CDC37L1;ANK3
nasopharynx carcinoma DOID-9261 human GSE12452 sample 775	4/373	0.997403	1	0	0	0.344265	0.000895214	HSPB8;MOK;RHPN2;TNFRSF21
fetal alcohol spectrum disorder DOID-0050696 mouse GSE34305 sample 526	3/320	0.99757	1	0	0	0.300963	0.000732251	IMMP2L;SLCO2A1;CCNJL
multiple sclerosis DOID-2377 human GSE23832 sample 746	2/263	0.997798	1	0	0	0.244127	0.000538126	CX3CR1;TIAM1
asthma DOID-2841 human GSE43696 sample 829	3/324	0.997813	1	0	0	0.297247	0.000650653	FHOD3;DDC;KANK4
Type 2 diabetes mellitus C0011860 mouse GSE2899 sample 45	2/268	0.998092	1	0	0	0.239573	0.000457634	EEF1A1;ELOVL6
asthma DOID-2841 human GSE43696 sample 830	3/333	0.998277	1	0	0	0.289214	0.000498605	FHOD3;EGR1;DDC
nasopharynx carcinoma DOID-9261 human GSE12452 sample 776	4/392	0.998382	1	0	0	0.327579	0.000530599	EPS8;DYX1C1;HSPB8;RHPN2
polycystic ovary syndrome DOID-11612 human GSE48301 sample 560	2/275	0.998439	1	0	0	0.233474	0.00036481	ARHGEF3;COMMD1
Diabetes and Obesity DOID-9970 mouse GSE54917 sample 807	2/282	0.998723	1	0	0	0.227679	0.000290862	HSP90AA1;FOXN2
type 2 diabetes mellitus DOID-9352 human GSE23343 sample 895	3/347	0.998814	1	0	0	0.277545	0.000329293	PCDHGA10;TENM4;SETD1A
Alzheimer's disease DOID-10652 human GSE36980 sample 524	2/292	0.999043	1	0	0	0.219882	0.000210511	EGR1;BCAT1
Niemann-Pick Type C disease DOID-14504 mouse GSE39621 sample 471	3/356	0.999069	1	0	0	0.270529	0.000252089	EEF1A1;ANP32B;PAIP2
Fibrosis of lung (disorder) DOID-3770 mouse GSE43695 sample 631	3/358	0.999117	1	0	0	0.269017	0.000237548	VMN2R85;VWF;FN1
Hypercholesteremia C0020443 mouse GSE3889 sample 221	2/298	0.999195	1	0	0	0.215455	0.000173424	ALDH1L1;LIFR
Preeclampsia C0032914 human GSE4707 sample 352	1/225	0.999221	1	0	0	0.142679	0.000111205	ANK3
Viral cardiomyopathy C0264797 human GSE4172 sample 384	1/227	0.999269	1	0	0	0.141422	0.000103413	COX5A
schizophrenia DOID-5419 human GSE12679 sample 542	2/304	0.999324	1	0	0	0.211202	0.000142894	CRTAC1;CISD2
Spinal Muscular Atrophy C0026847 mouse GSE10599 sample 235	1/232	0.999377	1	0	0	0.138374	8.62741e-05	UHRF1
autism spectrum disorder DOID-0060041 human GSE29691 sample 1038	2/307	0.99938	1	0	0	0.209138	0.000129716	TSPAN5;RALY
nasopharynx carcinoma DOID-9261 human GSE12452 sample 777	4/433	0.999428	1	0	0	0.296561	0.000169794	ABLIM1;EBF1;RHPN2;TNFRSF21
nasopharynx carcinoma DOID-9261 human GSE12452 sample 774	3/375	0.999442	1	0	0	0.256822	0.000143294	EPS8;EBF1;RHPN2
osteoarthritis DOID-8398 rat GSE8077 sample 944	1/245	0.999588	1	0	0	0.131032	5.40033e-05	GSTA4
glaucoma associated with systemic syndromes DOID-1686 mouse GSE26299 sample 489	1/250	0.999648	1	0	0	0.128411	4.51459e-05	MID1
psoriasis DOID-8893 mouse GSE27628 sample 822	1/254	0.99969	1	0	0	0.126389	3.91349e-05	ENO1
pulmonary sarcoidosis DOID-13406 human GSE19976 sample 765	2/342	0.999775	1	0	0	0.187735	4.21531e-05	EGR1;AIM2
Diabetes DOID-9351 mouse GSE31150 sample 805	2/346	0.9998	1	0	0	0.185565	3.71018e-05	EGR1;ETV5
Wolfram Syndrome 10632 mouse GSE33372 sample 457	1/273	0.99983	1	0	0	0.117592	1.99668e-05	SGK1
asthma DOID-2841 human GSE31773 sample 715	1/292	0.999906	1	0	0	0.109941	1.03077e-05	CX3CR1
liver cirrhosis DOID-5082 human GSE50892 sample 1012	1/299	0.999924	1	0	0	0.107367	8.11104e-06	EGR1
schizophrenia DOID-5419 human GSE27383 sample 548	1/315	0.999953	1	0	0	0.101913	4.74158e-06	AIM2
papillary thyroid carcinoma DOID-3969 human GSE54958 sample 652	2/402	0.999959	1	0	0	0.159715	6.5107e-06	EGR1;RN7SK
allergic contact dermatitis DOID-3042 human GSE6281 sample 928	1/321	0.999961	1	0	0	0.100009	3.89625e-06	MAP4K3
asthma DOID-2841 human GSE31773 sample 714	1/328	0.999968	1	0	0	0.0978742	3.11196e-06	CX3CR1
glaucoma associated with systemic syndromes DOID-1686 mouse GSE26299 sample 487	1/345	0.99998	1	0	0	0.0930514	1.84804e-06	HS3ST5
nasopharynx carcinoma DOID-9261 human GSE12452 sample 778	1/386	0.999992	1	0	0	0.0831677	6.59038e-07	UBL3
glaucoma associated with systemic syndromes DOID-1686 mouse GSE26299 sample 486	1/415	0.999995	1	0	0	0.077356	4.13552e-07	SMYD1

## Sheet: Disease Perturbations from GEO up
Term	Overlap	P-value	Adjusted P-value	Old P-value	Old Adjusted P-value	Odds Ratio	Combined Score	Genes
Huntington's disease DOID-12858 mouse GSE3248 sample 727	31/354	2.50114e-07	0.000209846	0	0	2.81126	42.7349	SNAP47;HSP90AB1;CTBP2;ANP32A;CLTC;PDGFA;NUDT3;IGF1R;SPRED2;TRIM28;MXI1;EPC1;NCAM1;PAIP2;SRSF11;HSPA8;CREBBP;ERDR1;GALNT2;ANK3;EEF2;YWHAZ;EEF1A1;PPM1A;NCOR1;UBE2R2;SYT11;TAB2;MAPT;TOP1;PAFAH1B1
acute myocardial infarction DOID-9408 mouse GSE775 sample 1001	26/308	4.54126e-06	0.00190506	0	0	2.70997	33.3389	ATF1;SPARC;HSP90AB1;AHNAK;CLTC;LITAF;HSPD1;AKAP12;GJA1;QK;ACSS1;YWHAG;EGR1;HSP90AA1;TIMM23;DSTN;SHROOM3;HSPE1;YWHAZ;RCAN1;ARPC2;UBE2R2;MYH9;TOP1;EIF3A;ATF4
Uterine leiomyoma C0042133 human GSE2724 sample 225	22/262	2.6362e-05	0.00737257	0	0	2.69565	28.4218	FHOD3;SPARC;HSP90AB1;BNC2;FN1;ITPR1;ATP2B4;ENO1;TYMS;EEF2;EPS8;RAB31;PALLD;ST5;PDGFC;ANXA6;EIF3H;NCAM1;TRIM16;CTNNAL1;TNFRSF21;RAI14
pancreatitis DOID-4989 mouse GSE3644 sample 513	27/362	2.83159e-05	0.00593926	0	0	2.3944	25.0744	HSP90AB1;CTBP2;CLTC;IQGAP1;LITAF;RTN4;PPP4R1;RPS6KA2;MYO18A;YWHAG;TGIF1;EGR1;HSPA8;HSP90AA1;TSC22D1;DSTN;ACTN4;EEF2;ELL2;RCAN1;ARPC2;AGO2;MYH9;ANP32B;TACC2;TOP1;ATF4
Leukemia, Chronic T-Cell C2363142 human GSE5788 sample 74	23/287	3.64001e-05	0.00610794	0	0	2.57269	26.2953	HSPA8;LYPLA1;HSP90AB1;AHNAK;AUTS2;NOSIP;RPSA;ENO1;EEF2;COX5A;YWHAZ;HSPD1;SEPT9;CCND3;TRIM28;CAPZB;SP3;ANXA6;PIEZO1;MYH9;EIF3H;SGK1;ATF4
Down Syndrome C0013080 mouse GSE1611 sample 105	23/294	5.28766e-05	0.00739391	0	0	2.51144	24.7315	HSP90AA1;SPARC;ERDR1;DSTN;YWHAZ;RTN4;EPN1;IGF1R;HSPD1;NCOR2;RCAN1;PCM1;ARPC2;AGO2;REV3L;NCAM1;MAPT;TOP1;JARID2;PAIP2;BCAT1;SPTAN1;PAFAH1B1
acute myocardial infarction DOID-9408 mouse GSE775 sample 1000	30/443	6.31069e-05	0.00756381	0	0	2.174	21.0241	ATF1;CUL3;CLTC;STRN3;HSPD1;UBL3;QK;ARIH1;PAIP2;ACSS1;SRSF11;YWHAG;EGR1;HSP90AA1;ERDR1;TSC22D1;TIMM23;DSTN;HSPE1;YWHAZ;RCAN1;ARPC2;UBE2R2;PKP4;TAB2;TOP1;SGK1;EIF3A;ATF4;PAFAH1B1
acute myocardial infarction DOID-9408 mouse GSE775 sample 1002	25/352	0.000121211	0.012712	0	0	2.28002	20.5612	ATF1;AHNAK;CLTC;LITAF;RTN4;IGF1R;HSPD1;GJA1;TSPAN9;ANXA6;SPTAN1;YWHAG;HSPA8;HSP90AA1;TSC22D1;DSTN;SHROOM3;ACTN4;ENAH;ADAM19;EEF1A1;RCAN1;ARPC2;MYH9;ATF4
Hypoxia C0242184 mouse GSE3195 sample 70	21/272	0.000132893	0.0123886	0	0	2.47852	22.1232	MAP2K1;HSP90AA1;PFKFB3;AHNAK;FN1;DSTN;SLC2A3;ACTN4;IQGAP1;EEF2;PNRC1;FAM129B;ARPC2;XPNPEP1;TSPAN9;PALLD;MXI1;SGK1;PAIP2;SPTAN1;ATF4
Asthma, allergic C0155877 human GSE3004 sample 360	26/383	0.000184135	0.0154489	0	0	2.1793	18.7416	HSP90AB1;CTBP2;ENO1;LITAF;HSPD1;EPS8;SEPT9;LASP1;TRIM28;HSPA8;HSP90AA1;TSC22D1;ACTN4;HIPK1;HSPE1;MID1;YWHAZ;SYN1;STK24;ARPC2;TNIP1;PALLD;ST5;MYH9;TOP1;ATF4
Acute pancreatitis C0001339 mouse GSE3644 sample 376	27/412	0.000246134	0.0187733	0	0	2.10382	17.482	HSP90AB1;HSPB8;CLTC;IQGAP1;RTN4;HSPD1;RPS6KA2;YWHAG;TGIF1;EGR1;HSPA8;HSP90AA1;ERDR1;TSC22D1;DSTN;ACTN4;EEF2;ELL2;PNRC1;EEF1A1;RCAN1;ARPC2;AGO2;MYH9;ANP32B;TACC2;ATF4
Down Syndrome C0013080 human GSE5390 sample 277	29/460	0.000281766	0.0197002	0	0	2.02387	16.544	ATF1;DGKG;CX3CR1;SPARC;SGMS1;ENO1;ARHGAP5;EPS8;GJA1;SALL1;PDGFC;SH3BP4;PIEZO1;JAM2;KDM6A;NTRK2;DARS;PCDHGA6;PCDHGA5;VWF;TIAM1;TBL1XR1;PALLD;PECAM1;WAC;MYH9;TAB2;SGK1;FRYL
Parkinson's disease DOID-14330 human GSE7621 sample 940	18/235	0.000431217	0.02783	0	0	2.45893	19.054	HSPA8;HSP90AA1;TSC22D1;ACTN4;IQGAP1;HSPE1;PNRC1;TIAM1;GJA1;PPM1B;UBL3;STK24;KIT;COX1;MALAT1;SGK1;SH3GL2;ATF4
Bacterial Infection C0004623 human GSE3026 sample 322	25/385	0.000472188	0.0282976	0	0	2.08459	15.9641	MACF1;SPARC;AHNAK;ANP32A;ENO1;IQGAP1;NUDT3;SEPT9;ARVCF;LASP1;ANXA6;PIEZO1;PAK4;RAP1GAP2;FNBP1;EEF2;SORL1;YWHAZ;SYN1;ADAM19;ST5;PECAM1;MYH9;TACC1;ANP32B
Parkinson's disease DOID-14330 human GSE7621 sample 941	23/342	0.000484718	0.0271119	0	0	2.15896	16.477	PCDHGA8;CX3CR1;DARS;HSPA8;NTRK2;HSP90AA1;SPARC;HSP90AB1;CTBP2;SORBS1;FGF1;HSPE1;SORL1;HSPD1;EEF1A1;TIAM1;GJA1;RAB31;MXI1;SGK1;TNS3;SH3GL2;ATF4
Sarcoidosis C0036202 human GSE2657 sample 12	26/413	0.000584303	0.0306394	0	0	2.021	15.0465	HSP90AB1;AHNAK;SLC2A3;ENO1;LITAF;HSPD1;CAPZB;MXI1;PIEZO1;JARID2;HSP90AA1;FNBP1;PDE4D;ACTN4;EEF2;SORL1;YWHAZ;ADAM19;STK24;ARPC2;ST5;MYH9;ULK1;TAB2;ANP32B;ATF4
schizophrenia 5419 human GSE12654 sample 465	20/284	0.000625383	0.0308645	0	0	2.26076	16.6779	HSPA8;HSP90AA1;TSC22D1;SLC2A3;ENO1;ACTN4;NMNAT2;EEF2;COX5A;ETV5;CTIF;SEPT9;ATXN2;ARPC2;CAPZB;EPB41L1;SYT11;ANXA6;TRIM16;SPTAN1
Huntington's disease DOID-12858 mouse GSE3248 sample 728	20/288	0.000744593	0.0347063	0	0	2.22936	16.0573	MACF1;CREBBP;ERDR1;CLTC;ITPR1;ANK3;YWHAZ;NUDT3;TMEM131;PCDHGA10;EEF1A1;TSPAN9;AGO2;MXI1;MYH9;MAPT;IGF2BP2;SRSF11;TNRC6A;ATF4
endometriosis DOID-289 human GSE6364 sample 947	16/209	0.000885894	0.0391192	0	0	2.45763	17.2744	EGR1;HSPA8;HSP90AA1;SPARC;PFKFB3;HSP90AB1;ACTN4;HSPE1;EEF1A1;GJA1;ARPC2;COX1;RHPN2;SGK1;CTNNAL1;ATF4
chronic lymphocytic leukemia DOID-1040 human GSE6691 sample 786	21/315	0.000936896	0.0393028	0	0	2.14018	14.9234	NSF;SMAD2;TGIF1;GRAMD1B;IGSF3;NCOA3;TESC;ATP2B4;NOSIP;LITAF;TTN;AKAP12;ABR;RAB31;DNMBP;AIM2;TNIP1;MXI1;ARHGEF3;TOP1;ZCCHC2
Cardiomyopathy, Dilated C0007193 human GSE3585 sample 198	21/326	0.00143733	0.0574247	0	0	2.06797	13.5348	EGR1;SPARC;AUTS2;VWF;FNBP1;FN1;FRMD4B;FGF1;ETV5;ENOX1;EPS8;EXT1;AKAP12;SPRED2;RAB31;TSPAN9;SYT11;TRPS1;ALPK3;MAPT;DLGAP4
Overexertion C0161750 human GSE3606 sample 286	19/286	0.00167322	0.0638104	0	0	2.1327	13.6344	HSPA8;MAP2K1;HSP90AA1;HIP1;HSP90AB1;USP10;RAB27A;SLC2A3;IQGAP1;HIPK1;LITAF;SORL1;PNRC1;EEF1A1;LASP1;PPP4R1;PECAM1;SGK1;RAF1
Hypertension C0020538 rat GSE2739 sample 209	14/182	0.00173598	0.0633254	0	0	2.46944	15.6962	HSPA8;HSP90AA1;SPARC;HSP90AB1;TSC22D1;AHNAK;IGF1R;HSPD1;EEF1A1;PCM1;PECAM1;COX1;MAPT;SGK1
nemaline myopathy DOID-3191 mouse GSE3384 sample 971	28/493	0.00175328	0.0612918	0	0	1.82328	11.571	MACF1;HSP90AB1;HSPB8;CLTC;RTN4;STRN3;HSPD1;UBL3;ANXA6;SMYD1;EPC1;QK;PAIP2;YWHAG;HSPA8;TPM3;TIMM23;HSPE1;NCOR2;EEF1A1;RCAN1;PPM1A;UBE2R2;CCDC6;TAB2;RAF1;ATF4;PAFAH1B1
Urothelial carcinoma in situ C0334267 human GSE3167 sample 229	23/380	0.00197348	0.0662299	0	0	1.94306	12.1013	TGIF1;EGR1;HSP90AA1;SPARC;PFKFB3;TSC22D1;VWF;IDH1;CLTC;RPSA;YWHAZ;RTN4;HSPD1;AKAP12;RCAN1;GJA1;LASP1;PPP4R1;ARPC2;ANP32B;SGK1;TNFRSF21;RAI14
Scleroderma C0011644 human GSE1724 sample 155	24/411	0.00254413	0.0820972	0	0	1.87461	11.1989	HSPA8;CEMIP;HSP90AA1;HSP90AB1;SPARC;DSTN;ENO1;LITAF;YWHAZ;RTN4;PCDHGA9;HSPD1;EXT1;LASP1;STK24;ARPC2;CAPZB;TRIM28;PALLD;FAT1;ANXA6;TSPAN5;TACC1;ATF4
Purpura, Idiopathic Thrombocytopenic C0043117 human GSE574 sample 358	29/531	0.00260333	0.0808961	0	0	1.75326	10.4336	CX3CR1;MACF1;HSP90AB1;AHNAK;SLC2A3;ENO1;IQGAP1;LITAF;RTN4;HSPD1;CCND3;LASP1;CAPZB;ANXA6;TLK1;PIEZO1;FAM53B;RALY;HSPA8;HSP90AA1;FNBP1;ACTN4;EEF2;SORL1;YWHAZ;STK24;ARPC2;EIF3H;MYH9
Schizophrenia C0036341 human GSE12654 sample 226	18/276	0.00267184	0.0800597	0	0	2.09366	12.4049	HSPA8;HSP90AA1;TSC22D1;SLC2A3;ENO1;ACTN4;EEF2;COX5A;ETV5;CTIF;SEPT9;ATXN2;ARPC2;CAPZB;EPB41L1;SYT11;ANXA6;SPTAN1
acute myocardial infarction DOID-9408 mouse GSE775 sample 1003	19/303	0.00319253	0.0923632	0	0	2.01304	11.5688	HSP90AA1;ERDR1;AHNAK;DSTN;SHROOM3;YWHAZ;RTN4;EPN1;IGF1R;EEF1A1;RCAN1;TRIM28;ARPC2;TSPAN9;MYH9;SGK1;ACSS1;SPTAN1;YWHAG
Hypoxia C0242184 mouse GSE2271 sample 446	18/290	0.00449329	0.125662	0	0	1.99258	10.7702	SRRM2;ITPR1;SIPA1L2;TEX2;PDS5A;2900026A02RIK;NCOR2;CCND3;XPNPEP1;PALLD;ULK1;MALAT1;TLN2;TOP1;ZCCHC2;ATF4;MAP4K4;SNTB2
Retinitis Pigmentosa C0035334 mouse GSE128 sample 33	20/338	0.00483383	0.130825	0	0	1.89957	10.1287	NSF;HSP90AA1;SPARC;HSP90AB1;CTBP2;CUL3;DSTN;HSPE1;IGF1R;EEF1A1;GJA1;UBL3;EPC1;ARIH1;TOP1;SGK1;PAIP2;BCAT1;SPTAN1;ATF4
Meningococcal infection C0025303 human GSE4646 sample 347	22/387	0.00515033	0.135035	0	0	1.82496	9.61517	CDK17;MAP2K1;PFKFB3;VWF;WTAP;DSTN;ENO1;EEF2;YWHAZ;RTN4;EXT1;AKAP12;GJA1;RAB31;TRIM28;TNIP1;ZMIZ1;RPS6KA2;PIEZO1;SGK1;ATF4;MAP4K4
skin squamous cell carcinoma DOID-3151 human GSE2503 sample 627	15/227	0.00517307	0.131522	0	0	2.12133	11.1673	HSPA8;HSP90AA1;FN1;ENO1;ACTN4;YWHAZ;ENAH;GJA1;ABLIM1;PPP4R1;RAB31;ARPC2;PIEZO1;MYH9;SGK1
acute myeloid leukemia DOID-9119 human GSE9476 sample 783	11/145	0.00576935	0.142367	0	0	2.43538	12.5549	EPS8;ANKRD28;EGR1;DEPTOR;KIT;CCDC6;ENO1;SMYD3;IGF2BP2;TYMS;TNS3
Nemaline Myopathy C0206157 mouse GSE3384 sample 160	17/276	0.00610152	0.146262	0	0	1.97734	10.0829	ANKRD28;HSPA8;HSP90AB1;TPM3;HSPB8;YWHAZ;EPN1;IGF1R;STRN3;HSPD1;NCOR2;RCAN1;UBL3;SMYD1;ARIH1;MAPT;YWHAG
Neurofibromatosis DOID-8712 mouse GSE1482 sample 667	21/369	0.00610929	0.14238	0	0	1.82698	9.31387	HSPA8;SNAP47;SPARC;CUL3;TIMM23;DSTN;ANK3;NUDT3;RTN4;IGF1R;STRN3;ABR;GJA1;UBL3;ARPC2;AGO2;PKP4;TAB2;MAPT;SPTAN1;PAFAH1B1
astrocytoma DOID-3069 human GSE15824 sample 860	18/299	0.00613107	0.139026	0	0	1.93261	9.84544	PCDHGA8;CX3CR1;DARS;NTRK2;SPARC;MAML2;RPSA;EEF2;SORL1;EEF1A1;GJA1;DPP6;ABLIM1;RAB31;GSTA4;EIF3H;TNS3;JAM2
endometrial cancer DOID-1380 human GSE17025 sample 849	17/278	0.00654248	0.144451	0	0	1.96312	9.87337	HSPA8;HSP90AA1;PFKFB3;ENO1;YWHAZ;RTN4;HSPD1;PPM1B;STK24;ARPC2;FAT1;CCDC6;COX1;NCOA7;E2F3;RHPN2;YWHAG
Synovial sarcoma C0039101 mouse GSE6461 sample 22	19/327	0.00715639	0.153954	0	0	1.8653	9.2141	SNAP47;HSP90AA1;SPARC;TENM3;HSP90AB1;TSC22D1;CLTC;DSTN;RPSA;ENO1;EEF2;YWHAZ;EEF1A1;CFDP1;GSTA4;ARPC2;TRPS1;ANP32B;SPTAN1
nemaline myopathy DOID-3191 mouse GSE3384 sample 977	21/379	0.00817509	0.171473	0	0	1.77878	8.54999	MACF1;HSPA8;SPARC;HSP90AB1;AHNAK;TPM3;GALNT2;HSPB8;LARP4B;HSPE1;RTN4;EPN1;STRN3;HSPD1;NCOR2;EEF1A1;RCAN1;PPM1B;ARPC2;ARIH1;ATF4
Carcinoma in situ of small intestine C0686083 mouse GSE422 sample 119	22/408	0.00931918	0.190702	0	0	1.73103	8.09374	MACF1;HSPA8;HSP90AB1;AHNAK;TSC22D1;FN1;TIMM23;LAMC2;LITAF;YWHAZ;TMEM131;RTN4;HSPD1;EPS8;EEF1A1;GJA1;MYH9;PKP4;TAB2;TOP1;ANP32B;YWHAG
cardiomyopathy DOID-0050700 human GSE9128 sample 780	21/385	0.00966565	0.193083	0	0	1.75106	8.12347	ATF1;ANKRD17;CX3CR1;CASP8AP2;EGR1;DARS;HSPA8;LYPLA1;COG5;IDH1;MRPS31;ENO1;IQGAP1;DDX60;HSPD1;ZZZ3;TBL1XR1;SP3;ARFIP1;TAB2;SGK1
head and neck squamous cell carcinoma 5520 human GSE6631 sample 458	20/363	0.0102768	0.200517	0	0	1.76875	8.09708	HSPA8;HSP90AA1;SPARC;HSP90AB1;FN1;ENO1;PTPRK;EEF2;YWHAZ;SYN1;RTN4;HSPD1;EEF1A1;SEPT9;LASP1;ST5;FAT1;MYH9;ANP32B;MCM2
endometrial cancer DOID-1380 human GSE17025 sample 844	16/269	0.0105035	0.200283	0	0	1.90946	8.69957	HSP90AA1;PFKFB3;ENO1;YWHAZ;RTN4;HSPD1;STK24;FAT1;CCDC6;COX1;NCOA7;E2F3;RHPN2;TOP1;KANK4;YWHAG
Senescence C0001792 mouse GSE5078 sample 331	17/293	0.0107344	0.200137	0	0	1.86262	8.44566	HSP90AB1;ANP32A;ERDR1;AHNAK;DSTN;ANK3;YWHAZ;RTN4;IGF1R;HSPD1;EEF1A1;GJA1;PKP4;SGK1;SRSF11;TNRC6A;PAFAH1B1
Uterine leiomyoma C0042133 human GSE593 sample 16	16/270	0.0108552	0.197989	0	0	1.90238	8.6047	MACF1;IGSF3;BNC2;HSPB8;FN1;RPSA;ACTN4;RBPJ;ENAH;RAB31;PALLD;ST5;PDGFC;ARHGEF3;NCAM1;RAI14
Osteoarthritis C0029408 human GSE16464 sample 199	18/317	0.010861	0.19388	0	0	1.82287	8.24406	HSP90AA1;SPARC;PFKFB3;HSP90AB1;CDCA3;UHRF1;FN1;ENO1;TYMS;YWHAZ;RCAN1;GJA1;ARPC2;ANXA6;COX1;ANP32B;SRSF11;YWHAG
Muscular Dystrophy C0026850 mouse GSE2507 sample 232	16/271	0.011216	0.196047	0	0	1.89536	8.51096	MACF1;HSPA8;CUL3;DSTN;RTN4;HSPD1;GJA1;ATXN2;UBL3;UBE2R2;SMYD1;QK;TAB2;TOP1;PAIP2;YWHAG
Nemaline Myopathy C0206157 mouse GSE3384 sample 317	24/466	0.0115756	0.198203	0	0	1.65336	7.37209	MACF1;HSP90AB1;AHNAK;TPM3;HSPB8;CLTC;LARP4B;RTN4;STRN3;HSPD1;NCOR2;EEF1A1;RCAN1;PPM1A;PPM1B;UBL3;UBE2R2;SMYD1;QK;TAB2;ARIH1;RAF1;YWHAG;ATF4
Tachycardia C0039231 rat GSE7999 sample 244	21/392	0.011674	0.19589	0	0	1.71979	7.65373	FHOD3;MACF1;LYPLA1;HSP90AA1;SPARC;ANP32A;TSC22D1;USP10;HSPB8;FN1;RPSA;ENO1;EEF2;HSPE1;RTN4;EEF1A1;RCAN1;CCDC141;SAE1;SPTAN1;YWHAG
Androgen insensitivity syndrome C0039585 human GSE3871 sample 415	16/273	0.0119661	0.196854	0	0	1.88148	8.32682	GRAMD1B;NRP2;SPARC;PFKFB3;CRADD;PVT1;PTPN14;CD2AP;ENOX1;CTIF;RAB31;APBB2;NCAM1;BCAT1;ACSS1;PKNOX2
endometriosis of ovary DOID-11432 human GSE7305 sample 939	18/321	0.0122297	0.197321	0	0	1.80015	7.92768	EGR1;SPARC;HSP90AB1;BNC2;VWF;FN1;DSTN;RTN4;EPS8;AKAP12;ABLIM1;RAB31;GSTA4;MXI1;ANXA6;MALAT1;CTNNAL1;ATF4
endometrial cancer DOID-1380 human GSE17025 sample 840	17/298	0.0125288	0.198333	0	0	1.83136	8.02087	HSPA8;HSP90AA1;HSP90AB1;IDH1;FN1;ENO1;IL17RD;YWHAZ;HSPD1;LASP1;FAT1;ARHGEF3;CCDC6;COX1;NCOA7;SMYD3;YWHAG
Tendonopathy 971 human GSE26051 sample 470	18/322	0.0125923	0.195647	0	0	1.79456	7.85062	EGR1;HSPA8;SPARC;PFKFB3;FN1;DSTN;IQGAP1;YWHAZ;RTN4;EPS8;EEF1A1;GJA1;ARPC2;CRTAC1;PALLD;FAT1;MALAT1;ATF4
Neurological pain disorder C0423704 rat GSE15041 sample 356	14/230	0.0133432	0.203545	0	0	1.95408	8.43526	DARS;LYPLA1;ANK2;SLC2A3;IRAK3;FOXN2;FBXO11;GATAD2B;RIMS2;RAB31;REV3L;FBRSL1;MDM4;PGPEP1
Breast Cancer C0006142 human GSE2155 sample 39	19/350	0.0140378	0.210316	0	0	1.74272	7.43445	EGR1;AHNAK;EED;LIMK2;FN1;LAMC2;ACTN4;FRMD4B;EEF2;ELL2;PTPN14;RTN4;TRAIP;GJA1;STK24;PALLD;EXOC4;MPZL1;MAP4K4
COPD - Chronic obstructive pulmonary disease C0024117 human GSE3212 sample 196	21/400	0.0143642	0.211431	0	0	1.68539	7.15115	MAP2K1;IDH1;CLTC;FN1;RPSA;SLC2A3;ENO1;IQGAP1;EEF2;LITAF;COX5A;YWHAZ;HSPD1;LASP1;RAB31;ARPC2;TNIP1;PIEZO1;TRIP12;ANP32B;SGK1
PTSD - Post-traumatic stress disorder C0038436 human GSE860 sample 338	16/279	0.0144547	0.209095	0	0	1.84102	7.7999	SRRM2;MAP2K1;SPARC;HSP90AB1;AHNAK;ACTN4;YWHAZ;SORL1;RTN4;EEF1A1;SEPT9;CCND3;STK24;ANXA6;PECAM1;MYH9
Carcinoma in situ of large intestine C0686087 human GSE4183 sample 190	18/327	0.0145347	0.206688	0	0	1.76712	7.47708	HSPA8;HSP90AA1;SPARC;HSP90AB1;CLTC;FN1;RAB27A;DSTN;EEF2;HSPE1;YWHAZ;SORL1;PNRC1;FAT1;MYH9;EIF3H;YWHAG;ATF4
Breast Cancer C0006142 rat GSE1872 sample 63	14/233	0.0147918	0.206839	0	0	1.92892	8.12785	TGIF1;HSPA8;TSC22D1;ENO1;MSI2;LITAF;NCOR2;EEF1A1;GJA1;FAT1;COX1;SGK1;MPZL1;RAI14
Type 1 diabetes mellitus C0011854 mouse GSE1659 sample 346	19/352	0.0148232	0.203879	0	0	1.73282	7.29787	HSP90AB1;AHNAK;TPM3;GALNT2;CUL1;TIMM23;EEF2;MAPK14;EEF1A1;PPM1A;UBL3;ANXA6;CCDC6;DYM;TAB2;ANP32B;SGK1;ACSS1;ATF4
Oligodendroglioma C0028945 human GSE4290 sample 251	15/257	0.0151666	0.205239	0	0	1.8737	7.84829	HSPA8;NTRK2;SPARC;HSP90AB1;HSPB8;RPSA;EEF2;PNRC1;EEF1A1;PCDHGA12;LASP1;RAB31;ANXA6;COX1;MALAT1
Uterine leiomyoma C0042133 human GSE2725 sample 399	15/258	0.0156585	0.208531	0	0	1.86644	7.7583	HSP90AA1;BNC2;FN1;ITPR1;ENO1;IQGAP1;RTN4;EPS8;RAB31;TRIM28;ST5;PDGFC;ANXA6;TNFRSF21;RAI14
adrenoleukodystrophy DOID-10588 human GSE34309 sample 865	15/258	0.0156585	0.205273	0	0	1.86644	7.7583	ANKRD28;ANKRD11;SLC2A3;GDF3;FGF4;AKAP12;DEPTOR;SALL1;PDGFC;FAT1;B3GNT2;JARID2;SGK1;JAM2;RAI14
Endometriosis C0014175 human GSE6364 sample 393	15/259	0.0161625	0.20862	0	0	1.85923	7.66945	EGR1;HSPA8;HSP90AA1;SPARC;HSP90AB1;IDH1;FN1;IQGAP1;HSPE1;GJA1;ARPC2;REV3L;COX1;CTNNAL1;ATF4
schizophrenia DOID-5419 human GSE17612 sample 852	18/332	0.0167045	0.21235	0	0	1.74051	7.1223	HSP90AA1;PFKFB3;HSP90AB1;RPSA;ENO1;PTPRK;TEX2;HSPE1;PNRC1;AKAP12;EEF1A1;GJA1;ABLIM1;MXI1;WAC;COX1;ANP32B;SH3GL2
Cerebral Infarction C0007785 mouse GSE63 sample 262	12/192	0.0174379	0.218364	0	0	2.00642	8.12422	AKAP12;EGR1;HSPA8;HSP90AA1;ERDR1;DSTN;HSPE1;LITAF;RTN4;YWHAG;ATF4;HSPD1
Protozoan Infection C0033740 human GSE2077 sample 239	18/334	0.0176398	0.217644	0	0	1.73009	6.98539	HSPA8;HSP90AA1;HSP90AB1;TSC22D1;DSTN;ACTN4;TYMS;HSPE1;YWHAZ;RTN4;HSPD1;EEF1A1;LASP1;ARPC2;FAT1;EIF3H;TACC1;TRIM16
acute myocardial infarction DOID-9408 mouse GSE775 sample 1005	22/434	0.0178845	0.217466	0	0	1.62733	6.54807	HSPA8;SPARC;AHNAK;TSC22D1;HSPB8;CLTC;DSTN;SHROOM3;ACTN4;EEF2;YWHAZ;RTN4;STRN3;HSPD1;EEF1A1;RCAN1;GJA1;UBL3;MYH9;QK;ARIH1;PAIP2
Huntington's disease DOID-12858 mouse GSE3248 sample 723	15/263	0.0183043	0.21939	0	0	1.83095	7.32495	NSF;ERDR1;DAB2IP;DSTN;ANK3;STRN3;HSPD1;EEF1A1;ABLIM1;TRIM28;UBE2R2;REV3L;TOP1;SGK1;PAFAH1B1
Neurofibromatosis DOID-8712 mouse GSE1482 sample 668	14/240	0.0186408	0.220276	0	0	1.87266	7.45768	MACF1;HSPA8;SPARC;HSP90AB1;DSTN;ANK3;SIPA1L2;IGF1R;UBL3;ARPC2;UBE2R2;AGO2;ANXA6;PAFAH1B1
cerebral palsy DOID-1969 human GSE31243 sample 878	17/312	0.0188254	0.219368	0	0	1.74919	6.94873	DARS;HSPA8;SPARC;TSC22D1;TPM3;FN1;ANK2;RPSA;COX5A;PNRC1;ENAH;EEF1A1;PPM1B;DEPTOR;PALLD;ALPK3;ATF4
Severe acute respiratory syndrome (SARS) C1175175 human GSE1739 sample 165	12/195	0.0194446	0.22348	0	0	1.97555	7.78404	EEF1A1;EGR1;CCND3;LASP1;SPARC;RAB31;TSC22D1;SLC2A3;ENO1;TYMS;SORL1;ATF4
schizophrenia DOID-5419 human GSE21935 sample 854	17/314	0.0198945	0.22556	0	0	1.73805	6.80847	RAP1GAP2;MACF1;HSP90AB1;IQSEC1;RPSA;FGF1;EEF2;AKAP12;EEF1A1;STK24;KIT;MXI1;WAC;PKP4;MALAT1;ANP32B;YWHAG
Insulin Resistance DOID-9352 human GSE36297 sample 581	16/290	0.0200436	0.224221	0	0	1.77119	6.92506	NSF;HSPA8;SPARC;PFKFB3;FN1;RPSA;RTN4;TTN;EEF1A1;GJA1;DEPTOR;ARPC2;REV3L;SGK1;TNS1;ATF4
amyotrophic lateral sclerosis DOID-332 mouse GSE10953 sample 679	24/491	0.0204638	0.22591	0	0	1.56918	6.10268	HSP90AA1;SPARC;ERDR1;TSC22D1;ZMYND8;ACSL6;TIMM23;RPSA;LARP4B;COX5A;TMEM131;RTN4;HSPD1;EEF1A1;GJA1;UBL3;CFDP1;ARPC2;PRX;MALAT1;PAIP2;EIF3A;YWHAG;ATF4
Depression 1596 human GSE12654 sample 462	16/291	0.0206235	0.224716	0	0	1.7651	6.85092	HSP90AA1;SPARC;TSC22D1;DSTN;SLC2A3;ENO1;EEF2;TMEM131;RTN4;ETV5;EEF1A1;ABR;CTIF;ABLIM1;ARPC2;SYT11
Nemaline Myopathy C0206157 mouse GSE3384 sample 78	19/366	0.0213299	0.229433	0	0	1.66654	6.41224	HSPA8;HSP90AB1;TSC22D1;AHNAK;TPM3;HSPB8;CUL1;LARP4B;HSPE1;RTN4;STRN3;HSPD1;NCOR2;EEF1A1;RCAN1;QK;ARIH1;PAIP2;ATF4
nicotine dependence DOID-0050742 human GSE6264 sample 582	19/370	0.0235422	0.250024	0	0	1.64852	6.18023	DARS;MAP2K1;HSP90AA1;PFKFB3;FNBP1;COG5;CLTC;ENO1;IQGAP1;TYMS;EEF2;HSPD1;EEF1A1;SLTM;ANXA6;WAC;B3GNT2;YWHAG;MCM2
colon carcinoma DOID-1520 mouse GSE422 sample 651	21/421	0.0237886	0.249483	0	0	1.60132	5.98663	MACF1;HSPA8;HSP90AB1;AHNAK;TSC22D1;FN1;TIMM23;LAMC2;LITAF;YWHAZ;TMEM131;RTN4;HSPD1;EEF1A1;GJA1;MYH9;PKP4;TAB2;TOP1;ANP32B;YWHAG
Type 2 diabetes mellitus C0011860 human GSE12643 sample 274	18/346	0.0241311	0.249951	0	0	1.67008	6.21981	ST8SIA1;IDH1;NMNAT2;RBPJ;TYMS;PDS5A;LITAF;MID1;PNRC1;TTN;EPS8;GJA1;RPS6KA2;SP3;REV3L;TBL1X;BCAT1;PTGES
GERD - Gastro-esophageal reflux disease C0017168 human GSE2144 sample 27	18/346	0.0241311	0.246903	0	0	1.67008	6.21981	TGIF1;HSPA8;AHNAK;FN1;DSTN;LAMC2;PTPRK;YWHAZ;FBXL12;EXT1;AKAP12;PALLD;DNAJA2;FAT1;MYH9;TRIM16;TNFRSF21;PTGES
Huntington's disease DOID-12858 mouse GSE3248 sample 726	19/372	0.024712	0.2498	0	0	1.63966	6.06749	MACF1;HSPA8;SNAP47;CREBBP;HSP90AB1;DSTN;EEF2;IGF1R;HSPD1;EEF1A1;ARPC2;SP3;REV3L;NCAM1;MAPT;SGK1;PAIP2;SRSF11;PAFAH1B1
Cardiac Failure C0018801 mouse GSE1988 sample 273	15/275	0.0260385	0.260075	0	0	1.75106	6.38817	EGR1;SPARC;VWF;UBXN2A;DSTN;EEF2;RTN4;TTN;ENAH;EEF1A1;PPM1B;ABLIM1;ALPK3;ANP32B;SPTAN1
endometrial cancer DOID-1380 human GSE17025 sample 845	17/327	0.028015	0.276524	0	0	1.66895	5.96652	HSPA8;HSP90AA1;HSP90AB1;ENO1;HSPE1;YWHAZ;HSPD1;LASP1;DEPTOR;ARPC2;CCDC6;COX1;NCOA7;RHPN2;TOP1;KANK4;YWHAG
amyotrophic lateral sclerosis DOID-332 mouse GSE3343 sample 685	9/138	0.0288937	0.281881	0	0	2.09366	7.42019	EEF1A1;GSK3B;HSP90AA1;DDC;AGO2;MALAT1;ANK3;SGK1;XKR6
Down syndrome DOID-14250 human GSE19681 sample 1066	15/280	0.0298948	0.288295	0	0	1.71979	6.03658	EGR1;HSPA8;HSP90AB1;TSC22D1;TESC;CDC5L;SLC2A3;EEF2;CDYL2;PNRC1;EEF1A1;COX1;MALAT1;SGK1;YWHAG
endometrial cancer DOID-1380 human GSE17025 sample 843	16/305	0.0301479	0.287433	0	0	1.68408	5.89703	HSPA8;LYPLA1;HSP90AA1;HSP90AB1;ENO1;COX5A;YWHAZ;HSPD1;DEPTOR;ARPC2;CCDC6;COX1;NCOA7;TOP1;KANK4;YWHAG
endometrial cancer DOID-1380 human GSE17025 sample 842	16/305	0.0301479	0.284203	0	0	1.68408	5.89703	HSPA8;HSP90AA1;PFKFB3;HSP90AB1;ENO1;EEF2;YWHAZ;ARPC2;FAT1;ARHGEF3;CCDC6;COX1;TOP1;BCAT1;YWHAG;ATF4
Fracture of femur C0015802 rat GSE1685 sample 240	21/432	0.0303251	0.282697	0	0	1.56055	5.45534	EGR1;HSPA8;HSP90AA1;HSP90AB1;SPARC;AHNAK;TSC22D1;CLTC;FN1;RPSA;ENO1;EEF2;HSPE1;LITAF;YWHAZ;HSPD1;EEF1A1;FAT1;TNS3;SRSF11;YWHAG
rheumatoid arthritis DOID-7148 human GSE10500 sample 779	13/232	0.0303594	0.279907	0	0	1.79886	6.28639	TGIF1;HSP90AA1;TSC22D1;FN1;SLC2A3;ENO1;RBPJ;HIPK1;RTN4;HSPD1;EEF1A1;SGK1;ATF4
Down syndrome DOID-14250 human GSE16677 sample 1064	19/381	0.0305306	0.278426	0	0	1.60092	5.58566	ANKRD28;EGR1;HSPA8;LYPLA1;HSP90AB1;ANP32A;RPSA;ENO1;TYMS;EEF2;YWHAZ;EEF1A1;TRIM28;KIT;COX1;MALAT1;ANP32B;SGK1;MCM2
Rett Syndrome C0035372 human GSE6955 sample 390	19/381	0.0305306	0.275432	0	0	1.60092	5.58566	RAP1GAP2;NTRK2;ANP32A;AUTS2;CCDC57;ENO1;PTPRK;NMNAT2;EEF2;PCDHGA9;ABR;CTIF;SEPT9;GJA1;CDH4;ABLIM1;RAB31;PALLD;SYT11
Huntington's disease DOID-12858 mouse GSE26001 sample 719	15/281	0.0307139	0.274138	0	0	1.71367	5.96878	ZFP654;TCF7L1;ZFP869;ERDR1;MTMR12;ZFP704;SRC;IDH1;PDGFA;IRAK3;CELSR1;STK24;ZMAT4;PIEZO1;ZSWIM3
systemic lupus erythematosus DOID-9074 human GSE13887 sample 450	18/357	0.0315442	0.278585	0	0	1.61862	5.59456	CX3CR1;EGR1;HSP90AA1;PFKFB3;WTAP;RPSA;SLC2A3;YWHAZ;RTN4;RAB31;SLTM;ARPC2;COX1;NCOA7;ANP32B;DENND6A;SGK1;SRSF11
neurofibromatosis DOID-8712 mouse GSE1482 sample 666	15/282	0.0315495	0.275729	0	0	1.70759	5.90178	HSPA8;HSP90AA1;HSP90AB1;ERDR1;CLTC;ANK3;YWHAZ;EPN1;PCDHGA10;NCOR2;UBL3;ARPC2;CAPZB;SGK1;YWHAG
Diabetic Nephropathy C0011881 human GSE1009 sample 223	11/186	0.0316563	0.27381	0	0	1.89855	6.55535	EEF1A1;ARVCF;ST5;STARD8;SLCO2A1;PECAM1;TACC1;ENO1;TRIM16;SGK1;SYN1
nephronophthisis DOID-12712 mouse GSE6113 sample 942	16/307	0.0317371	0.271708	0	0	1.67311	5.77267	SRRM2;SPARC;HSP90AB1;TSC22D1;FN1;DAB2IP;LITAF;PCDHGA10;ADAM19;SPTLC2;ARPC2;CAPZB;ANXA6;PIEZO1;MYH9;YWHAG
Osteolysis C0029435 human GSE755 sample 128	16/307	0.0317371	0.268964	0	0	1.67311	5.77267	HSPA8;LYPLA1;HSP90AA1;RNGTT;ENO1;PTPRK;HSPE1;COX5A;RTN4;SEPT9;CCND3;TRIM28;ARPC2;CCPG1;ST5;PIEZO1
Schizophrenia C0036341 human GSE12649 sample 261	18/358	0.0322937	0.270944	0	0	1.6141	5.54103	NTRK2;HSP90AA1;GGNBP2;TSC22D1;HSPB8;RPSA;ANK3;PTPRK;EEF2;PRRC2B;EEF1A1;DPP6;ZMIZ1;EIF3H;MAPT;SGK1;ERC2;SH3GL2
Dystonia C0393593 human GSE3064 sample 329	15/283	0.0324016	0.269157	0	0	1.70156	5.83558	HSPA8;HSP90AA1;SPARC;PFKFB3;CTBP2;HSPB8;FGF1;LITAF;SORL1;HSPD1;EEF1A1;SEPT9;GJA1;RAB31;ATF4
Gamma-hydroxybutyric acidaemia C0268631 mouse GSE2866 sample 409	19/384	0.0326814	0.26882	0	0	1.58842	5.43389	NSF;MACF1;SNAP47;CLTC;TIMM23;AP3B1;SPPL3;NUDT3;IGF1R;PCDHGA10;SEPT9;GJA1;TRIM28;SYT11;RPS6KA2;IGF2BP2;JARID2;DLGAP4;PAFAH1B1
schizophrenia DOID-5419 human GSE17612 sample 853	16/309	0.0333872	0.27196	0	0	1.66228	5.65105	HSPA8;NTRK2;HSP90AA1;HSP90AB1;TSC22D1;EEF2;AKAP12;GJA1;UBE2R2;MXI1;ARHGEF3;MALAT1;ANP32B;SH3GL2;ATF4;MAP4K4
COPD - Chronic obstructive pulmonary disease C0024117 human GSE1650 sample 36	20/412	0.0343639	0.277224	0	0	1.55838	5.25292	HSPA8;HSP90AB1;SPARC;VWF;TSC22D1;FN1;RPSA;ACTN4;EEF2;SORL1;RTN4;EEF1A1;SEPT9;CCND3;RAB31;ARPC2;GSTA4;CRTAC1;PALLD;ANXA6
nemaline myopathy DOID-3191 mouse GSE3384 sample 973	20/412	0.0343639	0.274584	0	0	1.55838	5.25292	HSP90AB1;SPARC;AHNAK;TPM3;TIMM23;EEF2;MAPK14;YWHAZ;EEF1A1;RCAN1;UBL3;ARPC2;TRIM28;UBE2R2;ANXA6;CCDC6;DYM;TAB2;RAF1;ATF4
nemaline myopathy DOID-3191 mouse GSE3384 sample 975	18/361	0.0346213	0.274031	0	0	1.60069	5.38358	HSPA8;HSP90AB1;HSPB8;TIMM23;RTN4;IGF1R;STRN3;HSPD1;NCOR2;RCAN1;UBL3;RPS6KA2;SMYD1;ARIH1;MAPT;SGK1;YWHAG;ATF4
Status Epilepticus C0038220 rat GSE4236 sample 391	17/336	0.0349398	0.273967	0	0	1.62425	5.44793	EGR1;HSPA8;HSP90AA1;SPARC;HSP90AB1;TSC22D1;CLTC;PCDHGA1;RPSA;ENO1;EEF2;HSPD1;EEF1A1;GJA1;SGK1;SRSF11;YWHAG
Myocardial Infarction C0027051 rat GSE4105 sample 437	17/336	0.0349398	0.271431	0	0	1.62425	5.44793	SPARC;HSP90AB1;AHNAK;FN1;DSTN;RPSA;ENO1;EEF2;LITAF;YWHAZ;EEF1A1;RCAN1;ARPC2;CAPZB;ALPK3;ANP32B;SPTAN1
Hypertrophy, Left Ventricular C0149721 rat GSE2116 sample 248	15/287	0.0359785	0.276936	0	0	1.67784	5.57855	DARS;HSP90AA1;TESC;RPSA;ENO1;FGF1;EEF2;COX5A;EEF1A1;PPM1A;DNAJA2;PECAM1;COX1;PIGL;YWHAG
Cardiac Hypertrophy C1383860 mouse GSE1621 sample 51	15/287	0.0359785	0.274418	0	0	1.67784	5.57855	SPARC;ERDR1;HSPB8;SHROOM3;EEF2;YWHAZ;RTN4;ENAH;EEF1A1;RCAN1;ARPC2;TNIP1;TSPAN9;MYH9;SPTAN1
Bipolar Disorder C0005586 human GSE7036 sample 181	16/312	0.0359789	0.271949	0	0	1.64629	5.47363	DARS;SNAP47;LYPLA1;HSP90AB1;EED;RPSA;ARHGAP17;ENO1;TYMS;EEF2;HSPE1;PNRC1;SEPT9;CAPZB;EIF3H;SRSF11
nasopharynx carcinoma DOID-9261 human GSE12452 sample 778	12/214	0.0363473	0.27228	0	0	1.80015	5.96685	EXT1;FHOD3;PRTG;GJA1;SPARC;HSP90AB1;KIT;FN1;ELOVL6;ENO1;DDX60;MCM2
hepatocellular carcinoma DOID-684 human GSE39791 sample 663	12/214	0.0363473	0.269871	0	0	1.80015	5.96685	CEMIP;HSP90AA1;SPARC;HSP90AB1;SH3PXD2A;VWF;TSHZ2;SLCO2A1;FAT1;PECAM1;CDC5L;AP3B1
Oligodendroglioma C0028945 human GSE2223 sample 116	15/289	0.0378705	0.278713	0	0	1.66623	5.45455	CASP8AP2;NTRK2;TCF7L1;SPARC;TENM4;UHRF1;PVT1;MSI2;MCC;PTPRG;RAB31;REV3L;SCAP;TAB2;BMPR1A
Hypertrophy, Left Ventricular C0149721 mouse GSE2459 sample 382	15/289	0.0378705	0.27629	0	0	1.66623	5.45455	HSP90AA1;SPARC;HSP90AB1;AHNAK;HSPB8;SORBS1;EEF2;YWHAZ;PNRC1;EEF1A1;RCAN1;CCND3;TNIP1;ANP32B;CUEDC1
endometriosis DOID-289 human GSE6364 sample 946	12/216	0.0385914	0.279122	0	0	1.78348	5.80476	EEF1A1;EGR1;HSPA8;GJA1;HSP90AA1;TRIM28;FN1;COX1;RPSA;ANP32B;TYMS;ATF4
Infection by Yersinia enterocolitica C0238528 mouse GSE2973 sample 127	16/316	0.0396584	0.284388	0	0	1.62545	5.24608	TGIF1;EGR1;HSP90AA1;SPARC;SGMS1;JMJD1C;ELL2;FBXO11;RTN4;RABGEF1;RCAN1;B3GNT2;MALAT1;TOP1;SGK1;MAP4K3
cerebral palsy DOID-1969 human GSE31243 sample 503	15/291	0.039833	0.28322	0	0	1.65478	5.33345	DARS;SPARC;TSC22D1;TPM3;FN1;RPSA;COX5A;PNRC1;ENAH;EEF1A1;DEPTOR;PALLD;ALPK3;CTNNAL1;ATF4
cerebral palsy DOID-1969 human GSE31243 sample 877	15/291	0.039833	0.28084	0	0	1.65478	5.33345	DARS;SPARC;TPM3;HSPB8;FN1;RPSA;PNRC1;TTN;ENAH;EEF1A1;RCAN1;PALLD;ALPK3;CTNNAL1;ATF4
Gamma-hydroxybutyric acidaemia C0268631 mouse GSE2866 sample 205	15/292	0.0408412	0.285548	0	0	1.64911	5.27397	MACF1;HSPA8;ANP32A;CLTC;TIMM23;DSTN;HSPE1;RTN4;IGF1R;GJA1;UBL3;AGO2;JARID2;TNRC6A;KDM6A
Huntington's disease DOID-12858 mouse GSE5786 sample 721	18/369	0.0414302	0.287272	0	0	1.56599	4.9857	CDK17;EGR1;HSPA8;MAP2K1;HSP90AA1;HSP90AB1;TSC22D1;ITPR1;ACTN4;SYN1;GJA1;ARPC2;AGO2;B3GNT2;PKP4;MALAT1;ANP32B;SGK1
Asthma C0004096 human GSE4302 sample 318	13/243	0.0416133	0.286176	0	0	1.71743	5.46029	TCF7L1;SPARC;SPATS1;VWA3B;TYMS;GJA1;CFDP1;KANSL1;RPS6KA2;ZMAT4;KIT;COX1;SGK1
Primary pulmonary hypoplasia C0456891 mouse GSE1363 sample 20	14/270	0.04411	0.30088	0	0	1.66459	5.19529	ERDR1;PDGFA;DSTN;EEF2;SPPL3;EPN1;PCDHGA10;NCOR1;TRIM28;MOB2;ANXA6;RALY;IGF2BP2;RAF1
Essential Thrombocytemia C0040028 human GSE2006 sample 434	20/426	0.0458837	0.310455	0	0	1.50717	4.64456	VWF;TSC22D1;DSTN;RPSA;ENO1;YWHAZ;RTN4;PPM1A;CCND3;STK24;ARPC2;CAPZB;XPNPEP1;PDGFC;PECAM1;MYH9;RALY;IGF2BP2;ANP32B;ATF4
Type 1 diabetes mellitus C0011854 mouse GSE2254 sample 204	19/400	0.0460927	0.309374	0	0	1.52488	4.69221	HSPA8;HSP90AA1;HSP90AB1;SPARC;ERDR1;CLTC;CUL1;TIMM23;EEF2;LITAF;GGTA1;RTN4;HSPD1;EEF1A1;TRIM28;CCDC6;ANP32B;YWHAG;ATF4
endometrial cancer DOID-1380 human GSE17025 sample 841	14/272	0.0464052	0.309	0	0	1.65235	5.07327	HSPA8;HSP90AA1;CTBP2;ENO1;YWHAZ;LASP1;FAT1;ARHGEF3;CCDC6;COX1;RHPN2;TOP1;BCAT1;KANK4
multiple myeloma DOID-9538 human GSE6691 sample 787	21/454	0.0473304	0.312679	0	0	1.48493	4.52992	ATF1;TCERG1;HSPA8;LYPLA1;MAP2K1;HSP90AB1;GALNT2;DSTN;CD2AP;HSPD1;QTRT1;CDK7;DEPTOR;CCPG1;PDGFC;SP3;KIT;MXI1;CDC37L1;EIF3H;MAP4K3
anaplastic thyroid carcinoma UMLS CUI-C0238461 human GSE65144 sample 654	16/324	0.0478168	0.313424	0	0	1.58532	4.81997	HSPA8;HSP90AA1;SPARC;FN1;RPSA;ENO1;RBPJ;RTN4;LASP1;RAB31;ARPC2;COX1;SGK1;BCAT1;YWHAG;RAI14
colorectal cancer DOID-9256 human GSE1323 sample 763	17/351	0.0491469	0.319645	0	0	1.55483	4.68462	CEMIP;TESC;TIMM23;TYMS;EEF2;SEPT9;CCND3;LASP1;STK24;ARPC2;MYH9;SH3BP4;EIF3H;ANP32B;TNS3;ATF4;MCM2
myelodysplastic syndrome DOID-0050908 human GSE19429 sample 749	15/300	0.0495697	0.319915	0	0	1.60514	4.82243	ANKRD28;EGR1;SPARC;DSTN;ENO1;EEF2;LITAF;SORL1;RTN4;ARPC2;PDGFC;KIT;EIF3H;NCOA7;MALAT1
nasopharynx carcinoma DOID-9261 human GSE12452 sample 774	12/225	0.0498982	0.319577	0	0	1.71215	5.13262	EXT1;FHOD3;PGAP1;SPARC;UHRF1;IDH1;KIT;FN1;DLEU2;DDX60;RAI14;MCM2
SCID - Severe combined immunodeficiency C0085110 mouse GSE3414 sample 201	15/301	0.0507457	0.322543	0	0	1.5998	4.7689	EGR1;HSPA8;SPARC;FN1;YWHAZ;AKAP2;FAM129B;UBL3;SH3PXD2A;FAT1;PKP4;ANP32B;TNS3;SPTAN1;TNS1
Idiopathic fibrosing alveolitis C0085786 human GSE10921 sample 272	12/226	0.0512805	0.323491	0	0	1.70457	5.06333	AKAP12;CEMIP;DEPTOR;SMAD3;TSC22D1;PALLD;FAT1;SH3BP4;CDYL;EEF2;YWHAZ;TBX3
endometrial cancer DOID-1380 human GSE17025 sample 846	15/302	0.051941	0.325213	0	0	1.59451	4.71599	HSPA8;HSP90AA1;HSP90AB1;ENO1;HSPE1;YWHAZ;HSPD1;PPM1B;ABLIM1;ARPC2;CCDC6;COX1;TOP1;KANK4;YWHAG
Anaplasmosis C0002797 human GSE2600 sample 21	12/227	0.0526885	0.32745	0	0	1.69706	4.99506	EEF1A1;HSPA8;GJA1;LASP1;HSP90AA1;TRIM28;MOK;RPSA;SRSF11;YWHAG;ATF4;HSPD1
cellular phase chronic idiopathic myelofibrosis 8106 human GSE3410 sample 460	18/382	0.054482	0.336106	0	0	1.51269	4.40177	ANKRD28;MACF1;HSP90AB1;TSC22D1;AHNAK;VWF;EEF2;SORL1;RTN4;PNRC1;DEPTOR;ZMIZ1;PDGFC;ARHGEF3;PIEZO1;EIF3H;ANP32B;TNS3
osteoarthritis DOID-8398 human GSE16464 sample 751	12/229	0.0555828	0.340394	0	0	1.68224	4.86147	EEF1A1;GJA1;HSP90AA1;PFKFB3;MXI1;FN1;COX1;MALAT1;ENO1;BCAT1;ELL2;SRSF11
endometriosis DOID-289 human GSE6364 sample 945	14/282	0.0591379	0.359542	0	0	1.59375	4.50694	EGR1;HSPA8;LYPLA1;HSP90AA1;SPARC;HSPE1;YWHAZ;RTN4;EEF1A1;GJA1;RAB31;ARPC2;COX1;CTNNAL1
cervical cancer DOID-4362 human GSE9750 sample 619	16/335	0.0608721	0.367422	0	0	1.53326	4.29158	HSP90AA1;HSP90AB1;ENO1;ACTN4;TYMS;EEF2;COX5A;HSPD1;TRIM28;FAT1;PIEZO1;EIF3H;ANP32B;SAE1;ATF4;MCM2
Huntington's disease DOID-12858 mouse GSE3621 sample 702	15/311	0.0635858	0.381061	0	0	1.54836	4.26631	TCERG1;HSPA8;HSP90AB1;WTAP;DSTN;INO80;EEF2;FBXO11;HSPD1;FAT1;EPC2;QRICH1;TACC2;SGK1;PAIP2
nemaline myopathy DOID-3191 mouse GSE3384 sample 970	18/390	0.063816	0.379728	0	0	1.48166	4.07717	MACF1;HSP90AB1;SPARC;AHNAK;HSPB8;CLTC;LARP4B;RTN4;NCOR2;RCAN1;PPM1B;PHKG1;TRIM28;SMYD1;ARIH1;RAF1;YWHAG;ATF4
autism spectrum disorder DOID-0060041 human GSE25507 sample 1028	13/261	0.065853	0.389089	0	0	1.59899	4.34977	CX3CR1;EGR1;HSPA8;USP10;NOSIP;RPSA;YWHAZ;PNRC1;ABLIM1;EIF3H;COX1;MALAT1;SGK1
bronchopulmonary dysplasia UMLS CUI-C0006287 human GSE8586 sample 918	12/236	0.0665471	0.390441	0	0	1.63234	4.42339	DARS;HSPA8;GJA1;LASP1;HSP90AA1;HSP90AB1;MXI1;DSTN;COX1;IQGAP1;LITAF;HSPD1
retinoblastoma DOID-768 mouse GSE6787 sample 455	18/393	0.0675829	0.393764	0	0	1.47035	3.96172	ERDR1;TSC22D1;GALNT2;DSTN;AP3B1;EEF2;SPPL3;YWHAZ;RTN4;GJA1;ARPC2;UBE2R2;KIT;ANXA6;MYH9;JARID2;PAIP2;ATF4
Huntington's disease DOID-12858 human GSE3248 sample 724	14/288	0.067818	0.392409	0	0	1.56055	4.19932	NSF;MACF1;CREBBP;HSP90AA1;HSP90AB1;DSTN;NUDT3;HSPD1;EEF1A1;ST5;REV3L;NCAM1;SRSF11;YWHAG
hepatocellular carcinoma DOID-684 human GSE57957 sample 660	15/314	0.06783	0.38979	0	0	1.53357	4.12645	ALDH1L1;SPARC;HSP90AB1;VWF;IDH1;RPSA;EEF2;EEF1A1;SEPT9;LASP1;PALLD;MYH9;NCOA7;TACC1;TNS3
systemic lupus erythematosus DOID-9074 human GSE10325 sample 692	15/315	0.0692858	0.395447	0	0	1.5287	4.08089	CX3CR1;DARS;ENO1;DDX60;YWHAZ;PNRC1;GATAD2A;SEPT9;CCND3;STK24;ARPC2;ARHGEF3;TAB2;ZCCHC2;ATF4
Cardiomyopathy, Dilated C0007193 human GSE3586 sample 323	20/450	0.0716989	0.406455	0	0	1.42679	3.75999	SNAP47;HSPA8;HSP90AB1;SPARC;ATAD5;TESC;HSPB8;ELOVL6;FGF1;EEF2;RTN4;HSPD1;EEF1A1;GJA1;SMYD1;PIP5K1B;PAIP2;CCDC141;EIF3A;YWHAG
Hutchinson-Gilford progeria syndrome UMLS CUI-C0033300 mouse GSE32609 sample 984	13/265	0.0722919	0.407066	0	0	1.57485	4.1372	ALDH1L1;HSPB8;DSTN;IL6RA;ELL2;EEF1A1;SIK3;MALAT1;TAB2;ARIH1;SGK1;MPZL1;TNS1
Bipolar Disorder 3312 human GSE12654 sample 461	13/266	0.0739634	0.413702	0	0	1.56893	4.08579	HSPA8;HSP90AA1;SPARC;SLC2A3;ENO1;EEF2;RTN4;EEF1A1;ABLIM1;ARPC2;SYT11;ANXA6;JARID2
Chronic Lymphocytic Leukemia (Chronic B-lymphocytic leukemia) UMLS CUI-C0023434 human GSE26725 sample 745	12/241	0.0751896	0.417775	0	0	1.59848	4.13645	AKAP12;DGKG;GRAMD1B;IMMP2L;TESC;KMT2C;ATP2B4;TSPAN5;NOSIP;APBB2;MSI2;BCAT1
Ventricular hypertrophy C0340279 mouse GSE4678 sample 313	15/320	0.0768759	0.424335	0	0	1.50482	3.8607	FHOD3;EGR1;HSPB8;CLTC;FN1;ACTN4;RTN4;FAM129B;RCAN1;ABLIM1;TNIP1;TSPAN9;ANP32B;ACSS1;SPTAN1
colon adenoma DOID-0050912 mouse GSE422 sample 650	19/427	0.0769733	0.422095	0	0	1.42846	3.66299	TGIF1;HSP90AB1;AHNAK;SLC44A1;TSC22D1;ZMYND8;FN1;TIMM23;LAMC2;LITAF;RTN4;EEF1A1;GJA1;MYH9;TAB2;TOP1;ANP32B;YWHAG;BRD4
Breast cancer DOID-1612 mouse GSE24594 sample 616	12/242	0.0770003	0.419502	0	0	1.59187	4.08147	EEF1A1;SPARC;CFDP1;DEPTOR;HSP90AB1;CTBP2;ERDR1;IDH1;ELOVL6;RPSA;ANP32B;FGFR2
esophagus squamous cell carcinoma DOID-3748 human GSE63941 sample 658	10/192	0.0783665	0.42419	0	0	1.67202	4.25756	EEF1A1;HSP90AA1;HSP90AB1;EIF3H;RPSA;COX1;ENO1;ANP32B;HSPE1;HSPD1
familial hypercholesterolemia DOID-13810 human GSE6088 sample 907	15/321	0.0784567	0.421956	0	0	1.50013	3.81814	EGR1;FNBP1;NOSIP;RPSA;EEF2;EEF1A1;METTL23;LASP1;ABLIM1;KAT6A;MXI1;PCED1B;EIF3H;COX1;ANP32B
schizophrenia DOID-5419 human GSE12679 sample 543	14/295	0.0789649	0.421985	0	0	1.52352	3.86784	PFKFB3;TTYH2;WDR45;FBXO11;MANBAL;ETV5;GJA1;DEPTOR;RAB31;ST5;CCDC6;COX1;TNS3;KANK4
diabetic retinopathy DOID-8947 mouse GSE12610 sample 911	15/322	0.0800584	0.42512	0	0	1.49547	3.77606	SNAP47;PHC1;ERDR1;RPSA;ACTN4;SYN1;PCDHGA10;AKAP12;RIMS2;MALAT1;QRICH1;RAPGEF5;BCAT1;TNS3;SPTAN1
pancreatic cancer DOID-1793 human GSE16515 sample 475	17/376	0.0811207	0.428052	0	0	1.45145	3.64579	HSPA8;HSP90AA1;SPARC;HSP90AB1;FN1;ENO1;ACTN4;HSPE1;YWHAZ;RTN4;HSPD1;EPS8;ARPC2;FAT1;COX1;YWHAG;TNFRSF21
Hepatitis C infection C0019196 human GSE2067 sample 309	18/403	0.0812196	0.425895	0	0	1.43387	3.59987	DARS;HSP90AA1;TESC;CLTC;RPSA;SLC2A3;ACTN4;EEF2;LITAF;RTN4;SEPT9;LASP1;ZMIZ1;FAT1;EIF3H;MYH9;ANP32B;MAP4K4
Retinoschisis C0152439 mouse GSE5581 sample 146	18/404	0.082676	0.430839	0	0	1.43032	3.56554	SNAP47;RANBP3;ERDR1;USP10;IDH1;ACSL6;TIMM23;RPSA;PNRC1;UBL3;ARPC2;TRIM28;SCAP;TOP1;ANP32B;PAIP2;MAP4K3;WDTC1
hepatitis C DOID-1883 human GSE20948 sample 598	14/298	0.084084	0.435472	0	0	1.50818	3.73417	UHRF1;IDH1;RPSA;ENO1;EEF2;EEF1A1;GJA1;SCAF8;LCOR;COX1;NCOA7;ANP32B;ATF4;MCM2
Breast Cancer C0006142 mouse GSE2528 sample 28	14/299	0.0858362	0.44182	0	0	1.50314	3.69068	TGIF1;HSPA8;CTBP2;WWC1;DSTN;SHROOM3;ACTN4;EEF2;LITAF;KIT;SGK1;PAIP2;ACSS1;SPTAN1
Essential Hypertension C0085580 rat GSE1675 sample 412	14/299	0.0858362	0.439126	0	0	1.50314	3.69068	ALDH1L1;HSP90AA1;HSP90AB1;TSC22D1;IQSEC1;IDH1;RPSA;ENO1;EEF2;YWHAZ;HSPD1;GSTA4;DNAJA2;FAT1
melanoma DOID-1909 human GSE6887 sample 951	11/221	0.0860126	0.437361	0	0	1.59787	3.92	ATAD5;UBXN2A;WWC1;CHEK1;KIT;TLK1;ANK2;CTNNAL1;YWHAG;CD2AP;CCNJL
acute myocardial infarction DOID-9408 mouse GSE775 sample 1004	14/301	0.0894098	0.451897	0	0	1.49315	3.60525	SPARC;AHNAK;CLTC;FN1;DSTN;SHROOM3;YWHAZ;RTN4;EEF1A1;RCAN1;TRIM28;ARPC2;TSPAN9;MYH9
Ventilator-associated lung injury C0340257 mouse GSE2411 sample 355	15/328	0.0901125	0.452721	0	0	1.46811	3.5333	HSPA8;HSP90AA1;TIMM23;LITAF;SORL1;RTN4;FAM129B;HSPD1;AKAP12;CFDP1;ARPC2;SGK1;PAIP2;MAP4K3;ATF4
polycystic ovary syndrome DOID-11612 human GSE34526 sample 797	17/382	0.0904502	0.451712	0	0	1.42866	3.433	EGR1;HSP90AB1;RPSA;SLC2A3;IQGAP1;EEF2;LITAF;SORL1;GLT1D1;RAB31;GSTA4;ARPC2;CAPZB;MXI1;ANXA6;MALAT1;ATF4
Diamond-Blackfan anaemia DOID-1339 human GSE14335 sample 472	17/382	0.0904502	0.44904	0	0	1.42866	3.433	TGIF1;EGR1;PFKFB3;ATP2B4;IRAK3;RBPJ;MCC;TBX3;RELB;EXT1;AKAP12;MAPT;ROR2;ZCCHC2;TNFRSF21;PTGES;RAI14
Vulvar intraepithelial tumor UMLS CUI-C0346210 human GSE5563 sample 967	15/330	0.0936337	0.46211	0	0	1.45921	3.45595	HSPA8;LYPLA1;HSP90AA1;DSTN;ENO1;TYMS;DDX60;HSPE1;YWHAZ;ARPC2;ANP32B;SGK1;YWHAG;ATF4;MCM2
Chronic phase chronic myelogenous leukemia DOID-8552 human GSE5550 sample 456	15/330	0.0936337	0.459408	0	0	1.45921	3.45595	YES1;ZMYND8;RBPJ;YWHAZ;RTN4;CRKL;CDK7;RAB31;CCDC6;PIP5K1B;TBL1X;BCAT1;RREB1;EIF3A;BRD4
Muscular Dystrophy C0026850 mouse GSE2507 sample 405	13/278	0.0959743	0.468154	0	0	1.50121	3.51834	MACF1;SPARC;HSP90AB1;ERDR1;TSC22D1;AHNAK;HSPB8;DSTN;HSPD1;EEF1A1;RCAN1;GJA1;SMYD1
Bone fracture C0016658 rat GSE594 sample 275	16/359	0.097284	0.471799	0	0	1.43076	3.33385	EGR1;HSPA8;SPARC;HSP90AB1;TSC22D1;AHNAK;CLTC;FN1;RPSA;ENO1;EEF2;HSPE1;LITAF;YWHAZ;EEF1A1;ANXA6
Anterior Horn Cell Disease C0154681 human GSE1481 sample 208	12/254	0.100888	0.486467	0	0	1.51666	3.47883	CX3CR1;NTRK2;CEMIP;HSP90AA1;HSP90AB1;IGSF3;GSTA4;PDGFC;RPSA;HSPE1;PCDHGA9;HSPD1
Nicotine addiction C0028043 human GSE11208 sample 325	6/103	0.102573	0.491764	0	0	1.87006	4.25847	EEF1A1;EGR1;HSPA8;HSP90AB1;RPSA;COX1
Papillary Carcinoma of the Thyroid C0238463 human GSE3678 sample 306	14/308	0.102645	0.489312	0	0	1.45921	3.32188	SPARC;TSC22D1;FN1;PDGFA;RAB27A;IQGAP1;EEF2;ETV5;EPS8;EEF1A1;TIAM1;PDGFC;COX1;IGF2BP2
Down syndrome DOID-14250 human GSE19681 sample 1065	15/335	0.10281	0.487329	0	0	1.43744	3.26999	ANKRD28;EGR1;HSPA8;HSP90AB1;ANP32A;PVT1;RPSA;ENO1;EEF2;YWHAZ;EEF1A1;KIT;MALAT1;SGK1;BCAT1
Peripheral motor neuropathy C0235025 mouse GSE1947 sample 104	12/256	0.105258	0.496132	0	0	1.50482	3.38785	EEF1A1;HSPA8;CCND3;HSP90AA1;HSP90AB1;ERDR1;MAPT;SGK1;LITAF;YWHAG;TNFRSF21;HSPD1
Nutritional deficiency, NEC C0267975 mouse GSE1776 sample 422	11/230	0.105941	0.496562	0	0	1.53535	3.44666	EEF1A1;HSPA8;ERDR1;HSPB8;RPSA;RALY;ANP32B;EEF2;HSPE1;ATF4;HSPD1
Huntington's disease DOID-12858 mouse GSE3248 sample 722	14/312	0.110715	0.516057	0	0	1.44051	3.17026	MACF1;CREBBP;HSP90AA1;ERDR1;DSTN;SPPL3;EEF1A1;GJA1;ARPC2;EPC1;MAPT;TOP1;SGK1;TNRC6A
Alexander Disease C0270726 mouse GSE977 sample 87	13/286	0.112662	0.522231	0	0	1.45921	3.18599	CX3CR1;MACF1;SPARC;AHNAK;HSPB8;SHROOM3;SORBS1;EEF1A1;CCND3;ARPC2;CAPZB;QK;SGK1
Nephroblastoma C0027708 human GSE2712 sample 418	9/181	0.113375	0.522648	0	0	1.59627	3.47516	SALL1;TRIM28;ZMIZ1;PDGFC;EIF3H;RPSA;EEF2;JARID2;MCM2
Malignant Melanoma C0025202 human GSE4587 sample 326	15/342	0.11655	0.534346	0	0	1.40801	3.02644	ANKRD28;HSP90AA1;HSP90AB1;FN1;HSPE1;EPS8;UBL3;PDGFC;MXI1;EIF3H;MALAT1;SGK1;TNS3;YWHAG;TNFRSF21
Neurological pain disorder C0423704 rat GSE2636 sample 129	12/262	0.119028	0.542741	0	0	1.47035	3.1295	EEF1A1;SPARC;AHNAK;IDH1;COX1;NCAM1;ENO1;FOXN3;EEF2;TNS3;LITAF;TNFRSF21
endometrial cancer DOID-1380 human GSE17025 sample 839	13/289	0.119334	0.541196	0	0	1.44407	3.06984	HSPA8;HSP90AA1;HSP90AB1;ENO1;YWHAZ;HSPD1;LASP1;ARPC2;COX1;NCOA7;E2F3;TOP1;YWHAG
Systemic lupus erythematosus (SLE) C0024141 human GSE12374 sample 123	15/344	0.120666	0.544296	0	0	1.39983	2.96025	ATF1;EPHA4;KLF12;ATAD5;FNBP1;EED;ANKRD11;IDH1;GRIK3;GAB1;FGF1;NUDT3;ST5;SP3;ARIH1
autism spectrum disorder DOID-0060041 human GSE25507 sample 1030	14/317	0.121321	0.54432	0	0	1.41779	2.99056	HSPA8;USP10;CLTC;IQGAP1;LITAF;YWHAZ;SORL1;EEF1A1;RAB31;ARPC2;PECAM1;EIF3H;TRIP12;ATF4
facioscapulohumeral muscular dystrophy DOID-11727 human GSE15090 sample 540	16/372	0.121726	0.543234	0	0	1.38076	2.90786	SPARC;HSPB8;FN1;DSTN;IQGAP1;SORBS1;YWHAZ;PNRC1;TTN;EEF1A1;GJA1;ABLIM1;ARPC2;SMYD1;MALAT1;SLC25A12
Cardiac Hypertrophy C1383860 rat GSE1055 sample 354	7/133	0.122096	0.542004	0	0	1.68962	3.55317	EEF1A1;TSC22D1;EIF3H;RPSA;COX1;PGPEP1;COX5A
Hypertension C0020538 mouse GSE1674 sample 400	14/318	0.12351	0.545394	0	0	1.41333	2.95588	HSPA8;HSP90AA1;AHNAK;DSTN;EEF2;HSPE1;STRN3;HSPD1;UBL3;ARPC2;RALY;ARIH1;SRSF11;FGFR2
Schizophrenia C0036341 human GSE4036 sample 357	13/291	0.123906	0.544278	0	0	1.43414	2.99482	RAP1GAP2;EGR1;HSP90AA1;TSC22D1;PCDHGA4;ITPR1;ANK3;HSPD1;ABLIM1;TRIM28;MXI1;COX1;MALAT1
prostate cancer DOID-10283 human GSE30174 sample 866	18/430	0.12658	0.553128	0	0	1.34384	2.77755	CX3CR1;HSPA8;HSP90AA1;PPP1R12A;RPSA;IQGAP1;FOXN2;YWHAZ;RTN4;EEF1A1;ARPC2;MXI1;EIF3H;COX1;MALAT1;ANP32B;PAIP2;ATF4
testis seminoma DOID-5842 human GSE8607 sample 624	9/186	0.12786	0.555826	0	0	1.55336	3.19498	EEF1A1;LASP1;HSP90AB1;TRIM28;SLC2A3;ENO1;EEF2;ETV5;HSPD1
Type 2 diabetes mellitus C0011860 mouse GSE642 sample 320	13/294	0.130948	0.566318	0	0	1.41951	2.88579	DDC;ANP32A;TSC22D1;IDH1;CLTC;TIMM23;EEF2;RCAN1;UBL3;TSPAN9;MYH9;SGK1;ACSS1
esophagus adenocarcinoma DOID-4914 human GSE1420 sample 644	14/322	0.132494	0.570064	0	0	1.39577	2.82116	HSP90AA1;SPARC;HSP90AB1;TSC22D1;TESC;IDH1;RPSA;ACTN4;PTPRK;LITAF;HSPD1;SEPT9;LASP1;TNFRSF21
MDS - Myelodysplastic syndrome C0026986 human GSE4619 sample 206	13/295	0.133345	0.570797	0	0	1.4147	2.85035	HSPA8;HSP90AA1;DSTN;RPSA;ENO1;EEF2;HSPD1;ARPC2;KIT;B3GNT2;EIF3H;COX1;NCOA7
Malignant Melanoma C0025202 human GSE3189 sample 117	15/350	0.13352	0.568645	0	0	1.37583	2.77024	HSPA8;HSP90AA1;HSP90AB1;IGSF3;FN1;ENO1;ACTN4;EEF2;COX5A;YWHAZ;ETV5;HSPD1;TRIM28;MXI1;SGK1
polycystic ovary syndrome DOID-11612 human GSE48301 sample 806	11/241	0.133651	0.566327	0	0	1.46527	2.94889	TLE4;EGR1;DENND2C;SPRED2;SMAD3;HSPB8;KIT;CCDC141;PPP1R9A;ETV5;TTN
Type 2 diabetes mellitus C0011860 mouse GSE2899 sample 203	14/323	0.134796	0.568312	0	0	1.39145	2.78845	HSPA8;AHNAK;CLTC;ANK3;SORBS1;EEF2;HSPE1;PNRC1;EEF1A1;MYH9;QK;TOP1;YWHAG;BRD4
Fracture of femur C0015802 rat GSE1371 sample 278	15/351	0.135735	0.569408	0	0	1.37191	2.73978	EGR1;SPARC;TSC22D1;AHNAK;CLTC;FN1;ENO1;EEF2;LITAF;YWHAZ;AKAP12;EEF1A1;PIGL;TNS3;SRSF11
salivary gland adenoid cystic carcinoma DOID-4866 human GSE36820 sample 511	15/351	0.135735	0.566575	0	0	1.37191	2.73978	SPARC;HSP90AB1;CTBP2;RPSA;ENO1;ACTN4;EEF2;EEF1A1;TRIM28;ARPC2;FAT1;COX1;ANP32B;CTNNAL1;YWHAG
ductal carcinoma in situ DOID-0060074 human GSE21422 sample 605	13/297	0.13821	0.574052	0	0	1.40517	2.7808	HSPA8;LYPLA1;HSP90AA1;SPARC;FN1;HSPE1;GJA1;LASP1;RAB31;ARPC2;TRPS1;COX1;SGK1
autism spectrum disorder DOID-0060041 human GSE25507 sample 1026	12/270	0.138906	0.5741	0	0	1.42679	2.81642	EEF1A1;EGR1;HSPA8;HSP90AA1;TRIM28;ANXA6;NOSIP;EIF3H;COX1;RPSA;EEF2;ATF4
Hypoxia C0242184 human GSE4483 sample 440	14/325	0.139468	0.573595	0	0	1.38289	2.72418	PFKFB3;ATP2B4;RPSA;SLC2A3;ENO1;RBPJ;EEF2;PNRC1;AKAP12;GJA1;MXI1;TSPAN5;COX1;MALAT1
multiple sclerosis DOID-2377 human GSE26484 sample 742	12/271	0.141511	0.579158	0	0	1.42152	2.77962	EGR1;GLT1D1;SPARC;RAB31;COX1;MALAT1;SLC2A3;IQGAP1;SGK1;EEF2;SORL1;PNRC1
colon adenoma DOID-0050912 human GSE4183 sample 550	14/326	0.141836	0.577673	0	0	1.37864	2.6926	HSPA8;CEMIP;HSP90AA1;HSP90AB1;RPSA;ENO1;EEF2;SORL1;RTN4;ABLIM1;FAT1;EIF3H;NCOA7;ANP32B
Congestive heart disease C0018802 mouse GSE2236 sample 258	12/272	0.144141	0.584224	0	0	1.4163	2.74331	ENAH;EEF1A1;RCAN1;SPARC;CAPZB;TNIP1;DNAJA2;FAT1;DSTN;SGK1;SPTAN1;RTN4
endometrial cancer DOID-1380 human GSE17025 sample 848	14/327	0.144227	0.581763	0	0	1.37443	2.6614	HSP90AA1;HSP90AB1;ENO1;IQGAP1;COX5A;YWHAZ;ABLIM1;ARPC2;ARHGEF3;CCDC6;EIF3H;COX1;YWHAG;MCM2
myelodysplastic syndrome DOID-0050908 human GSE19429 sample 748	14/327	0.144227	0.578979	0	0	1.37443	2.6614	ANKRD28;EGR1;HSP90AA1;DSTN;RPSA;EEF2;SORL1;SLTM;KIT;EIF3H;NCOA7;BIRC6;YWHAG;ATF4
autism spectrum disorder DOID-0060041 human GSE25507 sample 1023	14/327	0.144227	0.576222	0	0	1.37443	2.6614	CX3CR1;HSPA8;HSP90AA1;HSP90AB1;ARHGAP17;EEF1A1;LASP1;TRIM28;ARPC2;PCED1B;MYH9;EIF3H;RAF1;ATF4
Type 2 diabetes mellitus C0011860 mouse GSE2899 sample 299	15/355	0.144801	0.575772	0	0	1.35645	2.62121	HSPA8;HSP90AA1;DDC;TSC22D1;TIMM23;DSTN;H13;ELL2;UBL3;TRIM28;ARPC2;UBE2R2;ANXA6;MYH9;YWHAG
astrocytoma DOID-3069 human GSE15824 sample 861	13/301	0.148229	0.586624	0	0	1.3865	2.64682	CX3CR1;EGR1;NTRK2;SPARC;MAML2;RPSA;EEF1A1;GJA1;DPP6;RAB31;EIF3H;SGK1;JAM2
endometrial cancer DOID-1380 human GSE17025 sample 847	10/220	0.150426	0.592521	0	0	1.45921	2.76417	HSP90AA1;STK24;ZMIZ1;CCDC6;GLIS3;COX1;NCOA7;E2F3;RHPN2;IGF2BP2
autism spectrum disorder DOID-0060041 human GSE63524 sample 1035	12/275	0.152188	0.596661	0	0	1.40085	2.63729	TLE4;EPHA4;GJA1;FN1;IGF2BP1;PTPRK;SIPA1L2;TEX2;MID1;CTNNAL1;JAM2;FGFR2
papillary thyroid carcinoma DOID-3969 human GSE54958 sample 653	9/194	0.15296	0.596901	0	0	1.4893	2.79628	EPS8;NRP2;TESC;FN1;LAMC2;NOD1;IGF2BP2;ETV5;TTC39B
Huntington's disease DOID-12858 mouse GSE3248 sample 725	12/276	0.154921	0.601753	0	0	1.39577	2.60289	EEF1A1;SNAP47;CREBBP;HSP90AA1;HSP90AB1;ERDR1;TIMM23;NCAM1;EEF2;YWHAZ;ATF4;PAFAH1B1
Spinal Cord Injury C0037929 rat GSE2599 sample 426	11/249	0.156036	0.603292	0	0	1.41819	2.63453	EEF1A1;GJA1;SPARC;AHNAK;PRX;FN1;RPSA;SGK1;EEF2;TNS3;ARHGAP23
systemic lupus erythematosus DOID-9074 human GSE10325 sample 693	15/360	0.156589	0.602652	0	0	1.33761	2.48011	SRRM2;CX3CR1;DARS;ENO1;DDX60;COX5A;YWHAZ;SORL1;GATAD2A;SEPT9;CCND3;ARPC2;MXI1;ARHGEF3;PIEZO1
juvenile dermatomyositis UMLS CUI-C0263666 human GSE11971 sample 772	20/503	0.159033	0.609263	0	0	1.27645	2.34694	DARS;HSPA8;HSP90AA1;HSP90AB1;SPARC;TSC22D1;TPM3;HSPB8;FN1;DDX60;RTN4;HSPD1;ENAH;EEF1A1;DEPTOR;ARPC2;PALLD;ANXA6;SGK1;ATF4
Hypoxia C0242184 human GSE4630 sample 250	11/251	0.161914	0.617481	0	0	1.40689	2.56152	AHNAK;STK24;TNIP1;ST5;MXI1;ANXA6;SLC2A3;ENO1;SGK1;SPTAN1;RTN4
Nemaline Myopathy C0206157 mouse GSE3384 sample 180	17/419	0.162539	0.617059	0	0	1.3025	2.36643	HSPA8;HSP90AB1;SPARC;AHNAK;TPM3;HSPB8;TIMM23;EEF2;EPN1;NCOR2;EEF1A1;RCAN1;UBL3;ANXA6;PAIP2;YWHAG;ATF4
breast cancer DOID-1612 human GSE26910 sample 602	10/224	0.162821	0.615347	0	0	1.43316	2.60133	FHOD3;CEMIP;RAB31;AIM2;TENM4;FN1;GLIS3;SMYD3;SORL1;KANK4
Lung transplant rejection C0729958 human GSE2018 sample 66	14/335	0.164133	0.617522	0	0	1.34161	2.42439	CX3CR1;IDH1;RAB27A;RPSA;EEF2;YWHAZ;SORL1;EEF1A1;SEPT9;MXI1;ANXA6;SGK1;TNS3;ATF4
asthma DOID-2841 human GSE27011 sample 565	16/392	0.165725	0.620729	0	0	1.31032	2.35519	CX3CR1;MACF1;PHC1;YES1;BNC2;AUTS2;PDE4D;ELOVL6;DDX60;TTC39B;GK5;FMNL2;ZMAT4;SNAPC3;NCAM1;TNFRSF21
Dehydration C0011175 rat GSE3131 sample 60	10/225	0.165996	0.618981	0	0	1.42679	2.56221	NSF;EEF1A1;DPP6;XPNPEP1;GNG7;TIMM23;COX1;RPSA;ENO1;EEF2
Senescence C0001792 human GSE1786 sample 114	15/364	0.166376	0.617654	0	0	1.32291	2.37265	HSP90AA1;SPARC;PFKFB3;TSC22D1;AHNAK;HSPB8;FOXJ3;DSTN;EEF2;RTN4;EEF1A1;DEPTOR;TRIM28;ANP32B;TACC2
Acne C0702166 human GSE10432 sample 297	13/308	0.166663	0.615992	0	0	1.35499	2.42784	TLE4;EGR1;SMAD3;WWC1;ACTN4;LITAF;RELB;CAPZB;EPB41L1;RPS6KA2;MDM4;TRIM16;TBL1X
atopic dermatitis DOID-3310 human GSE26952 sample 981	12/281	0.168963	0.621754	0	0	1.37094	2.43763	ADAM19;RCAN1;PPP4R1;RAB31;GSTA4;PALLD;FAT1;NCOA7;ENO1;TRIM16;TNFRSF21;PTGES
Adenocarcinoma of lung C0152013 human GSE1987 sample 431	12/281	0.168963	0.619039	0	0	1.37094	2.43763	SRRM2;SEPT9;HSP90AA1;DDC;SART3;STK24;FAT1;ENO1;PTPRK;HSPE1;SORL1;HSPD1
Familial combined hyperlipidaemia C0020474 human GSE1010 sample 137	10/226	0.169201	0.617215	0	0	1.42047	2.52371	HSPA8;HSP90AB1;TESC;EIF3H;ARHGAP17;ENO1;EEF2;LITAF;COX5A;HSPD1
Dehydration C0011175 rat GSE3110 sample 443	14/337	0.169321	0.61498	0	0	1.33364	2.3685	HSPA8;SPARC;CUL3;CLTC;ENO1;HSPE1;COX5A;YWHAZ;TSPAN5;MAPT;SGK1;BCAT1;YWHAG;ATF4
Epilepsy C0014544 human GSE7486 sample 417	9/199	0.169791	0.614028	0	0	1.45188	2.57446	EEF1A1;HSPA8;HSP90AB1;ANXA6;COX1;MALAT1;ENO1;SGK1;EEF2
Arthropathy C0022408 human GSE10575 sample 271	9/199	0.169791	0.611392	0	0	1.45188	2.57446	EEF1A1;GJA1;PALLD;FN1;DSTN;COX1;RPSA;EEF2;RAI14
anemia DOID-2355 human GSE4619 sample 791	13/310	0.172134	0.617182	0	0	1.34624	2.36869	ANKRD28;HSP90AA1;UHRF1;RPSA;HSPD1;SLTM;ARPC2;ARHGEF3;B3GNT2;EIF3H;COX1;NCOA7;YWHAG
[truncated: 603 more rows]
