# Supplementary material
Source: MDPI journal article supplement (https://www.mdpi.com/2076-3417/11/1/213)
Supplement: s1 [file s1 › Enrichr_GSE140561_human.xlsx]

## Sheet: ENCODE and ChEA Consensus TFs from ChIP-X
Term	Overlap	P-value	Adjusted P-value	Old P-value	Old Adjusted P-value	Odds Ratio	Combined Score	Genes
UBTF ENCODE	104/1631	5.64164e-11	5.8673e-09	0	0	1.92352	45.3916	PANK2;IRS2;JADE2;MKI67;ACTG1;ZMIZ1;EME2;FAM3C;BAHCC1;MAP3K5;SKP1;MAP2K3;SUPT16H;PPTC7;FNBP1;ZNF282;DYRK1A;HUS1;ADAM10;PRKCA;TTC7A;CLIP2;PHIP;EZR;ZNF276;OSER1;NEDD4L;RASAL2;RAI1;FUT8;ATXN1;EP400;ZC3H18;MAP4;RREB1;FAM120AOS;SMAD3;SMURF2;RDX;CBX1;NUP153;ARHGAP26;NR2F6;STAG1;DMXL1;ANP32B;CDK13;CPEB3;MCU;NFE2L2;SETD5;DIDO1;SETD2;RNF11;B4GALT1;SLC2A1;FAM208A;PTPRJ;SHB;ELAVL1;NIPBL;LASP1;FAM102A;MED13;D…
GATA1 CHEA	64/807	9.41444e-11	4.89551e-09	0	0	2.39234	55.23	BCAR3;LGALS3BP;ERRFI1;ZMYND8;SLC2A1;PRKAG2;PTPRJ;ELAVL1;ACTB;PTPRF;GOLGA4;LIPC;ZNF608;CAPZB;ZMIZ1;RPS6KA2;MYO18A;ERC1;WHSC1;SPTAN1;BAHCC1;SMIM12;RALGPS1;CDK5RAP2;MAP3K5;PHACTR4;TGM2;NDEL1;ABCC4;PLLP;VPS13D;GAB1;COBL;PRKCA;THOC2;HSPG2;EEF1A1;PARD3;TNIK;EPHA2;MACF1;CTR9;RRBP1;ASAP1;ATXN1;SEC14L1;RXRA;SH3TC2;ABL1;ANO10;RREB1;BPTF;NEK8;SMAD3;NEK6;PCDH7;PLEKHA6;MICAL2;NUP153;TNIP1;DLC1;GNAQ;ANP32E;TMC…
SMAD4 CHEA	51/584	3.13748e-10	1.08766e-08	0	0	2.63435	57.646	BCAR3;NRP1;NRP2;CHD9;KIAA1671;PTPRJ;SHB;SYNE1;ALCAM;ZNF608;RPS6KA2;ME3;TNS4;TEAD1;MAGI1;LIMCH1;MAGI3;MYOF;SHROOM3;INPP4A;PARD3;HECW2;ROR1;TNIK;CREB5;LTBP2;RASAL2;PLCXD2;UACA;CTIF;FUT8;FGD6;ATXN1;NRIP1;NHS;FLNB;SRGAP3;B4GALNT3;ZC3H13;RREB1;PRELID2;ZNF462;NEBL;MICAL2;PLEKHA6;HMGA2;ARHGAP26;BICC1;PTPRD;DLC1;CALM2
AR CHEA	68/1095	4.54728e-07	1.18229e-05	0	0	1.87332	27.3571	APP;ERRFI1;NRP1;EHF;THRB;C2ORF88;PRKAG2;IRS2;SLC7A11;PTPRF;AKAP12;CAPZB;AP3S1;MACROD2;TNS3;MAP3K5;MAGI1;ABCC4;PPP1R12A;PPTC7;GAB1;COBL;SHROOM3;PRKCA;VCAN;AIM1;PLCB4;TBC1D5;PARD3;KCNQ1;TNIK;KIF20A;ST6GALNAC5;PDE9A;VCL;RBMS3;CDCA2;NEDD4L;ASAP1;RASAL2;MLLT3;FHIT;KALRN;EGFR;THSD4;GNA13;FUT8;ABLIM3;COBLL1;MAP4;RREB1;MYH10;OSBPL9;CA12;USP25;KCNIP1;NEBL;PHF12;CRIM1;MICAL2;HMGA2;KTN1;ABTB2;MYO1E;BRE;NFIB…
TP63 CHEA	78/1399	4.12098e-06	8.57165e-05	0	0	1.68187	20.8543	ERRFI1;NRP1;EHF;MTCL1;CHD9;FAF2;TNC;HDLBP;NUCKS1;SLC7A11;JADE2;SHB;SIPA1L3;TRIOBP;AKAP12;GOLGA4;ALCAM;DUSP10;ERC1;WHSC1;TEAD1;RALGPS1;TGM2;MAGI1;TANGO6;SCARA3;ANXA1;ITGA3;RHBDF2;CTDSPL;SHROOM2;PLAUR;SLC39A10;LMO7;TSC1;INIP;EDAR;CLIP2;TBC1D2;AIM1;DOK7;TOP1;CLDN16;MET;GLIS3;LRP5;ASAP2;GRAMD3;NT5C2;PLCXD2;EGFR;FAM129B;SCEL;RAI1;ABLIM3;HAS3;FAM63B;SH3BP4;SRGAP3;PDE6A;RREB1;CA12;ZNF462;BDNF;NEK6;RDX;T…
TCF3 ENCODE	53/840	5.73856e-06	9.94683e-05	0	0	1.90333	22.9699	SETD5;ERRFI1;SETD2;RNF11;PANK2;B4GALT1;ACTB;ACTG1;ALCAM;SLK;PPP4R2;ZMIZ1;RPL35;CHAC1;FAM3C;EPHB2;SPTAN1;EIF5B;SMARCC1;PPP1R12A;NCBP2;SLC39A10;PRPF40A;TTC7A;NEAT1;CD2AP;LATS1;EEF1A1;CDC34;ERF;MALAT1;GPRC5C;ZNF276;ANKRD17;RRBP1;METTL21A;KLC1;GIGYF2;GNA13;FGD6;TSPAN4;HIVEP2;RCE1;SMAD3;IQSEC1;SETD1A;EEF2;NR2F6;EXT1;STAG1;DMXL1;P4HB;CDK13
TCF3 CHEA	60/1006	7.91958e-06	0.000117662	0	0	1.79916	21.1332	BCAR3;DIDO1;B4GALT1;ZMYND8;C2ORF88;NUCKS1;PPP1R9A;FAM102A;LURAP1L;CAPZB;SPTLC2;ARIH2;SIRPA;AP3S1;CIC;BAHCC1;MAGI1;ABCC4;FNBP1;SHROOM3;TTC7A;ACTN4;CD2AP;ZC3H11A;SMS;ROR1;MAD1L1;AHDC1;RAI14;UHRF1;GRAMD3;UACA;FHIT;GIGYF2;SKA2;MLLT6;CTIF;FUT8;ATXN1;PDGFC;NRIP1;HAS3;ANKRD10;SRGAP3;HIVEP2;SPTBN1;MGEA5;PHF12;RDX;CBX1;DAB2IP;ARHGAP24;EXT1;TNIP1;NFIB;DMXL1;DLC1;CDK12;OGT;MEGF9
SALL4 CHEA	28/355	2.24262e-05	0.000291541	0	0	2.37928	25.4709	BCAR3;ITGB1;SETD5;RABGAP1;UHRF1;ZMYND8;PPP1R9A;LITAF;PRSS23;GNA13;SEC14L1;SALL1;LURAP1L;SH3BP4;TNRC18;SEC62;SPTBN1;COBL;DEK;OXR1;EXT1;ANLN;STAG1;ASPH;NFIB;PARD3;ASXL2;OGT
YY1 ENCODE	129/2753	2.24659e-05	0.000259606	0	0	1.41351	15.1296	PANK2;HDLBP;NUCKS1;CCAR1;RPS14;GOLGA4;PPP4R2;EME2;LONP1;DLEU1;SEC62;CDK5RAP2;SAP30BP;TANGO6;PPTC7;ZNF282;DYRK1A;HUS1;TSC1;THOC2;EEF1A1;MORF4L1;ZC3H11A;NCL;MTHFD2L;PHIP;MALAT1;SNRPF;KIF20A;EZR;UBA52;MMADHC;FTO;ATP6V1A;FTX;KLC1;FHIT;GIGYF2;SKA2;CTIF;TMEM245;ZMAT2;GRPEL2;ABL1;ABL2;DHX38;ZC3H18;FAM192A;RCE1;ZBED6;NDUFV2;KIAA0319L;RREB1;BPTF;OSBPL9;HSPA9;HSPA4;PHF12;RDX;EEF2;STAG1;GON4L;NASP;NMT1;NF1;…
ZNF384 ENCODE	45/730	5.13858e-05	0.000534412	0	0	1.85954	18.3651	ATP6V1A;PLEKHB2;PNKP;ARL3;NOL8;ARHGAP18;FAM208A;JADE2;TOB2;PARL;ACTB;NIPBL;TCOF1;SUMO1;SPTLC2;SIN3A;TMEM248;UBTF;FLNA;CLSPN;BPTF;ATF7IP;EIF5B;SUPT16H;TANGO6;CCDC115;HSPA4;PHF12;EYA3;DYRK1A;EMP1;USF2;INIP;NCOR2;FAM111A;MORF4L1;BTD;NASP;ASXL2;PHIP;RBCK1;CPEB3;SAE1;CALM2;LUC7L2
ESR1 CHEA	16/154	5.44837e-05	0.000515119	0	0	3.13412	30.7696	MAGI1;CA12;SVIL;MYOF;DCDC2;NT5C2;LITAF;ACTB;THSD4;NCOR2;NRIP1;SH3BP4;TOP1;TNS3;GPRC5C;LIMS1
PPARD CHEA	23/285	8.39906e-05	0.000727918	0	0	2.43444	22.8468	ABCC3;NRP1;ANXA1;DDX27;IRS1;CHD9;PRKCA;MYO9B;ITPR3;ASAP1;PLOD1;GRAMD3;EXT1;HADHA;CLIP2;LASP1;RGS3;ZMAT2;NF1;FLNB;MALAT1;DCP1A;TNS3
ZBTB7A ENCODE	104/2184	8.83198e-05	0.000706558	0	0	1.43647	13.4088	APP;PLEKHB2;IRS1;TONSL;MSANTD3;NUCKS1;JADE2;FNBP1L;CCDC102A;CCAR2;ACTB;ACTG1;ZMIZ1;EME2;FAM3C;SLC16A5;KPNA1;TGM2;TANGO6;FNBP1;ZNF282;HUS1;TSC1;TTC7A;NEAT1;SDHA;CD2AP;INPP4A;EEF1A1;MORF4L1;CDC34;PARD3;ERF;PHIP;EZR;OBSL1;MAD1L1;VCL;EPHA2;RAI14;ZNF276;C11ORF95;CDCA2;NEDD4L;PPL;KIAA1524;RAI1;TMEM245;ATXN1;TSPAN4;ANKRD10;TNRC18;RREB1;RAB11FIP3;MYH10;RDX;EXT1;ANLN;STAG1;ANP32E;ANP32B;NFE2L2;MUS81;SETD2…
GATA2 CHEA	46/772	9.49442e-05	0.0007053	0	0	1.79745	16.6484	BCAR3;ERRFI1;CHD9;ZMYND8;ITSN1;CTR9;HMGB2;FOXK2;MLLT1;FNBP1L;PTPRF;KIAA0513;FUT8;LASP1;DUSP10;SEC14L1;RXRA;RGS3;ZMIZ1;RPS6KA2;MYO18A;RREB1;SPTAN1;BAHCC1;MAP3K5;TGM2;MAP2K3;NEK8;MAGI1;PHF12;SUSD1;MICAL2;ACTN4;NEAT1;HSPG2;EEF1A1;AIM1;PLCB4;OBSCN;NFIB;DLC1;GNAQ;TMCC2;CALM2;MGLL;EPHA2
TP53 CHEA	24/319	0.000174852	0.00121231	0	0	2.26954	19.635	ANKRD17;SEMA6A;THRB;CHD9;PCDH7;PRKAG2;NUCKS1;SYNE1;LASP1;ZNF608;MTHFD1L;GNG7;PDGFC;POLE3;ABL1;NHS;ANKRD10;TNRC18;MAP4;EPHB2;OBSL1;MAD1L1;EPHA2;KPNA1
CTCF ENCODE	87/1790	0.000182335	0.00118518	0	0	1.46616	12.6232	MUS81;APP;SETD2;THRB;DDX46;IRS1;CHD9;RRP1;FAF2;TONSL;JADE2;ACTB;PTPRF;RPS14;NIPBL;ALCAM;MED13;PPP4R2;EME2;SIX5;FAM3C;SMIM12;MAP3K5;TGM2;EIF5B;TANGO6;SEMA6A;ZNF282;ITGA3;ARHGEF17;MYOF;ARHGEF16;H2AFV;PRPF40A;NCOR2;EDAR;MORF4L1;CDC34;ALDH1A2;ROR1;MET;PLEC;ANKRD17;ATP6V1A;TBC1D9B;NXN;DDX23;NEDD4L;MLLT1;RRBP1;LTBP2;ASAP2;METTL21A;PARL;RAI1;FUT8;ATXN1;FGD6;SEC14L1;ABLIM3;MTHFD1L;U2AF2;COBLL1;EP400;FLNB…
KLF4 CHEA	54/987	0.000216201	0.00132264	0	0	1.65041	13.9283	MUS81;SETD5;DIDO1;NRP2;CHD9;C2ORF88;HDLBP;PTPRJ;JADE2;ACTB;ACTG1;AKAP12;LASP1;SALL1;ZMIZ1;STK32A;NDEL1;EIF5B;PPP1R12A;RFC1;COBL;HNF1B;RANGAP1;EEF1A1;THRAP3;EZR;GAPDH;MAD1L1;LUC7L2;PLEC;UHRF1;ITPR3;TOB2;PPL;SKA2;MLLT6;ARHGAP22;SEC14L1;GRPEL2;HAS3;ABL1;ANKRD10;HSPA9;PRELID2;BDNF;RDX;CBX1;BAIAP2;USF2;ANLN;IRGQ;SPSB1;ANP32B;OGT
NFE2L2 CHEA	55/1022	0.00028483	0.00164569	0	0	1.62341	13.2529	BCAR3;EHF;IRS1;ITGB2;TNC;ZBTB20;MSANTD3;IRS2;PIK3CB;SLC7A11;SYNE1;FAM102A;PPP4R2;ZMIZ1;IKBKG;CDK5RAP2;ABCC4;ANXA1;PPP1R12A;FNBP1;NCBP2;MAGI3;PLAUR;SLC39A10;LMO7;TIAM2;VCAN;AIM1;CDC34;ZC3H11A;MMADHC;RAI14;OSER1;MACF1;GCNT1;GLIS3;ARHGAP18;TFPI;SCEL;RXRA;NSD1;PDGFC;SMAD3;PCDH7;DAB2IP;CRIM1;OXR1;KTN1;EXT1;LRCH1;FMNL2;BRE;CD9;FAT4;MEGF9
FOXM1 ENCODE	11/95	0.000305234	0.00167075	0	0	3.4929	28.273	ATF7IP;CENPF;CDCA2;INCENP;HMGB2;DYRK1A;NUCKS1;KIF20A;MKI67;CALM2;SKA2
CREB1 CHEA	72/1444	0.000330867	0.00172051	0	0	1.50412	12.0537	KDM5A;RRP1;NUCKS1;BRCA2;AATF;ACTB;KIF15;RPS14;ZMIZ1;SIN3A;UBTF;LONP1;CHAC1;CIC;TEAD1;BAHCC1;SKP1;NDEL1;MAP2K3;SAP30BP;NCBP2;ARHGEF17;CEP131;DYRK1A;PRPF40A;RANGAP1;EPN1;NCOR2;EEF1A1;MORF4L1;CDC34;INCENP;THRAP3;CANX;TOP1;GAPDH;PLEC;OSER1;ANKRD17;RABGAP1;DDX27;PSEN1;TOB2;ABLIM2;TMEM248;SPOCK2;UBN2;UBN1;NRIP1;ZC3H18;FAM192A;RCE1;RAB11FIP3;MYH10;USP25;UBE2B;PHF12;SGTA;CNOT10;NUP153;EEF2;OXR1;C9ORF85;E…
E2F6 ENCODE	139/3245	0.000653631	0.00323703	0	0	1.29216	9.47537	APP;ERRFI1;RRP1;TONSL;IRS2;HSF2BP;NUCKS1;CAPN15;CCAR1;EME2;LONP1;FAM3C;CDK5RAP2;SUPT16H;SLC38A1;CEP131;THOC2;HSPG2;INIP;BTD;ZC3H11A;NCL;SPATA13;SMS;EZR;RAI14;ZNF276;ATP6V1A;ARL3;MGST3;ITPR3;RASAL2;SKA2;ARHGAP22;TMEM245;SEC14L1;KCNQ1OT1;MAP4;CLSPN;RAB11FIP3;BPTF;HSPA9;PRELID2;UBE2B;SMURF2;CBX1;TBCD;MICAL2;CNOT10;NUP153;FAM111A;ANLN;STAG1;NASP;MIR1204;OGDH;ANP32B;CDK13;SAE1;CALM2;NFE2L2;ITGB1;SETD5…
E2F4 ENCODE	40/710	0.000808954	0.00382415	0	0	1.69949	12.1	TOP2A;SETD5;DIDO1;CDCA2;C2CD3;UHRF1;HMGB2;NOL8;NUCKS1;BRCA2;MKI67;SKA2;KIF15;KIAA1524;SUMO1;ERI1;DHX15;CLSPN;EXOSC2;CDK5RAP2;SUPT16H;STIL;RFC1;H2AFV;PRPF40A;MYO9B;NUP153;DEK;TTC7A;THOC2;BAZ1B;FAM111A;CENPF;STAG1;NASP;INCENP;ANP32E;KIF20A;SAE1;LUC7L2
PBX3 ENCODE	63/1269	0.000875926	0.00396071	0	0	1.4976	10.5434	TOP2A;KDM5A;SETD5;PANK2;MAST4;ITSN1;ZBTB20;IRS2;NUCKS1;CCDC102A;ELAVL1;ACTB;DUSP10;SIX5;RALGPS1;MAP2K3;CEP131;DYRK1A;H2AFV;PRPF40A;TSC1;BAZ1B;INIP;EEF1A1;BTD;ASPH;INCENP;CANX;PHIP;MALAT1;GAPDH;ZNF276;CDCA2;USP16;FOXK2;MLLT1;RRBP1;TOB2;FHIT;SKA2;KIAA0513;ARVCF;FUT8;FAM120A;RHPN1;TSPAN4;TNRC18;MYH10;FAM120AOS;STIL;UBE2B;BAIAP2;C9ORF85;NMT1;OGDH;ANP32E;TMCC2;P4HB;OGT;CALM2;MCU;NFE2L2;MEGF9
TCF7L2 ENCODE	34/583	0.0010968	0.0047528	0	0	1.75925	11.9899	ITGB1;ATP6V1A;RBM25;MGST3;HSF2BP;RRBP1;SLC7A11;ACTB;SKA2;MLLT6;CTIF;DUSP10;ZMIZ1;UBN1;FAM63B;TNRC18;FAM3C;NKTR;MIR3175;SMARCC1;STIL;SMAD3;SMURF2;HSPA4;TBCD;SARS;MYO9B;FMNL2;INCENP;TMEM51-AS1;NMT1;OGDH;CALM2;NFE2L2
SMC3 ENCODE	59/1181	0.00109924	0.00457284	0	0	1.50702	10.2675	BCAR3;APP;THRB;CHD9;FAF2;TONSL;PTPRJ;JADE2;PTPRF;MED13;RGS3;ZMIZ1;EME2;SIX5;SMIM12;MAP3K5;TGM2;SEMA6A;ARHGEF17;MYOF;ARHGEF16;EDAR;RBCK1;EZR;MET;PLEC;ANKRD17;NXN;DDX23;NEDD4L;RRBP1;LTBP2;ASAP2;METTL21A;PARL;RAI1;ATXN1;FGD6;ABLIM3;U2AF2;EP400;FLNB;MAP4;NDUFV2;NEK8;SVIL;KIRREL;EEF2;ARHGAP26;SSH2;ABTB2;IRGQ;STAG1;LRCH1;NCEH1;TMCC2;CDK13;CPEB3;NFE2L2
NFYB ENCODE	154/3715	0.00132024	0.00528096	0	0	1.25048	8.29064	ERRFI1;PANK2;ZMYND8;ITSN1;HDLBP;ZBTB20;IRS2;NUCKS1;MKI67;CCDC102A;ACTB;CCAR1;RPL35;CHAC1;FAM3C;CDK5RAP2;MAP2K3;SAP30BP;MBNL2;MAGI3;CEP131;DYRK1A;ADAM10;INIP;MORF4L1;BTD;NCL;SNRPF;KIF20A;UBA52;VCL;OSER1;CDCA2;ARL3;CTR9;ARHGAP18;LYPD6;PLCXD2;SKA2;TMEM245;FUT8;ZMAT2;RHPN1;ABL1;DHX38;TNRC18;FAM192A;MAP4;CLSPN;KIAA0319L;SRGAP1;MYH10;FAM120AOS;OSBPL9;STIL;SMAD3;PHF12;SETD1A;CBX1;MICAL2;ARHGAP26;C9ORF85…
RCOR1 ENCODE	38/702	0.00219289	0.00844668	0	0	1.63291	9.99757	PANK2;MLLT1;UQCR11;RRBP1;ARHGAP22;ZMIZ1;SIX5;LONP1;ANKRD10;ZNF205;RREB1;SPTAN1;RALGPS1;SPEN;EIF5B;ABCC4;ZFHX2;UBE2B;ZNF282;ARRDC1;NEK6;MAGI3;PRKCA;DEK;TTC7A;SSH2;CD2AP;ABTB2;NCOR2;INPP4A;STAG1;TBC1D5;ERF;NF1;ANP32B;EZR;CALM2;MEGF9
CHD1 ENCODE	36/655	0.00220393	0.00818604	0	0	1.65797	10.1427	SETD5;SETD2;HMGB2;NOL8;FAM208A;PTPRJ;TBRG4;NIPBL;MED13;ZMIZ1;FAM120A;UBTF;TSPAN4;AP3S1;HIVEP2;NKTR;BPTF;SPEN;MGEA5;SUPT16H;UBE2B;DYRK1A;SARS;ADAM10;DDX54;PRPF40A;MIR21;EEF2;ANLN;STAG1;SLTM;THRAP3;ANP32E;OGT;LUC7L2;NFE2L2
MAX ENCODE	92/2073	0.00222301	0.00797216	0	0	1.33877	8.17839	KDM5A;DIDO1;ERRFI1;DDX46;RRP1;FAM208B;FAM208A;HSF2BP;JADE2;BRCA2;AATF;CCAR1;KIF15;LONP1;DHX15;RPL35;AP3S1;FAM3C;SMIM12;KPNA1;EIF5B;ABCC4;SUPT16H;SLC38A1;SMARCC1;CLUH;RFC1;NCBP1;CCDC115;NCBP2;DYRK1A;HUS1;DDX54;THOC2;RANGAP1;SUMF1;HADHA;ASPH;TBC1D5;ZC3H11A;NCL;MTHFD2L;CANX;TOP1;KIF20A;UBA52;THOP1;LUC7L2;OSER1;ATP6V1A;ARL3;FOXK2;NOL8;MLLT1;RASAL2;TOB2;METTL21A;PARL;TBRG4;SEC14L1;TCOF1;MTHFD1L;U2AF2;…
STAT3 CHEA	14/177	0.00236937	0.00821383	0	0	2.386	14.4237	ITGB1;NRP2;KIRREL;CHD9;ZMYND8;GLIS3;EMP1;COBL;NUP153;MLLT3;MLLT6;SPSB1;LRCH1;DLC1
POU5F1 CHEA	18/261	0.00284116	0.00953162	0	0	2.08041	12.1986	ATF7IP;DIDO1;C2ORF88;CBX1;SHROOM3;NUCKS1;CNOT10;MLLT6;AKAP12;STAG1;FAM102A;SALL1;ZMIZ1;PDGFC;MYO18A;ROR1;OGT;MAD1L1
NANOG CHEA	33/595	0.00287305	0.0093374	0	0	1.67307	9.79143	DIDO1;B4GALT1;C2ORF88;NUCKS1;VLDLR;GRAMD3;SKA2;MLLT6;AKAP12;GNA13;RAI1;SALL1;ZNF608;LURAP1L;PDGFC;HAS3;ANKRD10;SIRPA;ZNF205;MGEA5;CBX1;SARS;COBL;SHROOM3;CNOT10;ACTN4;BAIAP2;EXT1;NFIB;SMS;ROR1;OGT;RAI14
MYC ENCODE	70/1515	0.00293344	0.00924478	0	0	1.3938	8.12808	DIDO1;RBM25;CHD9;RRP1;SLC2A1;FAM208B;ADIRF;HSF2BP;JADE2;BRCA2;AATF;RPS14;EME2;LONP1;DHX15;AP3S1;FAM3C;SMIM12;EIF5B;ABCC4;SLC38A1;SMARCC1;CLUH;NCBP1;CCDC115;NCBP2;SLC39A10;DDX54;PRPF40A;BAZ1B;RANGAP1;EEF1A1;SLTM;THRAP3;NCL;CANX;SNRPF;TOP1;UBA52;THOP1;OSER1;FOXK2;NOL8;MLLT1;PARL;TBRG4;SEC14L1;TCOF1;MTHFD1L;U2AF2;TMEM248;ZNHIT6;GRPEL2;MAP4;EXOSC2;MBD3;HSPA9;SGTA;NUP153;EEF2;RSPH3;MIR1204;POLE3;NMT1;…
TAF1 ENCODE	137/3346	0.00408966	0.0125096	0	0	1.23513	6.79232	HDLBP;HSF2BP;NUCKS1;ACTB;CCAR1;ACTG1;RPS14;GOLGA4;EME2;RPL35;FAM3C;SEC62;SKP1;SAP30BP;SUPT16H;SLC38A1;SMARCC1;TANGO6;FNBP1;ZNF282;DYRK1A;HUS1;TSC1;ACTN4;NEAT1;CD2AP;EEF1A1;MORF4L1;NCL;PHIP;MALAT1;KIF20A;UBA52;MMADHC;VCL;OSER1;ANKRD17;ARL3;CTR9;KIAA1524;ZMAT2;KCNQ1OT1;GRPEL2;ABL1;TSPAN4;MAP4;RCE1;NDUFV2;BPTF;HSPA9;MGEA5;UBE2B;HSPA4;EEF2;C9ORF85;EXT1;STAG1;NASP;NMT1;NF1;ANP32E;CDK12;ANP32B;CDK13;DC…
ZMIZ1 ENCODE	45/914	0.005411	0.0160784	0	0	1.48519	7.7517	SETD5;SLC2A1;HMGB2;IRS2;HSF2BP;UQCR11;PLOD1;KLC1;ACTB;ACTG1;LASP1;FAM120A;ARIH2;EP400;FLNA;ANKRD10;CHAC1;RAB11FIP3;SPTAN1;MBD3;PPP1R12A;PPTC7;SMURF2;FNBP1;NCBP2;ADAM10;SARS;MIR21;TTC7A;BAIAP2;SSH2;LATS1;EXT1;EEF1A1;ITCH;SLTM;TBC1D5;NCL;PHIP;TRIB3;P4HB;CDK13;EZR;CALM2;PLEC
ATF2 ENCODE	118/2852	0.00572546	0.0165402	0	0	1.2481	6.44372	ZMYND8;RRP1;HDLBP;NUCKS1;CCDC102A;CCAR2;CCAR1;RPS14;EME2;LONP1;RPL35;SEC62;SUPT16H;SLC38A1;SEMA6A;HUS1;TSC1;NEAT1;CD2AP;EEF1A1;MORF4L1;ZC3H11A;NCL;MAD1L1;MMADHC;OSER1;ANKRD17;PPP1R37;ATP6V1A;CTR9;KLC1;SKA2;KIAA1524;SEC14L1;GRPEL2;TSPAN4;HIVEP2;MAP4;RCE1;HSPA9;MGEA5;STIL;UBE2B;HSPA4;PHF12;SETD1A;NUP153;EEF2;ARHGAP26;C9ORF85;EXT1;STAG1;GON4L;NASP;OGDH;NF1;ANP32E;CDK12;CPEB3;DCP1A;OGT;CALM2;NFE2L2;M…
STAT3 ENCODE	37/725	0.00643859	0.0180977	0	0	1.5395	7.76747	ANKRD17;ATP6V1A;RBM25;B4GALT1;PLEKHB2;PNKP;MVP;DDX23;NOL8;SLC7A11;TOB2;BICD1;TMEM245;LASP1;DUSP10;HIVEP2;FAM3C;MIR3175;NEK8;USP25;RDX;SARS;MIR21;NEAT1;RANGAP1;MIR423;MKLN1;HADHA;ASPH;THRAP3;TBC1D5;DMXL1;ANP32E;KIF20A;LUC7L2;NFE2L2;RBMS3
CEBPD ENCODE	37/734	0.00777751	0.0212858	0	0	1.52063	7.38494	ZNF276;B4GALT1;HDLBP;HMGB2;RRBP1;SLC7A11;TOB2;ACTB;ACTG1;ABLIM2;MTHFD1L;SIN3A;ERI1;MAP4;MYH10;NDEL1;SPEN;SLC38A1;RDX;MIR21;EEF2;LATS1;EEF1A1;ANLN;SLTM;CANX;OGDH;MALAT1;TRIB3;ANP32B;DCP1A;EZR;OGT;OBSL1;CALM2;LIMS1;NFE2L2
BRCA1 ENCODE	130/3218	0.0081566	0.0217509	0	0	1.21864	5.86033	ERRFI1;PANK2;RRP1;ITSN1;HDLBP;ZBTB20;HSF2BP;NUCKS1;JADE2;CCAR2;ACTB;RPS14;ALCAM;LONP1;RPL35;SEC62;SKP1;SUPT16H;SLC38A1;SMARCC1;MAGI3;TSC1;NEAT1;CD2AP;EEF1A1;MORF4L1;BTD;NCL;MTHFD2L;PHIP;MALAT1;MAD1L1;ZNF276;OSER1;FTO;ANKRD17;ATP6V1A;CDCA2;ARL3;CTR9;PSEN1;KIAA1524;TMEM245;ATXN1;TSPAN4;EP400;ANKRD10;HIVEP2;RCE1;NDUFV2;KIAA0319L;SRGAP1;MYH10;BPTF;NEK8;HSPA9;MGEA5;SMAD3;ZFHX2;SMURF2;HSPA4;PHF12;NUP15…
CEBPB ENCODE	11/144	0.00857301	0.0222898	0	0	2.30434	10.9667	HSPA9;ABLIM2;MTHFD1L;ERI1;SIN3A;CHAC1;SLC7A11;NEAT1;OGT;ACTB;NFE2L2
SOX2 CHEA	38/775	0.0107473	0.0272615	0	0	1.4791	6.70492	TOP2A;DIDO1;ERRFI1;NRP2;MTCL1;CHD9;C2ORF88;NEDD4L;TFPI;SKA2;MLLT6;CDH6;GNA13;SALL1;RXRA;PDGFC;ANKRD10;PLS3;SIRPA;ZNF205;SRGAP3;TNS3;ATF7IP;USP25;PLLP;CRIM1;COBL;SHROOM3;CNOT10;EXT1;MYO1E;STAG1;NFIB;SCNN1A;ROR1;TRIB3;OGT;LGR4
USF1 ENCODE	63/1423	0.0114822	0.028432	0	0	1.33553	5.96574	APP;HDLBP;IRS2;BRCA2;AATF;CCAR1;ACTG1;MED13;LONP1;PLS3;SUPT16H;SLC38A1;CLUH;CCDC115;DYRK1A;ADAM10;SLC39A10;DDX54;TSC1;NEAT1;SUMF1;ASPH;THRAP3;TBC1D5;ZC3H11A;NCL;CANX;TOP1;UBA52;GAPDH;LUC7L2;RAI14;OSER1;ATP6V1A;ARL3;NOL8;UQCR11;GIGYF2;GNA13;KIAA0513;CTIF;U2AF2;GRPEL2;UBN1;FAM63B;ZC3H18;FAM192A;RREB1;BPTF;HSPA9;ATF7IP;UBE2B;SGTA;EEF2;USF2;C9ORF85;ANLN;GALE;ASXL2;POLE3;OGDH;SAE1;MEGF9
MYC CHEA	29/573	0.0163381	0.0395155	0	0	1.52672	6.28132	SETD5;DIDO1;AATF;MLLT6;TBRG4;AKAP12;RPS14;SIN3A;ERI1;DHX15;RPL35;NDUFV2;EXOSC2;SPTBN1;KPNA1;MAP2K3;EIF5B;EEF2;RANGAP1;MORF4L1;ANLN;NASP;INCENP;NCL;ASXL2;ACIN1;TRIB3;KIF20A;ANP32B
E2F1 CHEA	40/859	0.0195468	0.0462014	0	0	1.4047	5.52742	DIDO1;PNKP;FAF2;DDX23;HMGB2;NUCKS1;RRBP1;JADE2;SKA2;FGD6;SEC14L1;SUMO1;SIN3A;CBS;CLSPN;NDUFV2;BPTF;NDEL1;ATF7IP;CLUH;RDX;SGTA;HUWE1;TBCD;DDX54;CNOT10;NUP153;DEK;EEF2;ABTB2;MORF4L1;PLCB4;NASP;NCL;SMS;CD9;P4HB;OGT;CALM2;NFE2L2
RELA ENCODE	25/484	0.0197067	0.0455443	0	0	1.55816	6.11857	SETD5;ITGB2;HMGB2;METTL21A;TOB2;ACTB;KIAA1524;MAP3K5;MIR3175;NEK8;MGEA5;ABCC4;HNF1B;NUP153;EEF2;EEF1A1;TNIP1;ANP32E;PHIP;MALAT1;CDK13;SAE1;CALM2;NFE2L2;RBMS3
BCL3 ENCODE	16/273	0.0202821	0.0458552	0	0	1.76797	6.89156	ZNF276;PPP1R37;ANKRD17;NEK8;NCBP2;METTL21A;TOB2;CAPN15;ACTB;EPN1;EEF1A1;ALCAM;SIX5;ZNF205;MALAT1;MIR3175
PPARG CHEA	27/535	0.020657	0.0457092	0	0	1.52239	5.90642	CHD9;ZMYND8;ITSN1;IRS2;LTBP2;ASAP1;SHB;ACTB;FUT8;ZNF608;LURAP1L;MTHFD1L;MGAT5;UBXN7;HIVEP2;B4GALNT3;EIF5B;PHF12;SLC39A10;ACTN4;SDHA;STAG1;FMNL2;TNIP1;CD9;DCP1A;MMADHC
NFIC ENCODE	16/279	0.0242455	0.052532	0	0	1.72994	6.43457	MUS81;MGEA5;UBE2B;SLC39A10;NUP153;NEAT1;EEF1A1;RPS14;STAG1;ATXN1;FAM120A;TSPAN4;HIVEP2;GAPDH;SMIM12;FAM120AOS
NELFE ENCODE	14/234	0.024587	0.0521846	0	0	1.8048	6.68775	HMGB2;NEAT1;EEF2;TOB2;BAIAP2;ACTB;ACTG1;EEF1A1;NASP;KCNQ1OT1;MALAT1;P4HB;CALM2;GAPDH
USF2 ENCODE	43/965	0.0303291	0.0630846	0	0	1.34418	4.69878	OSER1;ATP6V1A;ARL3;HDLBP;NOL8;AATF;GIGYF2;CCAR1;ACTG1;GNA13;KIAA0513;MED13;U2AF2;UBN1;FAM63B;LONP1;ANKRD10;FAM192A;RREB1;BPTF;HSPA9;SUPT16H;CLUH;UBE2B;CCDC115;SGTA;DYRK1A;ADAM10;SARS;TSC1;NEAT1;EEF2;SUMF1;ANLN;THRAP3;TBC1D5;ZC3H11A;NCL;ASXL2;CANX;SAE1;GAPDH;MEGF9
SP2 ENCODE	44/994	0.031545	0.0643271	0	0	1.33531	4.61529	MUS81;TOP2A;SETD5;PANK2;RBM25;CDCA2;USP16;DDX46;ITSN1;ZBTB20;FOXK2;MLLT1;RRBP1;UACA;FHIT;CCDC102A;SKA2;ARVCF;FGD6;DUSP10;SEC14L1;SPTLC2;RHPN1;ABL1;DHX38;MYH10;RALGPS1;NCBP1;MAGI3;CEP131;H2AFV;PRPF40A;BAZ1B;BAIAP2;C9ORF85;BTD;INCENP;CANX;NMT1;OGDH;ANP32E;TRIP11;METAP2;MEGF9
EGR1 CHEA	17/315	0.0342211	0.0684422	0	0	1.628	5.49436	SVIL;DIDO1;SMAD3;PLAUR;ZBTB20;SARS;ACTN4;EGFR;RSPH3;LIPC;RGS3;ABL1;AP3S1;ERC1;CPEB3;PCDH1;SPTAN1
IRF3 ENCODE	31/663	0.0349749	0.0686299	0	0	1.41047	4.72949	TOP2A;PANK2;CDCA2;USP16;HMGB2;ZBTB20;FOXK2;RRBP1;NT5C2;SKA2;ARVCF;DUSP10;SPTLC2;SIN3A;FAM192A;KIAA0319L;MYH10;STIL;CEP131;DDX54;H2AFV;PRPF40A;BAZ1B;C9ORF85;RAD51B;BTD;INCENP;NMT1;ANP32E;P4HB;MEGF9
FOXP2 ENCODE	11/178	0.0353375	0.0680574	0	0	1.86419	6.23162	EXT1;GALE;UBE2B;TSPAN4;HMGB2;IRS2;TNRC18;EPN1;BPTF;NFE2L2;MIR3175
NFYA ENCODE	88/2250	0.0556878	0.105301	0	0	1.17982	3.40732	TOP2A;SETD5;ERRFI1;PANK2;C2CD3;ZMYND8;ITSN1;HMGB2;ZBTB20;NUCKS1;CCDC102A;ACTB;FAM102A;MED13;DUSP10;SPTLC2;SIN3A;SIX5;CHAC1;RALGPS1;MIR3175;MAP2K3;SAP30BP;MBNL2;CCDC115;NCBP2;MAGI3;CEP131;ADAM10;DDX54;H2AFV;PRPF40A;BAZ1B;RAD51B;BTD;INCENP;NCL;CANX;SNRPF;KIF20A;VCL;LUC7L2;CDCA2;USP16;UHRF1;ARL3;FOXK2;MLLT1;RRBP1;TOB2;SKA2;ARVCF;TMEM245;FUT8;FGD6;ZMAT2;FAM120A;UBN1;RHPN1;ABL1;ANO10;DHX38;FAM192A;MAP…
TAF7 ENCODE	29/640	0.0560354	0.104066	0	0	1.36689	3.93907	SETD5;DDX46;HDLBP;HMGB2;HSF2BP;RPS14;NIPBL;KCNQ1OT1;TSPAN4;RPL35;FAM3C;CLSPN;MIR3175;MGEA5;DYRK1A;SLC39A10;TSC1;NEAT1;EEF2;EEF1A1;SLTM;ANP32E;PHIP;CDK13;OGT;CALM2;MCU;MMADHC;METAP2
RUNX1 CHEA	53/1294	0.0648109	0.118251	0	0	1.23554	3.3808	CHD9;ZMYND8;ITGB2;SLC2A1;ARHGAP39;PIK3CB;ARHGAP6;CCAR2;PTPRF;RPS6KA2;MYO18A;EPHB2;TNS3;SLC38A1;PPP1R12A;FNBP1;H2AFV;PRKCA;SUMF1;LATS1;ASPH;THRAP3;RARA;TNIK;UBA52;VCL;PLEC;DDX23;ARHGAP18;RASAL2;NT5C2;FAM129B;MLLT6;FUT8;RXRA;GNG7;NSD1;MGAT5;NRIP1;FAM63B;TSPAN4;FNIP2;NEK8;SMAD3;PHF12;NUP153;DEK;BAIAP2;OXR1;USF2;GNAQ;CDK13;NFE2L2
NRF1 ENCODE	74/1882	0.0689326	0.123603	0	0	1.18612	3.17243	DIDO1;PLEKHB2;C2CD3;RRP1;HDLBP;FAM208B;AATF;GOLGA4;SIX5;LONP1;DLEU1;RALGPS1;KPNA1;PHACTR4;NDEL1;MAGI1;EIF5B;SMARCC1;PPP1R12A;PPTC7;ADAM10;SLC39A10;SARS;ACTN4;TUBG1;SDHA;MORF4L1;CDC34;SLTM;TBC1D5;TOP1;UBA52;THOP1;MMADHC;LUC7L2;OSER1;ATP6V1A;CDCA2;RABGAP1;DDX27;ARL3;MGST3;UQCR11;FTX;TOB2;GIGYF2;ABLIM2;ZMAT2;U2AF2;UBN2;GRPEL2;EXOSC2;NKTR;MBD3;HSPA9;SPEN;MGEA5;PHF12;CBX1;SGTA;MYO9B;EEF2;SSH2;RSPH3;AN…
SP1 ENCODE	31/707	0.0697978	0.123033	0	0	1.32269	3.52121	TOP2A;CDCA2;ITSN1;HMGB2;ZBTB20;FOXK2;MLLT1;NUCKS1;RRBP1;TOB2;FHIT;SKA2;ARVCF;SPTLC2;ZMIZ1;KCNQ1OT1;ABL1;KIAA0319L;MYH10;UBE2B;CEP131;SETD1A;H2AFV;PRPF40A;BAZ1B;C9ORF85;RAD51B;CANX;ANP32E;MALAT1;SNRPF
NR2C2 ENCODE	17/350	0.0758462	0.131467	0	0	1.4652	3.77882	ATP6V1A;PHF12;EYA3;CTR9;VPS13D;TBCD;HUS1;PRPF40A;RASAL2;BAZ1B;PARL;RPS14;TMEM248;RPL35;SNRPF;SLIRP;KIAA0319L
RAD21 ENCODE	51/1265	0.0850555	0.145013	0	0	1.21618	2.9972	APP;CHD9;PTPRF;MED13;RGS3;SIX5;MAP3K5;TGM2;SEMA6A;MORC4;ARHGEF17;MYOF;ARHGEF16;H2AFV;NCOR2;EDAR;KIF20A;MET;PLEC;ANKRD17;ATP6V1A;NXN;DDX23;NEDD4L;ASAP2;PARL;ARHGAP22;RAI1;ATXN1;FGD6;SEC14L1;HAS3;EP400;FLNB;PCDH1;SRGAP1;NEK8;SVIL;KIRREL;EEF2;SSH2;USF2;ABTB2;IRGQ;STAG1;LRCH1;NCEH1;TMEM51-AS1;TMCC2;CPEB3;NFE2L2
EGR1 ENCODE	24/537	0.0861399	0.144493	0	0	1.3482	3.30549	DIDO1;RBM25;CLUH;C2CD3;HSPA4;ARL3;MGST3;CEP131;NEDD4L;NUCKS1;MKI67;BRE;ZMIZ1;FAM120A;ERF;ZC3H18;MALAT1;FAM3C;CPEB3;SEC62;KIAA0319L;THOP1;FAM120AOS;NKTR
TRIM28 ENCODE	7/120	0.104232	0.172065	0	0	1.75968	3.97888	RABGAP1;CBX1;ARHGAP39;SLC7A11;TFPI;LUC7L2;NFE2L2
FOXA2 ENCODE	15/316	0.105148	0.170865	0	0	1.43193	3.22525	ATF7IP;ERRFI1;MGEA5;B4GALT1;ZNF282;C2ORF88;LRP5;NEDD4L;JADE2;TGFBR2;BTD;DUSP10;LURAP1L;HIVEP2;LIMS1
SIN3A ENCODE	45/1131	0.117091	0.187346	0	0	1.20024	2.57427	OSER1;DDX46;ARL3;SLC2A1;HMGB2;NOL8;SLC7A11;TOB2;SKA2;KIF15;TBRG4;ACTG1;KIAA1524;DUSP10;SEC14L1;SIX5;UBN2;FAM63B;TSPAN4;CLSPN;KPNA1;MIR3175;HSPA9;EIF5B;CCDC115;MYO9B;NEAT1;EEF2;EEF1A1;HADHA;ANLN;CENPF;GALE;BRE;NASP;OGDH;PHIP;CDK12;SNRPF;KIF20A;OGT;UBA52;GAPDH;CALM2;NFE2L2
HDAC2 ENCODE	9/175	0.128406	0.202336	0	0	1.55139	3.18432	ZNF276;EIF5B;JADE2;FAM3C;TNIK;DEK;TEAD1;BPTF;NFE2L2
FLI1 ENCODE	26/650	0.187124	0.290461	0	0	1.20664	2.0223	ATP6V1A;KDM5A;C2CD3;DDX46;PNKP;FAF2;CCAR2;TBRG4;RPS14;NIPBL;SIN3A;UBN2;GRPEL2;ARIH2;DHX38;ZC3H18;FAM192A;HSPA4;CNOT10;EPN1;MIR423;GALE;BRE;INCENP;ASXL2;CDK13
SRF ENCODE	13/299	0.195357	0.298781	0	0	1.31156	2.14168	MUS81;B4GALT1;VPS13D;NUP153;PLOD1;RASAL2;CCAR2;ACTB;NR2F6;ACTG1;MYO1E;FLNA;VCL
ERG CHEA	7/144	0.201972	0.304422	0	0	1.4664	2.34569	RBM25;PHF12;PNKP;MTHFD2L;CTR9;OGDH;MAP4
SUZ12 CHEA	62/1684	0.207876	0.308844	0	0	1.11062	1.74458	APP;NRP1;SPON1;NRP2;PODXL2;IRS1;GDA;TNFAIP2;PRKAG2;VLDLR;PRSS23;ARHGAP6;CDH6;ALCAM;ZMIZ1;MAP3K5;KIRREL3;SCARA3;PRKCH;SEMA6A;PLLP;LIMCH1;GAB1;KCTD1;PRKCA;HNF1B;PCDHA11;TGFBR2;TIAM2;VCAN;HECW2;KCNQ1;ALDH1A2;ROR1;ST6GALNAC5;GLIS3;LTBP2;MLLT3;TRHDE;EGFR;CTIF;ATXN1;SPOCK2;COBLL1;HAS3;ANO10;TNRC18;HIVEP2;PCDH1;KCNIP1;NEBL;BDNF;PCDH7;DCDC2;HMGA2;NMNAT2;BICC1;ABTB2;NFIB;MYO5B;FAT4;SNTB1
YY1 CHEA	14/332	0.214509	0.31421	0	0	1.27206	1.95821	ATF7IP;MACF1;DIDO1;TSC1;RAD51B;EEF1A1;MORF4L1;CTIF;ZC3H11A;NMT1;SLIRP;UBA52;KIAA0319L;EXOSC2
FOXA1 ENCODE	9/205	0.241283	0.34852	0	0	1.32436	1.88295	MGEA5;BTD;ZNF282;TSPAN4;HMGB2;NEDD4L;PLS3;CDK12;JADE2
REST CHEA	47/1280	0.251762	0.358675	0	0	1.10765	1.52776	PLEKHB2;NEDD4L;PIK3CB;JADE2;FNBP1L;METTL21A;KLC1;CDH6;GNA13;KIAA0513;SCEL;SEC14L1;RXRA;ZMIZ1;FLNB;TNRC18;PCDH1;ABCC4;SUPT16H;SMARCC1;SEMA6A;KCNIP1;BDNF;IQSEC1;HSPA4;PHF12;SGTA;DYRK1A;TBCD;PRKCA;CNOT10;NMNAT2;ACTN4;PTPRD;MKLN1;SPSB1;SNRK;TBC1D2;BRE;MYO5B;OGDH;TOP1;DCP1A;CALM2;MAD1L1;ST6GALNAC5;AHDC1
ZC3H11A ENCODE	6/129	0.256948	0.361115	0	0	1.40307	1.9066	PPP1R37;ABLIM3;CHD9;SETD1A;NUCKS1;PTPRF
TRIM28 CHEA	9/210	0.262856	0.364494	0	0	1.29282	1.7274	SVIL;SALL1;PPP1R12A;ERI1;NEBL;FAM3C;TOP1;TEAD1;TRHDE
BHLHE40 ENCODE	14/348	0.266736	0.365007	0	0	1.21357	1.60373	OSER1;UBE2B;NCBP1;DYRK1A;MLLT1;JADE2;NEAT1;GNA13;EME2;TBC1D5;ZC3H11A;LONP1;SAE1;BPTF
FOSL2 ENCODE	8/196	0.325203	0.439236	0	0	1.23126	1.38308	ANLN;TMEM245;RBM25;IKBKG;PKP3;EZR;FAM129B;TGFBR2
FOS ENCODE	23/637	0.366687	0.488915	0	0	1.08919	1.09273	TOP2A;CDCA2;ZMYND8;ZBTB20;H2AFV;BAZ1B;TFPI;TOB2;SKA2;ABTB2;RAD51B;CENPF;TMEM245;DUSP10;SPTLC2;INCENP;NMT1;OGDH;ABL1;ANP32E;RHPN1;P4HB;KIAA0319L
ZKSCAN1 ENCODE	5/120	0.366739	0.482795	0	0	1.25691	1.26082	MAP2K3;CAPZB;ZNF282;ELAVL1;NFE2L2
IRF1 ENCODE	10/263	0.374629	0.487017	0	0	1.14699	1.12614	ATF7IP;FAM111A;EIF5B;DUSP10;NRIP1;TMED7-TICAM2;H2AFV;TNRC18;RBCK1;SKA2
ETS1 ENCODE	6/156	0.414674	0.53242	0	0	1.16023	1.02131	MUS81;SEC14L1;RPL35;NOL8;CALM2;NFE2L2
CREB1 ENCODE	76/2238	0.42902	0.544123	0	0	1.0244	0.866901	KDM5A;DOCK4;PLEKHB2;C2CD3;RRP1;HSF2BP;BRCA2;AATF;CAPN15;CCAR2;KIF15;LONP1;ARIH2;AP3S1;TEAD1;CDK5RAP2;MIR3175;SAP30BP;RFC1;NCBP1;NCBP2;CEP131;DYRK1A;H2AFV;PRPF40A;TSC1;RANGAP1;INIP;EPN1;WDR33;EEF1A1;MORF4L1;THRAP3;ERF;UBA52;LUC7L2;OSER1;FTO;ANKRD17;DDX27;USP16;PNKP;CTR9;DDX23;FOXK2;PSEN1;TOB2;KLC1;TBRG4;FGD6;UBN2;UBN1;DHX38;ZC3H18;MAP4;RCE1;ZC3H13;STIL;HSPA4;SGTA;NUP153;EEF2;MIR423;EXT1;IRGQ;SNRK;…
ZBTB33 ENCODE	24/702	0.468049	0.586472	0	0	1.03131	0.782954	FTO;SETD5;DIDO1;EIF5B;PPP1R12A;HSPA4;PHF12;FAM208B;CD2AP;MIR423;KIAA1524;TMEM245;ASPH;MIR4523;TBC1D5;DMXL1;NCL;POLE3;EP400;CDK12;SEC62;CHMP6;MAD1L1;NKTR
ZEB1 ENCODE	4/106	0.468504	0.580053	0	0	1.13834	0.863098	ATXN1;MGST3;FLNA;FHIT
HNF4A ENCODE	43/1276	0.478313	0.58523	0	0	1.01656	0.749705	ZNF276;B4GALT1;IRS1;UQCR11;TOB2;METTL21A;PPL;LASP1;ATXN1;LURAP1L;RREB1;TNS3;PHACTR4;MIR3175;ABCC3;CMTM7;PRELID2;PHF12;NEK6;ARHGEF16;GAB1;HUS1;COBL;DDX54;PRPF40A;ACTN4;BAZ1B;NEAT1;NR2F6;HADHA;GALE;AIM1;CDC34;BRE;MYO5B;TMEM51-AS1;DOK7;ERF;FAT4;OBSL1;CALM2;MMADHC;NFE2L2
STAT5A ENCODE	8/233	0.510237	0.617031	0	0	1.03574	0.696928	ZNF276;TMEM248;CANX;DDX23;H2AFV;MIR21;BRCA2;NFE2L2
PML ENCODE	53/1596	0.516073	0.616915	0	0	1.00175	0.662665	SETD5;HMGB2;NUCKS1;BRCA2;CAPN15;CCAR2;CCAR1;ACTG1;MED13;SIX5;RPL35;WHSC1;SEC62;SKP1;MIR3175;SAP30BP;PPP1R12A;NCBP1;ZNF282;NCBP2;SLC39A10;DDX54;CD2AP;LATS1;EEF1A1;NCL;EZR;GAPDH;ZNF276;OSER1;ANKRD17;NOL8;TOB2;KIAA1524;MIR4523;KCNQ1OT1;GRPEL2;RCE1;CLSPN;KIAA0319L;PAK2;MGEA5;HSPA4;EEF2;USF2;RSPH3;ASXL2;TRIP11;P4HB;SLIRP;CDK13;CALM2;NFE2L2
VDR CHEA	2/76	0.722421	0.853771	0	0	0.79384	0.258114	MYO9B;HIVEP2
CBX3 ENCODE	2/81	0.754435	0.881587	0	0	0.744837	0.209885	RFC1;FAM208A
BCLAF1 ENCODE	25/851	0.762052	0.880593	0	0	0.88619	0.240814	MUS81;RBM25;CTR9;NOL8;CCAR2;NIPBL;ERI1;EME2;GRPEL2;MIR3175;EIF5B;NCBP1;HUS1;PRPF40A;NUP153;MIR21;EPN1;EEF1A1;RSPH3;SLTM;TNIK;DCP1A;OGT;LUC7L2;NFE2L2
IRF8 CHEA	3/121	0.769331	0.879235	0	0	0.747915	0.196129	RAD51B;PTPRJ;RBCK1
SPI1 CHEA	31/1056	0.784366	0.886674	0	0	0.885552	0.215083	ATP6V1A;KDM5A;RBM25;PODXL2;ITGB2;PRKAG2;PTPRJ;PSEN1;TOB2;BRCA2;ARHGAP6;RPS14;MTHFD1L;ZC3H18;SPTAN1;PAK2;CDK5RAP2;PHF12;MYO9B;NEAT1;SSH2;RSPH3;NCEH1;SLTM;TNIP1;INCENP;ASXL2;CANX;THOP1;VGLL4;LIMS1
EZH2 ENCODE	9/338	0.792485	0.886219	0	0	0.803234	0.186818	MUS81;SPON1;PLLP;HAS3;EFCAB13;P4HB;SLIRP;TRHDE;SKA2
EZH2 CHEA	6/237	0.801536	0.886806	0	0	0.763694	0.168949	PRKCH;KCNQ1;SIRPA;HNF1B;TNRC18;TTC7A
MYOD1 ENCODE	4/166	0.804554	0.880775	0	0	0.726889	0.158075	CDC34;ABLIM2;LURAP1L;TNC
SIX5 ENCODE	30/1094	0.88224	0.95576	0	0	0.827219	0.103643	FTO;DOCK4;C2CD3;ITSN1;DDX23;TOB2;FHIT;SIPA1L3;CAPN15;CTIF;TMEM245;FGD6;ABLIM2;ABL1;KIAA0319L;CDK5RAP2;PHACTR4;EIF5B;CCDC115;PHF12;NUP153;RANGAP1;RAD51B;MORF4L1;THRAP3;ZC3H11A;NMT1;CPEB3;DCP1A;UBA52
ATF3 ENCODE	2/114	0.895498	0.960122	0	0	0.529227	0.0584133	SGTA;LONP1
GABPA ENCODE	59/2082	0.915498	0.971549	0	0	0.854846	0.0754717	MUS81;KDM5A;C2CD3;DDX46;FAF2;ELAVL1;CCAR2;GOLGA3;RPS14;NIPBL;CAPZB;SUMO1;EME2;LONP1;ARIH2;RPL35;AP3S1;SMIM12;EIF5B;SAP30BP;SUPT16H;NCBP1;NCBP2;HUS1;EPN1;INCENP;TRIB3;UBA52;LUC7L2;ZNF276;ATP6V1A;DDX27;USP16;PNKP;CTR9;NOL8;MLLT1;UQCR11;PARL;TBRG4;SEC14L1;TCOF1;ERI1;FAM120A;GRPEL2;DHX38;ZC3H13;KIAA0319L;FAM120AOS;EYA3;SGTA;CNOT10;NUP153;RSPH3;BRE;P4HB;SLIRP;CDK13;DCP1A
SPI1 ENCODE	42/1540	0.924665	0.971366	0	0	0.822707	0.0644373	PPP1R37;PANK2;DOCK4;PODXL2;CHD9;NOL8;ASAP2;PSEN1;SIPA1L3;CCAR2;ZMIZ1;U2AF2;SIN3A;UBN2;FAM120A;PCED1B;AP3S1;IKBKG;ZBED6;RNF111;FAM120AOS;PHACTR4;NEK8;SPEN;SUPT16H;SGTA;CNOT10;NUP153;ACTN4;MKLN1;HADHA;ANLN;GALE;NCEH1;INCENP;RILPL1;ZC3H11A;ASXL2;ERF;ANP32B;NFE2L2;PLEC
KAT2A ENCODE	1/90	0.952209	0.990298	0	0	0.335177	0.0164138	CALM2
ELF1 ENCODE	68/2483	0.964645	0.993298	0	0	0.826131	0.0297369	ITGB1;KDM5A;DIDO1;DOCK4;C2CD3;FAM208A;BRCA2;AATF;SIPA1L3;CCAR2;GOLGA3;RPS14;SPTLC2;EME2;AP3S1;SMIM12;MIR3175;SAP30BP;SUPT16H;TANGO6;PRKCH;NCBP1;CCDC115;NCBP2;ADAM10;RANGAP1;INIP;EPN1;TBC1D2;INCENP;MTHFD2L;CANX;CHMP6;UBA52;ANKRD17;DDX27;USP16;DDX23;NOL8;UQCR11;TBRG4;TMEM245;SEC14L1;ZMAT2;U2AF2;ERI1;TMEM248;ZNHIT6;GRPEL2;ANKRD10;DHX38;ZC3H18;FAM192A;RCE1;ZC3H13;STIL;MYO9B;CNOT10;NUP153;FAM111A;ITCH…
REST ENCODE	7/383	0.972174	0.991236	0	0	0.551335	0.0155591	OSER1;ABLIM2;PODXL2;BDNF;MIR4523;NMNAT2;KIAA0319L
RFX5 ENCODE	11/559	0.979687	0.989198	0	0	0.593605	0.0121822	FAM111A;ARVCF;MBNL2;CDCA2;NASP;KCNQ1OT1;UBN1;TOB2;PLCXD2;SKA2;MIR3175

## Sheet: KEGG 2019 Human
Term	Overlap	P-value	Adjusted P-value	Old P-value	Old Adjusted P-value	Odds Ratio	Combined Score	Genes
Adherens junction	13/72	6.08708e-07	0.000187482	0	0	5.44662	77.9517	SMAD3;PTPRJ;LMO7;ACTN4;BAIAP2;PTPRF;ACTB;EGFR;ACTG1;TGFBR2;PARD3;MET;VCL
Axon guidance	18/181	3.42769e-05	0.00527865	0	0	2.99993	30.8423	ITGB1;NRP1;SEMA6A;PRKCA;PIK3CB;SSH2;RGS3;ABLIM2;ABLIM3;PARD3;ABL1;PLXNB2;SRGAP3;EPHB2;SRGAP1;MET;PAK2;EPHA2
Rap1 signaling pathway	19/206	5.92278e-05	0.00608072	0	0	2.78229	27.0832	MAP2K3;MAGI1;ITGB1;DOCK4;MAGI3;ITGB2;PRKCA;PIK3CB;SIPA1L3;ACTB;EGFR;ACTG1;PLCB4;PARD3;GNAQ;PDGFC;CALM2;MET;EPHA2
Regulation of actin cytoskeleton	19/214	9.87312e-05	0.00760231	0	0	2.67828	24.7021	ITGB1;PPP1R12A;ITGA3;RDX;ITGB2;ACTN4;PIK3CB;SSH2;BAIAP2;ACTB;EGFR;ACTG1;GNA13;SPATA13;PDGFC;EZR;PAK2;MYH10;VCL
Non-alcoholic fatty liver disease (NAFLD)	15/149	0.000131963	0.00812891	0	0	3.03684	27.128	IRS1;PRKAG2;IRS2;UQCR11;PIK3CB;SDHA;MAPK10;ITCH;RXRA;COX3;COX2;COX1;CYTB;NDUFV2;MAP3K5
Tight junction	16/170	0.000175851	0.00902704	0	0	2.83914	24.5469	MAGI1;ITGB1;HSPA4;RDX;NEDD4L;PRKAG2;ACTN4;ACTB;ACTG1;MAPK10;PARD3;AMOTL1;CLDN16;EZR;MYH10;MAP3K5
Insulin resistance	12/108	0.000243521	0.0107149	0	0	3.35177	27.8877	PTPA;MAPK10;IRS1;RPS6KA2;SLC2A1;PRKAG2;IRS2;TRIB3;PIK3CB;OGT;PTPRF;CREB5
Thermogenesis	19/231	0.000266476	0.0102593	0	0	2.48118	20.4207	MAP2K3;SMARCC1;PRKAG2;UQCR11;TSC1;SDHA;ACTB;ACTG1;RPS6KA2;COX3;COX2;COX1;CYTB;NDUFV2;MGLL;ND5;MAP3K5;ND4;CREB5
Focal adhesion	17/199	0.000355597	0.0121693	0	0	2.57699	20.4657	ITGB1;PPP1R12A;ITGA3;TNC;PRKCA;ACTN4;PIK3CB;ACTB;EGFR;ACTG1;MAPK10;PDGFC;FLNA;FLNB;PAK2;MET;VCL
Proteoglycans in cancer	17/201	0.000399409	0.0123018	0	0	2.55135	19.9656	ITGB1;PPP1R12A;RDX;GAB1;PLAUR;PRKCA;MIR21;ITPR3;PIK3CB;HSPG2;ACTB;EGFR;ACTG1;FLNA;FLNB;EZR;MET
Spliceosome	13/134	0.000520091	0.0145626	0	0	2.92654	22.1291	RBM25;DDX46;NCBP1;NCBP2;DDX23;PRPF40A;THOC2;ZMAT2;U2AF2;DHX15;DHX38;ACIN1;SNRPF
Alzheimer disease	15/171	0.000588246	0.0150983	0	0	2.64613	19.6829	APP;ADAM10;ITPR3;UQCR11;PSEN1;SDHA;PLCB4;GNAQ;COX3;COX2;COX1;CYTB;NDUFV2;CALM2;GAPDH
Gastric acid secretion	9/75	0.00081681	0.0193521	0	0	3.61991	25.7379	PLCB4;KCNQ1;GNAQ;KCNJ16;PRKCA;ITPR3;EZR;CALM2;ACTB
Ras signaling pathway	17/232	0.00195915	0.0431012	0	0	2.21043	13.7826	BDNF;GAB1;PRKCA;RASAL2;PIK3CB;EGFR;MAPK10;GNG7;PDGFC;ABL1;NF1;ABL2;IKBKG;CALM2;PAK2;MET;EPHA2
ErbB signaling pathway	9/85	0.00199953	0.0410569	0	0	3.19404	19.8505	MAPK10;GAB1;ABL1;ABL2;PRKCA;PIK3CB;PAK2;EGFR;EREG
Pathogenic Escherichia coli infection	7/55	0.00217197	0.0418105	0	0	3.8393	23.543	ITGB1;NCL;ABL1;PRKCA;EZR;ACTB;ACTG1
Bacterial invasion of epithelial cells	8/74	0.00307253	0.0556669	0	0	3.26118	18.8668	ITGB1;GAB1;PIK3CB;MET;ACTB;VCL;ACTG1;CD2AP
Hepatocellular carcinoma	13/168	0.00402402	0.0688554	0	0	2.33427	12.8746	SMARCC1;SMAD3;MGST3;GAB1;LRP5;PRKCA;PIK3CB;ACTB;EGFR;ACTG1;TGFBR2;MET;NFE2L2
Leukocyte transendothelial migration	10/112	0.00408151	0.0661634	0	0	2.69339	14.8171	ITGB1;ITGB2;PRKCA;ACTN4;PIK3CB;CLDN16;EZR;ACTB;VCL;ACTG1
Thyroid hormone signaling pathway	10/116	0.00523313	0.0805902	0	0	2.60051	13.6598	THRB;MED13;PLCB4;RXRA;SIN3A;SLC2A1;PRKCA;PIK3CB;ACTB;ACTG1
Shigellosis	7/65	0.00561135	0.0822998	0	0	3.24864	16.8376	ITGB1;MAPK10;ABL1;IKBKG;ACTB;VCL;ACTG1
Inflammatory mediator regulation of TRP channels	9/100	0.00597453	0.0836435	0	0	2.71493	13.9011	MAP2K3;MAPK10;PRKCH;PLCB4;GNAQ;PRKCA;ITPR3;PIK3CB;CALM2
Neurotrophin signaling pathway	10/119	0.00625272	0.0837321	0	0	2.53495	12.8642	MAPK10;IRS1;BDNF;RPS6KA2;ABL1;GAB1;PSEN1;PIK3CB;CALM2;MAP3K5
Aldosterone-regulated sodium reabsorption	5/37	0.00714389	0.09168	0	0	4.07647	20.1439	IRS1;SCNN1A;NEDD4L;PRKCA;PIK3CB
Adipocytokine signaling pathway	7/69	0.00776709	0.0956906	0	0	3.06031	14.8666	MAPK10;RXRA;IRS1;SLC2A1;PRKAG2;IRS2;IKBKG
Parathyroid hormone synthesis, secretion and action	9/106	0.00867093	0.102717	0	0	2.56126	12.1603	GNA13;PLCB4;RXRA;GNAQ;LRP5;PRKCA;ITPR3;EGFR;CREB5
MAPK signaling pathway	18/295	0.00985942	0.11247	0	0	1.84063	8.50248	MAP2K3;BDNF;PRKCA;EGFR;EREG;TGFBR2;MAPK10;DUSP10;RPS6KA2;PDGFC;NF1;FLNA;FLNB;IKBKG;PAK2;MET;EPHA2;MAP3K5
GnRH signaling pathway	8/93	0.0120502	0.132552	0	0	2.59492	11.4661	MAP2K3;MAPK10;PLCB4;GNAQ;PRKCA;ITPR3;CALM2;EGFR
Pancreatic cancer	7/75	0.0120682	0.128173	0	0	2.81549	12.4365	MAPK10;SMAD3;PIK3CB;IKBKG;BRCA2;EGFR;TGFBR2
Huntington disease	13/193	0.0123748	0.127048	0	0	2.0319	8.9243	BDNF;UQCR11;SDHA;PLCB4;SIN3A;GNAQ;COX3;COX2;COX1;CYTB;NDUFV2;TGM2;CREB5
Oxytocin signaling pathway	11/153	0.0131354	0.130506	0	0	2.16879	9.39617	PPP1R12A;PLCB4;GNAQ;PRKAG2;PRKCA;ITPR3;EEF2;CALM2;ACTB;EGFR;ACTG1
Oxidative phosphorylation	10/133	0.0131902	0.126956	0	0	2.26811	9.81703	ATP6V1A;COX3;COX2;COX1;UQCR11;CYTB;SDHA;NDUFV2;ND5;ND4
PI3K-Akt signaling pathway	20/354	0.0148621	0.138712	0	0	1.70429	7.17326	MAGI1;ITGB1;IRS1;BDNF;ITGA3;TNC;PRKCA;TSC1;PIK3CB;PPP2R3A;EGFR;EREG;RXRA;GNG7;PDGFC;IL3RA;IKBKG;MET;EPHA2;CREB5
Fluid shear stress and atherosclerosis	10/139	0.017497	0.158503	0	0	2.17021	8.78007	MAPK10;SUMO1;MGST3;PIK3CB;IKBKG;CALM2;ACTB;ACTG1;MAP3K5;NFE2L2
Sphingolipid signaling pathway	9/119	0.0175653	0.154574	0	0	2.28146	9.22126	GNA13;MAPK10;PLCB4;SPTLC2;GNAQ;PRKCA;PIK3CB;PPP2R3A;MAP3K5
AMPK signaling pathway	9/120	0.0184523	0.15787	0	0	2.26244	9.03295	IRS1;PRKAG2;IRS2;TSC1;PIK3CB;PPP2R3A;EEF2;ELAVL1;CREB5
Apoptosis	10/143	0.0208941	0.173929	0	0	2.1095	8.16018	MAPK10;IL3RA;DAB2IP;ITPR3;PIK3CB;IKBKG;SPTAN1;ACTB;ACTG1;MAP3K5
Platelet activation	9/124	0.0223275	0.18097	0	0	2.18946	8.3242	ITGB1;GNA13;PPP1R12A;PLCB4;GNAQ;ITPR3;PIK3CB;ACTB;ACTG1
Long-term potentiation	6/67	0.0234503	0.185198	0	0	2.70143	10.1381	PLCB4;RPS6KA2;GNAQ;PRKCA;ITPR3;CALM2
Salmonella infection	7/86	0.0240113	0.184887	0	0	2.45536	9.15663	MAPK10;FLNA;FLNB;KLC1;MYH10;ACTB;ACTG1
Vibrio cholerae infection	5/50	0.0244803	0.183901	0	0	3.01659	11.1912	ATP6V1A;KCNQ1;PRKCA;ACTB;ACTG1
Epithelial cell signaling in Helicobacter pylori infection	6/68	0.025025	0.183517	0	0	2.6617	9.81602	ATP6V1A;MAPK10;ADAM10;IKBKG;MET;EGFR
Retrograde endocannabinoid signaling	10/148	0.0257865	0.184704	0	0	2.03824	7.45567	MAPK10;PLCB4;GNAQ;GNG7;PRKCA;ITPR3;NDUFV2;ND5;MGLL;ND4
Relaxin signaling pathway	9/130	0.0291838	0.204287	0	0	2.08841	7.38073	MAPK10;SMAD3;PLCB4;GNG7;PRKCA;PIK3CB;EGFR;TGFBR2;CREB5
TNF signaling pathway	8/110	0.0299384	0.204912	0	0	2.19388	7.69749	MAP2K3;MAPK10;ITCH;DAB2IP;PIK3CB;IKBKG;MAP3K5;CREB5
Dopaminergic synapse	9/131	0.0304553	0.203918	0	0	2.07247	7.23601	MAPK10;PLCB4;GNAQ;GNG7;PRKCA;ITPR3;PPP2R3A;CALM2;CREB5
Cholinergic synapse	8/112	0.0328408	0.215212	0	0	2.15471	7.36066	PLCB4;KCNQ1;GNAQ;GNG7;PRKCA;ITPR3;PIK3CB;CREB5
African trypanosomiasis	4/37	0.033283	0.213566	0	0	3.26118	11.0968	PLCB4;GNAQ;PRKCA;THOP1
Endocytosis	14/244	0.0334206	0.210072	0	0	1.73083	5.88237	SMAD3;SMURF2;IQSEC1;NEDD4L;ASAP1;ASAP2;EGFR;EPN1;TGFBR2;ITCH;CAPZB;PARD3;CHMP6;RAB11FIP3
Thyroid hormone synthesis	6/74	0.0359554	0.221485	0	0	2.44588	8.13373	PLCB4;GNAQ;CANX;PRKCA;ITPR3;CREB5
Amoebiasis	7/96	0.0403401	0.243623	0	0	2.1996	7.06161	PLCB4;GNAQ;ITGB2;PRKCA;PIK3CB;ACTN4;VCL
Lysine degradation	5/59	0.0455351	0.269708	0	0	2.55643	7.89752	HADHA;SETD2;NSD1;SETD1A;PLOD1
Viral myocarditis	5/59	0.0455351	0.264619	0	0	2.55643	7.89752	ITGB2;ABL1;ABL2;ACTB;ACTG1
Parkinson disease	9/142	0.0470547	0.268386	0	0	1.91192	5.84369	COX3;COX2;COX1;UQCR11;CYTB;SDHA;NDUFV2;ND5;ND4
Long-term depression	5/60	0.0483784	0.270919	0	0	2.51383	7.61363	GNA13;PLCB4;GNAQ;PRKCA;ITPR3
RNA transport	10/165	0.0484916	0.266704	0	0	1.82824	5.53291	EEF1A1;EIF5B;SUMO1;NCBP1;NCBP2;ACIN1;SNORD3A;NUP153;THOC2;RANGAP1
Pathways in cancer	25/530	0.0497197	0.268661	0	0	1.42292	4.27069	ITGB1;MGST3;LRP5;SLC2A1;PIK3CB;BRCA2;EGFR;GNA13;RXRA;GNG7;ABL1;IKBKG;SKP1;SMAD3;ITGA3;PRKCA;TGFBR2;MAPK10;PLCB4;GNAQ;IL3RA;RARA;MET;CALM2;NFE2L2
Human immunodeficiency virus 1 infection	12/212	0.0506172	0.268795	0	0	1.7075	5.09428	DCAF1;MAP2K3;MAPK10;GNAQ;GNG7;PRKCA;ITPR3;IKBKG;PIK3CB;CALM2;PAK2;SKP1
Chagas disease (American trypanosomiasis)	7/103	0.055271	0.288533	0	0	2.05011	5.93611	MAPK10;SMAD3;PLCB4;GNAQ;PIK3CB;IKBKG;TGFBR2
Glucagon signaling pathway	7/103	0.055271	0.283724	0	0	2.05011	5.93611	PLCB4;GNAQ;SLC2A1;PRKAG2;ITPR3;CALM2;CREB5
Cortisol synthesis and secretion	5/65	0.0641341	0.323825	0	0	2.32045	6.37378	PLCB4;NCEH1;GNAQ;ITPR3;CREB5
Type II diabetes mellitus	4/46	0.0653695	0.324739	0	0	2.62312	7.15509	MAPK10;IRS1;IRS2;PIK3CB
Colorectal cancer	6/86	0.0659319	0.322334	0	0	2.1046	5.72268	MAPK10;SMAD3;PIK3CB;EGFR;EREG;TGFBR2
Insulin secretion	6/86	0.0659319	0.317297	0	0	2.1046	5.72268	PLCB4;GNAQ;SLC2A1;PRKCA;ITPR3;CREB5
Non-small cell lung cancer	5/66	0.0675923	0.320284	0	0	2.2853	6.15718	RXRA;PRKCA;PIK3CB;FHIT;EGFR
Gap junction	6/88	0.0720154	0.336072	0	0	2.05677	5.4111	PLCB4;GNAQ;PDGFC;PRKCA;ITPR3;EGFR
Human cytomegalovirus infection	12/225	0.0722958	0.332345	0	0	1.60885	4.22643	GNA13;PLCB4;GNAQ;GNG7;PRKCA;TSC1;ITPR3;IKBKG;PIK3CB;CALM2;EGFR;CREB5
FoxO signaling pathway	8/132	0.0726583	0.329099	0	0	1.82824	4.79361	MAPK10;SMAD3;IRS1;PRKAG2;IRS2;PIK3CB;EGFR;TGFBR2
Vascular smooth muscle contraction	8/132	0.0726583	0.32433	0	0	1.82824	4.79361	GNA13;PRKCH;PPP1R12A;PLCB4;GNAQ;PRKCA;ITPR3;CALM2
Renal cell carcinoma	5/69	0.0785744	0.345727	0	0	2.18594	5.56039	SLC2A1;GAB1;PIK3CB;MET;PAK2
Wnt signaling pathway	9/158	0.0804303	0.348909	0	0	1.71831	4.33077	MAPK10;SMAD3;PLCB4;LRP5;PRKCA;ROR1;PSEN1;LGR4;SKP1
Cellular senescence	9/160	0.0854064	0.36535	0	0	1.69683	4.17477	MAP2K3;SMAD3;HUS1;TSC1;ITPR3;PIK3CB;CALM2;MCU;TGFBR2
Hippo signaling pathway	9/160	0.0854064	0.360345	0	0	1.69683	4.17477	LATS1;SMAD3;PARD3;ITGB2;FAT4;TEAD1;ACTB;ACTG1;TGFBR2
Apelin signaling pathway	8/137	0.0858379	0.357271	0	0	1.76151	4.32503	GNA13;SMAD3;PLCB4;GNAQ;GNG7;PRKAG2;ITPR3;CALM2
Estrogen signaling pathway	8/137	0.0858379	0.352508	0	0	1.76151	4.32503	PLCB4;GNAQ;RARA;ITPR3;PIK3CB;CALM2;EGFR;CREB5
Insulin signaling pathway	8/137	0.0858379	0.347869	0	0	1.76151	4.32503	MAPK10;IRS1;PRKAG2;IRS2;TSC1;PIK3CB;CALM2;PTPRF
Ubiquitin mediated proteolysis	8/137	0.0858379	0.343352	0	0	1.76151	4.32503	ITCH;CDC34;UBE2B;SMURF2;HUWE1;NEDD4L;SAE1;SKP1
Small cell lung cancer	6/93	0.0885809	0.349781	0	0	1.94619	4.71725	ITGB1;RXRA;ITGA3;PIK3CB;IKBKG;FHIT
Bile secretion	5/72	0.0904526	0.352651	0	0	2.09486	5.03379	ABCC3;ABCC4;RXRA;NCEH1;SLC2A1
Hepatitis B	9/163	0.0932081	0.358851	0	0	1.6656	3.95234	MAP2K3;MAPK10;SMAD3;PRKCA;PIK3CB;IKBKG;HSPG2;TGFBR2;CREB5
cGMP-PKG signaling pathway	9/166	0.101413	0.38562	0	0	1.6355	3.74293	GNA13;PPP1R12A;PLCB4;IRS1;GNAQ;IRS2;ITPR3;CALM2;CREB5
Circadian entrainment	6/97	0.103204	0.387643	0	0	1.86593	4.23763	PLCB4;GNAQ;GNG7;PRKCA;ITPR3;CALM2
Fanconi anemia pathway	4/54	0.103565	0.384314	0	0	2.23451	5.06688	MUS81;EME2;BRCA2;FAAP100
Aldosterone synthesis and secretion	6/98	0.107045	0.392499	0	0	1.84689	4.12689	PLCB4;GNAQ;PRKCA;ITPR3;CALM2;CREB5
Chronic myeloid leukemia	5/76	0.10764	0.390035	0	0	1.9846	4.42361	SMAD3;ABL1;PIK3CB;IKBKG;TGFBR2
Regulation of lipolysis in adipocytes	4/55	0.108929	0.390117	0	0	2.19388	4.86398	IRS1;IRS2;PIK3CB;MGLL
Choline metabolism in cancer	6/99	0.11096	0.392822	0	0	1.82824	4.01954	MAPK10;PDGFC;TSC1;PRKCA;PIK3CB;EGFR
Phosphatidylinositol signaling system	6/99	0.11096	0.388359	0	0	1.82824	4.01954	INPP4A;PLCB4;PRKCA;ITPR3;PIK3CB;CALM2
Human T-cell leukemia virus 1 infection	11/219	0.113138	0.391534	0	0	1.51518	3.30181	MAPK10;NRP1;SMAD3;CANX;ITGB2;SLC2A1;IKBKG;PIK3CB;MAD1L1;TGFBR2;CREB5
AGE-RAGE signaling pathway in diabetic complications	6/100	0.114946	0.393371	0	0	1.80995	3.91546	MAPK10;SMAD3;PLCB4;PRKCA;PIK3CB;TGFBR2
Cardiac muscle contraction	5/78	0.116789	0.395287	0	0	1.93371	4.15242	COX3;COX2;UQCR11;COX1;CYTB
Phospholipase D signaling pathway	8/148	0.119403	0.399741	0	0	1.63059	3.46541	GNA13;PLCB4;PDGFC;GAB1;TSC1;PRKCA;PIK3CB;EGFR
RNA degradation	5/79	0.121498	0.402381	0	0	1.90923	4.02439	HSPA9;CNOT10;TOB2;DCP1A;EXOSC2
Oocyte meiosis	7/125	0.122011	0.39978	0	0	1.68929	3.55367	SLK;RPS6KA2;ITPR3;CPEB3;CALM2;MAD1L1;SKP1
Gastric cancer	8/149	0.122759	0.397996	0	0	1.61965	3.39727	SMAD3;RXRA;GAB1;LRP5;PIK3CB;MET;EGFR;TGFBR2
Longevity regulating pathway	6/102	0.123132	0.395048	0	0	1.77447	3.71662	IRS1;PRKAG2;IRS2;TSC1;PIK3CB;CREB5
mTOR signaling pathway	8/152	0.133119	0.422686	0	0	1.58768	3.20158	ATP6V1A;IRS1;RPS6KA2;LRP5;TSC1;PRKCA;PIK3CB;FNIP2
ECM-receptor interaction	5/82	0.136142	0.427876	0	0	1.83938	3.66783	ITGB1;ITGA3;TNC;AGRN;HSPG2
One carbon pool by folate	2/20	0.140981	0.438606	0	0	3.01659	5.9099	MTHFD1L;MTHFD2L
Th17 cell differentiation	6/107	0.144794	0.445967	0	0	1.69155	3.26881	MAPK10;SMAD3;RXRA;RARA;IKBKG;TGFBR2
Hypertrophic cardiomyopathy (HCM)	5/85	0.151526	0.462079	0	0	1.77447	3.34841	ITGB1;ITGA3;PRKAG2;ACTB;ACTG1
Homologous recombination	3/41	0.153939	0.464835	0	0	2.20726	4.13023	MUS81;RAD51B;BRCA2
Other types of O-glycan biosynthesis	2/22	0.164327	0.491385	0	0	2.74236	4.95242	B4GALT1;OGT
Transcriptional misregulation in cancer	9/186	0.166011	0.491647	0	0	1.45964	2.62108	FUT8;RXRA;SIN3A;RARA;HMGA2;MLLT1;MLLT3;MET;TGFBR2
Central carbon metabolism in cancer	4/65	0.168747	0.494993	0	0	1.85636	3.30312	SLC2A1;PIK3CB;MET;EGFR
Serotonergic synapse	6/113	0.172892	0.502365	0	0	1.60173	2.81118	APP;PLCB4;GNAQ;GNG7;PRKCA;ITPR3
Glutamatergic synapse	6/114	0.177781	0.511742	0	0	1.58768	2.74225	SLC38A1;PLCB4;GNAQ;GNG7;PRKCA;ITPR3
Salivary secretion	5/90	0.17867	0.509541	0	0	1.67588	2.88623	PLCB4;GNAQ;PRKCA;ITPR3;CALM2
Protein processing in endoplasmic reticulum	8/165	0.182806	0.516554	0	0	1.46259	2.48542	MAPK10;CANX;RRBP1;P4HB;SEC62;MAP3K5;SKP1;NFE2L2
mRNA surveillance pathway	5/91	0.184307	0.516058	0	0	1.65747	2.80303	NCBP1;NCBP2;ACIN1;PPP2R3A;WDR33
Glycosphingolipid biosynthesis	3/45	0.186737	0.518153	0	0	2.01106	3.37467	B4GALT1;B3GALT5;ST6GALNAC5
Fc epsilon RI signaling pathway	4/68	0.188576	0.518585	0	0	1.77447	2.96025	MAP2K3;MAPK10;PRKCA;PIK3CB
Renin secretion	4/69	0.195346	0.532447	0	0	1.74875	2.85568	PLCB4;GNAQ;ITPR3;CALM2
Adrenergic signaling in cardiomyocytes	7/145	0.206656	0.558334	0	0	1.45629	2.29612	PLCB4;KCNQ1;GNAQ;PRKCA;PPP2R3A;CALM2;CREB5
Human papillomavirus infection	14/330	0.208316	0.557924	0	0	1.27977	2.00757	MAGI1;ATP6V1A;ITGB1;ITGA3;TNC;TSC1;PSEN1;PIK3CB;PPP2R3A;TUBG1;EGFR;PARD3;IKBKG;CREB5
Endocrine and other factor-regulated calcium reabsorption	3/48	0.212408	0.563981	0	0	1.88537	2.9209	PLCB4;GNAQ;PRKCA
Arrhythmogenic right ventricular cardiomyopathy (ARVC)	4/72	0.216081	0.56883	0	0	1.67588	2.56762	ITGB1;ITGA3;ACTB;ACTG1
Melanoma	4/72	0.216081	0.564009	0	0	1.67588	2.56762	PDGFC;PIK3CB;MET;EGFR
Prostate cancer	5/97	0.219399	0.567856	0	0	1.55494	2.35864	PDGFC;PIK3CB;IKBKG;EGFR;CREB5
Pancreatic secretion	5/98	0.22544	0.578628	0	0	1.53908	2.29277	PLCB4;KCNQ1;GNAQ;PRKCA;ITPR3
N-Glycan biosynthesis	3/50	0.229922	0.585256	0	0	1.80995	2.66066	FUT8;B4GALT1;MGAT5
Progesterone-mediated oocyte maturation	5/99	0.231529	0.584516	0	0	1.52353	2.229	MAPK10;RPS6KA2;PIK3CB;CPEB3;MAD1L1
Phototransduction	2/28	0.237337	0.594308	0	0	2.15471	3.09906	PDE6A;CALM2
Glioma	4/75	0.23738	0.589622	0	0	1.60885	2.31367	PRKCA;PIK3CB;CALM2;EGFR
HIF-1 signaling pathway	5/100	0.237665	0.585606	0	0	1.5083	2.16726	SLC2A1;PRKCA;PIK3CB;GAPDH;EGFR
Pertussis	4/76	0.244588	0.597882	0	0	1.58768	2.23574	ITGB1;MAPK10;ITGB2;CALM2
Glycosaminoglycan biosynthesis	3/53	0.256651	0.62243	0	0	1.7075	2.32227	EXT1;FUT8;B4GALT1
Citrate cycle (TCA cycle)	2/30	0.262137	0.630767	0	0	2.01106	2.69259	OGDH;SDHA
Nicotinate and nicotinamide metabolism	2/30	0.262137	0.625877	0	0	2.01106	2.69259	NMNAT2;NT5C2
C-type lectin receptor signaling pathway	5/104	0.262629	0.62223	0	0	1.45028	1.93905	MAPK10;ITPR3;PIK3CB;IKBKG;CALM2
Circadian rhythm	2/31	0.274548	0.645503	0	0	1.94619	2.5157	PRKAG2;SKP1
Galactose metabolism	2/31	0.274548	0.640613	0	0	1.94619	2.5157	GALE;B4GALT1
beta-Alanine metabolism	2/31	0.274548	0.635796	0	0	1.94619	2.5157	HADHA;SMS
Glutathione metabolism	3/56	0.283771	0.65225	0	0	1.61603	2.03553	MGST3;SMS;CHAC1
MicroRNAs in cancer	12/299	0.290178	0.662035	0	0	1.21067	1.49792	MIR423;IRS1;RDX;TNC;ABL1;HMGA2;PRKCA;MIR21;IRS2;EZR;MET;EGFR
DNA replication	2/36	0.336198	0.761391	0	0	1.67588	1.8268	RFC1;POLE3
Influenza A	7/171	0.339473	0.763196	0	0	1.23486	1.33409	MAP2K3;MAPK10;PRKCA;PIK3CB;ACTB;ACTG1;KPNA1
TGF-beta signaling pathway	4/90	0.34896	0.778839	0	0	1.34071	1.41149	SMAD3;SMURF2;SKP1;TGFBR2
Cell adhesion molecules (CAMs)	6/145	0.349433	0.774284	0	0	1.24824	1.31246	ITGB1;VCAN;ALCAM;ITGB2;CLDN16;PTPRF
Dilated cardiomyopathy (DCM)	4/91	0.356531	0.784368	0	0	1.32597	1.36752	ITGB1;ITGA3;ACTB;ACTG1
Fc gamma R-mediated phagocytosis	4/91	0.356531	0.778805	0	0	1.32597	1.36752	PRKCA;ASAP1;PIK3CB;ASAP2
IL-17 signaling pathway	4/93	0.371665	0.806147	0	0	1.29746	1.28417	MAPK10;USP25;IKBKG;ELAVL1
Acute myeloid leukemia	3/66	0.374943	0.807569	0	0	1.37118	1.3451	RARA;PIK3CB;IKBKG
Phagosome	6/152	0.390948	0.836195	0	0	1.19076	1.11834	ATP6V1A;ITGB1;ITGB2;CANX;ACTB;ACTG1
Amphetamine addiction	3/68	0.393011	0.83481	0	0	1.33085	1.2429	PRKCA;CALM2;CREB5
Cell cycle	5/124	0.393155	0.829395	0	0	1.21637	1.13554	STAG1;SMAD3;ABL1;MAD1L1;SKP1
Cushing syndrome	6/155	0.408749	0.856426	0	0	1.16771	1.0447	NCEH1;PLCB4;GNAQ;ITPR3;EGFR;CREB5
Osteoclast differentiation	5/127	0.412912	0.859304	0	0	1.18763	1.05049	MAPK10;SIRPA;PIK3CB;IKBKG;TGFBR2
Autophagy	5/128	0.419479	0.867111	0	0	1.17836	1.02369	MAPK10;IRS1;IRS2;TSC1;PIK3CB
Purine metabolism	5/129	0.426032	0.874787	0	0	1.16922	0.997626	GDA;PDE6A;NT5C2;FHIT;PDE9A
Calcium signaling pathway	7/188	0.431707	0.880567	0	0	1.1232	0.943497	PLCB4;GNAQ;PRKCA;ITPR3;CALM2;MCU;EGFR
Melanogenesis	4/101	0.431733	0.874828	0	0	1.19469	1.00348	PLCB4;GNAQ;PRKCA;CALM2
Nitrogen metabolism	1/17	0.436357	0.878419	0	0	1.77447	1.47155	CA12
ABC transporters	2/45	0.442363	0.884727	0	0	1.34071	1.09351	ABCC3;ABCC4
Inositol phosphate metabolism	3/74	0.446277	0.886795	0	0	1.22294	0.98669	INPP4A;PLCB4;PIK3CB
Toll-like receptor signaling pathway	4/104	0.453891	0.896144	0	0	1.16023	0.916461	MAP2K3;MAPK10;PIK3CB;IKBKG
Cysteine and methionine metabolism	2/47	0.464701	0.911644	0	0	1.28366	0.983743	CBS;SMS
Nucleotide excision repair	2/47	0.464701	0.905874	0	0	1.28366	0.983743	RFC1;POLE3
Pantothenate and CoA biosynthesis	1/19	0.473139	0.916521	0	0	1.58768	1.18817	PANK2
Notch signaling pathway	2/48	0.475671	0.915666	0	0	1.25691	0.933923	NCOR2;PSEN1
Cocaine addiction	2/49	0.486502	0.9307	0	0	1.23126	0.887141	BDNF;CREB5
Malaria	2/49	0.486502	0.924955	0	0	1.23126	0.887141	ITGB2;MET
Complement and coagulation cascades	3/79	0.489193	0.924364	0	0	1.14554	0.819061	ITGB2;PLAUR;TFPI
Cholesterol metabolism	2/50	0.497193	0.933753	0	0	1.20664	0.84317	LIPC;NCEH1
Amyotrophic lateral sclerosis (ALS)	2/51	0.507741	0.947783	0	0	1.18298	0.801803	MAP2K3;MAP3K5
Toxoplasmosis	4/113	0.518422	0.961891	0	0	1.06782	0.701521	MAP2K3;ITGB1;MAPK10;IKBKG
Terpenoid backbone biosynthesis	1/22	0.523866	0.966173	0	0	1.37118	0.886492	RCE1
Histidine metabolism	1/23	0.539668	0.989391	0	0	1.31156	0.808973	CARNMT1
Mannose type O-glycan biosynthesis	1/23	0.539668	0.983536	0	0	1.31156	0.808973	B4GALT1
Mismatch repair	1/23	0.539668	0.977751	0	0	1.31156	0.808973	RFC1
Protein export	1/23	0.539668	0.972033	0	0	1.31156	0.808973	SEC62
Renin-angiotensin system	1/23	0.539668	0.966382	0	0	1.31156	0.808973	THOP1
NOD-like receptor signaling pathway	6/178	0.541365	0.963818	0	0	1.01683	0.623988	MAPK10;PLCB4;ITPR3;RBCK1;IKBKG;MCU
Legionellosis	2/55	0.548458	0.970833	0	0	1.09694	0.658873	EEF1A1;ITGB2
Vitamin digestion and absorption	1/24	0.554945	0.976704	0	0	1.25691	0.740178	BTD
cAMP signaling pathway	7/212	0.557798	0.976147	0	0	0.996044	0.581449	MAPK10;ABCC4;PPP1R12A;BDNF;PIK3CB;CALM2;CREB5
GABAergic synapse	3/89	0.569719	0.991375	0	0	1.01683	0.572081	SLC38A1;GNG7;PRKCA
Endometrial cancer	2/58	0.577409	0.999112	0	0	1.0402	0.571285	PIK3CB;EGFR
Maturity onset diabetes of the young	1/26	0.583998	1	0	0	1.16023	0.624037	HNF1B
Kaposi sarcoma-associated herpesvirus infection	6/186	0.584495	1	0	0	0.973094	0.522558	MAPK10;GNG7;ITPR3;PIK3CB;IKBKG;CALM2
VEGF signaling pathway	2/59	0.586752	0.998452	0	0	1.02257	0.545187	PRKCA;PIK3CB
Hepatitis C	5/155	0.58744	0.99413	0	0	0.973094	0.517667	RXRA;PIK3CB;IKBKG;CLDN16;EGFR
Collecting duct acid secretion	1/27	0.597807	1	0	0	1.11726	0.574815	ATP6V1A
Fatty acid elongation	1/27	0.597807	1	0	0	1.11726	0.574815	HADHA
Glycerolipid metabolism	2/61	0.604978	1	0	0	0.989046	0.497059	LIPC;MGLL
Butanoate metabolism	1/28	0.611157	1	0	0	1.07735	0.53049	HADHA
Hematopoietic cell lineage	3/97	0.62819	1	0	0	0.932966	0.433747	ITGA3;IL3RA;CD9
Mucin type O-glycan biosynthesis	1/31	0.648612	1	0	0	0.973094	0.421272	GCNT1
T cell receptor signaling pathway	3/101	0.655294	1	0	0	0.896017	0.378721	PIK3CB;IKBKG;PAK2
Epstein-Barr virus infection	6/201	0.659314	1	0	0	0.900475	0.375097	NCOR2;MAP2K3;MAPK10;SIN3A;IKBKG;PIK3CB
Propanoate metabolism	1/32	0.660279	1	0	0	0.942685	0.391302	HADHA
Base excision repair	1/33	0.671559	1	0	0	0.914119	0.36396	POLE3
Prolactin signaling pathway	2/70	0.679432	1	0	0	0.861883	0.333116	MAPK10;PIK3CB
RIG-I-like receptor signaling pathway	2/70	0.679432	1	0	0	0.861883	0.333116	MAPK10;IKBKG
B cell receptor signaling pathway	2/71	0.686956	1	0	0	0.849744	0.319066	PIK3CB;IKBKG
Leishmaniasis	2/74	0.708661	1	0	0	0.815295	0.28077	ITGB1;ITGB2
Primary immunodeficiency	1/37	0.71306	1	0	0	0.815295	0.275725	IKBKG
Thyroid cancer	1/37	0.71306	1	0	0	0.815295	0.275725	RXRA
Alcoholism	5/180	0.716184	1	0	0	0.837942	0.27972	BDNF;GNG7;H2AFV;CALM2;CREB5
Breast cancer	4/147	0.722365	1	0	0	0.820841	0.266957	LRP5;PIK3CB;BRCA2;EGFR
Antigen processing and presentation	2/77	0.729094	1	0	0	0.78353	0.247559	HSPA4;CANX
Pyruvate metabolism	1/39	0.731803	1	0	0	0.773485	0.241516	ME3
Ferroptosis	1/40	0.740711	1	0	0	0.754148	0.226354	SLC7A11
Glycine, serine and threonine metabolism	1/40	0.740711	1	0	0	0.754148	0.226354	CBS
Bladder cancer	1/41	0.749324	1	0	0	0.735754	0.212327	EGFR
Tryptophan metabolism	1/42	0.75765	1	0	0	0.718236	0.199334	HADHA
Chemokine signaling pathway	5/190	0.758895	1	0	0	0.79384	0.219014	PLCB4;PARD3;GNG7;PIK3CB;IKBKG
Taste transduction	2/83	0.766321	1	0	0	0.726889	0.193464	SCNN1A;ITPR3
Carbohydrate digestion and absorption	1/44	0.773485	1	0	0	0.685589	0.176093	PIK3CB
Fatty acid degradation	1/44	0.773485	1	0	0	0.685589	0.176093	HADHA
Vasopressin-regulated water reabsorption	1/44	0.773485	1	0	0	0.685589	0.176093	CREB5
Lysosome	3/123	0.778838	1	0	0	0.735754	0.183904	AP3S1;LITAF;SUMF1
Necroptosis	4/162	0.789096	1	0	0	0.744837	0.176428	MAPK10;H2AFV;RBCK1;CHMP6
Hedgehog signaling pathway	1/47	0.795321	1	0	0	0.641828	0.146985	SMURF2
Sphingolipid metabolism	1/47	0.795321	1	0	0	0.641828	0.146985	SPTLC2
Viral carcinogenesis	5/201	0.800096	1	0	0	0.750396	0.167356	ACTN4;IKBKG;PIK3CB;MAD1L1;CREB5
Amino sugar and nucleotide sugar metabolism	1/48	0.802122	1	0	0	0.628457	0.138571	GALE
Intestinal immune network for IgA production	1/48	0.802122	1	0	0	0.628457	0.138571	PIGR
Valine, leucine and isoleucine degradation	1/48	0.802122	1	0	0	0.628457	0.138571	HADHA
Arginine and proline metabolism	1/49	0.808697	1	0	0	0.615631	0.130717	SMS
Morphine addiction	2/91	0.808986	1	0	0	0.662987	0.140535	GNG7;PRKCA
Rheumatoid arthritis	2/91	0.808986	1	0	0	0.662987	0.140535	ATP6V1A;ITGB2
Natural killer cell mediated cytotoxicity	3/131	0.813684	1	0	0	0.690822	0.142436	ITGB2;PRKCA;PIK3CB
Th1 and Th2 cell differentiation	2/92	0.813802	1	0	0	0.655781	0.135116	MAPK10;IKBKG
NF-kappa B signaling pathway	2/95	0.827603	1	0	0	0.635072	0.12017	ERC1;IKBKG
Measles	3/138	0.840251	1	0	0	0.655781	0.114142	MAPK10;PIK3CB;IKBKG
Tuberculosis	4/179	0.848526	1	0	0	0.674099	0.110724	HSPA9;MAPK10;ITGB2;CALM2
Ribosome biogenesis in eukaryotes	2/101	0.852473	1	0	0	0.597345	0.0953444	TCOF1;SNORD3A
Pyrimidine metabolism	1/57	0.854024	1	0	0	0.529227	0.0835099	NT5C2
Cytosolic DNA-sensing pathway	1/63	0.880829	1	0	0	0.478824	0.0607589	IKBKG
Ribosome	3/153	0.886347	1	0	0	0.591488	0.0713614	RPS14;RPL35;UBA52
Inflammatory bowel disease (IBD)	1/65	0.888623	1	0	0	0.464091	0.0548008	SMAD3
Mitophagy	1/65	0.888623	1	0	0	0.464091	0.0548008	MAPK10
Aminoacyl-tRNA biosynthesis	1/66	0.892327	1	0	0	0.457059	0.0520693	SARS
Retinol metabolism	1/67	0.895908	1	0	0	0.450238	0.0494888	ALDH1A2
Glycolysis / Gluconeogenesis	1/68	0.899371	1	0	0	0.443616	0.04705	GAPDH
Staphylococcus aureus infection	1/68	0.899371	1	0	0	0.443616	0.04705	ITGB2
JAK-STAT signaling pathway	3/162	0.907932	1	0	0	0.558628	0.0539552	IL3RA;PIK3CB;EGFR
Metabolism of xenobiotics by cytochrome P450	1/74	0.917858	1	0	0	0.407647	0.0349405	MGST3
PPAR signaling pathway	1/74	0.917858	1	0	0	0.407647	0.0349405	RXRA
Synaptic vesicle cycle	1/78	0.928257	1	0	0	0.386742	0.0287916	ATP6V1A
Chemical carcinogenesis	1/82	0.937342	1	0	0	0.367877	0.0238043	MGST3
Systemic lupus erythematosus	2/133	0.937808	1	0	0	0.453623	0.0291272	H2AFV;ACTN4
Signaling pathways regulating pluripotency of stem cells	2/139	0.947375	1	0	0	0.434042	0.0234645	SMAD3;PIK3CB
Protein digestion and absorption	1/90	0.952209	1	0	0	0.335177	0.0164138	KCNQ1
Drug metabolism	1/108	0.974028	1	0	0	0.279314	0.00735009	MGST3
Cytokine-cytokine receptor interaction	3/294	0.997079	1	0	0	0.307815	0.000900293	EDAR;IL3RA;TGFBR2
Herpes simplex virus 1 infection	5/492	0.999759	1	0	0	0.306564	7.40194e-05	ZNF282;ZNF205;TSC1;IKBKG;PIK3CB
Neuroactive ligand-receptor interaction	2/338	0.999866	1	0	0	0.178497	2.39037e-05	THRB;PARD3
Olfactory transduction	2/444	0.999992	1	0	0	0.135882	1.11465e-06	GNG7;CALM2

## Sheet: Reactome 2016
Term	Overlap	P-value	Adjusted P-value	Old P-value	Old Adjusted P-value	Odds Ratio	Combined Score	Genes
Signaling by Rho GTPases Homo sapiens R-HSA-194315	35/367	2.30556e-08	3.5275e-05	0	0	2.87686	50.5906	ITGB1;ITSN1;ARHGAP18;ARHGAP39;KLC1;KALRN;ARHGAP6;ACTB;SKA2;ACTG1;ARHGAP22;RHPN1;ABL1;FLNA;SRGAP3;PAK2;MYH10;SRGAP1;NDEL1;PPP1R12A;ARHGEF17;ARHGEF16;MYO9B;ARHGAP26;RANGAP1;BAIAP2;ARHGAP24;KTN1;TIAM2;CENPF;OBSCN;FMNL2;INCENP;DLC1;MAD1L1
Axon guidance Homo sapiens R-HSA-422475	41/515	2.28917e-07	0.000175122	0	0	2.40156	36.7196	ITGB1;NRP1;NRP2;IRS1;ITSN1;IRS2;ARHGAP39;RASAL2;SHB;KALRN;EGFR;ACTB;ACTG1;ALCAM;DUSP10;ABLIM2;ABLIM3;RPS6KA2;ABL1;ABL2;SRGAP3;EPHB2;SRGAP1;SPTAN1;PAK2;MYH10;SPTBN1;SPTBN2;SEMA6A;RDX;DAB2IP;ADAM10;EREG;IL3RA;NF1;AGRN;EZR;UBA52;MET;VCL;EPHA2
Rho GTPase cycle Homo sapiens R-HSA-194840	16/122	2.79842e-06	0.00142719	0	0	3.95619	50.5856	ARHGEF17;ITSN1;ARHGEF16;ARHGAP18;ARHGAP39;MYO9B;ARHGAP26;KALRN;ARHGAP6;ARHGAP24;TIAM2;ARHGAP22;OBSCN;DLC1;SRGAP3;SRGAP1
Nephrin interactions Homo sapiens R-HSA-373753	7/22	4.70614e-06	0.0018001	0	0	9.59824	117.738	KIRREL3;KIRREL;ACTN4;PIK3CB;SPTAN1;SPTBN1;CD2AP
Developmental Biology Homo sapiens R-HSA-1266738	49/786	1.78466e-05	0.00546105	0	0	1.88057	20.5616	ITGB1;NRP1;NRP2;IRS1;CHD9;ITSN1;IRS2;ARHGAP39;SHB;ACTB;ACTG1;ALCAM;MED13;SALL1;DUSP10;RPS6KA2;EPHB2;SPTAN1;SEMA6A;ADAM10;HNF1B;EREG;NCOR2;IL3RA;RARA;EZR;MET;UBA52;VCL;EPHA2;RASAL2;KALRN;EGFR;ABLIM2;RXRA;ABLIM3;ABL1;ABL2;SRGAP3;SRGAP1;PAK2;MYH10;SPTBN1;SPTBN2;SMAD3;RDX;DAB2IP;NF1;AGRN
Cell-Cell communication Homo sapiens R-HSA-1500931	15/131	2.98212e-05	0.0076044	0	0	3.45411	35.9929	KIRREL3;ITGB1;KIRREL;ACTN4;PIK3CB;CD2AP;CDH6;PARD3;SIRPA;FLNA;CLDN16;SPTAN1;SPTBN1;PLEC;LIMS1
L1CAM interactions Homo sapiens R-HSA-373760	12/96	7.82216e-05	0.017097	0	0	3.77074	35.656	ITGB1;NRP1;NRP2;ALCAM;RPS6KA2;RDX;EPHB2;EZR;SPTAN1;EGFR;SPTBN1;SPTBN2
Downregulation of SMAD2/3:SMAD4 transcriptional activity Homo sapiens R-HSA-2173795	6/23	8.08173e-05	0.0154563	0	0	7.86937	74.1556	NCOR2;SMAD3;SMURF2;NEDD4L;UBA52;RNF111
HDR through Homologous Recombination (HR) or Single Strand Annealing (SSA) Homo sapiens R-HSA-5693567	13/112	8.67377e-05	0.0147454	0	0	3.5014	32.7473	MUS81;RFC1;HUS1;BRCA2;RAD51B;PPP4R2;SUMO1;BRE;EME2;ABL1;CLSPN;WHSC1;UBA52
DNA Double-Strand Break Repair Homo sapiens R-HSA-5693532	15/145	9.70444e-05	0.0148478	0	0	3.12061	28.8355	MUS81;RFC1;EYA3;HUS1;BRCA2;BAZ1B;RAD51B;PPP4R2;SUMO1;BRE;EME2;ABL1;CLSPN;WHSC1;UBA52
Homology Directed Repair Homo sapiens R-HSA-5693538	13/118	0.000148171	0.0206092	0	0	3.32336	29.3026	MUS81;RFC1;HUS1;BRCA2;RAD51B;PPP4R2;SUMO1;BRE;EME2;ABL1;CLSPN;WHSC1;UBA52
Hemostasis Homo sapiens R-HSA-109582	34/552	0.000424189	0.0540841	0	0	1.85805	14.4283	ITGB1;LGALS3BP;APP;DOCK4;ITGB2;ITPR3;PIK3CB;SLC7A11;KLC1;TFPI;KIF15;GNA13;CAPZB;SIN3A;GNG7;ABL1;FLNA;SIRPA;FAM3C;ABCC4;PRKCH;ITGA3;PCDH7;PLAUR;PRKCA;ACTN4;RAD51B;GNAQ;IL3RA;CD9;KIF20A;MGLL;VCL;PDE9A
Signaling by Robo receptor Homo sapiens R-HSA-376176	6/32	0.00056284	0.0662419	0	0	5.65611	42.3219	ABL1;ABL2;ARHGAP39;SRGAP3;PAK2;SRGAP1
Signaling by VEGF Homo sapiens R-HSA-194138	23/328	0.000637818	0.0697044	0	0	2.11529	15.5632	NRP1;NRP2;IRS1;DAB2IP;PRKCA;IRS2;ITPR3;RASAL2;PIK3CB;SHB;BAIAP2;EGFR;EREG;DUSP10;IL3RA;NF1;TRIB3;UBA52;SPTAN1;PAK2;SPTBN1;VCL;SPTBN2
NRAGE signals death through JNK Homo sapiens R-HSA-193648	7/45	0.000646042	0.0658963	0	0	4.69248	34.4646	TIAM2;OBSCN;ARHGEF17;ITSN1;ARHGEF16;AATF;KALRN
Cell death signalling via NRAGE, NRIF and NADE Homo sapiens R-HSA-204998	8/61	0.000873692	0.0835468	0	0	3.95619	27.8626	TIAM2;OBSCN;ARHGEF17;ITSN1;ARHGEF16;AATF;UBA52;KALRN
RHO GTPase Effectors Homo sapiens R-HSA-195258	19/255	0.000899498	0.0809548	0	0	2.24766	15.7643	ITGB1;PPP1R12A;KLC1;RANGAP1;BAIAP2;ACTB;SKA2;KTN1;ACTG1;CENPF;FMNL2;INCENP;RHPN1;ABL1;FLNA;PAK2;MYH10;MAD1L1;NDEL1
Disease Homo sapiens R-HSA-1643685	40/725	0.00119769	0.101803	0	0	1.66433	11.1965	SPON1;IRS1;LRP5;NEDD4L;IRS2;PIK3CB;EGFR;THSD4;RPS14;MYO18A;RPL35;IKBKG;THSD7A;ADAMTS9;PAK2;KPNA1;SKP1;MAP2K3;SUPT16H;SMAD3;NCBP1;NCBP2;GAB1;ADAM10;NUP153;EEF2;RANGAP1;HSPG2;EREG;TGFBR2;NCOR2;VCAN;CANX;NMT1;CD9;AGRN;CHMP6;UBA52;MAMLD1;MMADHC
EPH-Ephrin signaling Homo sapiens R-HSA-2682334	10/95	0.00120076	0.0966924	0	0	3.17536	21.3537	ITSN1;ADAM10;SHB;EPHB2;KALRN;PAK2;MYH10;ACTB;ACTG1;EPHA2
Apoptotic execution phase Homo sapiens R-HSA-75153	7/51	0.00138867	0.106233	0	0	4.14042	27.2415	HMGB2;ACIN1;CLSPN;SPTAN1;PAK2;KPNA1;PLEC
Downregulation of TGF-beta receptor signaling Homo sapiens R-HSA-2173788	5/26	0.00145409	0.105941	0	0	5.80114	37.901	SMAD3;SMURF2;NEDD4L;UBA52;TGFBR2
Platelet activation, signaling and aggregation Homo sapiens R-HSA-76002	18/253	0.00202941	0.141136	0	0	2.14619	13.3064	LGALS3BP;APP;ABCC4;PRKCH;PCDH7;PRKCA;ITPR3;ACTN4;PIK3CB;GNA13;GNAQ;GNG7;IL3RA;FLNA;CD9;FAM3C;MGLL;VCL
Signalling by NGF Homo sapiens R-HSA-166520	27/450	0.00231996	0.154328	0	0	1.80995	10.9796	IRS1;ITSN1;IRS2;ITPR3;RASAL2;PIK3CB;AATF;KALRN;EGFR;DUSP10;RPS6KA2;SPTAN1;SPTBN1;SPTBN2;ARHGEF17;ARHGEF16;DAB2IP;GAB1;PRKCA;EREG;TIAM2;OBSCN;IL3RA;NF1;TRIB3;UBA52;VCL
VEGFA-VEGFR2 Pathway Homo sapiens R-HSA-4420097	21/320	0.00242282	0.154455	0	0	1.97964	11.923	IRS1;DAB2IP;PRKCA;IRS2;ITPR3;RASAL2;PIK3CB;SHB;BAIAP2;EGFR;EREG;DUSP10;IL3RA;NF1;TRIB3;UBA52;SPTAN1;PAK2;SPTBN1;VCL;SPTBN2
Inactivation of Cdc42 and Rac Homo sapiens R-HSA-428543	3/9	0.00262289	0.160521	0	0	10.0553	59.7635	ARHGAP39;SRGAP3;SRGAP1
Gastrin-CREB signalling pathway via PKC and MAPK Homo sapiens R-HSA-881907	26/432	0.00265718	0.156365	0	0	1.81554	10.767	APP;IRS1;IRS2;ITPR3;RASAL2;KALRN;EGFR;DUSP10;RGS3;RPS6KA2;GNG7;SPTAN1;SPTBN1;SPTBN2;PRKCH;ANXA1;DAB2IP;PRKCA;EREG;PLCB4;GNAQ;IL3RA;NF1;UBA52;MGLL;VCL
Signaling by TGF-beta Receptor Complex Homo sapiens R-HSA-170834	8/73	0.00282038	0.159821	0	0	3.30585	19.4083	NCOR2;SMAD3;SMURF2;PARD3;NEDD4L;UBA52;RNF111;TGFBR2
Recruitment and ATM-mediated phosphorylation of repair and signaling proteins at DNA double strand breaks Homo sapiens R-HSA-5693565	7/58	0.00295515	0.161478	0	0	3.64071	21.2043	SUMO1;BRE;EYA3;ABL1;WHSC1;BAZ1B;UBA52
IRS-mediated signalling Homo sapiens R-HSA-112399	19/284	0.00308734	0.162884	0	0	2.01814	11.6658	IRS1;GAB1;DAB2IP;PRKAG2;IRS2;TSC1;RASAL2;PIK3CB;EGFR;EREG;DUSP10;IL3RA;NF1;TRIB3;UBA52;SPTAN1;SPTBN1;VCL;SPTBN2
SUMOylation of DNA replication proteins Homo sapiens R-HSA-4615885	6/44	0.00313291	0.159778	0	0	4.11353	23.7178	TOP2A;SUMO1;INCENP;NUP153;TOP1;RANGAP1
Transcriptional activity of SMAD2/SMAD3:SMAD4 heterotrimer Homo sapiens R-HSA-2173793	6/44	0.00313291	0.154624	0	0	4.11353	23.7178	NCOR2;SMAD3;SMURF2;NEDD4L;UBA52;RNF111
DNA Repair Homo sapiens R-HSA-73894	19/285	0.00320864	0.153413	0	0	2.01106	11.5473	MUS81;UBE2B;RFC1;PNKP;EYA3;HUS1;BRCA2;BAZ1B;ACTB;RAD51B;PPP4R2;SUMO1;BRE;EME2;ABL1;CLSPN;WHSC1;UBA52;RNF111
DNA Double Strand Break Response Homo sapiens R-HSA-5693606	7/59	0.00325912	0.151105	0	0	3.57901	20.4945	SUMO1;BRE;EYA3;ABL1;WHSC1;BAZ1B;UBA52
G alpha (12/13) signalling events Homo sapiens R-HSA-416482	8/75	0.00334187	0.150384	0	0	3.2177	18.3448	TIAM2;GNA13;OBSCN;ARHGEF17;GNG7;ITSN1;ARHGEF16;KALRN
Insulin receptor signalling cascade Homo sapiens R-HSA-74751	19/287	0.00346318	0.15139	0	0	1.99705	11.3144	IRS1;GAB1;DAB2IP;PRKAG2;IRS2;TSC1;RASAL2;PIK3CB;EGFR;EREG;DUSP10;IL3RA;NF1;TRIB3;UBA52;SPTAN1;SPTBN1;VCL;SPTBN2
Response to elevated platelet cytosolic Ca2+ Homo sapiens R-HSA-76005	10/110	0.0035863	0.152418	0	0	2.74236	15.4412	LGALS3BP;APP;ABCC4;PCDH7;FLNA;CD9;PRKCA;FAM3C;ACTN4;VCL
Cleavage of Growing Transcript in the Termination Region Homo sapiens R-HSA-109688	7/60	0.00358636	0.148301	0	0	3.51936	19.8161	NCBP1;NCBP2;U2AF2;ZC3H11A;DHX38;THOC2;SNRPF
RNA Polymerase II Transcription Termination Homo sapiens R-HSA-73856	7/60	0.00358636	0.144398	0	0	3.51936	19.8161	NCBP1;NCBP2;U2AF2;ZC3H11A;DHX38;THOC2;SNRPF
Post-Elongation Processing of the Transcript Homo sapiens R-HSA-76044	7/60	0.00358636	0.140696	0	0	3.51936	19.8161	NCBP1;NCBP2;U2AF2;ZC3H11A;DHX38;THOC2;SNRPF
IGF1R signaling cascade Homo sapiens R-HSA-2428924	19/288	0.00359662	0.137571	0	0	1.99011	11.1999	IRS1;GAB1;DAB2IP;PRKAG2;IRS2;TSC1;RASAL2;PIK3CB;EGFR;EREG;DUSP10;IL3RA;NF1;TRIB3;UBA52;SPTAN1;SPTBN1;VCL;SPTBN2
Signaling by Type 1 Insulin-like Growth Factor 1 Receptor (IGF1R) Homo sapiens R-HSA-2404192	19/288	0.00359662	0.134215	0	0	1.99011	11.1999	IRS1;GAB1;DAB2IP;PRKAG2;IRS2;TSC1;RASAL2;PIK3CB;EGFR;EREG;DUSP10;IL3RA;NF1;TRIB3;UBA52;SPTAN1;SPTBN1;VCL;SPTBN2
IRS-related events triggered by IGF1R Homo sapiens R-HSA-2428928	19/288	0.00359662	0.13102	0	0	1.99011	11.1999	IRS1;GAB1;DAB2IP;PRKAG2;IRS2;TSC1;RASAL2;PIK3CB;EGFR;EREG;DUSP10;IL3RA;NF1;TRIB3;UBA52;SPTAN1;SPTBN1;VCL;SPTBN2
SLBP independent Processing of Histone Pre-mRNAs Homo sapiens R-HSA-111367	3/10	0.00365518	0.130056	0	0	9.04977	50.7838	NCBP1;NCBP2;SNRPF
TGF-beta receptor signaling activates SMADs Homo sapiens R-HSA-2173789	5/32	0.00377975	0.131432	0	0	4.71342	26.2919	SMAD3;SMURF2;NEDD4L;UBA52;TGFBR2
Signaling by Insulin receptor Homo sapiens R-HSA-74752	20/311	0.00381414	0.129681	0	0	1.93993	10.8035	ATP6V1A;IRS1;GAB1;DAB2IP;PRKAG2;IRS2;TSC1;RASAL2;PIK3CB;EGFR;EREG;DUSP10;IL3RA;NF1;TRIB3;UBA52;SPTAN1;SPTBN1;VCL;SPTBN2
RHO GTPases activate PAKs Homo sapiens R-HSA-5627123	4/21	0.00456783	0.15193	0	0	5.74589	30.963	PPP1R12A;FLNA;PAK2;MYH10
RHO GTPases Activate Formins Homo sapiens R-HSA-5663220	10/114	0.00462921	0.150696	0	0	2.64613	14.2239	ITGB1;CENPF;FMNL2;INCENP;RANGAP1;ACTB;MAD1L1;ACTG1;SKA2;NDEL1
SLBP Dependent Processing of Replication-Dependent Histone Pre-mRNAs Homo sapiens R-HSA-77588	3/11	0.00490293	0.156281	0	0	8.22707	43.7509	NCBP1;NCBP2;SNRPF
HDR through Homologous Recombination (HRR) Homo sapiens R-HSA-5685942	7/64	0.0051507	0.160828	0	0	3.2994	17.3833	MUS81;RAD51B;RFC1;EME2;HUS1;BRCA2;UBA52
p75 NTR receptor-mediated signalling Homo sapiens R-HSA-193704	8/83	0.00621014	0.19003	0	0	2.90756	14.775	TIAM2;OBSCN;ARHGEF17;ITSN1;ARHGEF16;AATF;UBA52;KALRN
mRNA 3'-end processing Homo sapiens R-HSA-72187	6/51	0.00657859	0.197358	0	0	3.54893	17.8296	NCBP1;NCBP2;U2AF2;ZC3H11A;DHX38;THOC2
Post-Elongation Processing of Intron-Containing pre-mRNA Homo sapiens R-HSA-112296	6/51	0.00657859	0.193562	0	0	3.54893	17.8296	NCBP1;NCBP2;U2AF2;ZC3H11A;DHX38;THOC2
Fc epsilon receptor (FCERI) signaling Homo sapiens R-HSA-2454202	23/395	0.00671531	0.193857	0	0	1.7565	8.78839	IRS1;DAB2IP;GAB1;IRS2;ITPR3;RASAL2;PIK3CB;EGFR;EREG;MAPK10;DUSP10;CDC34;IL3RA;NF1;TRIB3;IKBKG;UBA52;SPTAN1;PAK2;SPTBN1;VCL;SKP1;SPTBN2
Transport of Mature mRNA derived from an Intron-Containing Transcript Homo sapiens R-HSA-159236	7/68	0.00717885	0.203401	0	0	3.10531	15.3297	NCBP1;NCBP2;U2AF2;ZC3H11A;DHX38;NUP153;THOC2
Signal Transduction Homo sapiens R-HSA-162582	103/2465	0.0075167	0.209101	0	0	1.26048	6.16455	APP;IRS1;ITSN1;IRS2;ARHGAP39;ACTB;ACTG1;RGS3;RPS6KA2;RNF111;SKP1;PRKCH;ADAM10;PRKCA;TSC1;HSPG2;EREG;TIAM2;OBSCN;PARD3;ROR1;TRIB3;RBCK1;UBA52;MAD1L1;VCL;ATP6V1A;NEDD4L;ARHGAP18;ITPR3;RASAL2;KLC1;KALRN;SKA2;ARHGAP22;PDGFC;RHPN1;ABL1;SRGAP3;SRGAP1;MYH10;SPTBN1;SPTBN2;SMAD3;SMURF2;ARHGAP26;ARHGAP24;GNAQ;NMT1;NF1;AMOTL1;ITGB1;NRP1;NRP2;B4GALT1;PRKAG2;PIK3CB;SHB;AATF;ARHGAP6;DUSP10;IKBKG;SPTAN1;NDEL1;A…
Signaling by EGFR Homo sapiens R-HSA-177929	21/355	0.00787171	0.215066	0	0	1.78446	8.64479	IRS1;GAB1;DAB2IP;ADAM10;PRKCA;IRS2;ITPR3;RASAL2;PIK3CB;EGFR;EPN1;EREG;DUSP10;IL3RA;NF1;TRIB3;UBA52;SPTAN1;SPTBN1;VCL;SPTBN2
Mitotic Telophase/Cytokinesis Homo sapiens R-HSA-68884	3/13	0.0080888	0.21712	0	0	6.96136	33.5348	STAG1;NIPBL;KIF20A
Platelet degranulation Homo sapiens R-HSA-114608	9/105	0.00816727	0.215447	0	0	2.58565	12.4308	LGALS3BP;APP;ABCC4;PCDH7;FLNA;CD9;FAM3C;ACTN4;VCL
VEGFR2 mediated cell proliferation Homo sapiens R-HSA-5218921	16/248	0.00881268	0.228532	0	0	1.94619	9.20851	IRS1;DAB2IP;PRKCA;IRS2;ITPR3;RASAL2;EGFR;EREG;DUSP10;IL3RA;NF1;UBA52;SPTAN1;SPTBN1;VCL;SPTBN2
Signaling by FGFR2 Homo sapiens R-HSA-5654738	21/361	0.00941918	0.240189	0	0	1.7548	8.18617	NCBP1;IRS1;NCBP2;GAB1;DAB2IP;PRKCA;IRS2;ITPR3;RASAL2;PIK3CB;EGFR;EREG;DUSP10;IL3RA;NF1;TRIB3;UBA52;SPTAN1;SPTBN1;VCL;SPTBN2
TRAF6 Mediated Induction of proinflammatory cytokines Homo sapiens R-HSA-168180	7/72	0.00974538	0.244433	0	0	2.9328	13.5817	MAP2K3;MAPK10;APP;RPS6KA2;IKBKG;UBA52;SKP1
PKMTs methylate histone lysines Homo sapiens R-HSA-3214841	5/40	0.0099443	0.2454	0	0	3.77074	17.386	ATF7IP;SETD2;NSD1;SETD1A;WHSC1
SUMO is conjugated to E1 (UBA2:SAE1) Homo sapiens R-HSA-3065676	2/5	0.0102655	0.249305	0	0	12.0664	55.2515	SUMO1;SAE1
IRS activation Homo sapiens R-HSA-74713	2/5	0.0102655	0.245409	0	0	12.0664	55.2515	IRS1;IRS2
Signaling by FGFR Homo sapiens R-HSA-190236	21/366	0.0108888	0.256305	0	0	1.73083	7.8234	NCBP1;IRS1;NCBP2;GAB1;DAB2IP;PRKCA;IRS2;ITPR3;RASAL2;PIK3CB;EGFR;EREG;DUSP10;IL3RA;NF1;TRIB3;UBA52;SPTAN1;SPTBN1;VCL;SPTBN2
Transport of Mature Transcript to Cytoplasm Homo sapiens R-HSA-72202	7/74	0.0112538	0.260883	0	0	2.85353	12.804	NCBP1;NCBP2;U2AF2;ZC3H11A;DHX38;NUP153;THOC2
Non-integrin membrane-ECM interactions Homo sapiens R-HSA-3000171	5/42	0.0121811	0.278167	0	0	3.59118	15.8294	ITGB1;TNC;PRKCA;AGRN;HSPG2
EPHB-mediated forward signaling Homo sapiens R-HSA-3928662	5/42	0.0121811	0.274076	0	0	3.59118	15.8294	ITSN1;EPHB2;KALRN;ACTB;ACTG1
Downstream signaling of activated FGFR2 Homo sapiens R-HSA-5654696	19/329	0.0140412	0.311349	0	0	1.7421	7.4314	IRS1;GAB1;DAB2IP;PRKCA;IRS2;ITPR3;RASAL2;PIK3CB;EGFR;EREG;DUSP10;IL3RA;NF1;TRIB3;UBA52;SPTAN1;SPTBN1;VCL;SPTBN2
Downstream signaling of activated FGFR4 Homo sapiens R-HSA-5654716	19/329	0.0140412	0.306901	0	0	1.7421	7.4314	IRS1;GAB1;DAB2IP;PRKCA;IRS2;ITPR3;RASAL2;PIK3CB;EGFR;EREG;DUSP10;IL3RA;NF1;TRIB3;UBA52;SPTAN1;SPTBN1;VCL;SPTBN2
Downstream signaling of activated FGFR3 Homo sapiens R-HSA-5654708	19/329	0.0140412	0.302578	0	0	1.7421	7.4314	IRS1;GAB1;DAB2IP;PRKCA;IRS2;ITPR3;RASAL2;PIK3CB;EGFR;EREG;DUSP10;IL3RA;NF1;TRIB3;UBA52;SPTAN1;SPTBN1;VCL;SPTBN2
Cell Cycle Homo sapiens R-HSA-1640170	29/566	0.0140572	0.298716	0	0	1.5456	6.59141	TOP2A;DIDO1;BRCA2;SKA2;SYNE1;NIPBL;SUMO1;CLSPN;WHSC1;CDK5RAP2;SKP1;NDEL1;PPP1R12A;RFC1;NEK6;CEP131;DYRK1A;HUS1;PRKCA;NUP153;RANGAP1;TUBG1;CENPF;STAG1;BRE;INCENP;KIF20A;UBA52;MAD1L1
MAP kinase activation in TLR cascade Homo sapiens R-HSA-450294	6/60	0.0142588	0.298849	0	0	3.01659	12.8217	MAP2K3;MAPK10;RPS6KA2;IKBKG;UBA52;SKP1
Signaling by ERBB4 Homo sapiens R-HSA-1236394	19/330	0.0144554	0.298874	0	0	1.73683	7.35839	IRS1;GAB1;DAB2IP;IRS2;RASAL2;PIK3CB;EGFR;EREG;ITCH;DUSP10;IL3RA;NF1;TRIB3;UBA52;SPTAN1;SPTBN1;VCL;SKP1;SPTBN2
PI3K events in ERBB2 signaling Homo sapiens R-HSA-1963642	3/16	0.0147119	0.300123	0	0	5.65611	23.8637	GAB1;EGFR;EREG
MAP3K8 (TPL2)-dependent MAPK1/3 activation Homo sapiens R-HSA-5684264	3/16	0.0147119	0.296174	0	0	5.65611	23.8637	IKBKG;UBA52;SKP1
Cell-extracellular matrix interactions Homo sapiens R-HSA-446353	3/16	0.0147119	0.292327	0	0	5.65611	23.8637	ITGB1;FLNA;LIMS1
TGF-beta receptor signaling in EMT (epithelial to mesenchymal transition) Homo sapiens R-HSA-2173791	3/16	0.0147119	0.28858	0	0	5.65611	23.8637	PARD3;UBA52;TGFBR2
SUMO is transferred from E1 to E2 (UBE2I, UBC9) Homo sapiens R-HSA-3065678	2/6	0.0150618	0.291703	0	0	10.0553	42.188	SUMO1;SAE1
SMAD2/3 Phosphorylation Motif Mutants in Cancer Homo sapiens R-HSA-3304356	2/6	0.0150618	0.288057	0	0	10.0553	42.188	SMAD3;TGFBR2
Uptake and function of diphtheria toxin Homo sapiens R-HSA-5336415	2/6	0.0150618	0.2845	0	0	10.0553	42.188	CD9;EEF2
Signaling by FGFR4 Homo sapiens R-HSA-5654743	19/332	0.0153125	0.285708	0	0	1.72636	7.21462	IRS1;GAB1;DAB2IP;PRKCA;IRS2;ITPR3;RASAL2;PIK3CB;EGFR;EREG;DUSP10;IL3RA;NF1;TRIB3;UBA52;SPTAN1;SPTBN1;VCL;SPTBN2
Downstream signaling of activated FGFR1 Homo sapiens R-HSA-5654687	19/332	0.0153125	0.282266	0	0	1.72636	7.21462	IRS1;GAB1;DAB2IP;PRKCA;IRS2;ITPR3;RASAL2;PIK3CB;EGFR;EREG;DUSP10;IL3RA;NF1;TRIB3;UBA52;SPTAN1;SPTBN1;VCL;SPTBN2
Constitutive Signaling by Aberrant PI3K in Cancer Homo sapiens R-HSA-2219530	6/61	0.0153847	0.280222	0	0	2.96714	12.386	IRS1;GAB1;IRS2;PIK3CB;EGFR;EREG
PI3K Cascade Homo sapiens R-HSA-109704	7/79	0.0157538	0.283568	0	0	2.67293	11.0945	IRS1;GAB1;PRKAG2;IRS2;TSC1;TRIB3;PIK3CB
Signaling by FGFR3 Homo sapiens R-HSA-5654741	19/333	0.0157557	0.280305	0	0	1.72118	7.14384	IRS1;GAB1;DAB2IP;PRKCA;IRS2;ITPR3;RASAL2;PIK3CB;EGFR;EREG;DUSP10;IL3RA;NF1;TRIB3;UBA52;SPTAN1;SPTBN1;VCL;SPTBN2
Diseases of signal transduction Homo sapiens R-HSA-5663202	17/288	0.0160537	0.282323	0	0	1.78063	7.35723	SMAD3;NCBP1;IRS1;NCBP2;GAB1;LRP5;ADAM10;IRS2;PIK3CB;EGFR;EREG;TGFBR2;NCOR2;MYO18A;UBA52;MAMLD1;SKP1
Interleukin receptor SHC signaling Homo sapiens R-HSA-912526	15/245	0.0169993	0.295557	0	0	1.84689	7.52531	IRS1;DAB2IP;IRS2;RASAL2;PIK3CB;EGFR;EREG;DUSP10;IL3RA;NF1;UBA52;SPTAN1;SPTBN1;VCL;SPTBN2
Signaling by FGFR1 Homo sapiens R-HSA-5654736	19/336	0.0171459	0.294755	0	0	1.70581	6.93582	IRS1;GAB1;DAB2IP;PRKCA;IRS2;ITPR3;RASAL2;PIK3CB;EGFR;EREG;DUSP10;IL3RA;NF1;TRIB3;UBA52;SPTAN1;SPTBN1;VCL;SPTBN2
Formation of Senescence-Associated Heterochromatin Foci (SAHF) Homo sapiens R-HSA-2559584	3/17	0.0174321	0.296346	0	0	5.3234	21.5568	UBN1;EP400;HMGA2
Chylomicron-mediated lipid transport Homo sapiens R-HSA-174800	3/17	0.0174321	0.293089	0	0	5.3234	21.5568	LIPC;P4HB;HSPG2
Circadian Clock Homo sapiens R-HSA-400253	6/63	0.0178183	0.296326	0	0	2.87294	11.5709	RAI1;RXRA;CHD9;NRIP1;UBA52;SKP1
Processing of DNA double-strand break ends Homo sapiens R-HSA-5693607	7/81	0.0178682	0.29396	0	0	2.60693	10.4922	PPP4R2;SUMO1;BRE;HUS1;WHSC1;CLSPN;UBA52
Cellular Senescence Homo sapiens R-HSA-2559583	11/161	0.0185584	0.302068	0	0	2.06103	8.21696	MAP2K3;MAPK10;MIR24-1;RPS6KA2;UBN1;ERF;EP400;HMGA2;TNIK;UBA52;MAP3K5
Chromatin organization Homo sapiens R-HSA-4839726	14/226	0.0188761	0.304005	0	0	1.86868	7.41841	MBD3;KDM5A;ATF7IP;SMARCC1;SETD2;SETD1A;JADE2;ACTB;NCOR2;MORF4L1;NSD1;EP400;WHSC1;OGT
Chromatin modifying enzymes Homo sapiens R-HSA-3247509	14/226	0.0188761	0.300839	0	0	1.86868	7.41841	MBD3;KDM5A;ATF7IP;SMARCC1;SETD2;SETD1A;JADE2;ACTB;NCOR2;MORF4L1;NSD1;EP400;WHSC1;OGT
Toll Like Receptor 10 (TLR10) Cascade Homo sapiens R-HSA-168142	7/82	0.0189969	0.299642	0	0	2.57514	10.2065	MAP2K3;MAPK10;APP;RPS6KA2;IKBKG;UBA52;SKP1
Toll Like Receptor 5 (TLR5) Cascade Homo sapiens R-HSA-168176	7/82	0.0189969	0.296584	0	0	2.57514	10.2065	MAP2K3;MAPK10;APP;RPS6KA2;IKBKG;UBA52;SKP1
MyD88 cascade initiated on plasma membrane Homo sapiens R-HSA-975871	7/82	0.0189969	0.293589	0	0	2.57514	10.2065	MAP2K3;MAPK10;APP;RPS6KA2;IKBKG;UBA52;SKP1
SUMOylation Homo sapiens R-HSA-2990846	8/101	0.0190488	0.291447	0	0	2.38938	9.46374	TOP2A;STAG1;SUMO1;INCENP;NUP153;TOP1;SAE1;RANGAP1
HIV Life Cycle Homo sapiens R-HSA-162587	10/141	0.0191403	0.289948	0	0	2.13943	8.46348	SUPT16H;NCBP1;NCBP2;NMT1;NEDD4L;NUP153;RANGAP1;CHMP6;UBA52;KPNA1
Signaling by PDGF Homo sapiens R-HSA-186797	20/364	0.0194637	0.291956	0	0	1.65747	6.5291	IRS1;GAB1;DAB2IP;PRKCA;IRS2;ITPR3;RASAL2;PIK3CB;EGFR;EREG;DUSP10;PDGFC;IL3RA;NF1;TRIB3;UBA52;SPTAN1;SPTBN1;VCL;SPTBN2
Downstream signal transduction Homo sapiens R-HSA-186763	19/341	0.0196732	0.292233	0	0	1.6808	6.60302	IRS1;GAB1;DAB2IP;PRKCA;IRS2;ITPR3;RASAL2;PIK3CB;EGFR;EREG;DUSP10;IL3RA;NF1;TRIB3;UBA52;SPTAN1;SPTBN1;VCL;SPTBN2
TRAF6 mediated induction of NFkB and MAP kinases upon TLR7/8 or 9 activation Homo sapiens R-HSA-975138	7/83	0.0201746	0.2968	0	0	2.54411	9.93051	MAP2K3;MAPK10;APP;RPS6KA2;IKBKG;UBA52;SKP1
Resolution of D-loop Structures through Holliday Junction Intermediates Homo sapiens R-HSA-5693568	4/32	0.0206123	0.300351	0	0	3.77074	14.6375	MUS81;RAD51B;EME2;BRCA2
Loss of Function of TGFBR1 in Cancer Homo sapiens R-HSA-3656534	2/7	0.0206271	0.29773	0	0	8.61883	33.451	SMAD3;TGFBR2
TGFBR1 KD Mutants in Cancer Homo sapiens R-HSA-3656532	2/7	0.0206271	0.294948	0	0	8.61883	33.451	SMAD3;TGFBR2
Loss of Function of SMAD2/3 in Cancer Homo sapiens R-HSA-3304349	2/7	0.0206271	0.292217	0	0	8.61883	33.451	SMAD3;TGFBR2
SMAD2/3 MH2 Domain Mutants in Cancer Homo sapiens R-HSA-3315487	2/7	0.0206271	0.289536	0	0	8.61883	33.451	SMAD3;TGFBR2
Cellular responses to stress Homo sapiens R-HSA-2262752	20/367	0.0210401	0.292649	0	0	1.64392	6.3477	MAP2K3;HSPA9;HSPA4;PRKAG2;HMGA2;TSC1;NUP153;CCAR2;MIR24-1;EEF1A1;MAPK10;RPS6KA2;UBN1;ERF;EP400;TNIK;P4HB;CHMP6;UBA52;MAP3K5
Interleukin-2 signaling Homo sapiens R-HSA-451927	15/252	0.0213196	0.293865	0	0	1.79559	6.90966	IRS1;DAB2IP;IRS2;RASAL2;PIK3CB;EGFR;EREG;DUSP10;IL3RA;NF1;UBA52;SPTAN1;SPTBN1;VCL;SPTBN2
DAP12 signaling Homo sapiens R-HSA-2424491	19/344	0.0213222	0.291276	0	0	1.66614	6.41132	IRS1;GAB1;DAB2IP;PRKCA;IRS2;ITPR3;RASAL2;PIK3CB;EGFR;EREG;DUSP10;IL3RA;NF1;TRIB3;UBA52;SPTAN1;SPTBN1;VCL;SPTBN2
MyD88 dependent cascade initiated on endosome Homo sapiens R-HSA-975155	7/85	0.0226809	0.307095	0	0	2.48425	9.40595	MAP2K3;MAPK10;APP;RPS6KA2;IKBKG;UBA52;SKP1
Toll Like Receptor 7/8 (TLR7/8) Cascade Homo sapiens R-HSA-168181	7/85	0.0226809	0.304402	0	0	2.48425	9.40595	MAP2K3;MAPK10;APP;RPS6KA2;IKBKG;UBA52;SKP1
Resolution of D-Loop Structures Homo sapiens R-HSA-5693537	4/33	0.0228574	0.304103	0	0	3.65647	13.8159	MUS81;RAD51B;EME2;BRCA2
Inactivation, recovery and regulation of the phototransduction cascade Homo sapiens R-HSA-2514859	4/33	0.0228574	0.301482	0	0	3.65647	13.8159	NMT1;PRKCA;PDE6A;METAP2
Integrin cell surface interactions Homo sapiens R-HSA-216083	6/67	0.0234503	0.306658	0	0	2.70143	10.1381	ITGB1;ITGA3;ITGB2;TNC;AGRN;HSPG2
Signaling by PTK6 Homo sapiens R-HSA-8848021	6/67	0.0234503	0.304059	0	0	2.70143	10.1381	DAB2IP;NF1;RASAL2;UBA52;EGFR;EREG
Semaphorin interactions Homo sapiens R-HSA-373755	6/67	0.0234503	0.301504	0	0	2.70143	10.1381	ITGB1;NRP1;SEMA6A;MET;PAK2;MYH10
Defective B3GALT6 causes EDSP2 and SEMDJL1 Homo sapiens R-HSA-4420332	3/19	0.0236561	0.301615	0	0	4.76304	17.8335	VCAN;AGRN;HSPG2
Defective B4GALT7 causes EDS, progeroid type Homo sapiens R-HSA-3560783	3/19	0.0236561	0.299122	0	0	4.76304	17.8335	VCAN;AGRN;HSPG2
Defective B3GAT3 causes JDSSDHD Homo sapiens R-HSA-3560801	3/19	0.0236561	0.29667	0	0	4.76304	17.8335	VCAN;AGRN;HSPG2
Constitutive Signaling by Ligand-Responsive EGFR Cancer Variants Homo sapiens R-HSA-1236382	3/19	0.0236561	0.294258	0	0	4.76304	17.8335	GAB1;UBA52;EGFR
Signaling by Ligand-Responsive EGFR Variants in Cancer Homo sapiens R-HSA-5637815	3/19	0.0236561	0.291885	0	0	4.76304	17.8335	GAB1;UBA52;EGFR
Signaling by EGFR in Cancer Homo sapiens R-HSA-1643713	3/19	0.0236561	0.28955	0	0	4.76304	17.8335	GAB1;UBA52;EGFR
Signaling by SCF-KIT Homo sapiens R-HSA-1433557	18/325	0.0239886	0.29129	0	0	1.67073	6.23211	IRS1;GAB1;DAB2IP;PRKCA;IRS2;RASAL2;PIK3CB;EGFR;EREG;DUSP10;IL3RA;NF1;TRIB3;UBA52;SPTAN1;SPTBN1;VCL;SPTBN2
Cell junction organization Homo sapiens R-HSA-446728	7/86	0.0240113	0.28927	0	0	2.45536	9.15663	ITGB1;CDH6;PARD3;FLNA;CLDN16;PLEC;LIMS1
NGF signalling via TRKA from the plasma membrane Homo sapiens R-HSA-187037	20/374	0.0251009	0.300034	0	0	1.61315	5.94422	IRS1;GAB1;DAB2IP;PRKCA;IRS2;ITPR3;RASAL2;PIK3CB;EGFR;EREG;DUSP10;RPS6KA2;IL3RA;NF1;TRIB3;UBA52;SPTAN1;SPTBN1;VCL;SPTBN2
The phototransduction cascade Homo sapiens R-HSA-2514856	4/34	0.0252456	0.299424	0	0	3.54893	13.0569	NMT1;PRKCA;PDE6A;METAP2
GRB2 events in EGFR signaling Homo sapiens R-HSA-179812	14/235	0.0253823	0.29873	0	0	1.79712	6.60208	IRS1;DAB2IP;IRS2;RASAL2;EGFR;EREG;DUSP10;IL3RA;NF1;UBA52;SPTAN1;SPTBN1;VCL;SPTBN2
SHC1 events in EGFR signaling Homo sapiens R-HSA-180336	14/235	0.0253823	0.29645	0	0	1.79712	6.60208	IRS1;DAB2IP;IRS2;RASAL2;EGFR;EREG;DUSP10;IL3RA;NF1;UBA52;SPTAN1;SPTBN1;VCL;SPTBN2
SOS-mediated signalling Homo sapiens R-HSA-112412	14/235	0.0253823	0.294204	0	0	1.79712	6.60208	IRS1;DAB2IP;IRS2;RASAL2;EGFR;EREG;DUSP10;IL3RA;NF1;UBA52;SPTAN1;SPTBN1;VCL;SPTBN2
SHC1 events in ERBB4 signaling Homo sapiens R-HSA-1250347	14/235	0.0253823	0.291992	0	0	1.79712	6.60208	IRS1;DAB2IP;IRS2;RASAL2;EGFR;EREG;DUSP10;IL3RA;NF1;UBA52;SPTAN1;SPTBN1;VCL;SPTBN2
RAF/MAP kinase cascade Homo sapiens R-HSA-5673001	14/235	0.0253823	0.289813	0	0	1.79712	6.60208	IRS1;DAB2IP;IRS2;RASAL2;EGFR;EREG;DUSP10;IL3RA;NF1;UBA52;SPTAN1;SPTBN1;VCL;SPTBN2
FRS-mediated FGFR2 signaling Homo sapiens R-HSA-5654700	14/236	0.0261966	0.296894	0	0	1.7895	6.5176	IRS1;DAB2IP;IRS2;RASAL2;EGFR;EREG;DUSP10;IL3RA;NF1;UBA52;SPTAN1;SPTBN1;VCL;SPTBN2
FRS-mediated FGFR4 signaling Homo sapiens R-HSA-5654712	14/236	0.0261966	0.294711	0	0	1.7895	6.5176	IRS1;DAB2IP;IRS2;RASAL2;EGFR;EREG;DUSP10;IL3RA;NF1;UBA52;SPTAN1;SPTBN1;VCL;SPTBN2
FRS-mediated FGFR3 signaling Homo sapiens R-HSA-5654706	14/236	0.0261966	0.29256	0	0	1.7895	6.5176	IRS1;DAB2IP;IRS2;RASAL2;EGFR;EREG;DUSP10;IL3RA;NF1;UBA52;SPTAN1;SPTBN1;VCL;SPTBN2
FRS-mediated FGFR1 signaling Homo sapiens R-HSA-5654693	14/236	0.0261966	0.29044	0	0	1.7895	6.5176	IRS1;DAB2IP;IRS2;RASAL2;EGFR;EREG;DUSP10;IL3RA;NF1;UBA52;SPTAN1;SPTBN1;VCL;SPTBN2
Late Phase of HIV Life Cycle Homo sapiens R-HSA-162599	9/128	0.0267534	0.294479	0	0	2.12104	7.68049	SUPT16H;NCBP1;NCBP2;NMT1;NEDD4L;NUP153;RANGAP1;CHMP6;UBA52
Diseases of glycosylation Homo sapiens R-HSA-3781865	7/88	0.0268308	0.293223	0	0	2.39956	8.6821	SPON1;VCAN;THSD7A;AGRN;ADAMTS9;HSPG2;THSD4
Toll Like Receptor 9 (TLR9) Cascade Homo sapiens R-HSA-168138	7/88	0.0268308	0.291143	0	0	2.39956	8.6821	MAP2K3;MAPK10;APP;RPS6KA2;IKBKG;UBA52;SKP1
HuR (ELAVL1) binds and stabilizes mRNA Homo sapiens R-HSA-450520	2/8	0.0269052	0.289895	0	0	7.54148	27.2657	PRKCA;ELAVL1
Downregulation of ERBB4 signaling Homo sapiens R-HSA-1253288	2/8	0.0269052	0.287867	0	0	7.54148	27.2657	ITCH;UBA52
Formyl peptide receptors bind formyl peptides and many other ligands Homo sapiens R-HSA-444473	2/8	0.0269052	0.285868	0	0	7.54148	27.2657	APP;ANXA1
Signaling by TGF-beta Receptor Complex in Cancer Homo sapiens R-HSA-3304351	2/8	0.0269052	0.283897	0	0	7.54148	27.2657	SMAD3;TGFBR2
Syndecan interactions Homo sapiens R-HSA-3000170	3/20	0.0271608	0.28463	0	0	4.52489	16.3167	ITGB1;TNC;PRKCA
Extracellular matrix organization Homo sapiens R-HSA-1474244	16/283	0.0271944	0.283043	0	0	1.70549	6.14787	ITGB1;ITGA3;ITGB2;TNC;ADAM10;PRKCA;LTBP2;PLOD1;PSEN1;HSPG2;CAPN15;VCAN;P4HB;AGRN;ADAMTS9;PLEC
MAPK family signaling cascades Homo sapiens R-HSA-5683057	16/284	0.0279717	0.289166	0	0	1.69949	6.07833	IRS1;DAB2IP;IRS2;RASAL2;KALRN;EGFR;EREG;DUSP10;IL3RA;NF1;UBA52;SPTAN1;PAK2;SPTBN1;VCL;SPTBN2
Interleukin-3, 5 and GM-CSF signaling Homo sapiens R-HSA-512988	15/261	0.0280345	0.287871	0	0	1.73367	6.1967	IRS1;DAB2IP;IRS2;RASAL2;PIK3CB;EGFR;EREG;DUSP10;IL3RA;NF1;UBA52;SPTAN1;SPTBN1;VCL;SPTBN2
ARMS-mediated activation Homo sapiens R-HSA-170984	14/239	0.0287553	0.293304	0	0	1.76704	6.27111	IRS1;DAB2IP;IRS2;RASAL2;EGFR;EREG;DUSP10;IL3RA;NF1;UBA52;SPTAN1;SPTBN1;VCL;SPTBN2
Signalling to p38 via RIT and RIN Homo sapiens R-HSA-187706	14/239	0.0287553	0.291362	0	0	1.76704	6.27111	IRS1;DAB2IP;IRS2;RASAL2;EGFR;EREG;DUSP10;IL3RA;NF1;UBA52;SPTAN1;SPTBN1;VCL;SPTBN2
Frs2-mediated activation Homo sapiens R-HSA-170968	14/240	0.0296477	0.298427	0	0	1.75968	6.1912	IRS1;DAB2IP;IRS2;RASAL2;EGFR;EREG;DUSP10;IL3RA;NF1;UBA52;SPTAN1;SPTBN1;VCL;SPTBN2
Negative regulation of the PI3K/AKT network Homo sapiens R-HSA-199418	7/90	0.0298677	0.298677	0	0	2.34624	8.23759	IRS1;GAB1;IRS2;TRIB3;PIK3CB;EGFR;EREG
RHO GTPases Activate WASPs and WAVEs Homo sapiens R-HSA-5663213	4/36	0.0304571	0.302593	0	0	3.35177	11.7025	ABL1;BAIAP2;ACTB;ACTG1
MAPK1/MAPK3 signaling Homo sapiens R-HSA-5684996	14/241	0.0305601	0.301658	0	0	1.75238	6.11239	IRS1;DAB2IP;IRS2;RASAL2;EGFR;EREG;DUSP10;IL3RA;NF1;UBA52;SPTAN1;SPTBN1;VCL;SPTBN2
Signal transduction by L1 Homo sapiens R-HSA-445144	3/21	0.0309263	0.303316	0	0	4.30942	14.9802	ITGB1;NRP1;EGFR
Regulation of FZD by ubiquitination Homo sapiens R-HSA-4641263	3/21	0.0309263	0.301384	0	0	4.30942	14.9802	LRP5;UBA52;LGR4
DAP12 interactions Homo sapiens R-HSA-2172127	19/359	0.0312078	0.302202	0	0	1.59652	5.53529	IRS1;GAB1;DAB2IP;PRKCA;IRS2;ITPR3;RASAL2;PIK3CB;EGFR;EREG;DUSP10;IL3RA;NF1;TRIB3;UBA52;SPTAN1;SPTBN1;VCL;SPTBN2
Prolonged ERK activation events Homo sapiens R-HSA-169893	14/242	0.031493	0.303046	0	0	1.74514	6.03466	IRS1;DAB2IP;IRS2;RASAL2;EGFR;EREG;DUSP10;IL3RA;NF1;UBA52;SPTAN1;SPTBN1;VCL;SPTBN2
Signaling by NOTCH1 Homo sapiens R-HSA-1980143	6/72	0.0320233	0.306223	0	0	2.51383	8.65081	NCOR2;ITCH;ADAM10;UBA52;MAMLD1;SKP1
FCERI mediated MAPK activation Homo sapiens R-HSA-2871796	16/289	0.0321081	0.305126	0	0	1.67009	5.74283	IRS1;DAB2IP;IRS2;RASAL2;EGFR;EREG;MAPK10;DUSP10;IL3RA;NF1;UBA52;SPTAN1;PAK2;SPTBN1;VCL;SPTBN2
NCAM signaling for neurite out-growth Homo sapiens R-HSA-375165	15/266	0.0323821	0.305831	0	0	1.70109	5.83498	IRS1;DAB2IP;IRS2;RASAL2;EGFR;EREG;DUSP10;IL3RA;NF1;AGRN;UBA52;SPTAN1;SPTBN1;VCL;SPTBN2
Signaling by Leptin Homo sapiens R-HSA-2586552	14/243	0.0324464	0.304558	0	0	1.73795	5.95799	IRS1;DAB2IP;IRS2;RASAL2;EGFR;EREG;DUSP10;IL3RA;NF1;UBA52;SPTAN1;SPTBN1;VCL;SPTBN2
MyD88:Mal cascade initiated on plasma membrane Homo sapiens R-HSA-166058	7/92	0.0331279	0.309059	0	0	2.29523	7.82073	MAP2K3;MAPK10;APP;RPS6KA2;IKBKG;UBA52;SKP1
Toll Like Receptor TLR1:TLR2 Cascade Homo sapiens R-HSA-168179	7/92	0.0331279	0.307186	0	0	2.29523	7.82073	MAP2K3;MAPK10;APP;RPS6KA2;IKBKG;UBA52;SKP1
Toll Like Receptor TLR6:TLR2 Cascade Homo sapiens R-HSA-168188	7/92	0.0331279	0.305336	0	0	2.29523	7.82073	MAP2K3;MAPK10;APP;RPS6KA2;IKBKG;UBA52;SKP1
Toll Like Receptor 2 (TLR2) Cascade Homo sapiens R-HSA-181438	7/92	0.0331279	0.303507	0	0	2.29523	7.82073	MAP2K3;MAPK10;APP;RPS6KA2;IKBKG;UBA52;SKP1
Defective B3GALTL causes Peters-plus syndrome (PpS) Homo sapiens R-HSA-5083635	4/37	0.033283	0.303113	0	0	3.26118	11.0968	SPON1;THSD7A;ADAMTS9;THSD4
Apoptotic cleavage of cellular proteins Homo sapiens R-HSA-111465	4/37	0.033283	0.301319	0	0	3.26118	11.0968	ACIN1;CLSPN;SPTAN1;PLEC
Cohesin Loading onto Chromatin Homo sapiens R-HSA-2470946	2/9	0.0338431	0.304588	0	0	6.70354	22.6983	STAG1;NIPBL
Processing and activation of SUMO Homo sapiens R-HSA-3215018	2/9	0.0338431	0.302806	0	0	6.70354	22.6983	SUMO1;SAE1
EGFR Transactivation by Gastrin Homo sapiens R-HSA-2179392	2/9	0.0338431	0.301046	0	0	6.70354	22.6983	PRKCA;EGFR
CHL1 interactions Homo sapiens R-HSA-447041	2/9	0.0338431	0.299306	0	0	6.70354	22.6983	ITGB1;NRP1
Role of Abl in Robo-Slit signaling Homo sapiens R-HSA-428890	2/9	0.0338431	0.297586	0	0	6.70354	22.6983	ABL1;ABL2
Signalling to RAS Homo sapiens R-HSA-167044	14/246	0.0354323	0.309779	0	0	1.71676	5.7342	IRS1;DAB2IP;IRS2;RASAL2;EGFR;EREG;DUSP10;IL3RA;NF1;UBA52;SPTAN1;SPTBN1;VCL;SPTBN2
O-glycosylation of TSR domain-containing proteins Homo sapiens R-HSA-5173214	4/38	0.0362566	0.315186	0	0	3.17536	10.5331	SPON1;THSD7A;ADAMTS9;THSD4
Epigenetic regulation of gene expression Homo sapiens R-HSA-212165	8/115	0.0375443	0.324535	0	0	2.0985	6.88776	MBD3;SAP30BP;SIN3A;UHRF1;UBTF;DEK;BAZ1B;ACTB
Regulation of lipid metabolism by Peroxisome proliferator-activated receptor alpha (PPARalpha) Homo sapiens R-HSA-400206	8/116	0.0392075	0.337009	0	0	2.08041	6.7382	TIAM2;NCOR2;MED13;RXRA;CHD9;SIN3A;TRIB3;TEAD1
Laminin interactions Homo sapiens R-HSA-3000157	3/23	0.0392313	0.335329	0	0	3.93468	12.7416	ITGB1;ITGA3;HSPG2
Thromboxane signalling through TP receptor Homo sapiens R-HSA-428930	3/23	0.0392313	0.333466	0	0	3.93468	12.7416	GNA13;GNAQ;GNG7
Constitutive Signaling by NOTCH1 HD+PEST Domain Mutants Homo sapiens R-HSA-2894862	5/57	0.0401551	0.339432	0	0	2.64613	8.50733	NCOR2;ADAM10;UBA52;MAMLD1;SKP1
Signaling by NOTCH1 in Cancer Homo sapiens R-HSA-2644603	5/57	0.0401551	0.337567	0	0	2.64613	8.50733	NCOR2;ADAM10;UBA52;MAMLD1;SKP1
Signaling by NOTCH1 PEST Domain Mutants in Cancer Homo sapiens R-HSA-2644602	5/57	0.0401551	0.335723	0	0	2.64613	8.50733	NCOR2;ADAM10;UBA52;MAMLD1;SKP1
Constitutive Signaling by NOTCH1 PEST Domain Mutants Homo sapiens R-HSA-2644606	5/57	0.0401551	0.333898	0	0	2.64613	8.50733	NCOR2;ADAM10;UBA52;MAMLD1;SKP1
Signaling by NOTCH1 HD+PEST Domain Mutants in Cancer Homo sapiens R-HSA-2894858	5/57	0.0401551	0.332093	0	0	2.64613	8.50733	NCOR2;ADAM10;UBA52;MAMLD1;SKP1
SUMO E3 ligases SUMOylate target proteins Homo sapiens R-HSA-3108232	7/96	0.0403401	0.33183	0	0	2.1996	7.06161	TOP2A;STAG1;SUMO1;INCENP;NUP153;TOP1;RANGAP1
Signal attenuation Homo sapiens R-HSA-74749	2/10	0.0413901	0.338646	0	0	6.03318	19.214	IRS1;IRS2
Acetylcholine regulates insulin secretion Homo sapiens R-HSA-399997	2/10	0.0413901	0.336845	0	0	6.03318	19.214	GNAQ;PRKCA
Purine catabolism Homo sapiens R-HSA-74259	2/10	0.0413901	0.335062	0	0	6.03318	19.214	GDA;NT5C2
MyD88-independent TLR3/TLR4 cascade Homo sapiens R-HSA-166166	7/97	0.0422908	0.340552	0	0	2.17692	6.88601	MAP2K3;MAPK10;APP;RPS6KA2;IKBKG;UBA52;SKP1
Toll Like Receptor 3 (TLR3) Cascade Homo sapiens R-HSA-168164	7/97	0.0422908	0.338769	0	0	2.17692	6.88601	MAP2K3;MAPK10;APP;RPS6KA2;IKBKG;UBA52;SKP1
TRIF-mediated TLR3/TLR4 signaling Homo sapiens R-HSA-937061	7/97	0.0422908	0.337005	0	0	2.17692	6.88601	MAP2K3;MAPK10;APP;RPS6KA2;IKBKG;UBA52;SKP1
Infectious disease Homo sapiens R-HSA-5663205	18/348	0.042586	0.337599	0	0	1.56031	4.92468	MAP2K3;SUPT16H;NCBP1;NCBP2;NEDD4L;NUP153;EEF2;RANGAP1;RPS14;CANX;NMT1;RPL35;CD9;CHMP6;UBA52;PAK2;SKP1;KPNA1
Signalling to ERKs Homo sapiens R-HSA-187687	14/253	0.0431599	0.340385	0	0	1.66926	5.24622	IRS1;DAB2IP;IRS2;RASAL2;EGFR;EREG;DUSP10;IL3RA;NF1;UBA52;SPTAN1;SPTBN1;VCL;SPTBN2
Post-Elongation Processing of Intronless pre-mRNA Homo sapiens R-HSA-112297	3/24	0.0437646	0.343384	0	0	3.77074	11.7984	NCBP1;NCBP2;SNRPF
Processing of Capped Intronless Pre-mRNA Homo sapiens R-HSA-75067	3/24	0.0437646	0.341632	0	0	3.77074	11.7984	NCBP1;NCBP2;SNRPF
Metabolism of water-soluble vitamins and cofactors Homo sapiens R-HSA-196849	7/98	0.0443015	0.344068	0	0	2.15471	6.71566	PANK2;BTD;MTHFD1L;MTHFD2L;SLC2A1;NMNAT2;MMADHC
Resolution of Sister Chromatid Cohesion Homo sapiens R-HSA-2500257	7/99	0.0463728	0.358335	0	0	2.13294	6.55036	STAG1;CENPF;INCENP;RANGAP1;MAD1L1;SKA2;NDEL1
Budding and maturation of HIV virion Homo sapiens R-HSA-162588	3/25	0.0485467	0.373249	0	0	3.61991	10.9511	NEDD4L;CHMP6;UBA52
Basigin interactions Homo sapiens R-HSA-210991	3/25	0.0485467	0.371382	0	0	3.61991	10.9511	ITGB1;ITGA3;SLC7A11
Import of palmitoyl-CoA into the mitochondrial matrix Homo sapiens R-HSA-200425	2/11	0.0494983	0.376778	0	0	5.48471	16.486	RXRA;PRKAG2
RHO GTPases activate KTN1 Homo sapiens R-HSA-5625970	2/11	0.0494983	0.374913	0	0	5.48471	16.486	KLC1;KTN1
Toll Like Receptor 4 (TLR4) Cascade Homo sapiens R-HSA-166016	8/122	0.0502203	0.378508	0	0	1.97809	5.91714	MAP2K3;MAPK10;APP;RPS6KA2;ITGB2;IKBKG;UBA52;SKP1
Diseases associated with glycosaminoglycan metabolism Homo sapiens R-HSA-3560782	3/26	0.0535729	0.401797	0	0	3.48068	10.187	VCAN;AGRN;HSPG2
A tetrasaccharide linker sequence is required for GAG synthesis Homo sapiens R-HSA-1971475	3/26	0.0535729	0.399837	0	0	3.48068	10.187	VCAN;AGRN;HSPG2
Recycling pathway of L1 Homo sapiens R-HSA-437239	3/26	0.0535729	0.397896	0	0	3.48068	10.187	RPS6KA2;RDX;EZR
N-glycan antennae elongation in the medial/trans-Golgi Homo sapiens R-HSA-975576	3/26	0.0535729	0.395973	0	0	3.48068	10.187	FUT8;B4GALT1;MGAT5
PTK6 Regulates RHO GTPases, RAS GTPase and MAP kinases Homo sapiens R-HSA-8849471	3/26	0.0535729	0.39407	0	0	3.48068	10.187	DAB2IP;NF1;RASAL2
RNA Polymerase II Transcription Homo sapiens R-HSA-73857	8/124	0.0542939	0.397463	0	0	1.94619	5.66991	SUPT16H;NCBP1;NCBP2;U2AF2;ZC3H11A;DHX38;THOC2;SNRPF
Processing of Capped Intron-Containing Pre-mRNA Homo sapiens R-HSA-72203	11/193	0.057214	0.416845	0	0	1.7193	4.91885	NCBP1;NCBP2;U2AF2;ZC3H11A;DDX23;DHX38;NUP153;THOC2;SNRPF;ELAVL1;CCAR1
PI5P, PP2A and IER3 Regulate PI3K/AKT Signaling Homo sapiens R-HSA-6811558	6/83	0.0573922	0.416161	0	0	2.18067	6.23202	IRS1;GAB1;IRS2;PIK3CB;EGFR;EREG
Defective EXT2 causes exostoses 2 Homo sapiens R-HSA-3656237	2/12	0.0581225	0.419469	0	0	5.02765	14.3047	AGRN;HSPG2
Defective EXT1 causes exostoses 1, TRPS2 and CHDS Homo sapiens R-HSA-3656253	2/12	0.0581225	0.4175	0	0	5.02765	14.3047	AGRN;HSPG2
Caspase-mediated cleavage of cytoskeletal proteins Homo sapiens R-HSA-264870	2/12	0.0581225	0.415549	0	0	5.02765	14.3047	SPTAN1;PLEC
Metabolism of vitamins and cofactors Homo sapiens R-HSA-196854	9/148	0.0582448	0.414486	0	0	1.83441	5.21542	PANK2;BTD;MTHFD1L;MTHFD2L;SLC2A1;NMNAT2;AGRN;HSPG2;MMADHC
Uptake and actions of bacterial toxins Homo sapiens R-HSA-5339562	3/27	0.058838	0.416769	0	0	3.35177	9.49545	MAP2K3;CD9;EEF2
EGFR downregulation Homo sapiens R-HSA-182971	3/27	0.058838	0.414849	0	0	3.35177	9.49545	UBA52;EGFR;EPN1
Effects of PIP2 hydrolysis Homo sapiens R-HSA-114508	3/27	0.058838	0.412946	0	0	3.35177	9.49545	PRKCH;ITPR3;MGLL
RORA activates gene expression Homo sapiens R-HSA-1368082	3/27	0.058838	0.41106	0	0	3.35177	9.49545	RXRA;CHD9;NRIP1
Signaling by ERBB2 Homo sapiens R-HSA-1227986	4/45	0.061218	0.425743	0	0	2.68141	7.49003	GAB1;UBA52;EGFR;EREG
Recognition of DNA damage by PCNA-containing replication complex Homo sapiens R-HSA-110314	3/28	0.0643364	0.445406	0	0	3.23206	8.86758	RFC1;UBE2B;UBA52
Mitotic Prometaphase Homo sapiens R-HSA-68877	7/107	0.0651636	0.449101	0	0	1.97347	5.38926	STAG1;CENPF;INCENP;RANGAP1;MAD1L1;SKA2;NDEL1
PI3K/AKT Signaling in Cancer Homo sapiens R-HSA-2219528	6/86	0.0659319	0.452358	0	0	2.1046	5.72268	IRS1;GAB1;IRS2;PIK3CB;EGFR;EREG
Post-translational protein modification Homo sapiens R-HSA-597592	24/521	0.0664178	0.453657	0	0	1.3896	3.76831	TOP2A;SPON1;B4GALT1;GCNT1;PLAUR;NUP153;EEF2;RANGAP1;THSD4;SUMF1;STAG1;FUT8;SUMO1;INCENP;MGAT5;CANX;TOP1;THSD7A;SAE1;ADAMTS9;SPTAN1;ST6GALNAC5;SPTBN1;SPTBN2
HIV Infection Homo sapiens R-HSA-162906	12/222	0.0668364	0.454487	0	0	1.63059	4.41157	SUPT16H;NCBP1;NCBP2;NMT1;NEDD4L;NUP153;RANGAP1;CHMP6;UBA52;PAK2;SKP1;KPNA1
Activation of DNA fragmentation factor Homo sapiens R-HSA-211227	2/13	0.0672195	0.45507	0	0	4.64091	12.5295	HMGB2;KPNA1
Apoptosis induced DNA fragmentation Homo sapiens R-HSA-140342	2/13	0.0672195	0.453066	0	0	4.64091	12.5295	HMGB2;KPNA1
ERBB2 Activates PTK6 Signaling Homo sapiens R-HSA-8847993	2/13	0.0672195	0.451078	0	0	4.64091	12.5295	EGFR;EREG
Regulation of PLK1 Activity at G2/M Transition Homo sapiens R-HSA-2565942	6/87	0.0689346	0.460568	0	0	2.08041	5.56425	PPP1R12A;CEP131;TUBG1;UBA52;CDK5RAP2;SKP1
NOTCH1 Intracellular Domain Regulates Transcription Homo sapiens R-HSA-2122947	4/47	0.0696639	0.463416	0	0	2.56731	6.83951	NCOR2;UBA52;MAMLD1;SKP1
Interaction between L1 and Ankyrins Homo sapiens R-HSA-445095	3/29	0.0700621	0.464048	0	0	3.12061	8.29575	SPTAN1;SPTBN1;SPTBN2
YAP1- and WWTR1 (TAZ)-stimulated gene expression Homo sapiens R-HSA-2032785	3/29	0.0700621	0.462047	0	0	3.12061	8.29575	RXRA;CHD9;TEAD1
Activated NOTCH1 Transmits Signal to the Nucleus Homo sapiens R-HSA-2122948	3/30	0.0760087	0.499113	0	0	3.01659	7.77348	ITCH;ADAM10;UBA52
Receptor-ligand binding initiates the second proteolytic cleavage of Notch receptor Homo sapiens R-HSA-156988	2/14	0.0767487	0.501819	0	0	4.30942	11.0632	ADAM10;UBA52
DCC mediated attractive signaling Homo sapiens R-HSA-418885	2/14	0.0767487	0.499683	0	0	4.30942	11.0632	ABLIM2;ABLIM3
mRNA Splicing - Major Pathway Homo sapiens R-HSA-72163	8/134	0.0777727	0.504204	0	0	1.80095	4.59956	NCBP1;NCBP2;U2AF2;DDX23;DHX38;SNRPF;ELAVL1;CCAR1
Activated TLR4 signalling Homo sapiens R-HSA-166054	7/112	0.0789419	0.509625	0	0	1.88537	4.78703	MAP2K3;MAPK10;APP;RPS6KA2;IKBKG;UBA52;SKP1
Oxidative Stress Induced Senescence Homo sapiens R-HSA-2559580	6/91	0.0817236	0.525366	0	0	1.98896	4.98118	MAP2K3;MAPK10;MIR24-1;TNIK;UBA52;MAP3K5
HS-GAG biosynthesis Homo sapiens R-HSA-2022928	3/31	0.0821694	0.526022	0	0	2.91928	7.2952	EXT1;AGRN;HSPG2
Regulation of TNFR1 signaling Homo sapiens R-HSA-5357905	3/31	0.0821694	0.52383	0	0	2.91928	7.2952	IKBKG;RBCK1;UBA52
Metabolism of non-coding RNA Homo sapiens R-HSA-194441	4/50	0.0833873	0.529388	0	0	2.41327	5.99519	NCBP1;NCBP2;NUP153;SNRPF
snRNP Assembly Homo sapiens R-HSA-191859	4/50	0.0833873	0.527201	0	0	2.41327	5.99519	NCBP1;NCBP2;NUP153;SNRPF
Lipid digestion, mobilization, and transport Homo sapiens R-HSA-73923	5/71	0.086395	0.543969	0	0	2.12436	5.20219	LIPC;NCEH1;P4HB;HSPG2;MGLL
N-Glycan antennae elongation Homo sapiens R-HSA-975577	2/15	0.0866716	0.543473	0	0	4.02212	9.83662	B4GALT1;MGAT5
Processing of Intronless Pre-mRNAs Homo sapiens R-HSA-77595	2/15	0.0866716	0.541255	0	0	4.02212	9.83662	NCBP1;NCBP2
Constitutive Signaling by NOTCH1 HD Domain Mutants Homo sapiens R-HSA-2691232	2/15	0.0866716	0.539055	0	0	4.02212	9.83662	ADAM10;UBA52
Signaling by NOTCH1 HD Domain Mutants in Cancer Homo sapiens R-HSA-2691230	2/15	0.0866716	0.536872	0	0	4.02212	9.83662	ADAM10;UBA52
ERBB2 Regulates Cell Motility Homo sapiens R-HSA-6785631	2/15	0.0866716	0.534708	0	0	4.02212	9.83662	EGFR;EREG
Signaling by EGFRvIII in Cancer Homo sapiens R-HSA-5637812	2/15	0.0866716	0.53256	0	0	4.02212	9.83662	GAB1;EGFR
Constitutive Signaling by EGFRvIII Homo sapiens R-HSA-5637810	2/15	0.0866716	0.53043	0	0	4.02212	9.83662	GAB1;EGFR
Recycling of bile acids and salts Homo sapiens R-HSA-159418	2/15	0.0866716	0.528317	0	0	4.02212	9.83662	ABCC3;RXRA
Nuclear Receptor transcription pathway Homo sapiens R-HSA-383280	4/51	0.0882351	0.535713	0	0	2.36595	5.74395	THRB;RXRA;RARA;NR2F6
Signaling by NOTCH2 Homo sapiens R-HSA-1980145	3/32	0.0885374	0.535424	0	0	2.82805	6.85614	ADAM10;UBA52;MAMLD1
Oncogene Induced Senescence Homo sapiens R-HSA-2559585	3/32	0.0885374	0.533316	0	0	2.82805	6.85614	MIR24-1;ERF;UBA52
SMAD2/SMAD3:SMAD4 heterotrimer regulates transcription Homo sapiens R-HSA-2173796	3/32	0.0885374	0.531225	0	0	2.82805	6.85614	SMAD3;UBA52;RNF111
Signal amplification Homo sapiens R-HSA-392518	3/32	0.0885374	0.529149	0	0	2.82805	6.85614	GNA13;GNG7;GNAQ
Thrombin signalling through proteinase activated receptors (PARs) Homo sapiens R-HSA-456926	3/32	0.0885374	0.527091	0	0	2.82805	6.85614	GNA13;GNG7;GNAQ
Cell Cycle, Mitotic Homo sapiens R-HSA-69278	21/462	0.0906909	0.537818	0	0	1.37118	3.29124	TOP2A;PPP1R12A;RFC1;NEK6;CEP131;DYRK1A;PRKCA;NUP153;RANGAP1;TUBG1;SKA2;NIPBL;CENPF;STAG1;INCENP;KIF20A;UBA52;MAD1L1;CDK5RAP2;SKP1;NDEL1
Innate Immune System Homo sapiens R-HSA-168249	34/807	0.0910581	0.537911	0	0	1.27093	3.04548	APP;IRS1;ITGB2;IRS2;ITPR3;RASAL2;PIK3CB;EGFR;ACTB;ACTG1;DUSP10;RPS6KA2;ABL1;IKBKG;SPTAN1;PAK2;SPTBN1;SKP1;SPTBN2;MAP2K3;DAB2IP;GAB1;PRKCA;MYO9B;BAIAP2;EREG;MAPK10;ITCH;CDC34;IL3RA;NF1;TRIB3;UBA52;VCL
Apoptosis Homo sapiens R-HSA-109581	9/163	0.0932081	0.548494	0	0	1.6656	3.95234	NMT1;HMGB2;ACIN1;CLSPN;UBA52;SPTAN1;PAK2;KPNA1;PLEC
mRNA Splicing - Minor Pathway Homo sapiens R-HSA-72165	4/52	0.0932157	0.546437	0	0	2.32045	5.50607	NCBP1;NCBP2;DDX23;SNRPF
Antigen processing: Ubiquitination & Proteasome degradation Homo sapiens R-HSA-983168	13/260	0.0932711	0.544674	0	0	1.5083	3.57805	UBE2B;SMURF2;HUWE1;NEDD4L;ITCH;SPSB1;CDC34;HECW2;ARIH2;RBCK1;UBA52;RNF111;SKP1
Toll-Like Receptors Cascades Homo sapiens R-HSA-168898	8/140	0.094374	0.54902	0	0	1.72377	4.06893	MAP2K3;MAPK10;APP;RPS6KA2;ITGB2;IKBKG;UBA52;SKP1
Transport of the SLBP independent Mature mRNA Homo sapiens R-HSA-159227	3/33	0.0951054	0.551179	0	0	2.74236	6.45213	NCBP1;NCBP2;NUP153
Translesion synthesis by REV1 Homo sapiens R-HSA-110312	2/16	0.0969515	0.559758	0	0	3.77074	8.79919	RFC1;UBA52
GRB2 events in ERBB2 signaling Homo sapiens R-HSA-1963640	2/16	0.0969515	0.557653	0	0	3.77074	8.79919	EGFR;EREG
JNK (c-Jun kinases) phosphorylation and activation mediated by activated human TAK1 Homo sapiens R-HSA-450321	2/16	0.0969515	0.555565	0	0	3.77074	8.79919	MAPK10;IKBKG
Sema3A PAK dependent Axon repulsion Homo sapiens R-HSA-399954	2/16	0.0969515	0.553492	0	0	3.77074	8.79919	NRP1;PAK2
Metabolism of folate and pterines Homo sapiens R-HSA-196757	2/16	0.0969515	0.551434	0	0	3.77074	8.79919	MTHFD1L;MTHFD2L
Factors involved in megakaryocyte development and platelet production Homo sapiens R-HSA-983231	8/141	0.0973234	0.5515	0	0	1.71154	3.9874	RAD51B;DOCK4;CAPZB;SIN3A;ABL1;KIF20A;KLC1;KIF15
TCR signaling Homo sapiens R-HSA-202403	7/118	0.0975395	0.550684	0	0	1.7895	4.16506	CDC34;PTPRJ;PIK3CB;IKBKG;UBA52;PAK2;SKP1
Programmed Cell Death Homo sapiens R-HSA-5357801	9/166	0.101413	0.570448	0	0	1.6355	3.74293	NMT1;HMGB2;ACIN1;CLSPN;UBA52;SPTAN1;PAK2;KPNA1;PLEC
Transport of the SLBP Dependant Mature mRNA Homo sapiens R-HSA-159230	3/34	0.101866	0.570898	0	0	2.6617	6.07958	NCBP1;NCBP2;NUP153
EPHA-mediated growth cone collapse Homo sapiens R-HSA-3928663	3/34	0.101866	0.568814	0	0	2.6617	6.07958	SHB;MYH10;EPHA2
EGFR interacts with phospholipase C-gamma Homo sapiens R-HSA-212718	3/34	0.101866	0.566746	0	0	2.6617	6.07958	ITPR3;PRKCA;EGFR
Lipoprotein metabolism Homo sapiens R-HSA-174824	3/34	0.101866	0.564692	0	0	2.6617	6.07958	LIPC;P4HB;HSPG2
Visual phototransduction Homo sapiens R-HSA-2187338	6/97	0.103204	0.570043	0	0	1.86593	4.23763	NMT1;PRKCA;PDE6A;AGRN;HSPG2;METAP2
Heparan sulfate/heparin (HS-GAG) metabolism Homo sapiens R-HSA-1638091	4/54	0.103565	0.569981	0	0	2.23451	5.06688	EXT1;VCAN;AGRN;HSPG2
G alpha (q) signalling events Homo sapiens R-HSA-416476	10/191	0.103994	0.570288	0	0	1.57937	3.57478	APP;RGS3;PRKCH;ANXA1;PLCB4;GNAQ;GNG7;ITPR3;KALRN;MGLL
Fcgamma receptor (FCGR) dependent phagocytosis Homo sapiens R-HSA-2029480	7/120	0.104232	0.569551	0	0	1.75968	3.97888	ABL1;ITPR3;MYO9B;PIK3CB;BAIAP2;ACTB;ACTG1
mRNA Splicing Homo sapiens R-HSA-72172	8/144	0.106481	0.579772	0	0	1.67588	3.75363	NCBP1;NCBP2;U2AF2;DDX23;DHX38;SNRPF;ELAVL1;CCAR1
Downstream signaling events of B Cell Receptor (BCR) Homo sapiens R-HSA-1168372	10/192	0.106657	0.578669	0	0	1.57114	3.51644	IRS1;GAB1;IRS2;TRIB3;PIK3CB;IKBKG;UBA52;EGFR;SKP1;EREG
Tristetraprolin (TTP, ZFP36) binds and destabilizes mRNA Homo sapiens R-HSA-450513	2/17	0.107554	0.581476	0	0	3.54893	7.91327	DCP1A;EXOSC2
Butyrate Response Factor 1 (BRF1) binds and destabilizes mRNA Homo sapiens R-HSA-450385	2/17	0.107554	0.579429	0	0	3.54893	7.91327	DCP1A;EXOSC2
Translesion synthesis by POLK Homo sapiens R-HSA-5655862	2/17	0.107554	0.577396	0	0	3.54893	7.91327	RFC1;UBA52
Translesion synthesis by POLI Homo sapiens R-HSA-5656121	2/17	0.107554	0.575377	0	0	3.54893	7.91327	RFC1;UBA52
activated TAK1 mediates p38 MAPK activation Homo sapiens R-HSA-450302	2/17	0.107554	0.573372	0	0	3.54893	7.91327	MAP2K3;IKBKG
RHO GTPases Activate ROCKs Homo sapiens R-HSA-5627117	2/17	0.107554	0.571381	0	0	3.54893	7.91327	PPP1R12A;MYH10
Fanconi Anemia Pathway Homo sapiens R-HSA-6783310	3/35	0.108812	0.576062	0	0	2.58565	5.73532	MUS81;EME2;UBA52
ECM proteoglycans Homo sapiens R-HSA-3000178	4/55	0.108929	0.574693	0	0	2.19388	4.86398	ITGB1;VCAN;TNC;AGRN
M Phase Homo sapiens R-HSA-68886	13/268	0.110806	0.582587	0	0	1.46327	3.21916	NEK6;PRKCA;NUP153;RANGAP1;SKA2;STAG1;NIPBL;CENPF;INCENP;KIF20A;UBA52;MAD1L1;NDEL1
Signaling by NOTCH Homo sapiens R-HSA-157118	7/122	0.111165	0.582475	0	0	1.73083	3.80218	NCOR2;ITCH;B4GALT1;ADAM10;UBA52;MAMLD1;SKP1
PI-3K cascade:FGFR1 Homo sapiens R-HSA-5654689	7/122	0.111165	0.580487	0	0	1.73083	3.80218	IRS1;GAB1;IRS2;TRIB3;PIK3CB;EGFR;EREG
PI-3K cascade:FGFR3 Homo sapiens R-HSA-5654710	7/122	0.111165	0.578513	0	0	1.73083	3.80218	IRS1;GAB1;IRS2;TRIB3;PIK3CB;EGFR;EREG
PI3K events in ERBB4 signaling Homo sapiens R-HSA-1250342	7/122	0.111165	0.576552	0	0	1.73083	3.80218	IRS1;GAB1;IRS2;TRIB3;PIK3CB;EGFR;EREG
PIP3 activates AKT signaling Homo sapiens R-HSA-1257604	7/122	0.111165	0.574604	0	0	1.73083	3.80218	IRS1;GAB1;IRS2;TRIB3;PIK3CB;EGFR;EREG
PI-3K cascade:FGFR4 Homo sapiens R-HSA-5654720	7/122	0.111165	0.572669	0	0	1.73083	3.80218	IRS1;GAB1;IRS2;TRIB3;PIK3CB;EGFR;EREG
PI-3K cascade:FGFR2 Homo sapiens R-HSA-5654695	7/122	0.111165	0.570748	0	0	1.73083	3.80218	IRS1;GAB1;IRS2;TRIB3;PIK3CB;EGFR;EREG
SHC1 events in ERBB2 signaling Homo sapiens R-HSA-1250196	2/18	0.118447	0.606099	0	0	3.35177	7.1503	EGFR;EREG
Cell surface interactions at the vascular wall Homo sapiens R-HSA-202733	6/101	0.119004	0.606919	0	0	1.79203	3.81452	ITGB1;ITGA3;ITGB2;SIRPA;PIK3CB;SLC7A11
GAB1 signalosome Homo sapiens R-HSA-180292	7/125	0.122011	0.620187	0	0	1.68929	3.55367	IRS1;GAB1;IRS2;TRIB3;PIK3CB;EGFR;EREG
PI3K/AKT activation Homo sapiens R-HSA-198203	7/125	0.122011	0.618134	0	0	1.68929	3.55367	IRS1;GAB1;IRS2;TRIB3;PIK3CB;EGFR;EREG
Transport of Mature mRNA Derived from an Intronless Transcript Homo sapiens R-HSA-159231	3/37	0.123228	0.622239	0	0	2.44588	5.121	NCBP1;NCBP2;NUP153
Regulation of insulin secretion Homo sapiens R-HSA-422356	5/80	0.126295	0.635627	0	0	1.88537	3.90109	GNG7;GNAQ;SLC2A1;PRKCA;ITPR3
Signaling by FGFR2 IIIa TM Homo sapiens R-HSA-8851708	2/19	0.129599	0.650118	0	0	3.17536	6.48825	NCBP1;NCBP2
Translesion Synthesis by POLH Homo sapiens R-HSA-110320	2/19	0.129599	0.647993	0	0	3.17536	6.48825	RFC1;UBA52
Other semaphorin interactions Homo sapiens R-HSA-416700	2/19	0.129599	0.645882	0	0	3.17536	6.48825	ITGB1;SEMA6A
Ephrin signaling Homo sapiens R-HSA-3928664	2/19	0.129599	0.643785	0	0	3.17536	6.48825	EPHB2;PAK2
Citric acid cycle (TCA cycle) Homo sapiens R-HSA-71403	2/19	0.129599	0.641702	0	0	3.17536	6.48825	OGDH;SDHA
Transport of Mature mRNAs Derived from Intronless Transcripts Homo sapiens R-HSA-159234	3/38	0.130682	0.644981	0	0	2.38152	4.84636	NCBP1;NCBP2;NUP153
Global Genome Nucleotide Excision Repair (GG-NER) Homo sapiens R-HSA-5696399	5/82	0.136142	0.669768	0	0	1.83938	3.66783	SUMO1;RFC1;UBA52;ACTB;RNF111
Presynaptic phase of homologous DNA pairing and strand exchange Homo sapiens R-HSA-5693616	3/39	0.138291	0.678158	0	0	2.32045	4.59077	RAD51B;HUS1;BRCA2
Class I MHC mediated antigen processing & presentation Homo sapiens R-HSA-983169	14/305	0.138367	0.676365	0	0	1.38466	2.73865	UBE2B;SMURF2;HUWE1;NEDD4L;ITCH;SPSB1;CDC34;HECW2;CANX;ARIH2;RBCK1;UBA52;RNF111;SKP1
Adaptive Immune System Homo sapiens R-HSA-1280218	31/762	0.140559	0.684891	0	0	1.22722	2.40796	ITGB1;IRS1;ITGB2;NEDD4L;IRS2;ITPR3;PTPRJ;PIK3CB;KLC1;EGFR;KIF15;ARIH2;IKBKG;PAK2;RNF111;SKP1;SPTBN2;UBE2B;SMURF2;GAB1;HUWE1;EREG;SPSB1;ITCH;CDC34;HECW2;CANX;TRIB3;RBCK1;KIF20A;UBA52
Signaling by Hippo Homo sapiens R-HSA-2028269	2/20	0.140981	0.684763	0	0	3.01659	5.9099	LATS1;AMOTL1
Ca2+ pathway Homo sapiens R-HSA-4086398	4/61	0.143563	0.695098	0	0	1.97809	3.83944	GNG7;PRKCA;ITPR3;PDE6A
Peptide chain elongation Homo sapiens R-HSA-156902	5/84	0.146319	0.706208	0	0	1.79559	3.45106	EEF1A1;RPS14;RPL35;EEF2;UBA52
Diseases associated with O-glycosylation of proteins Homo sapiens R-HSA-3906995	4/62	0.149714	0.720321	0	0	1.94619	3.69587	SPON1;THSD7A;ADAMTS9;THSD4
HS-GAG degradation Homo sapiens R-HSA-2024096	2/21	0.152565	0.731739	0	0	2.87294	5.4016	AGRN;HSPG2
NOTCH2 Activation and Transmission of Signal to the Nucleus Homo sapiens R-HSA-2979096	2/21	0.152565	0.729453	0	0	2.87294	5.4016	ADAM10;UBA52
RIP-mediated NFkB activation via ZBP1 Homo sapiens R-HSA-1810476	2/21	0.152565	0.72718	0	0	2.87294	5.4016	APP;IKBKG
VxPx cargo-targeting to cilium Homo sapiens R-HSA-5620916	2/21	0.152565	0.724922	0	0	2.87294	5.4016	ASAP1;RAB11FIP3
Signaling by the B Cell Receptor (BCR) Homo sapiens R-HSA-983705	11/233	0.152884	0.724185	0	0	1.42414	2.67465	IRS1;GAB1;TRIB3;IRS2;ITPR3;IKBKG;PIK3CB;UBA52;EGFR;SKP1;EREG
TNF signaling Homo sapiens R-HSA-75893	3/41	0.153939	0.726934	0	0	2.20726	4.13023	IKBKG;RBCK1;UBA52
Sperm:Oocyte Membrane Binding Homo sapiens R-HSA-1300652	1/5	0.155133	0.730319	0	0	6.03318	11.2427	CD9
Abacavir metabolism Homo sapiens R-HSA-2161541	1/5	0.155133	0.728079	0	0	6.03318	11.2427	NT5C2
Hyaluronan biosynthesis and export Homo sapiens R-HSA-2142850	1/5	0.155133	0.725853	0	0	6.03318	11.2427	HAS3
Extrinsic Pathway of Fibrin Clot Formation Homo sapiens R-HSA-140834	1/5	0.155133	0.72364	0	0	6.03318	11.2427	TFPI
Disinhibition of SNARE formation Homo sapiens R-HSA-114516	1/5	0.155133	0.72144	0	0	6.03318	11.2427	PRKCA
Loss of Function of FBXW7 in Cancer and NOTCH1 Signaling Homo sapiens R-HSA-2644607	1/5	0.155133	0.719254	0	0	6.03318	11.2427	SKP1
FBXW7 Mutants and NOTCH1 in Cancer Homo sapiens R-HSA-2644605	1/5	0.155133	0.717081	0	0	6.03318	11.2427	SKP1
Arachidonate production from DAG Homo sapiens R-HSA-426048	1/5	0.155133	0.714921	0	0	6.03318	11.2427	MGLL
Beta oxidation of hexanoyl-CoA to butanoyl-CoA Homo sapiens R-HSA-77350	1/5	0.155133	0.712774	0	0	6.03318	11.2427	HADHA
Beta oxidation of lauroyl-CoA to decanoyl-CoA-CoA Homo sapiens R-HSA-77310	1/5	0.155133	0.71064	0	0	6.03318	11.2427	HADHA
Beta oxidation of octanoyl-CoA to hexanoyl-CoA Homo sapiens R-HSA-77348	1/5	0.155133	0.708519	0	0	6.03318	11.2427	HADHA
Beta oxidation of decanoyl-CoA to octanoyl-CoA-CoA Homo sapiens R-HSA-77346	1/5	0.155133	0.70641	0	0	6.03318	11.2427	HADHA
Trafficking of myristoylated proteins to the cilium Homo sapiens R-HSA-5624138	1/5	0.155133	0.704314	0	0	6.03318	11.2427	ARL3
Galactose catabolism Homo sapiens R-HSA-70370	1/5	0.155133	0.70223	0	0	6.03318	11.2427	GALE
Signaling by FGFR in disease Homo sapiens R-HSA-1226099	4/63	0.155964	0.703908	0	0	1.9153	3.55887	NCBP1;NCBP2;MYO18A;GAB1
Regulation of mRNA stability by proteins that bind AU-rich elements Homo sapiens R-HSA-450531	5/86	0.15681	0.705643	0	0	1.75383	3.24937	PRKCA;DCP1A;ELAVL1;UBA52;EXOSC2
Signaling by Interleukins Homo sapiens R-HSA-449147	17/392	0.158308	0.710297	0	0	1.30822	2.41132	IRS1;DAB2IP;IRS2;RASAL2;PIK3CB;EGFR;EREG;DUSP10;IL3RA;NF1;IKBKG;UBA52;SPTAN1;SPTBN1;VCL;SKP1;SPTBN2
Integration of energy metabolism Homo sapiens R-HSA-163685	6/110	0.158571	0.709395	0	0	1.64541	3.03012	GNAQ;GNG7;SLC2A1;PRKAG2;PRKCA;ITPR3
Signaling by Retinoic Acid Homo sapiens R-HSA-5362517	3/42	0.161962	0.722455	0	0	2.15471	3.92241	RXRA;ALDH1A2;RARA
Homologous DNA Pairing and Strand Exchange Homo sapiens R-HSA-5693579	3/42	0.161962	0.720355	0	0	2.15471	3.92241	RAD51B;HUS1;BRCA2
Netrin-1 signaling Homo sapiens R-HSA-373752	3/42	0.161962	0.718267	0	0	2.15471	3.92241	ABLIM2;ABLIM3;EZR
BMAL1:CLOCK,NPAS2 activates circadian gene expression Homo sapiens R-HSA-1368108	3/42	0.161962	0.716191	0	0	2.15471	3.92241	RXRA;CHD9;NRIP1
SALM protein interactions at the synapse Homo sapiens R-HSA-8849932	2/22	0.164327	0.724553	0	0	2.74236	4.95242	PTPRD;PTPRF
HIV Transcription Elongation Homo sapiens R-HSA-167169	3/43	0.170108	0.747889	0	0	2.1046	3.72792	SUPT16H;NCBP1;NCBP2
Tat-mediated elongation of the HIV-1 transcript Homo sapiens R-HSA-167246	3/43	0.170108	0.745746	0	0	2.1046	3.72792	SUPT16H;NCBP1;NCBP2
Formation of HIV-1 elongation complex containing HIV-1 Tat Homo sapiens R-HSA-167200	3/43	0.170108	0.743616	0	0	2.1046	3.72792	SUPT16H;NCBP1;NCBP2
Formation of Incision Complex in GG-NER Homo sapiens R-HSA-5696395	3/43	0.170108	0.741497	0	0	2.1046	3.72792	SUMO1;UBA52;RNF111
Signaling by FGFR2 in disease Homo sapiens R-HSA-5655253	3/43	0.170108	0.739391	0	0	2.1046	3.72792	NCBP1;NCBP2;GAB1
Separation of Sister Chromatids Homo sapiens R-HSA-2467813	8/162	0.170686	0.739801	0	0	1.48967	2.63364	STAG1;CENPF;INCENP;RANGAP1;UBA52;MAD1L1;SKA2;NDEL1
PPARA activates gene expression Homo sapiens R-HSA-1989781	6/113	0.172892	0.747244	0	0	1.60173	2.81118	TIAM2;MED13;RXRA;CHD9;TRIB3;TEAD1
Eukaryotic Translation Elongation Homo sapiens R-HSA-156842	5/89	0.1731	0.746037	0	0	1.69471	2.97233	EEF1A1;RPS14;RPL35;EEF2;UBA52
Nonsense Mediated Decay (NMD) independent of the Exon Junction Complex (EJC) Homo sapiens R-HSA-975956	5/89	0.1731	0.743941	0	0	1.69471	2.97233	RPS14;NCBP1;NCBP2;RPL35;UBA52
Abortive elongation of HIV-1 transcript in the absence of Tat Homo sapiens R-HSA-167242	2/23	0.176241	0.755317	0	0	2.62312	4.55349	NCBP1;NCBP2
Gap-filling DNA repair synthesis and ligation in GG-NER Homo sapiens R-HSA-5696397	2/23	0.176241	0.753207	0	0	2.62312	4.55349	RFC1;UBA52
Kinesins Homo sapiens R-HSA-983189	3/44	0.178369	0.76018	0	0	2.05677	3.54566	KIF20A;KLC1;KIF15
Formation of HIV elongation complex in the absence of HIV Tat Homo sapiens R-HSA-167152	3/44	0.178369	0.758068	0	0	2.05677	3.54566	SUPT16H;NCBP1;NCBP2
RNA Polymerase II Transcription Elongation Homo sapiens R-HSA-75955	3/44	0.178369	0.755968	0	0	2.05677	3.54566	SUPT16H;NCBP1;NCBP2
Formation of RNA Pol II elongation complex Homo sapiens R-HSA-112382	3/44	0.178369	0.75388	0	0	2.05677	3.54566	SUPT16H;NCBP1;NCBP2
Interleukin-1 signaling Homo sapiens R-HSA-446652	3/44	0.178369	0.751803	0	0	2.05677	3.54566	IKBKG;UBA52;SKP1
PLC beta mediated events Homo sapiens R-HSA-112043	3/44	0.178369	0.749738	0	0	2.05677	3.54566	PLCB4;ITPR3;PRKCA
Regulation of RAS by GAPs Homo sapiens R-HSA-5658442	4/67	0.181885	0.76242	0	0	1.80095	3.06951	DAB2IP;NF1;RASAL2;UBA52
SUMO is proteolytically processed Homo sapiens R-HSA-3065679	1/6	0.183147	0.765617	0	0	5.02765	8.53426	SUMO1
Misspliced LRP5 mutants have enhanced beta-catenin-dependent signaling Homo sapiens R-HSA-5339717	1/6	0.183147	0.76353	0	0	5.02765	8.53426	LRP5
Fibronectin matrix formation Homo sapiens R-HSA-1566977	1/6	0.183147	0.761456	0	0	5.02765	8.53426	ITGB1
RSK activation Homo sapiens R-HSA-444257	1/6	0.183147	0.759392	0	0	5.02765	8.53426	RPS6KA2
mitochondrial fatty acid beta-oxidation of unsaturated fatty acids Homo sapiens R-HSA-77288	1/6	0.183147	0.75734	0	0	5.02765	8.53426	HADHA
Acyl chain remodeling of CL Homo sapiens R-HSA-1482798	1/6	0.183147	0.755298	0	0	5.02765	8.53426	HADHA
Fatty acid, triacylglycerol, and ketone body metabolism Homo sapiens R-HSA-535734	10/217	0.185298	0.762112	0	0	1.39013	2.34348	TIAM2;NCOR2;HADHA;MED13;RXRA;CHD9;SIN3A;PRKAG2;TRIB3;TEAD1
G-protein mediated events Homo sapiens R-HSA-112040	3/45	0.186737	0.765972	0	0	2.01106	3.37467	PLCB4;ITPR3;PRKCA
Growth hormone receptor signaling Homo sapiens R-HSA-982772	2/24	0.188284	0.770252	0	0	2.51383	4.1976	IRS1;IRS2
TRAF6 mediated NF-kB activation Homo sapiens R-HSA-933542	2/24	0.188284	0.768198	0	0	2.51383	4.1976	APP;IKBKG
IKK complex recruitment mediated by RIP1 Homo sapiens R-HSA-937041	2/24	0.188284	0.766155	0	0	2.51383	4.1976	IKBKG;UBA52
DNA Damage Bypass Homo sapiens R-HSA-73893	3/46	0.195204	0.792209	0	0	1.96734	3.21406	RFC1;UBE2B;UBA52
G alpha (z) signalling events Homo sapiens R-HSA-418597	3/46	0.195204	0.790113	0	0	1.96734	3.21406	PRKCH;GNG7;PRKCA
G0 and Early G1 Homo sapiens R-HSA-1538133	2/25	0.200435	0.809144	0	0	2.41327	3.87877	TOP2A;DYRK1A
ADP signalling through P2Y purinoceptor 1 Homo sapiens R-HSA-418592	2/25	0.200435	0.807014	0	0	2.41327	3.87877	GNG7;GNAQ
Activation of G protein gated Potassium channels Homo sapiens R-HSA-1296041	2/25	0.200435	0.804896	0	0	2.41327	3.87877	GNG7;KCNJ16
Inhibition of voltage gated Ca2+ channels via Gbeta/gamma subunits Homo sapiens R-HSA-997272	2/25	0.200435	0.802789	0	0	2.41327	3.87877	GNG7;KCNJ16
G protein gated Potassium channels Homo sapiens R-HSA-1296059	2/25	0.200435	0.800693	0	0	2.41327	3.87877	GNG7;KCNJ16
Beta-catenin independent WNT signaling Homo sapiens R-HSA-3858494	7/144	0.201972	0.804733	0	0	1.4664	2.34569	SMURF2;GNG7;PRKCA;ROR1;ITPR3;PDE6A;UBA52
Nucleotide-binding domain, leucine rich repeat containing receptor (NLR) signaling pathways Homo sapiens R-HSA-168643	3/47	0.203764	0.809763	0	0	1.92548	3.06305	APP;ITCH;IKBKG
APEX1-Independent Resolution of AP Sites via the Single Nucleotide Replacement Pathway Homo sapiens R-HSA-5649702	1/7	0.210234	0.833312	0	0	4.30942	6.72068	PNKP
Defective CHST3 causes SEDCJD Homo sapiens R-HSA-3595172	1/7	0.210234	0.831159	0	0	4.30942	6.72068	VCAN
Defective CHSY1 causes TPBS Homo sapiens R-HSA-3595177	1/7	0.210234	0.829016	0	0	4.30942	6.72068	VCAN
Defective CHST14 causes EDS, musculocontractural type Homo sapiens R-HSA-3595174	1/7	0.210234	0.826885	0	0	4.30942	6.72068	VCAN
Attachment of GPI anchor to uPAR Homo sapiens R-HSA-162791	1/7	0.210234	0.824765	0	0	4.30942	6.72068	PLAUR
NrCAM interactions Homo sapiens R-HSA-447038	1/7	0.210234	0.822656	0	0	4.30942	6.72068	NRP2
Regulation of gene expression in late stage (branching morphogenesis) pancreatic bud precursor cells Homo sapiens R-HSA-210744	1/7	0.210234	0.820557	0	0	4.30942	6.72068	HNF1B
Signaling by NOTCH1 t(7;9)(NOTCH1:M1580 K2555) Translocation Mutant Homo sapiens R-HSA-2660825	1/7	0.210234	0.818469	0	0	4.30942	6.72068	ADAM10
Constitutive Signaling by NOTCH1 t(7;9)(NOTCH1:M1580 K2555) Translocation Mutant Homo sapiens R-HSA-2660826	1/7	0.210234	0.816392	0	0	4.30942	6.72068	ADAM10
PTK6 promotes HIF1A stabilization Homo sapiens R-HSA-8857538	1/7	0.210234	0.814325	0	0	4.30942	6.72068	EGFR
IkBA variant leads to EDA-ID Homo sapiens R-HSA-5603029	1/7	0.210234	0.812269	0	0	4.30942	6.72068	IKBKG
Activation of NIMA Kinases NEK9, NEK6, NEK7 Homo sapiens R-HSA-2980767	1/7	0.210234	0.810223	0	0	4.30942	6.72068	NEK6
CREB phosphorylation Homo sapiens R-HSA-199920	1/7	0.210234	0.808187	0	0	4.30942	6.72068	RPS6KA2
Phase 3 - rapid repolarisation Homo sapiens R-HSA-5576890	1/7	0.210234	0.806161	0	0	4.30942	6.72068	KCNQ1
Acyl chain remodeling of DAG and TAG Homo sapiens R-HSA-1482883	1/7	0.210234	0.804146	0	0	4.30942	6.72068	MGLL
Death Receptor Signalling Homo sapiens R-HSA-73887	3/48	0.212408	0.810435	0	0	1.88537	2.9209	IKBKG;RBCK1;UBA52
EPH-ephrin mediated repulsion of cells Homo sapiens R-HSA-3928665	3/48	0.212408	0.808419	0	0	1.88537	2.9209	ADAM10;EPHB2;EPHA2
G beta:gamma signalling through PI3Kgamma Homo sapiens R-HSA-392451	3/48	0.212408	0.806413	0	0	1.88537	2.9209	GNG7;IL3RA;PIK3CB
Pyruvate metabolism and Citric Acid (TCA) cycle Homo sapiens R-HSA-71406	3/48	0.212408	0.804417	0	0	1.88537	2.9209	RXRA;OGDH;SDHA
Fertilization Homo sapiens R-HSA-1187000	2/26	0.212673	0.803433	0	0	2.32045	3.59206	B4GALT1;CD9
Reproduction Homo sapiens R-HSA-1474165	2/26	0.212673	0.801454	0	0	2.32045	3.59206	B4GALT1;CD9
FGFR2 alternative splicing Homo sapiens R-HSA-6803529	2/26	0.212673	0.799485	0	0	2.32045	3.59206	NCBP1;NCBP2
Resolution of D-loop Structures through Synthesis-Dependent Strand Annealing (SDSA) Homo sapiens R-HSA-5693554	2/26	0.212673	0.797525	0	0	2.32045	3.59206	RAD51B;BRCA2
ZBP1(DAI) mediated induction of type I IFNs Homo sapiens R-HSA-1606322	2/26	0.212673	0.795575	0	0	2.32045	3.59206	APP;IKBKG
TAK1 activates NFkB by phosphorylation and activation of IKKs complex Homo sapiens R-HSA-445989	2/26	0.212673	0.793635	0	0	2.32045	3.59206	APP;IKBKG
TNFR1-induced NFkappaB signaling pathway Homo sapiens R-HSA-5357956	2/26	0.212673	0.791704	0	0	2.32045	3.59206	IKBKG;RBCK1
Cellular response to heat stress Homo sapiens R-HSA-3371556	5/96	0.21341	0.792516	0	0	1.57114	2.42669	EEF1A1;HSPA9;HSPA4;NUP153;CCAR2
Glycosaminoglycan metabolism Homo sapiens R-HSA-1630316	6/121	0.213473	0.790833	0	0	1.49583	2.30993	EXT1;VCAN;B4GALT1;HAS3;AGRN;HSPG2
ISG15 antiviral mechanism Homo sapiens R-HSA-1169408	4/72	0.216081	0.798562	0	0	1.67588	2.56762	FLNB;NUP153;UBA52;KPNA1
Antiviral mechanism by IFN-stimulated genes Homo sapiens R-HSA-1169410	4/72	0.216081	0.796637	0	0	1.67588	2.56762	FLNB;NUP153;UBA52;KPNA1
Mitotic Anaphase Homo sapiens R-HSA-68882	8/173	0.216835	0.797495	0	0	1.39496	2.13235	STAG1;CENPF;INCENP;RANGAP1;UBA52;MAD1L1;SKA2;NDEL1
Regulation of actin dynamics for phagocytic cup formation Homo sapiens R-HSA-2029482	5/97	0.219399	0.804989	0	0	1.55494	2.35864	ABL1;MYO9B;BAIAP2;ACTB;ACTG1
Mitochondrial biogenesis Homo sapiens R-HSA-1592230	3/49	0.22113	0.809399	0	0	1.84689	2.78697	RXRA;CHD9;PRKAG2
Mitotic Metaphase and Anaphase Homo sapiens R-HSA-2555396	8/174	0.22125	0.807905	0	0	1.38694	2.09214	STAG1;CENPF;INCENP;RANGAP1;UBA52;MAD1L1;SKA2;NDEL1
Positive epigenetic regulation of rRNA expression Homo sapiens R-HSA-5250913	4/73	0.223123	0.812806	0	0	1.65293	2.47944	MBD3;DEK;BAZ1B;ACTB
C-type lectin receptors (CLRs) Homo sapiens R-HSA-5621481	6/123	0.224101	0.814427	0	0	1.47151	2.20088	CDC34;ITPR3;IKBKG;UBA52;PAK2;SKP1
VEGFR2 mediated vascular permeability Homo sapiens R-HSA-5218920	2/27	0.22498	0.815687	0	0	2.23451	3.33332	TRIB3;PAK2
Sema4D in semaphorin signaling Homo sapiens R-HSA-400685	2/27	0.22498	0.813758	0	0	2.23451	3.33332	MYH10;MET
Chondroitin sulfate/dermatan sulfate metabolism Homo sapiens R-HSA-1793185	3/50	0.229922	0.829672	0	0	1.80995	2.66066	VCAN;AGRN;HSPG2
Deadenylation-dependent mRNA decay Homo sapiens R-HSA-429914	3/50	0.229922	0.82772	0	0	1.80995	2.66066	CNOT10;DCP1A;EXOSC2
CLEC7A (Dectin-1) signaling Homo sapiens R-HSA-5607764	5/99	0.231529	0.831548	0	0	1.52353	2.229	CDC34;ITPR3;IKBKG;UBA52;SKP1
Downstream TCR signaling Homo sapiens R-HSA-202424	5/99	0.231529	0.8296	0	0	1.52353	2.229	CDC34;PIK3CB;IKBKG;UBA52;SKP1
Vitamin C (ascorbate) metabolism Homo sapiens R-HSA-196836	1/8	0.236424	0.845161	0	0	3.77074	5.43789	SLC2A1
Insulin-like Growth Factor-2 mRNA Binding Proteins (IGF2BPs/IMPs/VICKZs) bind RNA Homo sapiens R-HSA-428359	1/8	0.236424	0.843191	0	0	3.77074	5.43789	ACTB
Synthesis of diphthamide-EEF2 Homo sapiens R-HSA-5358493	1/8	0.236424	0.84123	0	0	3.77074	5.43789	EEF2
AMPK inhibits chREBP transcriptional activation activity Homo sapiens R-HSA-163680	1/8	0.236424	0.839278	0	0	3.77074	5.43789	PRKAG2
Nef and signal transduction Homo sapiens R-HSA-164944	1/8	0.236424	0.837335	0	0	3.77074	5.43789	PAK2
Regulation of gene expression in early pancreatic precursor cells Homo sapiens R-HSA-210747	1/8	0.236424	0.835402	0	0	3.77074	5.43789	HNF1B
IKBKG deficiency causes anhidrotic ectodermal dysplasia with immunodeficiency (EDA-ID) (via TLR) Homo sapiens R-HSA-5603027	1/8	0.236424	0.833477	0	0	3.77074	5.43789	IKBKG
RNF mutants show enhanced WNT signaling and proliferation Homo sapiens R-HSA-5340588	1/8	0.236424	0.831561	0	0	3.77074	5.43789	LRP5
Regulation of cytoskeletal remodeling and cell spreading by IPP complex components Homo sapiens R-HSA-446388	1/8	0.236424	0.829653	0	0	3.77074	5.43789	LIMS1
Sema4D mediated inhibition of cell attachment and migration Homo sapiens R-HSA-416550	1/8	0.236424	0.827755	0	0	3.77074	5.43789	MET
Free fatty acids regulate insulin secretion Homo sapiens R-HSA-400451	1/8	0.236424	0.825865	0	0	3.77074	5.43789	GNAQ
Fatty Acids bound to GPR40 (FFAR1) regulate insulin secretion Homo sapiens R-HSA-434316	1/8	0.236424	0.823984	0	0	3.77074	5.43789	GNAQ
mitochondrial fatty acid beta-oxidation of saturated fatty acids Homo sapiens R-HSA-77286	1/8	0.236424	0.822111	0	0	3.77074	5.43789	HADHA
Coenzyme A biosynthesis Homo sapiens R-HSA-196783	1/8	0.236424	0.820247	0	0	3.77074	5.43789	PANK2
Metabolism of ingested SeMet, Sec, MeSec into H2Se Homo sapiens R-HSA-2408508	1/8	0.236424	0.818391	0	0	3.77074	5.43789	CBS
Energy dependent regulation of mTOR by LKB1-AMPK Homo sapiens R-HSA-380972	2/28	0.237337	0.819698	0	0	2.15471	3.09906	PRKAG2;TSC1
Endosomal Sorting Complex Required For Transport (ESCRT) Homo sapiens R-HSA-917729	2/28	0.237337	0.817852	0	0	2.15471	3.09906	CHMP6;UBA52
Stimuli-sensing channels Homo sapiens R-HSA-2672351	5/100	0.237665	0.81714	0	0	1.5083	2.16726	ASPH;SCNN1A;NEDD4L;ANO10;UBA52
Nuclear Envelope Breakdown Homo sapiens R-HSA-2980766	3/51	0.238778	0.819125	0	0	1.77447	2.54143	NEK6;PRKCA;NUP153
Cargo trafficking to the periciliary membrane Homo sapiens R-HSA-5620920	3/51	0.238778	0.817292	0	0	1.77447	2.54143	ARL3;ASAP1;RAB11FIP3
G-protein beta:gamma signalling Homo sapiens R-HSA-397795	3/51	0.238778	0.815468	0	0	1.77447	2.54143	GNG7;IL3RA;PIK3CB
Nonhomologous End-Joining (NHEJ) Homo sapiens R-HSA-5693571	3/52	0.247689	0.84402	0	0	1.74034	2.42878	SUMO1;BRE;WHSC1
mRNA Capping Homo sapiens R-HSA-72086	2/29	0.249728	0.849076	0	0	2.08041	2.88632	NCBP1;NCBP2
MHC class II antigen presentation Homo sapiens R-HSA-2132295	5/103	0.25633	0.869588	0	0	1.46436	1.99343	CANX;KIF20A;KLC1;SPTBN2;KIF15
Host Interactions of HIV factors Homo sapiens R-HSA-162909	6/129	0.256948	0.869756	0	0	1.40307	1.9066	NUP153;RANGAP1;UBA52;PAK2;KPNA1;SKP1
G2/M DNA damage checkpoint Homo sapiens R-HSA-69473	4/78	0.259144	0.875256	0	0	1.54697	2.08898	SUMO1;BRE;HUS1;WHSC1
Type I hemidesmosome assembly Homo sapiens R-HSA-446107	1/9	0.261747	0.882098	0	0	3.35177	4.49264	PLEC
Integration of provirus Homo sapiens R-HSA-162592	1/9	0.261747	0.880159	0	0	3.35177	4.49264	KPNA1
PTK6 Regulates RTKs and Their Effectors AKT1 and DOK1 Homo sapiens R-HSA-8849469	1/9	0.261747	0.878229	0	0	3.35177	4.49264	UBA52
RHO GTPases Activate Rhotekin and Rhophilins Homo sapiens R-HSA-5666185	1/9	0.261747	0.876307	0	0	3.35177	4.49264	RHPN1
Molecules associated with elastic fibres Homo sapiens R-HSA-2129379	2/30	0.262137	0.875697	0	0	2.01106	2.69259	ITGB1;LTBP2
Transport of Ribonucleoproteins into the Host Nucleus Homo sapiens R-HSA-168271	2/30	0.262137	0.873789	0	0	2.01106	2.69259	NUP153;KPNA1
Termination of translesion DNA synthesis Homo sapiens R-HSA-5656169	2/30	0.262137	0.87189	0	0	2.01106	2.69259	RFC1;UBA52
MAPK targets/ Nuclear events mediated by MAP kinases Homo sapiens R-HSA-450282	2/30	0.262137	0.869998	0	0	2.01106	2.69259	MAPK10;RPS6KA2
Tight junction interactions Homo sapiens R-HSA-420029	2/30	0.262137	0.868115	0	0	2.01106	2.69259	PARD3;CLDN16
RIG-I/MDA5 mediated induction of IFN-alpha/beta pathways Homo sapiens R-HSA-168928	4/79	0.266486	0.880611	0	0	1.52739	2.01987	APP;ITCH;IKBKG;UBA52
Transcriptional regulation of white adipocyte differentiation Homo sapiens R-HSA-381340	4/79	0.266486	0.878713	0	0	1.52739	2.01987	NCOR2;MED13;RXRA;CHD9
Regulation of HSF1-mediated heat shock response Homo sapiens R-HSA-3371453	4/80	0.273864	0.901101	0	0	1.5083	1.95343	HSPA9;HSPA4;NUP153;CCAR2
Amino acid transport across the plasma membrane Homo sapiens R-HSA-352230	2/31	0.274548	0.901414	0	0	1.94619	2.5157	SLC38A1;SLC7A11
NOD1/2 Signaling Pathway Homo sapiens R-HSA-168638	2/31	0.274548	0.899484	0	0	1.94619	2.5157	ITCH;IKBKG
Inwardly rectifying K+ channels Homo sapiens R-HSA-1296065	2/31	0.274548	0.897562	0	0	1.94619	2.5157	GNG7;KCNJ16
Degradation of the extracellular matrix Homo sapiens R-HSA-1474228	5/106	0.275332	0.898206	0	0	1.42292	1.83525	ADAM10;PSEN1;HSPG2;ADAMTS9;CAPN15
Nonsense-Mediated Decay (NMD) Homo sapiens R-HSA-927802	5/106	0.275332	0.896295	0	0	1.42292	1.83525	RPS14;NCBP1;NCBP2;RPL35;UBA52
Nonsense Mediated Decay (NMD) enhanced by the Exon Junction Complex (EJC) Homo sapiens R-HSA-975957	5/106	0.275332	0.894392	0	0	1.42292	1.83525	RPS14;NCBP1;NCBP2;RPL35;UBA52
Opioid Signalling Homo sapiens R-HSA-111885	4/81	0.281276	0.911764	0	0	1.48967	1.88953	PLCB4;GNG7;PRKCA;ITPR3
Assembly of the primary cilium Homo sapiens R-HSA-5617833	8/187	0.281338	0.910037	0	0	1.29052	1.63663	C2CD3;ARL3;CEP131;TRIP11;ASAP1;TUBG1;RAB11FIP3;CDK5RAP2
HATs acetylate histones Homo sapiens R-HSA-3214847	5/107	0.281731	0.909386	0	0	1.40962	1.78571	MORF4L1;EP400;JADE2;OGT;ACTB
Interaction With The Zona Pellucida Homo sapiens R-HSA-1300644	1/10	0.286231	0.921965	0	0	3.01659	3.77363	B4GALT1
Zinc influx into cells by the SLC39 gene family Homo sapiens R-HSA-442380	1/10	0.286231	0.920028	0	0	3.01659	3.77363	SLC39A10
Abacavir transport and metabolism Homo sapiens R-HSA-2161522	1/10	0.286231	0.918099	0	0	3.01659	3.77363	NT5C2
Establishment of Sister Chromatid Cohesion Homo sapiens R-HSA-2468052	1/10	0.286231	0.916178	0	0	3.01659	3.77363	STAG1
Reactions specific to the complex N-glycan synthesis pathway Homo sapiens R-HSA-975578	1/10	0.286231	0.914265	0	0	3.01659	3.77363	FUT8
Activation of PPARGC1A (PGC-1alpha) by phosphorylation Homo sapiens R-HSA-2151209	1/10	0.286231	0.912361	0	0	3.01659	3.77363	PRKAG2
IRAK2 mediated activation of TAK1 complex upon TLR7/8 or 9 stimulation Homo sapiens R-HSA-975163	1/10	0.286231	0.910464	0	0	3.01659	3.77363	UBA52
IRAK2 mediated activation of TAK1 complex Homo sapiens R-HSA-937042	1/10	0.286231	0.908575	0	0	3.01659	3.77363	UBA52
Diseases of carbohydrate metabolism Homo sapiens R-HSA-5663084	1/10	0.286231	0.906694	0	0	3.01659	3.77363	UBA52
Myoclonic epilepsy of Lafora Homo sapiens R-HSA-3785653	1/10	0.286231	0.904821	0	0	3.01659	3.77363	UBA52
Glycogen storage diseases Homo sapiens R-HSA-3229121	1/10	0.286231	0.902955	0	0	3.01659	3.77363	UBA52
Signaling by FGFR3 fusions in cancer Homo sapiens R-HSA-8853334	1/10	0.286231	0.901097	0	0	3.01659	3.77363	GAB1
Activation of the AP-1 family of transcription factors Homo sapiens R-HSA-450341	1/10	0.286231	0.899247	0	0	3.01659	3.77363	MAPK10
IRAK1 recruits IKK complex Homo sapiens R-HSA-937039	1/10	0.286231	0.897404	0	0	3.01659	3.77363	IKBKG
IRAK1 recruits IKK complex upon TLR7/8 or 9 stimulation Homo sapiens R-HSA-975144	1/10	0.286231	0.895569	0	0	3.01659	3.77363	IKBKG
GP1b-IX-V activation signalling Homo sapiens R-HSA-430116	1/10	0.286231	0.893741	0	0	3.01659	3.77363	FLNA
Folding of actin by CCT/TriC Homo sapiens R-HSA-390450	1/10	0.286231	0.891921	0	0	3.01659	3.77363	ACTB
Vpr-mediated nuclear import of PICs Homo sapiens R-HSA-180910	2/32	0.286949	0.892342	0	0	1.88537	2.35379	NUP153;KPNA1
DAG and IP3 signaling Homo sapiens R-HSA-1489509	2/32	0.286949	0.890532	0	0	1.88537	2.35379	ITPR3;PRKCA
Nucleotide Excision Repair Homo sapiens R-HSA-5696398	5/108	0.288159	0.892476	0	0	1.39657	1.73767	SUMO1;RFC1;UBA52;ACTB;RNF111
Role of LAT2/NTAL/LAB on calcium mobilization Homo sapiens R-HSA-2730905	7/162	0.291615	0.901357	0	0	1.30347	1.60629	IRS1;GAB1;IRS2;TRIB3;PIK3CB;EGFR;EREG
Meiotic synapsis Homo sapiens R-HSA-1221632	3/57	0.292868	0.903404	0	0	1.58768	1.94972	DIDO1;STAG1;SYNE1
Influenza Life Cycle Homo sapiens R-HSA-168255	6/136	0.296746	0.913523	0	0	1.33085	1.61682	RPS14;CANX;RPL35;NUP153;UBA52;KPNA1
CD28 co-stimulation Homo sapiens R-HSA-389356	2/33	0.299326	0.919616	0	0	1.82824	2.20526	TRIB3;PAK2
Rev-mediated nuclear export of HIV RNA Homo sapiens R-HSA-165054	2/33	0.299326	0.917773	0	0	1.82824	2.20526	NUP153;RANGAP1
Formation of the Early Elongation Complex Homo sapiens R-HSA-113418	2/33	0.299326	0.915938	0	0	1.82824	2.20526	NCBP1;NCBP2
Formation of the HIV-1 Early Elongation Complex Homo sapiens R-HSA-167158	2/33	0.299326	0.91411	0	0	1.82824	2.20526	NCBP1;NCBP2
FGFR2 mutant receptor activation Homo sapiens R-HSA-1839126	2/33	0.299326	0.912289	0	0	1.82824	2.20526	NCBP1;NCBP2
Smooth Muscle Contraction Homo sapiens R-HSA-445355	2/33	0.299326	0.910475	0	0	1.82824	2.20526	ANXA1;VCL
O-linked glycosylation Homo sapiens R-HSA-5173105	5/110	0.301091	0.914027	0	0	1.37118	1.64588	SPON1;GCNT1;THSD7A;ADAMTS9;THSD4
B-WICH complex positively regulates rRNA expression Homo sapiens R-HSA-5250924	3/58	0.301984	0.914923	0	0	1.56031	1.86828	DEK;BAZ1B;ACTB
Selenoamino acid metabolism Homo sapiens R-HSA-2408522	5/111	0.307591	0.930069	0	0	1.35882	1.60203	RPS14;CBS;RPL35;SARS;UBA52
Uptake and function of anthrax toxins Homo sapiens R-HSA-5210891	1/11	0.309904	0.935213	0	0	2.74236	3.21265	MAP2K3
Dermatan sulfate biosynthesis Homo sapiens R-HSA-2022923	1/11	0.309904	0.933372	0	0	2.74236	3.21265	VCAN
Signaling by NOTCH3 Homo sapiens R-HSA-1980148	1/11	0.309904	0.931539	0	0	2.74236	3.21265	ADAM10
Signaling by NOTCH4 Homo sapiens R-HSA-1980150	1/11	0.309904	0.929712	0	0	2.74236	3.21265	ADAM10
Membrane binding and targetting of GAG proteins Homo sapiens R-HSA-174490	1/11	0.309904	0.927893	0	0	2.74236	3.21265	UBA52
Synthesis And Processing Of GAG, GAGPOL Polyproteins Homo sapiens R-HSA-174495	1/11	0.309904	0.92608	0	0	2.74236	3.21265	UBA52
Signaling by FGFR4 in disease Homo sapiens R-HSA-5655291	1/11	0.309904	0.924275	0	0	2.74236	3.21265	GAB1
Recruitment of NuMA to mitotic centrosomes Homo sapiens R-HSA-380320	1/11	0.309904	0.922477	0	0	2.74236	3.21265	TUBG1
Activation of the phototransduction cascade Homo sapiens R-HSA-2485179	1/11	0.309904	0.920686	0	0	2.74236	3.21265	PDE6A
CLEC7A (Dectin-1) induces NFAT activation Homo sapiens R-HSA-5607763	1/11	0.309904	0.918902	0	0	2.74236	3.21265	ITPR3
Synthesis of IP2, IP, and Ins in the cytosol Homo sapiens R-HSA-1855183	1/11	0.309904	0.917124	0	0	2.74236	3.21265	INPP4A
Defects in cobalamin (B12) metabolism Homo sapiens R-HSA-3296469	1/11	0.309904	0.915354	0	0	2.74236	3.21265	MMADHC
Biotin transport and metabolism Homo sapiens R-HSA-196780	1/11	0.309904	0.91359	0	0	2.74236	3.21265	BTD
DNA Damage/Telomere Stress Induced Senescence Homo sapiens R-HSA-2559586	3/59	0.311114	0.915392	0	0	1.53386	1.79093	UBN1;EP400;HMGA2
Degradation of GLI1 by the proteasome Homo sapiens R-HSA-5610780	3/59	0.311114	0.913635	0	0	1.53386	1.79093	ITCH;UBA52;SKP1
Meiosis Homo sapiens R-HSA-1500620	4/85	0.311196	0.912127	0	0	1.41957	1.65711	DIDO1;STAG1;BRCA2;SYNE1
Nuclear Pore Complex (NPC) Disassembly Homo sapiens R-HSA-3301854	2/34	0.311667	0.911761	0	0	1.77447	2.06871	NEK6;NUP153
Negative regulators of RIG-I/MDA5 signaling Homo sapiens R-HSA-936440	2/34	0.311667	0.910021	0	0	1.77447	2.06871	ITCH;UBA52
PLC-gamma1 signalling Homo sapiens R-HSA-167021	2/34	0.311667	0.908288	0	0	1.77447	2.06871	ITPR3;PRKCA
Synthesis of PIPs at the plasma membrane Homo sapiens R-HSA-1660499	2/34	0.311667	0.906561	0	0	1.77447	2.06871	INPP4A;PIK3CB
Purine metabolism Homo sapiens R-HSA-73847	2/34	0.311667	0.904841	0	0	1.77447	2.06871	GDA;NT5C2
Immune System Homo sapiens R-HSA-168256	55/1547	0.31186	0.903685	0	0	1.07248	1.24965	ITGB1;APP;IRS1;ITGB2;IRS2;PTPRJ;PIK3CB;ACTB;KIF15;ACTG1;DUSP10;SUMO1;RPS6KA2;ARIH2;IKBKG;SPTAN1;RNF111;KPNA1;SKP1;MAP2K3;GAB1;PRKCA;EREG;EDAR;CDC34;HECW2;IL3RA;CANX;TRIB3;RBCK1;KIF20A;UBA52;VCL;ATP6V1A;NEDD4L;ITPR3;RASAL2;KLC1;EGFR;ABL1;FLNB;PAK2;SPTBN1;SPTBN2;UBE2B;SMURF2;DAB2IP;HUWE1;MYO9B;NUP153;BAIAP2;MAPK10;SPSB1;ITCH;NF1
Interactions of Rev with host cellular proteins Homo sapiens R-HSA-177243	2/35	0.323962	0.936978	0	0	1.72377	1.94291	NUP153;RANGAP1
Interactions of Vpr with host cellular proteins Homo sapiens R-HSA-176033	2/35	0.323962	0.93521	0	0	1.72377	1.94291	NUP153;KPNA1
Base Excision Repair Homo sapiens R-HSA-73884	2/35	0.323962	0.933449	0	0	1.72377	1.94291	RFC1;PNKP
Resolution of Abasic Sites (AP sites) Homo sapiens R-HSA-73933	2/35	0.323962	0.931694	0	0	1.72377	1.94291	RFC1;PNKP
Bile acid and bile salt metabolism Homo sapiens R-HSA-194068	2/35	0.323962	0.929946	0	0	1.72377	1.94291	ABCC3;RXRA
Selenocysteine synthesis Homo sapiens R-HSA-2408557	4/87	0.326272	0.934825	0	0	1.38694	1.5534	RPS14;RPL35;SARS;UBA52
TP53 Regulates Transcription of DNA Repair Genes Homo sapiens R-HSA-6796648	3/61	0.32939	0.941993	0	0	1.48357	1.64752	SUPT16H;CDK12;CDK13
Cell-cell junction organization Homo sapiens R-HSA-421270	3/61	0.32939	0.940235	0	0	1.48357	1.64752	CDH6;PARD3;CLDN16
Reversible hydration of carbon dioxide Homo sapiens R-HSA-1475029	1/12	0.332793	0.948182	0	0	2.51383	2.7658	CA12
mRNA decay by 3' to 5' exoribonuclease Homo sapiens R-HSA-429958	1/12	0.332793	0.94642	0	0	2.51383	2.7658	EXOSC2
CD28 dependent Vav1 pathway Homo sapiens R-HSA-389359	1/12	0.332793	0.944664	0	0	2.51383	2.7658	PAK2
NOTCH2 intracellular domain regulates transcription Homo sapiens R-HSA-2197563	1/12	0.332793	0.942914	0	0	2.51383	2.7658	MAMLD1
NF-kB activation through FADD/RIP-1 pathway mediated by caspase-8 and -10 Homo sapiens R-HSA-933543	1/12	0.332793	0.941171	0	0	2.51383	2.7658	IKBKG
The NLRP3 inflammasome Homo sapiens R-HSA-844456	1/12	0.332793	0.939435	0	0	2.51383	2.7658	APP
Vitamin B5 (pantothenate) metabolism Homo sapiens R-HSA-199220	1/12	0.332793	0.937705	0	0	2.51383	2.7658	PANK2
Lysine catabolism Homo sapiens R-HSA-71064	1/12	0.332793	0.935981	0	0	2.51383	2.7658	OGDH
Metabolism of carbohydrates Homo sapiens R-HSA-71387	11/282	0.334042	0.937768	0	0	1.17668	1.29022	EXT1;VCAN;GALE;B4GALT1;HAS3;SLC2A1;NUP153;AGRN;HSPG2;UBA52;GAPDH
Regulation of TP53 Activity through Phosphorylation Homo sapiens R-HSA-6804756	4/89	0.341392	0.956648	0	0	1.35577	1.45708	SUPT16H;PRKAG2;HUS1;UBA52
HDR through Single Strand Annealing (SSA) Homo sapiens R-HSA-5685938	2/37	0.348368	0.974412	0	0	1.63059	1.71945	ABL1;HUS1
Translesion synthesis by Y family DNA polymerases bypasses lesions on DNA template Homo sapiens R-HSA-110313	2/37	0.348368	0.972634	0	0	1.63059	1.71945	RFC1;UBA52
Activation of ATR in response to replication stress Homo sapiens R-HSA-176187	2/37	0.348368	0.970862	0	0	1.63059	1.71945	HUS1;CLSPN
G2/M Transition Homo sapiens R-HSA-69275	7/173	0.350261	0.974362	0	0	1.22059	1.28049	CENPF;PPP1R12A;CEP131;TUBG1;UBA52;CDK5RAP2;SKP1
Facilitative Na+-independent glucose transporters Homo sapiens R-HSA-428790	1/13	0.354924	0.985543	0	0	2.32045	2.40364	SLC2A1
Dissolution of Fibrin Clot Homo sapiens R-HSA-75205	1/13	0.354924	0.983758	0	0	2.32045	2.40364	PLAUR
The activation of arylsulfatases Homo sapiens R-HSA-1663150	1/13	0.354924	0.981979	0	0	2.32045	2.40364	SUMF1
WNT5A-dependent internalization of FZD2, FZD5 and ROR2 Homo sapiens R-HSA-5140745	1/13	0.354924	0.980206	0	0	2.32045	2.40364	ROR1
POU5F1 (OCT4), SOX2, NANOG activate genes related to proliferation Homo sapiens R-HSA-2892247	1/13	0.354924	0.97844	0	0	2.32045	2.40364	SALL1
NICD traffics to nucleus Homo sapiens R-HSA-157052	1/13	0.354924	0.976681	0	0	2.32045	2.40364	MAMLD1
Notch-HLH transcription pathway Homo sapiens R-HSA-350054	1/13	0.354924	0.974927	0	0	2.32045	2.40364	MAMLD1
p75NTR recruits signalling complexes Homo sapiens R-HSA-209543	1/13	0.354924	0.97318	0	0	2.32045	2.40364	UBA52
NF-kB is activated and signals survival Homo sapiens R-HSA-209560	1/13	0.354924	0.971439	0	0	2.32045	2.40364	UBA52
Assembly Of The HIV Virion Homo sapiens R-HSA-175474	1/13	0.354924	0.969704	0	0	2.32045	2.40364	UBA52
Downregulation of ERBB2:ERBB3 signaling Homo sapiens R-HSA-1358803	1/13	0.354924	0.967976	0	0	2.32045	2.40364	UBA52
DEx/H-box helicases activate type I IFN and inflammatory cytokines production Homo sapiens R-HSA-3134963	1/13	0.354924	0.966253	0	0	2.32045	2.40364	APP
Advanced glycosylation endproduct receptor signaling Homo sapiens R-HSA-879415	1/13	0.354924	0.964537	0	0	2.32045	2.40364	APP
Signal regulatory protein (SIRP) family interactions Homo sapiens R-HSA-391160	1/13	0.354924	0.962827	0	0	2.32045	2.40364	SIRPA
Platelet Adhesion to exposed collagen Homo sapiens R-HSA-75892	1/13	0.354924	0.961123	0	0	2.32045	2.40364	ITGB1
Signaling by Activin Homo sapiens R-HSA-1502540	1/13	0.354924	0.959425	0	0	2.32045	2.40364	SMAD3
PCP/CE pathway Homo sapiens R-HSA-4086400	4/91	0.356531	0.962067	0	0	1.32597	1.36752	SMURF2;PRKCA;ROR1;UBA52
RNA Polymerase II Pre-transcription Events Homo sapiens R-HSA-674695	3/64	0.356769	0.961015	0	0	1.41403	1.45739	SUPT16H;NCBP1;NCBP2
DNA Damage Recognition in GG-NER Homo sapiens R-HSA-5696394	2/38	0.360462	0.969256	0	0	1.58768	1.62002	UBA52;ACTB
G1 Phase Homo sapiens R-HSA-69236	2/38	0.360462	0.967555	0	0	1.58768	1.62002	UBA52;SKP1
Cyclin D associated events in G1 Homo sapiens R-HSA-69231	2/38	0.360462	0.965861	0	0	1.58768	1.62002	UBA52;SKP1
Signaling by FGFR1 in disease Homo sapiens R-HSA-5655302	2/38	0.360462	0.964172	0	0	1.58768	1.62002	MYO18A;GAB1
Glutathione conjugation Homo sapiens R-HSA-156590	2/38	0.360462	0.96249	0	0	1.58768	1.62002	MGST3;CHAC1
Mitotic G2-G2/M phases Homo sapiens R-HSA-453274	7/175	0.361084	0.962471	0	0	1.20664	1.22913	CENPF;PPP1R12A;CEP131;TUBG1;UBA52;CDK5RAP2;SKP1
Influenza Infection Homo sapiens R-HSA-168254	6/147	0.361273	0.961302	0	0	1.23126	1.25357	RPS14;CANX;RPL35;NUP153;UBA52;KPNA1
Metabolism of proteins Homo sapiens R-HSA-392499	38/1074	0.361706	0.960783	0	0	1.06732	1.08538	TOP2A;APP;SPON1;B4GALT1;GCNT1;THSD4;ACTB;RPS14;FUT8;SUMO1;GNG7;MGAT5;GRPEL2;RPL35;THSD7A;SEC62;ADAMTS9;EXOSC2;SPTAN1;SPTBN1;SPTBN2;HSPA9;EIF5B;TBCD;PLAUR;NUP153;EEF2;RANGAP1;HSPG2;SUMF1;EEF1A1;STAG1;INCENP;CANX;TOP1;SAE1;UBA52;ST6GALNAC5
Gamma carboxylation, hypusine formation and arylsulfatase activation Homo sapiens R-HSA-163841	2/39	0.372471	0.987662	0	0	1.54697	1.52778	EEF2;SUMF1
mTOR signalling Homo sapiens R-HSA-165159	2/39	0.372471	0.985953	0	0	1.54697	1.52778	PRKAG2;TSC1
NS1 Mediated Effects on Host Pathways Homo sapiens R-HSA-168276	2/39	0.372471	0.98425	0	0	1.54697	1.52778	NUP153;KPNA1
Dual Incision in GG-NER Homo sapiens R-HSA-5696400	2/39	0.372471	0.982553	0	0	1.54697	1.52778	RFC1;UBA52
Nuclear signaling by ERBB4 Homo sapiens R-HSA-1251985	2/39	0.372471	0.980862	0	0	1.54697	1.52778	SKP1;EREG
GABA B receptor activation Homo sapiens R-HSA-977444	2/39	0.372471	0.979177	0	0	1.54697	1.52778	GNG7;KCNJ16
Activation of GABAB receptors Homo sapiens R-HSA-991365	2/39	0.372471	0.977497	0	0	1.54697	1.52778	GNG7;KCNJ16
Activation of NF-kappaB in B cells Homo sapiens R-HSA-1169091	3/66	0.374943	0.982298	0	0	1.37118	1.3451	IKBKG;UBA52;SKP1
Cytosolic sensors of pathogen-associated DNA Homo sapiens R-HSA-1834949	3/66	0.374943	0.980619	0	0	1.37118	1.3451	APP;IKBKG;UBA52
CS/DS degradation Homo sapiens R-HSA-2024101	1/14	0.376323	0.982549	0	0	2.15471	2.10581	VCAN
SUMOylation of transcription factors Homo sapiens R-HSA-3232118	1/14	0.376323	0.980875	0	0	2.15471	2.10581	SUMO1
Early Phase of HIV Life Cycle Homo sapiens R-HSA-162594	1/14	0.376323	0.979207	0	0	2.15471	2.10581	KPNA1
Polymerase switching on the C-strand of the telomere Homo sapiens R-HSA-174411	1/14	0.376323	0.977544	0	0	2.15471	2.10581	RFC1
Polymerase switching Homo sapiens R-HSA-69091	1/14	0.376323	0.975887	0	0	2.15471	2.10581	RFC1
Leading Strand Synthesis Homo sapiens R-HSA-69109	1/14	0.376323	0.974236	0	0	2.15471	2.10581	RFC1
Regulation of IFNG signaling Homo sapiens R-HSA-877312	1/14	0.376323	0.97259	0	0	2.15471	2.10581	SUMO1
SEMA3A-Plexin repulsion signaling by inhibiting Integrin adhesion Homo sapiens R-HSA-399955	1/14	0.376323	0.97095	0	0	2.15471	2.10581	NRP1
Activation of Rac Homo sapiens R-HSA-428540	1/14	0.376323	0.969316	0	0	2.15471	2.10581	PAK2
Synthesis of PIPs at the early endosome membrane Homo sapiens R-HSA-1660516	1/14	0.376323	0.967687	0	0	2.15471	2.10581	INPP4A
Nicotinate metabolism Homo sapiens R-HSA-196807	1/14	0.376323	0.966063	0	0	2.15471	2.10581	NMNAT2
Glutathione synthesis and recycling Homo sapiens R-HSA-174403	1/14	0.376323	0.964445	0	0	2.15471	2.10581	CHAC1
Regulation of pyruvate dehydrogenase (PDH) complex Homo sapiens R-HSA-204174	1/14	0.376323	0.962832	0	0	2.15471	2.10581	RXRA
G2/M Checkpoints Homo sapiens R-HSA-69481	6/150	0.379073	0.968249	0	0	1.20664	1.17047	SUMO1;BRE;HUS1;CLSPN;WHSC1;UBA52
Macroautophagy Homo sapiens R-HSA-1632852	3/67	0.383992	0.97918	0	0	1.35071	1.29281	PRKAG2;TSC1;CHMP6
Transcription of the HIV genome Homo sapiens R-HSA-167172	3/67	0.383992	0.977551	0	0	1.35071	1.29281	SUPT16H;NCBP1;NCBP2
PKB-mediated events Homo sapiens R-HSA-109703	2/40	0.384388	0.976933	0	0	1.5083	1.44208	PRKAG2;TSC1
Negative regulation of MAPK pathway Homo sapiens R-HSA-5675221	2/40	0.384388	0.975313	0	0	1.5083	1.44208	DUSP10;UBA52
Transcriptional activation of mitochondrial biogenesis Homo sapiens R-HSA-2151201	2/40	0.384388	0.973699	0	0	1.5083	1.44208	RXRA;CHD9
Translation Homo sapiens R-HSA-72766	6/151	0.38501	0.973662	0	0	1.19865	1.14409	EEF1A1;RPS14;EIF5B;RPL35;EEF2;UBA52
Amyloid fiber formation Homo sapiens R-HSA-977225	3/68	0.393011	0.992257	0	0	1.33085	1.2429	APP;HSPG2;UBA52
Elastic fibre formation Homo sapiens R-HSA-1566948	2/41	0.396206	0.998674	0	0	1.47151	1.36235	ITGB1;LTBP2
Host Interactions with Influenza Factors Homo sapiens R-HSA-168253	2/41	0.396206	0.997032	0	0	1.47151	1.36235	NUP153;KPNA1
Depolymerisation of the Nuclear Lamina Homo sapiens R-HSA-4419969	1/15	0.397012	0.997419	0	0	2.01106	1.8578	PRKCA
WNT5A-dependent internalization of FZD4 Homo sapiens R-HSA-5099900	1/15	0.397012	0.995784	0	0	2.01106	1.8578	PRKCA
Calnexin/calreticulin cycle Homo sapiens R-HSA-901042	1/15	0.397012	0.994154	0	0	2.01106	1.8578	CANX
mRNA decay by 5' to 3' exoribonuclease Homo sapiens R-HSA-430039	1/15	0.397012	0.99253	0	0	2.01106	1.8578	DCP1A
Regulation of innate immune responses to cytosolic DNA Homo sapiens R-HSA-3134975	1/15	0.397012	0.990911	0	0	2.01106	1.8578	UBA52
Association of licensing factors with the pre-replicative complex Homo sapiens R-HSA-69298	1/15	0.397012	0.989297	0	0	2.01106	1.8578	UBA52
Prolactin receptor signaling Homo sapiens R-HSA-1170546	1/15	0.397012	0.987688	0	0	2.01106	1.8578	SKP1
NRIF signals cell death from the nucleus Homo sapiens R-HSA-205043	1/15	0.397012	0.986085	0	0	2.01106	1.8578	UBA52
Glycogen synthesis Homo sapiens R-HSA-3322077	1/15	0.397012	0.984487	0	0	2.01106	1.8578	UBA52
Negative regulation of TCF-dependent signaling by WNT ligand antagonists Homo sapiens R-HSA-3772470	1/15	0.397012	0.982894	0	0	2.01106	1.8578	LRP5
Elevation of cytosolic Ca2+ levels Homo sapiens R-HSA-139853	1/15	0.397012	0.981306	0	0	2.01106	1.8578	ITPR3
Synthesis of bile acids and bile salts via 27-hydroxycholesterol Homo sapiens R-HSA-193807	1/15	0.397012	0.979723	0	0	2.01106	1.8578	RXRA
Cell Cycle Checkpoints Homo sapiens R-HSA-69620	7/182	0.399119	0.983337	0	0	1.16023	1.06566	SUMO1;BRE;HUS1;CLSPN;WHSC1;UBA52;MAD1L1
Anchoring of the basal body to the plasma membrane Homo sapiens R-HSA-5620912	4/97	0.401834	0.988435	0	0	1.24396	1.13413	C2CD3;CEP131;TUBG1;CDK5RAP2
Loss of Nlp from mitotic centrosomes Homo sapiens R-HSA-380259	3/69	0.401996	0.987246	0	0	1.31156	1.19524	CEP131;TUBG1;CDK5RAP2
Loss of proteins required for interphase microtubule organization?from the centrosome Homo sapiens R-HSA-380284	3/69	0.401996	0.985664	0	0	1.31156	1.19524	CEP131;TUBG1;CDK5RAP2
Cytokine Signaling in Immune system Homo sapiens R-HSA-1280215	22/620	0.402275	0.984769	0	0	1.0704	0.974731	IRS1;DAB2IP;IRS2;NUP153;RASAL2;PIK3CB;EGFR;EREG;EDAR;DUSP10;SUMO1;IL3RA;NF1;FLNB;IKBKG;UBA52;SPTAN1;SPTBN1;VCL;KPNA1;SKP1;SPTBN2
Retinoid metabolism and transport Homo sapiens R-HSA-975634	2/42	0.407918	0.996989	0	0	1.43647	1.28807	AGRN;HSPG2
Glucose transport Homo sapiens R-HSA-70153	2/42	0.407918	0.995399	0	0	1.43647	1.28807	SLC2A1;NUP153
Glucagon-like Peptide-1 (GLP1) regulates insulin secretion Homo sapiens R-HSA-381676	2/42	0.407918	0.993814	0	0	1.43647	1.28807	GNG7;ITPR3
Activation of gene expression by SREBF (SREBP) Homo sapiens R-HSA-2426168	2/42	0.407918	0.992234	0	0	1.43647	1.28807	RXRA;CHD9
p75NTR signals via NF-kB Homo sapiens R-HSA-193639	1/16	0.417016	1	0	0	1.88537	1.649	UBA52
TRAF6 mediated induction of TAK1 complex Homo sapiens R-HSA-937072	1/16	0.417016	1	0	0	1.88537	1.649	UBA52
Spry regulation of FGF signaling Homo sapiens R-HSA-1295596	1/16	0.417016	1	0	0	1.88537	1.649	UBA52
Polo-like kinase mediated events Homo sapiens R-HSA-156711	1/16	0.417016	1	0	0	1.88537	1.649	CENPF
Regulation of KIT signaling Homo sapiens R-HSA-1433559	1/16	0.417016	1	0	0	1.88537	1.649	PRKCA
CRMPs in Sema3A signaling Homo sapiens R-HSA-399956	1/16	0.417016	1	0	0	1.88537	1.649	NRP1
RHO GTPases activate CIT Homo sapiens R-HSA-5625900	1/16	0.417016	1	0	0	1.88537	1.649	MYH10
Vasopressin regulates renal water homeostasis via Aquaporins Homo sapiens R-HSA-432040	2/43	0.419519	1	0	0	1.40307	1.21877	GNG7;MYO5B
AURKA Activation by TPX2 Homo sapiens R-HSA-8854518	3/72	0.428707	1	0	0	1.25691	1.06458	CEP131;TUBG1;CDK5RAP2
Phospholipase C-mediated cascade; FGFR3 Homo sapiens R-HSA-5654227	2/44	0.431002	1	0	0	1.37118	1.15404	ITPR3;PRKCA
Inositol phosphate metabolism Homo sapiens R-HSA-1483249	2/44	0.431002	1	0	0	1.37118	1.15404	INPP4A;PLCB4
Zinc transporters Homo sapiens R-HSA-435354	1/17	0.436357	1	0	0	1.77447	1.47155	SLC39A10
Hyaluronan metabolism Homo sapiens R-HSA-2142845	1/17	0.436357	1	0	0	1.77447	1.47155	HAS3
Trafficking of GluR2-containing AMPA receptors Homo sapiens R-HSA-416993	1/17	0.436357	1	0	0	1.77447	1.47155	PRKCA
N-glycan trimming in the ER and Calnexin/Calreticulin cycle Homo sapiens R-HSA-532668	1/17	0.436357	1	0	0	1.77447	1.47155	CANX
KSRP (KHSRP) binds and destabilizes mRNA Homo sapiens R-HSA-450604	1/17	0.436357	1	0	0	1.77447	1.47155	EXOSC2
Digestion of dietary lipid Homo sapiens R-HSA-192456	1/17	0.436357	1	0	0	1.77447	1.47155	LIPC
Inflammasomes Homo sapiens R-HSA-622312	1/17	0.436357	1	0	0	1.77447	1.47155	APP
Mitochondrial Fatty Acid Beta-Oxidation Homo sapiens R-HSA-77289	1/17	0.436357	1	0	0	1.77447	1.47155	HADHA
NoRC negatively regulates rRNA expression Homo sapiens R-HSA-427413	3/73	0.437518	1	0	0	1.2397	1.02478	SAP30BP;SIN3A;UBTF
ABC-family proteins mediated transport Homo sapiens R-HSA-382556	2/45	0.442363	1	0	0	1.34071	1.09351	ABCC3;ABCC4
SUMOylation of RNA binding proteins Homo sapiens R-HSA-4570464	2/45	0.442363	1	0	0	1.34071	1.09351	SUMO1;NUP153
Diseases of metabolism Homo sapiens R-HSA-5668914	2/45	0.442363	1	0	0	1.34071	1.09351	UBA52;MMADHC
Transport to the Golgi and subsequent modification Homo sapiens R-HSA-948021	6/162	0.450044	1	0	0	1.11726	0.892028	FUT8;B4GALT1;MGAT5;SPTAN1;SPTBN1;SPTBN2
Phospholipase C-mediated cascade; FGFR4 Homo sapiens R-HSA-5654228	2/46	0.453598	1	0	0	1.31156	1.03685	ITPR3;PRKCA
SUMOylation of DNA damage response and repair proteins Homo sapiens R-HSA-3108214	3/75	0.454981	1	0	0	1.20664	0.950227	STAG1;SUMO1;NUP153
Pre-NOTCH Processing in Golgi Homo sapiens R-HSA-1912420	1/18	0.455058	1	0	0	1.67588	1.31947	B4GALT1
Oxygen-dependent proline hydroxylation of Hypoxia-inducible Factor Alpha Homo sapiens R-HSA-1234176	1/18	0.455058	1	0	0	1.67588	1.31947	UBA52
Signaling by cytosolic FGFR1 fusion mutants Homo sapiens R-HSA-1839117	1/18	0.455058	1	0	0	1.67588	1.31947	MYO18A
Tie2 Signaling Homo sapiens R-HSA-210993	1/18	0.455058	1	0	0	1.67588	1.31947	PIK3CB
Activation of IRF3/IRF7 mediated by TBK1/IKK epsilon Homo sapiens R-HSA-936964	1/18	0.455058	1	0	0	1.67588	1.31947	UBA52
Regulation of signaling by CBL Homo sapiens R-HSA-912631	1/18	0.455058	1	0	0	1.67588	1.31947	PIK3CB
cGMP effects Homo sapiens R-HSA-418457	1/18	0.455058	1	0	0	1.67588	1.31947	PDE9A
Defects in vitamin and cofactor metabolism Homo sapiens R-HSA-3296482	1/18	0.455058	1	0	0	1.67588	1.31947	MMADHC
Negative epigenetic regulation of rRNA expression Homo sapiens R-HSA-5250941	3/76	0.463627	1	0	0	1.19076	0.915308	SAP30BP;SIN3A;UBTF
RNA Polymerase I Transcription Initiation Homo sapiens R-HSA-73762	2/47	0.464701	1	0	0	1.28366	0.983743	MBD3;UBTF
Phospholipase C-mediated cascade: FGFR1 Homo sapiens R-HSA-5654219	2/47	0.464701	1	0	0	1.28366	0.983743	ITPR3;PRKCA
Signaling by Hedgehog Homo sapiens R-HSA-5358351	5/136	0.471423	1	0	0	1.10904	0.833998	ITCH;SMURF2;P4HB;UBA52;SKP1
Regulation of TP53 Activity through Methylation Homo sapiens R-HSA-6804760	1/19	0.473139	1	0	0	1.58768	1.18817	UBA52
PCNA-Dependent Long Patch Base Excision Repair Homo sapiens R-HSA-5651801	1/19	0.473139	1	0	0	1.58768	1.18817	RFC1
Prostacyclin signalling through prostacyclin receptor Homo sapiens R-HSA-392851	1/19	0.473139	1	0	0	1.58768	1.18817	GNG7
Signaling by NODAL Homo sapiens R-HSA-1181150	1/19	0.473139	1	0	0	1.58768	1.18817	SMAD3
Hexose transport Homo sapiens R-HSA-189200	2/48	0.475671	1	0	0	1.25691	0.933923	SLC2A1;NUP153
GTP hydrolysis and joining of the 60S ribosomal subunit Homo sapiens R-HSA-72706	4/107	0.475758	1	0	0	1.1277	0.837706	RPS14;EIF5B;RPL35;UBA52
COPI-mediated anterograde transport Homo sapiens R-HSA-6807878	3/78	0.480735	1	0	0	1.16023	0.849795	SPTAN1;SPTBN1;SPTBN2
Amino acid and oligopeptide SLC transporters Homo sapiens R-HSA-425374	2/49	0.486502	1	0	0	1.23126	0.887141	SLC38A1;SLC7A11
Regulation of activated PAK-2p34 by proteasome mediated degradation Homo sapiens R-HSA-211733	2/49	0.486502	1	0	0	1.23126	0.887141	UBA52;PAK2
Phospholipase C-mediated cascade; FGFR2 Homo sapiens R-HSA-5654221	2/49	0.486502	1	0	0	1.23126	0.887141	PRKCA;ITPR3
Centrosome maturation Homo sapiens R-HSA-380287	3/79	0.489193	1	0	0	1.14554	0.819061	CEP131;TUBG1;CDK5RAP2
Recruitment of mitotic centrosome proteins and complexes Homo sapiens R-HSA-380270	3/79	0.489193	1	0	0	1.14554	0.819061	CEP131;TUBG1;CDK5RAP2
Chondroitin sulfate biosynthesis Homo sapiens R-HSA-2022870	1/20	0.490621	1	0	0	1.5083	1.07403	VCAN
Lagging Strand Synthesis Homo sapiens R-HSA-69186	1/20	0.490621	1	0	0	1.5083	1.07403	RFC1
G beta:gamma signalling through PLC beta Homo sapiens R-HSA-418217	1/20	0.490621	1	0	0	1.5083	1.07403	GNG7
Hormone-sensitive lipase (HSL)-mediated triacylglycerol hydrolysis Homo sapiens R-HSA-163560	1/20	0.490621	1	0	0	1.5083	1.07403	MGLL
Regulation of Apoptosis Homo sapiens R-HSA-169911	2/50	0.497193	1	0	0	1.20664	0.84317	UBA52;PAK2
Golgi-to-ER retrograde transport Homo sapiens R-HSA-8856688	4/110	0.497283	1	0	0	1.09694	0.76632	KIF20A;KLC1;BICD1;KIF15
FCERI mediated NF-kB activation Homo sapiens R-HSA-2871837	4/111	0.504374	1	0	0	1.08706	0.744024	CDC34;IKBKG;UBA52;SKP1
COPI-dependent Golgi-to-ER retrograde traffic Homo sapiens R-HSA-6811434	3/81	0.505901	1	0	0	1.11726	0.761313	KIF20A;KLC1;KIF15
TP53 regulates transcription of additional cell cycle genes whose exact role in the p53 pathway remain uncertain Homo sapiens R-HSA-6804115	1/21	0.507524	1	0	0	1.43647	0.974232	CNOT10
Mitotic Spindle Checkpoint Homo sapiens R-HSA-69618	1/21	0.507524	1	0	0	1.43647	0.974232	MAD1L1
ERK/MAPK targets Homo sapiens R-HSA-198753	1/21	0.507524	1	0	0	1.43647	0.974232	RPS6KA2
CD209 (DC-SIGN) signaling Homo sapiens R-HSA-5621575	1/21	0.507524	1	0	0	1.43647	0.974232	PAK2
Presynaptic function of Kainate receptors Homo sapiens R-HSA-500657	1/21	0.507524	1	0	0	1.43647	0.974232	GNG7
Cobalamin (Cbl, vitamin B12) transport and metabolism Homo sapiens R-HSA-196741	1/21	0.507524	1	0	0	1.43647	0.974232	MMADHC
Aflatoxin activation and detoxification Homo sapiens R-HSA-5423646	1/21	0.507524	1	0	0	1.43647	0.974232	MGST3
Metabolism of fat-soluble vitamins Homo sapiens R-HSA-6806667	2/51	0.507741	1	0	0	1.18298	0.801803	AGRN;HSPG2
Vpu mediated degradation of CD4 Homo sapiens R-HSA-180534	2/51	0.507741	1	0	0	1.18298	0.801803	UBA52;SKP1
Aquaporin-mediated transport Homo sapiens R-HSA-445717	2/51	0.507741	1	0	0	1.18298	0.801803	GNG7;MYO5B
Ion homeostasis Homo sapiens R-HSA-5578775	2/51	0.507741	1	0	0	1.18298	0.801803	ASPH;ITPR3
Signaling by Wnt Homo sapiens R-HSA-195721	10/295	0.516562	1	0	0	1.02257	0.67547	SMURF2;GNG7;LRP5;PRKCA;ROR1;ITPR3;PDE6A;UBA52;LGR4;SKP1
Organelle biogenesis and maintenance Homo sapiens R-HSA-1852241	11/326	0.519303	1	0	0	1.01787	0.666976	RXRA;C2CD3;CHD9;ARL3;CEP131;PRKAG2;TRIP11;ASAP1;TUBG1;RAB11FIP3;CDK5RAP2
RA biosynthesis pathway Homo sapiens R-HSA-5365859	1/22	0.523866	1	0	0	1.37118	0.886492	ALDH1A2
CD28 dependent PI3K/Akt signaling Homo sapiens R-HSA-389357	1/22	0.523866	1	0	0	1.37118	0.886492	TRIB3
Resolution of AP sites via the multiple-nucleotide patch replacement pathway Homo sapiens R-HSA-110373	1/22	0.523866	1	0	0	1.37118	0.886492	RFC1
Telomere C-strand (Lagging Strand) Synthesis Homo sapiens R-HSA-174417	1/22	0.523866	1	0	0	1.37118	0.886492	RFC1
Pink/Parkin Mediated Mitophagy Homo sapiens R-HSA-5205685	1/22	0.523866	1	0	0	1.37118	0.886492	UBA52
Mitophagy Homo sapiens R-HSA-5205647	1/22	0.523866	1	0	0	1.37118	0.886492	UBA52
Signaling by FGFR3 point mutants in cancer Homo sapiens R-HSA-8853338	1/22	0.523866	1	0	0	1.37118	0.886492	GAB1
Signaling by FGFR3 in disease Homo sapiens R-HSA-5655332	1/22	0.523866	1	0	0	1.37118	0.886492	GAB1
Post-chaperonin tubulin folding pathway Homo sapiens R-HSA-389977	1/22	0.523866	1	0	0	1.37118	0.886492	TBCD
ADP signalling through P2Y purinoceptor 12 Homo sapiens R-HSA-392170	1/22	0.523866	1	0	0	1.37118	0.886492	GNG7
Cap-dependent Translation Initiation Homo sapiens R-HSA-72737	4/114	0.525375	1	0	0	1.05845	0.681265	RPS14;EIF5B;RPL35;UBA52
Eukaryotic Translation Initiation Homo sapiens R-HSA-72613	4/114	0.525375	1	0	0	1.05845	0.681265	RPS14;EIF5B;RPL35;UBA52
GPVI-mediated activation cascade Homo sapiens R-HSA-114604	2/53	0.528397	1	0	0	1.13834	0.726153	IL3RA;PIK3CB
Membrane Trafficking Homo sapiens R-HSA-199991	14/420	0.530053	1	0	0	1.00553	0.638288	APP;PRKAG2;KLC1;BICD1;KIF15;GOLGA4;TRIP11;AP3S1;KIF20A;CHMP6;UBA52;SPTAN1;SPTBN1;SPTBN2
Viral mRNA Translation Homo sapiens R-HSA-192823	3/84	0.53042	1	0	0	1.07735	0.683135	RPS14;RPL35;UBA52
Collagen formation Homo sapiens R-HSA-1474290	3/85	0.53844	1	0	0	1.06468	0.65912	PLOD1;P4HB;PLEC
Hedgehog 'on' state Homo sapiens R-HSA-5632684	3/85	0.53844	1	0	0	1.06468	0.65912	ITCH;SMURF2;UBA52
SCF-beta-TrCP mediated degradation of Emi1 Homo sapiens R-HSA-174113	2/54	0.538503	1	0	0	1.11726	0.69154	UBA52;SKP1
Degradation of AXIN Homo sapiens R-HSA-4641257	2/54	0.538503	1	0	0	1.11726	0.69154	SMURF2;UBA52
Mitochondrial protein import Homo sapiens R-HSA-1268020	2/54	0.538503	1	0	0	1.11726	0.69154	HSPA9;GRPEL2
Deadenylation of mRNA Homo sapiens R-HSA-429947	1/23	0.539668	1	0	0	1.31156	0.808973	CNOT10
Regulation of TP53 Activity through Acetylation Homo sapiens R-HSA-6804758	1/23	0.539668	1	0	0	1.31156	0.808973	MBD3
RNA Polymerase III Transcription Termination Homo sapiens R-HSA-73980	1/23	0.539668	1	0	0	1.31156	0.808973	NFIB
RAF-independent MAPK1/3 activation Homo sapiens R-HSA-112409	1/23	0.539668	1	0	0	1.31156	0.808973	DUSP10
APC/C:Cdc20 mediated degradation of Cyclin B Homo sapiens R-HSA-174048	1/23	0.539668	1	0	0	1.31156	0.808973	UBA52
Signaling by BMP Homo sapiens R-HSA-201451	1/23	0.539668	1	0	0	1.31156	0.808973	SMURF2
Intra-Golgi and retrograde Golgi-to-ER traffic Homo sapiens R-HSA-6811442	6/179	0.546865	1	0	0	1.01115	0.610282	GOLGA4;TRIP11;KIF20A;KLC1;BICD1;KIF15
GABA receptor activation Homo sapiens R-HSA-977443	2/55	0.548458	1	0	0	1.09694	0.658873	GNG7;KCNJ16
Regulation of cholesterol biosynthesis by SREBP (SREBF) Homo sapiens R-HSA-1655829	2/55	0.548458	1	0	0	1.09694	0.658873	RXRA;CHD9
Eukaryotic Translation Termination Homo sapiens R-HSA-72764	3/87	0.554243	1	0	0	1.0402	0.613879	RPS14;RPL35;UBA52
Platelet homeostasis Homo sapiens R-HSA-418346	3/87	0.554243	1	0	0	1.0402	0.613879	GNG7;ITPR3;PDE9A
TNFs bind their physiological receptors Homo sapiens R-HSA-5669034	1/24	0.554945	1	0	0	1.25691	0.740178	EDAR
Phosphorylation of CD3 and TCR zeta chains Homo sapiens R-HSA-202427	1/24	0.554945	1	0	0	1.25691	0.740178	PTPRJ
Diseases associated with the TLR signaling cascade Homo sapiens R-HSA-5602358	1/24	0.554945	1	0	0	1.25691	0.740178	IKBKG
Diseases of Immune System Homo sapiens R-HSA-5260271	1/24	0.554945	1	0	0	1.25691	0.740178	IKBKG
Nuclear Events (kinase and transcription factor activation) Homo sapiens R-HSA-198725	1/24	0.554945	1	0	0	1.25691	0.740178	RPS6KA2
Sema4D induced cell migration and growth-cone collapse Homo sapiens R-HSA-416572	1/24	0.554945	1	0	0	1.25691	0.740178	MYH10
Synthesis of bile acids and bile salts via 7alpha-hydroxycholesterol Homo sapiens R-HSA-193368	1/24	0.554945	1	0	0	1.25691	0.740178	RXRA
Endogenous sterols Homo sapiens R-HSA-211976	1/24	0.554945	1	0	0	1.25691	0.740178	RXRA
Cytosolic tRNA aminoacylation Homo sapiens R-HSA-379716	1/24	0.554945	1	0	0	1.25691	0.740178	SARS
Respiratory electron transport Homo sapiens R-HSA-611105	3/88	0.562022	1	0	0	1.02838	0.592569	UQCR11;SDHA;NDUFV2
Regulation of TP53 Activity Homo sapiens R-HSA-5633007	5/151	0.564129	1	0	0	0.998871	0.571826	MBD3;SUPT16H;HUS1;PRKAG2;UBA52
Pre-NOTCH Expression and Processing Homo sapiens R-HSA-1912422	2/57	0.567911	1	0	0	1.05845	0.598862	B4GALT1;MAMLD1
Metal ion SLC transporters Homo sapiens R-HSA-425410	1/25	0.569716	1	0	0	1.20664	0.678874	SLC39A10
Post-translational modification: synthesis of GPI-anchored proteins Homo sapiens R-HSA-163125	1/25	0.569716	1	0	0	1.20664	0.678874	PLAUR
Antigen Presentation: Folding, assembly and peptide loading of class I MHC Homo sapiens R-HSA-983170	1/25	0.569716	1	0	0	1.20664	0.678874	CANX
ATF4 activates genes Homo sapiens R-HSA-380994	1/25	0.569716	1	0	0	1.20664	0.678874	EXOSC2
HDMs demethylate histones Homo sapiens R-HSA-3214842	1/25	0.569716	1	0	0	1.20664	0.678874	KDM5A
APC-Cdc20 mediated degradation of Nek2A Homo sapiens R-HSA-179409	1/25	0.569716	1	0	0	1.20664	0.678874	UBA52
Nitric oxide stimulates guanylate cyclase Homo sapiens R-HSA-392154	1/25	0.569716	1	0	0	1.20664	0.678874	PDE9A
Synthesis of IP3 and IP4 in the cytosol Homo sapiens R-HSA-1855204	1/25	0.569716	1	0	0	1.20664	0.678874	PLCB4
Sulfur amino acid metabolism Homo sapiens R-HSA-1614635	1/25	0.569716	1	0	0	1.20664	0.678874	CBS
Glyoxylate metabolism and glycine degradation Homo sapiens R-HSA-389661	1/25	0.569716	1	0	0	1.20664	0.678874	OGDH
The citric acid (TCA) cycle and respiratory electron transport Homo sapiens R-HSA-1428517	5/153	0.575869	1	0	0	0.985814	0.544046	RXRA;OGDH;UQCR11;SDHA;NDUFV2
rRNA modification in the nucleus Homo sapiens R-HSA-6790901	2/58	0.577409	1	0	0	1.0402	0.571285	RPS14;SNORD3A
NIK-->noncanonical NF-kB signaling Homo sapiens R-HSA-5676590	2/58	0.577409	1	0	0	1.0402	0.571285	UBA52;SKP1
Gene Expression Homo sapiens R-HSA-74160	53/1631	0.582483	1	0	0	0.980253	0.529784	THRB;CHD9;PRKAG2;ELAVL1;ACTB;CCAR1;RPS14;MED13;SIN3A;UBTF;RPL35;ZNF205;TEAD1;RNF111;EIF5B;SAP30BP;SUPT16H;NCBP1;ZNF282;NCBP2;HUS1;SARS;PRKCA;TSC1;THOC2;BAZ1B;NCOR2;EEF1A1;ZC3H11A;RARA;SNRPF;UBA52;UHRF1;DDX23;NEDD4L;SNORD3A;RXRA;U2AF2;DHX38;EXOSC2;MBD3;SMAD3;SMURF2;CNOT10;NUP153;DEK;EEF2;NR2F6;NFIB;CDK12;CDK13;DCP1A;MAMLD1
Regulation of Hypoxia-inducible Factor (HIF) by oxygen Homo sapiens R-HSA-1234174	1/26	0.583998	1	0	0	1.16023	0.624037	UBA52
Cellular response to hypoxia Homo sapiens R-HSA-2262749	1/26	0.583998	1	0	0	1.16023	0.624037	UBA52
CaM pathway Homo sapiens R-HSA-111997	1/26	0.583998	1	0	0	1.16023	0.624037	PRKCA
Calmodulin induced events Homo sapiens R-HSA-111933	1/26	0.583998	1	0	0	1.16023	0.624037	PRKCA
Phase 2 - plateau phase Homo sapiens R-HSA-5576893	1/26	0.583998	1	0	0	1.16023	0.624037	KCNQ1
Insulin receptor recycling Homo sapiens R-HSA-77387	1/26	0.583998	1	0	0	1.16023	0.624037	ATP6V1A
GLI3 is processed to GLI3R by the proteasome Homo sapiens R-HSA-5610785	2/59	0.586752	1	0	0	1.02257	0.545187	UBA52;SKP1
Degradation of GLI2 by the proteasome Homo sapiens R-HSA-5610783	2/59	0.586752	1	0	0	1.02257	0.545187	UBA52;SKP1
SCF(Skp2)-mediated degradation of p27/p21 Homo sapiens R-HSA-187577	2/59	0.586752	1	0	0	1.02257	0.545187	UBA52;SKP1
S Phase Homo sapiens R-HSA-69242	4/124	0.592037	1	0	0	0.973094	0.510082	STAG1;RFC1;UBA52;SKP1
MAPK6/MAPK4 signaling Homo sapiens R-HSA-5687128	3/92	0.5923	1	0	0	0.983671	0.515191	UBA52;KALRN;PAK2
RHO GTPases activate PKNs Homo sapiens R-HSA-5625740	2/60	0.595942	1	0	0	1.00553	0.520474	PPP1R12A;MYH10
HDACs deacetylate histones Homo sapiens R-HSA-3214815	2/60	0.595942	1	0	0	1.00553	0.520474	NCOR2;MBD3
Role of phospholipids in phagocytosis Homo sapiens R-HSA-2029485	2/60	0.595942	1	0	0	1.00553	0.520474	ITPR3;PIK3CB
PI Metabolism Homo sapiens R-HSA-1483255	2/60	0.595942	1	0	0	1.00553	0.520474	INPP4A;PIK3CB
Keratan sulfate biosynthesis Homo sapiens R-HSA-2022854	1/27	0.597807	1	0	0	1.11726	0.574815	B4GALT1
Prefoldin mediated transfer of substrate to CCT/TriC Homo sapiens R-HSA-389957	1/27	0.597807	1	0	0	1.11726	0.574815	ACTB
CREB phosphorylation through the activation of Ras Homo sapiens R-HSA-442742	1/27	0.597807	1	0	0	1.11726	0.574815	RPS6KA2
Platelet calcium homeostasis Homo sapiens R-HSA-418360	1/27	0.597807	1	0	0	1.11726	0.574815	ITPR3
Phase 1 - inactivation of fast Na+ channels Homo sapiens R-HSA-5576894	1/27	0.597807	1	0	0	1.11726	0.574815	KCNIP1
Synthesis of bile acids and bile salts Homo sapiens R-HSA-192105	1/27	0.597807	1	0	0	1.11726	0.574815	RXRA
Pyruvate metabolism Homo sapiens R-HSA-70268	1/27	0.597807	1	0	0	1.11726	0.574815	RXRA
Dectin-1 mediated noncanonical NF-kB signaling Homo sapiens R-HSA-5607761	2/61	0.604978	1	0	0	0.989046	0.497059	UBA52;SKP1
The role of Nef in HIV-1 replication and disease pathogenesis Homo sapiens R-HSA-164952	1/28	0.611157	1	0	0	1.07735	0.53049	PAK2
PERK regulates gene expression Homo sapiens R-HSA-381042	1/28	0.611157	1	0	0	1.07735	0.53049	EXOSC2
Extension of Telomeres Homo sapiens R-HSA-180786	1/28	0.611157	1	0	0	1.07735	0.53049	RFC1
G-protein activation Homo sapiens R-HSA-202040	1/28	0.611157	1	0	0	1.07735	0.53049	GNG7
Adrenaline,noradrenaline inhibits insulin secretion Homo sapiens R-HSA-400042	1/28	0.611157	1	0	0	1.07735	0.53049	GNG7
Ca-dependent events Homo sapiens R-HSA-111996	1/28	0.611157	1	0	0	1.07735	0.53049	PRKCA
Gap-filling DNA repair synthesis and ligation in TC-NER Homo sapiens R-HSA-6782210	2/62	0.61386	1	0	0	0.973094	0.474859	RFC1;UBA52
TNFR2 non-canonical NF-kB pathway Homo sapiens R-HSA-5668541	3/95	0.6141	1	0	0	0.952608	0.46449	EDAR;UBA52;SKP1
Influenza Viral RNA Transcription and Replication Homo sapiens R-HSA-168273	4/128	0.617104	1	0	0	0.942685	0.455051	RPS14;RPL35;NUP153;UBA52
Formation of a pool of free 40S subunits Homo sapiens R-HSA-72689	3/96	0.62119	1	0	0	0.942685	0.44883	RPS14;RPL35;UBA52
Collagen biosynthesis and modifying enzymes Homo sapiens R-HSA-1650814	2/63	0.622588	1	0	0	0.957648	0.453802	PLOD1;P4HB
Dual incision in TC-NER Homo sapiens R-HSA-6782135	2/63	0.622588	1	0	0	0.957648	0.453802	RFC1;UBA52
Asymmetric localization of PCP proteins Homo sapiens R-HSA-4608870	2/63	0.622588	1	0	0	0.957648	0.453802	SMURF2;UBA52
COPI-independent Golgi-to-ER retrograde traffic Homo sapiens R-HSA-6811436	1/29	0.624065	1	0	0	1.0402	0.490456	BICD1
HSF1 activation Homo sapiens R-HSA-3371511	1/29	0.624065	1	0	0	1.0402	0.490456	EEF1A1
Negative regulation of FGFR3 signaling Homo sapiens R-HSA-5654732	1/29	0.624065	1	0	0	1.0402	0.490456	UBA52
Myogenesis Homo sapiens R-HSA-525793	1/29	0.624065	1	0	0	1.0402	0.490456	ABL1
CDO in myogenesis Homo sapiens R-HSA-375170	1/29	0.624065	1	0	0	1.0402	0.490456	ABL1
Transferrin endocytosis and recycling Homo sapiens R-HSA-917977	1/29	0.624065	1	0	0	1.0402	0.490456	ATP6V1A
Asparagine N-linked glycosylation Homo sapiens R-HSA-446203	8/259	0.630152	1	0	0	0.931766	0.430284	FUT8;B4GALT1;MGAT5;CANX;SPTAN1;SPTBN1;ST6GALNAC5;SPTBN2
Hedgehog ligand biogenesis Homo sapiens R-HSA-5358346	2/64	0.631162	1	0	0	0.942685	0.433816	P4HB;UBA52
Muscle contraction Homo sapiens R-HSA-397014	6/196	0.635323	1	0	0	0.923446	0.418895	ANXA1;ASPH;KCNIP1;KCNQ1;ITPR3;VCL
NEP/NS2 Interacts with the Cellular Export Machinery Homo sapiens R-HSA-168333	1/30	0.636546	1	0	0	1.00553	0.454197	NUP153
Regulation of Glucokinase by Glucokinase Regulatory Protein Homo sapiens R-HSA-170822	1/30	0.636546	1	0	0	1.00553	0.454197	NUP153
RNA Polymerase I Promoter Opening Homo sapiens R-HSA-73728	1/30	0.636546	1	0	0	1.00553	0.454197	UBTF
RNA Polymerase I Promoter Escape Homo sapiens R-HSA-73772	1/30	0.636546	1	0	0	1.00553	0.454197	UBTF
Activation of Kainate Receptors upon glutamate binding Homo sapiens R-HSA-451326	1/30	0.636546	1	0	0	1.00553	0.454197	GNG7
Glucagon-type ligand receptors Homo sapiens R-HSA-420092	1/30	0.636546	1	0	0	1.00553	0.454197	GNG7
Hedgehog 'off' state Homo sapiens R-HSA-5610787	3/99	0.641922	1	0	0	0.914119	0.405218	ITCH;UBA52;SKP1
Potassium Channels Homo sapiens R-HSA-1296071	3/99	0.641922	1	0	0	0.914119	0.405218	KCNQ1;GNG7;KCNJ16
Major pathway of rRNA processing in the nucleolus Homo sapiens R-HSA-6791226	5/166	0.64785	1	0	0	0.908612	0.394425	RPS14;RPL35;SNORD3A;UBA52;EXOSC2
Trafficking of AMPA receptors Homo sapiens R-HSA-399719	1/31	0.648612	1	0	0	0.973094	0.421272	PRKCA
Glutamate Binding, Activation of AMPA Receptors and Synaptic Plasticity Homo sapiens R-HSA-399721	1/31	0.648612	1	0	0	0.973094	0.421272	PRKCA
Export of Viral Ribonucleoproteins from Nucleus Homo sapiens R-HSA-168274	1/31	0.648612	1	0	0	0.973094	0.421272	NUP153
Pausing and recovery of Tat-mediated HIV elongation Homo sapiens R-HSA-167238	1/31	0.648612	1	0	0	0.973094	0.421272	SUPT16H
Tat-mediated HIV elongation arrest and recovery Homo sapiens R-HSA-167243	1/31	0.648612	1	0	0	0.973094	0.421272	SUPT16H
Disassembly of the destruction complex and recruitment of AXIN to the membrane Homo sapiens R-HSA-4641262	1/31	0.648612	1	0	0	0.973094	0.421272	LRP5
Negative regulation of FGFR4 signaling Homo sapiens R-HSA-5654733	1/31	0.648612	1	0	0	0.973094	0.421272	UBA52
FGFR1 mutant receptor activation Homo sapiens R-HSA-1839124	1/31	0.648612	1	0	0	0.973094	0.421272	MYO18A
Adherens junctions interactions Homo sapiens R-HSA-418990	1/31	0.648612	1	0	0	0.973094	0.421272	CDH6
Protein folding Homo sapiens R-HSA-391251	3/101	0.655294	1	0	0	0.896017	0.378721	GNG7;TBCD;ACTB
Cardiac conduction Homo sapiens R-HSA-5576891	4/135	0.658586	1	0	0	0.893805	0.373307	ASPH;KCNIP1;KCNQ1;ITPR3
Keratan sulfate/keratin metabolism Homo sapiens R-HSA-1638074	1/32	0.660279	1	0	0	0.942685	0.391302	B4GALT1
Regulation of beta-cell development Homo sapiens R-HSA-186712	1/32	0.660279	1	0	0	0.942685	0.391302	HNF1B
Nuclear import of Rev protein Homo sapiens R-HSA-180746	1/32	0.660279	1	0	0	0.942685	0.391302	NUP153
DNA methylation Homo sapiens R-HSA-5334118	1/32	0.660279	1	0	0	0.942685	0.391302	UHRF1
RNA Polymerase I Transcription Termination Homo sapiens R-HSA-73863	1/32	0.660279	1	0	0	0.942685	0.391302	UBTF
HIV elongation arrest and recovery Homo sapiens R-HSA-167287	1/32	0.660279	1	0	0	0.942685	0.391302	SUPT16H
Pausing and recovery of HIV elongation Homo sapiens R-HSA-167290	1/32	0.660279	1	0	0	0.942685	0.391302	SUPT16H
Elongation arrest and recovery Homo sapiens R-HSA-112387	1/32	0.660279	1	0	0	0.942685	0.391302	SUPT16H
DNA strand elongation Homo sapiens R-HSA-69190	1/32	0.660279	1	0	0	0.942685	0.391302	RFC1
Gluconeogenesis Homo sapiens R-HSA-70263	1/32	0.660279	1	0	0	0.942685	0.391302	GAPDH
Glycolysis Homo sapiens R-HSA-70171	1/32	0.660279	1	0	0	0.942685	0.391302	GAPDH
Negative regulation of FGFR1 signaling Homo sapiens R-HSA-5654726	1/32	0.660279	1	0	0	0.942685	0.391302	UBA52
Cooperation of Prefoldin and TriC/CCT in actin and tubulin folding Homo sapiens R-HSA-389958	1/32	0.660279	1	0	0	0.942685	0.391302	ACTB
Cyclin E associated events during G1/S transition Homo sapiens R-HSA-69202	2/68	0.663942	1	0	0	0.887233	0.363376	UBA52;SKP1
Mitotic G1-G1/S phases Homo sapiens R-HSA-453279	4/136	0.664257	1	0	0	0.887233	0.362954	TOP2A;DYRK1A;UBA52;SKP1
Ion channel transport Homo sapiens R-HSA-983712	6/203	0.668631	1	0	0	0.891603	0.35889	ATP6V1A;ASPH;SCNN1A;NEDD4L;ANO10;UBA52
Sphingolipid de novo biosynthesis Homo sapiens R-HSA-1660661	1/33	0.671559	1	0	0	0.914119	0.36396	SPTLC2
Sialic acid metabolism Homo sapiens R-HSA-4085001	1/33	0.671559	1	0	0	0.914119	0.36396	ST6GALNAC5
Glucagon signaling in metabolic regulation Homo sapiens R-HSA-163359	1/33	0.671559	1	0	0	0.914119	0.36396	GNG7
Detoxification of Reactive Oxygen Species Homo sapiens R-HSA-3299685	1/33	0.671559	1	0	0	0.914119	0.36396	P4HB
Cyclin A:Cdk2-associated events at S phase entry Homo sapiens R-HSA-69656	2/69	0.671761	1	0	0	0.874374	0.347872	UBA52;SKP1
trans-Golgi Network Vesicle Budding Homo sapiens R-HSA-199992	2/70	0.679432	1	0	0	0.861883	0.333116	APP;AP3S1
Clathrin derived vesicle budding Homo sapiens R-HSA-421837	2/70	0.679432	1	0	0	0.861883	0.333116	APP;AP3S1
Signaling by WNT in cancer Homo sapiens R-HSA-4791275	1/34	0.682464	1	0	0	0.887233	0.338963	LRP5
Negative regulation of FGFR2 signaling Homo sapiens R-HSA-5654727	1/34	0.682464	1	0	0	0.887233	0.338963	UBA52
ROS, RNS production in response to bacteria Homo sapiens R-HSA-1222556	1/34	0.682464	1	0	0	0.887233	0.338963	ATP6V1A
L13a-mediated translational silencing of Ceruloplasmin expression Homo sapiens R-HSA-156827	3/106	0.687137	1	0	0	0.853752	0.320346	RPS14;RPL35;UBA52
3' -UTR-mediated translational regulation Homo sapiens R-HSA-157279	3/106	0.687137	1	0	0	0.853752	0.320346	RPS14;RPL35;UBA52
Metabolism of lipids and lipoproteins Homo sapiens R-HSA-556833	20/659	0.689723	1	0	0	0.915506	0.340078	ABCC3;CHD9;PRKAG2;PIK3CB;HSPG2;SUMF1;NCOR2;INPP4A;TIAM2;HADHA;LIPC;MED13;NCEH1;RXRA;SPTLC2;SIN3A;TRIB3;P4HB;TEAD1;MGLL
Lysosome Vesicle Biogenesis Homo sapiens R-HSA-432720	1/35	0.693009	1	0	0	0.861883	0.316064	APP
Generation of second messenger molecules Homo sapiens R-HSA-202433	1/35	0.693009	1	0	0	0.861883	0.316064	PAK2
Regulation of TP53 Degradation Homo sapiens R-HSA-6804757	1/35	0.693009	1	0	0	0.861883	0.316064	UBA52
Post NMDA receptor activation events Homo sapiens R-HSA-438064	1/35	0.693009	1	0	0	0.861883	0.316064	RPS6KA2
Mitotic Prophase Homo sapiens R-HSA-68875	3/107	0.693235	1	0	0	0.845773	0.30988	NEK6;PRKCA;NUP153
SRP-dependent cotranslational protein targeting to membrane Homo sapiens R-HSA-1799339	3/107	0.693235	1	0	0	0.845773	0.30988	RPS14;RPL35;UBA52
Costimulation by the CD28 family Homo sapiens R-HSA-388841	2/72	0.694335	1	0	0	0.837942	0.305682	TRIB3;PAK2
Neurotransmitter Receptor Binding And Downstream Transmission In The Postsynaptic Cell Homo sapiens R-HSA-112314	4/142	0.696928	1	0	0	0.849744	0.30682	RPS6KA2;GNG7;KCNJ16;PRKCA
Regulation of TP53 Expression and Degradation Homo sapiens R-HSA-6806003	1/36	0.703203	1	0	0	0.837942	0.295047	UBA52
Respiratory electron transport, ATP synthesis by chemiosmotic coupling, and heat production by uncoupling proteins. Homo sapiens R-HSA-163200	3/109	0.70516	1	0	0	0.830254	0.290033	UQCR11;SDHA;NDUFV2
Sphingolipid metabolism Homo sapiens R-HSA-428157	2/74	0.708661	1	0	0	0.815295	0.28077	SPTLC2;SUMF1
NCAM1 interactions Homo sapiens R-HSA-419037	1/37	0.71306	1	0	0	0.815295	0.275725	AGRN
rRNA processing Homo sapiens R-HSA-72312	5/180	0.716184	1	0	0	0.837942	0.27972	RPS14;RPL35;SNORD3A;UBA52;EXOSC2
RNA Polymerase I Promoter Clearance Homo sapiens R-HSA-73854	2/76	0.722421	1	0	0	0.79384	0.258114	MBD3;UBTF
Transcription-Coupled Nucleotide Excision Repair (TC-NER) Homo sapiens R-HSA-6781827	2/76	0.722421	1	0	0	0.79384	0.258114	RFC1;UBA52
MAP2K and MAPK activation Homo sapiens R-HSA-5674135	1/38	0.722589	1	0	0	0.79384	0.25793	VCL
Senescence-Associated Secretory Phenotype (SASP) Homo sapiens R-HSA-2559582	2/77	0.729094	1	0	0	0.78353	0.247559	RPS6KA2;UBA52
RNA polymerase II transcribes snRNA genes Homo sapiens R-HSA-6807505	2/77	0.729094	1	0	0	0.78353	0.247559	NCBP1;NCBP2
Collagen degradation Homo sapiens R-HSA-1442490	1/39	0.731803	1	0	0	0.773485	0.241516	ADAM10
Formation of Fibrin Clot (Clotting Cascade) Homo sapiens R-HSA-140877	1/39	0.731803	1	0	0	0.773485	0.241516	TFPI
Activation of NMDA receptor upon glutamate binding and postsynaptic events Homo sapiens R-HSA-442755	1/39	0.731803	1	0	0	0.773485	0.241516	RPS6KA2
RNA Polymerase I Transcription Homo sapiens R-HSA-73864	2/79	0.74203	1	0	0	0.763694	0.22786	MBD3;UBTF
Glucose metabolism Homo sapiens R-HSA-70326	2/79	0.74203	1	0	0	0.763694	0.22786	UBA52;GAPDH
Regulation of APC/C activators between G1/S and early anaphase Homo sapiens R-HSA-176408	2/79	0.74203	1	0	0	0.763694	0.22786	UBA52;SKP1
RNA Polymerase I, RNA Polymerase III, and Mitochondrial Transcription Homo sapiens R-HSA-504046	3/116	0.744104	1	0	0	0.780153	0.230594	MBD3;NFIB;UBTF
Generic Transcription Pathway Homo sapiens R-HSA-212436	24/812	0.748132	1	0	0	0.891603	0.258721	MBD3;SUPT16H;SMAD3;THRB;SMURF2;ZNF282;CHD9;HUS1;NEDD4L;PRKAG2;TSC1;CNOT10;NR2F6;NCOR2;MED13;RXRA;RARA;ZNF205;CDK12;CDK13;TEAD1;UBA52;MAMLD1;RNF111
Glycosphingolipid metabolism Homo sapiens R-HSA-1660662	1/41	0.749324	1	0	0	0.735754	0.212327	SUMF1
Intraflagellar transport Homo sapiens R-HSA-5620924	1/41	0.749324	1	0	0	0.735754	0.212327	TRIP11
RNA Polymerase III Abortive And Retractive Initiation Homo sapiens R-HSA-749476	1/41	0.749324	1	0	0	0.735754	0.212327	NFIB
RNA Polymerase III Transcription Homo sapiens R-HSA-74158	1/41	0.749324	1	0	0	0.735754	0.212327	NFIB
Pre-NOTCH Transcription and Translation Homo sapiens R-HSA-1912408	1/41	0.749324	1	0	0	0.735754	0.212327	MAMLD1
Histidine, lysine, phenylalanine, tyrosine, proline and tryptophan catabolism Homo sapiens R-HSA-6788656	1/41	0.749324	1	0	0	0.735754	0.212327	OGDH
Vesicle-mediated transport Homo sapiens R-HSA-5653656	14/492	0.757397	1	0	0	0.85838	0.238517	APP;PRKAG2;KLC1;BICD1;KIF15;GOLGA4;TRIP11;AP3S1;KIF20A;CHMP6;UBA52;SPTAN1;SPTBN1;SPTBN2
Intrinsic Pathway for Apoptosis Homo sapiens R-HSA-109606	1/42	0.75765	1	0	0	0.718236	0.199334	NMT1
Viral Messenger RNA Synthesis Homo sapiens R-HSA-168325	1/42	0.75765	1	0	0	0.718236	0.199334	NUP153
Transcriptional regulation of pluripotent stem cells Homo sapiens R-HSA-452723	1/42	0.75765	1	0	0	0.718236	0.199334	SALL1
Deactivation of the beta-catenin transactivating complex Homo sapiens R-HSA-3769402	1/42	0.75765	1	0	0	0.718236	0.199334	UBA52
Cooperation of PDCL (PhLP1) and TRiC/CCT in G-protein beta folding Homo sapiens R-HSA-6814122	1/42	0.75765	1	0	0	0.718236	0.199334	GNG7
tRNA Aminoacylation Homo sapiens R-HSA-379724	1/42	0.75765	1	0	0	0.718236	0.199334	SARS
Degradation of beta-catenin by the destruction complex Homo sapiens R-HSA-195253	2/82	0.760442	1	0	0	0.735754	0.20149	UBA52;SKP1
ERCC6 (CSB) and EHMT2 (G9a) positively regulate rRNA expression Homo sapiens R-HSA-427389	1/43	0.765701	1	0	0	0.701533	0.187283	MBD3
Voltage gated Potassium channels Homo sapiens R-HSA-1296072	1/43	0.765701	1	0	0	0.701533	0.187283	KCNQ1
Iron uptake and transport Homo sapiens R-HSA-917937	1/43	0.765701	1	0	0	0.701533	0.187283	ATP6V1A
TP53 Regulates Metabolic Genes Homo sapiens R-HSA-5628897	2/84	0.772075	1	0	0	0.718236	0.185789	PRKAG2;TSC1
Intra-Golgi traffic Homo sapiens R-HSA-6811438	1/44	0.773485	1	0	0	0.685589	0.176093	TRIP11
APC/C-mediated degradation of cell cycle proteins Homo sapiens R-HSA-174143	2/85	0.777705	1	0	0	0.709786	0.178446	UBA52;SKP1
Regulation of mitotic cell cycle Homo sapiens R-HSA-453276	2/85	0.777705	1	0	0	0.709786	0.178446	UBA52;SKP1
RMTs methylate histone arginines Homo sapiens R-HSA-3214858	1/45	0.78101	1	0	0	0.670354	0.165689	SMARCC1
Interferon Signaling Homo sapiens R-HSA-913531	5/196	0.782104	1	0	0	0.769539	0.189128	SUMO1;FLNB;NUP153;UBA52;KPNA1
Unfolded Protein Response (UPR) Homo sapiens R-HSA-381119	2/86	0.783212	1	0	0	0.701533	0.17142	SEC62;EXOSC2
Neuronal System Homo sapiens R-HSA-112316	8/301	0.784385	1	0	0	0.801752	0.194709	PTPRD;SLC38A1;RPS6KA2;KCNQ1;GNG7;KCNJ16;PRKCA;PTPRF
Phospholipid metabolism Homo sapiens R-HSA-1483257	4/161	0.785082	1	0	0	0.749464	0.181346	INPP4A;HADHA;PIK3CB;MGLL
Metabolism of nucleotides Homo sapiens R-HSA-15869	2/87	0.7886	1	0	0	0.693469	0.164696	GDA;NT5C2
Antigen activates B Cell Receptor (BCR) leading to generation of second messengers Homo sapiens R-HSA-983695	1/47	0.795321	1	0	0	0.641828	0.146985	ITPR3
Activation of anterior HOX genes in hindbrain development during early embryogenesis Homo sapiens R-HSA-5617472	2/89	0.799022	1	0	0	0.677886	0.152095	RXRA;RARA
Activation of HOX genes during differentiation Homo sapiens R-HSA-5619507	2/89	0.799022	1	0	0	0.677886	0.152095	RXRA;RARA
TP53 Regulates Transcription of Cell Cycle Genes Homo sapiens R-HSA-6791312	1/48	0.802122	1	0	0	0.628457	0.138571	CNOT10
Retrograde transport at the Trans-Golgi-Network Homo sapiens R-HSA-6811440	1/49	0.808697	1	0	0	0.615631	0.130717	GOLGA4
Complex I biogenesis Homo sapiens R-HSA-6799198	1/49	0.808697	1	0	0	0.615631	0.130717	NDUFV2
ER to Golgi Anterograde Transport Homo sapiens R-HSA-199977	3/131	0.813684	1	0	0	0.690822	0.142436	SPTAN1;SPTBN1;SPTBN2
Formation of the ternary complex, and subsequently, the 43S complex Homo sapiens R-HSA-72695	1/50	0.815054	1	0	0	0.603318	0.123379	RPS14
CDK-mediated phosphorylation and removal of Cdc6 Homo sapiens R-HSA-69017	1/50	0.815054	1	0	0	0.603318	0.123379	UBA52
Ubiquitin-dependent degradation of Cyclin D1 Homo sapiens R-HSA-69229	1/50	0.815054	1	0	0	0.603318	0.123379	UBA52
Ubiquitin-dependent degradation of Cyclin D Homo sapiens R-HSA-75815	1/50	0.815054	1	0	0	0.603318	0.123379	UBA52
Transcriptional Regulation by TP53 Homo sapiens R-HSA-3700989	9/348	0.819034	1	0	0	0.780153	0.155741	MBD3;SUPT16H;HUS1;PRKAG2;TSC1;CNOT10;CDK12;CDK13;UBA52
Autodegradation of the E3 ubiquitin ligase COP1 Homo sapiens R-HSA-349425	1/51	0.821201	1	0	0	0.591488	0.116516	UBA52
p53-Independent DNA Damage Response Homo sapiens R-HSA-69610	1/52	0.827143	1	0	0	0.580114	0.110093	UBA52
p53-Independent G1/S DNA damage checkpoint Homo sapiens R-HSA-69613	1/52	0.827143	1	0	0	0.580114	0.110093	UBA52
Ubiquitin Mediated Degradation of Phosphorylated Cdc25A Homo sapiens R-HSA-69601	1/52	0.827143	1	0	0	0.580114	0.110093	UBA52
Chaperonin-mediated protein folding Homo sapiens R-HSA-390466	2/95	0.827603	1	0	0	0.635072	0.12017	GNG7;ACTB
Transmission across Chemical Synapses Homo sapiens R-HSA-112315	5/211	0.832548	1	0	0	0.714832	0.131003	SLC38A1;RPS6KA2;GNG7;KCNJ16;PRKCA
XBP1(S) activates chaperone genes Homo sapiens R-HSA-381038	1/53	0.832888	1	0	0	0.569168	0.104076	SEC62
Formation of TC-NER Pre-Incision Complex Homo sapiens R-HSA-6781823	1/53	0.832888	1	0	0	0.569168	0.104076	UBA52
Vif-mediated degradation of APOBEC3G Homo sapiens R-HSA-180585	1/53	0.832888	1	0	0	0.569168	0.104076	UBA52
Synthesis of DNA Homo sapiens R-HSA-69239	2/97	0.836285	1	0	0	0.621978	0.111201	RFC1;UBA52
Assembly of collagen fibrils and other multimeric structures Homo sapiens R-HSA-2022090	1/54	0.838442	1	0	0	0.558628	0.0984355	PLEC
Golgi Associated Vesicle Biogenesis Homo sapiens R-HSA-432722	1/54	0.838442	1	0	0	0.558628	0.0984355	AP3S1
Meiotic recombination Homo sapiens R-HSA-912446	1/54	0.838442	1	0	0	0.558628	0.0984355	BRCA2
Stabilization of p53 Homo sapiens R-HSA-69541	1/54	0.838442	1	0	0	0.558628	0.0984355	UBA52
AUF1 (hnRNP D0) binds and destabilizes mRNA Homo sapiens R-HSA-450408	1/54	0.838442	1	0	0	0.558628	0.0984355	UBA52
IRE1alpha activates chaperones Homo sapiens R-HSA-381070	1/55	0.843812	1	0	0	0.548471	0.0931441	SEC62
Hh mutants that don't undergo autocatalytic processing are degraded by ERAD Homo sapiens R-HSA-5362768	1/55	0.843812	1	0	0	0.548471	0.0931441	UBA52
Transport of inorganic cations/anions and amino acids/oligopeptides Homo sapiens R-HSA-425393	2/99	0.84457	1	0	0	0.609412	0.102946	SLC38A1;SLC7A11
Phase II conjugation Homo sapiens R-HSA-156580	2/100	0.848569	1	0	0	0.603318	0.0990675	MGST3;CHAC1
Degradation of DVL Homo sapiens R-HSA-4641258	1/56	0.849004	1	0	0	0.538677	0.0881766	UBA52
Transport of glucose and other sugars, bile salts and organic acids, metal ions and amine compounds Homo sapiens R-HSA-425366	2/101	0.852473	1	0	0	0.597345	0.0953444	SLC2A1;SLC39A10
tRNA processing in the nucleus Homo sapiens R-HSA-6784531	1/57	0.854024	1	0	0	0.529227	0.0835099	NUP153
Ribosomal scanning and start codon recognition Homo sapiens R-HSA-72702	1/57	0.854024	1	0	0	0.529227	0.0835099	RPS14
Translation initiation complex formation Homo sapiens R-HSA-72649	1/57	0.854024	1	0	0	0.529227	0.0835099	RPS14
RNA Polymerase I Chain Elongation Homo sapiens R-HSA-73777	1/57	0.854024	1	0	0	0.529227	0.0835099	UBTF
Hh mutants abrogate ligand secretion Homo sapiens R-HSA-5387390	1/57	0.854024	1	0	0	0.529227	0.0835099	UBA52
Glycerophospholipid biosynthesis Homo sapiens R-HSA-1483206	2/102	0.856286	1	0	0	0.591488	0.0917702	HADHA;MGLL
Activation of the mRNA upon binding of the cap-binding complex and eIFs, and subsequent binding to 43S Homo sapiens R-HSA-72662	1/58	0.858877	1	0	0	0.520102	0.0791231	RPS14
CDT1 association with the CDC6:ORC:origin complex Homo sapiens R-HSA-68827	1/58	0.858877	1	0	0	0.520102	0.0791231	UBA52
Telomere Maintenance Homo sapiens R-HSA-157579	1/59	0.863568	1	0	0	0.511287	0.0749966	RFC1
The role of GTSE1 in G2/M progression after G2 checkpoint Homo sapiens R-HSA-8852276	1/59	0.863568	1	0	0	0.511287	0.0749966	UBA52
DNA Replication Homo sapiens R-HSA-69306	2/105	0.86719	1	0	0	0.574589	0.0818776	RFC1;UBA52
Translocation of GLUT4 to the plasma membrane Homo sapiens R-HSA-1445148	1/60	0.868105	1	0	0	0.502765	0.0711127	PRKAG2
Autodegradation of Cdh1 by Cdh1:APC/C Homo sapiens R-HSA-174084	1/62	0.87673	1	0	0	0.486547	0.0640084	UBA52
FCERI mediated Ca+2 mobilization Homo sapiens R-HSA-2871809	1/62	0.87673	1	0	0	0.486547	0.0640084	ITPR3
Cytochrome P450 - arranged by substrate type Homo sapiens R-HSA-211897	1/62	0.87673	1	0	0	0.486547	0.0640084	RXRA
Synthesis of substrates in N-glycan biosythesis Homo sapiens R-HSA-446219	1/63	0.880829	1	0	0	0.478824	0.0607589	ST6GALNAC5
p53-Dependent G1/S DNA damage checkpoint Homo sapiens R-HSA-69580	1/63	0.880829	1	0	0	0.478824	0.0607589	UBA52
p53-Dependent G1 DNA Damage Response Homo sapiens R-HSA-69563	1/63	0.880829	1	0	0	0.478824	0.0607589	UBA52
Metabolism Homo sapiens R-HSA-1430728	55/1908	0.881771	1	0	0	0.869562	0.109411	PANK2;B4GALT1;GDA;CHD9;SLC2A1;PRKAG2;PIK3CB;RPS14;LIPC;MED13;SPTLC2;SIN3A;RPL35;CHAC1;TEAD1;ABCC3;SARS;PRKCA;SDHA;HSPG2;SUMF1;NCOR2;INPP4A;TIAM2;HADHA;VCAN;PLCB4;BTD;MTHFD2L;SMS;TRIB3;UBA52;GAPDH;MGLL;MMADHC;MGST3;ITPR3;UQCR11;NT5C2;RXRA;MTHFD1L;CBS;GNG7;HAS3;NDUFV2;CA12;NUP153;NMNAT2;EXT1;GALE;NCEH1;GNAQ;OGDH;P4HB;AGRN
ER-Phagosome pathway Homo sapiens R-HSA-1236974	1/65	0.888623	1	0	0	0.464091	0.0548008	UBA52
G1/S DNA Damage Checkpoints Homo sapiens R-HSA-69615	1/65	0.888623	1	0	0	0.464091	0.0548008	UBA52
G1/S Transition Homo sapiens R-HSA-69206	2/112	0.88974	1	0	0	0.538677	0.0629318	UBA52;SKP1
Transmembrane transport of small molecules Homo sapiens R-HSA-382551	15/594	0.890216	1	0	0	0.761765	0.088587	ATP6V1A;ABCC3;ABCC4;SLC38A1;SLC2A1;NEDD4L;SLC39A10;NUP153;SLC7A11;ASPH;MYO5B;GNG7;SCNN1A;ANO10;UBA52
O-linked glycosylation of mucins Homo sapiens R-HSA-913709	1/66	0.892327	1	0	0	0.457059	0.0520693	GCNT1
APC/C:Cdc20 mediated degradation of Securin Homo sapiens R-HSA-174154	1/66	0.892327	1	0	0	0.457059	0.0520693	UBA52
Assembly of the pre-replicative complex Homo sapiens R-HSA-68867	1/67	0.895908	1	0	0	0.450238	0.0494888	UBA52
TCF dependent signaling in response to WNT Homo sapiens R-HSA-201681	4/199	0.89971	1	0	0	0.60635	0.0640806	SMURF2;LRP5;UBA52;LGR4
Switching of origins to a post-replicative state Homo sapiens R-HSA-69052	1/70	0.905954	1	0	0	0.430942	0.0425628	UBA52
Orc1 removal from chromatin Homo sapiens R-HSA-68949	1/70	0.905954	1	0	0	0.430942	0.0425628	UBA52
APC/C:Cdh1 mediated degradation of Cdc20 and other APC/C:Cdh1 targeted proteins in late mitosis/early G1 Homo sapiens R-HSA-174178	1/71	0.909082	1	0	0	0.424872	0.0404987	UBA52
Cdc20:Phospho-APC/C mediated degradation of Cyclin A Homo sapiens R-HSA-174184	1/71	0.909082	1	0	0	0.424872	0.0404987	UBA52
Transcriptional regulation by small RNAs Homo sapiens R-HSA-5578749	1/72	0.912107	1	0	0	0.418971	0.0385445	NUP153
APC:Cdc20 mediated degradation of cell cycle proteins prior to satisfation of the cell cycle checkpoint Homo sapiens R-HSA-179419	1/72	0.912107	1	0	0	0.418971	0.0385445	UBA52
Removal of licensing factors from origins Homo sapiens R-HSA-69300	1/72	0.912107	1	0	0	0.418971	0.0385445	UBA52
APC/C:Cdc20 mediated degradation of mitotic proteins Homo sapiens R-HSA-176409	1/74	0.917858	1	0	0	0.407647	0.0349405	UBA52
Activation of APC/C and APC/C:Cdc20 mediated degradation of mitotic proteins Homo sapiens R-HSA-176814	1/75	0.920591	1	0	0	0.402212	0.0332788	UBA52
Regulation of DNA replication Homo sapiens R-HSA-69304	1/75	0.920591	1	0	0	0.402212	0.0332788	UBA52
Biosynthesis of the N-glycan precursor (dolichol lipid-linked oligosaccharide, LLO) and transfer to a nascent protein Homo sapiens R-HSA-446193	1/78	0.928257	1	0	0	0.386742	0.0287916	ST6GALNAC5
Metabolism of amino acids and derivatives Homo sapiens R-HSA-71291	7/335	0.930572	1	0	0	0.630333	0.0453561	RPS14;CBS;OGDH;SMS;RPL35;SARS;UBA52
Antigen processing-Cross presentation Homo sapiens R-HSA-1236975	1/82	0.937342	1	0	0	0.367877	0.0238043	UBA52
DNA Replication Pre-Initiation Homo sapiens R-HSA-69002	1/82	0.937342	1	0	0	0.367877	0.0238043	UBA52
M/G1 Transition Homo sapiens R-HSA-68874	1/82	0.937342	1	0	0	0.367877	0.0238043	UBA52
Metabolism of polyamines Homo sapiens R-HSA-351202	1/84	0.941444	1	0	0	0.359118	0.0216695	SMS
Class B/2 (Secretin family receptors) Homo sapiens R-HSA-373080	1/84	0.941444	1	0	0	0.359118	0.0216695	GNG7
SLC-mediated transmembrane transport Homo sapiens R-HSA-425407	5/268	0.945058	1	0	0	0.562797	0.0318029	SLC38A1;SLC2A1;SLC39A10;NUP153;SLC7A11
Chromosome Maintenance Homo sapiens R-HSA-73886	1/86	0.945277	1	0	0	0.350766	0.01974	RFC1
Phase 1 - Functionalization of compounds Homo sapiens R-HSA-211945	1/92	0.955339	1	0	0	0.32789	0.014981	RXRA
Signaling by GPCR Homo sapiens R-HSA-372790	33/1293	0.956265	1	0	0	0.769896	0.0344302	APP;IRS1;ITSN1;IRS2;ITPR3;RASAL2;PIK3CB;KALRN;EGFR;GNA13;DUSP10;RGS3;GNG7;RPS6KA2;SPTAN1;SPTBN1;SPTBN2;PRKCH;ANXA1;ARHGEF17;ARHGEF16;DAB2IP;PRKCA;EREG;TIAM2;PLCB4;OBSCN;GNAQ;IL3RA;NF1;UBA52;MGLL;VCL
Interferon gamma signaling Homo sapiens R-HSA-877300	1/93	0.956826	1	0	0	0.324365	0.0143153	SUMO1
Biological oxidations Homo sapiens R-HSA-211859	3/199	0.962846	1	0	0	0.454763	0.0172183	RXRA;MGST3;CHAC1
Gene Silencing by RNA Homo sapiens R-HSA-211000	1/101	0.967075	1	0	0	0.298672	0.00999922	NUP153
Immunoregulatory interactions between a Lymphoid and a non-Lymphoid cell Homo sapiens R-HSA-198933	2/157	0.96836	1	0	0	0.384279	0.0123551	ITGB1;ITGB2
tRNA processing Homo sapiens R-HSA-72306	1/103	0.969233	1	0	0	0.292873	0.00915245	NUP153
G alpha (i) signalling events Homo sapiens R-HSA-418594	3/240	0.987217	1	0	0	0.377074	0.00485138	APP;ANXA1;GNG7
Peptide ligand-binding receptors Homo sapiens R-HSA-375276	2/193	0.98888	1	0	0	0.3126	0.0034955	APP;ANXA1
G alpha (s) signalling events Homo sapiens R-HSA-418555	1/142	0.991804	1	0	0	0.212436	0.0017484	GNG7
GPCR downstream signaling Homo sapiens R-HSA-388396	19/983	0.997075	1	0	0	0.583064	0.00170792	APP;PRKCH;ANXA1;ARHGEF17;ITSN1;ARHGEF16;PRKCA;ITPR3;PIK3CB;KALRN;TIAM2;GNA13;PLCB4;OBSCN;RGS3;GNG7;GNAQ;IL3RA;MGLL
Class A/1 (Rhodopsin-like receptors) Homo sapiens R-HSA-373076	2/323	0.999787	1	0	0	0.186786	3.96977e-05	APP;ANXA1
GPCR ligand binding Homo sapiens R-HSA-500792	3/447	0.999963	1	0	0	0.202456	7.53558e-06	APP;ANXA1;GNG7

## Sheet: ARCHS4 Tissues
Term	Overlap	P-value	Adjusted P-value	Old P-value	Old Adjusted P-value	Odds Ratio	Combined Score	Genes
PLACENTA (BULK)	129/2316	1.53755e-09	1.66056e-07	0	0	1.68023	34.0969	APP;ERRFI1;GDA;IRS2;CCAR1;DCAF1;GOLGA4;SLK;PPP4R2;THSD7A;TNS4;TNS3;TGM2;SLC38A1;MBNL2;SEMA6A;MORC4;LIMCH1;DYRK1A;ACTN4;HSPG2;CD2AP;ZC3H11A;PARD3;SMS;PKP3;EZR;RAI14;MACF1;LTBP2;RASAL2;PSEN1;LYPD6;KALRN;PLCXD2;PCNX3;FUT8;ATXN1;COBLL1;ABL1;EP400;ZBED6;KIAA0319L;MYH10;FAM120AOS;NEBL;IQSEC1;BTBD16;CRIM1;NUP153;ARHGAP26;FAM160A1;LRCH1;MYO5B;OGDH;NF1;PLXNB2;FAT4;AMOTL1;BCAR3;ITGB1;NRP1;RNF11;DOCK4;B4GAL…
FIBROBLAST	127/2316	5.55582e-09	3.00014e-07	0	0	1.65418	31.4433	APP;ERRFI1;IRS1;TNC;HDLBP;MSANTD3;HSF2BP;ARHGAP39;PLOD1;MKI67;CCDC102A;ALCAM;SALL1;LURAP1L;RPS6KA2;PLS3;ZNF205;CHAC1;TNS3;TGM2;KIRREL3;SCARA3;PRKCA;LMO7;ACTN4;HSPG2;CLIP2;PARD3;ROR1;TRIB3;KIF20A;OBSL1;VCL;EPHA2;RAI14;CDCA2;GLIS3;ARHGAP18;ITPR3;LTBP2;LYPD6;TRHDE;CTIF;RAI1;PDGFC;ABL1;TSPAN4;MAP4;ZBED6;SMAD3;SMURF2;BDNF;NEK6;CRIM1;MICAL2;HMGA2;ARHGAP24;NR2F6;EXT1;ANLN;NCEH1;PLXNB2;FAT4;AMOTL1;BCAR3;…
PODOCYTE	123/2316	6.43628e-08	2.31706e-06	0	0	1.60208	26.5283	APP;EHF;IRS1;TNC;HSF2BP;ARHGAP39;PLOD1;CCDC102A;CDH6;ALCAM;SALL1;ZNF608;LURAP1L;SIRPA;ZNF205;CHAC1;EPHB2;TGM2;HNF1B;ACTN4;HSPG2;PARD3;DOK7;ERF;ROR1;TRIB3;PKP3;TRABD2B;VCL;EPHA2;RAI14;GLIS3;ITPR3;LTBP2;LYPD6;EVPL;PLCXD2;CTIF;RAI1;PDGFC;ABL1;TSPAN4;OR7E47P;SPTBN2;BDNF;NEK6;BTBD16;CRIM1;DCDC2;MICAL2;ABTB2;EXT1;FAM160A1;NCEH1;MYO5B;PLXNB2;BCAR3;ITGB1;LGALS3BP;SH2D4A;PODXL2;MTCL1;SLC2A1;TNFAIP2;PTPRJ;…
AMNIOTIC FLUID	122/2316	1.15788e-07	3.12628e-06	0	0	1.58905	25.3795	ERRFI1;EHF;HSF2BP;ARHGAP39;SLK;ZNF608;LURAP1L;RPS6KA2;CHAC1;THSD7A;TNS4;TGM2;SCARA3;MBNL2;LIMCH1;MAGI3;KCTD1;HNF1B;LMO7;CD2AP;PARD3;DOK7;SCNN1A;ROR1;PKP3;EPHA2;RAI14;GLIS3;NEDD4L;ITPR3;RASAL2;LYPD6;PPL;EVPL;CTIF;RAI1;ZNHIT6;COBLL1;GRPEL2;HIVEP2;B4GALNT3;OR7E47P;RREB1;SPTBN2;ZFHX2;NEBL;BTBD16;ARHGEF38;DCDC2;B3GALT5;ARHGAP24;NR2F6;ABTB2;FAM160A1;MYO5B;AMOTL1;MCU;BCAR3;SETD5;SETD2;THRB;SH2D4A;MAST4;…
ASTROCYTE	122/2316	1.15788e-07	2.50103e-06	0	0	1.58905	25.3795	APP;ERRFI1;IRS1;TNC;HSF2BP;ARHGAP39;PLOD1;CCDC102A;ACTG1;CDH6;SALL1;ZNF608;LURAP1L;RPS6KA2;PLS3;ZNF205;CHAC1;STK32A;EPHB2;BAHCC1;FAAP100;SCARA3;ZNF282;CEP131;HSPG2;PCDHA11;CLIP2;CDC34;PARD3;ERF;ROR1;KIF20A;OBSL1;VCL;EPHA2;RAI14;GLIS3;LTBP2;LYPD6;TRHDE;CTIF;RAI1;PDGFC;ABL1;TSPAN4;RAB11FIP3;PCDHA7;PCDHA6;SPTBN2;BDNF;NEK6;MICAL2;HMGA2;EEF2;NR2F6;ABTB2;EXT1;ANLN;NCEH1;PLXNB2;TMCC2;FAT4;AMOTL1;BCAR3;I…
BASAL CELL	122/2316	1.15788e-07	2.08419e-06	0	0	1.58905	25.3795	APP;ERRFI1;EHF;IRS1;TNC;MSANTD3;HSF2BP;ARHGAP39;ALCAM;SLK;LURAP1L;PLS3;ZNF205;CHAC1;STK32A;TNS4;SLC16A5;SCARA3;PPTC7;ARRDC1;KCTD1;LMO7;HSPG2;CD2AP;EREG;EDAR;PARD3;KCNQ1;DOK7;SCNN1A;ERF;TRIB3;PKP3;TRABD2B;EPHA2;RAI14;ITPR3;LYPD6;PPL;EVPL;RAI1;COBLL1;PDGFC;GRPEL2;B4GALNT3;SPTBN2;SMAD3;NEBL;BTBD16;HMGA2;NR2F6;EXT1;FAM160A1;NCEH1;MYO5B;PLXNB2;AMOTL1;BCAR3;ITGB1;THRB;SH2D4A;MAST4;MTCL1;KIAA1671;SLC2A1…
NEURONAL EPITHELIUM	122/2316	1.15788e-07	1.78645e-06	0	0	1.58905	25.3795	ZMYND8;ITSN1;TNC;ZBTB20;NUCKS1;FNBP1L;MKI67;CCAR1;ACTG1;CDH6;GOLGA4;SALL1;ZNF608;THSD7A;EPHB2;SKP1;SUPT16H;SLC38A1;SMARCC1;SEMA6A;MORC4;LIMCH1;MAGI3;KCTD1;PRKCA;THOC2;INIP;TIAM2;MORF4L1;PARD3;PHIP;KIF20A;PDE9A;RAI14;FTO;ANKRD17;MACF1;CDCA2;ARL3;NEDD4L;RASAL2;KALRN;SKA2;FUT8;PDGFC;ANKRD10;SRGAP3;CLSPN;ZC3H13;SRGAP1;MYH10;BPTF;MGEA5;WSCD1;RDX;CBX1;HMGA2;PTPRD;ANLN;NASP;NF1;ANP32E;FAT4;AMOTL1;CALM2;…
THYROID (BULK TISSUE)	122/2316	1.15788e-07	1.56314e-06	0	0	1.58905	25.3795	APP;ERRFI1;EHF;IRS1;TNC;ARHGAP39;JADE2;CCDC102A;SALL1;ZNF608;RPS6KA2;ZNF205;THSD7A;STK32A;SCARA3;ZNF282;LIMCH1;MAGI3;LMO7;ACTN4;HSPG2;PCDHA11;OBSCN;PARD3;KCNQ1;DOK7;ERF;PKP3;OBSL1;EPHA2;GLIS3;ITPR3;LTBP2;PPL;EVPL;RAI1;PDGFC;RHPN1;ABL1;TSPAN4;B4GALNT3;ZBED6;RAB11FIP3;SMAD3;NEBL;BDNF;DCDC2;EEF2;ARHGAP24;NR2F6;ABTB2;EXT1;FAM160A1;MYO5B;PLXNB2;FAT4;AMOTL1;BCAR3;LGALS3BP;DIDO1;SH2D4A;KIAA1671;ADIRF;EF…
FETAL LUNG	115/2316	5.29628e-06	6.35554e-05	0	0	1.49788	18.197	IRS1;TNC;HDLBP;HSF2BP;ARHGAP39;PLOD1;MKI67;CCDC102A;SALL1;ZNF608;LURAP1L;RPS6KA2;ZNF205;CHAC1;EPHB2;BAHCC1;TGM2;SCARA3;LMO7;HSPG2;CLIP2;OBSCN;PARD3;HECW2;ERF;ROR1;TRIB3;KIF20A;EPHA2;RAI14;CDCA2;GLIS3;LTBP2;TRHDE;PCNX3;CTIF;RAI1;PDGFC;ABL1;TSPAN4;ZBED6;OR7E47P;PCDHA7;SMAD3;BDNF;NEK6;CRIM1;MICAL2;HMGA2;ARHGAP24;NR2F6;EXT1;ANLN;PLXNB2;FAT4;AMOTL1;BCAR3;NRP1;DOCK4;SH2D4A;MTCL1;SLC2A1;SLC7A11;SHB;ARHG…
MYOBLAST	115/2316	5.29628e-06	5.71998e-05	0	0	1.49788	18.197	ERRFI1;IRS1;HDLBP;ZBTB20;PLOD1;ACTB;ACTG1;GOLGA3;ALCAM;RPS6KA2;PLS3;MACROD2;TNS4;TNS3;CDK5RAP2;SKP1;SARS;KCTD1;LMO7;TSC1;HSPG2;TIAM2;MORF4L1;PARD3;LPAL2;ROR1;MMADHC;VCL;EPHA2;RAI14;MACF1;ARL3;ARHGAP18;LTBP2;RASAL2;SKA2;PDGFC;ANKRD10;ABL2;MAP4;NDUFV2;SRGAP1;SPTBN1;SMAD3;UBE2B;SMURF2;RDX;CRIM1;HMGA2;ARHGAP24;ANP32E;AMOTL1;CALM2;NFE2L2;BCAR3;ITGB1;LGALS3BP;NRP1;B4GALT1;CHD9;ADIRF;EFCAB5;SLC7A11;PRSS…
GASTRIC EPITHELIAL CELL	112/2316	2.33053e-05	0.000228816	0	0	1.4588	15.5608	APP;ERRFI1;EHF;ARHGAP39;ACTB;ACTG1;LURAP1L;ZNF205;CHAC1;STK32A;TNS4;SLC16A5;HNF1B;LMO7;HSPG2;CD2AP;BTD;PARD3;KCNQ1;DOK7;SCNN1A;ROR1;TRIB3;PKP3;EPHA2;GLIS3;ARHGAP18;ITPR3;LYPD6;PPL;EVPL;RAI1;B4GALNT3;ZBED6;SPTBN1;SPTBN2;SMAD3;ZFHX2;NEBL;BTBD16;ARHGEF38;DCDC2;B3GALT5;NR2F6;ABTB2;EXT1;FAM160A1;NCEH1;MYO5B;PLXNB2;MCU;BCAR3;LGALS3BP;PIGR;B4GALT1;SH2D4A;MTCL1;KIAA1671;SLC2A1;TNFAIP2;ADIRF;SHB;ARHGAP6;P…
RENAL CORTEX	110/2316	5.93373e-05	0.000534036	0	0	1.43275	13.9439	APP;EHF;SPON1;TNC;ARHGAP39;FNBP1L;MKI67;CCDC102A;CDH6;SALL1;ZNF608;LURAP1L;PLS3;ZNF205;THSD7A;STK32A;TNS3;BAHCC1;SCARA3;LIMCH1;HNF1B;HSPG2;EDAR;OBSCN;PARD3;SCNN1A;ERF;ROR1;KIF20A;OBSL1;TRABD2B;PDE9A;EPHA2;RAI14;GLIS3;LYPD6;PPL;EVPL;TRHDE;COBLL1;PDGFC;B4GALNT3;OR7E47P;RAB11FIP3;MYH10;SPTBN2;WSCD1;NEBL;DCDC2;HMGA2;ARHGAP24;NR2F6;PTPRD;FAM160A1;MYO5B;PLXNB2;FAT4;AMOTL1;TOP2A;DIDO1;NRP1;THRB;PODXL2;S…
KERATINOCYTE	109/2316	9.31681e-05	0.000774012	0	0	1.41973	13.1766	ERRFI1;EHF;IRS1;TNC;MSANTD3;HSF2BP;ARHGAP39;SLK;LURAP1L;PLS3;ZNF205;CHAC1;TNS4;SCARA3;ZNF282;ARRDC1;KCTD1;ACTN4;EREG;EDAR;CDC34;PARD3;DOK7;SCNN1A;ERF;TRIB3;PKP3;KIF20A;EPHA2;CDCA2;ITPR3;LYPD6;PPL;EVPL;PLCXD2;GRPEL2;B4GALNT3;ZBED6;SPTBN2;BTBD16;HMGA2;NR2F6;ABTB2;EXT1;FAM160A1;ANLN;MYO5B;PLXNB2;AMOTL1;BCAR3;SH2D4A;MTCL1;SLC2A1;ADIRF;SHB;PTPRF;OSBPL10;SIX5;CEP170B;TEAD1;ANXA1;CLUH;PLLP;ITGA3;MYOF;AR…
LUNG (BULK TISSUE)	108/2316	0.000144715	0.00111638	0	0	1.4067	12.4363	ERRFI1;EHF;SPON1;TNC;ARHGAP39;ALCAM;ZNF608;LURAP1L;RPS6KA2;PLS3;SIRPA;STK32A;TNS3;BAHCC1;SLC16A5;TGM2;SCARA3;LIMCH1;MAGI3;HNF1B;LMO7;HSPG2;OBSCN;HECW2;KCNQ1;DOK7;SCNN1A;ROR1;PKP3;TRABD2B;EPHA2;GLIS3;ARHGAP18;ITPR3;LTBP2;PPL;EVPL;TSPAN4;B4GALNT3;OR7E47P;SPTBN1;NEBL;BDNF;ARHGEF38;CRIM1;DCDC2;ARHGAP24;FAM160A1;NCEH1;MYO5B;PLXNB2;FAT4;AMOTL1;LGALS3BP;PIGR;NRP1;DOCK4;SH2D4A;TNFAIP2;ADIRF;SHB;ARHGAP6;P…
INTESTINAL EPITHELIAL CELL	106/2316	0.000337951	0.00243325	0	0	1.38065	11.035	APP;ERRFI1;IRS1;MSANTD3;HSF2BP;ARHGAP39;PLOD1;CCDC102A;SALL1;LURAP1L;ZNF205;CHAC1;EPHB2;TNS3;TGM2;SCARA3;LMO7;ACTN4;HSPG2;CDC34;DOK7;ERF;TRIB3;PKP3;KIF20A;VCL;EPHA2;RAI14;GLIS3;ARHGAP18;LTBP2;LYPD6;TRHDE;RAI1;PDGFC;TSPAN4;OR7E47P;PCDHA7;SMURF2;BDNF;NEK6;BTBD16;CRIM1;MICAL2;HMGA2;ARHGAP24;NR2F6;ABTB2;EXT1;ANLN;NCEH1;PLXNB2;FAT4;BCAR3;ITGB1;LGALS3BP;SH2D4A;MTCL1;SLC2A1;SLC7A11;SHB;PRSS23;ARHGAP6;PT…
KUPFFER CELL	105/2316	0.000508051	0.00342934	0	0	1.36763	10.3733	APP;ERRFI1;TNC;HSF2BP;ARHGAP39;PLOD1;CCDC102A;CDH6;LURAP1L;RPS6KA2;PLS3;SIRPA;ZNF205;CHAC1;STK32A;SCARA3;MBNL2;LMO7;HSPG2;PCDHA11;HECW2;ERF;ROR1;TRIB3;TNIK;KIF20A;TRABD2B;VCL;EPHA2;RAI14;GLIS3;LTBP2;CTIF;RAI1;ABL1;TSPAN4;PCDHA8;MYH10;PCDHA7;PCDHA6;SMAD3;BDNF;NEK6;CRIM1;MICAL2;ARHGAP24;EXT1;ANLN;NCEH1;PLXNB2;FAT4;AMOTL1;BCAR3;ITGB1;LGALS3BP;NRP1;B4GALT1;SH2D4A;MTCL1;SLC7A11;SHB;PRSS23;ARHGAP6;PTPR…
OSTEOBLAST	105/2316	0.000508051	0.00322762	0	0	1.36763	10.3733	ERRFI1;IRS1;TNC;HSF2BP;ARHGAP39;PLOD1;CCDC102A;ALCAM;LURAP1L;RPS6KA2;PLS3;SIRPA;ZNF205;CHAC1;BAHCC1;TGM2;SCARA3;LMO7;HSPG2;HECW2;ERF;ROR1;TRIB3;KIF20A;TRABD2B;VCL;EPHA2;RAI14;GLIS3;ITPR3;LTBP2;CTIF;RAI1;PDGFC;ABL1;TSPAN4;ZBED6;PCDHA7;PCDHA6;SMAD3;ZFHX2;SMURF2;BDNF;NEK6;CRIM1;MICAL2;ARHGAP24;EXT1;ANLN;NCEH1;PLXNB2;FAT4;AMOTL1;BCAR3;ITGB1;SH2D4A;MTCL1;ADIRF;SLC7A11;SHB;PRSS23;AKAP12;SIX5;CEP170B;TE…
HEPATIC STELLATE CELL	104/2316	0.000755424	0.00453254	0	0	1.3546	9.73718	ERRFI1;IRS1;TNC;MSANTD3;HSF2BP;ARHGAP39;PLOD1;MKI67;CCDC102A;ALCAM;LURAP1L;PLS3;ZNF205;CHAC1;TGM2;SCARA3;ZNF282;LMO7;ACTN4;HSPG2;PARD3;ERF;TRIB3;PKP3;KIF20A;VCL;EPHA2;RAI14;CDCA2;ARHGAP18;ITPR3;LYPD6;PCNX3;ARHGAP22;CTIF;RAI1;PDGFC;ABL1;TSPAN4;ABL2;HIVEP2;ZBED6;SMAD3;SMURF2;BDNF;NEK6;SETD1A;CRIM1;MICAL2;HMGA2;ABTB2;EXT1;ANLN;NCEH1;FAT4;AMOTL1;BCAR3;ITGB1;NRP1;SH2D4A;MTCL1;SLC2A1;SLC7A11;SHB;PRSS23…
BREAST (BULK TISSUE)	103/2316	0.00111093	0.00631477	0	0	1.34158	9.12614	EHF;IRS1;TNC;IRS2;ARHGAP39;CCDC102A;CAPN15;LURAP1L;EME2;ZNF205;TNS4;BAHCC1;FAAP100;SCARA3;ZNF282;CEP131;ACTN4;HSPG2;OBSCN;PARD3;KCNQ1;DOK7;SCNN1A;ERF;PKP3;OBSL1;TRABD2B;EPHA2;ITPR3;LTBP2;LYPD6;PPL;EVPL;PCNX3;CTIF;RAI1;RHPN1;ABL1;TSPAN4;TNRC18;B4GALNT3;RAB11FIP3;PCDHA6;SPTBN2;ARHGEF38;SETD1A;NR2F6;ABTB2;FAM160A1;MYO5B;PLXNB2;FAT4;LGALS3BP;PIGR;PODXL2;KIAA1671;TNFAIP2;ADIRF;SHB;SIPA1L3;PTPRF;FAM102…
VASCULAR SMOOTH MUSCLE	103/2316	0.00111093	0.00599903	0	0	1.34158	9.12614	ERRFI1;IRS1;HSF2BP;ARHGAP39;PLOD1;CCDC102A;LURAP1L;RPS6KA2;PLS3;ZNF205;CHAC1;EPHB2;TGM2;SCARA3;LMO7;HSPG2;ERF;ROR1;TRIB3;PKP3;TRABD2B;EPHA2;RAI14;GLIS3;ITPR3;LTBP2;TRHDE;PCNX3;CTIF;RAI1;PDGFC;ABL1;TSPAN4;PCDHA7;PCDHA6;SMAD3;BDNF;CRIM1;MICAL2;ARHGAP24;NR2F6;ABTB2;EXT1;NCEH1;PLXNB2;FAT4;BCAR3;ITGB1;NRP1;B4GALT1;SH2D4A;MTCL1;ADIRF;SLC7A11;SHB;PRSS23;PTPRF;AKAP12;SIX5;CEP170B;TEAD1;ITGA3;ARHGEF17;MYO…
GRANULOSA CELL	101/2316	0.00232408	0.0119524	0	0	1.31553	7.97792	APP;ERRFI1;IRS1;TNC;IRS2;ARHGAP39;PLOD1;CAPN15;ACTG1;ZNF608;LURAP1L;LONP1;ZNF205;THSD7A;STK32A;MAP3K5;FAAP100;PRKCH;MBNL2;SEMA6A;PPTC7;KCTD1;PRKCA;HSPG2;EREG;PARD3;KCNQ1;ERF;ROR1;OBSL1;TRABD2B;VCL;EPHA2;TBC1D9B;ARHGAP18;RASAL2;PPL;PCNX3;CTIF;RAI1;COBLL1;PDGFC;B4GALNT3;ZBED6;RAB11FIP3;PCDHA7;SMAD3;NEBL;BDNF;RDX;ARHGAP24;ABTB2;EXT1;MYO5B;PLXNB2;FAT4;AMOTL1;BCAR3;LGALS3BP;NRP1;B4GALT1;SH2D4A;MTCL1;P…
ESOPHAGUS (BULK TISSUE)	99/2316	0.00465021	0.0228283	0	0	1.28948	6.92557	ERRFI1;EHF;TNC;ARHGAP39;MKI67;SLK;LURAP1L;PLS3;ZNF205;CHAC1;TNS4;SCARA3;ZNF282;MAGI3;KCTD1;LMO7;HSPG2;EDAR;PARD3;SCNN1A;PKP3;KIF20A;TRABD2B;EPHA2;ITPR3;RASAL2;PPL;EVPL;RAI1;COBLL1;GRPEL2;B4GALNT3;ZBED6;SPTBN2;SMAD3;NEBL;BTBD16;NR2F6;ABTB2;FAM160A1;ANLN;MYO5B;PLXNB2;AMOTL1;CPEB3;SH2D4A;KIAA1671;SLC2A1;ADIRF;SHB;PTPRF;FAM102A;SIX5;CEP170B;TEAD1;ANXA1;CLUH;VPS13D;MYOF;ARHGEF16;GAB1;SHROOM2;EMP1;COBL…
GASTRIC TISSUE (BULK)	99/2316	0.00465021	0.0218357	0	0	1.28948	6.92557	ERRFI1;EHF;SPON1;IRS1;TNC;MKI67;LURAP1L;ZNF205;SLC16A5;TGM2;SCARA3;MAGI3;HNF1B;LMO7;HSPG2;EDAR;PARD3;KCNQ1;DOK7;SCNN1A;ROR1;PKP3;TRABD2B;EPHA2;ARHGAP18;ITPR3;LYPD6;PPL;EVPL;KALRN;COBLL1;ABL1;B4GALNT3;OR7E47P;BTBD16;B3GALT5;ARHGAP24;NR2F6;EXT1;FAM160A1;ANLN;LRCH1;MYO5B;PLXNB2;FAT4;MCU;LGALS3BP;PIGR;SH2D4A;PODXL2;MTCL1;ADIRF;SHB;ARHGAP6;PTPRF;FAM102A;SIX5;CEP170B;ME3;TEAD1;ADAMTS9;ABCC3;CLUH;ARHGEF…
LIVER (BULK TISSUE)	99/2316	0.00465021	0.0209259	0	0	1.28948	6.92557	ERRFI1;GDA;HDLBP;MSANTD3;PLOD1;GOLGA4;LIPC;SALL1;RGS3;LURAP1L;LONP1;PLS3;TGM2;MBNL2;HNF1B;LMO7;HSPG2;PARD3;LPAL2;TRIB3;RBCK1;TRABD2B;EPHA2;RAI14;OSER1;GLIS3;PPL;KALRN;CTIF;ALOX12P2;COBLL1;SMAD3;BTBD16;RDX;DCDC2;ARHGAP24;NR2F6;EXT1;MYO5B;AMOTL1;BCAR3;PIGR;DIDO1;NRP1;DOCK4;B4GALT1;SH2D4A;KIAA1671;TNFAIP2;ADIRF;EFCAB5;EFCAB13;SHB;PTPRF;AKAP12;DUSP10;SIX5;AP3S1;TEAD1;ADAMTS9;NDEL1;ABCC3;MYOF;ARHGEF16…
MYOFIBROBLAST	98/2316	0.00646838	0.0279434	0	0	1.27645	6.43437	IRS1;HSF2BP;ARHGAP39;CCDC102A;ACTB;ACTG1;ALCAM;SALL1;LURAP1L;RPS6KA2;SIRPA;ZNF205;CHAC1;TGM2;SCARA3;LIMCH1;CEP131;LMO7;ACTN4;HSPG2;DOK7;ERF;PKP3;KIF20A;TRABD2B;PDE9A;VCL;EPHA2;RAI14;CDCA2;GLIS3;ARHGAP18;LTBP2;LYPD6;TRHDE;CTIF;RAI1;PCDHA1;PDGFC;TSPAN4;OR7E47P;PCDHA8;PCDHA7;SMURF2;BDNF;BTBD16;CRIM1;MICAL2;NR2F6;EXT1;ANLN;NCEH1;PLXNB2;FAT4;SH2D4A;MTCL1;SLC2A1;SLC7A11;SHB;PRSS23;ARHGAP6;SIX5;CEP170B;…
WHARTONS JELLY	98/2316	0.00646838	0.0268687	0	0	1.27645	6.43437	ERRFI1;EHF;IRS1;TNC;MSANTD3;HSF2BP;ARHGAP39;CCDC102A;ALCAM;LURAP1L;PLS3;ZNF205;CHAC1;STK32A;TGM2;SCARA3;LMO7;PARD3;TRIB3;PKP3;KIF20A;VCL;EPHA2;RAI14;CDCA2;ARHGAP18;ITPR3;LYPD6;TRHDE;ARHGAP22;PDGFC;TSPAN4;ZBED6;SMURF2;BDNF;CRIM1;MICAL2;HMGA2;ARHGAP24;NR2F6;EXT1;FAM160A1;ANLN;NCEH1;FAT4;AMOTL1;BCAR3;ITGB1;TOP2A;NRP1;SH2D4A;MTCL1;ADIRF;SHB;PRSS23;KIF15;SIX5;CEP170B;TEAD1;ADAMTS9;ABCC4;PLLP;ITGA3;MYO…
CARDIAC MUSCLE FIBER	95/2316	0.0162739	0.0650956	0	0	1.23738	5.09575	SPON1;IRS1;MTCL1;ARHGAP39;VLDLR;SHB;ARHGAP6;CCDC102A;ZNF608;SIX5;RPS6KA2;MYO18A;CEP170B;PLS3;ZNF205;CHAC1;TEAD1;ADAMTS9;BAHCC1;TGM2;ITGA3;ARHGEF17;CEP131;ARHGEF16;GAB1;SHROOM2;SHROOM3;LMO7;HSPG2;PCDHA11;VCAN;PLCB4;OBSCN;CDC34;PARD3;KCNQ1;DOK7;ERF;ROR1;KIF20A;GPRC5C;OBSL1;TRABD2B;ST6GALNAC5;DBN1;VCL;EPHA2;RAI14;NXN;LRP5;ASAP2;UACA;LYPD6;PPL;THSD4;FAM129B;CTIF;RAI1;ARVCF;FGD6;PCDHA1;CBS;MGAT5;SH3BP…
SMALL INTESTINE (BULK TISSUE)	94/2316	0.0216409	0.0834719	0	0	1.22435	4.69315	PIGR;ERRFI1;EHF;SPON1;IRS1;MTCL1;GDA;TNC;KIAA1671;SHB;MKI67;PTPRF;OSBPL10;AKAP12;ZNF608;LURAP1L;CEP170B;FAM3C;THSD7A;EPHB2;TEAD1;ADAMTS9;TINAG;RALGPS1;TGM2;SCARA3;CLUH;SEMA6A;MORC4;PLLP;MAGI3;ARHGEF17;VPS13D;MYOF;ARHGEF16;GAB1;EMP1;COBL;SHROOM3;HNF1B;LMO7;HSPG2;CD2AP;TGFBR2;EDAR;TBC1D2;CDCP1;PARD3;KCNQ1;PKP3;MET;TRABD2B;ST6GALNAC5;PDE9A;EPHA2;PLEC;GCNT1;LRP5;ARHGAP18;ITPR3;RRBP1;ASAP2;LYPD6;EVPL;…
VENTRICLE	94/2316	0.0216409	0.0805936	0	0	1.22435	4.69315	LGALS3BP;APP;NRP1;SPON1;DOCK4;MAST4;PRKAG2;ADIRF;VLDLR;SHB;ARHGAP6;CCDC102A;SYNE1;RGS3;SIX5;RPS6KA2;MYO18A;CEP170B;ME3;TEAD1;ADAMTS9;BAHCC1;TGM2;CLUH;ZHX3;PPTC7;LIMCH1;ARHGEF17;VPS13D;MYOF;GAB1;EMP1;COBL;LMO7;SDHA;HSPG2;TGFBR2;NCOR2;VCAN;PLCB4;OBSCN;PARD3;HECW2;KCNQ1;ALDH1A2;DOK7;ROR1;OBSL1;TRABD2B;VCL;EPHA2;PLEC;LRP5;LTBP2;KALRN;EGFR;THSD4;CTIF;ARVCF;TMEM245;ATXN1;ABLIM2;ABLIM3;MGAT5;ABL1;FLNA;M…
MELANOCYTE	93/2316	0.0284552	0.102439	0	0	1.21133	4.31162	BCAR3;LGALS3BP;IRS1;MTCL1;MSANTD3;IRS2;PTPRJ;ARHGAP39;JADE2;SHB;MKI67;OSBPL10;AKAP12;ZNF608;SIX5;RPS6KA2;LONP1;CEP170B;SIRPA;ZNF205;CIC;STK32A;TEAD1;TNS3;BAHCC1;FAAP100;CLUH;SEMA6A;ZNF282;PLLP;ITGA3;ARHGEF17;MYOF;CEP131;CTDSPL;SHROOM2;EMP1;HSPG2;CLIP2;CDC34;INCENP;PARD3;ERF;KIF20A;MET;OBSL1;MAD1L1;RAI14;PLEC;PPP1R37;CDCA2;LRP5;NEDD4L;ITPR3;ASAP2;LYPD6;FAM129B;PCNX3;RAI1;ABLIM3;MTHFD1L;SH3TC2;CBS;…
SKIN (BULK TISSUE)	93/2316	0.0284552	0.0991341	0	0	1.21133	4.31162	ERRFI1;EHF;SPON1;THRB;SH2D4A;MAST4;MTCL1;TNC;KIAA1671;SLC2A1;ADIRF;HSF2BP;SHB;PTPRF;LURAP1L;TRPS1;CEP170B;PLS3;TNS4;TEAD1;ADAMTS9;NDEL1;SCARA3;ITGA3;VPS13D;MYOF;ARHGEF16;CTDSPL;SHROOM2;EMP1;COBL;KCTD1;LMO7;HSPG2;EDAR;TBC1D2;CDCP1;PARD3;SCNN1A;PKP3;CLDN16;MET;EPHA2;PLEC;NXN;LRP5;ITPR3;LTBP2;ASAP2;PPL;EVPL;EGFR;THSD4;FAM129B;SCEL;FGD6;ABLIM2;RXRA;ABLIM3;ALOX12P2;COBLL1;HAS3;NHS;SH3BP4;FLNB;ZPLD1;HI…
ATRIUM	91/2316	0.0475608	0.160518	0	0	1.18528	3.61005	SPON1;IRS1;MTCL1;PRKAG2;ADIRF;ARHGAP39;VLDLR;SHB;ARHGAP6;CCDC102A;ZNF608;RGS3;LURAP1L;SIX5;RPS6KA2;CEP170B;ZNF205;CHAC1;TEAD1;ADAMTS9;BAHCC1;SLC16A5;TGM2;SCARA3;CLUH;ARHGEF17;CTDSPL;GAB1;EMP1;LMO7;HSPG2;TGFBR2;VCAN;OBSCN;PARD3;HECW2;KCNQ1;ALDH1A2;DOK7;RARA;ERF;ROR1;GPRC5C;OBSL1;TRABD2B;VCL;EPHA2;PLEC;RBMS3;LRP5;LTBP2;ASAP2;PPL;EGFR;THSD4;FAM129B;CTIF;RAI1;ARVCF;ABLIM3;SH3TC2;MGAT5;TSPAN4;SH3BP4;B…
LUNG EPITHELIAL CELL	91/2316	0.0475608	0.155653	0	0	1.18528	3.61005	BCAR3;TOP2A;LGALS3BP;ERRFI1;EHF;SH2D4A;IRS1;TONSL;HSF2BP;ARHGAP39;SHB;BRCA2;MKI67;CCDC102A;PTPRF;KIF15;LURAP1L;SIX5;RPS6KA2;LONP1;CEP170B;ZNF205;CHAC1;TNS4;TEAD1;SLC16A5;FAAP100;ABCC3;SCARA3;ZNF282;ITGA3;ARHGEF17;CEP131;ARHGEF16;CTDSPL;SHROOM2;COBL;PCDHA11;EEF1A1;TBC1D2;CDCP1;INCENP;PARD3;CANX;DOK7;SCNN1A;TRIB3;RBCK1;PKP3;KIF20A;MET;ST6GALNAC5;EPHA2;CDCA2;UHRF1;NXN;LRP5;FOXK2;ITPR3;MLLT1;LYPD6;PP…
HUMAN EMBRYO	90/2316	0.0604592	0.192047	0	0	1.17225	3.28908	TOP2A;ERRFI1;MTCL1;ITSN1;SLC2A1;MSANTD3;SLC7A11;FNBP1L;BRCA2;MKI67;PPP1R9A;PTPRF;OSBPL10;KIF15;AKAP12;SALL1;ZNF608;PLS3;CHAC1;TEAD1;SUPT16H;SLC38A1;SMARCC1;SEMA6A;NCBP2;SHROOM2;SLC39A10;COBL;SHROOM3;TUBG1;PCDHA11;PCDHA10;CD2AP;FAM234B;VCAN;INCENP;PARD3;NCL;SCNN1A;SMS;ROR1;SNRPF;TNIK;KIF20A;DBN1;PDE9A;VCL;RAI14;CDCA2;CARNMT1;UHRF1;NXN;UACA;LYPD6;FGD6;ALOX12P2;MTHFD1L;CBS;GRPEL2;HAS3;CLSPN;PCDH1;PC…
HAIR FOLLICLE	88/2316	0.0944687	0.291503	0	0	1.1462	2.70445	BCAR3;NRP1;DOCK4;THRB;SH2D4A;IRS1;MTCL1;TNC;ARHGAP39;SLC7A11;SHB;PRSS23;CCDC102A;ZNF608;LURAP1L;SIX5;TRPS1;RPS6KA2;CEP170B;ZNF205;ME3;STK32A;TEAD1;BAHCC1;SLC16A5;ABCC4;SCARA3;ZHX3;PLLP;ITGA3;ARHGEF17;MYOF;EMP1;LMO7;HSPG2;VCAN;TBC1D2;PLCB4;HECW2;TRIB3;PKP3;OBSL1;ST6GALNAC5;VCL;EPHA2;PLEC;RBMS3;NXN;GLIS3;LRP5;ITPR3;LTBP2;ASAP2;LYPD6;PPL;TRHDE;EGFR;THSD4;FAM129B;CTIF;CBS;PDGFC;ABL1;NHS;TSPAN4;SH3BP4…
PERICARDIUM	87/2316	0.116128	0.348385	0	0	1.13318	2.43979	ERRFI1;SPON1;SH2D4A;IRS1;MTCL1;IRS2;HSF2BP;ARHGAP39;PLOD1;SHB;PRSS23;ARHGAP6;CCDC102A;AKAP12;LURAP1L;SIX5;TRPS1;RPS6KA2;ZNF205;CHAC1;TEAD1;ADAMTS9;BAHCC1;FAAP100;SCARA3;ZHX3;PLLP;ARHGEF17;MYOF;SHROOM2;EMP1;HSPG2;TGFBR2;CDC34;PARD3;ALDH1A2;RARA;ERF;ROR1;TRIB3;PKP3;OBSL1;TRABD2B;ST6GALNAC5;DBN1;EPHA2;RAI14;PLEC;RBMS3;GLIS3;LRP5;ITPR3;LTBP2;ASAP2;LYPD6;PPL;EGFR;THSD4;FAM129B;CTIF;ABLIM3;CBS;TSPAN4;S…
COLON (BULK TISSUE)	86/2316	0.141183	0.412103	0	0	1.12015	2.19291	LGALS3BP;PIGR;ERRFI1;EHF;SPON1;SH2D4A;TNC;KIAA1671;ADIRF;ARHGAP39;SHB;CAPN15;PTPRF;FAM102A;LURAP1L;SIX5;CEP170B;EPHB2;TNS4;ADAMTS9;TINAG;SLC16A5;TGM2;ABCC3;SCARA3;CLUH;ITGA3;MYOF;ARHGEF16;EMP1;COBL;SHROOM3;HNF1B;LMO7;HSPG2;CD2AP;TGFBR2;EDAR;TBC1D2;PLCB4;CDCP1;KCNQ1;SCNN1A;PKP3;GPRC5C;MET;MGLL;TRABD2B;PDE9A;EPHA2;PLEC;LRP5;ITPR3;RRBP1;ASAP2;LYPD6;EVPL;EGFR;FAM129B;SCEL;ABLIM2;HAS3;SH3BP4;FLNB;B4GA…
FORESKIN FIBROBLAST	86/2316	0.141183	0.401258	0	0	1.12015	2.19291	ITGB1;NRP1;SH2D4A;IRS1;MTCL1;TNC;HDLBP;ADIRF;MSANTD3;PLOD1;SLC7A11;PRSS23;AKAP12;ALCAM;SALL1;DUSP10;TRPS1;PLS3;CHAC1;STK32A;TNS4;TEAD1;TNS3;KIRREL3;ABCC4;SCARA3;ANXA1;MBNL2;ZHX3;MORC4;ITGA3;LIMCH1;MYOF;PLAUR;EMP1;SHROOM3;PRKCA;HNF1B;LMO7;HSPG2;NAALADL2;ASPH;MET;GAPDH;MGLL;VCL;RAI14;RBMS3;NXN;GLIS3;ARHGAP18;ASAP1;LTBP2;TFPI;UACA;TRHDE;EGFR;THSD4;FAM129B;CTIF;FUT8;ATXN1;ABLIM3;MTHFD1L;SH3TC2;COBLL1…
BETA CELL	85/2316	0.169768	0.470128	0	0	1.10713	1.96329	APP;ERRFI1;EHF;PODXL2;MAST4;MTCL1;GDA;ARHGAP39;VLDLR;FNBP1L;SHB;PPP1R9A;SIPA1L3;PTPRF;FAM102A;DUSP10;ZNF608;LURAP1L;ZMIZ1;CEP170B;ME3;THSD7A;TEAD1;BAHCC1;RALGPS1;SEMA6A;ZHX3;ARHGEF17;ARHGEF16;SHROOM2;COBL;SHROOM3;HNF1B;PCDHA11;NCOR2;PLCB4;CDCP1;PARD3;ERF;ROR1;TRIB3;PKP3;GPRC5C;OBSL1;ST6GALNAC5;GLIS3;LRP5;PPL;EVPL;PLCXD2;RAI1;ARVCF;ABLIM2;PCDHA1;ALOX12P2;COBLL1;RHPN1;FLNB;ZPLD1;B4GALNT3;PCDH1;ZBED…
STROMAL CELL	85/2316	0.169768	0.458374	0	0	1.10713	1.96329	BCAR3;ERRFI1;NRP1;SH2D4A;IRS1;MTCL1;TNC;HSF2BP;ARHGAP39;PLOD1;PRSS23;ARHGAP6;CCDC102A;ZNF608;LURAP1L;SIX5;RPS6KA2;CEP170B;ZNF205;CHAC1;TEAD1;BAHCC1;SCARA3;ZHX3;ZNF282;ARHGEF17;MYOF;EMP1;LMO7;TTC7A;HSPG2;TGFBR2;INCENP;PARD3;ERF;ROR1;TRIB3;PKP3;TRABD2B;DBN1;RAI14;GCNT1;GLIS3;LRP5;ITPR3;RRBP1;LTBP2;ASAP2;PPL;TRHDE;EGFR;THSD4;FAM129B;CTIF;RAI1;ABLIM3;MTHFD1L;CBS;HAS3;ABL1;TSPAN4;SH3BP4;FLNA;ZBED6;RAB…
ENDOMETRIUM (BULK)	84/2316	0.20193	0.531912	0	0	1.0941	1.75038	DIDO1;ERRFI1;NRP1;EHF;SPON1;SH2D4A;IRS1;MTCL1;TNC;ZBTB20;EFCAB13;PRSS23;ARHGAP6;BICD1;AKAP12;SALL1;LURAP1L;TRPS1;THSD7A;TEAD1;ADAMTS9;MAP3K5;TGM2;SCARA3;MBNL2;ZHX3;ARHGEF17;VPS13D;MYOF;SHROOM2;SHROOM3;PRKCA;HSPG2;NAALADL2;VCAN;PARD3;ALDH1A2;ROR1;MET;ST6GALNAC5;VCL;RAI14;MACF1;NXN;GLIS3;ITPR3;LTBP2;ASAP2;TFPI;UACA;LYPD6;TRHDE;EGFR;THSD4;ATXN1;ABLIM3;PDGFC;NHS;SH3BP4;HIVEP2;ZBED6;OR7E47P;PCDHA8;PCD…
FETAL BRAIN CORTEX	84/2316	0.20193	0.519247	0	0	1.0941	1.75038	PIGR;DOCK4;RBM25;C2CD3;CHD9;ZMYND8;ITSN1;EFCAB5;FNBP1L;PPP1R9A;PRSS23;BICD1;ACTB;ACTG1;CDH6;AKAP12;SUMO1;DLEU1;MACROD2;ERC1;THSD7A;SPTAN1;SLC38A1;SEMA6A;MORC4;PLLP;LIMCH1;ADAM10;PRKCA;TSC1;INIP;PCDHA10;SUMF1;TIAM2;MORF4L1;FAM234B;RILPL1;THRAP3;HECW2;LPAL2;EZR;RAI14;CREB5;FTO;ARL3;NEDD4L;RASAL2;ASAP2;TFPI;MLLT3;KALRN;SKA2;UBN2;PDGFC;ANKRD10;SRGAP3;PDE6A;PCDHA9;SRGAP1;MYH10;NKTR;BPTF;CA12;ATF7IP;ZN…
CHONDROCYTE	81/2316	0.318708	0.800475	0	0	1.05503	1.2064	ERRFI1;SH2D4A;IRS1;MTCL1;TNC;ADIRF;MSANTD3;EFCAB13;HSF2BP;SLC7A11;SHB;MKI67;PRSS23;CCDC102A;OSBPL10;SYNE1;AKAP12;LURAP1L;TRPS1;RPS6KA2;PLS3;SIRPA;STK32A;TEAD1;ADAMTS9;SCARA3;ANXA1;MYOF;EMP1;LMO7;HSPG2;TIAM2;TBC1D2;ASPH;ALDH1A2;ROR1;KIF20A;MET;TRABD2B;EPHA2;RAI14;CREB5;PLEC;RBMS3;CDCA2;GLIS3;ITPR3;LTBP2;ASAP2;UACA;EGFR;FAM129B;COBLL1;PDGFC;HAS3;NHS;ZPLD1;HIVEP2;B4GALNT3;ZBED6;PCDHA6;CA12;NEBL;BDNF…
FETAL BRAIN	81/2316	0.318708	0.782283	0	0	1.05503	1.2064	TOP2A;SPON1;PODXL2;MTCL1;TNC;HSF2BP;ARHGAP39;FNBP1L;SHB;MKI67;BICD1;KIF15;ACTG1;SALL1;ZNF608;SIX5;CEP170B;ZNF205;THSD7A;CIC;EPHB2;TEAD1;BAHCC1;RALGPS1;SCARA3;SEMA6A;ARHGEF17;CEP131;GAB1;SHROOM2;SHROOM3;PCDHA11;CLIP2;INCENP;ERF;KIF20A;OBSL1;ST6GALNAC5;DBN1;PDE9A;EPHA2;CDCA2;UHRF1;GLIS3;LRP5;MLLT1;ASAP2;LYPD6;KALRN;EGFR;RAI1;ARVCF;PCDHA1;CBS;RHPN1;ABL1;SH3BP4;TNRC18;PCDH1;PCDHA8;RAB11FIP3;PCDHA7;PC…
PREFRONTAL CORTEX	81/2316	0.318708	0.764899	0	0	1.05503	1.2064	NRP1;DOCK4;RBM25;THRB;GDA;CHD9;ZMYND8;ITSN1;TNC;ZBTB20;EFCAB5;VLDLR;FNBP1L;PPP1R9A;BICD1;SYNE1;CDH6;AKAP12;SALL1;ZNF608;MACROD2;THSD7A;ADAMTS9;SPTAN1;RALGPS1;SEMA6A;MORC4;PLLP;LIMCH1;SLC39A10;KCTD1;PRKCA;TSC1;PCDHA10;TIAM2;FAM234B;VCAN;RILPL1;ST6GALNAC5;CREB5;FTO;NEDD4L;RASAL2;TFPI;MLLT3;KALRN;KIAA0513;FUT8;PCDHA1;GNG7;UBN2;ANKRD10;SRGAP3;PDE6A;PCDHA8;SRGAP1;MYH10;PCDHA7;NKTR;BPTF;SPEN;ZNF462;MGE…
SKELETAL MUSCLE SATELLITE CELL	81/2316	0.318708	0.748271	0	0	1.05503	1.2064	ERRFI1;NRP1;SH2D4A;IRS1;MTCL1;TNC;HSF2BP;ARHGAP39;PLOD1;SHB;ARHGAP6;CCDC102A;CAPN15;OSBPL10;AKAP12;LURAP1L;SIX5;TRPS1;RPS6KA2;CEP170B;ZNF205;CHAC1;TEAD1;SCARA3;CLUH;ZHX3;PLLP;ITGA3;MYOF;EMP1;HSPG2;TGFBR2;TBC1D2;ASPH;INCENP;DOK7;ROR1;TRIB3;PKP3;KIF20A;MET;DBN1;EPHA2;RAI14;PLEC;CDCA2;GLIS3;ARHGAP18;ITPR3;LTBP2;ASAP2;TFPI;PPL;EGFR;THSD4;FAM129B;ARHGAP22;ABLIM3;CBS;PDGFC;ABL1;TSPAN4;SH3BP4;FLNA;ABL2;…
TRACHEA (BULK TISSUE)	81/2316	0.318708	0.73235	0	0	1.05503	1.2064	BCAR3;NRP1;EHF;SH2D4A;IRS1;TNC;ADIRF;HSF2BP;SLC7A11;SHB;CCDC102A;TRIOBP;LIPC;ZNF608;LURAP1L;SIX5;CEP170B;ZNF205;TNS4;ADAMTS9;SCARA3;PLLP;ITGA3;ARHGEF17;MYOF;CEP131;ARHGEF16;SHROOM3;LMO7;HSPG2;VCAN;TBC1D2;CDCP1;PARD3;DOK7;TRIB3;PKP3;MET;TRABD2B;EPHA2;PLEC;GLIS3;LRP5;ITPR3;LTBP2;ASAP2;PPL;EVPL;TRHDE;EGFR;THSD4;FAM129B;SCEL;ABLIM3;MTHFD1L;CBS;HAS3;SH3BP4;FLNA;FLNB;ZPLD1;PCDH1;ZBED6;OR7E47P;SPTBN2;CA…
RESPIRATORY SMOOTH MUSCLE	79/2316	0.41024	0.92304	0	0	1.02898	0.91683	ERRFI1;SPON1;SH2D4A;IRS1;MTCL1;TNC;ADIRF;HSF2BP;ARHGAP39;PLOD1;SHB;PRSS23;ARHGAP6;CCDC102A;TRIOBP;CDH6;AKAP12;LURAP1L;SIX5;RPS6KA2;CEP170B;SIRPA;ZNF205;CHAC1;TEAD1;BAHCC1;TGM2;SCARA3;ZHX3;ARHGEF17;MYOF;EMP1;HSPG2;TGFBR2;ERF;ROR1;TRIB3;TRABD2B;RAI14;NXN;GLIS3;LRP5;ITPR3;LTBP2;PPL;TRHDE;EGFR;THSD4;FAM129B;CTIF;ABLIM3;MTHFD1L;PDGFC;ABL1;NHS;TSPAN4;SH3BP4;OR7E47P;RAB11FIP3;PCDHA7;CA12;SVIL;SMAD3;BDNF…
KIDNEY (BULK TISSUE)	77/2316	0.507661	1	0	0	1.00293	0.679924	TOP2A;THRB;PODXL2;MAST4;RRP1;TNC;HDLBP;HMGB2;NUCKS1;MKI67;CAPN15;PTPRF;CDH6;AKAP12;RPS14;SALL1;SUMO1;SIX5;LONP1;RPL35;PLS3;AP3S1;TINAG;EIF5B;CLUH;DDX54;HNF1B;ACTN4;TUBG1;SDHA;EEF1A1;CDC34;NCL;ALDH1A2;SMS;SNRPF;KIF20A;CLDN16;MET;UBA52;THOP1;TRABD2B;DBN1;TRABD;UHRF1;PNKP;NEDD4L;UQCR11;METTL21A;TCOF1;MTHFD1L;U2AF2;CBS;SRGAP1;SPTBN2;NEK8;CA12;HSPA4;MACC1;CBX1;SGTA;DCDC2;KCNJ16;DEK;EEF2;BICC1;NR2F6;CE…
OLIGODENDROCYTE	77/2316	0.507661	1	0	0	1.00293	0.679924	TOP2A;PIGR;PODXL2;IRS1;MTCL1;TNC;ARHGAP39;VLDLR;SHB;MKI67;PRSS23;KIF15;ACTG1;ALCAM;SALL1;ZNF608;SIX5;RPS6KA2;ZNF205;THSD7A;STK32A;EPHB2;TEAD1;BAHCC1;SCARA3;ITGA3;LIMCH1;ARHGEF17;MYOF;SHROOM2;EMP1;COBL;SHROOM3;PCDHA11;INCENP;DOK7;SMS;KIF20A;ST6GALNAC5;DBN1;EPHA2;CDCA2;NXN;GLIS3;LYPD6;EGFR;FAM129B;ARVCF;PDGFC;HAS3;NHS;SH3BP4;FLNA;B4GALNT3;PCDH1;ZBED6;PCDHA8;MYH10;PCDHA7;PCDHA6;SPTBN2;KCNIP1;WSCD1;N…
MAMMARY GLAND	76/2316	0.556833	1	0	0	0.9899	0.579577	IRS1;ADIRF;HSF2BP;ARHGAP39;SHB;CAPN15;PTPRF;FAM102A;LURAP1L;EME2;SIX5;TRPS1;CEP170B;ZNF205;BAHCC1;CLUH;ZNF282;ARRDC1;MYOF;CEP131;ARHGEF16;SHROOM2;COBL;DDX54;SHROOM3;PCDHA11;PCDHA10;DOK7;RARA;ERF;TRIB3;PKP3;GPRC5C;OBSL1;EPHA2;PLEC;PPP1R37;LRP5;ITPR3;LYPD6;PPL;EVPL;THSD4;FAM129B;PCNX3;RAI1;ARVCF;RXRA;PCDHA1;ABLIM3;ALOX12P2;RHPN1;NHS;TNRC18;B4GALNT3;PCDH1;PCDHA8;RAB11FIP3;PCDHA7;PCDHA6;SPTBN2;CA12;N…
RETINA	75/2316	0.60532	1	0	0	0.976875	0.490389	ERRFI1;SPON1;THRB;SH2D4A;PODXL2;MTCL1;SLC2A1;HSF2BP;ARHGAP39;PPP1R9A;PTPRF;AKAP12;ZNF608;LURAP1L;RPS6KA2;CEP170B;ZNF205;ME3;THSD7A;STK32A;TEAD1;SCARA3;LIMCH1;MAGI3;ARHGEF17;ARHGEF16;SHROOM2;COBL;SHROOM3;PCDHA11;BTD;INCENP;PARD3;MET;OBSL1;ST6GALNAC5;EPHA2;RAI14;ASAP2;LYPD6;PLCXD2;TRHDE;EGFR;ABLIM2;PCDHA1;ABLIM3;SH3TC2;COBLL1;NHS;ZPLD1;PDE6A;PCDH1;PCDHA8;PCDHA7;PCDHA6;SPTBN2;PRELID2;KCNIP1;BDNF;PCD…
ALVEOLAR CELL TYPE II	74/2316	0.6524	1	0	0	0.96385	0.411658	PIGR;ERRFI1;EHF;SH2D4A;TNC;ADIRF;SLC7A11;SHB;PPP1R9A;LURAP1L;CEP170B;MACROD2;CHAC1;STK32A;EPHB2;TEAD1;ADAMTS9;ABCC4;MORC4;PLLP;ITGA3;MYOF;ARHGEF16;PLAUR;EMP1;COBL;SHROOM3;LMO7;CD2AP;TBC1D2;CDCP1;PARD3;LPAL2;SCNN1A;ROR1;TRIB3;PKP3;CLDN16;GPRC5C;MET;MGLL;EPHA2;FTO;GLIS3;ITPR3;TFPI;METTL21A;PPL;EVPL;EGFR;FAM129B;ARHGAP22;SCEL;ALOX12P2;COBLL1;HAS3;ZPLD1;PCDHA9;B4GALNT3;PCDH1;NEBL;MACC1;ARHGEF38;DCDC2…
PREADIPOCYTE	74/2316	0.6524	1	0	0	0.96385	0.411658	TOP2A;NRP1;IRS1;MTCL1;TNC;ADIRF;ARHGAP39;SHB;BRCA2;MKI67;ARHGAP6;CCDC102A;CAPN15;TRIOBP;KIF15;AKAP12;LURAP1L;SIX5;TRPS1;RPS6KA2;CEP170B;ZNF205;TEAD1;SCARA3;CLUH;ZHX3;PLLP;MYOF;EMP1;HSPG2;TGFBR2;VCAN;TBC1D2;INCENP;PARD3;ROR1;KIF20A;RAI14;PLEC;CDCA2;GLIS3;LRP5;ITPR3;ASAP2;TFPI;PPL;EGFR;THSD4;FAM129B;ARHGAP22;ABLIM3;CBS;ABL1;TSPAN4;SH3BP4;FLNA;ABL2;ZBED6;CA12;SVIL;TMED7-TICAM2;HMGA2;BICC1;ARHGAP24;D…
ADRENAL GLAND	73/2316	0.697405	1	0	0	0.950825	0.342668	NRP1;SPON1;SH2D4A;PODXL2;IRS1;IRS2;ARHGAP39;PPP1R9A;CCDC102A;SYNE1;ZNF608;LURAP1L;SIX5;LONP1;ZNF205;ME3;THSD7A;CIC;STK32A;ADAMTS9;BAHCC1;MAP3K5;CLUH;SEMA6A;PLLP;LIMCH1;ARHGEF17;SHROOM2;PRKCA;HSPG2;TGFBR2;ASPH;PARD3;KCNQ1;ALDH1A2;OBSL1;TRABD2B;ST6GALNAC5;AHDC1;EPHA2;PLEC;RBMS3;LRP5;ARHGAP18;KALRN;EGFR;THSD4;FAM129B;PCNX3;CTIF;SCEL;ARVCF;TMEM245;ABLIM2;COBLL1;PCED1B;NHS;FLNB;B4GALNT3;ZBED6;SPTBN1;S…
HEPATOCYTE	73/2316	0.697405	1	0	0	0.950825	0.342668	DIDO1;ERRFI1;EHF;THRB;SH2D4A;IRS1;ADIRF;ARHGAP39;SHB;PTPRF;LIPC;SALL1;LURAP1L;SIX5;CEP170B;ZNF205;IKBKG;FAAP100;TGM2;ABCC3;SCARA3;CLUH;ZNF282;CEP131;ARHGEF16;SHROOM2;COBL;HNF1B;HSPG2;TBC1D2;CDC34;BTD;PARD3;LPAL2;DOK7;RARA;ERF;TRIB3;RBCK1;GPRC5C;MET;TRABD2B;EPHA2;LRP5;RRBP1;PPL;EGFR;CTIF;ARVCF;RXRA;ABLIM3;CBS;TSPAN4;SH3BP4;PCDH1;SPTBN2;NEK6;BTBD16;DAB2IP;DCDC2;PLEKHA6;BAIAP2;NR2F6;ABTB2;EXT1;SPSB1…
MOTOR NEURON	73/2316	0.697405	1	0	0	0.950825	0.342668	APP;SPON1;PODXL2;IRS1;MTCL1;ARHGAP39;FNBP1L;BICD1;PTPRF;ACTG1;CDH6;AKAP12;SALL1;ZNF608;CEP170B;ZNF205;CHAC1;THSD7A;STK32A;EPHB2;SPTAN1;BAHCC1;RALGPS1;SEMA6A;ARHGEF17;SHROOM2;PCDHA11;CLIP2;OBSL1;TRABD2B;ST6GALNAC5;DBN1;PDE9A;EPHA2;RAI14;GLIS3;LRP5;ASAP2;LYPD6;KALRN;PLCXD2;CTIF;RAI1;ARVCF;ABLIM2;PCDHA1;NHS;SH3BP4;SRGAP3;B4GALNT3;PCDH1;PCDHA8;MYH10;PCDHA7;PCDHA6;SPTBN2;ZFHX2;KCNIP1;WSCD1;PCDH7;DAB2I…
ADIPOSE (BULK TISSUE)	72/2316	0.73975	1	0	0	0.9378	0.282693	LGALS3BP;ERRFI1;NRP1;SPON1;THRB;SH2D4A;IRS1;ITSN1;ADIRF;VLDLR;ARHGAP6;CCDC102A;PTPRF;AKAP12;LURAP1L;SIX5;RPS6KA2;CEP170B;PLS3;SIRPA;ZNF205;ME3;STK32A;TEAD1;ADAMTS9;BAHCC1;SCARA3;ANXA1;CLUH;LIMCH1;ARHGEF17;MYOF;ARHGEF16;EMP1;HSPG2;TGFBR2;BTD;ASPH;ALDH1A2;ERF;MGLL;TRABD2B;EPHA2;RBMS3;LRP5;LTBP2;PPL;TRHDE;EGFR;CTIF;ABLIM2;RXRA;ABLIM3;COBLL1;PDGFC;NHS;TSPAN4;PCDH1;SPTBN1;DAB2IP;CRIM1;NMNAT2;ARHGAP24;…
SKELETAL MUSCLE (BULK TISSUE)	70/2316	0.814691	1	0	0	0.91175	0.18686	THRB;IRS1;KIAA1671;ADIRF;VLDLR;ARHGAP6;RPS6KA2;MYO18A;ZNF205;ME3;TEAD1;ADAMTS9;TINAG;CLUH;ZHX3;PPTC7;LIMCH1;ARHGEF17;VPS13D;COBL;LMO7;HSPG2;OBSCN;RILPL1;PARD3;ALDH1A2;DOK7;GPRC5C;MET;OBSL1;TRABD2B;PLEC;NXN;LRP5;LTBP2;UACA;PPL;KALRN;EGFR;ARVCF;ABLIM2;RXRA;ABLIM3;HIVEP2;MAP4;PCDH1;OR7E47P;RAB11FIP3;SVIL;USP25;SMAD3;WSCD1;BTBD16;DAB2IP;PPP2R3A;MPP7;ARHGAP24;NR2F6;ABTB2;FAM160A1;SPSB1;OGDH;TMCC2;FAT4…
MIDBRAIN	69/2316	0.846716	1	0	0	0.898725	0.149539	TOP2A;SETD5;SPON1;RBM25;CHD9;ITSN1;SLC2A1;ZBTB20;IRS2;NUCKS1;FNBP1L;PPP1R9A;PTPRF;ACTG1;CDH6;RPS14;SALL1;ZMIZ1;RPL35;THSD7A;EPHB2;SEC62;TEAD1;SKP1;KIRREL3;EIF5B;SEMA6A;LIMCH1;PCDHA10;NAALADL2;EEF1A1;MORF4L1;SNRPF;CLDN16;UBA52;LUC7L2;RBMS3;FTO;ARL3;NEDD4L;RASAL2;MLLT3;KLC1;UACA;KALRN;SKA2;SRGAP3;PCDHA9;ZC3H13;SRGAP1;FNIP2;MYH10;BPTF;ZNF462;KCNIP1;HSPA4;PCDH7;RDX;KCNJ16;HMGA2;NMNAT2;MAPK10;PTPRD;IR…
SPINAL CORD	69/2316	0.846716	1	0	0	0.898725	0.149539	SPON1;DOCK4;PODXL2;ARHGAP39;PPP1R9A;AKAP12;SALL1;ZNF608;CEP170B;THSD7A;STK32A;ADAMTS9;SPTAN1;BAHCC1;RALGPS1;SCARA3;SEMA6A;LIMCH1;MAGI3;ARHGEF17;SHROOM2;PCDHA11;CLIP2;PARD3;ALDH1A2;TNIK;OBSL1;TRABD2B;ST6GALNAC5;LRP5;ASAP2;LYPD6;KALRN;EGFR;CTIF;RAI1;ARVCF;ABLIM2;PCDHA1;ABLIM3;SPOCK2;RHPN1;NHS;SH3BP4;SRGAP3;PCDH1;PCDHA8;RAB11FIP3;PCDHA7;PCDHA6;SPTBN2;ZFHX2;KCNIP1;WSCD1;NEBL;PCDH7;DAB2IP;PLEKHA6;NMNA…
SPINAL CORD (BULK)	69/2316	0.846716	1	0	0	0.898725	0.149539	SPON1;DOCK4;PODXL2;ARHGAP39;PPP1R9A;AKAP12;SALL1;ZNF608;CEP170B;THSD7A;STK32A;ADAMTS9;SPTAN1;BAHCC1;RALGPS1;SCARA3;SEMA6A;LIMCH1;MAGI3;ARHGEF17;SHROOM2;PCDHA11;CLIP2;PARD3;ALDH1A2;TNIK;OBSL1;TRABD2B;ST6GALNAC5;LRP5;ASAP2;LYPD6;KALRN;EGFR;CTIF;RAI1;ARVCF;ABLIM2;PCDHA1;ABLIM3;SPOCK2;RHPN1;NHS;SH3BP4;SRGAP3;PCDH1;PCDHA8;RAB11FIP3;PCDHA7;PCDHA6;SPTBN2;ZFHX2;KCNIP1;WSCD1;NEBL;PCDH7;DAB2IP;PLEKHA6;NMNA…
CINGULATE GYRUS	68/2316	0.874949	1	0	0	0.8857	0.11832	APP;SPON1;DOCK4;THRB;PODXL2;GDA;ADIRF;IRS2;ARHGAP39;PPP1R9A;BICD1;SYNE1;AKAP12;SALL1;CEP170B;SIRPA;ME3;FAM3C;THSD7A;ADAMTS9;SPTAN1;SCARA3;MBNL2;LIMCH1;MAGI3;SHROOM2;COBL;PCDHA11;FAM234B;HECW2;ST6GALNAC5;ATP6V1A;KLC1;LYPD6;KALRN;TRHDE;EGFR;KIAA0513;CTIF;ARVCF;ABLIM2;PCDHA1;SPOCK2;NHS;SRGAP3;HIVEP2;PCDH1;PCDHA8;PCDHA7;SPTBN1;PCDHA6;SPTBN2;KCNIP1;NEBL;PCDH7;PLEKHA6;NMNAT2;BAIAP2;OXR1;MAPK10;PTPRD;AN…
PANCREATIC ISLET	68/2316	0.874949	1	0	0	0.8857	0.11832	ITGB1;LGALS3BP;PIGR;EHF;MAST4;GDA;ZBTB20;VLDLR;FNBP1L;PPP1R9A;SIPA1L3;PTPRF;CDH6;GOLGA4;ALCAM;DLEU1;MACROD2;SEC62;SKP1;KIRREL3;MBNL2;MORC4;LIMCH1;SARS;HNF1B;THOC2;PCDHA10;NAALADL2;MORF4L1;PLCB4;CDCP1;ASPH;RILPL1;THRAP3;SCNN1A;EZR;FTO;ARL3;GCNT1;UQCR11;PPL;PLCXD2;FUT8;COBLL1;ZPLD1;SRGAP3;PDE6A;PCDHA9;NDUFV2;SRGAP1;MYH10;ZNF462;UBE2B;NEBL;MACC1;EYA3;DCDC2;PLEKHA6;NMNAT2;B3GALT5;MAPK10;RSPH3;IRGQ;AN…
NEURONAL PROGENITOR CELLS	67/2316	0.899426	1	0	0	0.872675	0.0925026	TOP2A;ZMYND8;HMGB2;FNBP1L;BRCA2;MKI67;PPP1R9A;PTPRF;KIF15;CDH6;AKAP12;SALL1;ZNF608;PLS3;EPHB2;TNS4;TEAD1;ADAMTS9;SEMA6A;SLC39A10;SHROOM3;KCTD1;TUBG1;PCDHA10;RAD51B;EEF1A1;MORF4L1;FAM234B;PARD3;SCNN1A;ROR1;KIF20A;CLDN16;GAPDH;PDE9A;CDCA2;UHRF1;NXN;ARL3;SKA2;ALOX12P2;SH3TC2;CBS;ANKRD10;CLSPN;PCDHA9;MYH10;PRELID2;ZNF462;STIL;WSCD1;NEBL;PCDH7;CBX1;HMGA2;DCBLD2;MAPK10;PTPRD;ANLN;CENPF;FMNL2;ZNF618;NAS…
OMENTUM	67/2316	0.899426	1	0	0	0.872675	0.0925026	LGALS3BP;ERRFI1;SPON1;THRB;TNFAIP2;ADIRF;SHB;ARHGAP6;CCDC102A;PTPRF;AKAP12;LURAP1L;SIX5;CEP170B;SIRPA;THSD7A;TEAD1;ADAMTS9;TGM2;SCARA3;ARHGEF17;MYOF;EMP1;HSPG2;PCDHA11;TGFBR2;PARD3;KCNQ1;ALDH1A2;RARA;ERF;ROR1;CLDN16;MET;OBSL1;TRABD2B;EPHA2;GLIS3;LRP5;LTBP2;LYPD6;PPL;EVPL;EGFR;THSD4;FAM129B;CTIF;SCEL;ABLIM2;ABLIM3;SPOCK2;COBLL1;PDGFC;TSPAN4;SH3BP4;PCDH1;PCDHA6;DAB2IP;ARHGAP24;SPSB1;DLC1;CD9;FAT4;C…
SUBCUTANEOUS ADIPOSE TISSUE	67/2316	0.899426	1	0	0	0.872675	0.0925026	LGALS3BP;NRP1;SPON1;THRB;IRS1;ITSN1;ADIRF;VLDLR;ARHGAP6;CCDC102A;PTPRF;LURAP1L;SIX5;RPS6KA2;CEP170B;PLS3;SIRPA;ZNF205;ME3;STK32A;TEAD1;ADAMTS9;BAHCC1;SCARA3;ANXA1;CLUH;LIMCH1;ARHGEF17;MYOF;ARHGEF16;EMP1;HSPG2;TGFBR2;BTD;ASPH;ALDH1A2;IL3RA;MGLL;TRABD2B;EPHA2;LRP5;LTBP2;PPL;TRHDE;EGFR;CTIF;ABLIM2;RXRA;ABLIM3;COBLL1;TSPAN4;PCDH1;PCDHA7;BTBD16;DAB2IP;CRIM1;NMNAT2;ARHGAP24;NR2F6;MAPK10;SPSB1;TNIP1;DLC…
CEREBELLUM	64/2316	0.952156	1	0	0	0.8336	0.0408686	SPON1;DOCK4;PODXL2;TNC;ZBTB20;EFCAB5;FNBP1L;PPP1R9A;BICD1;SYNE1;ZNF608;LURAP1L;TRPS1;ME3;THSD7A;STK32A;EPHB2;ADAMTS9;BAHCC1;RALGPS1;SEMA6A;PLLP;GAB1;SHROOM2;SHROOM3;PCDHA11;PCDHA10;CLIP2;VCAN;PLCB4;OBSCN;HECW2;ST6GALNAC5;ASAP2;LYPD6;KALRN;PLCXD2;TRHDE;EGFR;ARVCF;PCDHA1;ABLIM3;SPOCK2;PCDHA9;PCDH1;PCDHA8;PCDHA7;PCDHA6;SPTBN2;CA12;ZFHX2;WSCD1;PCDH7;DAB2IP;NMNAT2;MAPK10;EXT1;PTPRD;NFIB;FAT4;AMOTL1;CP…
CEREBRAL CORTEX	62/2316	0.973043	1	0	0	0.80755	0.0220679	DOCK4;THRB;MTCL1;ITSN1;ZBTB20;ADIRF;NUCKS1;PPP1R9A;BICD1;AKAP12;SALL1;ZNF608;CEP170B;SIRPA;MACROD2;THSD7A;KIRREL3;SCARA3;LIMCH1;MAGI3;ARHGEF17;SHROOM2;COBL;PLCB4;PARD3;TNIK;ST6GALNAC5;AHDC1;NEDD4L;ASAP2;LYPD6;KALRN;TRHDE;EGFR;CTIF;ABLIM2;PCDHA1;ABLIM3;SPOCK2;ZNHIT6;NHS;SRGAP3;HIVEP2;ZC3H13;SPTBN2;ZFHX2;KCNIP1;WSCD1;NEBL;PCDH7;BTBD16;KCNJ16;PLEKHA6;NMNAT2;BAIAP2;MAPK10;PTPRD;ANLN;FMNL2;TMCC2;CDR2L…
BRAIN (BULK)	61/2316	0.980258	1	0	0	0.794525	0.0158422	APP;DOCK4;THRB;PODXL2;MTCL1;GDA;ARHGAP39;SALL1;LURAP1L;CEP170B;SIRPA;STK32A;BAHCC1;KIRREL3;SCARA3;LIMCH1;ARHGEF17;SHROOM2;COBL;PCDHA11;CLIP2;PLCB4;DOK7;ST6GALNAC5;LYPD6;KALRN;TRHDE;KIAA0513;CTIF;ARVCF;ABLIM2;PCDHA1;ABLIM3;GNG7;SPOCK2;RHPN1;PCDH1;PCDHA8;PCDHA7;PCDHA6;SPTBN2;KCNIP1;WSCD1;NEBL;BDNF;IQSEC1;PCDH7;BTBD16;DAB2IP;KCNJ16;PLEKHA6;NMNAT2;BAIAP2;MAPK10;PTPRD;ANLN;NCEH1;FMNL2;TMCC2;CDR2L;CPEB3
OVARY (BULK TISSUE)	61/2316	0.980258	1	0	0	0.794525	0.0158422	ERRFI1;SH2D4A;EFCAB13;HSF2BP;ARHGAP39;SHB;PTPRF;AKAP12;SALL1;ZNF608;SIX5;THSD7A;TEAD1;ADAMTS9;BAHCC1;SEMA6A;ARHGEF17;CEP131;SHROOM2;COBL;HNF1B;HSPG2;INCENP;PARD3;ALDH1A2;KIF20A;GPRC5C;OBSL1;TRABD2B;GLIS3;LRP5;ITPR3;LTBP2;ASAP2;UACA;LYPD6;PPL;THSD4;SCEL;RAI1;ABL1;EP400;FLNB;B4GALNT3;PCDH1;OR7E47P;SPTBN2;KCNIP1;WSCD1;DAB2IP;HUWE1;DCDC2;B3GALT5;PTPRD;FAM160A1;FMNL2;ZNF618;MYO5B;TMCC2;FAT4;ADGRL2
SENSORY NEURON	60/2316	0.985785	1	0	0	0.7815	0.0111888	NRP1;MTCL1;HSF2BP;ARHGAP39;FNBP1L;PPP1R9A;BICD1;AKAP12;SALL1;RPS6KA2;ERC1;THSD7A;STK32A;ADAMTS9;RALGPS1;MAGI3;ARHGEF17;SHROOM2;PCDHA11;PCDHA10;VCAN;PLCB4;PARD3;TNIK;ST6GALNAC5;RAI14;CREB5;RBMS3;GLIS3;RASAL2;KALRN;PLCXD2;SCEL;ABLIM2;PCDHA1;ABLIM3;SPOCK2;MGAT5;NHS;ZPLD1;SRGAP3;PCDH1;PCDHA8;PCDHA7;PCDHA6;ZNF462;KCNIP1;BDNF;PCDH7;DAB2IP;PLEKHA6;NMNAT2;MAPK10;PTPRD;ZNF618;MYO5B;NF1;FAT4;CPEB3;ADGRL2
HEART (BULK TISSUE)	58/2316	0.993005	1	0	0	0.75545	0.00530322	SPON1;ADIRF;SHB;ARHGAP6;SIX5;RPS6KA2;ME3;THSD7A;TEAD1;ADAMTS9;TGM2;SCARA3;CLUH;LIMCH1;ARHGEF17;GAB1;EMP1;COBL;LMO7;HSPG2;TGFBR2;PLCB4;OBSCN;PARD3;HECW2;KCNQ1;ALDH1A2;DOK7;ROR1;OBSL1;TRABD2B;EPHA2;LRP5;KALRN;EGFR;THSD4;ARVCF;ABLIM2;ABLIM3;SH3TC2;B4GALNT3;PCDH1;OR7E47P;SVIL;NEBL;BDNF;PCDH7;DAB2IP;PLEKHA6;PPP2R3A;BICC1;ARHGAP24;ABTB2;FAM160A1;OGDH;FAT4;ADGRL2;LGR4
MACROPHAGE	58/2316	0.993005	1	0	0	0.75545	0.00530322	NRP1;DOCK4;ITGB2;TNFAIP2;ADIRF;MSANTD3;HSF2BP;PTPRJ;SLC7A11;SHB;LITAF;ARHGAP6;ALCAM;CEP170B;SIRPA;ZNF205;IKBKG;EPHB2;TNS3;MAP2K3;ABCC3;ZNF282;MYOF;CEP131;RHBDF2;PLAUR;EMP1;EREG;TBC1D2;KCNQ1;ALDH1A2;IL3RA;CHMP6;MGLL;MAD1L1;GLIS3;ARHGAP18;FAM129B;ARHGAP22;TSPAN4;RCE1;FNIP2;ZFHX2;NEK6;SUSD1;TMED7-TICAM2;MYO9B;BAIAP2;ABTB2;MYO1E;SPSB1;LRCH1;NCEH1;TNIP1;CD9;PLXNB2;AGRN;MAMLD1
ALPHA CELL	56/2316	0.996796	1	0	0	0.7294	0.00234065	ERRFI1;EHF;THRB;PODXL2;GDA;SHB;PPP1R9A;SIPA1L3;FAM102A;ZNF608;LURAP1L;STK32A;TEAD1;RALGPS1;SHROOM2;COBL;HNF1B;PLCB4;CDCP1;HECW2;LPAL2;ROR1;PKP3;GPRC5C;ST6GALNAC5;PDE9A;GLIS3;PPL;PLCXD2;ARVCF;ABLIM2;PCDHA1;ALOX12P2;COBLL1;ZPLD1;B4GALNT3;PCDH1;ZBED6;OR7E47P;PCDHA8;PCDHA7;PCDHA6;ZFHX2;KCNIP1;NEBL;DCDC2;PLEKHA6;NMNAT2;B3GALT5;BAIAP2;MAPK10;PTPRD;ZNF618;MYO5B;CPEB3;MAMLD1
ILEUM (BULK)	56/2316	0.996796	1	0	0	0.7294	0.00234065	LGALS3BP;PIGR;EHF;SPON1;SH2D4A;GDA;ADIRF;SHB;CAPN15;PTPRF;FAM102A;LURAP1L;SIX5;CEP170B;EPHB2;TINAG;RALGPS1;SLC16A5;TGM2;ABCC3;SCARA3;CLUH;ARHGEF16;COBL;SHROOM3;HNF1B;HSPG2;EDAR;CDCP1;KCNQ1;SCNN1A;PKP3;GPRC5C;PDE9A;EPHA2;MVP;GCNT1;LRP5;ITPR3;EVPL;EGFR;FAM129B;SPOCK2;B4GALNT3;PCDH1;OR7E47P;CA12;DAB2IP;PLEKHA6;B3GALT5;NR2F6;MYO1E;SPSB1;MYO5B;PLXNB2;LGR4
OOCYTE	55/2316	0.997891	1	0	0	0.716375	0.0015125	THRB;SH2D4A;HSF2BP;ARHGAP39;BRCA2;ARHGAP6;OSBPL10;KIF15;SIN3A;CEP170B;CHAC1;THSD7A;ADAMTS9;RNF111;ZHX3;ARHGEF16;GAB1;SHROOM2;EDAR;INCENP;PARD3;ALDH1A2;DOK7;KIF20A;PDE9A;CDCA2;UHRF1;ARHGAP18;ASAP2;LYPD6;KALRN;TRHDE;PARL;THSD4;SCEL;ABLIM2;COBLL1;HAS3;ZPLD1;PRELID2;STIL;WSCD1;BDNF;DAB2IP;DCDC2;BAIAP2;ABTB2;FAM160A1;ANLN;SPSB1;NCEH1;ZNF618;MYO5B;TMCC2;PTPN3
DORSAL STRIATUM	53/2316	0.999136	1	0	0	0.690325	0.000596814	SPON1;DOCK4;THRB;ZBTB20;PPP1R9A;SYNE1;TRPS1;ME3;MACROD2;THSD7A;STK32A;MAP3K5;KIRREL3;SCARA3;PLLP;SHROOM2;COBL;PCDHA11;OBSCN;HECW2;TNIK;ST6GALNAC5;LYPD6;KALRN;EGFR;ABLIM2;PCDHA1;SH3TC2;GNG7;SPOCK2;NHS;HIVEP2;PCDH1;PCDHA8;PCDHA7;PCDHA6;SPTBN2;CA12;KCNIP1;NEBL;PCDH7;DAB2IP;PLEKHA6;NMNAT2;B3GALT5;MAPK10;PTPRD;ANLN;NCEH1;FMNL2;TMCC2;FAT4;CPEB3
SUPERIOR FRONTAL GYRUS	50/2316	0.999802	1	0	0	0.65125	0.000129114	THRB;PODXL2;GDA;ADIRF;ARHGAP39;CEP170B;SIRPA;ZNF205;ME3;BAHCC1;KIRREL3;SCARA3;ARHGEF17;SHROOM2;COBL;PCDHA11;CLIP2;ST6GALNAC5;LYPD6;KALRN;KIAA0513;CTIF;ARVCF;ABLIM2;PCDHA1;ABLIM3;GNG7;SPOCK2;RHPN1;B4GALNT3;PCDH1;PCDHA8;RAB11FIP3;PCDHA7;PCDHA6;SPTBN2;ZFHX2;KCNIP1;WSCD1;NEBL;PCDH7;DAB2IP;PLEKHA6;NMNAT2;BAIAP2;MAPK10;PTPRD;TMCC2;CPEB3;MAMLD1
ERYTHROBLAST	49/2316	0.999882	1	0	0	0.638225	7.5285e-05	TOP2A;TONSL;SLC2A1;HMGB2;SHB;MKI67;ARHGAP6;CAPN15;KIF15;SIX5;LONP1;ZNF205;IKBKG;CHAC1;CIC;TGM2;MAP2K3;ABCC4;CLUH;ZNF282;CEP131;GAB1;TUBG1;CDC34;INCENP;ERF;TRIB3;KIF20A;CDCA2;LRP5;EVPL;ARVCF;RXRA;SH3TC2;U2AF2;CBS;SPTBN2;PRELID2;STIL;IQSEC1;SETD1A;TMED7-TICAM2;ANLN;CENPF;NCEH1;TMCC2;ANP32B;LGR4;SNTB1
HUMAN ZYGOTE	49/2316	0.999882	1	0	0	0.638225	7.5285e-05	THRB;SH2D4A;HSF2BP;ARHGAP39;BRCA2;ARHGAP6;OSBPL10;KIF15;DUSP10;SIN3A;CHAC1;THSD7A;ADAMTS9;SLC16A5;ZHX3;ARHGEF16;GAB1;SHROOM2;EDAR;PARD3;ALDH1A2;KIF20A;PDE9A;CDCA2;UHRF1;ARHGAP18;ASAP2;LYPD6;FHIT;KALRN;TRHDE;PARL;SCEL;ABLIM2;ERI1;HAS3;ZPLD1;CLSPN;PRELID2;WSCD1;NEBL;BDNF;DCDC2;BAIAP2;ABTB2;FAM160A1;ANLN;MYO5B;TMCC2
TESTIS (BULK TISSUE)	49/2316	0.999882	1	0	0	0.638225	7.5285e-05	PODXL2;MTCL1;ZBTB20;EFCAB13;HSF2BP;ARHGAP39;OSBPL10;SYNE1;AKAP12;CEP170B;ME3;THSD7A;CIC;CLUH;PLLP;CEP131;ARHGEF16;SHROOM2;TTC7A;ALDH1A2;DOK7;OBSL1;MACF1;ITPR3;EGFR;ARVCF;SH3TC2;SPOCK2;NHS;SH3BP4;B4GALNT3;OR7E47P;PCDHA8;RAB11FIP3;PCDHA7;PCDHA6;SPTBN2;ZFHX2;BTBD16;DAB2IP;MICAL2;MYO9B;NMNAT2;DCBLD2;FAM160A1;MYO5B;CPEB3;MAMLD1;LGR4
ALVEOLAR MACROPHAGE	48/2316	0.99993	1	0	0	0.6252	4.36466e-05	NRP1;DOCK4;ITGB2;TNFAIP2;ARHGAP18;IRS2;EFCAB13;PTPRJ;RASAL2;BRCA2;ARHGAP6;TRHDE;MTHFD1L;ERI1;MGAT5;PDGFC;PCED1B;SH3BP4;ABL2;SIRPA;ZBED6;TNS3;MAP3K5;TGM2;ABCC3;SVIL;NEK6;MACC1;MYOF;SUSD1;PLAUR;TTC7A;ARHGAP24;EREG;TGFBR2;TBC1D2;NCEH1;CDCP1;FMNL2;KCNQ1;DLC1;ALDH1A2;IL3RA;RARA;ERF;CD9;CPEB3;SNTB1
BLOOD PBMC	47/2316	0.999958	1	0	0	0.612175	2.54604e-05	TRABD;ITPR3;PTPRJ;JADE2;CCDC102A;PLCXD2;CAPN15;PCNX3;FAM102A;EME2;SPOCK2;GRPEL2;PCED1B;RHPN1;FLNA;IKBKG;HIVEP2;RCE1;ZBED6;SLC16A5;FAAP100;CMTM7;PRKCH;SMAD3;ARRDC1;CEP131;TMED7-TICAM2;TTC7A;MPP7;TGFBR2;EDAR;FCHSD1;INPP4A;SPSB1;SNRK;TBC1D2;OBSCN;CDC34;BTD;TNIP1;KCNQ1;RARA;TRIB3;CHMP6;MAD1L1;SNTB1;PLEC
VALVE	45/2316	0.999984	1	0	0	0.586125	9.60331e-06	SPON1;TNC;GLIS3;LRP5;ADIRF;RRBP1;LTBP2;ASAP2;SHB;ARHGAP6;CCDC102A;FAM129B;CTIF;ARVCF;RGS3;LURAP1L;ABLIM3;SIX5;CEP170B;TSPAN4;ZNF205;B4GALNT3;STK32A;PCDH1;BAHCC1;TGM2;SCARA3;ARHGEF17;DAB2IP;EMP1;PLEKHA6;HSPG2;ARHGAP24;ABTB2;EXT1;SPSB1;KCNQ1;ALDH1A2;ERF;CD9;FAT4;CDR2L;GPRC5C;TRABD2B;EPHA2
PLASMACYTOID DENDRITIC CELL	44/2316	0.999989	1	0	0	0.5731	6.56034e-06	BCAR3;PTPRJ;RRBP1;SLC7A11;JADE2;CCDC102A;PLCXD2;CAPN15;PCNX3;PCED1B;SH3BP4;SIRPA;FLNB;IKBKG;CHAC1;HIVEP2;RCE1;CIC;BAHCC1;NEK8;CMTM7;MYOF;CEP131;SUSD1;SETD1A;RHBDF2;TMED7-TICAM2;COBL;TTC7A;BAIAP2;ARHGAP24;CD2AP;ABTB2;EXT1;FAM160A1;MYO1E;ZNF618;TNIP1;INCENP;KCNQ1;IL3RA;ERF;MGLL;EPHA2
SPLEEN (BULK TISSUE)	44/2316	0.999989	1	0	0	0.5731	6.56034e-06	SPON1;ITGB2;ADIRF;ITPR3;PTPRJ;JADE2;ARHGAP6;CCDC102A;KALRN;TRHDE;CAPN15;ARVCF;ABLIM2;LURAP1L;SIX5;SPOCK2;PCED1B;TSPAN4;OR7E47P;ADAMTS9;MAP3K5;FAAP100;PRKCH;WSCD1;LIMCH1;IQSEC1;PCDH7;CEP131;DAB2IP;MYO9B;HSPG2;ARHGAP24;TGFBR2;OBSCN;HECW2;KCNQ1;SPATA13;DOK7;PLXNB2;TMCC2;FAT4;ADGRL2;TRABD2B;PLEC
THYMUS (BULK TISSUE)	43/2316	0.999991	1	0	0	0.560075	4.93792e-06	TOP2A;CDCA2;IRS1;UHRF1;ITGB2;LRP5;ITPR3;MKI67;EGFR;KIF15;SCEL;FAM102A;SIX5;SPOCK2;RHPN1;ZNF205;FLNB;HIVEP2;ZBED6;OR7E47P;BAHCC1;SCARA3;PRKCH;CEP131;DAB2IP;LMO7;TTC7A;EDAR;ANLN;CENPF;SPSB1;SNRK;LRCH1;OBSCN;INCENP;PARD3;CROCC;MYO5B;ALDH1A2;PKP3;KIF20A;AMOTL1;TRABD2B
BLYMPHOCYTE	42/2316	0.999993	1	0	0	0.54705	4.07536e-06	CDCA2;ITPR3;EFCAB13;JADE2;CCDC102A;SIPA1L3;PLCXD2;OSBPL10;KIF15;DCAF1;PCNX3;FAM102A;ZNF608;U2AF2;MGAT5;COBLL1;PCED1B;DHX38;HIVEP2;CIC;ZBED6;SLC38A1;SMAD3;PPTC7;IQSEC1;NEK6;CEP131;SETD1A;RHBDF2;TMED7-TICAM2;TTC7A;ARHGAP24;TGFBR2;FCHSD1;RAD51B;MYO1E;LRCH1;INCENP;DMXL1;DOK7;TRIB3;MAD1L1
DENTATE GRANULE CELL	38/2316	0.999994	1	0	0	0.49495	3.05647e-06	SPON1;DOCK4;THRB;GDA;ZBTB20;PPP1R9A;LYPD6;ARHGAP6;KALRN;ABLIM2;LURAP1L;PCDHA1;ABLIM3;THSD7A;STK32A;PCDHA8;PCDHA6;KCNIP1;NEBL;BDNF;LIMCH1;PCDH7;SHROOM2;NMNAT2;PCDHA11;ARHGAP24;MAPK10;PTPRD;NCEH1;NFIB;MYO5B;ALDH1A2;FAT4;CLDN16;CPEB3;CALM2;MAMLD1;ST6GALNAC5
CD19+ B CELLS	34/2316	0.999994	1	0	0	0.44285	2.70837e-06	ITGB2;FAM208B;ITPR3;EFCAB13;JADE2;CCDC102A;SIPA1L3;PLCXD2;OSBPL10;GNA13;ZNF608;SPOCK2;MGAT5;COBLL1;PCED1B;HIVEP2;ZBED6;PLLP;NEK6;VPS13D;CEP131;TTC7A;SSH2;ARHGAP24;TGFBR2;FCHSD1;RAD51B;MYO1E;LRCH1;INCENP;DMXL1;DOK7;CDK13;MAD1L1
CD34+ CELL	34/2316	0.999994	1	0	0	0.44285	2.70837e-06	TRABD;UHRF1;ITGB2;HMGB2;TFPI;PARL;ACTB;RPS14;CAPZB;NRIP1;RHPN1;RPL35;ANKRD10;ME3;CMTM7;ANXA1;FNBP1;ARRDC1;CCDC115;H2AFV;DEK;EEF2;SDHA;EREG;EEF1A1;MORF4L1;NCL;POLE3;P4HB;ANP32B;SLIRP;GAPDH;MGLL;SNTB1
NATURAL KILLER CELLS	31/2316	0.999994	1	0	0	0.403775	2.46871e-06	TRABD;ITGB2;PTPRJ;JADE2;LITAF;CCDC102A;PLCXD2;PCNX3;LIPC;DUSP10;RGS3;SPOCK2;PCED1B;TSPAN4;IKBKG;RCE1;FAAP100;MAP2K3;PRKCH;ZNF282;ARRDC1;CCDC115;RHBDF2;FCHSD1;GALE;DOK7;RARA;TRIB3;RBCK1;CHMP6;MAD1L1
NEUTROPHIL	31/2316	0.999994	1	0	0	0.403775	2.46871e-06	ITGB2;TNFAIP2;PTPRJ;LITAF;SEC14L1;RXRA;UBN1;NHS;SIRPA;IKBKG;CIC;SLC16A5;MAP3K5;NDEL1;MAP2K3;IQSEC1;TMED7-TICAM2;PLAUR;ARHGAP26;SSH2;MPP7;ABTB2;FCHSD1;TBC1D2;KCNQ1;ALDH1A2;IL3RA;RARA;ERF;MEGF9;CREB5
BONE MARROW (BULK TISSUE)	28/2316	0.999994	1	0	0	0.3647	2.22977e-06	PIGR;HMGB2;ZBTB20;UQCR11;TFPI;METTL21A;MLLT3;FHIT;ACTB;RPS14;NRIP1;RPL35;ANKRD10;PDE6A;RREB1;PHACTR4;CMTM7;ANXA1;FNBP1;H2AFV;SDHA;NAALADL2;EREG;EEF1A1;NCL;ANP32B;SLIRP;LIMS1
BLOOD DENDRITIC CELLS	27/2316	0.999994	1	0	0	0.351675	2.15014e-06	CHD9;ITGB2;TNFAIP2;UQCR11;ASAP1;ACTB;SYNE1;ACTG1;RPS14;CAPZB;SUMO1;RPL35;NDUFV2;SKP1;CMTM7;SLC38A1;ANXA1;MORC4;PRPF40A;DEK;KTN1;EEF1A1;SNRPF;SLIRP;UBA52;CALM2;MMADHC
DENDRITIC CELL	26/2316	0.999994	1	0	0	0.33865	2.0705e-06	EHF;ITGB2;TNFAIP2;UQCR11;ASAP1;LITAF;ACTB;ACTG1;RPS14;CAPZB;SUMO1;RPL35;NDUFV2;SKP1;CMTM7;ANXA1;MORC4;FNBP1;PRPF40A;DEK;KTN1;EEF1A1;SNRPF;UBA52;CALM2;MMADHC
CORD BLOOD	25/2316	0.999994	1	0	0	0.325625	1.99087e-06	TRABD;ITGB2;HMGB2;UQCR11;LITAF;ACTB;ACTG1;GNA13;RPS14;DHX15;RPL35;CMTM7;ANXA1;RFC1;FNBP1;PLAUR;DEK;KTN1;EEF1A1;IL3RA;POLE3;SNRPF;ANP32B;SLIRP;UBA52
GRANULOCYTE	24/2316	0.999994	1	0	0	0.3126	1.91123e-06	PLLP;IQSEC1;ITGB2;TNFAIP2;PTPRJ;ARHGAP26;SSH2;PPL;MPP7;ARHGAP24;TGFBR2;SNRK;TBC1D2;SEC14L1;KCNQ1;ALDH1A2;RARA;NHS;SIRPA;ZBED6;SLC16A5;MAP3K5;MEGF9;CREB5
PERIPHERAL BLOOD	23/2316	0.999994	1	0	0	0.299575	1.8316e-06	IQSEC1;ITGB2;SUSD1;TMED7-TICAM2;TNFAIP2;PTPRJ;TTC7A;JADE2;LITAF;TGFBR2;EDAR;TBC1D2;RXRA;SPOCK2;KCNQ1;PCED1B;RARA;SIRPA;IKBKG;SLC16A5;MAP3K5;MEGF9;CREB5
BLASTOCYST	22/2316	0.999994	1	0	0	0.28655	1.75196e-06	CA12;CDCA2;SEMA6A;SH2D4A;MYOF;ARHGEF16;COBL;HSF2BP;NAALADL2;NR2F6;KIF15;ANLN;PARD3;MYO5B;SH3BP4;ZNF205;PKP3;KIF20A;B4GALNT3;PCDH1;LGR4;RAI14
MORULA	20/2316	0.999994	1	0	0	0.2605	1.59269e-06	CDCA2;SH2D4A;C2CD3;MTCL1;TMED7-TICAM2;DCDC2;HSF2BP;SHB;METTL21A;NAALADL2;KIF15;ABTB2;FAM160A1;CENPF;PARD3;GRPEL2;HAS3;KIF20A;CHAC1;CLSPN
PLASMA CELL	20/2316	0.999994	1	0	0	0.2605	1.59269e-06	MBNL2;B4GALT1;SH2D4A;GAB1;ARHGAP18;ITPR3;EFCAB13;BRCA2;OSBPL10;RAD51B;BTD;SEC14L1;GNG7;MYO5B;COBLL1;PCED1B;CD9;CHAC1;SEC62;SPTBN2
REGULATORY T CELLS	20/2316	0.999994	1	0	0	0.2605	1.59269e-06	CMTM7;PRKCH;CCDC115;GCNT1;ITGB2;ADIRF;JADE2;RAD51B;RPS14;LIPC;FAM102A;DUSP10;BTD;ERI1;SPOCK2;GRPEL2;PCED1B;CHMP6;MAD1L1;PDE9A
SPERM	20/2316	0.999994	1	0	0	0.2605	1.59269e-06	EHF;ZFHX2;BTBD16;EFCAB13;HSF2BP;HNF1B;TTC7A;NMNAT2;LYPD6;GIGYF2;DCAF1;MAPK10;FAM160A1;ZNF608;RARA;CPEB3;B4GALNT3;OR7E47P;PCDHA8;SPTBN2
TLYMPHOCYTE	20/2316	0.999994	1	0	0	0.2605	1.59269e-06	NEK8;SLC38A1;PRKCH;ANXA1;B4GALT1;HSPA4;MACC1;ITGB2;UQCR11;MLLT3;LITAF;ACTB;SYNE1;EDAR;RPS14;SPOCK2;PCED1B;RPL35;UBA52;AHDC1
CD4+ T CELL	19/2316	0.999994	1	0	0	0.247475	1.51306e-06	PRKCH;SMAD3;ITGB2;HUS1;ARHGAP18;JADE2;PLCXD2;MPP7;EDAR;RAD51B;RPS14;FAM102A;BTD;SPOCK2;LPAL2;SPATA13;PCED1B;ANP32E;MAP3K5
COLONIC MUCOSA	15/2316	0.999994	0.999994	0	0	0.195375	1.19452e-06	CA12;PIGR;EHF;GDA;EFCAB5;HNF1B;B3GALT5;SCEL;GALE;MYO5B;SCNN1A;ZPLD1;CLDN16;TNS4;TINAG

## Sheet: Disease Perturbations from GEO down
Term	Overlap	P-value	Adjusted P-value	Old P-value	Old Adjusted P-value	Odds Ratio	Combined Score	Genes
autism spectrum disorder DOID-0060041 human GSE62632 sample 1037	37/472	1.29374e-06	0.00108545	0	0	2.3647	32.0605	RBM25;USP16;DDX46;GDA;TNC;TFPI;CCAR1;KIF15;CDH6;KIAA1524;NIPBL;ZNHIT6;NRIP1;THSD7A;SEC62;ZC3H13;PCDHA8;PCDHA7;PCDHA6;NKTR;STIL;ANXA1;PRPF40A;THOC2;PPP2R3A;OXR1;PCDHA11;PCDHA10;KTN1;STAG1;VCAN;PLCB4;SLTM;ANP32E;PHIP;MALAT1;NFE2L2
Macular degeneration C0024437 human GSE1719 sample 46	29/337	3.00275e-06	0.00125966	0	0	2.59588	33.0092	FTO;APP;MACF1;RABGAP1;MTCL1;LTBP2;PLOD1;KLC1;PPL;PRSS23;FLNA;MAP4;SPTAN1;CRIM1;MICAL2;SARS;ACTN4;EEF2;HSPG2;VCAN;PLXNB2;ROR1;ANP32B;P4HB;AGRN;MAMLD1;DBN1;VCL;PLEC
hepatitis C DOID-1883 human GSE20948 sample 599	27/305	3.87088e-06	0.00108256	0	0	2.67043	33.2789	NXN;MGST3;PPL;PRSS23;UACA;ACTB;ACTG1;CAPZB;COX2;FLNA;PLS3;COX1;FLNB;TNS3;OSBPL9;MICAL2;ACTN4;C12ORF75;HSPG2;KTN1;ANLN;MORF4L1;SMS;UBA52;DBN1;VCL;RAI14
Anxiety Disorder C0003469 rat GSE932 sample 111	23/242	6.25094e-06	0.00131114	0	0	2.86701	34.3547	ATP6V1A;HSPA9;APP;GDA;MGST3;PTPRJ;UQCR11;ACTB;EPN1;ACTG1;MYO5B;GNG7;SPOCK2;CANX;COX3;COX2;COX1;NDUFV2;UBA52;CALM2;SPTAN1;GAPDH;ND5
Ulcerative Colitis C0009324 human GSE6731 sample 249	29/354	7.83555e-06	0.0013148	0	0	2.47122	29.0537	KDM5A;PIGR;SPON1;CHD9;NEDD4L;MLLT3;EGFR;GNA13;NIPBL;LIPC;GNG7;NRIP1;FAM3C;ZC3H13;BPTF;CA12;MBNL2;SEMA6A;SMURF2;MYOF;GAB1;EMP1;COBL;THOC2;NEAT1;STAG1;GNAQ;CPEB3;LIMS1
Cardiac Hypertrophy C1383860 rat GSE1055 sample 354	34/467	1.67609e-05	0.00234373	0	0	2.19623	24.1508	ITGB1;LGALS3BP;APP;MACF1;MGST3;PRSS23;ACTB;ACTG1;RAI1;ALCAM;CAPZB;U2AF2;FAM120A;COX2;FLNA;NDUFV2;TNS3;SPTAN1;SKP1;ANXA1;NEBL;ACTN4;EEF2;SDHA;HADHA;MORF4L1;CANX;PLXNB2;P4HB;EZR;GAPDH;CALM2;VCL;METAP2
Diabetic Nephropathy C0011881 human GSE1009 sample 223	31/414	2.2938e-05	0.00274929	0	0	2.2588	24.1301	ITGB1;LGALS3BP;ACTB;ACTG1;SLK;CAPZB;MGAT5;SPOCK2;FLNA;THSD7A;SPTAN1;SKP1;TGM2;ANXA1;FNBP1;ITGA3;CTDSPL;CRIM1;ACTN4;EEF2;CD2AP;KTN1;PTPRD;MYO1E;CANX;PLXNB2;P4HB;AGRN;EZR;CALM2;VCL
adrenoleukodystrophy DOID-10588 human GSE34309 sample 864	26/338	6.62313e-05	0.00694601	0	0	2.32045	22.3282	LGALS3BP;BCAR3;GCNT1;ADIRF;ASAP1;SLC7A11;ASAP2;TFPI;TRHDE;ARHGAP22;DUSP10;ABLIM3;ME3;TEAD1;MAP3K5;SVIL;SMURF2;MYOF;CRIM1;EMP1;HMGA2;AIM1;CDCP1;PLCB4;CD9;MGLL
Nephroblastoma C0027708 human GSE2712 sample 418	30/419	7.05179e-05	0.00657384	0	0	2.15985	20.6474	ITGB1;MGST3;LITAF;ACTB;ACTG1;AKAP12;ALCAM;NRIP1;PLS3;THSD7A;SEC62;TNS3;MYH10;NEBL;LIMCH1;KCNJ16;HNF1B;ACTN4;KTN1;PTPRD;FAM111A;VCAN;AIM1;NCL;ALDH1A2;CANX;FAT4;UBA52;NFE2L2;RAI14
hepatitis C DOID-1883 human GSE20948 sample 598	24/302	7.55047e-05	0.00633484	0	0	2.39729	22.7534	NXN;MGST3;MICAL2;ACTN4;PPL;PRSS23;UACA;ACTB;NR2F6;ACTG1;ANLN;LASP1;CAPZB;SMS;RPL35;FLNA;PLS3;FLNB;NDUFV2;UBA52;DBN1;VCL;SKP1;RAI14
ulcerative colitis DOID-8577 human GSE6731 sample 760	24/314	0.000137676	0.0105009	0	0	2.30567	20.4989	CA12;SPON1;MBNL2;SEMA6A;CHD9;GAB1;NEDD4L;EMP1;COBL;VLDLR;NEAT1;MLLT3;EGFR;CD2AP;GNA13;NIPBL;LIPC;SLK;GNAQ;GNG7;NRIP1;CPEB3;ZC3H13;LIMS1
Hypertension C0020538 rat GSE2739 sample 209	29/418	0.000159605	0.011159	0	0	2.09285	18.2974	ITGB1;APP;GDA;HDLBP;UQCR11;LITAF;TRIOBP;ACTB;ACTG1;RPS14;RPL35;SIRPA;TNS3;RAB11FIP3;SPTAN1;SPTBN2;PLLP;IQSEC1;HUWE1;EEF2;SDHA;INPP4A;RARA;P4HB;AGRN;EZR;UBA52;GAPDH;CALM2
myotonic dystrophy type 1 DOID-11722 human GSE7177 sample 1054	25/337	0.000160723	0.0103728	0	0	2.23783	19.5493	ITGB1;RNF11;FNBP1L;TRHDE;ACTB;AKAP12;PDGFC;RPL35;COX2;COX1;AP3S1;PPP1R12A;SMURF2;BDNF;CBX1;CRIM1;MICAL2;DEK;EEF2;ANLN;MORF4L1;DLC1;ANP32B;VCL;RAI14
Dental cavity, complex C0399396 human GSE1629 sample 175	28/401	0.000185199	0.0110987	0	0	2.10635	18.1021	APP;SPON1;MGST3;ADIRF;NUCKS1;ACTB;ACTG1;AKAP12;PDGFC;RPL35;FLNA;PLS3;MAP4;MYH10;SCARA3;ANXA1;LIMCH1;ARHGEF17;EEF2;PTPRD;EEF1A1;MORF4L1;VCAN;NCL;CD9;PHIP;SLIRP;CALM2
prostate cancer DOID-10283 human GSE3868 sample 639	26/362	0.000200303	0.0112036	0	0	2.16661	18.4502	LGALS3BP;APP;NXN;VLDLR;LITAF;ACTG1;RPL35;PLS3;AP3S1;FAM3C;TNS3;MYH10;SKP1;SLC38A1;ANXA1;HUWE1;ACTN4;EEF2;EEF1A1;MORF4L1;CANX;ANP32B;CALM2;VCL;RAI14;NFE2L2
ulcerative colitis DOID-8577 human GSE6731 sample 759	27/384	0.000214593	0.0112527	0	0	2.12104	17.9159	KDM5A;PIGR;SPON1;IRS1;ASAP2;FNBP1L;MLLT3;NRIP1;FAM63B;FAM3C;ZC3H13;BPTF;MBNL2;SEMA6A;SMURF2;MYOF;GAB1;CRIM1;EMP1;NUP153;THOC2;NEAT1;EREG;STAG1;GNAQ;CPEB3;LIMS1
prostate cancer DOID-10283 human GSE3325 sample 990	23/304	0.000218463	0.0107818	0	0	2.28229	19.2372	LGALS3BP;EHF;PPP1R12A;LIMCH1;MGST3;ADIRF;ZBTB20;NUCKS1;IRS2;PRSS23;ACTB;MORF4L1;DMXL1;SMS;COX1;FLNB;MALAT1;ANP32B;AMOTL1;CALM2;GAPDH;VCL;SKP1
Lung Injury C0273115 human GSE1541 sample 67	25/346	0.000240903	0.0112287	0	0	2.17962	18.1587	TOP2A;MACF1;NUCKS1;SLC7A11;LITAF;ACTG1;ALCAM;RPL35;AP3S1;SKP1;CA12;HSPA9;MYOF;CBX1;H2AFV;DEK;TGFBR2;NCOR2;MORF4L1;VCAN;ASPH;CANX;SMS;RBCK1;VCL
Endometriosis C0014175 human GSE7305 sample 149	21/270	0.000279195	0.0123287	0	0	2.34624	19.2007	ERRFI1;IRS1;NXN;ZBTB20;MIR21;ACTN4;NEAT1;EEF2;ACTB;ACTG1;EEF1A1;VCAN;ALDH1A2;ABL1;FLNA;COX1;UBA52;GAPDH;VCL;TGM2;ND4
breast cancer DOID-1612 human GSE14943 sample 504	17/197	0.000316005	0.0132564	0	0	2.60315	20.9807	ATP6V1A;LGALS3BP;SCARA3;SLC38A1;ITGB2;TONSL;SHROOM2;NMNAT2;EEF2;TRIOBP;GNA13;TBC1D2;ZMIZ1;EZR;TNS3;GPRC5C;PLEC
hepatitis C DOID-1883 human GSE20948 sample 597	22/299	0.000435712	0.0174077	0	0	2.21957	17.1762	ERRFI1;NXN;MICAL2;MSANTD3;MIR21;ACTN4;UACA;ACTB;NR2F6;ACTG1;GNA13;PDGFC;RPL35;PLS3;COX1;FLNB;SNRPF;TNS3;UBA52;VCL;LINC01138;RAI14
Granulomatous Disease, Chronic C0018203 human GSE935 sample 371	22/301	0.000476976	0.0181901	0	0	2.20482	16.8625	SMARCC1;DDX27;UBE2B;NEBL;ARHGEF17;MYOF;MICAL2;FOXK2;VLDLR;CAPN15;EREG;VCAN;SNRK;DUSP10;GNAQ;UBN1;DLEU1;UBXN7;CD9;RAB11FIP3;PDE9A;CREB5
Asthma, allergic C0155877 mouse GSE2276 sample 348	20/262	0.000491216	0.0179187	0	0	2.30274	17.5437	ITGB1;APP;ERRFI1;MACF1;SVIL;MGEA5;LIMCH1;RDX;EMP1;SHROOM3;LMO7;PPL;INPP4A;EEF1A1;SNRK;SPOCK2;SPTAN1;SPTBN1;VCL;LIMS1
multiple sclerosis DOID-2377 human GSE16461 sample 584	29/452	0.000579298	0.0202513	0	0	1.93542	14.4261	ITGB2;IRS2;LITAF;ACTB;MLLT6;ACTG1;GOLGA4;LASP1;DUSP10;ZMAT2;SPOCK2;PCED1B;FLNA;COX1;PRKCH;CCDC115;TGFBR2;EEF1A1;MORF4L1;AIM1;SLTM;NCL;ANP32B;SLIRP;DCP1A;UBA52;CALM2;MMADHC;ND4
myelodysplastic syndrome DOID-0050908 human GSE19429 sample 812	22/309	0.000678042	0.0227551	0	0	2.14773	15.6705	CMTM7;ANXA1;DDX46;UHRF1;PLAUR;NEAT1;ACTB;AKAP12;EEF1A1;GNA13;RPS14;ZMAT2;ZMIZ1;DMXL1;NRIP1;ANKRD10;CD9;MALAT1;AP3S1;OGT;GAPDH;SKP1
Williams-Beuren syndrome DOID-1928 human GSE16715 sample 903	22/310	0.000707728	0.0228378	0	0	2.14081	15.5282	OSBPL9;HSPA9;MGEA5;SPON1;SLC38A1;THRB;DDX46;TNC;MIR21;SLC7A11;FTX;GRAMD3;NEAT1;SYNE1;LURAP1L;SLTM;TRPS1;TRIB3;ROR1;CHAC1;FAT4;OGT
tibial muscular dystrophy DOID-9884 human GSE42806 sample 539	23/335	0.000849818	0.0264073	0	0	2.07109	14.6436	SPEN;SETD5;SETD2;MBNL2;B4GALT1;PPP1R12A;PRPF40A;GRAMD3;NEAT1;HSPG2;RPS14;NIPBL;ITCH;THRAP3;UBN2;NRIP1;ASXL2;OGDH;RPL35;UBXN7;MALAT1;EZR;NKTR
prostate cancer DOID-10283 human GSE39452 sample 485	24/361	0.00103427	0.0309912	0	0	2.00549	13.7859	TOP2A;FTO;STIL;CDCA2;UHRF1;CBX1;HMGB2;MSANTD3;SLC7A11;DEK;MKI67;BRCA2;TUBG1;RANGAP1;SKA2;KIF15;ANLN;KIAA1524;CENPF;ZMAT2;DLEU1;ANP32E;KIF20A;WHSC1
esophagus squamous cell carcinoma DOID-3748 human GSE63941 sample 658	26/408	0.00120376	0.0348259	0	0	1.92234	12.9225	ITGB1;RNF11;CTR9;LTBP2;SLC7A11;TFPI;PRSS23;ACTG1;LASP1;AP3S1;TNS3;MYH10;SKP1;SMURF2;BDNF;CRIM1;C12ORF75;SUMF1;TGFBR2;EXT1;VCAN;ASPH;MALAT1;MMADHC;VCL;RAI14
Squamous cell carcinoma of mouth C0585362 human GSE3524 sample 295	17/224	0.00134578	0.037637	0	0	2.28938	15.1346	ANXA1;SMAD3;MAST4;NEBL;EMP1;COBL;PPL;EVPL;EREG;SCEL;SNRK;CDCP1;SCNN1A;EZR;MGLL;EPHA2;NDEL1
Cancer of prostate C0376358 human GSE3868 sample 135	24/369	0.00139181	0.0376687	0	0	1.96201	12.9044	LGALS3BP;APP;SLC38A1;NXN;HUWE1;ACTN4;VLDLR;EEF2;LITAF;ACTG1;AKAP12;EEF1A1;MORF4L1;CANX;RPL35;PLS3;ANP32B;AP3S1;TNS3;CALM2;MYH10;VCL;SKP1;NFE2L2
Crohn's disease DOID-8778 human GSE6731 sample 757	24/370	0.00144322	0.0378394	0	0	1.95671	12.7986	KDM5A;MBNL2;PPP1R12A;SMURF2;CHD9;MYOF;EMP1;ZBTB20;THOC2;TUBG1;NEAT1;BICC1;CD2AP;AKAP12;NIPBL;VCAN;SLK;DLC1;GNAQ;NRIP1;PCDHA9;ZC3H13;LIMS1;BPTF
B-cell chronic lymphocytic leukaemia/small lymphocytic lymphoma C0023458 human GSE8835 sample 194	24/372	0.00155094	0.0394315	0	0	1.94619	12.5897	KDM5A;SETD5;SLC38A1;RBM25;ANXA1;USP16;IQSEC1;PRPF40A;NUP153;ACTB;TGFBR2;RPS14;AIM1;SNRK;NCL;SPOCK2;DHX15;PHIP;TNIK;EZR;CALM2;OGT;LUC7L2;NKTR
Primary open angle glaucoma C0339573 human GSE4316 sample 284	17/227	0.00155334	0.0383311	0	0	2.25912	14.6105	LGALS3BP;ANXA1;SMURF2;NXN;LTBP2;C12ORF75;EEF2;ACTB;DCBLD2;ACTG1;LASP1;COX2;PLS3;AP3S1;P4HB;TNS3;GAPDH
Primary pulmonary hypoplasia C0456891 mouse GSE1363 sample 20	22/330	0.00158798	0.0380661	0	0	2.01106	12.9619	ITGB1;ERRFI1;NRP1;SVIL;RNF11;ANXA1;B4GALT1;EMP1;LMO7;DEK;ACTB;EEF1A1;MORF4L1;SNRK;SUMO1;NCL;PLS3;CD9;TOP1;AGRN;CALM2;SPTBN1
Fracture of femur C0015802 rat GSE1371 sample 278	18/249	0.00170312	0.0396923	0	0	2.18067	13.9024	NRP1;EIF5B;ARRDC1;GDA;MGST3;UQCR11;ACTB;TRIOBP;RPS14;HADHA;ASPH;COX3;COX1;CYTB;NDUFV2;GAPDH;ND5;ND4
COPD - Chronic obstructive pulmonary disease C0024117 human GSE3320 sample 255	27/442	0.00180315	0.0408877	0	0	1.84271	11.6427	LGALS3BP;APP;RNF11;USP16;NXN;MVP;HMGB2;IRS2;GRAMD3;LITAF;PDGFC;DHX15;FLNB;FAM3C;OR7E47P;KCNJ16;MIR21;DEK;EEF2;MORF4L1;NCL;CD9;PHIP;CALM2;MGLL;NFE2L2;EPHA2
myotonic dystrophy type 1 DOID-11722 human GSE7178 sample 1052	18/252	0.00194328	0.0429056	0	0	2.15471	13.4527	ANKRD17;SUPT16H;RBM25;PRPF40A;NUCKS1;DEK;FNBP1L;EEF2;CCAR1;NASP;COX2;COX1;MALAT1;TOP1;UBA52;MYH10;ND4;BPTF
colitis DOID-0060180 human GSE6731 sample 761	23/359	0.00210288	0.0452388	0	0	1.93264	11.9136	CA12;SEMA6A;SMURF2;CHD9;NEDD4L;ADIRF;EMP1;COBL;NEAT1;CD2AP;NIPBL;SLK;ATXN1;GNG7;NRIP1;DLEU1;EZR;CPEB3;ZC3H13;MGLL;LIMS1;BPTF;METAP2
ovarian cancer DOID-2394 human GSE14407 sample 611	23/364	0.0025042	0.0525256	0	0	1.90609	11.4171	RNF11;ANXA1;HUWE1;CRIM1;ARHGAP18;EEF2;KTN1;EEF1A1;MORF4L1;ALCAM;SLK;ALDH1A2;PDGFC;COX3;COX2;PLS3;COX1;MALAT1;AP3S1;EZR;MMADHC;SKP1;ND4
myotonic dystrophy type 1 DOID-11722 human GSE7178 sample 1051	19/279	0.00253674	0.0519103	0	0	2.05431	12.2784	SLC38A1;RNF11;ANXA1;CRIM1;HMGB2;NUCKS1;DEK;FNBP1L;EEF2;PDGFC;NRIP1;DHX15;COX2;COX1;MALAT1;UBA52;CALM2;RAI14;ND4
Diamond-Blackfan anaemia DOID-1339 human GSE14335 sample 472	16/218	0.00258059	0.0515504	0	0	2.21401	13.1949	SLC38A1;FNBP1;NXN;TNC;SHROOM2;ADIRF;SLC7A11;PPL;PRSS23;TRHDE;AIM1;CBS;RPS6KA2;DLEU1;TRIB3;ST6GALNAC5
silicosis DOID-10325 rat GSE29110 sample 983	18/260	0.00272686	0.0532054	0	0	2.08841	12.3312	ITGB1;APP;MACF1;SPON1;NEBL;MAGI3;PPL;PRSS23;EEF1A1;RPL35;COX2;CD9;COX1;CYTB;TNS3;SPTAN1;MYH10;SPTBN1
myotonic dystrophy type 1 DOID-11722 human GSE7177 sample 1053	19/284	0.00308734	0.0588699	0	0	2.01814	11.6658	LGALS3BP;MYOF;PLOD1;EEF2;ACTB;LASP1;VCAN;DLC1;PDGFC;RPL35;COX2;COX1;TNS3;UBA52;MYH10;GAPDH;VCL;RAI14;ND4
endometriosis DOID-289 human GSE23339 sample 883	19/285	0.00320864	0.0598233	0	0	2.01106	11.5473	PIGR;MYOF;TNC;EMP1;ITPR3;PLOD1;PRSS23;ACTB;FAM129B;EEF1A1;ALDH1A2;SCNN1A;SLIRP;EZR;SAE1;GAPDH;VCL;TGM2;RAI14
Idiopathic fibrosing alveolitis C0085786 human GSE10921 sample 272	23/374	0.00350365	0.0639036	0	0	1.85512	10.4888	NRP1;ANXA1;ITGA3;PHF12;ARHGEF16;TNC;HMGB2;SLC39A10;NEAT1;THSD4;KTN1;FUT8;ALCAM;MTHFD1L;CAPZB;SUMO1;ABLIM3;NFIB;CANX;FAM120A;SMS;AP3S1;SEC62
prostate cancer DOID-10283 human GSE55945 sample 835	22/359	0.00441819	0.0788694	0	0	1.84861	10.0232	ERRFI1;PIGR;ANXA1;B4GALT1;PPP1R12A;NXN;MGST3;ADIRF;SLC39A10;ZBTB20;MIR21;IRS2;DEK;LITAF;ACTB;ACTG1;NFIB;FLNA;CD9;MALAT1;GAPDH;DUXAP10
myelodysplastic syndrome DOID-0050908 human GSE19429 sample 748	18/273	0.00455349	0.0795912	0	0	1.98896	10.7242	TOP2A;CMTM7;SLC38A1;UHRF1;HMGB2;PLAUR;DEK;ACTG1;AKAP12;EEF1A1;RPS14;NRIP1;COX3;DHX15;CD9;MALAT1;CALM2;GAPDH
Rift Valley fever DOID-1328 mouse GSE18064 sample 876	22/360	0.00456397	0.0781464	0	0	1.84347	9.93551	OSER1;ERRFI1;SLC38A1;ANXA1;IRS1;SLC2A1;PLAUR;SARS;HMGA2;NEAT1;PARL;EREG;FAM129B;AKAP12;PPP4R2;MTHFD1L;PDGFC;LONP1;ANP32B;TNS3;GAPDH;PLEC
Neurological pain disorder C0423704 rat GSE2636 sample 129	21/338	0.00457369	0.0767465	0	0	1.87421	10.0972	MBNL2;IQSEC1;GDA;MGST3;CBX1;UQCR11;KLC1;OXR1;TRIOBP;INPP4A;IRGQ;SPOCK2;CANX;COX2;CYTB;NDUFV2;CALM2;SPTAN1;ND5;ND4;METAP2
Crohn's disease DOID-8778 human GSE3365 sample 794	21/339	0.00472909	0.0777982	0	0	1.86868	10.005	HSPA9;SETD5;MGEA5;SAP30BP;SLC38A1;ANXA1;ITGB2;TNFAIP2;ACTB;ACTG1;EEF1A1;SLTM;ZC3H11A;POLE3;DHX15;DCP1A;NDUFV2;UBA52;OGT;GAPDH;SKP1
Type 2 diabetes mellitus C0011860 human GSE12643 sample 274	17/254	0.00494921	0.0798536	0	0	2.01898	10.7178	B4GALT1;PPP1R12A;SMURF2;CHD9;NCBP2;MICAL2;ZBTB20;RRBP1;THOC2;BICD1;DCBLD2;CAPZB;DLC1;ERF;VCL;LIMS1;TGM2
Hereditary gingival fibromatosis C0399440 human GSE4250 sample 177	20/321	0.00540196	0.085514	0	0	1.8795	9.81284	LGALS3BP;PIGR;ANXA1;NXN;ADIRF;EMP1;MIR21;C12ORF75;PPL;EVPL;ACTB;FAM129B;ACTG1;SCEL;VCAN;CD9;AP3S1;P4HB;MGLL;ND4
myelodysplastic syndrome DOID-0050908 human GSE19429 sample 749	19/300	0.00555925	0.0863743	0	0	1.91051	9.91991	TOP2A;CMTM7;STIL;UHRF1;HMGB2;H2AFV;NUCKS1;DEK;KIF15;AKAP12;EEF1A1;RPS14;NRIP1;COX3;DHX15;CD9;ANP32B;CALM2;GAPDH
autism spectrum disorder DOID-0060041 human GSE62632 sample 1036	19/301	0.00575625	0.0878089	0	0	1.90416	9.82065	CA12;NRP2;TNC;GLIS3;LRP5;NEDD4L;PRKCA;LTBP2;PPP2R3A;SYNE1;FAM160A1;VCAN;PARD3;GNAQ;TRPS1;NRIP1;HIVEP2;FNIP2;RBMS3
diabetes mellitus type 2 DOID-9352 human GSE12643 sample 766	21/346	0.00594392	0.0890527	0	0	1.83088	9.38396	TOP2A;CA12;SVIL;MBNL2;RABGAP1;TNC;TNFAIP2;ADIRF;SARS;NMNAT2;SDHA;PPL;LITAF;CENPF;AIM1;ALCAM;NFIB;RPS6KA2;CD9;ROR1;NFE2L2
Hypotensive episode C0520541 rat GSE2401 sample 388	17/261	0.0064549	0.0950115	0	0	1.96483	9.90847	APP;NCBP1;PLLP;SDHA;EEF2;ACTB;NCOR2;CAPZB;ZMIZ1;CANX;COX2;PLXNB2;CD9;COX1;CYTB;EZR;CALM2
Urothelial carcinoma in situ C0334267 human GSE3167 sample 229	15/220	0.00679056	0.098229	0	0	2.05677	10.2678	LGALS3BP;TNFAIP2;ADIRF;EEF2;ACTB;TRIOBP;EEF1A1;RPS14;ARVCF;RPL35;FLNA;PLXNB2;CD9;P4HB;GAPDH
Crohn's disease DOID-8778 human GSE6731 sample 758	17/263	0.0069473	0.098793	0	0	1.94989	9.68978	MBNL2;MGST3;GAB1;ADIRF;EMP1;ZBTB20;COBL;THOC2;PRSS23;CD2AP;KTN1;GNA13;GNAQ;NRIP1;CD9;ZC3H13;LIMS1
Status Epilepticus C0038220 rat GSE4236 sample 391	17/264	0.00720464	0.100745	0	0	1.9425	9.58242	GDA;MGST3;CBX1;HDLBP;UQCR11;ARHGAP39;SDHA;ACTG1;RPS14;COX3;RARA;COX1;NDUFV2;UBA52;CALM2;GAPDH;ND5
Huntington's disease DOID-12858 mouse GSE3583 sample 929	18/293	0.00923259	0.126986	0	0	1.8532	8.68225	SCARA3;SLC38A1;ITGA3;MAGI3;PCDH7;TNC;ZBTB20;VLDLR;PPL;LYPD6;PTPRF;AKAP12;AIM1;ALCAM;NCEH1;PLCB4;SALL1;TRABD2B
bronchopulmonary dysplasia UMLS CUI-C0006287 human GSE8586 sample 919	18/295	0.00985942	0.13342	0	0	1.84063	8.50248	NXN;IRS2;ACTN4;C12ORF75;EEF2;HSPG2;ACTB;ACTG1;LASP1;VCAN;FLNA;COX1;MALAT1;P4HB;GAPDH;VCL;TGM2;RAI14
Rift Valley fever DOID-1328 mouse GSE18064 sample 875	21/363	0.00998648	0.132995	0	0	1.74514	8.03901	OSER1;ERRFI1;ANXA1;PLAUR;SARS;HMGA2;EEF2;LITAF;FAM129B;ACTG1;AKAP12;NCL;RPL35;FLNA;TRIB3;CHAC1;SLIRP;TNS3;GAPDH;RNF111;MGLL
Generalized seizures C0234533 rat GSE1156 sample 342	19/318	0.0100753	0.13208	0	0	1.80237	8.28669	ATP6V1A;APP;NRP1;MGST3;SDHA;EEF2;ACTG1;INPP4A;COX3;RARA;COX1;HIVEP2;SEC62;TNS3;CALM2;DBN1;ND5;SPTBN2;ND4
bronchopulmonary dysplasia UMLS CUI-C0006287 human GSE8586 sample 918	21/364	0.0102803	0.132695	0	0	1.74034	7.96646	APP;ERRFI1;MACF1;RABGAP1;NXN;TNFAIP2;SHROOM3;MIR21;ACTN4;EEF2;HSPG2;PRSS23;ACTB;ACTG1;EEF1A1;COX3;ABL1;FLNA;ANP32B;P4HB;UBA52
Dry eye syndrome C0013238 rat GSE844 sample 228	19/320	0.0107202	0.136276	0	0	1.7911	8.12377	EIF5B;MGST3;HDLBP;UQCR11;RRBP1;EEF2;LITAF;RPS14;COX3;RARA;COX2;COX1;CYTB;P4HB;CALM2;ND5;SMIM12;ND4;METAP2
rheumatoid arthritis DOID-7148 human GSE15573 sample 904	19/321	0.0110548	0.138432	0	0	1.78552	8.04359	TRABD;CMTM7;MGEA5;PRKCH;FNBP1;ITGB2;SARS;EEF2;LITAF;ACTB;ACTG1;LASP1;SPOCK2;FAM120A;SIRPA;ANP32B;UBA52;NDEL1;NKTR
esophagus squamous cell carcinoma DOID-3748 human GSE63941 sample 659	22/391	0.0114948	0.141826	0	0	1.69731	7.57997	ITGB1;RNF11;ANXA1;SMURF2;BDNF;CTR9;EMP1;LTBP2;SLC7A11;C12ORF75;TFPI;ACTG1;TGFBR2;EXT1;LASP1;VCAN;ASPH;MALAT1;AP3S1;MMADHC;VCL;RAI14
idiopathic pulmonary fibrosis DOID-0050156 human GSE44723 sample 851	18/300	0.011576	0.140757	0	0	1.80995	8.07027	TOP2A;SCARA3;THRB;LIMCH1;HMGB2;ADIRF;MKI67;ARHGAP6;EREG;KIF15;RAD51B;ANLN;CENPF;AIM1;ZNF608;NFIB;KIF20A;CREB5
Essential Hypertension C0085580 rat GSE1675 sample 412	18/301	0.0119461	0.143183	0	0	1.80394	7.98668	APP;DDX46;MGST3;CBX1;HUWE1;UQCR11;LITAF;ACTG1;RPS14;NCL;COX1;CYTB;P4HB;EZR;NDUFV2;UBA52;MGLL;NFE2L2
Retinal damage C0235272 rat GSE1001 sample 312	17/279	0.0120728	0.142663	0	0	1.83807	8.11837	ATP6V1A;IQSEC1;PHF12;HUWE1;HDLBP;EEF2;ACTB;EEF1A1;CDC34;NCL;CANX;COX3;CYTB;UBA52;SPTAN1;GAPDH;ND4
JRA - Juvenile rheumatoid arthritis C0553662 human GSE7753 sample 176	17/280	0.0124721	0.145335	0	0	1.8315	8.02978	SMURF2;CRIM1;TNFAIP2;IRS2;NEAT1;EEF2;ACTG1;EEF1A1;MORF4L1;CANX;COX3;COX2;COX1;MALAT1;UBA52;CALM2;ND4
Asthma, allergic C0155877 mouse GSE3184 sample 436	18/304	0.0131131	0.150711	0	0	1.78614	7.74138	ERRFI1;LIMCH1;IRS1;ACTN4;NEAT1;EEF2;PPL;PTPRF;BICC1;AKAP12;EEF1A1;RPS14;SCEL;SNRK;SCNN1A;SPTAN1;VCL;NFE2L2
Senescence C0001792 mouse GSE5078 sample 331	18/307	0.0143681	0.162904	0	0	1.76869	7.50408	MBD3;MACF1;PLEKHB2;UQCR11;TUBG1;RANGAP1;KALRN;EPN1;ACTG1;SPOCK2;FAM120A;OGDH;ANKRD10;TOP1;AGRN;CALM2;ST6GALNAC5;SPTBN2
Sickle Cell Anemia C0002895 human GSE9877 sample 109	13/197	0.0144762	0.16194	0	0	1.99064	8.43088	APP;MACF1;NXN;LTBP2;EEF2;ACTB;ACTG1;EEF1A1;ALCAM;SNRPF;SLIRP;CALM2;VCL
Type 2 diabetes mellitus C0011860 rat GSE3068 sample 335	17/285	0.0146274	0.161479	0	0	1.79937	7.60209	HSPA9;ITGB1;MGST3;SGTA;UQCR11;SDHA;EEF2;ACTG1;CDC34;COX3;COX2;COX1;CYTB;NDUFV2;ND5;ND4;PTPN3
Arthropathy C0022408 human GSE10575 sample 271	22/401	0.015004	0.163486	0	0	1.65499	6.95001	CA12;RNF11;UHRF1;CBX1;CRIM1;HMGB2;SLC39A10;ADIRF;PLOD1;ACTN4;VLDLR;DEK;C12ORF75;SDHA;LASP1;SMS;TSPAN4;FLNA;TRIB3;P4HB;ANP32B;MGLL
Barrett's esophagus DOID-9206 human GSE1420 sample 643	17/286	0.0150914	0.162329	0	0	1.79308	7.51951	ADIRF;EMP1;PPL;EVPL;SCEL;AIM1;RPL35;FLNA;CD9;PKP3;P4HB;UBA52;GAPDH;MMADHC;MGLL;SKP1;NFE2L2
Zaire ebolavirus DOID-4325 human GSE31747 sample 497	17/287	0.0155667	0.165323	0	0	1.78683	7.4379	ATP6V1A;EMP1;UQCR11;DEK;SDHA;ACTB;EEF1A1;LASP1;DUSP10;CAPZB;NCL;CANX;POLE3;TSPAN4;CALM2;GAPDH;VCL
type 2 diabetes mellitus DOID-9352 human GSE13760 sample 882	21/380	0.0160003	0.167803	0	0	1.66706	6.89355	OSBPL9;RNF11;RABGAP1;MGST3;TNC;CRIM1;ADIRF;ASAP2;DEK;GRAMD3;NT5C2;ACTG1;LASP1;PDGFC;PLS3;AP3S1;SEC62;TNS3;MMADHC;VCL;RAI14
endometrial cancer DOID-1380 human GSE17025 sample 847	21/380	0.0160003	0.165731	0	0	1.66706	6.89355	ERRFI1;PIGR;NXN;HUWE1;VLDLR;EEF2;ACTB;ACTG1;EEF1A1;RPS14;FAM111A;MORF4L1;VCAN;SLK;SLTM;ALDH1A2;DHX15;RPL35;ANP32B;SKP1;LIMS1
Neurofibromatosis DOID-8712 mouse GSE1482 sample 665	19/335	0.0166723	0.170586	0	0	1.7109	7.00445	MBD3;ATP6V1A;ITGB1;MACF1;MGEA5;RNF11;UBE2B;BDNF;ARL3;ARHGAP39;LMO7;ACTB;ACTG1;EEF1A1;MORF4L1;NFIB;OGDH;HIVEP2;GAPDH
Duchenne muscular dystrophy (DMD) C0013264 mouse GSE1008 sample 298	16/267	0.0168328	0.170153	0	0	1.8077	7.38339	FTO;HSPA9;RNF11;UBE2B;ARL3;LMO7;SDHA;PRSS23;ACTB;EEF1A1;GOLGA4;PLS3;SLIRP;NDUFV2;GAPDH;KPNA1
Barrett's esophagus DOID-9206 human GSE13083 sample 917	15/246	0.0175715	0.175506	0	0	1.83938	7.43383	PRKCH;ADIRF;EMP1;VLDLR;PPL;EVPL;EREG;SCEL;ITCH;ABLIM3;ZNHIT6;TRPS1;CHAC1;EPHA2;PHACTR4
Parkinson's disease DOID-14330 human GSE19587 sample 496	20/361	0.0179805	0.177478	0	0	1.67124	6.71583	FTO;MACF1;SLC38A1;FNBP1;ZBTB20;EEF2;ACTB;PTPRF;ACTG1;EEF1A1;MORF4L1;SPOCK2;CANX;RPL35;CD9;MAP4;ANP32B;UBA52;SPTAN1;GAPDH
Premature aging C0231341 human GSE10123 sample 55	17/292	0.0181206	0.176782	0	0	1.75623	7.04374	LGALS3BP;SH2D4A;BDNF;PCDH7;MYOF;ADIRF;SARS;ACTB;ACTG1;EEF1A1;ALCAM;CAPZB;CANX;TSPAN4;FAM3C;SNRPF;PLEC
HIV - Human immunodeficiency virus infection C0019693 human GSE2504 sample 157	13/204	0.0187976	0.181278	0	0	1.92234	7.63942	HUWE1;HMGB2;NUP153;DEK;ACTB;KTN1;ACTG1;EEF1A1;MORF4L1;PDGFC;FAM3C;CALM2;GAPDH
ulcerative colitis DOID-8577 human GSE11223 sample 590	16/271	0.0190774	0.181885	0	0	1.78101	7.05148	PODXL2;MAGI3;PLAUR;DCDC2;SLC7A11;BRCA2;NT5C2;SUMO1;ERI1;RILPL1;NCL;HAS3;TOP1;EZR;PDE9A;EPHA2
colorectal cancer DOID-9256 human GSE1323 sample 763	15/249	0.0193767	0.182663	0	0	1.81722	7.16656	HSPA4;HUWE1;SLC2A1;ADIRF;ACTN4;RPS14;MORF4L1;CANX;CD9;AP3S1;SLIRP;UBA52;GAPDH;SKP1;TGM2
Acute Lung Injury C0242488 mouse GSE1871 sample 152	14/228	0.0201987	0.188297	0	0	1.85229	7.2279	MACF1;LIMCH1;ARL3;CTDSPL;NEAT1;ACTB;ACTG1;EEF1A1;RPS14;ALCAM;MYO18A;TNS3;MYH10;SPTBN1
Atherosclerosis C0004153 human GSE420 sample 234	16/274	0.0209058	0.192747	0	0	1.76151	6.81305	ITGB1;RNF11;ANXA1;B4GALT1;CRIM1;HUS1;LTBP2;HSPG2;EXT1;EEF1A1;ARVCF;VCAN;TNIP1;PLS3;CALM2;MYH10
retinoblastoma DOID-768 mouse GSE6787 sample 455	13/207	0.0209215	0.190795	0	0	1.89448	7.3259	MAP2K3;RNF11;MGST3;SLC2A1;UQCR11;DEK;RANGAP1;EPN1;CDC34;U2AF2;NCL;ANP32B;TOP1
Autism DOID-0060041 human GSE25507 sample 464	19/345	0.0218948	0.197524	0	0	1.66131	6.34871	ATP6V1A;HMGB2;ASAP1;ACTN4;DEK;NEAT1;EEF2;LITAF;ACTB;ACTG1;GNA13;MORF4L1;VCAN;AIM1;SEC14L1;FLNA;AP3S1;CALM2;GAPDH
autism spectrum disorder DOID-0060041 human GSE25507 sample 1021	19/346	0.0224792	0.200638	0	0	1.65651	6.28673	ATP6V1A;ANXA1;ITGB2;MIR21;DEK;EEF2;ACTB;ACTG1;TGFBR2;MORF4L1;VCAN;SEC14L1;NCL;COX2;COX1;ANP32B;CALM2;MEGF9;ND4
Diabetic Retinopathy C0011884 rat GSE1979 sample 189	15/254	0.0226943	0.200427	0	0	1.78145	6.74393	SLC2A1;SDHA;EEF2;RPS14;COX3;CD9;COX1;CYTB;SEC62;NDUFV2;TNS3;GAPDH;ND5;SMIM12;ND4
Type 1 diabetes mellitus C0011854 mouse GSE1623 sample 53	20/371	0.0232932	0.203573	0	0	1.62619	6.11383	NRP1;SMARCC1;RBM25;RNF11;MGST3;EMP1;ZBTB20;H2AFV;UQCR11;DEK;MKI67;ELAVL1;NCOR2;ALCAM;NFIB;PLS3;TOP1;SLIRP;LIMS1;NFE2L2
autism spectrum disorder DOID-0060041 human GSE25507 sample 1027	18/324	0.0233511	0.201975	0	0	1.67588	6.29649	ATP6V1A;HMGB2;IRS2;DEK;LITAF;ACTG1;RPS14;VCAN;SEC14L1;RBCK1;AP3S1;UBA52;CALM2;MMADHC;NDEL1;MEGF9;MAP3K5;CREB5
Inflammatory papules (Acne) 6543 human GSE6475 sample 459	17/301	0.0235177	0.20134	0	0	1.70372	6.38896	MGST3;ADIRF;IRS2;EEF2;PPL;ACTG1;EEF1A1;SCEL;MORF4L1;PDGFC;RPL35;PLS3;CD9;ANP32B;CALM2;MMADHC;SPTBN1
Scleroderma C0011644 human GSE1724 sample 155	12/189	0.0239867	0.203281	0	0	1.9153	7.14454	EEF1A1;LGALS3BP;RPS14;ABLIM3;TNIP1;RPL35;FLNA;CD9;LTBP2;EEF2;ACTB;ACTG1
Obstructive sleep apnea C0520679 mouse GSE1873 sample 217	18/325	0.0239886	0.201264	0	0	1.67073	6.23211	ABCC3;NRP1;DIDO1;SCARA3;ZMYND8;MVP;CRIM1;SLC2A1;IRS2;AATF;NEAT1;PTPRD;FAM102A;TSPAN4;TRIP11;MALAT1;TOP1;MAP3K5
Generalized seizures C0234533 mouse GSE6614 sample 169	16/279	0.0242455	0.201406	0	0	1.72994	6.43457	APP;RNF11;H2AFV;ARHGAP39;BAZ1B;KLC1;EEF2;KALRN;ANLN;MORF4L1;SNRK;THRAP3;U2AF2;OGDH;TOP1;SPTBN1
Parkinson's disease DOID-14330 human GSE6613 sample 788	18/326	0.0246393	0.20267	0	0	1.6656	6.16841	ATP6V1A;RNF11;MGST3;ASAP1;SDHA;ACTB;ACTG1;EEF1A1;RPS14;LASP1;FAM102A;TNIP1;NCL;CD9;ANP32B;VCL;SKP1;NFE2L2
asthma DOID-2841 human GSE16032 sample 729	17/303	0.0248671	0.202558	0	0	1.69248	6.25236	RNF11;C2ORF88;HMGB2;IRS2;NEAT1;ACTB;ACTG1;VCAN;AIM1;MGAT5;COX2;COX1;CALM2;GAPDH;VCL;LIMS1;ND4
Huntington's disease DOID-12858 human GSE1751 sample 796	18/327	0.0253033	0.204129	0	0	1.66051	6.10539	MAP2K3;FNBP1;ITGB2;HUWE1;TSC1;ACTN4;AATF;EEF2;ACTB;ACTG1;LASP1;RXRA;CAPZB;NCL;ASXL2;FLNA;UBA52;GAPDH
Androgen insensitivity syndrome C0039585 human GSE3871 sample 415	18/327	0.0253033	0.202185	0	0	1.66051	6.10539	SCARA3;RABGAP1;LIMCH1;UHRF1;ADIRF;SARS;ITPR3;PPP2R3A;C12ORF75;BAIAP2;AKAP12;CDH6;ANLN;PLCB4;RXRA;RPS6KA2;FLNB;TEAD1
Parkinson's disease DOID-14330 human GSE7621 sample 941	15/258	0.0256426	0.202963	0	0	1.75383	6.42517	LGALS3BP;HUWE1;CRIM1;ADIRF;NUCKS1;NEAT1;EEF2;ACTB;ACTG1;COX3;RPL35;COX2;COX1;MALAT1;MMADHC
Meningococcal infection C0025303 human GSE4646 sample 347	13/213	0.0257005	0.201521	0	0	1.84111	6.74076	ATP6V1A;ZMYND8;HUWE1;ACTN4;ACTG1;EEF1A1;SNRK;CALM2;MYH10;GAPDH;MMADHC;LIMS1;RAI14
esophagus squamous cell carcinoma DOID-3748 human GSE20347 sample 607	18/329	0.0266717	0.2072	0	0	1.65041	5.98135	EHF;LIMCH1;ADIRF;EMP1;COBL;VLDLR;PPL;EVPL;TRIOBP;EREG;SCEL;AIM1;ABLIM3;DMXL1;PKP3;CPEB3;MGLL;LGR4
Uterine leiomyoma C0042133 human GSE593 sample 16	18/330	0.0273765	0.210724	0	0	1.64541	5.92031	LGALS3BP;APP;ANXA1;ADIRF;EMP1;NEAT1;ACTB;ACTG1;TGFBR2;AKAP12;EEF1A1;ABL1;FLNA;CD9;CALM2;GAPDH;SPTBN1;VCL
Cushing Syndrome C0010481 human GSE4060 sample 1	16/284	0.0279717	0.213347	0	0	1.69949	6.07833	LGALS3BP;FTX;NEAT1;EEF2;ACTG1;SEC14L1;LONP1;COX3;COX2;COX1;MALAT1;P4HB;UBA52;GAPDH;NDEL1;ND4
Huntington's disease DOID-12858 human GSE24250 sample 466	20/379	0.028349	0.214277	0	0	1.59187	5.67209	MAP2K3;SETD5;PANK2;SLC38A1;MICAL2;SDHA;EEF2;LITAF;ACTB;ACTG1;EEF1A1;RPS14;FAM111A;LASP1;NCL;ANP32B;UBA52;CALM2;VCL;SKP1
amyotrophic lateral sclerosis DOID-332 rat GSE7493 sample 682	17/308	0.0284957	0.213464	0	0	1.665	5.92408	FTO;NRP1;HSPA4;UQCR11;NUP153;EEF1A1;ALCAM;SUMO1;THRAP3;ZNHIT6;NCL;DHX15;COX1;CIC;UBA52;DBN1;LUC7L2
familial hypercholesterolemia DOID-13810 human GSE6054 sample 909	16/285	0.0287654	0.213577	0	0	1.69352	6.00961	ATP6V1A;RNF11;ADAM10;MIR21;LITAF;ACTB;EEF1A1;MORF4L1;NRIP1;RPL35;COX1;ANP32B;CALM2;MMADHC;LIMS1;MAP3K5
cerebral palsy DOID-1969 human GSE31243 sample 877	17/309	0.0292666	0.215392	0	0	1.65961	5.86061	RNF11;IRS1;UQCR11;NUCKS1;DEK;EEF2;PRSS23;OXR1;KTN1;CAPZB;ZC3H11A;NRIP1;OGDH;SLIRP;NDUFV2;TEAD1;GAPDH
inflammatory bowel disease DOID-0050589 human GSE4183 sample 551	15/263	0.0297183	0.216814	0	0	1.72049	6.04923	CA12;ADIRF;EMP1;C12ORF75;EEF2;ACTG1;EEF1A1;RPS14;COX3;COX2;CD9;COX1;MALAT1;GAPDH;ND4
Bipolar Disorder 3312 human GSE12654 sample 461	18/334	0.0303364	0.219416	0	0	1.62571	5.68251	FTO;LGALS3BP;DOCK4;MAST4;MGST3;MICAL2;RANGAP1;LASP1;SPOCK2;ARIH2;CEP170B;P4HB;CIC;AGRN;CALM2;SPTAN1;SKP1;SPTBN2
CML - Chronic myeloid leukemia C0023473 human GSE11889 sample 403	15/266	0.0323821	0.23221	0	0	1.70109	5.83498	C11ORF95;SLC38A1;SMURF2;HUWE1;HMGB2;IRS2;DEK;ACTB;EREG;ACTG1;AIM1;ALCAM;PDGFC;CANX;CALM2
Serous carcinoma C0206701 human GSE10971 sample 58	17/313	0.0325057	0.231121	0	0	1.6384	5.61373	MAP2K3;FTO;ERRFI1;LIMCH1;GDA;IRS1;CRIM1;ARHGAP18;MIR21;GRAMD3;EEF2;LITAF;EEF1A1;ALCAM;SALL1;SLTM;MALAT1
multiple myeloma DOID-9538 human GSE36474 sample 707	18/338	0.0335285	0.23639	0	0	1.60647	5.45454	TOP2A;STIL;CDCA2;ITGA3;UHRF1;TNC;DEK;MKI67;BRCA2;KIF15;ANLN;KIAA1524;CENPF;NCEH1;KIF20A;WHSC1;EZR;PLEC
Uterine leiomyoma C0042133 human GSE2724 sample 225	18/338	0.0335285	0.23442	0	0	1.60647	5.45454	SPON1;ANXA1;HUWE1;HMGB2;ADIRF;IRS2;LTBP2;ACTN4;EEF1A1;ATXN1;FLNA;ANP32B;TNS3;UBA52;CALM2;SPTAN1;MYH10;SKP1
Barrett's esophagus DOID-9206 human GSE34619 sample 453	16/291	0.0338827	0.234939	0	0	1.65861	5.61414	PRKCH;ANXA1;EMP1;VLDLR;PPL;MPP7;THSD4;EREG;FAM129B;SCEL;AIM1;ABLIM3;TRPS1;GRPEL2;PLS3;C3ORF67
familial hypercholesterolemia DOID-13810 human GSE6088 sample 908	17/317	0.0360021	0.247588	0	0	1.61773	5.37762	ITGB2;NUCKS1;NEAT1;LITAF;ACTB;TGFBR2;EEF1A1;MORF4L1;VCAN;SNRK;COX3;RPL35;COX2;MALAT1;ANP32B;SNRPF;OGT
myelodysplastic syndrome DOID-0050908 human GSE19429 sample 750	17/317	0.0360021	0.245575	0	0	1.61773	5.37762	CMTM7;SLC38A1;ANXA1;UHRF1;HMGB2;PLAUR;NEAT1;KTN1;AKAP12;EEF1A1;GNA13;RPS14;NRIP1;COX3;CD9;MALAT1;GAPDH
Chronic phase chronic myelogenous leukemia DOID-8552 human GSE5550 sample 456	15/270	0.0361999	0.244933	0	0	1.67588	5.56175	MACF1;ACTG1;AKAP12;EEF1A1;RPS14;VCAN;NRIP1;RPL35;PLS3;SH3BP4;FLNB;CDK13;GAPDH;NKTR;BPTF
anemia DOID-2355 human GSE4619 sample 793	16/294	0.0366776	0.24618	0	0	1.64168	5.42673	TOP2A;ANXA1;UHRF1;HMGB2;PLAUR;H2AFV;DEK;EREG;AKAP12;EEF1A1;RPS14;COX3;DHX15;CD9;ANP32B;SKP1
Escherichia coli infection of the central nervous system C1320188 mouse GSE3253 sample 341	13/225	0.0375939	0.250328	0	0	1.74292	5.71837	ATP6V1A;PLLP;DEK;KLC1;ACTB;SYNE1;MAPK10;RPS14;SNRK;MALAT1;UBA52;GAPDH;SPTBN1
polycystic ovary syndrome DOID-11612 human GSE48301 sample 560	15/275	0.0414172	0.273615	0	0	1.64541	5.23909	TOP2A;SVIL;ANXA1;PCDH7;ARHGAP18;MKI67;C12ORF75;KIF15;ANLN;CENPF;CD9;SNRPF;CLSPN;SLIRP;NDUFV2
Hypoxia C0242184 human GSE4483 sample 440	15/275	0.0414172	0.271477	0	0	1.64541	5.23909	TOP2A;MACF1;UHRF1;H2AFV;DEK;ACTB;DCBLD2;ACTG1;LASP1;NCL;COX3;RPL35;COX2;VCL;ND4
Emery-Dreifuss muscular dystrophy DOID-11726 mouse GSE6399 sample 675	18/347	0.0416083	0.270615	0	0	1.5648	4.97522	MGST3;UQCR11;PPP2R3A;TOB2;HSPG2;ACTB;EPN1;ACTG1;EEF1A1;CDC34;CAPZB;OGDH;MYO18A;NDUFV2;UBA52;SPTAN1;MGLL;PLEC
myelodysplastic syndrome DOID-0050908 human GSE19429 sample 747	15/276	0.0425218	0.274429	0	0	1.63945	5.17696	CMTM7;DDX46;PLAUR;DEK;AKAP12;EEF1A1;GNA13;RPS14;COX3;COX2;CD9;MALAT1;EZR;UBA52;GAPDH
Breast Cancer C0006142 human GSE2429 sample 148	17/324	0.0427698	0.273922	0	0	1.58278	4.9888	CA12;FTO;SLC38A1;CRIM1;ADIRF;ACTN4;FNBP1L;EEF2;PTPRF;KTN1;EEF1A1;AIM1;ALCAM;FLNA;CD9;FLNB;UBA52
Parkinson's disease DOID-14330 human GSE19587 sample 740	12/207	0.0436134	0.277209	0	0	1.74875	5.47776	EEF1A1;MORF4L1;SLC38A1;HUWE1;MAP4;ANP32B;TNS3;UBA52;CALM2;GAPDH;ACTB;ACTG1
prostate cancer DOID-10283 human GSE55945 sample 834	17/325	0.0438064	0.276343	0	0	1.57791	4.93566	FTO;ERRFI1;ANXA1;B4GALT1;NXN;MGST3;ADIRF;SLC39A10;ZBTB20;LITAF;ACTB;FLNA;CD9;UBA52;GAPDH;VCL;DUXAP10
esophagus adenocarcinoma DOID-4914 human GSE1420 sample 644	15/278	0.0447936	0.280462	0	0	1.62766	5.055	SVIL;RNF11;ANXA1;EMP1;EEF2;PPL;SCEL;AIM1;CD9;PKP3;GAPDH;MMADHC;VCL;SKP1;NFE2L2
Thymic Carcinoma C0205969 mouse GSE2501 sample 344	18/351	0.0456185	0.283511	0	0	1.54697	4.77618	TOP2A;MGEA5;PPTC7;ITGB2;EMP1;H2AFV;ELAVL1;ACTB;ACTG1;INPP4A;FAM102A;FAM120A;ANP32E;AP3S1;TOP1;EZR;CALM2;OGT
Spinal Cord Injury C0037929 rat GSE2599 sample 426	18/351	0.0456185	0.281426	0	0	1.54697	4.77618	ATP6V1A;IQSEC1;PLLP;MGST3;SLC2A1;UQCR11;B3GALT5;SDHA;KLC1;SPOCK2;COX2;COX1;SEC62;NDUFV2;CALM2;GAPDH;ND5;ND4
invasive ductal carcinoma DOID-3008 human GSE21422 sample 606	16/304	0.0472018	0.289068	0	0	1.58768	4.8477	ANXA1;CRIM1;ADIRF;EMP1;IRS2;EEF2;TGFBR2;EEF1A1;RPS14;MORF4L1;NFIB;RPL35;PLS3;ANP32B;UBA52;MGLL
polycystic ovary syndrome DOID-11612 human GSE48301 sample 818	19/378	0.0482029	0.29306	0	0	1.51628	4.59786	TOP2A;MBNL2;SARS;ARHGAP18;UQCR11;MKI67;C12ORF75;PRSS23;KIF15;ACTG1;ANLN;CENPF;SEC14L1;CD9;FLNB;FAT4;P4HB;PAK2;GAPDH
Rotavirus infection of children C1442797 human GSE2729 sample 43	16/307	0.0507375	0.30625	0	0	1.57216	4.68677	ITGB2;TNFAIP2;UQCR11;EEF2;ACTB;ACTG1;EEF1A1;RPS14;HADHA;LASP1;VCAN;CAPZB;NCL;RPL35;CALM2;VCL
Alpha-1 anti-trypsin deficiency C0221757 human GSE1122 sample 281	18/356	0.0510113	0.305704	0	0	1.52524	4.53868	MVP;ADIRF;SARS;TGFBR2;ARVCF;VCAN;SEC14L1;CANX;RPL35;FLNA;MAP4;ANP32B;NDUFV2;UBA52;GAPDH;MGLL;VCL;BPTF
Cardiomyopathy C0878544 human GSE5406 sample 88	16/309	0.0531952	0.31653	0	0	1.56199	4.58254	MBNL2;IRS1;VPS13D;CRIM1;COBL;IRS2;TUBG1;GRAMD3;RANGAP1;PPL;TGFBR2;CBS;POLE3;OGDH;ABL1;TGM2
autism spectrum disorder DOID-0060041 human GSE25507 sample 1031	15/285	0.0534187	0.315622	0	0	1.58768	4.65126	PRKCH;HUWE1;NEAT1;EEF2;ACTB;ACTG1;TGFBR2;EEF1A1;SPOCK2;PCED1B;DHX15;ANP32B;UBA52;OGT;GAPDH
glioblastoma UMLS CUI-C0017636 human GSE15824 sample 862	15/285	0.0534187	0.313414	0	0	1.58768	4.65126	APP;RNF11;FNBP1;PLLP;ANLN;MORF4L1;SALL1;FMNL2;SLTM;DMXL1;COX2;PLS3;MAP4;ANP32B;ND4
Fracture of femur C0015802 rat GSE1685 sample 240	10/168	0.0535633	0.312081	0	0	1.79559	5.2555	MGST3;COX3;RARA;COX2;COX1;CYTB;NDUFV2;ND5;EPN1;ND4
Cerebral Infarction C0007785 mouse GSE63 sample 262	20/408	0.0537334	0.310912	0	0	1.47872	4.32337	FTO;ATP6V1A;MACF1;PPTC7;PLEKHB2;ARHGAP39;LMO7;EEF2;RANGAP1;EPN1;SEC14L1;NCL;SPOCK2;OGDH;TSPAN4;CIC;OGT;SPTAN1;SPTBN1;SPTBN2
oligodendroglioma DOID-3181 human GSE15824 sample 859	16/310	0.0544547	0.312928	0	0	1.55695	4.53133	APP;FNBP1;LIMCH1;PLLP;NEAT1;PTPRD;ANLN;MORF4L1;ALCAM;FMNL2;COX2;COX1;MAP4;ANP32B;CALM2;ND4
invasive ductal carcinoma DOID-3008 human GSE5764 sample 626	17/335	0.0551775	0.314925	0	0	1.53081	4.43505	OSBPL9;ERRFI1;PIGR;EHF;ANXA1;EMP1;ACTN4;VLDLR;NEAT1;EEF2;SUMF1;EEF1A1;PLXNB2;FLNB;MALAT1;ME3;MGLL
myotonic dystrophy type 1 DOID-11722 human GSE7179 sample 1050	13/239	0.0558847	0.316806	0	0	1.64082	4.7329	ITGB1;APP;CBX1;EEF2;EEF1A1;COX2;COX1;MALAT1;ANP32B;AP3S1;UBA52;GAPDH;ND4
idiopathic pulmonary fibrosis DOID-0050156 human GSE44723 sample 850	16/312	0.0570354	0.321159	0	0	1.54697	4.43065	ERRFI1;DOCK4;THRB;SLC7A11;TFPI;ARHGAP6;ARHGAP24;EREG;MAPK10;ANLN;ZNF608;SALL1;EPHB2;MAP3K5;CREB5;RBMS3
prostate cancer DOID-10283 human GSE30174 sample 866	10/170	0.0571325	0.319561	0	0	1.77447	5.0792	MAP2K3;LASP1;SEC14L1;ITGB2;MIR21;EEF2;UBA52;LITAF;ACTG1;ND4
Leukemia, Chronic T-Cell C2363142 human GSE5788 sample 74	16/313	0.0583568	0.324247	0	0	1.54203	4.38118	ANXA1;USP16;HUWE1;NUCKS1;IRS2;LITAF;FHIT;TGFBR2;EEF1A1;MORF4L1;AIM1;SEC62;NDUFV2;UBA52;CALM2;MMADHC
Barrett's esophagus DOID-9206 human GSE34619 sample 596	15/289	0.058832	0.324737	0	0	1.5657	4.43575	PRKCH;ANXA1;EMP1;VLDLR;PPL;EVPL;MPP7;EREG;FAM129B;SCEL;AIM1;ABLIM3;GRPEL2;C3ORF67;SPTBN2
Bone fracture C0016658 rat GSE594 sample 275	13/241	0.0589169	0.32308	0	0	1.62721	4.60764	GDA;MGST3;HMGB2;UQCR11;ASPH;COX3;COX2;COX1;CYTB;NDUFV2;ND5;ND4;METAP2
anemia DOID-2355 human GSE4619 sample 791	15/290	0.0602417	0.3282	0	0	1.56031	4.38351	ANXA1;DDX46;PLAUR;IRS2;NEAT1;EREG;ACTG1;EEF1A1;RPS14;RPL35;CD9;AP3S1;EZR;GAPDH;SKP1
Protozoan Infection C0033740 human GSE2077 sample 239	14/266	0.0605252	0.327617	0	0	1.58768	4.45296	MGST3;HDLBP;CRIM1;SARS;UQCR11;SDHA;EEF2;PPL;KTN1;RPS14;TNIP1;NRIP1;RPL35;PLXNB2
Retinoschisis C0152439 mouse GSE5581 sample 146	11/196	0.0624727	0.335991	0	0	1.69298	4.69469	EEF1A1;RPS14;MORF4L1;U2AF2;RRP1;SDHA;UBA52;CALM2;GAPDH;ACTB;ACTG1
polycystic ovary syndrome DOID-11612 human GSE48301 sample 558	23/492	0.0627004	0.335068	0	0	1.4102	3.90538	TOP2A;SLC38A1;NRP2;PRKCH;HUS1;EMP1;SARS;SLC7A11;PRSS23;SKA2;ACTG1;TGFBR2;SEC14L1;CAPZB;HECW2;GRPEL2;IL3RA;CD9;FLNB;ADAMTS9;GAPDH;EXOSC2;TGM2
endometriosis DOID-289 human GSE6364 sample 947	19/391	0.0631124	0.335135	0	0	1.46586	4.04994	ATP6V1A;ERRFI1;ANXA1;MGST3;ZBTB20;ADIRF;SHROOM3;IRS2;MIR21;NEAT1;EEF2;VCAN;FLNA;PLS3;CD9;P4HB;UBA52;GAPDH;MAP3K5
Parkinson's disease DOID-14330 human GSE19587 sample 741	21/442	0.0637827	0.336564	0	0	1.43322	3.94462	FTO;LGALS3BP;SLC38A1;CLUH;FNBP1;PLLP;MGST3;SARS;ACTN4;EEF2;SDHA;RPS14;FAM102A;NCL;RPL35;CD9;MAP4;ANP32B;UBA52;GAPDH;SPTAN1
Hepatitis C infection C0019196 human GSE2067 sample 309	11/197	0.0642936	0.33714	0	0	1.68439	4.62247	EEF1A1;B4GALT1;NCL;HDLBP;RPL35;UQCR11;P4HB;TFPI;UBA52;GAPDH;ACTG1
Type 1 diabetes mellitus C0011854 mouse GSE4616 sample 363	17/343	0.0656446	0.342086	0	0	1.4951	4.07192	ITGB1;NRP1;RNF11;PLEKHB2;PPTC7;HDLBP;EMP1;UQCR11;HSPG2;ACTB;ACTG1;INPP4A;CDC34;OGDH;NDUFV2;GAPDH;LIMS1
prostate cancer DOID-10283 human GSE3868 sample 638	17/344	0.0670416	0.347209	0	0	1.49076	4.02869	LGALS3BP;APP;SLC38A1;ACTN4;EEF2;ACTG1;AKAP12;EEF1A1;MORF4L1;CANX;FLNA;PLS3;ANP32B;AP3S1;MYH10;VCL;NFE2L2
Bipolar Disorder C0005586 human GSE5389 sample 302	19/395	0.0682778	0.351442	0	0	1.45102	3.89478	ATP6V1A;APP;RNF11;DOCK4;PLEKHB2;LIMCH1;MGST3;COBL;NUCKS1;OXR1;PTPRD;MORF4L1;ATXN1;NCL;AP3S1;FAM3C;SEC62;CALM2;SKP1
Dehydration C0011175 rat GSE4130 sample 23	18/370	0.0684704	0.350285	0	0	1.46753	3.93497	APP;EEF2;ACTG1;MORF4L1;ALCAM;FAM120A;COX2;ANKRD10;COX1;FAM3C;CYTB;P4HB;EZR;CALM2;SPTAN1;GAPDH;MMADHC;SKP1
Type 1 diabetes mellitus C0011854 mouse GSE1659 sample 346	13/248	0.070393	0.357938	0	0	1.58128	4.19618	HSPA9;PIGR;RNF11;PPTC7;ZBTB20;UQCR11;SDHA;ACTB;ACTG1;OGDH;SLIRP;NDUFV2;GAPDH
Dehydration C0011175 rat GSE4130 sample 210	16/322	0.0712029	0.359875	0	0	1.49893	3.9605	SPON1;SHROOM2;UQCR11;SLC7A11;SDHA;ACTB;EEF1A1;RPS14;ALCAM;ALDH1A2;FAM120A;RPL35;CD9;SEC62;CIC;SKP1
Primary open angle glaucoma C0339573 human GSE2705 sample 257	13/249	0.0721437	0.362446	0	0	1.57493	4.14063	NRP1;SVIL;DOCK4;SMAD3;FNBP1;ZBTB20;HMGA2;NEAT1;TFPI;PPL;FAM111A;AIM1;ANKRD10
Appendicitis C0003615 human GSE9579 sample 98	15/298	0.0723497	0.361318	0	0	1.51842	3.98774	CA12;LGALS3BP;APP;MGST3;HMGB2;UQCR11;ACTN4;EEF2;ACTB;ACTG1;EEF1A1;FLNA;CD9;MGLL;VCL
Familial combined hyperlipidaemia C0020474 human GSE1010 sample 137	18/374	0.0741233	0.367985	0	0	1.45184	3.77771	MGST3;CBX1;H2AFV;HNF1B;ACTB;MORF4L1;NASP;TNIP1;NCL;ANP32B;AP3S1;SNRPF;SLIRP;NDUFV2;CALM2;GAPDH;MMADHC;SKP1
Infection by Aspergillus fumigatus C0276655 human GSE6965 sample 386	15/300	0.0756108	0.373162	0	0	1.5083	3.89465	PPP1R12A;SMURF2;RHBDF2;MYO9B;NEAT1;EREG;SPSB1;TBC1D2;ALCAM;NCEH1;ALDH1A2;IL3RA;NRIP1;MALAT1;TGM2
muscular dystrophy DOID-9884 human GSE42806 sample 530	16/325	0.0758734	0.372268	0	0	1.48509	3.82959	SPEN;SETD5;SETD2;MBNL2;B4GALT1;PRPF40A;HSPG2;RPS14;ITCH;UBN2;NRIP1;OGDH;RPL35;EZR;NDUFV2;NKTR
ulcerative colitis DOID-8577 human GSE37283 sample 594	20/429	0.0801052	0.390746	0	0	1.40634	3.55018	ATP6V1A;ERRFI1;GDA;MACC1;MYOF;TNC;PLAUR;EMP1;SLC39A10;ADAM10;NEAT1;TRHDE;MYO1E;FUT8;PKP3;OR7E47P;TINAG;THOP1;KPNA1;RAI14
familial hypercholesterolemia DOID-13810 human GSE6088 sample 907	14/279	0.0820848	0.398088	0	0	1.5137	3.78426	ITGB1;ANXA1;ITGB2;NEAT1;ACTB;VCAN;COX3;RPL35;COX2;P4HB;UBA52;CALM2;OGT;GAPDH
Ventricular hypertrophy C0340279 mouse GSE4678 sample 313	14/280	0.0839235	0.404666	0	0	1.5083	3.73733	PLEKHB2;LIMCH1;LMO7;HSPG2;ACTB;U2AF2;MYO18A;RPL35;ANO10;P4HB;CPEB3;CALM2;MMADHC;METAP2
Obesity C0028754 rat GSE1813 sample 15	14/281	0.0857883	0.411293	0	0	1.50293	3.691	MGEA5;SPON1;MYOF;TNC;EEF2;EEF1A1;RPS14;ALCAM;THRAP3;FAM120A;RPL35;PLXNB2;TMCC2;P4HB
Type 2 diabetes mellitus C0011860 rat GSE6428 sample 291	16/331	0.0858087	0.409054	0	0	1.45817	3.58074	MBD3;ATP6V1A;APP;IRS2;EEF2;LITAF;PRSS23;ACTG1;EEF1A1;PPP4R2;TMEM248;NCL;CANX;FAM120A;P4HB;TNS3
Cancer of prostate C0376358 mouse GSE1413 sample 48	15/306	0.0859655	0.407486	0	0	1.47872	3.6285	SLC38A1;LIMCH1;IRS1;HDLBP;ACTB;ACTG1;EEF1A1;RPS14;U2AF2;CBS;RPL35;FLNA;P4HB;UBA52;TGM2
Tachycardia C0039231 rat GSE7999 sample 244	11/208	0.0866043	0.408208	0	0	1.59531	3.90278	ASPH;OGDH;COX2;ANO10;COX1;UQCR11;CYTB;SDHA;NDUFV2;CALM2;GAPDH
Adenocarcinoma of esophagus C0279628 human GSE1420 sample 164	14/282	0.0876791	0.410965	0	0	1.4976	3.64526	SVIL;ANXA1;FNBP1;EMP1;EEF2;PPL;SCEL;AIM1;FLNA;CD9;GAPDH;MMADHC;VCL;NFE2L2
relapsing-remitting multiple sclerosis DOID-2378 human GSE16461 sample 879	17/359	0.0904346	0.421526	0	0	1.42847	3.43279	PRKCH;USP16;ITGB2;PLAUR;IRS2;NEAT1;EEF2;ACTB;EREG;ACTG1;TGFBR2;AIM1;COX2;FLNA;COX1;TOP1;UBA52
APECED - Autoimmune polyendocrinopathy-candidiasis-ectodermal dystrophy C0085859 mouse GSE85 sample 6	16/334	0.0910763	0.422171	0	0	1.44507	3.46248	HSPA9;APP;PIGR;MGEA5;SMARCC1;ANXA1;PPTC7;SHROOM3;LMO7;AIM1;THRAP3;U2AF2;OGDH;TOP1;CALM2;SPTBN1
cerebral palsy DOID-1969 human GSE31243 sample 503	15/309	0.0914667	0.421651	0	0	1.46436	3.50244	HSPA9;RNF11;MBNL2;IRS1;UQCR11;NUCKS1;EEF2;PRSS23;KTN1;CAPZB;OGDH;SLIRP;NDUFV2;TEAD1;GAPDH
systemic lupus erythematosus DOID-9074 human GSE10325 sample 692	14/285	0.0935086	0.428709	0	0	1.48183	3.51151	ANXA1;ITGB2;EEF2;LITAF;ACTG1;EEF1A1;HADHA;FAM102A;NCL;SPOCK2;RPL35;SEC62;LIMS1;BPTF
COPD - Chronic obstructive pulmonary disease C0024117 human GSE475 sample 343	15/311	0.0952548	0.434341	0	0	1.45495	3.42087	ANXA1;MGST3;HUWE1;EMP1;DEK;EEF2;ACTB;ACTG1;AKAP12;EEF1A1;HADHA;PLS3;P4HB;UBA52;PTPN3
Cancer of Colon C0007102 human GSE4107 sample 245	17/362	0.0956709	0.433881	0	0	1.41663	3.32461	PIGR;EHF;MGST3;MVP;EMP1;ACTN4;SDHA;EEF2;LITAF;PTPRF;CD2AP;HADHA;AIM1;CD9;MALAT1;GAPDH;MMADHC
bipolar disorder DOID-3312 human GSE5392 sample 573	18/388	0.0963247	0.434497	0	0	1.39945	3.27475	SETD5;APP;RNF11;PLEKHB2;UBE2B;LIMCH1;UQCR11;NUCKS1;ACTB;MORF4L1;LASP1;ATXN1;ZMIZ1;NCL;CD9;AP3S1;FAM3C;UBA52
Duchenne muscular dystrophy DOID-11723 human GSE6011 sample 674	12/237	0.0969461	0.434961	0	0	1.52739	3.56431	OSBPL9;HSPA9;HADHA;USP25;UBE2B;IRS1;OGDH;DEK;CPEB3;TUBG1;NEAT1;PTPN3
Huntington's disease DOID-12858 human GSE1751 sample 795	11/213	0.0981419	0.437985	0	0	1.55786	3.61633	MAP2K3;LASP1;TNIP1;FNBP1;ITGB2;ASXL2;EEF2;UBA52;ACTB;VCL;ACTG1
oligodendroglioma DOID-3181 human GSE15824 sample 858	15/313	0.0991395	0.440095	0	0	1.44565	3.34123	APP;FNBP1;LIMCH1;PLLP;COBL;NEAT1;LITAF;PTPRD;ANLN;FMNL2;PLS3;CD9;MAP4;ANP32B;CALM2
Huntington's disease DOID-12858 mouse GSE3248 sample 722	14/288	0.0995738	0.439697	0	0	1.4664	3.38277	APP;SVIL;PPTC7;BDNF;ARL3;UQCR11;BAIAP2;ITCH;SNRK;P4HB;CALM2;SPTAN1;GAPDH;SPTBN2
Senescence C0001792 rat GSE854 sample 161	15/314	0.101118	0.444178	0	0	1.44105	3.30211	ATP6V1A;GDA;MGST3;UQCR11;SDHA;KLC1;INPP4A;CDCP1;MYO5B;NDUFV2;RAB11FIP3;CALM2;GAPDH;ND5;METAP2
Senescence C0001792 human GSE1572 sample 408	15/314	0.101118	0.441865	0	0	1.44105	3.30211	ATP6V1A;MACF1;MGST3;SARS;UQCR11;NMNAT2;EEF2;ACTB;ACTG1;EEF1A1;SMS;SRGAP3;CALM2;GAPDH;SKP1
psoriasis DOID-8893 human GSE26952 sample 982	15/315	0.103121	0.448282	0	0	1.43647	3.26345	APP;SVIL;PPTC7;FNBP1;FAM208B;ITPR3;RRBP1;FAM129B;SCEL;ZNHIT6;PKP3;SPTAN1;OGT;LIMS1;MAP3K5
Gamma-hydroxybutyric acidaemia C0268631 mouse GSE2866 sample 409	11/216	0.105484	0.45619	0	0	1.53623	3.45528	INPP4A;EEF1A1;APP;MORF4L1;B4GALT1;PLEKHB2;BDNF;UBTF;KALRN;CALM2;SPTBN1
peripartum cardiomyopathy DOID-9997 human GSE42955 sample 817	16/342	0.106108	0.456538	0	0	1.41127	3.1659	ABCC4;CRIM1;CTDSPL;MIR21;NMNAT2;DEK;TFPI;BICC1;TGFBR2;FAM160A1;TMEM245;RPS6KA2;NRIP1;DLEU1;B4GALNT3;SMIM12
ALS (Amyotrophic Lateral Sclerosis) C0002736 mouse GSE4390 sample 389	17/368	0.106708	0.456774	0	0	1.39353	3.11826	APP;MACF1;MGEA5;RNF11;PLEKHB2;MGST3;NUCKS1;EPN1;ACTG1;MORF4L1;SUMO1;U2AF2;CALM2;SPTAN1;GAPDH;SPTBN1;SPTBN2
Sendai virus infection C1319860 mouse GSE10211 sample 82	14/292	0.108027	0.460076	0	0	1.44631	3.21858	ZMYND8;CTR9;NEDD4L;ZBTB20;H2AFV;PTPRF;ACTG1;NCOR2;SPSB1;RPS6KA2;NRIP1;SPTAN1;OGT;SPTBN1
endometriosis DOID-289 human GSE6364 sample 945	15/318	0.109274	0.463035	0	0	1.42292	3.1502	LGALS3BP;ERRFI1;ACTN4;PLOD1;EEF2;ACTB;ACTG1;COX2;FLNA;MALAT1;P4HB;SLIRP;AGRN;GAPDH;MGLL
Huntington's disease DOID-12858 human GSE24250 sample 671	14/293	0.110206	0.464638	0	0	1.44137	3.17881	SETD5;SLC38A1;SDHA;EEF2;LITAF;EEF1A1;RPS14;FAM111A;FAM102A;DHX15;ANP32B;UBA52;CALM2;VCL
cellular phase chronic idiopathic myelofibrosis 8106 human GSE3410 sample 460	11/218	0.110552	0.463766	0	0	1.52213	3.35215	TOP2A;AKAP12;EEF1A1;AIM1;HMGB2;IRS2;SNRPF;P4HB;CALM2;GAPDH;ACTB
atopic dermatitis DOID-3310 human GSE26952 sample 981	15/319	0.111373	0.464887	0	0	1.41846	3.11333	BCAR3;ABCC3;SLC38A1;FNBP1;ASAP2;PTPRF;ABTB2;SCEL;ZNF618;TRIB3;CHAC1;SPTAN1;MGLL;SNTB1;MAP3K5
hepatitis C DOID-1883 human GSE20948 sample 601	14/294	0.112411	0.466895	0	0	1.43647	3.13955	TOP2A;MGST3;ACTN4;EEF2;KTN1;LIPC;COX2;COX1;KIF20A;SNRPF;P4HB;UBA52;GAPDH;SKP1
Epilepsy DOID-1826 rat GSE2880 sample 804	18/397	0.112615	0.465438	0	0	1.36772	2.98681	ATP6V1A;APP;WSCD1;PODXL2;PLLP;IQSEC1;SLC2A1;UQCR11;SLC7A11;EEF2;LITAF;ACTB;ACTG1;OGDH;RPL35;COX2;P4HB;SPTAN1
Teratospermia UMLS CUI-C0919628 human GSE6872 sample 953	17/372	0.114484	0.470842	0	0	1.37855	2.98776	C2ORF88;HUWE1;EEF2;ACTB;EEF1A1;MORF4L1;COX3;DHX15;RPL35;COX2;COX1;MALAT1;SLIRP;OR7E47P;UBA52;CALM2;ND4
Pauciarticular juvenile arthritis C0157917 human GSE1402 sample 430	13/270	0.115474	0.472599	0	0	1.45243	3.13538	SPON1;HSF2BP;RASAL2;PRSS23;GALE;SALL1;ASPH;KCNQ1;RAB11FIP3;MYH10;MEGF9;KPNA1;DUXAP10
cervical cancer DOID-4362 human GSE9750 sample 617	14/296	0.116899	0.476106	0	0	1.42677	3.06248	ANXA1;MGST3;EMP1;UQCR11;LTBP2;PPL;ACTB;RPS14;SCEL;RPL35;FLNA;CD9;CALM2;EPHA2
Sepsis C0243026 rat GSE1781 sample 314	17/374	0.118497	0.480285	0	0	1.37118	2.92454	APP;PIGR;CLUH;HDLBP;SDHA;EEF2;LITAF;ACTB;ACTG1;EEF1A1;HADHA;LIPC;CAPZB;U2AF2;PLXNB2;CYTB;SPTAN1
Down syndrome DOID-14250 human GSE42956 sample 1060	12/247	0.120941	0.487832	0	0	1.46555	3.09591	CA12;CDH6;SCARA3;VCAN;AIM1;ZNF608;LURAP1L;NFIB;TNC;PPL;ST6GALNAC5;MAP3K5
NASH C0400966 human GSE24807 sample 185	15/325	0.124473	0.49968	0	0	1.39227	2.90103	MACF1;HSPA4;ITGA3;NXN;ARHGEF16;SARS;SDHA;EEF2;CANX;RPL35;SNRPF;SLIRP;SPTAN1;MET;PHACTR4
Essential Thrombocytemia C0040028 human GSE2006 sample 434	9/174	0.125234	0.500338	0	0	1.56031	3.24165	EEF1A1;RNF11;LIPC;GNAQ;UBA52;USF2;VCL;MGLL;SKP1
HIV encephalitis C0276548 human GSE3489 sample 2	12/249	0.126112	0.501458	0	0	1.45378	3.01018	EEF1A1;FTO;ATP6V1A;APP;CTIF;SARS;EEF2;PPL;CALM2;GAPDH;ACTB;SKP1
melanoma in situ UMLS CUI-C0346040 human GSE4587 sample 980	18/404	0.12638	0.500155	0	0	1.34403	2.78006	CA12;ANXA1;MYOF;EMP1;ADIRF;NEAT1;EEF2;PPL;PTPRF;KTN1;MORF4L1;SCEL;VCAN;AIM1;COX3;PLS3;AP3S1;ANP32B
astrocytoma DOID-3069 human GSE15824 sample 860	14/301	0.12857	0.506433	0	0	1.40307	2.87808	APP;FNBP1;PLLP;COBL;NEAT1;PTPRD;ANLN;FMNL2;DMXL1;COX2;PLS3;ANP32B;CALM2;ND4
endometrial cancer DOID-1380 human GSE17025 sample 841	15/328	0.131345	0.514945	0	0	1.37954	2.80037	ERRFI1;IRS1;NXN;ACTG1;EEF1A1;RPS14;MORF4L1;SLK;SLTM;DMXL1;ALDH1A2;RPL35;SEC62;OGT;SKP1
Ulcerative Colitis C0009324 human GSE3365 sample 188	15/328	0.131345	0.51255	0	0	1.37954	2.80037	SETD5;MGEA5;SLC38A1;ANXA1;TNFAIP2;IRS2;ACTB;EEF1A1;SLTM;ZC3H11A;POLE3;DHX15;RPL35;ANP32B;EZR
nemaline myopathy DOID-3191 mouse GSE3384 sample 974	7/128	0.133377	0.51807	0	0	1.6497	3.32345	INPP4A;SVIL;PLEKHB2;PPTC7;UBE2B;UQCR11;GAPDH
ductal carcinoma in situ DOID-0060074 human GSE21422 sample 605	14/303	0.133418	0.515842	0	0	1.3938	2.8075	PIGR;ANXA1;CRIM1;ADIRF;EMP1;IRS2;EEF2;PPL;TGFBR2;EEF1A1;NFIB;RPL35;UBA52;MGLL
Muscular Dystrophy C0026850 mouse GSE2507 sample 232	15/329	0.133683	0.514494	0	0	1.37535	2.76759	FTO;B4GALT1;PLEKHB2;MGST3;SGTA;DYRK1A;UQCR11;SDHA;EEF2;ACTB;EEF1A1;MORF4L1;CAPZB;UBTF;GAPDH
endometriosis of ovary DOID-11432 human GSE7305 sample 939	13/279	0.13787	0.528189	0	0	1.40558	2.78507	PIGR;NXN;HMGB2;ACTB;ACTG1;EEF1A1;VCAN;ALDH1A2;COX2;COX1;GAPDH;LIMS1;ND4
Polymyositis C0085655 human GSE3112 sample 227	13/279	0.13787	0.525788	0	0	1.40558	2.78507	SVIL;USP25;UBE2B;MGST3;UQCR11;DEK;PPP2R3A;EEF2;KTN1;NDUFV2;GAPDH;MMADHC;PTPN3
MDS - Myelodysplastic syndrome C0026986 human GSE4619 sample 206	14/305	0.138367	0.525295	0	0	1.38466	2.73865	ANXA1;UHRF1;HMGB2;PLAUR;DEK;EREG;AKAP12;EEF1A1;RPS14;COX3;RPL35;CD9;EZR;SKP1
GERD - Gastro-esophageal reflux disease C0017168 human GSE2144 sample 27	12/254	0.139571	0.527477	0	0	1.42516	2.8064	EEF1A1;APP;FAM111A;SETD5;HUWE1;UQCR11;ACTN4;SLIRP;SDHA;TNS3;NR2F6;TGFBR2
Dermatomyositis C0011633 human GSE5370 sample 334	13/280	0.140497	0.528597	0	0	1.40056	2.7487	SVIL;RNF11;MGST3;UQCR11;EEF2;ACTB;KTN1;EEF1A1;RPS14;OGDH;RPL35;NDUFV2;PTPN3
Chronic Lymphocytic Leukemia (Chronic B-lymphocytic leukemia) UMLS CUI-C0023434 human GSE26725 sample 745	16/359	0.142788	0.534817	0	0	1.34444	2.61682	CMTM7;ANXA1;GCNT1;ITGB2;ITGB2-AS1;C12ORF75;CCDC102A;CLIP2;VCAN;ZNF608;ZNF618;COBLL1;GNG7;DOK7;NRIP1;MACROD2
Alcohol poisoning C0392620 rat GSE3311 sample 288	15/333	0.143267	0.534227	0	0	1.35882	2.64026	TRABD;APP;HDLBP;EEF2;EEF1A1;RPS14;MORF4L1;U2AF2;FAM120A;TSPAN4;ANP32B;CYTB;P4HB;UBA52;MMADHC
breast cancer DOID-1612 human GSE9574 sample 448	12/256	0.145164	0.538905	0	0	1.41403	2.72892	EEF1A1;APP;MORF4L1;ANXA1;TRPS1;CANX;MIR21;FAM3C;EEF2;CALM2;GAPDH;NFE2L2
systemic lupus erythematosus DOID-9074 human GSE55447 sample 1076	15/334	0.145721	0.538591	0	0	1.35476	2.60934	ERRFI1;SMAD3;ZFHX2;PPTC7;SLC2A1;PTPRJ;SLC7A11;SIPA1L3;FAM160A1;STAG1;ITCH;KCNQ1OT1;NF1;FLNB;SRGAP1
Sjogren's syndrome DOID-12894 human GSE23117 sample 889	14/308	0.14598	0.537179	0	0	1.37118	2.63854	LGALS3BP;APP;PIGR;EEF2;PRSS23;SCNN1A;COX3;RPL35;SH3BP4;CD9;P4HB;KIAA0319L;GAPDH;MGLL
Type 2 diabetes mellitus C0011860 mouse GSE2899 sample 279	14/308	0.14598	0.534833	0	0	1.37118	2.63854	MBD3;ATP6V1A;ABCC3;PLEKHB2;EMP1;TUBG1;BAIAP2;HSPG2;ACTG1;NCOR2;ITCH;GON4L;AP3S1;CALM2
Spinal Muscular Atrophy C0026847 mouse GSE10599 sample 235	11/232	0.149831	0.546558	0	0	1.43028	2.71502	CA12;AIM1;UHRF1;GCNT1;EMP1;HNF1B;CLDN16;MKI67;TINAG;MET;TGM2
Setleis syndrome C1744559 human GSE16524 sample 285	10/207	0.151162	0.549024	0	0	1.45729	2.75341	CA12;EEF1A1;HUWE1;COX2;CALM2;GAPDH;MMADHC;ACTG1;RAI14;ND4
schizophrenia DOID-5419 human GSE25673 sample 892	15/337	0.153221	0.554105	0	0	1.3427	2.51873	ERRFI1;SPON1;SCARA3;B4GALT1;ITGA3;CTDSPL;PRKCA;VLDLR;KALRN;TRHDE;SALL1;DUSP10;FMNL2;PDGFC;PTPN3
anemia DOID-2355 human GSE4619 sample 792	14/311	0.153814	0.553864	0	0	1.35795	2.5421	ANXA1;UHRF1;HMGB2;PLAUR;NEAT1;KTN1;ACTG1;EEF1A1;GNA13;RPS14;NRIP1;CD9;COX1;MALAT1
chronic lymphocytic leukemia DOID-1040 human GSE6691 sample 786	13/285	0.154034	0.552286	0	0	1.37599	2.5739	OSBPL9;MACF1;C11ORF95;ANXA1;SMAD3;IQSEC1;GCNT1;ITGB2;RHBDF2;ZMIZ1;GNG7;NRIP1;TNS3
amyotrophic lateral sclerosis DOID-332 human GSE833 sample 1007	9/184	0.158816	0.567005	0	0	1.47551	2.71495	EEF1A1;APP;HAS3;MAP4;PCDH1;EVPL;CALM2;GAPDH;ACTB
systemic lupus erythematosus DOID-9074 human GSE10325 sample 691	10/210	0.161048	0.572538	0	0	1.43647	2.62308	EEF1A1;RPS14;DDX46;RPL35;SARS;EEF2;UBA52;CALM2;VCL;ACTG1
nemaline myopathy DOID-3191 mouse GSE3384 sample 970	10/210	0.161048	0.570123	0	0	1.43647	2.62308	INPP4A;MBD3;PIGR;B4GALT1;UBE2B;ITSN1;OGDH;GAPDH;ACTB;ACTG1
Bipolar Disorder C0005586 human GSE7036 sample 181	13/288	0.162474	0.572756	0	0	1.36166	2.47445	MIR21;NEAT1;ACTB;EEF1A1;NCL;COX3;COX2;ANP32B;MACROD2;SNRPF;SLIRP;GAPDH;ND4
Retinitis Pigmentosa C0035334 mouse GSE128 sample 33	12/262	0.162641	0.570945	0	0	1.38164	2.50936	FTO;CMTM7;MORF4L1;SNRK;PLEKHB2;RPS6KA2;OGDH;EEF2;GAPDH;USF2;EPN1;ACTG1
Endometriosis C0014175 human GSE6364 sample 393	15/341	0.163536	0.571696	0	0	1.32695	2.40273	ATP6V1A;LGALS3BP;APP;ERRFI1;NEAT1;EEF2;ACTB;ACTG1;EEF1A1;VCAN;FLNA;CD9;MALAT1;P4HB;GAPDH
prostate cancer DOID-10283 human GSE3325 sample 991	14/315	0.1646	0.573028	0	0	1.34071	2.41895	OSBPL9;LIMCH1;HUWE1;ADIRF;MIR21;ACTB;RPS14;AIM1;DMXL1;PDGFC;FLNA;CD9;MMADHC;VCL
rheumatoid arthritis DOID-7148 human GSE10500 sample 779	16/368	0.164744	0.571158	0	0	1.31156	2.36522	ITGB2;TNFAIP2;UQCR11;EEF2;USF2;HADHA;LASP1;CAPZB;TNIP1;NCL;TSPAN4;FLNA;PLXNB2;CD9;CALM2;PLEC
Uterine leiomyoma C0042133 human GSE2725 sample 399	15/342	0.166171	0.573733	0	0	1.32307	2.37456	FTO;ANXA1;LIMCH1;ADIRF;LTBP2;GRAMD3;LITAF;ALCAM;ALDH1A2;CD9;ANP32B;TNS3;CALM2;MYH10;MGLL
Alzheimer's disease DOID-10652 human GSE4757 sample 592	16/369	0.167288	0.575224	0	0	1.30801	2.33877	MACF1;IRS2;PPL;ACTB;PTPRF;ACTG1;EEF1A1;MORF4L1;LASP1;SLK;FMNL2;TRPS1;COX2;MALAT1;CALM2;MYH10
multiple sclerosis DOID-2377 human GSE38010 sample 737	13/290	0.16823	0.576101	0	0	1.35227	2.41031	LGALS3BP;PLLP;HUWE1;NEAT1;LITAF;ACTB;ACTG1;EEF1A1;ANLN;CD9;ANP32B;UBA52;GAPDH
prostate cancer DOID-10283 human GSE26910 sample 603	13/290	0.16823	0.573759	0	0	1.35227	2.41031	SPON1;LIMCH1;BDNF;C2ORF88;GLIS3;C12ORF75;TFPI;PPL;TRHDE;PCDHA1;THSD7A;OR7E47P;TRHDE-AS1
multiple sclerosis DOID-2377 human GSE38010 sample 738	13/291	0.171146	0.581341	0	0	1.34762	2.37887	LGALS3BP;PLLP;HUWE1;NEAT1;LITAF;ACTB;ACTG1;EEF1A1;ANLN;CD9;ANP32B;UBA52;GAPDH
Senescence C0001792 rat GSE3531 sample 167	13/292	0.174087	0.588946	0	0	1.343	2.34784	EIF5B;GDA;UQCR11;OXR1;CANX;RPL35;COX2;COX1;UBA52;RAB11FIP3;CALM2;SMIM12;PTPN3
Adenocarcinoma of lung C0152013 human GSE1987 sample 431	14/319	0.175765	0.592236	0	0	1.3239	2.30174	MACF1;SVIL;ANXA1;MGST3;CRIM1;ADIRF;LTBP2;LITAF;TGFBR2;HADHA;DLC1;SPOCK2;FLNA;TGM2
Polycystic Ovary Syndrome C0032460 human GSE6798 sample 292	13/294	0.180043	0.604224	0	0	1.33387	2.28699	OSBPL9;SLC38A1;NXN;DEK;C12ORF75;SDHA;ACTG1;RILPL1;MYO18A;RPL35;COX2;UBA52;PTPN3
nasopharynx carcinoma DOID-9261 human GSE13597 sample 808	11/242	0.181747	0.607512	0	0	1.37118	2.33805	EEF1A1;PIGR;NCL;HUWE1;FLNA;P4HB;NEAT1;CALM2;PRSS23;ACTB;ACTG1
Dehydration C0011175 rat GSE3131 sample 60	16/375	0.182974	0.609189	0	0	1.28708	2.18599	ITGB1;APP;PLLP;UQCR11;ARHGAP39;SDHA;EPN1;RPS14;HADHA;NCL;SPOCK2;CD9;CYTB;NDUFV2;UBA52;ND4
cystic fibrosis DOID-1485 human GSE15568 sample 833	14/322	0.184379	0.61144	0	0	1.31156	2.21753	MGST3;HUWE1;ADIRF;UQCR11;EEF2;KTN1;EEF1A1;RPS14;CEP170B;RPL35;AP3S1;UBA52;CALM2;VCL
Asthma, allergic C0155877 human GSE3004 sample 360	10/217	0.185298	0.612066	0	0	1.39013	2.34348	EEF1A1;LGALS3BP;RPS14;PIGR;HADHA;UQCR11;SRGAP3;EEF2;PRSS23;PTPRF
West Nile fever DOID-2366 human GSE30719 sample 874	4/68	0.188576	0.620454	0	0	1.77447	2.96025	DLEU1;UACA;KIF15;MEGF9
polycystic ovary syndrome DOID-11612 human GSE34526 sample 797	10/218	0.188891	0.619062	0	0	1.38376	2.30615	COX2;PLS3;COX1;IRS2;TFPI;CALM2;MMADHC;VCL;SKP1;ND4
Parkinson's disease DOID-14330 human GSE19587 sample 1080	8/167	0.191088	0.623825	0	0	1.44507	2.39163	EEF1A1;MORF4L1;MAP4;ANP32B;UBA52;CALM2;ACTB;ACTG1
endometrial cancer DOID-1380 human GSE17025 sample 846	13/298	0.192247	0.625175	0	0	1.31596	2.16999	ERRFI1;IRS1;NXN;HUWE1;ACTG1;EEF1A1;RPS14;MORF4L1;ALDH1A2;RPL35;MALAT1;SEC62;SKP1
Ventilator-associated lung injury C0340257 mouse GSE2411 sample 355	12/272	0.193983	0.628386	0	0	1.33085	2.18257	LGALS3BP;PIGR;SPOCK2;SCNN1A;CTDSPL;TMCC2;P4HB;EZR;NEAT1;EEF2;PCDH1;TGM2
Crohn's disease DOID-8778 human GSE1710 sample 992	19/461	0.195151	0.629739	0	0	1.24328	2.03149	PRKCH;ARRDC1;CRIM1;FAM208A;ARHGAP39;LTBP2;LITAF;SIPA1L3;INIP;MPP7;SKA2;DCBLD2;GOLGA4;STAG1;UBN2;DMXL1;TEAD1;FAM120AOS;LIMS1
Purpura, Idiopathic Thrombocytopenic C0043117 human GSE574 sample 358	4/69	0.195346	0.627951	0	0	1.74875	2.85568	EEF1A1;RPS14;B4GALT1;SPTAN1
Alzheimer's disease DOID-10652 human GSE36980 sample 522	13/299	0.195357	0.62559	0	0	1.31156	2.14168	CA12;KIRREL3;GDA;BDNF;NEDD4L;ARHGAP18;VLDLR;ARHGAP6;FAM160A1;MET;ST6GALNAC5;RAI14;PTPN3
MELAS - Mitochondrial myopathy, encephalopathy, lactic acidosis and stroke-like episodes C0162671 human GSE1462 sample 102	8/169	0.199524	0.636505	0	0	1.42797	2.30163	MGST3;RPL35;SLIRP;OR7E47P;CALM2;GAPDH;MMADHC;PTPN3
Breast Cancer DOID-1612 human GSE34925 sample 478	16/382	0.20216	0.642471	0	0	1.26349	2.01994	PRELID2;EHF;ARL3;SLC2A1;SHROOM3;VLDLR;SLC7A11;GRAMD3;MPP7;ARHGAP24;PLCB4;DUSP10;TNIP1;ALDH1A2;TRIB3;CHAC1
Hypoxia C0242184 mouse GSE3195 sample 70	14/328	0.202204	0.640187	0	0	1.28757	2.05815	EMP1;ELAVL1;ACTB;ACTG1;AKAP12;EEF1A1;RPS14;DHX15;RPL35;PLS3;CD9;ANP32B;UBA52;CALM2
Sendai virus infection C1319860 mouse GSE2935 sample 336	14/328	0.202204	0.63778	0	0	1.28757	2.05815	NRP1;ANXA1;NEK6;RRP1;EMP1;EEF2;ACTG1;MYO1E;SPSB1;ALCAM;RPS6KA2;TSPAN4;CD9;OGT
acute myocardial infarction DOID-9408 mouse GSE775 sample 1002	11/248	0.202303	0.6357	0	0	1.338	2.13812	MGEA5;GOLGA4;PPTC7;UBE2B;MGST3;OGDH;HDLBP;UQCR11;LMO7;NDUFV2;GAPDH
salivary gland adenoid cystic carcinoma DOID-4866 human GSE36820 sample 511	11/249	0.205824	0.644352	0	0	1.33263	2.10653	PIGR;EHF;ANXA1;LIMCH1;ADIRF;CD9;MALAT1;P4HB;SEC62;NEAT1;MMADHC
Duchenne muscular dystrophy (DMD) C0013264 mouse GSE1025 sample 144	12/276	0.207243	0.646382	0	0	1.31156	2.06422	PIGR;SVIL;PLEKHB2;PPTC7;UBE2B;RPS6KA2;MGST3;FAM120A;UQCR11;ACTB;SPTBN1;KPNA1
endometriosis DOID-289 human GSE6364 sample 946	16/384	0.207809	0.645748	0	0	1.25691	1.97478	ATP6V1A;ERRFI1;PIGR;EHF;C2ORF88;MIR21;NUP153;NEAT1;MORF4L1;ALCAM;PPP4R2;SCNN1A;SMS;CD9;MALAT1;CALM2
Hepatic Cirrhosis C0023890 rat GSE1843 sample 372	13/303	0.208026	0.644036	0	0	1.29425	2.03209	APP;MACF1;NRP1;PRKCH;GDA;GAB1;UACA;DLC1;TSPAN4;COX1;TMCC2;FLNB;NFE2L2
Breast cancer DOID-1612 mouse GSE24594 sample 616	15/358	0.211181	0.651399	0	0	1.26393	1.96547	ATP6V1A;PIGR;EMP1;MKI67;NEAT1;PPP4R2;DHX15;CD9;TRIB3;RBCK1;FAM3C;AGRN;GAPDH;TGM2;NFE2L2
Neurofibromatosis DOID-8712 mouse GSE1482 sample 669	13/305	0.214494	0.659195	0	0	1.28576	1.97939	ITGB1;PLEKHB2;UBE2B;BDNF;UQCR11;KALRN;ACTB;MORF4L1;NFIB;NCL;HIVEP2;TOP1;SPTAN1
asthma DOID-2841 human GSE18965 sample 753	16/389	0.222242	0.680516	0	0	1.24076	1.86608	MAP2K3;FTO;LGALS3BP;SUPT16H;IQSEC1;PNKP;PLAUR;PSEN1;EEF2;AATF;PRSS23;FAM102A;TNIP1;ABL1;ME3;TNS3
Viral cardiomyopathy C0264797 human GSE4172 sample 384	10/227	0.222572	0.679048	0	0	1.32889	1.99667	RPS14;CRIM1;RPL35;COX2;UQCR11;UBA52;GAPDH;KTN1;MAP3K5;ND4
facioscapulohumeral muscular dystrophy DOID-11727 human GSE15090 sample 540	10/228	0.226454	0.688388	0	0	1.32307	1.96503	PPTC7;NRIP1;MYO18A;COX2;SLIRP;C12ORF75;EEF2;UBA52;KTN1;ND4
ulcerative colitis DOID-8577 human GSE11223 sample 588	14/336	0.227132	0.687957	0	0	1.25691	1.86303	PIGR;EHF;PPP1R12A;ITGA3;FHIT;ACTB;NR2F6;FAM129B;EDAR;SCNN1A;ZC3H18;PLXNB2;ZNF205;LGR4
ALS (Amyotrophic Lateral Sclerosis) C0002736 human GSE833 sample 283	11/255	0.227489	0.686558	0	0	1.30127	1.92674	EEF1A1;APP;KIAA0513;NCL;HAS3;MAP4;EEF2;CALM2;ACTB;MGLL;ACTG1
ulcerative colitis DOID-8577 human GSE11223 sample 585	11/255	0.227489	0.684098	0	0	1.30127	1.92674	MBD3;U2AF2;ZNHIT6;SETD1A;DCDC2;MKI67;TNS4;BRCA2;METTL21A;PDE9A;EPHA2
Kidney disorder associated with type 2 diabetes mellitus C1720457 mouse GSE2557 sample 8	12/282	0.227843	0.682715	0	0	1.28366	1.89865	EEF1A1;APP;ABCC4;NCL;CANX;LONP1;HDLBP;TRIB3;CHAC1;P4HB;NEAT1;PARL
Huntington's disease DOID-12858 mouse GSE3248 sample 723	14/337	0.230336	0.687729	0	0	1.25318	1.83994	APP;MACF1;SVIL;USP25;PLEKHB2;SGTA;ACTB;EPN1;ACTG1;THRAP3;U2AF2;SPOCK2;CD9;SPTBN2
Systemic lupus erythematosus (SLE) C0024141 human GSE12374 sample 123	11/256	0.231185	0.687817	0	0	1.29619	1.89832	CDH6;RSPH3;AIM1;ZNF608;PPP1R12A;MAST4;PLS3;ARHGAP18;MACROD2;CCDC102A;TRIOBP
lung cancer DOID-1324 mouse GSE14277 sample 615	15/365	0.23244	0.689105	0	0	1.2397	1.80887	MACF1;NRP1;LIMCH1;FNBP1L;AKAP12;SCEL;SNRK;DLC1;TMCC2;TNS3;SPTAN1;MYH10;SPTBN1;VCL;TGM2
nicotine dependence DOID-0050742 human GSE6264 sample 582	10/230	0.234296	0.692163	0	0	1.31156	1.9033	CAPZB;SUMO1;HMGB2;ZBTB20;H2AFV;ANP32B;CALM2;GAPDH;ACTB;ACTG1
Oligodendroglioma C0028945 human GSE2223 sample 116	13/311	0.234401	0.690044	0	0	1.26095	1.82929	PLLP;DCDC2;LMO7;PPL;OSBPL10;ANLN;MYO1E;NCEH1;SPOCK2;NRIP1;PLS3;EPHB2;SPTBN1
pancreatic intraductal papillary-mucinous adenoma DOID-7851 human GSE19650 sample 608	12/284	0.234887	0.689058	0	0	1.27462	1.84647	ITGB1;ERRFI1;MORF4L1;VCAN;PDGFC;CRIM1;RPL35;EMP1;PLS3;ANP32B;PRSS23;MYH10
thymic carcinoma DOID-3284 mouse GSE2501 sample 985	14/339	0.236798	0.692243	0	0	1.24579	1.79462	TOP2A;MGEA5;PPTC7;ITGB2;EMP1;H2AFV;ELAVL1;ACTB;ACTG1;EEF1A1;ANP32E;ANP32B;TOP1;EZR
amyotrophic lateral sclerosis DOID-332 human GSE833 sample 1006	11/259	0.242411	0.706192	0	0	1.28118	1.81558	EEF1A1;APP;KIAA0513;NCL;HAS3;MAP4;EEF2;CALM2;ACTB;MGLL;ACTG1
osteoarthritis DOID-8398 human GSE16464 sample 752	9/206	0.245548	0.712854	0	0	1.31793	1.85072	AKAP12;CA12;EEF1A1;RPS6KA2;COX1;MALAT1;NEAT1;EEF2;GAPDH
HIV - Human immunodeficiency virus infection C0019693 human GSE6740 sample 419	11/260	0.246198	0.712276	0	0	1.27625	1.78882	RPS14;SNRK;PRKCH;NRIP1;RPL35;IRS2;SNRPF;EEF2;UBA52;LITAF;TGFBR2
colorectal adenocarcinoma DOID-0050861 human GSE24514 sample 595	14/342	0.246626	0.711064	0	0	1.23486	1.72866	SVIL;SPON1;MGST3;ADIRF;GRAMD3;TRIOBP;AKAP12;SCNN1A;OGDH;ANO10;FLNA;MGLL;MAD1L1;PDE9A
Nutritional deficiency, NEC C0267975 mouse GSE1776 sample 422	15/370	0.248145	0.712993	0	0	1.22294	1.70446	ANXA1;B4GALT1;TNC;UQCR11;ACTB;FAM129B;ACTG1;TGFBR2;NCOR2;MYO18A;FLNA;PLXNB2;CD9;AP3S1;VCL
cerebral palsy DOID-1969 human GSE31243 sample 878	12/288	0.249225	0.713652	0	0	1.25691	1.74635	HSPA9;IRS1;NRIP1;OGDH;NUCKS1;SLIRP;NDUFV2;EEF2;PRSS23;TEAD1;GAPDH;KTN1
glioblastoma UMLS CUI-C0017636 human GSE15824 sample 863	13/316	0.25153	0.717802	0	0	1.241	1.71282	APP;FNBP1;LIMCH1;PLLP;COBL;PTPRD;ANLN;ALCAM;FMNL2;COX1;MAP4;ANP32B;ND4
Sepsis C0243026 mouse GSE4479 sample 150	13/316	0.25153	0.715369	0	0	1.241	1.71282	ATF7IP;MACF1;HSPA4;ITGB2;DEK;ACTB;ACTG1;EEF1A1;PPP4R2;DMXL1;DHX15;FLNA;SPTAN1
adrenoleukodystrophy DOID-10588 human GSE34308 sample 709	10/235	0.254328	0.720882	0	0	1.28366	1.75749	LGALS3BP;SVIL;PLCB4;RABGAP1;ITGA3;TNFAIP2;ADIRF;C12ORF75;PPL;ST6GALNAC5
Burn C0006434 rat GSE802 sample 97	13/317	0.255011	0.720384	0	0	1.23709	1.69042	PIGR;MGST3;CBX1;UQCR11;ACTB;RPS14;COX1;RBCK1;CYTB;NDUFV2;UBA52;GAPDH;ND5
Dehydration C0011175 rat GSE3110 sample 443	11/263	0.257684	0.725492	0	0	1.26169	1.71088	EEF1A1;RPS14;SPON1;ALCAM;ALDH1A2;RPL35;ANKRD10;UQCR11;SLC7A11;CIC;SKP1
skin squamous cell carcinoma DOID-3151 human GSE2503 sample 627	15/373	0.257762	0.723285	0	0	1.21311	1.64463	MGST3;HUWE1;UQCR11;EEF2;EEF1A1;RPS14;SCEL;MORF4L1;ALCAM;RPL35;NDUFV2;UBA52;CALM2;SKP1;NFE2L2
systemic lupus erythematosus DOID-9074 human GSE55447 sample 1072	13/318	0.258509	0.722964	0	0	1.2332	1.6683	SEMA6A;NEK6;H2AFV;KCNJ16;MLLT3;SIPA1L3;VCAN;UBN2;HAS3;RHPN1;TOP1;SRGAP1;SPTBN2
Anterior Horn Cell Disease C0154681 human GSE1481 sample 208	14/346	0.259969	0.72463	0	0	1.22059	1.64437	SETD5;PLLP;HUWE1;KCNJ16;EEF2;KTN1;AKAP12;EEF1A1;NCL;CEP170B;CD9;ANP32B;TNS3;GAPDH
schizophrenia DOID-5419 human GSE17612 sample 853	12/291	0.260184	0.72283	0	0	1.24396	1.67482	LASP1;COX2;MICAL2;SLC39A10;CD9;SLC7A11;NEAT1;UBA52;CALM2;ACTB;ACTG1;ND4
Muscular Dystrophy C0026850 mouse GSE2629 sample 18	12/291	0.260184	0.720444	0	0	1.24396	1.67482	MAP2K3;HSPA9;MORF4L1;PPTC7;MGST3;NCL;OGDH;DYRK1A;LMO7;NDUFV2;GAPDH;KPNA1
Thrombocytopenia C0040034 mouse GSE2527 sample 253	15/374	0.260998	0.72032	0	0	1.20986	1.62514	ATP6V1A;LGALS3BP;RNF11;ANXA1;B4GALT1;GDA;GCNT1;ITGB2;ASAP1;ACTN4;ACTG1;CAPZB;FLNA;TMCC2;P4HB
acute myocardial infarction DOID-9408 mouse GSE775 sample 1001	12/292	0.263874	0.72587	0	0	1.2397	1.65162	EEF1A1;SPSB1;SNRK;LIMCH1;MGST3;SGTA;OGDH;UQCR11;NDUFV2;EEF2;GAPDH;EPN1
Osteolysis C0029435 human GSE755 sample 128	12/293	0.267582	0.733664	0	0	1.23546	1.62875	EEF1A1;TNIP1;FNBP1;IQSEC1;MGST3;GNG7;TNFAIP2;RPL35;AP3S1;EZR;LITAF;CD2AP
endometrial cancer DOID-1380 human GSE17025 sample 849	13/322	0.272669	0.745178	0	0	1.21788	1.58263	ERRFI1;PIGR;EHF;IRS1;NXN;EEF2;EEF1A1;RPS14;MORF4L1;SLTM;ALDH1A2;RPL35;SKP1
Muscular Dystrophy C0026850 mouse GSE2507 sample 405	13/322	0.272669	0.742758	0	0	1.21788	1.58263	FTO;SVIL;RNF11;PLEKHB2;UBE2B;HDLBP;DYRK1A;EEF2;ACTB;RPS6KA2;FAM120A;SLIRP;KPNA1
endometrial cancer DOID-1380 human GSE17025 sample 843	12/295	0.275049	0.746815	0	0	1.22709	1.58393	EEF1A1;ERRFI1;RPS14;MORF4L1;SLTM;IRS1;HUWE1;RPL35;MALAT1;SEC62;OGT;SKP1
Duchenne muscular dystrophy (DMD) C0013264 mouse GSE466 sample 328	11/268	0.277219	0.75028	0	0	1.23815	1.58848	SVIL;GOLGA4;RNF11;PPTC7;UBE2B;RPS6KA2;MGST3;OGDH;UQCR11;GAPDH;PLEC
Sarcoidosis C0036202 human GSE2657 sample 12	8/187	0.281338	0.75898	0	0	1.29052	1.63663	EEF1A1;RPS14;PLOD1;JADE2;SPTAN1;ACTB;ACTG1;PLEC
psoriasis DOID-8893 human GSE52471 sample 690	12/297	0.282582	0.759892	0	0	1.21882	1.54033	BCAR3;C11ORF95;ALCAM;PLCB4;ABLIM3;PLLP;ALDH1A2;NEDD4L;COBL;JADE2;SPTAN1;RAI14
Schizophrenia C0036341 human GSE12649 sample 261	10/242	0.283287	0.759353	0	0	1.24653	1.57224	AKAP12;CANX;DHX15;HUWE1;SARS;HIVEP2;TNS3;UBA52;GAPDH;MGLL
tuberculosis DOID-399 human GSE54992 sample 564	13/325	0.283455	0.757386	0	0	1.20664	1.52121	BCAR3;SLC7A11;TFPI;EREG;AKAP12;DUSP10;ALDH1A2;IL3RA;FLNB;CHAC1;MAMLD1;MET;RAI14
Nemaline Myopathy C0206157 mouse GSE3384 sample 317	6/134	0.285241	0.759738	0	0	1.35071	1.69436	INPP4A;MBD3;PIGR;OGDH;GAPDH;ACTG1
systemic lupus erythematosus DOID-9074 human GSE13887 sample 450	10/243	0.2875	0.763332	0	0	1.2414	1.54744	EEF1A1;FAM102A;NCL;CTR9;HUWE1;RPL35;NDUFV2;EEF2;ND4;TGFBR2
allergic asthma DOID-9415 human GSE41649 sample 716	11/271	0.289154	0.765301	0	0	1.22445	1.51929	AKAP12;PIGR;SLC38A1;PDGFC;ITGB2;ASXL2;ZBTB20;IRS2;LTBP2;SEC62;MYH10
Duchenne muscular dystrophy (DMD) C0013264 mouse GSE1472 sample 410	11/271	0.289154	0.762895	0	0	1.22445	1.51929	EEF1A1;SVIL;CDC34;UBE2B;RPS6KA2;MGST3;HDLBP;UQCR11;SDHA;NDUFV2;EPN1
Breast Cancer C0006142 human GSE1378 sample 52	12/299	0.290178	0.763195	0	0	1.21067	1.49792	AKAP12;BCAR3;SEMA6A;GCNT1;GLIS3;HMGB2;NHS;SLC7A11;TNS4;LYPD6;ARHGAP6;DCBLD2
astrocytoma DOID-3069 human GSE15824 sample 861	12/299	0.290178	0.76081	0	0	1.21067	1.49792	PTPRD;APP;ANLN;ALCAM;FMNL2;FNBP1;PLLP;DMXL1;MAP4;ANP32B;SEC62;CALM2
multiple sclerosis DOID-2377 human GSE21942 sample 743	12/299	0.290178	0.75844	0	0	1.21067	1.49792	EEF1A1;MORF4L1;RNF11;VCAN;ITGB2;COX2;COX1;UBA52;CALM2;GAPDH;ACTB;ACTG1
acute myocardial infarction DOID-9408 mouse GSE775 sample 1004	12/299	0.290178	0.756084	0	0	1.21067	1.49792	HSPA9;RNF11;PLEKHB2;PPTC7;UBE2B;MGST3;OGDH;UQCR11;LMO7;SLIRP;SDHA;NDUFV2
systemic lupus erythematosus DOID-9074 human GSE55447 sample 1079	13/327	0.29072	0.755151	0	0	1.19926	1.48156	PPP1R12A;ZNF282;NEK6;TBCD;UQCR11;ACTN4;KTN1;SIN3A;RHPN1;FAM192A;PHIP;TOP1;MAP3K5
Nicotine addiction C0028043 human GSE11208 sample 325	19/497	0.294191	0.761808	0	0	1.15322	1.411	TOP2A;LGALS3BP;APP;UHRF1;CTR9;CBX1;HMGB2;NUCKS1;ASAP2;KTN1;MORF4L1;NCL;COX3;SMS;SNRPF;KIF20A;ANP32B;MYH10;MMADHC
Eczema C0013595 human GSE6012 sample 268	7/163	0.296862	0.766361	0	0	1.29547	1.57333	EEF1A1;RPS14;RXRA;MGST3;HUWE1;RPL35;ADIRF
endometrial cancer DOID-1380 human GSE17025 sample 848	11/273	0.297192	0.764859	0	0	1.21548	1.47483	ERRFI1;PIGR;SLTM;IRS1;ALDH1A2;RPL35;PLS3;MALAT1;AP3S1;SEC62;EEF2
endometrial cancer DOID-1380 human GSE17025 sample 845	11/273	0.297192	0.76252	0	0	1.21548	1.47483	EEF1A1;ERRFI1;RPS14;MORF4L1;IRS1;ALDH1A2;RPL35;MALAT1;SEC62;OGT;SKP1
ulcerative colitis DOID-8577 human GSE3365 sample 762	13/329	0.298039	0.762362	0	0	1.19197	1.44291	SETD5;MGEA5;SLC38A1;ANXA1;TNFAIP2;IRS2;ACTB;EEF1A1;SLTM;ZC3H11A;DHX15;RPL35;EZR
schizophrenia DOID-5419 human GSE25673 sample 891	11/274	0.301233	0.768191	0	0	1.21104	1.45309	ABCC3;SPON1;SCARA3;KCNIP1;ITGA3;TNC;KCNJ16;PRKCA;STK32A;LYPD6;EGFR
colon adenoma DOID-0050912 human GSE4183 sample 550	11/274	0.301233	0.765863	0	0	1.21104	1.45309	CA12;PIGR;LASP1;C2ORF88;COX3;COX2;EMP1;MALAT1;ACTB;ACTG1;ND4
cerebral palsy DOID-1969 human GSE11686 sample 912	9/219	0.303069	0.768203	0	0	1.2397	1.47994	HADHA;OGDH;HUWE1;UQCR11;SDHA;NDUFV2;UBA52;GAPDH;MGLL
Down syndrome DOID-14250 human GSE16677 sample 1064	9/219	0.303069	0.765889	0	0	1.2397	1.47994	RNF11;PLEKHB2;NRIP1;DHX15;RARA;PHIP;VCL;ACTG1;PHACTR4
endometrial cancer DOID-1380 human GSE17025 sample 844	13/331	0.305411	0.769488	0	0	1.18476	1.40525	ERRFI1;RNF11;IRS1;EEF1A1;RPS14;MORF4L1;DMXL1;ALDH1A2;RPL35;AP3S1;SEC62;OGT;SKP1
Teratospermia UMLS CUI-C0919628 human GSE6968 sample 954	11/276	0.309359	0.777103	0	0	1.20226	1.41056	MUS81;ABCC3;WSCD1;MAST4;HDLBP;AP3S1;UBA52;OXR1;ACTB;SKP1;NDEL1
type 2 diabetes mellitus DOID-9352 mouse GSE54917 sample 614	12/304	0.309419	0.774932	0	0	1.19076	1.39683	ABTB2;AKAP12;ATP6V1A;MUS81;LGALS3BP;TANGO6;IRS1;EMP1;PLS3;GRAMD3;ACTG1;PTPN3
nemaline myopathy DOID-3191 mouse GSE3384 sample 977	9/221	0.312204	0.779582	0	0	1.22848	1.43007	SVIL;MORF4L1;UBE2B;ARL3;SGTA;GAPDH;ACTB;SPTBN1;PLEC
systemic lupus erythematosus DOID-9074 human GSE55447 sample 1075	13/333	0.312832	0.77883	0	0	1.17765	1.36853	PPP1R12A;RDX;HUWE1;H2AFV;PRSS23;EREG;RSPH3;VCAN;TMEM248;COBLL1;CDK12;PCDHA9;RNF111
Breast Cancer C0006142 human GSE2155 sample 39	10/250	0.317452	0.787995	0	0	1.20664	1.38453	LGALS3BP;ANLN;EHF;SMARCC1;ARVCF;CENPF;FAM102A;DEK;MKI67;NDUFV2
Leukemia, Adult T Cell C0023493 human GSE10789 sample 351	13/335	0.320298	0.792715	0	0	1.17062	1.33275	OSER1;RDX;CTDSPL;VLDLR;ELAVL1;CD2AP;GNA13;ANLN;GOLGA4;ERF;TRIB3;PCDHA9;NDEL1
Squamous cell carcinoma of lung C0149782 human GSE3268 sample 441	13/335	0.320298	0.790384	0	0	1.17062	1.33275	DOCK4;LIMCH1;CRIM1;ADIRF;COBL;SYNE1;TGFBR2;AKAP12;SCEL;SLK;RPS6KA2;SPOCK2;TSPAN4
diffuse large B-cell lymphoma DOID-0050745 mouse GSE6136 sample 688	13/337	0.327808	0.806543	0	0	1.16367	1.29787	HSPA9;BCAR3;HSPA4;DEK;ACTG1;MORF4L1;NCL;ANP32E;DHX15;ANP32B;TOP1;UBA52;GAPDH
diffuse large B-cell lymphoma DOID-0050745 mouse GSE6136 sample 687	14/366	0.330078	0.809753	0	0	1.15389	1.279	TOP2A;BCAR3;HSPA4;UHRF1;HMGB2;EEF2;ACTG1;MORF4L1;SUMO1;NCL;ANP32E;DHX15;ANP32B;GAPDH
LGLL - Large granular lymphocytic leukemia C1522378 human GSE10631 sample 47	9/225	0.330647	0.808783	0	0	1.20664	1.33539	TOP2A;RPS14;VCAN;SPOCK2;IRS2;ANP32B;EEF2;GAPDH;NDEL1
endometrial cancer DOID-1380 human GSE17025 sample 838	11/282	0.334042	0.814712	0	0	1.17668	1.29022	EEF1A1;ERRFI1;RPS14;MORF4L1;IRS1;ALDH1A2;RPL35;MALAT1;ANP32B;SEC62;OGT
autism spectrum disorder DOID-0060041 human GSE25507 sample 1028	13/339	0.335358	0.815551	0	0	1.1568	1.26388	ANXA1;ITGB2;ITGB2-AS1;TNFAIP2;ACTN4;EEF2;ACTB;VCAN;TNIP1;RPL35;FLNA;PLXNB2;GAPDH
autism spectrum disorder DOID-0060041 human GSE28521 sample 1041	11/283	0.338194	0.820073	0	0	1.17253	1.27118	KIAA0513;CTIF;SUPT16H;ABLIM2;IQSEC1;PLLP;CBS;COBLL1;SPOCK2;RARA;NMNAT2
diffuse large B-cell lymphoma DOID-0050745 mouse GSE6136 sample 686	15/397	0.338945	0.819524	0	0	1.13977	1.23314	TOP2A;UHRF1;HSPA4;HMGB2;EEF2;ACTG1;MORF4L1;SUMO1;NCL;ANP32E;DHX15;P4HB;ANP32B;NDUFV2;GAPDH
Infection by Yersinia enterocolitica C0238528 mouse GSE2973 sample 127	11/284	0.342357	0.825395	0	0	1.1684	1.25241	EEF1A1;ABCC3;RPS14;CDC34;SEC14L1;SPATA13;PLEKHA6;PLXNB2;MYO9B;NEAT1;NFE2L2
Cardiac Hypertrophy C1383860 mouse GSE1621 sample 51	12/313	0.344807	0.828921	0	0	1.15652	1.23143	HSPA9;PLEKHB2;UBE2B;SUMO1;HDLBP;UQCR11;LMO7;SDHA;NDUFV2;GAPDH;USF2;SPTBN1
Obesity C0028754 human GSE474 sample 236	9/229	0.34928	0.837274	0	0	1.18556	1.24707	EEF1A1;MGST3;ANP32B;CALM2;PRSS23;GAPDH;ACTB;ACTG1;PTPN3
hepatocellular carcinoma DOID-684 human GSE57957 sample 660	11/286	0.350709	0.838305	0	0	1.16023	1.21568	ERRFI1;LIPC;RXRA;COBLL1;ADIRF;TRIB3;ANP32B;GAPDH;INIP;EPN1;ACTG1
Epilepsy C0014544 human GSE7486 sample 417	15/401	0.353038	0.841475	0	0	1.1284	1.17487	UHRF1;MGST3;HMGB2;LITAF;KTN1;HADHA;AP3S1;MACROD2;SNRPF;ANP32B;SLIRP;NDUFV2;UBA52;CALM2;MMADHC
Neurofibromatosis DOID-8712 mouse GSE1482 sample 667	9/231	0.358653	0.852437	0	0	1.1753	1.20515	INPP4A;MBD3;EEF1A1;PLEKHB2;U2AF2;GAPDH;ACTB;EPN1;ACTG1
Huntington's disease DOID-12858 mouse GSE5786 sample 721	9/231	0.358653	0.850029	0	0	1.1753	1.20515	EEF1A1;PLLP;GNG7;CROCC;UQCR11;NEAT1;SDHA;GAPDH;ACTG1
Aplastic anaemia C0002874 human GSE3807 sample 424	13/346	0.362049	0.85566	0	0	1.1334	1.15151	ITGB2;PLAUR;IRS2;TGFBR2;EEF1A1;RPS14;VCAN;FAM102A;SPOCK2;PLXNB2;ANP32B;TNS3;GAPDH
Infantile neuronal ceroid lipofuscinosis C0268281 mouse GSE6678 sample 141	10/262	0.370182	0.872424	0	0	1.15137	1.14419	RPS14;SLC2A1;CEP170B;SLC39A10;UQCR11;UBA52;SPTAN1;GAPDH;SPTBN2;PTPN3
Sjogren's syndrome DOID-12894 human GSE23117 sample 890	14/377	0.370387	0.87046	0	0	1.12022	1.11261	LGALS3BP;APP;HDLBP;EEF2;ACTG1;COX3;RPL35;COX2;CD9;P4HB;UBA52;KIAA0319L;GAPDH;MGLL
Nemaline Myopathy C0206157 mouse GSE3384 sample 78	9/234	0.372768	0.873611	0	0	1.16023	1.14491	SVIL;MORF4L1;PLEKHB2;SGTA;PPL;GAPDH;ACTB;SPTBN1;PLEC
Hypoxia C0242184 human GSE4630 sample 250	13/349	0.373592	0.873103	0	0	1.12366	1.10634	CLUH;MGST3;UQCR11;PLOD1;EEF2;RANGAP1;ACTG1;NCL;RPL35;FLNA;ANP32B;MGLL;TGM2
Papillary Carcinoma of the Thyroid C0238463 human GSE3678 sample 306	11/292	0.375946	0.876164	0	0	1.13639	1.11174	AKAP12;ERRFI1;LIMCH1;IRS1;ADIRF;EMP1;DEK;SEC62;ARHGAP6;ACTB;SPTBN1
Hypertrophy C0020564 rat GSE739 sample 57	11/292	0.375946	0.873737	0	0	1.13639	1.11174	LGALS3BP;HADHA;IQSEC1;COX3;COX2;CYTB;GAPDH;ACTB;ND5;EPN1;ACTG1
familial combined hyperlipidemia DOID-13809 human GSE11393 sample 773	12/321	0.376856	0.873431	0	0	1.1277	1.10051	OSBPL9;GNA13;SVIL;SEC14L1;IQSEC1;TBC1D5;ITGB2;NRIP1;IRS2;CHAC1;EZR;LITAF
schizophrenia DOID-5419 human GSE21935 sample 855	13/350	0.377451	0.8724	0	0	1.12045	1.09167	APP;LIMCH1;IQSEC1;PLLP;TSC1;ACTG1;ANLN;CLIP2;ALCAM;FMNL2;MYO18A;CD9;SEC62
Senescence C0001792 human GSE1786 sample 114	9/236	0.382206	0.880965	0	0	1.15039	1.10644	RGS3;MGST3;HUWE1;SDHA;NDUFV2;CALM2;GAPDH;MGLL;PARL
Lung transplant rejection C0729958 human GSE2018 sample 66	10/265	0.383537	0.88161	0	0	1.13834	1.09089	LGALS3BP;LASP1;ANXA1;MGST3;PLAUR;CD9;IRS2;CALM2;LITAF;ACTB
Emery-Dreifuss muscular dystrophy, autosomal dominant form DOID-11726 mouse GSE8000 sample 676	10/265	0.383537	0.879201	0	0	1.13834	1.09089	HADHA;SVIL;MGST3;ARL3;UQCR11;PPP2R3A;NDUFV2;TOB2;GAPDH;ACTB
systemic lupus erythematosus (SLE) DOID-9074 human GSE36700 sample 512	11/294	0.384405	0.878789	0	0	1.12866	1.07906	EEF1A1;RPS14;VCAN;HUWE1;TNC;RPL35;LTBP2;EEF2;HSPG2;UBA52;ND4
Pulmonary Fibrosis C0034069 mouse GSE2640 sample 406	11/294	0.384405	0.876401	0	0	1.12866	1.07906	EEF1A1;RPS14;MACF1;ALCAM;LIMCH1;CTDSPL;TMCC2;MALAT1;NEAT1;CALM2;SPTBN1
head and neck squamous cell carcinoma 5520 human GSE6631 sample 458	9/237	0.386932	0.879771	0	0	1.14554	1.0877	SCEL;ANXA1;MAST4;ADIRF;EMP1;ACTN4;EZR;PPL;EPHA2
endometrial cancer DOID-1380 human GSE17025 sample 842	11/295	0.38864	0.881269	0	0	1.12483	1.06308	ERRFI1;RPS14;MORF4L1;DMXL1;ALDH1A2;RPL35;MALAT1;SEC62;OGT;SKP1;ACTG1
Nemaline Myopathy C0206157 mouse GSE3384 sample 160	12/324	0.388968	0.879633	0	0	1.11726	1.05498	INPP4A;EEF1A1;ABCC3;ERRFI1;PIGR;MORF4L1;B4GALT1;EMP1;UQCR11;SDHA;PPL;ACTG1
Muscular Dystrophy C0026850 mouse GSE3252 sample 158	9/238	0.39166	0.883341	0	0	1.14073	1.06927	HADHA;RNF11;PPTC7;UBE2B;IRS1;UQCR11;CHAC1;SDHA;GAPDH
Down syndrome DOID-14250 human GSE20910 sample 1063	10/267	0.392461	0.882775	0	0	1.12981	1.05673	EEF1A1;PRKCH;CBX1;CD9;NUCKS1;IRS2;DEK;EZR;UBA52;KTN1
Cardiac Failure C0018801 mouse GSE1988 sample 273	12/325	0.393013	0.881652	0	0	1.11382	1.04021	HADHA;CDC34;MGST3;ARL3;RPL35;ANO10;H2AFV;UQCR11;VLDLR;SLIRP;NDUFV2;ACTG1
Spinal Cord Injury C0037929 rat GSE16710 sample 427	12/326	0.397061	0.888359	0	0	1.1104	1.02564	ERRFI1;PPP4R2;HSPA4;FAM208B;PHIP;NUP153;SLIRP;SEC62;RAB11FIP3;INIP;CCAR1;KTN1
autism spectrum disorder DOID-0060041 human GSE25507 sample 1029	11/297	0.397122	0.886131	0	0	1.11726	1.0318	MVP;ITGB2-AS1;HUWE1;COX2;COX1;LITAF;GAPDH;ACTB;MMADHC;ACTG1;ND4
testis seminoma DOID-5842 human GSE8607 sample 624	15/414	0.399487	0.889044	0	0	1.09297	1.00288	CBX1;HDLBP;HMGB2;TUBG1;SDHA;GIGYF2;KTN1;HADHA;ALDH1A2;CANX;AP3S1;EZR;CALM2;VCL;SKP1
Hepatocellular carcinoma DOID-684 human GSE10393 sample 493	11/298	0.401367	0.890864	0	0	1.11351	1.0165	EEF1A1;LASP1;DHX15;MICAL2;EEF2;UBA52;CALM2;PRSS23;GAPDH;ACTB;ACTG1
ulcerative colitis DOID-8577 human GSE11223 sample 591	11/298	0.401367	0.888513	0	0	1.11351	1.0165	ZNF608;SALL1;PODXL2;MGAT5;NCL;HAS3;MKI67;NT5C2;MYH10;THOP1;SPTBN1
juvenile dermatomyositis UMLS CUI-C0263666 human GSE11971 sample 772	4/97	0.401834	0.887208	0	0	1.24396	1.13413	RPS14;HUWE1;UBA52;GAPDH
autism spectrum disorder DOID-0060041 human GSE25507 sample 1025	13/357	0.404574	0.890913	0	0	1.09848	0.994035	HMGB2;ACTN4;DEK;NEAT1;EEF2;LITAF;ACTG1;MORF4L1;CAPZB;COX1;GAPDH;MMADHC;SKP1
Smoldering multiple myeloma C1531608 human GSE5900 sample 404	8/212	0.405478	0.890565	0	0	1.13834	1.02756	EEF1A1;OSBPL9;LASP1;NCL;HUWE1;COX1;AP3S1;ACTG1
SCID - Severe combined immunodeficiency C0085110 mouse GSE3414 sample 201	11/299	0.405613	0.888537	0	0	1.10978	1.00142	AKAP12;EEF1A1;ERRFI1;RPS14;PPTC7;ARL3;ITGB2;CD9;TMCC2;GAPDH;ACTG1
Vulvar intraepithelial tumor UMLS CUI-C0346210 human GSE5563 sample 967	10/270	0.405868	0.886779	0	0	1.11726	1.00746	EEF1A1;COX2;ADIRF;EMP1;COX1;EEF2;UBA52;PPL;MGLL;ND4
familial hypercholesterolemia DOID-13810 human GSE6054 sample 910	11/300	0.409862	0.893179	0	0	1.10608	0.986555	MORF4L1;RNF11;VCAN;COX3;HMGB2;RPL35;ANP32B;NEAT1;LITAF;MMADHC;SKP1
Type 1 diabetes mellitus C0011854 human GSE10586 sample 9	8/213	0.410527	0.892312	0	0	1.13299	1.00872	AIM1;MORC4;COX2;COX1;EZR;TOB2;MEGF9;LIMS1
atopic dermatitis DOID-3310 human GSE32924 sample 857	12/330	0.413278	0.895969	0	0	1.09694	0.969297	ATP6V1A;SPEN;SCEL;SUPT16H;USP16;PDGFC;BTBD16;COBL;MALAT1;TOP1;EZR;MEGF9
Breast Cancer C0006142 human GSE1379 sample 392	11/302	0.418361	0.904652	0	0	1.09876	0.95747	BCAR3;ERRFI1;SEMA6A;GCNT1;CRIM1;SLC7A11;TNS4;MLLT3;LYPD6;INIP;DCBLD2
endometrial cancer DOID-1380 human GSE17025 sample 840	11/302	0.418361	0.902326	0	0	1.09876	0.95747	ERRFI1;RPS14;MORF4L1;EHF;SLTM;IRS1;ALDH1A2;RPL35;MALAT1;SEC62;SKP1
autism spectrum disorder DOID-0060041 human GSE25507 sample 1023	10/273	0.419284	0.901998	0	0	1.10498	0.960455	ATP6V1A;RPS14;MORF4L1;CAPZB;RPL35;COX1;UQCR11;SNRPF;DEK;NEAT1
acute myocardial infarction DOID-9408 mouse GSE775 sample 1000	6/157	0.420592	0.902498	0	0	1.15284	0.998463	SGTA;OGDH;EEF2;GAPDH;ACTB;PLEC
RA (rheumatoid arthritis) C0003873 human GSE3592 sample 183	12/332	0.421394	0.901912	0	0	1.09033	0.942253	EEF1A1;ABCC3;FCHSD1;NRP2;RBM25;SEC14L1;FNBP1;RPL35;NT5C2;UBA52;OGT;LIMS1
autism spectrum disorder DOID-0060041 human GSE25507 sample 1022	12/334	0.42951	0.916945	0	0	1.08381	0.915934	ATP6V1A;VCAN;SEC14L1;ITGB2;TNFAIP2;PLAUR;FLNA;ACTN4;LITAF;GAPDH;ACTB;MEGF9
Emery-Dreifuss muscular dystrophy, autosomal recessive form DOID-11726 mouse GSE8000 sample 677	12/334	0.42951	0.914617	0	0	1.08381	0.915934	HADHA;SVIL;CDC34;MGST3;ARL3;OGDH;UQCR11;PPP2R3A;SDHA;NDUFV2;TOB2;ACTB
COPD - Chronic obstructive pulmonary disease C0024117 human GSE1650 sample 36	7/188	0.431707	0.916967	0	0	1.1232	0.943497	ANXA1;MGST3;HUWE1;CD9;CALM2;ACTG1;TGFBR2
pancreatic ductal adenocarcinoma DOID-3498 mouse GSE53659 sample 699	4/101	0.431733	0.914708	0	0	1.19469	1.00348	EEF1A1;RRBP1;P4HB;UBA52
Vitamin A Deficiency C0042842 rat GSE1600 sample 359	12/335	0.433568	0.916281	0	0	1.08057	0.90304	ERRFI1;MGST3;HDLBP;RPL35;UQCR11;P4HB;UBA52;RAB11FIP3;LITAF;GAPDH;ACTB;ACTG1
autism spectrum disorder DOID-0060041 human GSE25507 sample 1024	9/247	0.434249	0.915414	0	0	1.09916	0.916853	EEF1A1;LASP1;VCAN;IQSEC1;TNFAIP2;PLAUR;COX1;LITAF;MEGF9
Parkinson's disease DOID-14330 human GSE7621 sample 940	13/365	0.435691	0.916153	0	0	1.0744	0.892636	LGALS3BP;MGST3;UQCR11;NUCKS1;EEF2;ACTG1;COX3;RPL35;PLS3;ANP32B;SEC62;NDUFV2;GAPDH
Heart Injury C0018805 mouse GSE4710 sample 75	12/336	0.437624	0.917917	0	0	1.07735	0.89032	HADHA;GOLGA4;CDC34;CLUH;PPTC7;UBE2B;OGDH;MYO18A;ANO10;UQCR11;SDHA;UBA52
hepatitis C DOID-1883 human GSE20948 sample 600	11/307	0.439602	0.919765	0	0	1.08086	0.888346	CAPZB;NXN;MGST3;PLS3;ACTN4;EEF2;UBA52;PRSS23;ACTB;SKP1;ACTG1
Ulcerative Colitis C0009324 human GSE1710 sample 264	14/397	0.445028	0.928802	0	0	1.06379	0.86126	FTO;MGEA5;PRKCH;LTBP2;SIPA1L3;INIP;MPP7;SKA2;C9ORF85;DCBLD2;UBN2;SMIM12;FAM120AOS;LIMS1
Depression 1596 human GSE12654 sample 462	11/309	0.448085	0.932862	0	0	1.07387	0.862071	APP;RPS14;FNBP1;MICAL2;SARS;ANP32B;NMNAT2;PLOD1;TUBG1;KLC1;RANGAP1
Schizophrenia C0036341 human GSE4036 sample 357	11/309	0.448085	0.930553	0	0	1.07387	0.862071	EEF1A1;ATP6V1A;MORF4L1;SLC38A1;COX3;MICAL2;KCNJ16;NEAT1;TNS3;GAPDH;ACTG1
pancreatic non-invasive intraductal papillary-mucinous carcinoma DOID-7685 human GSE19650 sample 609	10/280	0.450541	0.933343	0	0	1.07735	0.858981	ERRFI1;MORF4L1;VCAN;PDGFC;CRIM1;RPL35;EMP1;PLS3;PRSS23;MYH10
Psoriasis vulgaris C0263361 human GSE6710 sample 444	11/310	0.452322	0.934724	0	0	1.0704	0.849216	SCEL;MORF4L1;MGST3;PDGFC;ADIRF;PLS3;CD9;ANP32B;UBA52;CALM2;ACTG1
Hypoxia C0242184 mouse GSE2271 sample 446	11/310	0.452322	0.932428	0	0	1.0704	0.849216	TRABD;ANLN;MKLN1;CAPZB;GDA;MYO5B;SPOCK2;EMP1;ABL2;PRSS23;BICC1
Insulin Resistance DOID-9352 human GSE36297 sample 581	11/310	0.452322	0.930142	0	0	1.0704	0.849216	USP25;IRS1;CRIM1;IRS2;CPEB3;SDHA;NDUFV2;NT5C2;UBA52;LIMS1;PTPN3
Actinic keratosis C0022602 human GSE2503 sample 350	15/429	0.453614	0.930518	0	0	1.05475	0.833791	MGST3;UQCR11;EEF2;EEF1A1;MORF4L1;RPS14;SCEL;DHX15;RPL35;FAM3C;NDUFV2;UBA52;MMADHC;NFE2L2;SKP1
sporadic breast cancer DOID-8029 human GSE3744 sample 979	14/400	0.456241	0.933625	0	0	1.05581	0.828527	FTO;CA12;PIGR;ANXA1;MAST4;IRS1;ITGA3;MYOF;ADIRF;LTBP2;GRAMD3;NEAT1;ALCAM;ABLIM3
endometrial cancer DOID-1380 human GSE17025 sample 839	11/311	0.456555	0.931994	0	0	1.06696	0.836547	ERRFI1;RPS14;MORF4L1;SLTM;IRS1;ALDH1A2;RPL35;SEC62;EEF2;SKP1;ACTG1
actinic keratosis DOID-8866 human GSE2503 sample 628	15/430	0.457219	0.931084	0	0	1.0523	0.823522	MGST3;UQCR11;EEF2;EEF1A1;MORF4L1;RPS14;SCEL;DHX15;RPL35;FAM3C;NDUFV2;UBA52;MMADHC;NFE2L2;SKP1
ulcerative colitis DOID-8577 human GSE11223 sample 586	9/252	0.457817	0.930045	0	0	1.07735	0.841721	MBD3;HADHA;ABCC4;CENPF;LIPC;SETD1A;DCDC2;ACTN4;MKI67
Bipolar Disorder C0005586 human GSE5388 sample 107	12/341	0.457874	0.927914	0	0	1.06156	0.829247	APP;DOCK4;ATXN1;NCL;SHROOM2;MICAL2;CD9;SLIRP;KLC1;EEF2;CALM2;SKP1
Adenoma C0001430 human GSE8514 sample 294	13/371	0.459001	0.927957	0	0	1.05703	0.823109	ABCC3;RDX;IRS2;ACTN4;SDHA;EEF2;EEF1A1;VCAN;BRE;P4HB;EZR;NDEL1;MAP3K5
Eczema DOID-3310 human GSE32924 sample 509	11/312	0.460784	0.929322	0	0	1.06354	0.82406	ATP6V1A;SPEN;SCEL;SUPT16H;USP16;PDGFC;ARHGAP18;MALAT1;TOP1;EZR;EREG
Hypertrophy, Left Ventricular C0149721 rat GSE2116 sample 248	11/313	0.465008	0.935592	0	0	1.06014	0.811752	HADHA;EIF5B;IQSEC1;MGST3;HDLBP;UQCR11;SDHA;NDUFV2;UBA52;RAB11FIP3;TRIOBP
Small cell carcinoma of lung C0149925 human GSE1037 sample 362	13/373	0.466751	0.936851	0	0	1.05136	0.801094	SPON1;ANXA1;CRIM1;EMP1;SARS;SYNE1;AIM1;SNRK;DLC1;CD9;TMCC2;EZR;ST6GALNAC5
Peripheral motor neuropathy C0235025 mouse GSE1947 sample 104	12/344	0.469984	0.941091	0	0	1.0523	0.794545	SVIL;MGEA5;FUT8;RNF11;SPTLC2;LIMCH1;ARL3;CD9;PRKCA;RRBP1;MAP4;EPN1
acute myocardial infarction DOID-9408 mouse GSE775 sample 1005	6/166	0.473367	0.945608	0	0	1.09033	0.815443	ABCC3;MGEA5;PLEKHB2;MGST3;HDLBP;OGDH
melanoma DOID-1909 human GSE6887 sample 949	11/315	0.473441	0.943509	0	0	1.05341	0.787666	EXT1;EDAR;LGALS3BP;SPATA13;PDGFC;FAF2;ERC1;BICD1;OXR1;MGLL;LIMS1
Duchenne muscular dystrophy (DMD) C0013264 mouse GSE1472 sample 62	11/315	0.473441	0.941273	0	0	1.05341	0.787666	MAP2K3;FTO;MORF4L1;UBE2B;RPS6KA2;ARL3;OGDH;HDLBP;SDHA;NDUFV2;PARL
Severe acute respiratory syndrome (SARS) C1175175 human GSE1739 sample 165	14/405	0.474879	0.941899	0	0	1.04277	0.776549	MACF1;PRKCH;DYRK1A;ADAM10;DEK;EEF2;ACTB;TGFBR2;MORF4L1;CANX;DHX15;RPL35;CALM2;SKP1
nemaline myopathy DOID-3191 mouse GSE3384 sample 972	8/226	0.475773	0.941448	0	0	1.06782	0.793191	MBD3;SVIL;PLEKHB2;PPTC7;UBE2B;SUMO1;ITSN1;ACTG1
HIV - Human immunodeficiency virus infection C0019693 human GSE2171 sample 40	8/226	0.475773	0.939233	0	0	1.06782	0.793191	RPS14;VCAN;ANXA1;TNFAIP2;PLAUR;EEF2;NDEL1;NFE2L2
pancreatic cancer DOID-1793 human GSE23952 sample 798	10/286	0.477166	0.939771	0	0	1.05475	0.780401	LGALS3BP;SMAD3;GDA;DMXL1;TSPAN4;THSD7A;FAT4;PPL;GPRC5C;LGR4
schizophrenia DOID-5419 human GSE21935 sample 854	10/286	0.477166	0.93757	0	0	1.05475	0.780401	FTO;APP;GDA;SLC39A10;COX1;NDUFV2;UBA52;GAPDH;ACTB;SKP1
schizophrenia 5419 human GSE12654 sample 465	11/316	0.477649	0.936326	0	0	1.05008	0.775882	APP;HADHA;CANX;CEP170B;MICAL2;P4HB;EZR;CALM2;ACTB;AHDC1;ACTG1
Bacterial Infection C0004623 human GSE4748 sample 414	11/316	0.477649	0.934143	0	0	1.05008	0.775882	RPS14;AIM1;COX3;RPL35;COX1;MALAT1;NDUFV2;UBA52;FNIP2;SKP1;TGFBR2
breast cancer DOID-1612 human GSE26910 sample 602	13/376	0.478345	0.933329	0	0	1.04297	0.76911	SEMA6A;CRIM1;ADIRF;EMP1;TFPI;PPL;PLCB4;ABLIM3;THSD7A;FAT4;MGLL;EPHA2;CREB5
mytonic dystrophy Type 1 DOID-11722 human GSE7179 sample 1049	11/317	0.48185	0.937987	0	0	1.04677	0.764267	RBM25;DDX27;NASP;HSPA4;NCL;CBX1;MALAT1;ANP32B;EEF2;UBA52;GAPDH
acute myeloid leukemia DOID-9119 human GSE9476 sample 782	15/437	0.482382	0.936848	0	0	1.03544	0.754858	APP;SLC38A1;PRKCH;IQSEC1;SYNE1;TGFBR2;KIAA0513;VCAN;FAM102A;ATXN1;SPOCK2;TMCC2;MYH10;MAD1L1;MEGF9
Bacterial Infection C0004623 mouse GSE6435 sample 133	9/258	0.485873	0.94145	0	0	1.0523	0.759557	ANLN;ANXA1;INCENP;MGST3;OGDH;PLAUR;ACTN4;EEF2;RAI14
facioscapulohumeral muscular dystrophy DOID-11727 human GSE15090 sample 541	15/438	0.485963	0.939453	0	0	1.03308	0.745494	OSBPL9;SVIL;RNF11;NXN;MGST3;PPP2R3A;EEF2;KTN1;GOLGA4;OBSCN;SUMO1;COX3;MYO18A;UBA52;MMADHC
fragile X syndrome DOID-14261 human GSE7329 sample 809	10/288	0.485986	0.937339	0	0	1.04743	0.755798	ZNF462;IRS1;MTCL1;PHF12;MACC1;CRIM1;CTDSPL;DCDC2;BRCA2;GRAMD3
prolactinoma DOID-5394 human GSE36314 sample 636	15/440	0.493111	0.9489	0	0	1.02838	0.727088	RNF11;SPON1;TNC;CRIM1;HMGB2;COBL;LITAF;PPL;ACTG1;DLEU1;CD9;EZR;CALM2;NFE2L2;TGM2
Type 1 diabetes mellitus C0011854 mouse GSE2254 sample 204	7/200	0.495966	0.952209	0	0	1.05581	0.740382	INPP4A;MACF1;SMARCC1;TOP1;MLLT3;ACTB;EPN1
PTSD - Post-traumatic stress disorder C0038436 human GSE860 sample 338	11/321	0.498582	0.955047	0	0	1.03372	0.719457	ANXA1;NCL;CANX;HMGB2;RPL35;PRPF40A;FAM208A;AATF;EEF2;GAPDH;ACTB
AML - Acute myeloid leukemia C0023467 human GSE2191 sample 112	9/261	0.499772	0.955145	0	0	1.0402	0.721489	MAP2K3;MGST3;H2AFV;CD9;UQCR11;TUBG1;LITAF;GIGYF2;VCL
idiopathic pulmonary fibrosis DOID-0050156 human GSE24206 sample 871	11/323	0.506899	0.966564	0	0	1.02732	0.698007	AKAP12;ERRFI1;SEC14L1;CBS;RPS6KA2;EMP1;IRS2;SLC7A11;TOP1;TFPI;MAMLD1
Huntington's disease DOID-12858 mouse GSE3248 sample 725	11/324	0.511044	0.972258	0	0	1.02415	0.687513	INPP4A;MACF1;SVIL;SNRK;PPTC7;ARL3;SPOCK2;CIC;SPTAN1;EPN1;SPTBN2
Type 1 diabetes mellitus C0011854 mouse GSE11 sample 178	10/294	0.512226	0.972302	0	0	1.02605	0.686418	GNA13;MGEA5;LASP1;SPOCK2;ANP32E;HNF1B;FAM3C;KLC1;TNS3;PDE9A
colon adenoma DOID-0050912 mouse GSE422 sample 650	6/173	0.513453	0.972432	0	0	1.04622	0.697404	PIGR;PPTC7;SHROOM3;H2AFV;RRBP1;EPN1
Pulmonary Hypertension C0020542 human GSE703 sample 241	6/173	0.513453	0.970242	0	0	1.04622	0.697404	EEF1A1;RPS14;NCL;SPOCK2;RPL35;ACTB
skin squamous cell carcinoma DOID-3151 human GSE45164 sample 657	10/295	0.516562	0.973923	0	0	1.02257	0.67547	EDAR;CLIP2;ALCAM;NFIB;PDGFC;NMNAT2;FNBP1L;DBN1;LGR4;CREB5
Down syndrome DOID-14250 human GSE19681 sample 1065	9/265	0.518135	0.974699	0	0	1.0245	0.67363	RNF11;LASP1;PLEKHB2;DHX15;COX2;GAPDH;VCL;SKP1;ACTG1
Psoriasis vulgaris C0263361 human GSE14905 sample 93	8/236	0.524787	0.985002	0	0	1.02257	0.659318	KDM5A;BCAR3;ERRFI1;ANXA1;DUSP10;PDGFC;MALAT1;FNBP1L
Breast Cancer C0006142 human GSE3744 sample 24	15/449	0.52501	0.983222	0	0	1.00777	0.649344	FTO;CMTM7;PIGR;EHF;ANXA1;CRIM1;LTBP2;VLDLR;GRAMD3;PPL;TGFBR2;NFIB;ALDH1A2;HAS3;RBMS3
Congestive heart disease C0018802 mouse GSE2236 sample 258	11/328	0.527521	0.985724	0	0	1.01166	0.647025	HADHA;OBSCN;PPTC7;UBE2B;ANO10;UQCR11;VLDLR;PPP2R3A;NEAT1;SDHA;PTPN3
polycystic ovary syndrome DOID-11612 human GSE48301 sample 806	12/359	0.529692	0.987581	0	0	1.00833	0.640754	TOP2A;ANLN;CENPF;NFIB;CD9;UQCR11;SNRPF;CLSPN;MKI67;SAE1;ADAMTS9;KIF15
Turner Syndrome C0041408 mouse GSE1606 sample 218	11/329	0.531613	0.988965	0	0	1.00859	0.637265	INPP4A;ITGB1;MGEA5;B4GALT1;NCL;ANP32E;DYRK1A;SARS;ACTB;EPN1;ACTG1
Neurofibromatosis DOID-8712 mouse GSE1482 sample 668	12/360	0.533604	0.990473	0	0	1.00553	0.631575	MBD3;ITGB1;PLEKHB2;MGST3;SIRPA;UQCR11;LMO7;HIVEP2;KLC1;RANGAP1;ACTG1;KPNA1
colorectal adenocarcinoma DOID-0050861 mouse GSE31106 sample 1070	11/330	0.535693	0.992156	0	0	1.00553	0.627645	ABCC3;RPS14;PIGR;B4GALT1;GDA;MGST3;CD9;UQCR11;ACTN4;NEAT1;UBA52
amyotrophic lateral sclerosis DOID-332 mouse GSE10953 sample 680	6/177	0.535837	0.990237	0	0	1.02257	0.638008	MAPK10;NRP2;SLC2A1;MALAT1;CALM2;SPTBN1
hepatocellular carcinoma DOID-684 human GSE49515 sample 554	9/269	0.536276	0.98887	0	0	1.00927	0.628881	DOCK4;NRIP1;PLAUR;EMP1;FAM3C;MACROD2;EZR;ARHGAP24;NDEL1
fragile X syndrome DOID-14261 human GSE7329 sample 515	10/301	0.542318	0.997818	0	0	1.00219	0.613242	LOC100422737;IRS1;MGST3;TRPS1;C2ORF88;CRIM1;CTDSPL;GRAMD3;FNIP2;SNTB1
acute myeloid leukemia DOID-9119 human GSE9476 sample 783	15/455	0.545966	1	0	0	0.994481	0.601857	OSER1;SVIL;SLC38A1;DOCK4;IRS2;ASAP1;ARHGAP26;LITAF;TGFBR2;KIAA0513;SNRK;SEC14L1;RARA;MEGF9;CREB5
dilated cardiomyopathy DOID-12930 human GSE42955 sample 678	10/303	0.550794	1	0	0	0.995575	0.593756	FAM160A1;TMEM245;RPS6KA2;GRPEL2;NRIP1;CTDSPL;MIR21;NMNAT2;B4GALNT3;TGFBR2
Leukemia DOID-1240 mouse GSE44025 sample 482	10/303	0.550794	1	0	0	0.995575	0.593756	LGALS3BP;SNRK;NEBL;ANO10;NEAT1;TNS3;FHIT;UACA;CDK5RAP2;FAM120AOS
Gamma-hydroxybutyric acidaemia C0268631 mouse GSE2866 sample 311	9/273	0.554164	1	0	0	0.994481	0.587036	NCOR2;PLEKHB2;PPTC7;CAPZB;SPOCK2;FAM120A;IRS2;EEF2;ACTG1
polycystic ovary syndrome 11612 human GSE48301 sample 468	13/397	0.557808	1	0	0	0.987801	0.57662	ABCC4;SEMA6A;TNC;CTDSPL;SARS;C12ORF75;PARL;KIF15;KIAA1524;ANLN;ALDH1A2;PHACTR4;RBMS3
Breast Cancer C0006142 rat GSE1872 sample 63	12/367	0.560679	1	0	0	0.986351	0.570709	RPS14;HADHA;MORF4L1;GDA;OGDH;UQCR11;CYTB;SDHA;EEF2;PRSS23;MGLL;TGM2
polycystic ovary syndrome DOID-11612 human GSE8157 sample 880	9/275	0.563004	1	0	0	0.987248	0.567143	RPS14;SLC38A1;RILPL1;NXN;HUWE1;CRIM1;RPL35;C12ORF75;UBA52
Psoriasis vulgaris C0263361 human GSE13355 sample 35	6/182	0.563183	1	0	0	0.994481	0.570982	BCAR3;SCEL;BTBD16;COBL;ASAP2;RAI14
abdominal aortic aneurysm DOID-7693 human GSE47472 sample 1011	11/337	0.563903	1	0	0	0.984644	0.564077	ZNF462;CENPF;DOCK4;FGD6;CANX;SGTA;TBCD;CEP170B;ANP32B;TTC7A;NR2F6
amyotrophic lateral sclerosis DOID-332 mouse GSE10953 sample 681	11/337	0.563903	1	0	0	0.984644	0.564077	EEF1A1;MAPK10;MORF4L1;SUMO1;HSPA4;CANX;UQCR11;SDHA;KLC1;NDUFV2;CALM2
autism spectrum disorder DOID-0060041 human GSE7329 sample 1034	10/308	0.571713	1	0	0	0.979413	0.547607	LOC100422737;MORC4;IRS1;CRIM1;CTDSPL;DCDC2;BRCA2;GRAMD3;FNIP2;SNTB1
Gamma-hydroxybutyric acidaemia C0268631 mouse GSE2866 sample 205	10/308	0.571713	1	0	0	0.979413	0.547607	APP;SNRK;NFIB;SPOCK2;RRP1;OGDH;DAB2IP;EEF2;SPTAN1;SPTBN2
progressive myoclonus epilepsy DOID-891 mouse GSE47516 sample 518	11/339	0.571838	1	0	0	0.978835	0.54707	LATS1;ABCC4;STIL;BTD;HSPA4;PDGFC;EMP1;FAM208B;FAT4;VGLL4;BICC1
ulcerative colitis DOID-8577 human GSE1710 sample 993	12/370	0.5721	1	0	0	0.978354	0.546354	FTO;MGEA5;UBN2;LITAF;SIPA1L3;INIP;SMIM12;SKA2;FAM120AOS;C9ORF85;DCBLD2;LIMS1
Tendonopathy 971 human GSE26051 sample 470	9/278	0.576124	1	0	0	0.976594	0.538525	APP;EIF5B;COX3;MYO18A;RPL35;COX1;ZNF205;ANP32B;ND4
diabetic retinopathy DOID-8947 mouse GSE12610 sample 911	9/278	0.576124	1	0	0	0.976594	0.538525	ATXN1;ARL3;ANP32B;PDE6A;EEF2;TOB2;ACTB;LUC7L2;PARL
Anaplasmosis C0002797 human GSE2600 sample 21	12/373	0.5834	1	0	0	0.970485	0.522977	HADHA;COX3;RPL35;SLC39A10;TRIB3;COX1;KIF20A;SLIRP;C12ORF75;NDUFV2;EEF2;UBA52
Treacher Collins syndrome DOID-2908 mouse GSE10167 sample 480	11/342	0.583629	1	0	0	0.970249	0.522469	RPS14;MORF4L1;IRS1;UHRF1;LONP1;ANP32E;H2AFV;FNBP1L;BRCA2;NDUFV2;PTPRF
schizophrenia DOID-5419 human GSE62105 sample 547	10/311	0.584065	1	0	0	0.969965	0.521591	CA12;SPON1;SALL1;GDA;ALDH1A2;SPATA13;PCED1B;NHS;TNS4;ST6GALNAC5
polycystic ovary syndrome DOID-11612 human GSE10946 sample 825	9/280	0.584774	1	0	0	0.969619	0.52023	SETD2;SEMA6A;PARD3;MYO18A;FLNA;ACTN4;PRSS23;PWRN1;MAD1L1
testis seminoma DOID-5842 human GSE8607 sample 622	11/343	0.587528	1	0	0	0.96742	0.514505	EEF1A1;ALDH1A2;CANX;HDLBP;HMGB2;AP3S1;TUBG1;CALM2;VCL;SKP1;KTN1
intracranial aneurysm DOID-10941 human GSE26969 sample 744	14/437	0.59032	1	0	0	0.966414	0.509387	FNBP1;TNC;ADIRF;DEK;C12ORF75;NEAT1;EEF2;ACTG1;AIM1;SLTM;RPL35;COX2;FLNA;COX1
invasive lobular carcinoma DOID-3457 human GSE5764 sample 625	10/313	0.592211	1	0	0	0.963767	0.504909	EEF1A1;FTO;ERRFI1;PIGR;ANXA1;MYOF;COX2;GRAMD3;EEF2;MGLL
Rett Syndrome C0035372 human GSE6955 sample 390	7/219	0.592271	1	0	0	0.964207	0.505043	EEF1A1;TSPAN4;ACIN1;ACTN4;BAIAP2;CALM2;ACTB
Hypertension C0020538 mouse GSE1674 sample 400	9/282	0.593341	1	0	0	0.962742	0.502537	EEF1A1;LGALS3BP;MACF1;OGDH;H2AFV;UQCR11;NDUFV2;GAPDH;ACTB
nemaline myopathy DOID-3191 mouse GSE3384 sample 973	6/188	0.59495	1	0	0	0.962742	0.499931	INPP4A;APP;UBE2B;P4HB;CALM2;GAPDH
Alexander Disease C0270726 mouse GSE977 sample 87	10/314	0.596257	1	0	0	0.960698	0.496761	INPP4A;ATP6V1A;APP;RNF11;PLEKHB2;SUMO1;KLC1;CALM2;GAPDH;EPN1
chronic myeloid leukemia DOID-8552 mouse GSE48438 sample 501	7/220	0.597085	1	0	0	0.959824	0.494978	PTPRD;VCAN;TNC;UQCR11;METTL21A;ARHGAP24;RAI14
Diabetes DOID-9351 mouse GSE31150 sample 805	11/346	0.599127	1	0	0	0.959032	0.491295	ATP6V1A;ERRFI1;SCARA3;GALE;RDX;HDLBP;SLC39A10;TRIB3;CHAC1;FAM3C;MKI67
Cancer of the Intestine C0346627 mouse GSE3915 sample 90	10/315	0.600284	1	0	0	0.957648	0.488738	PIGR;GALE;CANX;DHX15;RPL35;FAM192A;MALAT1;ACTN4;EZR;ACTB
Cancer of the Stomach C0024623 human GSE2685 sample 361	8/254	0.60832	1	0	0	0.950107	0.472255	RPS14;LASP1;GALE;SCNN1A;ADIRF;ITPR3;EZR;NDUFV2
Cystic Fibrosis C0010674 mouse GSE765 sample 65	9/286	0.610221	1	0	0	0.949277	0.468881	APP;MGST3;OGDH;H2AFV;LMO7;EZR;SPTBN1;EPN1;PLEC
breast cancer DOID-1612 human GSE3744 sample 978	14/443	0.610804	1	0	0	0.953325	0.469969	FTO;CMTM7;PIGR;EHF;ANXA1;CRIM1;COBL;LTBP2;GRAMD3;PPL;TGFBR2;NFIB;HAS3;RBMS3
multiple myeloma DOID-9538 human GSE47552 sample 561	10/318	0.612248	1	0	0	0.948614	0.465406	AKAP12;VCAN;B4GALT1;RFC1;COBLL1;ASXL2;TRIP11;CD9;FLNB;KIAA0319L
idiopathic pulmonary fibrosis DOID-0050156 human GSE24206 sample 869	6/192	0.615433	1	0	0	0.942685	0.457607	CBS;EMP1;LMO7;SLC7A11;TFPI;MAMLD1
Gastrointestinal stromal tumor C0238198 human GSE2719 sample 270	7/224	0.616044	1	0	0	0.942685	0.456671	AKAP12;ANXA1;ADIRF;EMP1;FLNA;PLS3;LTBP2
autism spectrum disorder DOID-0060041 human GSE28521 sample 1040	8/259	0.630152	1	0	0	0.931766	0.430284	CTIF;ITCH;CBS;GRPEL2;VPS13D;SEC62;OXR1;PARL
Cardiomyopathy, Dilated C0007193 human GSE9800 sample 115	9/291	0.630814	1	0	0	0.932966	0.429859	NXN;SLC2A1;DDX54;RCE1;MACROD2;SRGAP3;THOP1;MAD1L1;NR2F6
Huntington's disease DOID-12858 mouse GSE3248 sample 726	7/228	0.634511	1	0	0	0.926146	0.421305	APP;SNRK;SPOCK2;DAB2IP;CALM2;SPTAN1;SPTBN2
Arrhythmogenic Right Ventricular Cardiomyopathy C0349788 mouse GSE4120 sample 432	9/292	0.634862	1	0	0	0.929771	0.422439	ANXA1;OGDH;RPL35;LMO7;VLDLR;NEAT1;NDUFV2;ACTB;TGM2
Niemann-Pick Type C disease DOID-14504 mouse GSE39621 sample 471	11/356	0.636652	1	0	0	0.932093	0.42087	EEF1A1;ABCC3;RPS14;FAM111A;GDA;MGST3;DHX15;ANP32B;DEK;MKI67;ACTB
Alzheimer's disease DOID-10652 human GSE36980 sample 520	10/325	0.639457	1	0	0	0.928182	0.415023	CA12;ATP6V1A;KIAA1524;BDNF;NEDD4L;FAM3C;MET;OXR1;ST6GALNAC5;PTPN3
Niemann-Pick Type C DOID-14504 mouse GSE39621 sample 495	11/357	0.640302	1	0	0	0.929482	0.414377	EEF1A1;ABCC3;RPS14;FAM111A;GDA;MGST3;DHX15;MALAT1;ANP32B;DEK;MKI67
schizophrenia DOID-5419 human GSE27383 sample 549	9/296	0.650812	1	0	0	0.917207	0.393972	ZNF276;AKAP12;CLIP2;ANXA1;FMNL2;IL3RA;PLS3;SH3BP4;MAD1L1
autism spectrum disorder DOID-0060041 human GSE28521 sample 1039	8/264	0.651302	1	0	0	0.914119	0.391957	TRABD;APP;KIAA0513;ABLIM2;CBS;ADIRF;NKTR;RAI14
Myocardial Infarction C0027051 rat GSE4105 sample 437	8/264	0.651302	1	0	0	0.914119	0.391957	MGST3;OGDH;COX1;UQCR11;CYTB;SDHA;NDUFV2;GAPDH
Neurogenic Muscular Atrophy C0270948 rat GSE2566 sample 396	12/392	0.651734	1	0	0	0.923446	0.395345	EEF1A1;MORF4L1;APP;RPS14;MGST3;EMP1;DEK;MMADHC;LUC7L2;METAP2;SKP1;ACTG1
Dermatomyositis C0011633 human GSE1551 sample 130	7/232	0.652462	1	0	0	0.910178	0.388648	SVIL;MGST3;RPL35;UQCR11;NDUFV2;EEF2;UBA52
acute myocardial infarction DOID-9408 mouse GSE775 sample 1003	9/297	0.654737	1	0	0	0.914119	0.387149	MGEA5;RNF11;UBE2B;LIMCH1;MGST3;OGDH;UQCR11;SDHA;NDUFV2
cervical cancer DOID-4362 human GSE9750 sample 619	8/265	0.655448	1	0	0	0.910669	0.3847	RPS14;ANXA1;HUWE1;EMP1;CD9;UBA52;PPL;CALM2
Spinal Muscular Atrophy, Infantile C0043116 mouse GSE3075 sample 126	5/168	0.658214	1	0	0	0.897795	0.37548	APP;ANLN;TMCC2;SDHA;EEF2
Acute Lung Injury C0242488 human GSE10474 sample 168	10/330	0.658248	1	0	0	0.914119	0.38226	APP;DOCK4;ABLIM3;ZMIZ1;MYOF;IL3RA;PLAUR;ASAP2;DCP1A;NEAT1
Lewy body dementia DOID-12217 human GSE49036 sample 1068	7/234	0.661239	1	0	0	0.902399	0.373268	BDNF;C5ORF17;SUSD1;EMP1;KCNJ16;MYH10;VCL
monoclonal gammopathy of uncertain significance DOID-7442 human GSE47552 sample 563	9/300	0.666361	1	0	0	0.904977	0.367352	AKAP12;GOLGA3;B4GALT1;PHF12;ASXL2;TRIP11;CD9;KIAA0319L;MGLL
schizophrenia DOID-5419 human GSE17612 sample 852	8/268	0.66771	1	0	0	0.900475	0.363704	FTO;APP;COX2;SLC39A10;NUCKS1;ACTN4;GAPDH;ACTB
Diabetic Neuropathy C0011882 mouse GSE11343 sample 7	10/333	0.669253	1	0	0	0.905883	0.363796	RPS14;MORC4;ALDH1A2;CD9;MALAT1;AP3S1;SNRPF;P4HB;CALM2;ACTB
amyotrophic lateral sclerosis DOID-332 mouse GSE3343 sample 685	14/462	0.672326	1	0	0	0.914119	0.362916	PLEKHB2;PLLP;ARL3;OXR1;EPN1;ZMAT2;U2AF2;SPOCK2;PLS3;SIRPA;TMCC2;AP3S1;MAP4;OGT
Colitis C0009319 mouse GSE2172 sample 401	10/334	0.672876	1	0	0	0.903171	0.357832	LGALS3BP;APP;ERRFI1;MGST3;FAM120A;SLC2A1;EMP1;CD9;EEF2;EPN1
sickle-cell anemia DOID-10923 human GSE16728 sample 505	5/171	0.673388	1	0	0	0.882044	0.34879	ITGB2;COX3;COX2;COX1;ND4
Pseudomonas Infection C0033817 human GSE923 sample 170	7/239	0.682585	1	0	0	0.88352	0.337389	TOP2A;APP;ITGA3;HUWE1;ANP32B;EEF2;UBA52
ulcerative colitis DOID-8577 human GSE9452 sample 924	7/239	0.682585	1	0	0	0.88352	0.337389	SPON1;LURAP1L;IRS1;DMXL1;GLIS3;CRIM1;RNF111
Down Syndrome DOID-14250 human GSE23910 sample 494	7/239	0.682585	1	0	0	0.88352	0.337389	TOP2A;ADAM10;KIF20A;MKI67;SDHA;RANGAP1;PAK2
nemaline myopathy DOID-3191 mouse GSE3384 sample 975	7/239	0.682585	1	0	0	0.88352	0.337389	INPP4A;EEF1A1;ABCC3;ERRFI1;PIGR;MORF4L1;UQCR11
Huntington's disease DOID-12858 mouse GSE19780 sample 528	8/272	0.683645	1	0	0	0.887233	0.337429	SPEN;ZC3H11A;TSPAN4;DAB2IP;STK32A;CCAR2;NR2F6;MAP3K5
psoriasis DOID-8893 human GSE53431 sample 813	9/305	0.685215	1	0	0	0.890142	0.336493	ERRFI1;ALCAM;ARL3;GNG7;ADIRF;PRKCA;SNORD3A;TNS4;MET
discoid lupus erythematosus UMLS CUI-C0024138 human GSE52471 sample 689	7/240	0.68675	1	0	0	0.879839	0.33063	BCAR3;PLCB4;PLLP;LRP5;COBL;OBSL1;CREB5
Septic Shock C0036983 human GSE9692 sample 307	3/106	0.687137	1	0	0	0.853752	0.320346	RNF11;NRIP1;PRSS23
Carcinoma in situ of large intestine C0686087 human GSE4183 sample 190	8/273	0.687554	1	0	0	0.883983	0.331153	MGST3;COX3;RPL35;EMP1;UQCR11;MALAT1;ACTG1;ND4
bipolar disorder DOID-3312 human GSE62191 sample 546	9/306	0.688907	1	0	0	0.887233	0.330626	CMTM7;GALE;SUMO1;CBS;KCNQ1;ITGB2;IL3RA;THSD7A;SLIRP
Huntington's disease DOID-12858 mouse GSE3621 sample 703	11/371	0.689281	1	0	0	0.894407	0.332814	MAPK10;RPS14;GDA;GNG7;SLC39A10;FNBP1L;KLC1;KALRN;PLCXD2;MGLL;SPTBN2
Influenza C0021400 mouse GSE3203 sample 85	7/241	0.69088	1	0	0	0.876188	0.324005	BTD;FMNL2;HMGB2;FLNA;H2AFV;MKI67;NEAT1
Cardiomyopathy, Dilated C0007193 human GSE3585 sample 198	8/274	0.691432	1	0	0	0.880757	0.32499	DLEU1;RARA;PLAUR;ADIRF;MIR21;NEAT1;OBSL1;ADAMTS9
Waldenstrom Macroglobulinemia UMLS CUI-C0024419 human GSE6691 sample 784	9/307	0.692572	1	0	0	0.884343	0.324857	MACF1;ZNHIT6;GNG7;CTR9;GCNT1;ITGB2;RHBDF2;NRIP1;FAM3C
asthma DOID-2841 human GSE27011 sample 568	9/307	0.692572	1	0	0	0.884343	0.324857	MAP2K3;ANLN;ABCC4;STIL;DUSP10;NEDD4L;MICAL2;MKI67;KIF15
nemaline myopathy DOID-3191 mouse GSE3384 sample 971	3/107	0.693235	1	0	0	0.845773	0.30988	UQCR11;GAPDH;ACTG1
MS (Multiple Sclerosis) C0026769 mouse GSE842 sample 381	10/340	0.694115	1	0	0	0.887233	0.323945	MBD3;ATP6V1A;APP;MORF4L1;CDCP1;U2AF2;PDE6A;EEF2;CALM2;SPTBN1
Polycystic Ovary Syndrome C0032460 human GSE5090 sample 308	8/275	0.695281	1	0	0	0.877554	0.318938	MAP2K3;EEF1A1;SPSB1;VCAN;CANX;NEAT1;GAPDH;ACTG1
nasopharynx carcinoma DOID-9261 human GSE12452 sample 775	11/373	0.695941	1	0	0	0.889611	0.322476	PIGR;SCEL;ALCAM;ANXA1;GDA;ADIRF;PPL;PRSS23;MGLL;EPHA2;SLC16A5
type 1 diabetes mellitus 9744 rat GSE4990 sample 474	11/373	0.695941	1	0	0	0.889611	0.322476	FAM111A;FUT8;NCL;COX2;FAM3C;SNRPF;SDHA;GAPDH;ACTB;EGFR;NFE2L2
adrenoleukodystrophy DOID-10588 human GSE34309 sample 865	10/342	0.701003	1	0	0	0.882044	0.31334	MUS81;SETD5;PLCB4;MORC4;PLS3;KCNJ16;FAM208A;WHSC1;OXR1;TRIOBP
pulmonary sarcoidosis DOID-13406 human GSE16538 sample 916	5/177	0.702377	1	0	0	0.852144	0.30105	TBC1D2;ALDH1A2;NEAT1;SLC16A5;EPHA2
Osteoporosis C0029456 human GSE2208 sample 163	8/277	0.702885	1	0	0	0.871218	0.307159	KIAA0513;PARD3;COBLL1;TNFAIP2;LITAF;MGLL;VCL;CREB5
Type 2 diabetes mellitus C0011860 mouse GSE2899 sample 203	8/277	0.702885	1	0	0	0.871218	0.307159	FTO;ABCC3;APP;PLEKHB2;ZC3H11A;OGDH;HSPG2;MPP7
Idiopathic fibrosing alveolitis C0085786 human GSE21369 sample 321	8/277	0.702885	1	0	0	0.871218	0.307159	ATP6V1A;ERRFI1;SCEL;ANXA1;CBS;IRS2;SLC7A11;EPHA2
Oligodendroglioma C0028945 human GSE4290 sample 251	10/343	0.704411	1	0	0	0.879473	0.308162	APP;ANLN;LIMCH1;PLLP;GDA;SLC39A10;PLS3;AP3S1;KLC1;ACTG1
amyotrophic lateral sclerosis DOID-332 mouse GSE10953 sample 679	3/109	0.70516	1	0	0	0.830254	0.290033	MAPK10;UQCR11;UBA52
autism spectrum disorder DOID-0060041 human GSE7329 sample 1033	8/279	0.710365	1	0	0	0.864972	0.2958	PRELID2;LOC100422737;IRS1;TRPS1;C2ORF88;CRIM1;CTDSPL;SNTB1
Huntington's disease DOID-12858 mouse GSE3248 sample 728	9/312	0.71049	1	0	0	0.870171	0.297425	ATP6V1A;MORF4L1;RNF11;RGS3;MGST3;RRP1;DYRK1A;UQCR11;NDUFV2
Huntington's disease DOID-12858 mouse GSE3248 sample 727	7/246	0.711001	1	0	0	0.85838	0.292777	INPP4A;HSPA9;SNRK;MGST3;SPTAN1;SPTBN2;ACTG1
testis seminoma DOID-5842 human GSE8607 sample 623	10/345	0.711153	1	0	0	0.874374	0.298046	HADHA;ALDH1A2;CANX;HMGB2;AP3S1;TUBG1;SDHA;CALM2;SKP1;KTN1
colon carcinoma DOID-1520 mouse GSE422 sample 651	5/179	0.711633	1	0	0	0.842623	0.286655	PIGR;PPTC7;SHROOM3;H2AFV;EPN1
hepatocellular carcinoma DOID-684 human GSE58208 sample 735	4/145	0.712385	1	0	0	0.832163	0.282217	SUPT16H;ZC3H11A;MALAT1;FHIT
Simian Acquired Immune Deficiency Syndrome C0080151 human GSE4785 sample 92	7/247	0.714919	1	0	0	0.854904	0.286894	EEF1A1;LASP1;ANXA1;ANP32B;EEF2;UBA52;GAPDH
juvenile dermatomyositis UMLS CUI-C0263666 human GSE11971 sample 771	3/111	0.716728	1	0	0	0.815295	0.271542	HUWE1;UBA52;GAPDH
facioscapulohumeral muscular dystrophy DOID-11727 human GSE36398 sample 673	6/214	0.716928	1	0	0	0.845773	0.281456	TOP2A;BDNF;SMS;PRKCA;LINC00299;BICD1
RA (rheumatoid arthritis) C0003873 human GSE1919 sample 110	9/314	0.717466	1	0	0	0.864628	0.287083	ANXA1;NCL;RPL35;ADIRF;ACTN4;ANP32B;EEF2;PPL;TGFBR2
autism spectrum disorder DOID-0060041 human GSE25507 sample 1032	10/347	0.717796	1	0	0	0.869335	0.288245	ATP6V1A;VCAN;ITGB2;RPL35;IRS2;SLIRP;EEF2;UBA52;VCL;TGFBR2
hepatitis C virus related hepatocellular carcinoma UMLS CUI-C1333978 human GSE58208 sample 736	4/147	0.722365	1	0	0	0.820841	0.266957	ZC3H11A;NRIP1;MALAT1;FHIT
Erectile dysfunction associated with type 2 diabetes mellitus C1997651 rat GSE2457 sample 186	7/249	0.722646	1	0	0	0.848038	0.275473	RPS14;ASPH;UQCR11;P4HB;NDUFV2;GAPDH;SKP1
autism spectrum disorder DOID-0060041 human GSE25507 sample 1030	8/283	0.724954	1	0	0	0.852747	0.274284	RPS14;CAPZB;ITGB2-AS1;ACTN4;EEF2;NDEL1;ACTG1;ND4
Leukemia, Acute Megakaryocytic C0023462 mouse GSE2433 sample 95	9/318	0.731085	1	0	0	0.853752	0.267416	ATP6V1A;RNF11;ANXA1;CAPZB;FLNA;HMGA2;VCL;LIMS1;ACTG1
psoriasis DOID-8893 mouse GSE27628 sample 823	9/319	0.734421	1	0	0	0.851076	0.262704	AKAP12;SCARA3;OBSCN;ABLIM3;ITGB2;KCNJ16;TMCC2;LTBP2;TGM2
Schistosomiases C0036323 mouse GSE19525 sample 439	3/115	0.738803	1	0	0	0.786937	0.238225	ARHGAP22;ABCC3;KCNJ16
Intestinal polyposis UMLS CUI-C1257915 mouse GSE6078 sample 952	12/420	0.740296	1	0	0	0.861883	0.259173	PIGR;HADHA;GDA;MGST3;OGDH;UQCR11;P4HB;ACTN4;EZR;SDHA;NDUFV2;GAPDH
Gastrointestinal stromal tumor C0238198 human GSE15966 sample 76	6/220	0.741133	1	0	0	0.822707	0.246463	VCAN;LIMCH1;LPAL2;ASXL2;GRAMD3;EVPL
cystic fibrosis DOID-1485 mouse GSE3100 sample 1056	7/255	0.744965	1	0	0	0.828084	0.243803	ERRFI1;SNRK;HSPA4;IRS2;TOB2;ADAMTS9;MET
Huntington's disease DOID-12858 mouse GSE3621 sample 702	8/289	0.745896	1	0	0	0.835043	0.244808	MAPK10;RPS14;GDA;SLC39A10;KALRN;CALM2;PLCXD2;GAPDH
Infertility due to azoospermia C1321542 mouse GSE3676 sample 151	5/187	0.746615	1	0	0	0.806575	0.235686	AKAP12;ABCC3;CDC34;NCL;RANGAP1
Niemann-Pick disease Type C DOID-14504 mouse GSE39621 sample 469	8/290	0.749277	1	0	0	0.832163	0.240201	EEF1A1;ANLN;TBC1D9B;PLLP;HSPA4;ARL3;GNG7;CALM2
allergic contact dermatitis DOID-3042 human GSE6281 sample 925	10/357	0.749518	1	0	0	0.844984	0.24363	AKAP12;GNA13;ANLN;LIPC;IRS1;C2ORF88;PDGFC;SLC39A10;FAT4;FHIT
Schizophrenia C0036341 human GSE12654 sample 226	9/324	0.750679	1	0	0	0.837942	0.240302	APP;HADHA;CANX;CEP170B;MICAL2;EZR;CALM2;ACTB;ACTG1
pancreatic ductal adenocarcinoma DOID-3498 mouse GSE61412 sample 698	6/223	0.752666	1	0	0	0.811639	0.230614	THRB;CBS;CHAC1;LYPD6;SNTB1;SLC16A5
amyotrophic lateral sclerosis DOID-332 mouse GSE3343 sample 683	9/325	0.753847	1	0	0	0.835364	0.236045	PPTC7;PLLP;ITGB2;TSPAN4;HAS3;FLNA;OGT;PTPRF;SUMF1
Alcoholic Hepatitis DOID-12351 human GSE28619 sample 477	9/325	0.753847	1	0	0	0.835364	0.236045	AKAP12;ERRFI1;GOLGA4;SALL1;DUSP10;LURAP1L;IRS1;IRS2;FNIP2
Malignant Melanoma C0025202 human GSE4587 sample 326	7/258	0.755638	1	0	0	0.818455	0.229326	RPS14;NXN;RPL35;ADIRF;EEF2;PPL;ACTG1
Transplanted Heart Complication C0340529 mouse GSE582 sample 373	8/292	0.755943	1	0	0	0.826463	0.231236	SVIL;GOLGA4;UBE2B;OGDH;UQCR11;LMO7;NDUFV2;SPTBN1
Non-syndromic cleft lip and palate DOID-9296 human GSE42589 sample 618	12/426	0.757188	1	0	0	0.849744	0.236351	CDH6;STIL;VCAN;NFIB;CHAC1;CLSPN;GRAMD3;CALM2;SIPA1L3;MMADHC;KTN1;SYNE1
Sjogren's syndrome DOID-12894 human GSE23117 sample 888	11/393	0.757622	1	0	0	0.844339	0.234363	LGALS3BP;COX3;HDLBP;RPL35;COX2;CD9;P4HB;EEF2;UBA52;GAPDH;MGLL
multiple sclerosis DOID-2377 human GSE26484 sample 742	9/329	0.766238	1	0	0	0.825207	0.219722	MORF4L1;SLC38A1;ANXA1;NCL;CBX1;DHX15;DEK;GAPDH;ACTB
Carcinoma in situ of small intestine C0686083 mouse GSE422 sample 119	5/192	0.76683	1	0	0	0.785571	0.208561	PIGR;PPTC7;SHROOM3;H2AFV;EPN1
Hepatitis, Autoimmune C0241910 mouse GSE867 sample 230	6/227	0.767455	1	0	0	0.797337	0.211035	ABCC3;PIGR;RNF11;ZBTB20;EPN1;NFE2L2
Nephrolithiasis C0392525 mouse GSE10162 sample 187	9/330	0.769266	1	0	0	0.822707	0.215812	HADHA;MGST3;SARS;MALAT1;PPP2R3A;FNBP1L;TINAG;PTPRF;MGLL
autism spectrum disorder DOID-0060041 human GSE25507 sample 1026	9/330	0.769266	1	0	0	0.822707	0.215812	ATP6V1A;VCAN;UBN1;ITGB2;LITAF;GAPDH;ACTB;NDEL1;ACTG1
CML - Chronic myeloid leukemia C0023473 human GSE4170 sample 4	4/159	0.776872	1	0	0	0.758891	0.191604	SALL1;LMO7;PPP2R3A;EREG
bipolar disorder DOID-3312 human GSE46449 sample 572	11/401	0.779738	1	0	0	0.827494	0.205878	RBM25;CBS;CD9;MALAT1;FTX;ASAP2;PRSS23;FHIT;RAB11FIP3;MGLL;NKTR
lupus erythematosus DOID-8857 human GSE30153 sample 739	7/267	0.785722	1	0	0	0.790867	0.19072	MAST4;DOK7;SH3BP4;METTL21A;TNS3;ARHGAP24;MEGF9
colorectal cancer DOID-9256 human GSE32323 sample 552	9/336	0.786846	1	0	0	0.808016	0.193699	SPON1;SEMA6A;THRB;DMXL1;C2ORF88;EMP1;ROR1;VLDLR;NDEL1
Familial combined hyperlipidaemia C0020474 human GSE11393 sample 267	8/302	0.787389	1	0	0	0.799097	0.19101	OSBPL9;SLC38A1;SEC14L1;TBC1D5;NRIP1;EZR;NEAT1;LITAF
acute myocarditis DOID-3951 mouse GSE35182 sample 802	2/87	0.7886	1	0	0	0.693469	0.164696	SPOCK2;TRABD2B
idiopathic pulmonary fibrosis DOID-0050156 human GSE24206 sample 873	5/199	0.793044	1	0	0	0.757938	0.175748	CBS;EMP1;SLC7A11;TFPI;MAMLD1
Cardiomyopathy C0878544 human GSE1869 sample 79	7/270	0.795112	1	0	0	0.782079	0.179309	SIX5;MVP;NEAT1;THOP1;TRIOBP;TGM2;TGFBR2
acute myocardial infarction DOID-9408 human GSE48060 sample 510	9/339	0.795262	1	0	0	0.800865	0.183465	GOLGA4;PRKCH;FMNL2;C2ORF88;MYOF;FTX;ASAP2;PRSS23;FHIT
COPD - Chronic obstructive pulmonary disease C0024117 human GSE3212 sample 196	5/200	0.796594	1	0	0	0.754148	0.171501	SCNN1A;PLAUR;RPL35;UBA52;PTPRF
morbid obesity DOID-11981 human GSE48964 sample 583	8/306	0.799097	1	0	0	0.788651	0.176873	ABCC3;SPON1;CDCP1;THRB;NFIB;MIR21;EFCAB13;KIF15
Down Syndrome C0013080 mouse GSE1611 sample 105	8/306	0.799097	1	0	0	0.788651	0.176873	MBD3;EEF1A1;NCL;RRP1;DEK;AGRN;EEF2;ACTG1
glaucoma associated with systemic syndromes DOID-1686 mouse GSE26299 sample 491	9/341	0.800735	1	0	0	0.796168	0.176928	MAPK10;ABLIM3;HECW2;UQCR11;CDR2L;STK32A;SRGAP1;EPN1;RBMS3
pancreatitis DOID-4989 mouse GSE3644 sample 513	6/238	0.804721	1	0	0	0.760485	0.165223	RPS14;ARL3;AP3S1;P4HB;SEC62;UBA52
Malignant mesothelioma of pleura C0812413 human GSE2549 sample 118	5/203	0.806958	1	0	0	0.743003	0.159362	EEF1A1;ANXA1;HUWE1;ADIRF;TGFBR2
Obesity C0028754 mouse GSE4692 sample 319	8/309	0.807556	1	0	0	0.780994	0.166932	RPS14;CANX;OGDH;RPL35;EZR;SDHA;ACTB;ACTG1
Cystic Fibrosis C0010674 mouse GSE769 sample 428	7/275	0.810065	1	0	0	0.76786	0.161742	OGDH;HDLBP;EEF2;GAPDH;USF2;ACTB;SPTBN1
cardiomyopathy DOID-0050700 human GSE9128 sample 781	8/310	0.810315	1	0	0	0.778475	0.163738	RNF11;PRKCH;USP16;SMURF2;ZMIZ1;ZNHIT6;FAM208B;NUP153
melanoma DOID-1909 human GSE6887 sample 951	10/379	0.810459	1	0	0	0.795934	0.167269	ABCC3;DOCK4;NCEH1;PDGFC;MYOF;EMP1;SIRPA;MGLL;EREG;LIMS1
polycystic ovary syndrome DOID-11612 human GSE48301 sample 559	11/414	0.812557	1	0	0	0.80151	0.166369	SEC14L1;PLEKHB2;SCNN1A;SLC2A1;UQCR11;EEF2;GAPDH;BICC1;ACTB;ACTG1;TGM2
Hypertrophy, Left Ventricular C0149721 mouse GSE2459 sample 382	8/311	0.813044	1	0	0	0.775972	0.160603	RGS3;SIX5;U2AF2;MGST3;HMGA2;UQCR11;LMO7;NDUFV2
Huntington's disease DOID-12858 human GSE3248 sample 724	8/312	0.815743	1	0	0	0.773485	0.157525	INPP4A;SVIL;SNRK;FNBP1;SPOCK2;CALM2;SPTAN1;SPTBN2
nemaline myopathy DOID-3191 mouse GSE3384 sample 976	12/450	0.817182	1	0	0	0.804424	0.162408	ITGB1;EEF1A1;ABCC3;PIGR;MORF4L1;ERRFI1;B4GALT1;RDX;OGDH;EMP1;SPTBN1;ACTG1
smoldering myeloma DOID-9551 human GSE47552 sample 562	7/278	0.818626	1	0	0	0.759573	0.152012	AKAP12;B4GALT1;CTR9;ASXL2;TRIP11;CD9;FLNB
swine influenza DOID-0050211 human GSE48466 sample 498	8/315	0.82366	1	0	0	0.766118	0.148625	ALCAM;ANXA1;RPL35;H2AFV;COX1;EEF2;UBA52;GAPDH
ulcerative colitis DOID-8577 human GSE38713 sample 810	9/350	0.824021	1	0	0	0.775695	0.150143	NCEH1;SHROOM2;ADIRF;VLDLR;PDE6A;PRSS23;TRHDE;EREG;EPHA2
Type 2 diabetes mellitus C0011860 mouse GSE2899 sample 299	6/245	0.825913	1	0	0	0.738757	0.141299	EEF1A1;RGS3;SUMO1;ARHGAP39;CALM2;USF2
H1N1 DOID-0050211 human GSE27131 sample 514	4/173	0.829382	1	0	0	0.697478	0.13048	PRKCH;SMAD3;FAM102A;SPOCK2
Diabetes and Obesity DOID-9970 mouse GSE54917 sample 807	7/282	0.829571	1	0	0	0.748799	0.139911	ABTB2;MUS81;TANGO6;EMP1;PLS3;ACTG1;PTPN3
Osteoarthritis C0029408 human GSE16464 sample 199	7/283	0.832224	1	0	0	0.746153	0.137034	AKAP12;RPS6KA2;COX2;TRIB3;CHAC1;EEF2;UBA52
obesity DOID-9970 mouse GSE55389 sample 612	4/174	0.832706	1	0	0	0.693469	0.126956	ANXA1;NOL8;MALAT1;ANP32B
Down syndrome DOID-14250 human GSE19681 sample 1066	8/320	0.836268	1	0	0	0.754148	0.134846	MORF4L1;LASP1;DHX15;RPL35;UBA52;CALM2;SKP1;ACTG1
Huntington's disease DOID-12858 mouse GSE3621 sample 704	9/356	0.83835	1	0	0	0.762621	0.134465	APP;SNRK;SLC39A10;NEAT1;CALM2;PLCXD2;SPTBN2;ACTG1;SYNE1
allergic contact dermatitis DOID-3042 human GSE6281 sample 928	8/321	0.838703	1	0	0	0.751798	0.13224	IRS1;SLC39A10;FAT4;ASAP2;FNBP1L;TFPI;OXR1;EREG
Asthma DOID-2841 human GSE43696 sample 634	8/321	0.838703	1	0	0	0.751798	0.13224	TOP2A;ANLN;SH3TC2;ZNF282;TNFAIP2;EMP1;NEAT1;TFPI
Malignant Melanoma C0025202 human GSE3189 sample 117	6/250	0.8399	1	0	0	0.723982	0.126314	EEF1A1;NFIB;NXN;HUWE1;ADIRF;PPL
facioscapulohumeral muscular dystrophy DOID-11727 human GSE36398 sample 672	7/286	0.839988	1	0	0	0.738327	0.12874	TMEM245;BDNF;C12ORF75;GRAMD3;NT5C2;BICD1;TRHDE-AS1
nasopharynx carcinoma DOID-9261 human GSE12452 sample 776	10/392	0.84087	1	0	0	0.769539	0.133375	PIGR;SCEL;ANXA1;GDA;ADIRF;ARHGAP18;PRSS23;PPL;MGLL;EPHA2
psoriasis DOID-8893 human GSE14905 sample 754	8/322	0.841109	1	0	0	0.749464	0.129682	LGALS3BP;ERRFI1;SPON1;ANXA1;DUSP10;MLLT3;RNF111;EPHA2
systemic lupus erythematosus DOID-9074 human GSE55447 sample 1078	9/358	0.842919	1	0	0	0.758361	0.129592	FAM160A1;RXRA;MTHFD1L;KCNQ1OT1;NEK6;RDX;PHIP;ELAVL1;SMIM12
cystic fibrosis DOID-1485 mouse GSE769 sample 1058	7/288	0.845004	1	0	0	0.733199	0.123481	ITGB1;SIX5;EMP1;GAPDH;USF2;ACTB;SPTBN1
ulcerative colitis DOID-8577 human GSE11223 sample 589	6/252	0.845236	1	0	0	0.718236	0.120764	EHF;SALL1;ABLIM2;ADIRF;CPEB3;SPTBN1
Idiosyncratic drug effect C0277580 rat GSE2825 sample 304	7/289	0.847464	1	0	0	0.730662	0.12093	PTPRD;ANKRD10;SLIRP;RREB1;PTPRF;VGLL4;ACTG1
progressive myoclonus epilepsy DOID-891 mouse GSE47516 sample 516	3/141	0.850597	1	0	0	0.641828	0.103859	LGALS3BP;NMNAT2;MAMLD1
Nemaline Myopathy C0206157 mouse GSE3384 sample 180	4/181	0.854491	1	0	0	0.66665	0.10483	APP;UBE2B;ITSN1;CALM2
Intestinal metaplasia of gastric mucosa C0267187 human GSE2669 sample 349	7/292	0.854657	1	0	0	0.723155	0.113576	CLIP2;CBS;KCNQ1;DHX38;ME3;EGFR;PDE9A
large cell neuroendocrine carcinoma DOID-0050872 human GSE51852 sample 733	7/294	0.859297	1	0	0	0.718236	0.108914	PIGR;SCEL;ANXA1;NXN;KCNQ1;EMP1;EREG
Huntington's disease DOID-12858 mouse GSE19780 sample 527	7/294	0.859297	1	0	0	0.718236	0.108914	ATXN1;MTHFD1L;GNG7;NOL8;IRS2;TOB2;MPP7
atherosclerosis DOID-1936 mouse GSE19286 sample 906	6/259	0.86278	1	0	0	0.698824	0.103143	AKAP12;RPS14;IRS1;MALAT1;UBA52;ACTB
precursor B lymphoblastic lymphoma/leukemia DOID-7061 human GSE29639 sample 803	4/184	0.863063	1	0	0	0.655781	0.0965749	PTPRD;SEMA6A;FHIT;MCU
allergic contact dermatitis DOID-3042 human GSE6281 sample 926	9/368	0.864261	1	0	0	0.737753	0.107624	GNA13;ANLN;PHF12;ANP32E;SLC39A10;FAT4;DEK;C12ORF75;EREG
mental retardation DOID-1059 human GSE6575 sample 1047	8/333	0.865742	1	0	0	0.724707	0.10448	MYO1E;ZMAT2;ZC3H11A;IL3RA;FAM3C;SLIRP;ZBED6;CREB5
diffuse large B-cell lymphoma DOID-0050745 mouse GSE6136 sample 684	11/440	0.867053	1	0	0	0.754148	0.107583	OSER1;MORF4L1;SUMO1;DHX15;RPL35;DDX54;ANP32B;EEF2;EZR;NDUFV2;CALM2
pancreatic cancer DOID-1793 human GSE16515 sample 475	5/224	0.868178	1	0	0	0.673346	0.095183	EEF1A1;RPL35;ADIRF;MALAT1;P4HB
osteoarthritis DOID-8398 human GSE16464 sample 751	9/371	0.87019	1	0	0	0.731788	0.101751	MORF4L1;RNF11;NXN;COX3;SARS;TRIB3;CHAC1;EEF2;UBA52
ulcerative colitis DOID-8577 human GSE9452 sample 454	4/187	0.8712	1	0	0	0.64526	0.0889705	SPON1;THRB;ADIRF;VLDLR
MS (Multiple Sclerosis) C0026769 human GSE10064 sample 377	8/336	0.871895	1	0	0	0.718236	0.0984606	RPS14;EIF5B;PRKCH;ARHGEF16;RPL35;SNRPF;EEF2;ACTB
psoriasis DOID-8893 human GSE32407 sample 836	6/263	0.872046	1	0	0	0.688196	0.0942227	ALDH1A2;NEDD4L;ERC1;PDE6A;FHIT;WDR33
sickle-cell anemia DOID-10923 human GSE16728 sample 506	3/148	0.872492	1	0	0	0.611471	0.0834056	IL3RA;HSF2BP;COX1
Acute pancreatitis C0001339 mouse GSE3644 sample 376	4/188	0.873819	1	0	0	0.641828	0.0865712	RPS14;AP3S1;P4HB;SEC62
idiopathic pulmonary fibrosis DOID-0050156 human GSE24206 sample 872	6/267	0.880785	1	0	0	0.677886	0.0860521	BDNF;CBS;IRS2;THSD7A;MAMLD1;TRHDE
Type 2 diabetes mellitus C0011860 mouse GSE2899 sample 45	6/268	0.882889	1	0	0	0.675356	0.0841193	EEF1A1;ABCC3;MGST3;UQCR11;MLLT3;ACTG1
atopic dermatitis skin DOID-3310 human GSE32924 sample 630	6/269	0.884962	1	0	0	0.672846	0.0822285	UHRF1;MVP;TNC;KIF20A;MKI67;BRCA2
systemic lupus erythematosus DOID-9074 mouse GSE2376 sample 633	6/269	0.884962	1	0	0	0.672846	0.0822285	OSER1;RPS14;SARS;MALAT1;EZR;ACTB
schizophrenia DOID-5419 human GSE12679 sample 769	10/415	0.88523	1	0	0	0.726889	0.0886131	RNF11;USP16;CBX1;DLEU1;DHX15;UBXN7;NOL8;SLIRP;FNBP1L;MMADHC
idiopathic pulmonary fibrosis DOID-0050156 human GSE24206 sample 867	7/307	0.886593	1	0	0	0.687822	0.0827924	ERRFI1;CBS;RPS6KA2;EMP1;IRS2;SLC7A11;MAMLD1
Alzheimer's disease DOID-10652 human GSE36980 sample 519	9/380	0.886727	1	0	0	0.714456	0.0858904	PPP1R37;BDNF;DLEU1;PPL;MET;ST6GALNAC5;SPTBN2;OSBPL10;PTPN3
cerebral palsy DOID-1969 human GSE11686 sample 913	7/308	0.888496	1	0	0	0.685589	0.0810537	RPS14;HADHA;SLC38A1;SDHA;NDUFV2;EEF2;ACTB
pulmonary tuberculosis DOID-2957 mouse GSE48027 sample 832	2/114	0.895498	1	0	0	0.529227	0.0584133	MYH10;CALM2
bipolar disorder DOID-3312 human GSE46449 sample 570	7/312	0.895842	1	0	0	0.676799	0.0744419	ABCC4;HECW2;PDGFC;IL3RA;ASAP2;ARHGAP6;MGLL
Huntington's disease DOID-12858 mouse GSE9038 sample 717	7/312	0.895842	1	0	0	0.676799	0.0744419	SPEN;ZC3H11A;TSPAN4;DAB2IP;FLNB;STK32A;NR2F6
nasopharynx carcinoma DOID-9261 human GSE12452 sample 778	9/386	0.896758	1	0	0	0.70335	0.0766436	BCAR3;SCEL;ALCAM;GDA;ITGB2-AS1;PRSS23;PPL;MGLL;EPHA2
hepatocellular carcinoma DOID-684 human GSE39791 sample 663	9/386	0.896758	1	0	0	0.70335	0.0766436	LGALS3BP;PIGR;MAST4;LIMCH1;CBS;ADIRF;CDK12;CPEB3;EZR
anaplastic thyroid carcinoma UMLS CUI-C0238461 human GSE65144 sample 654	6/276	0.898622	1	0	0	0.655781	0.070098	EEF1A1;COX3;KCNJ16;CD9;SEC62;SKP1
Ischemic stroke UMLS CUI-C0948008 human GSE22255 sample 856	6/277	0.900456	1	0	0	0.653413	0.0685131	NEK8;LGALS3BP;CRIM1;MALAT1;FTX;NKTR
schizophrenia DOID-5419 human GSE12679 sample 767	7/315	0.90108	1	0	0	0.670354	0.0698252	ZMAT2;CRIM1;UBXN7;PLS3;RBCK1;NEAT1;MCU
Papillary Carcinoma of the Thyroid C0238463 human GSE3467 sample 397	4/200	0.901815	1	0	0	0.603318	0.0623507	IRS1;GLIS3;VLDLR;ARHGAP24
asthma DOID-2841 human GSE27011 sample 566	6/278	0.902261	1	0	0	0.651063	0.0669628	DOCK4;IL3RA;ERF;PLAUR;CD9;FNBP1L
severe asthma 2841 human GSE43696 sample 467	8/353	0.902539	1	0	0	0.683647	0.0701037	FAM160A1;SVIL;SPON1;TNFAIP2;KCNJ16;THSD7A;KALRN;SNTB1
systemic juvenile idiopathic arthritis (sJIA) (subgroup-extended oligo) DOID-848 human GSE21521 sample 576	5/240	0.90305	1	0	0	0.628457	0.0640887	NCEH1;DUSP10;NEBL;PRSS23;ARHGAP24
systemic lupus erythematosus DOID-9074 human GSE10325 sample 693	5/240	0.90305	1	0	0	0.628457	0.0640887	RPS14;LASP1;RPL35;SEC62;OSBPL10
Dystonia C0393593 human GSE3064 sample 329	7/317	0.904445	1	0	0	0.666124	0.066901	CA12;ATP6V1A;ATXN1;DLC1;EEF2;CALM2;SPTAN1
colon cancer DOID-219 mouse GSE63032 sample 662	7/317	0.904445	1	0	0	0.666124	0.066901	DOCK4;DUSP10;MICAL2;PPP2R3A;CALM2;SNTB1;DCBLD2
systemic lupus erythematosus DOID-9074 human GSE55447 sample 1073	7/318	0.906092	1	0	0	0.66403	0.0654832	MIR423;ZFHX2;ZMIZ1;TOP1;SHB;ELAVL1;OXR1
Huntington's disease DOID-12858 mouse GSE26001 sample 720	3/164	0.912195	1	0	0	0.551815	0.0507128	COBL;BAHCC1;PDE9A
nasopharynx carcinoma DOID-9261 human GSE12452 sample 777	10/433	0.912421	1	0	0	0.696672	0.0638525	PIGR;SCEL;ALCAM;ANXA1;GDA;ADIRF;PRSS23;PPL;MGLL;EPHA2
Hepatic lipidosis C0015695 mouse GSE5538 sample 10	6/284	0.912511	1	0	0	0.637308	0.0583489	LGALS3BP;SPTAN1;ACTB;PTPRF;ACTG1;TGM2
cystic fibrosis DOID-1485 mouse GSE33319 sample 1048	7/324	0.915468	1	0	0	0.651733	0.0575613	PIGR;GALE;PLEKHB2;EMP1;EGFR;TGM2;RBMS3
Familial hypophosphataemic rickets C0733682 mouse GSE868 sample 172	7/324	0.915468	1	0	0	0.651733	0.0575613	HSPA9;ABCC3;APP;UQCR11;GAPDH;SPTBN1;EPN1
Carcinoma, Hepatocellular C0019204 human GSE3632 sample 125	5/247	0.915592	1	0	0	0.610646	0.0538494	PPTC7;CCDC115;TBC1D5;TNC;ADAM10
glomerulosclerosis DOID-0050851 mouse GSE20844 sample 492	8/362	0.916093	1	0	0	0.66665	0.0584235	PIGR;CLUH;KCNJ16;ME3;CLDN16;TINAG;MET;TRABD2B
autism spectrum disorder DOID-0060041 human GSE63524 sample 1035	7/325	0.916949	1	0	0	0.649727	0.0563335	VCAN;SEC14L1;NCEH1;SMAD3;ADIRF;SHROOM3;ARHGAP6
pancreatic invasive intraductal papillary-mucinous carcinoma DOID-8150 human GSE19650 sample 610	5/248	0.917262	1	0	0	0.608184	0.0525238	EEF1A1;VCAN;ANP32B;DEK;MYH10
multiple myeloma DOID-9538 mouse GSE6980 sample 955	7/327	0.919845	1	0	0	0.645753	0.0539525	MACF1;FAM111A;FLNA;ITPR3;EZR;SSH2;UBA52
asthma DOID-2841 human GSE43696 sample 827	8/365	0.920237	1	0	0	0.661171	0.0549589	FAM160A1;SPON1;SH3TC2;TNFAIP2;PLAUR;EMP1;NEAT1;TFPI
glaucoma associated with systemic syndromes DOID-1686 mouse GSE26299 sample 489	5/250	0.920516	1	0	0	0.603318	0.0499675	TMEM245;DDX27;MLLT3;NKTR;PLEC
inclusion body myositis DOID-3429 human GSE48280 sample 706	3/169	0.922077	1	0	0	0.53549	0.0434423	ABTB2;IRS1;DDX23
asthma DOID-2841 human GSE43696 sample 828	8/369	0.925489	1	0	0	0.654004	0.0506416	FAM160A1;SVIL;SPON1;SH3TC2;HAS3;TNFAIP2;PLAUR;KALRN
psoriasis DOID-8893 mouse GSE27628 sample 822	5/254	0.926685	1	0	0	0.593817	0.0452141	SPON1;HAS3;TNC;PLAUR;SLC7A11
Bacterial Infection C0004623 human GSE3026 sample 322	4/215	0.929005	1	0	0	0.561226	0.0413294	EEF1A1;RPS14;RPL35;LITAF
colon cancer DOID-219 human GSE34299 sample 502	6/296	0.930243	1	0	0	0.611471	0.0442151	NFIB;GDA;BTBD16;NHS;TRIB3;ROR1
ulcerative colitis DOID-8577 human GSE11223 sample 593	6/297	0.931567	1	0	0	0.609412	0.0431995	ABCC4;LIPC;ABLIM2;PLEKHB2;IL3RA;KIAA0319L
renal cell carcinoma DOID-4450 human GSE38424 sample 664	6/298	0.932869	1	0	0	0.607367	0.0422064	ABCC3;MGST3;PRKCA;NUCKS1;PLOD1;RAI14
low-grade serous ovarian carcinomas DOID-0050933 human GSE56443 sample 755	5/259	0.933797	1	0	0	0.582354	0.0398892	ALDH1A2;SARS;SLC7A11;TOB2;SYNE1
ulcerative colitis DOID-8577 human GSE9452 sample 923	3/176	0.934209	1	0	0	0.514192	0.0349935	SPON1;ADIRF;VLDLR
Atherosclerosis C0004153 mouse GSE363 sample 193	6/301	0.936643	1	0	0	0.601314	0.0393575	EEF1A1;ERRFI1;LIPC;B4GALT1;UQCR11;EGFR
Breast Cancer C0006142 mouse GSE2528 sample 28	6/301	0.936643	1	0	0	0.601314	0.0393575	EEF1A1;HSPA9;OGDH;EMP1;SPTBN1;MGLL
pulmonary sarcoidosis DOID-13406 human GSE19976 sample 765	7/342	0.938906	1	0	0	0.617431	0.0389229	TOP2A;SPON1;GDA;ITGB2;TNFAIP2;SLC7A11;MKI67
multiple sclerosis DOID-2377 human GSE23832 sample 746	5/263	0.939035	1	0	0	0.573496	0.0360743	VCAN;IL3RA;C12ORF75;LINC00299;SYNE1
Carcinoma, Hepatocellular C0019204 human GSE6764 sample 407	6/303	0.939054	1	0	0	0.597345	0.0375623	MORF4L1;LIPC;PLS3;P4HB;NDUFV2;MMADHC
autistic disorder DOID-12849 human GSE6575 sample 1043	1/83	0.939427	1	0	0	0.363445	0.0227098	CKMT2-AS1
type 2 diabetes mellitus DOID-9352 human GSE23343 sample 893	7/344	0.941119	1	0	0	0.613841	0.0372514	KIRREL3;KCNQ1OT1;ADIRF;B3GALT5;HSPG2;PDE9A;SPTBN2
Alzheimer's disease DOID-10652 human GSE36980 sample 521	3/181	0.941782	1	0	0	0.499988	0.0299902	VLDLR;PPL;MET
Type 2 diabetes mellitus C0011860 mouse GSE642 sample 320	6/306	0.942517	1	0	0	0.591488	0.0350167	HSPA9;PIGR;U2AF2;TOP1;SLIRP;EPN1
pancreatic cancer DOID-1793 mouse GSE47811 sample 449	5/266	0.942716	1	0	0	0.567028	0.0334488	GON4L;PODXL2;DMXL1;TRHDE;UACA
Preeclampsia C0032914 human GSE4707 sample 352	4/225	0.943149	1	0	0	0.536283	0.0313889	SH3TC2;UBN2;ANKRD10;NEAT1
psoriasis DOID-8893 mouse GSE27628 sample 824	6/307	0.943632	1	0	0	0.589562	0.0342057	ABLIM3;CBS;KCNJ16;LTBP2;PRSS23;MCU
glaucoma associated with systemic syndromes DOID-1686 mouse GSE26299 sample 490	5/268	0.945058	1	0	0	0.562797	0.0318029	SH2D4A;BRCA2;STK32A;MLLT3;SRGAP1
psoriasis DOID-8893 human GSE13355 sample 837	6/309	0.945804	1	0	0	0.585746	0.0326378	VCAN;C5ORF17;PDGFC;C12ORF75;DBN1;SPTBN2
Glaucoma C0017601 mouse GSE3554 sample 260	6/310	0.946861	1	0	0	0.583856	0.0318801	CDC34;TNIP1;PDGFC;CEP131;LONP1;SRGAP1
idiopathic pulmonary fibrosis DOID-0050156 human GSE24206 sample 868	5/271	0.948409	1	0	0	0.556567	0.029481	ERRFI1;BDNF;CBS;TFPI;MAMLD1
Down Syndrome C0013080 human GSE5390 sample 277	2/140	0.948826	1	0	0	0.430942	0.0226371	UQCR11;HIVEP2
systemic lupus erythematosus DOID-9074 human GSE55447 sample 1074	6/313	0.949924	1	0	0	0.57826	0.0297072	RAI1;RXRA;PPTC7;ZMYND8;PCDHA9;SUMF1
stomach cancer DOID-10534 human GSE49515 sample 553	7/353	0.950224	1	0	0	0.598191	0.0305425	C2ORF88;PLAUR;ARHGAP24;EREG;NDEL1;FAM129B;CREB5
Synovial sarcoma C0039101 mouse GSE6461 sample 22	5/273	0.950539	1	0	0	0.552489	0.0280256	CDC34;UBE2B;MGST3;CHAC1;NDUFV2
Overexertion C0161750 human GSE3606 sample 286	6/314	0.950909	1	0	0	0.576419	0.0290152	MORF4L1;NCL;RPL35;FLNA;NUP153;DEK
neurofibromatosis DOID-8712 mouse GSE29343 sample 670	2/142	0.951616	1	0	0	0.424872	0.021071	DUSP10;CHAC1
schizophrenia DOID-5419 human GSE27383 sample 548	6/315	0.951876	1	0	0	0.574589	0.0283387	PRKCH;DUSP10;METTL21A;RANGAP1;PRSS23;MAD1L1
systemic juvenile idiopathic arthritis (sJIA) DOID-848 human GSE21521 sample 574	4/233	0.95256	1	0	0	0.51787	0.0251697	NHS;SH3BP4;C12ORF75;PRSS23
epidermolysis bullosa simplex DOID-4644 human GSE28315 sample 711	7/356	0.952967	1	0	0	0.59315	0.0285753	SPON1;VCAN;PLCB4;FAT4;TNS3;PRSS23;NAALADL2
sarcoidosis DOID-11335 human GSE19314 sample 708	6/317	0.95376	1	0	0	0.570964	0.0270311	MORC4;ABLIM3;SPOCK2;KIAA1671;CTDSPL;MSANTD3
Asthma C0004096 human GSE4302 sample 318	7/357	0.95385	1	0	0	0.591488	0.0279469	BCAR3;NCEH1;TNFAIP2;SLC39A10;VLDLR;GRAMD3;TNS3
neurofibromatosis DOID-8712 mouse GSE1482 sample 666	6/318	0.954677	1	0	0	0.569168	0.0263993	MACF1;NCL;HIVEP2;RANGAP1;SPTAN1;ACTB
Cardiac Hypertrophy C1383860 mouse GSE5500 sample 5	4/235	0.954677	1	0	0	0.513462	0.0238153	NEK8;KIRREL;SIN3A;ANO10
idiopathic urticaria DOID-1555 human GSE57178 sample 815	3/192	0.955685	1	0	0	0.471342	0.0213645	ZBTB20;OXR1;SYNE1
multiple myeloma DOID-9538 human GSE6691 sample 787	2/146	0.956765	1	0	0	0.413232	0.0182636	PIGR;FNBP1
Streptococcal tonsillitis C0275804 mouse GSE11494 sample 263	8/400	0.956953	1	0	0	0.603318	0.0265465	EEF1A1;RDX;CANX;DHX15;RRBP1;AP3S1;P4HB;CALM2
cystic fibrosis DOID-1485 mouse GSE3100 sample 1055	5/281	0.958283	1	0	0	0.53676	0.0228724	KCNQ1OT1;MALAT1;NEAT1;TINAG;MET
Hyperlipidemia C0020473 rat GSE3512 sample 38	6/323	0.959019	1	0	0	0.560358	0.023448	CBS;MGST3;P4HB;SDHA;UBA52;GAPDH
Wolfram syndrome UMLS CUI-C0043207 mouse GSE15293 sample 694	6/324	0.95984	1	0	0	0.558628	0.0228972	LIPC;TNC;FAM208A;SHB;STK32A;FNIP2
Atherosclerosis C0004153 mouse GSE1560 sample 77	3/197	0.960919	1	0	0	0.459379	0.0183132	STAG1;ASPH;ASAP1
Cardiomyopathy, Dilated C0007193 human GSE3586 sample 323	2/150	0.961388	1	0	0	0.402212	0.015838	MALAT1;CALM2
Lewy body dementia DOID-12217 human GSE49036 sample 1067	4/242	0.961422	1	0	0	0.49861	0.0196164	BDNF;C5ORF17;ANO10;PRSS23
Duchenne muscular dystrophy (DMD) C0013264 mouse GSE1026 sample 72	5/287	0.963346	1	0	0	0.525539	0.0196251	RNF11;UBE2B;RPS6KA2;CD9;LMO7
systemic lupus erythematosus DOID-9074 human GSE55447 sample 1077	6/329	0.963729	1	0	0	0.550138	0.0203251	ZFHX2;COBLL1;SPOCK2;NF1;SH3BP4;CCDC102A
Huntington's disease DOID-12858 mouse GSE9038 sample 718	7/371	0.96475	1	0	0	0.569168	0.0204251	ATXN1;MTHFD1L;KCNJ16;FLNB;IRS2;FTX;TRHDE
Acne C0702166 human GSE10432 sample 297	5/292	0.967127	1	0	0	0.51654	0.0172657	ABLIM3;NCBP2;MGST3;GCNT1;ROR1
nasopharynx carcinoma DOID-9261 human GSE12452 sample 774	7/375	0.967404	1	0	0	0.563097	0.0186604	PIGR;SCEL;ANXA1;ADIRF;PPL;PRSS23;MGLL
melanoma DOID-1909 human GSE6887 sample 950	5/293	0.967838	1	0	0	0.514777	0.0168281	ABCC3;MYO1E;BRCA2;PRSS23;SLC16A5
nephronophthisis DOID-12712 mouse GSE6113 sample 942	5/293	0.967838	1	0	0	0.514777	0.0168281	HSPA9;SMS;SDHA;NDUFV2;TINAG
Malignant tumor of pancreas C0346647 human GSE14245 sample 242	3/205	0.968103	1	0	0	0.441452	0.0143106	DLEU1;PPL;UACA
systemic lupus erythematosus DOID-9074 human GSE61635 sample 816	5/294	0.968536	1	0	0	0.513026	0.0164013	GOLGA4;SPOCK2;MICAL2;FTX;TGM2
psoriatic arthritis DOID-9008 human GSE61281 sample 696	4/251	0.968729	1	0	0	0.480732	0.0152732	RABGAP1;KCNIP1;UBXN7;EFCAB13
schizophrenia DOID-5419 human GSE62191 sample 545	6/337	0.969241	1	0	0	0.537079	0.0167792	BDNF;DLEU1;ASAP2;METTL21A;LYPD6;TRIOBP
psoriasis DOID-8893 mouse GSE27628 sample 819	6/337	0.969241	1	0	0	0.537079	0.0167792	SCARA3;ABLIM3;IRS1;CBS;LMO7;MGLL
Waldenstrom Macroglobulinemia UMLS CUI-C0024419 human GSE6691 sample 785	3/207	0.969693	1	0	0	0.437187	0.0134547	WSCD1;ABLIM3;LTBP2
Carcinoma, Hepatocellular C0019204 mouse GSE2127 sample 300	5/298	0.971188	1	0	0	0.506139	0.014797	PIGR;LIPC;CBS;UQCR11;SDHA
cystic fibrosis DOID-1485 mouse GSE3100 sample 1057	4/256	0.972209	1	0	0	0.471342	0.0132847	ERRFI1;PIGR;HECW2;MET
Rhinovirus infection C0276447 human GSE11348 sample 324	4/256	0.972209	1	0	0	0.471342	0.0132847	CD9;PPL;ACTG1;ND4
Alzheimer's disease DOID-10652 human GSE36980 sample 523	4/259	0.974119	1	0	0	0.465883	0.0122162	WSCD1;MGST3;VLDLR;MET
ulcerative colitis DOID-8577 human GSE11223 sample 587	3/214	0.974689	1	0	0	0.422887	0.0108414	SETD1A;BAHCC1;EPHA2
mental retardation DOID-1059 human GSE6575 sample 1044	2/165	0.974846	1	0	0	0.365647	0.00931513	MAP2K3;RARA
type 2 diabetes mellitus DOID-9352 human GSE23343 sample 895	6/347	0.975049	1	0	0	0.521601	0.0131796	CLIP2;LOC101929705;SETD1A;DLEU1;EGFR;KIF15
pulmonary sarcoidosis DOID-13406 human GSE19976 sample 764	4/261	0.975324	1	0	0	0.462313	0.0115512	SCEL;PLCB4;LIMCH1;SYNE1
schizophrenia DOID-5419 human GSE12679 sample 543	5/305	0.975337	1	0	0	0.494523	0.0123493	ERRFI1;USP16;DLEU1;MALAT1;CCAR1
schizophrenia DOID-5419 human GSE12679 sample 768	3/216	0.975966	1	0	0	0.418971	0.0101924	PCDHA1;MALAT1;SUMF1
asthma DOID-2841 human GSE27011 sample 567	4/263	0.976476	1	0	0	0.458797	0.0109219	MYOF;CTDSPL;CD9;ASAP2
ulcerative colitis DOID-8577 human GSE22619 sample 710	4/264	0.977032	1	0	0	0.457059	0.01062	DLEU1;DHX38;ADIRF;EPHB2
nephrosclerosis DOID-11664 human GSE20602 sample 905	3/218	0.977182	1	0	0	0.415127	0.00958201	COBL;TRHDE;ARHGAP24
pancreatic ductal adenocarcinoma DOID-3498 human GSE15471 sample 604	1/113	0.978078	1	0	0	0.266955	0.00591741	TRHDE
bipolar disorder DOID-3312 human GSE12679 sample 770	3/220	0.978339	1	0	0	0.411353	0.00900805	MALAT1;FTX;PPL
Huntington's disease DOID-12858 human GSE8762 sample 930	2/171	0.978847	1	0	0	0.352818	0.00754309	RPL35;THOP1
Down Syndrome C0013080 human GSE10758 sample 310	3/224	0.980488	1	0	0	0.404008	0.00796076	SMURF2;KCNJ16;PRSS23
atherosclerosis DOID-1936 human GSE43292 sample 508	4/271	0.980596	1	0	0	0.445253	0.00872451	ERRFI1;BDNF;TNC;C12ORF75
dengue disease DOID-12205 human GSE51808 sample 556	3/225	0.980993	1	0	0	0.402212	0.00771844	MAP2K3;MICAL2;CREB5
hepatocellular carcinoma DOID-684 human GSE60502 sample 656	5/317	0.981182	1	0	0	0.475803	0.00903902	KCNJ16;CPEB3;PPL;EPHA2;SYNE1
osteoarthritis DOID-8398 rat GSE8077 sample 943	3/226	0.981485	1	0	0	0.400432	0.00748347	BTD;PKP3;EPN1
dengue hemorrhagic fever DOID-12206 human GSE51808 sample 557	3/226	0.981485	1	0	0	0.400432	0.00748347	MAP2K3;MICAL2;IRS2
Huntington's disease DOID-12858 mouse GSE26001 sample 719	5/319	0.98202	1	0	0	0.47282	0.00857877	ARVCF;ANXA1;ITGA3;CHAC1;NMNAT2
basal cell carcinoma DOID-2513 mouse GSE58894 sample 730	5/320	0.982425	1	0	0	0.471342	0.00835729	OBSCN;LIMCH1;PLLP;KCNJ16;VLDLR
bipolar disorder DOID-3312 human GSE12679 sample 544	4/276	0.982815	1	0	0	0.437187	0.00757832	SAP30BP;USP16;GDA;EEF2
Type 1 diabetes mellitus C0011854 mouse GSE11 sample 173	5/321	0.982823	1	0	0	0.469874	0.00814137	LGALS3BP;HADHA;HNF1B;PDE9A;CDK5RAP2
Down syndrome DOID-14250 human GSE35561 sample 1062	3/229	0.982889	1	0	0	0.395187	0.00682037	PRKCH;GDA;HIVEP2
Lewy body dementia DOID-12217 human GSE49036 sample 1069	4/277	0.983229	1	0	0	0.435609	0.00736751	EME2;SUSD1;PLCXD2;SPTBN2
autistic disorder DOID-12849 human GSE6575 sample 1045	4/280	0.984415	1	0	0	0.430942	0.00676907	ZMAT2;ZC3H11A;MIR21;FAM3C
Schizophrenia DOID-1574 human GSE12679 sample 451	4/281	0.984792	1	0	0	0.429408	0.00658041	ZMAT2;DLEU1;CRIM1;UBXN7
asthma DOID-2841 human GSE31773 sample 714	5/328	0.985375	1	0	0	0.459846	0.00677494	VCAN;ABLIM3;C2ORF88;ARHGEF16;EVPL
progressive myoclonus epilepsy DOID-891 mouse GSE47516 sample 517	2/185	0.985932	1	0	0	0.326118	0.00462033	ALDH1A2;LTBP2
Huntington's disease DOID-12858 human GSE8762 sample 931	4/285	0.986217	1	0	0	0.423381	0.00587608	SMS;C12ORF75;PRSS23;SUMF1
asthma DOID-2841 human GSE31773 sample 712	4/286	0.986553	1	0	0	0.421901	0.00571191	VCAN;C5ORF17;COX3;PRSS23
non-systemic juvenile idiopathic arthritis (sJIA) (subgroup-RF+ polyarthritis) DOID-848 human GSE21521 sample 579	3/241	0.987553	1	0	0	0.375509	0.00470327	FGD6;PRSS23;MAD1L1
Hutchinson-Gilford progeria syndrome UMLS CUI-C0033300 mouse GSE32609 sample 984	5/335	0.987567	1	0	0	0.450238	0.00563292	HADHA;SNRK;LIPC;MGLL;NFE2L2
Pompe disease, infantile-onset form UMLS CUI-C0342751 human GSE38680 sample 870	3/242	0.987881	1	0	0	0.373958	0.00455965	DUSP10;GDA;C12ORF75
Cystic Fibrosis C0010674 mouse GSE3100 sample 138	2/191	0.988205	1	0	0	0.315873	0.00374776	TINAG;MET
Alzheimer's disease DOID-10652 human GSE36980 sample 524	4/292	0.98841	1	0	0	0.413232	0.00481742	CA12;BDNF;TNC;MET
Down syndrome DOID-14250 human GSE42956 sample 1061	4/294	0.988973	1	0	0	0.410421	0.00455104	GOLGA4;FGD6;MKI67;SPTBN1
nasopharynx carcinoma DOID-9261 human GSE13597 sample 613	4/297	0.989768	1	0	0	0.406275	0.00417839	P4HB;EEF2;MGLL;ACTG1
amyotrophic lateral sclerosis type 10 DOID-0060201 human GSE18632 sample 629	5/344	0.989931	1	0	0	0.438458	0.00443714	TANGO6;STAG1;NCEH1;H2AFV;BICC1
Hypercholesteremia C0020443 mouse GSE3889 sample 221	4/298	0.990021	1	0	0	0.404912	0.00406096	ERRFI1;PIGR;LIPC;CBS
pancreatic cancer DOID-1793 human GSE18670 sample 483	3/253	0.990982	1	0	0	0.357699	0.00324031	MPP7;MEGF9;CREB5
lung squamous cell carcinoma DOID-3907 human GSE51852 sample 734	3/253	0.990982	1	0	0	0.357699	0.00324031	BTD;WSCD1;LIMCH1
Wolfram syndrome UMLS CUI-C0043207 mouse GSE15293 sample 695	5/350	0.991263	1	0	0	0.430942	0.0037816	ZFHX2;GNG7;MALAT1;SHB;MLLT3
schizophrenia DOID-5419 human GSE12679 sample 542	4/304	0.991417	1	0	0	0.39692	0.00342158	ZMAT2;CRIM1;UBXN7;RBCK1
colitis DOID-0060180 mouse GSE34874 sample 800	3/255	0.991457	1	0	0	0.354893	0.00304492	ARL3;MGLL;MEGF9
psoriasis DOID-8893 human GSE61281 sample 697	3/255	0.991457	1	0	0	0.354893	0.00304492	TIAM2;WSCD1;PPP1R9A
methylmalonic acidemia DOID-14749 mouse GSE41044 sample 476	3/256	0.991685	1	0	0	0.353507	0.00295166	VCAN;NCEH1;TNC
autism spectrum disorder DOID-0060041 human GSE29691 sample 1038	4/307	0.992043	1	0	0	0.393041	0.0031401	CANX;RARA;RPL35;MAD1L1
autistic disorder DOID-12849 human GSE6575 sample 1042	1/143	0.992077	1	0	0	0.21095	0.001678	C2ORF88
asthma DOID-2841 human GSE27011 sample 565	2/208	0.992871	1	0	0	0.290057	0.00207508	NEBL;PCDHA11
Dengue Fever DOID-12206 human GSE51808 sample 447	3/266	0.993666	1	0	0	0.340217	0.00216171	MAP2K3;MICAL2;CREB5
Type 2 diabetes mellitus C0011860 rat GSE2470 sample 238	3/268	0.994004	1	0	0	0.337678	0.00203098	FUT8;ALCAM;ELAVL1
cardiomyopathy DOID-0050700 human GSE9128 sample 780	2/215	0.994216	1	0	0	0.280613	0.0016278	CD9;DCP1A
fetal alcohol spectrum disorder DOID-0050696 mouse GSE34305 sample 526	4/320	0.994284	1	0	0	0.377074	0.00216158	LGALS3BP;BCAR3;NXN;CHAC1
Neurological pain disorder C0423704 rat GSE15041 sample 356	5/370	0.994594	1	0	0	0.407647	0.00220968	TOP2A;ABLIM2;ASPH;ALDH1A2;DCDC2
Turner syndrome DOID-3491 human GSE58435 sample 1059	3/272	0.994627	1	0	0	0.332712	0.00179261	LOC101929705;NOL8;PCDH1
Depression DOID-1595 mouse GSE26025 sample 463	3/273	0.994772	1	0	0	0.331494	0.00173749	LTBP2;DEK;ARHGAP6
asthma DOID-2841 human GSE43696 sample 829	4/324	0.994842	1	0	0	0.372419	0.00192608	SPON1;KCNJ16;THSD7A;SNTB1
Ankylosing Spondylitides C0038013 human GSE11886 sample 202	4/326	0.9951	1	0	0	0.370134	0.00181799	LGALS3BP;CRIM1;SLC39A10;SLC7A11
asthma DOID-2841 human GSE43696 sample 830	4/333	0.995911	1	0	0	0.362353	0.00148464	SLC39A10;KCNJ16;THSD7A;KALRN
colon cancer DOID-219 mouse GSE63032 sample 661	2/228	0.996086	1	0	0	0.264613	0.00103784	SH2D4A;RPS6KA2
sickle cell anemia DOID-10923 human GSE11524 sample 481	2/229	0.996202	1	0	0	0.263458	0.00100256	EEF1A1;RNF111
pancreatic cancer DOID-1793 human GSE49515 sample 555	3/288	0.996548	1	0	0	0.314228	0.00108669	FTO;PRSS23;EREG
Lymphatic edema C0024236 mouse GSE4333 sample 207	3/293	0.996997	1	0	0	0.308866	0.000928991	TNC;MMADHC;MAD1L1
allergic contact dermatitis DOID-3042 human GSE6281 sample 927	4/345	0.997009	1	0	0	0.34975	0.00104759	ANLN;SCEL;SHROOM2;FAT4
Carcinoma, Hepatocellular C0019204 mouse GSE4612 sample 315	2/237	0.997018	1	0	0	0.254565	0.000760368	RPS14;CBS
polycystic ovary syndrome DOID-11612 human GSE10946 sample 826	3/306	0.997914	1	0	0	0.295744	0.000617485	TOP2A;MIR21;PWRN1
Lung transplant rejection C0729958 mouse GSE3418 sample 83	3/307	0.997972	1	0	0	0.294781	0.000598359	PIGR;SCNN1A;PPL
adenosquamous cell lung carcinoma DOID-4829 human GSE51852 sample 731	3/308	0.998029	1	0	0	0.293824	0.000579822	WSCD1;SPOCK2;EMP1
Leber congenital amaurosis C0339527 mouse GSE3249 sample 213	3/309	0.998083	1	0	0	0.292873	0.000561855	HMGB2;CHAC1;PLCXD2
fetal alcohol spectrum disorder DOID-0050696 mouse GSE34305 sample 525	2/255	0.998275	1	0	0	0.236595	0.00040856	TSPAN4;AATF
Asthma DOID-2841 human GSE43696 sample 635	3/314	0.998336	1	0	0	0.288209	0.000479992	KCNJ16;THSD7A;BICC1
Neurological pain disorder C0423704 rat GSE18803 sample 212	1/189	0.998339	1	0	0	0.159608	0.000265269	CHAC1
non-systemic juvenile idiopathic arthritis (sJIA) (subgroup-psoriatic) DOID-848 human GSE21521 sample 580	2/262	0.998607	1	0	0	0.230274	0.000320994	ITGB2-AS1;FTX
lung large cell carcinoma DOID-4556 human GSE51852 sample 732	4/374	0.998613	1	0	0	0.32263	0.000447913	PIGR;SCEL;EMP1;KCNJ16
glaucoma associated with systemic syndromes DOID-1686 mouse GSE26299 sample 488	3/328	0.998882	1	0	0	0.275908	0.000308615	STK32A;LYPD6;TRHDE
Wolfram Syndrome 10632 mouse GSE33372 sample 457	2/273	0.999006	1	0	0	0.220996	0.000219811	THSD7A;SPTBN1
breast adenocarcinoma DOID-3458 human GSE61304 sample 1071	3/334	0.999058	1	0	0	0.270951	0.000255318	PIGR;LIPC;C2ORF88
melanoma DOID-1909 human GSE6887 sample 948	3/337	0.999136	1	0	0	0.268539	0.000232215	SMURF2;ZNF618;UACA
systemic juvenile idiopathic arthritis (sJIA) (enthesitis-related) DOID-848 human GSE21521 sample 575	2/278	0.999148	1	0	0	0.217021	0.000185087	TOP2A;UHRF1
Wilson disease DOID-893 mouse GSE5348 sample 966	2/284	0.999291	1	0	0	0.212436	0.000150605	LONP1;ACTG1
psoriasis DOID-8893 mouse GSE27628 sample 820	2/287	0.999354	1	0	0	0.210215	0.000135864	PODXL2;TRABD2B
asthma DOID-2841 human GSE31773 sample 715	2/292	0.999446	1	0	0	0.206616	0.000114445	VCAN;C2ORF88
asthma DOID-2841 human GSE31773 sample 713	2/294	0.999479	1	0	0	0.20521	0.000106859	C5ORF17;COX3
liver cirrhosis DOID-5082 human GSE50892 sample 1012	2/299	0.999554	1	0	0	0.201779	9.00344e-05	ERRFI1;ADIRF
psoriasis DOID-8893 mouse GSE27628 sample 821	3/373	0.999694	1	0	0	0.242621	7.43028e-05	ALCAM;COBL;CHAC1
sickle-cell anemia DOID-10923 human GSE16728 sample 507	1/268	0.999885	1	0	0	0.112559	1.2967e-05	EVPL
glaucoma associated with systemic syndromes DOID-1686 mouse GSE26299 sample 487	2/345	0.999892	1	0	0	0.174875	1.89007e-05	FAT4;TRHDE
non-systemic juvenile idiopathic arthritis (sJIA) (subgroup-RF-polyarthritis) DOID-848 human GSE21521 sample 578	1/273	0.999902	1	0	0	0.110498	1.07869e-05	ARHGAP24
Cancer of the testis C0153594 human GSE1818 sample 246	3/452	0.999967	1	0	0	0.200216	6.51646e-06	RSPH3;CNOT10;AMOTL1
papillary thyroid carcinoma DOID-3969 human GSE54958 sample 652	1/402	0.999995	1	0	0	0.0750396	3.59775e-07	TOB2
glaucoma associated with systemic syndromes DOID-1686 mouse GSE26299 sample 486	1/415	0.999996	1	0	0	0.0726889	3.2179e-07	STIL

## Sheet: Disease Perturbations from GEO up
Term	Overlap	P-value	Adjusted P-value	Old P-value	Old Adjusted P-value	Odds Ratio	Combined Score	Genes
Osteoarthritis C0029408 human GSE16464 sample 199	29/317	8.75939e-07	0.000734913	0	0	2.75966	38.4916	TOP2A;ERRFI1;RABGAP1;UHRF1;TNC;HMGB2;NUCKS1;ACTG1;GOLGA4;DHX15;RPL35;PLS3;COX1;AP3S1;NDEL1;CBX1;CRIM1;DEK;C12ORF75;NEAT1;KTN1;ANLN;MORF4L1;VCAN;ANP32E;KIF20A;ANP32B;SNRPF;ND4
GERD - Gastro-esophageal reflux disease C0017168 human GSE2144 sample 27	30/346	1.7413e-06	0.000730475	0	0	2.61554	34.6844	MTCL1;NUCKS1;PRSS23;ACTB;ACTG1;AKAP12;RPL35;SPTBN1;NDEL1;SUPT16H;ANXA1;MYOF;PLAUR;EMP1;MIR21;EREG;EXT1;MORF4L1;NCL;CANX;CD9;SNRPF;EZR;CALM2;GAPDH;VCL;EPHA2;LIMS1;NFE2L2;PLEC
endometrial cancer DOID-1380 human GSE17025 sample 849	24/278	2.00213e-05	0.00559929	0	0	2.60425	28.1747	TOP2A;ATP6V1A;SLC38A1;ANXA1;HMGB2;SLC39A10;NUCKS1;ASAP2;DEK;C12ORF75;EGFR;CCAR1;SKA2;ACTG1;SUMO1;ANP32E;COX2;COX1;UBA52;CALM2;GAPDH;MMADHC;VCL;ND4
Breast Cancer C0006142 mouse GSE2528 sample 28	25/299	2.32647e-05	0.00487976	0	0	2.52223	26.9086	ATP6V1A;ITGB1;APP;ERRFI1;PIGR;LTBP2;LITAF;ACTB;PTPRF;ACTG1;FAM3C;SPTAN1;SHROOM3;ACTN4;EEF2;MORF4L1;AIM1;CDCP1;NFIB;NCL;CD9;P4HB;EZR;CALM2;EPHA2
Malignant mesothelioma of pleura C0812413 human GSE2549 sample 118	30/397	2.60974e-05	0.00437915	0	0	2.27954	24.0575	LGALS3BP;APP;HMGB2;PRSS23;ACTB;ACTG1;RPS14;SPOCK2;PDGFC;DHX15;RPL35;PLS3;AP3S1;TNS3;SKP1;CRIM1;EMP1;MICAL2;ADAM10;MIR21;EEF2;VCAN;ALDH1A2;CANX;CD9;P4HB;EZR;GAPDH;CALM2;NFE2L2
Hypoxia C0242184 human GSE4483 sample 440	26/325	3.4336e-05	0.00480132	0	0	2.41327	24.8068	APP;RNF11;SLC2A1;IRS2;VLDLR;PLOD1;PRSS23;PTPRF;AKAP12;LONP1;ABL1;COX1;AP3S1;CA12;MYOF;HUWE1;SLC39A10;NEAT1;EEF2;KTN1;MORF4L1;CANX;SMS;CD9;MALAT1;GAPDH
Breast Cancer C0006142 human GSE2155 sample 39	27/350	4.59324e-05	0.00550532	0	0	2.32708	23.2437	ITGB1;TRABD;B4GALT1;SLC2A1;ITPR3;SLC7A11;EGFR;OSBPL10;SLK;HAS3;FLNA;SIRPA;FLNB;HIVEP2;MAP4;ITGA3;RHBDF2;HMGA2;ACTN4;EEF2;DCBLD2;HADHA;CDCP1;TRIB3;OGT;THOP1;EPHA2
Acute pancreatitis C0001339 mouse GSE3644 sample 376	30/412	5.19173e-05	0.00544483	0	0	2.19655	21.6708	OSER1;TRABD;ERRFI1;RNF11;RRBP1;SLC7A11;ACTB;ACTG1;RPS6KA2;NRIP1;DHX15;FLNB;CHAC1;MAP3K5;MAP2K3;HSPA9;MGEA5;SLC38A1;MORC4;SARS;ACTN4;NEAT1;EEF2;EEF1A1;CDCP1;CD9;TRIB3;ANP32B;CALM2;NFE2L2
osteoarthritis DOID-8398 human GSE16464 sample 751	20/229	8.21288e-05	0.00765623	0	0	2.63458	24.7841	CA12;APP;ERRFI1;HUWE1;TNC;NEAT1;ACTB;KTN1;ACTG1;EEF1A1;GOLGA4;VCAN;ALCAM;RPL35;PLS3;COX1;MALAT1;GAPDH;VGLL4;ND4
Asthma, allergic C0155877 human GSE3004 sample 360	28/383	8.54373e-05	0.00716819	0	0	2.20534	20.659	B4GALT1;MVP;TNFAIP2;PPL;LITAF;ACTB;ACTG1;KIAA0513;LASP1;NDUFV2;TGM2;MAP2K3;ANXA1;CRIM1;COBL;ACTN4;TNIP1;NCL;CANX;CD9;PKP3;TOP1;P4HB;EZR;CALM2;GAPDH;VCL;NFE2L2
low-grade serous ovarian carcinomas DOID-0050933 human GSE56443 sample 755	25/341	0.000192836	0.0147082	0	0	2.21158	18.9171	TOP2A;PIGR;NRP2;TNC;TNFAIP2;LTBP2;BRCA2;KLC1;THSD4;SCEL;DUSP10;SPOCK2;DLEU1;TNS4;SRGAP1;PCDHA6;ABCC3;ITGA3;MACC1;LMO7;ANLN;CENPF;VCAN;TBC1D2;MET
pancreatitis DOID-4989 mouse GSE3644 sample 513	26/362	0.000200303	0.0140045	0	0	2.16661	18.4502	OSER1;TRABD;ERRFI1;RNF11;LITAF;ACTB;ACTG1;RPS6KA2;MYO18A;FLNB;CHAC1;MAP3K5;MAP2K3;MGEA5;MORC4;ACTN4;NEAT1;EEF2;TRIB3;ANP32B;TOP1;EZR;CALM2;GAPDH;VCL;NFE2L2
colon cancer DOID-219 human GSE34299 sample 502	23/304	0.000218463	0.0140992	0	0	2.28229	19.2372	ANXA1;C5ORF17;MYOF;TNC;SLC2A1;PLAUR;EMP1;COBL;PPP2R3A;PRSS23;EGFR;DCBLD2;AKAP12;SCEL;NCEH1;ABLIM3;HAS3;COX1;EPHB2;EZR;EPHA2;ND4;CREB5
Papillary Carcinoma of the Thyroid C0238463 human GSE3678 sample 306	23/308	0.000263796	0.0158089	0	0	2.25265	18.5626	ANXA1;SH2D4A;NXN;SLC39A10;IRS2;ASAP2;NEAT1;EEF2;PPL;PRSS23;EEF1A1;FAM111A;TBC1D2;MED13;LURAP1L;PDGFC;COX2;PLS3;COX1;AP3S1;MYH10;MET;ND4
Erectile dysfunction associated with type 2 diabetes mellitus C1997651 rat GSE2457 sample 186	25/351	0.000299281	0.0167398	0	0	2.14857	17.4338	APP;ERRFI1;PIGR;IRS2;TOB2;PRSS23;ACTB;ACTG1;ALCAM;ZMIZ1;RPL35;COX2;FLNA;COX1;ANXA1;LMO7;SDHA;EEF2;EEF1A1;HADHA;PLXNB2;CD9;CYTB;EZR;UBA52
colorectal cancer DOID-9256 human GSE1323 sample 763	25/351	0.000299281	0.0156935	0	0	2.14857	17.4338	TOP2A;LGALS3BP;NXN;TNC;HMGB2;UQCR11;ACTB;ACTG1;LASP1;FLNA;PLS3;SH3BP4;TNS3;MYH10;MBD3;SUPT16H;SLC38A1;SGTA;DEK;EEF2;NCL;SMS;ANP32B;CALM2;VGLL4
cervical cancer DOID-4362 human GSE9750 sample 619	24/335	0.0003605	0.0177918	0	0	2.16114	17.1336	TOP2A;LGALS3BP;SLC38A1;HMGB2;ACTN4;DEK;TUBG1;SDHA;EEF2;ACTB;ACTG1;ALCAM;NCL;CANX;PLS3;TRIB3;KIF20A;ANP32B;SNRPF;P4HB;SLIRP;NDUFV2;SAE1;GAPDH
myotonic dystrophy type 1 DOID-11722 human GSE7177 sample 1053	23/316	0.000379932	0.0177091	0	0	2.19562	17.2916	ERRFI1;RNF11;ANXA1;MORC4;TNC;HMGB2;SLC39A10;NUCKS1;SLC7A11;DEK;PRSS23;KTN1;EEF1A1;ANLN;ALCAM;NCL;DHX15;SMS;FLNA;PLS3;MALAT1;CALM2;MMADHC
Nemaline Myopathy C0206157 mouse GSE3384 sample 317	30/466	0.00044342	0.0195805	0	0	1.94201	14.9943	ITGB1;APP;MACF1;RNF11;PLEKHB2;MGST3;HDLBP;MLLT3;GOLGA4;SUMO1;U2AF2;NRIP1;KPNA1;MAP2K3;HSPA9;SVIL;PPTC7;UBE2B;RDX;SGTA;DYRK1A;EMP1;LMO7;NCOR2;EEF1A1;MORF4L1;NFIB;NCL;LIMS1;PLEC
Senescence C0001792 rat GSE854 sample 161	21/286	0.000598665	0.025114	0	0	2.21498	16.4369	APP;NRP1;B4GALT1;PLLP;SLC2A1;PTPRJ;EEF2;TRIOBP;EGFR;RPS14;RXRA;NCL;SPOCK2;COX3;RPL35;COX2;CD9;UBA52;SPTAN1;ND4;PLEC
Acne C0702166 human GSE10432 sample 297	22/308	0.000649443	0.0259468	0	0	2.15471	15.8143	SVIL;SMAD3;LIMCH1;BDNF;PCDH7;CTR9;TNFAIP2;ACTN4;TFPI;LITAF;FUT8;MED13;CAPZB;RPS6KA2;SPOCK2;NRIP1;FAM63B;PLXNB2;EPHB2;AGRN;RALGPS1;NFE2L2
papillary thyroid carcinoma DOID-3969 human GSE54958 sample 653	16/194	0.000769016	0.0293275	0	0	2.48791	17.8393	NRP2;SH2D4A;ITGA3;HMGA2;PPL;PRSS23;SCEL;TBC1D2;GALE;SCNN1A;LONP1;CLDN16;STK32A;MAMLD1;MYH10;MET
Breast Cancer C0006142 rat GSE1872 sample 63	18/233	0.000802862	0.029287	0	0	2.33041	16.6096	LGALS3BP;ERRFI1;ANXA1;ITGA3;TNC;EMP1;PLOD1;LITAF;ACTB;ACTG1;NCOR2;EEF1A1;ALCAM;CD9;COX1;CALM2;GAPDH;RAI14
chronic lymphocytic leukemia DOID-1040 human GSE6691 sample 786	22/315	0.000873673	0.0305422	0	0	2.10683	14.838	SLC38A1;MVP;NT5C2;LITAF;ARHGAP24;AKAP12;MORF4L1;SEC14L1;RXRA;ATXN1;TNIP1;SPOCK2;EP400;ROR1;HIVEP2;FAM3C;TOP1;OGT;RALGPS1;LIMS1;MAP3K5;SLC16A5
endometrial cancer DOID-1380 human GSE17025 sample 847	17/220	0.00110591	0.0371144	0	0	2.331	15.8673	EIF5B;GLIS3;TNFAIP2;NUCKS1;IRS2;NUP153;DEK;C12ORF75;CCAR1;ZMIZ1;COX3;COX2;COX1;THSD7A;VCL;MAP3K5;ND4
Hypertension C0020538 rat GSE2739 sample 209	15/182	0.00111731	0.0360547	0	0	2.4862	16.8983	RBM25;SLC2A1;TFPI;EEF1A1;SPOCK2;CANX;COX3;PLS3;COX2;CD9;COX1;CYTB;OGT;ND5;NKTR
Cardiomyopathy, Dilated C0007193 human GSE3585 sample 198	22/326	0.0013607	0.0422825	0	0	2.03574	13.4354	MGEA5;SPON1;FNBP1;MTCL1;HMGB2;MICAL2;LTBP2;ASAP2;FNBP1L;PRSS23;EXT1;ABTB2;AKAP12;VCAN;SLK;TRPS1;MTHFD2L;SMS;FLNA;ROR1;MYH10;VCL
Dehydration C0011175 rat GSE3131 sample 60	17/225	0.00141219	0.0423153	0	0	2.2792	14.9575	LGALS3BP;ARRDC1;EEF2;ACTB;ACTG1;INPP4A;EEF1A1;GNG7;COX3;RPL35;COX2;COX1;RAB11FIP3;CALM2;GAPDH;ND5;PLEC
salivary gland adenoid cystic carcinoma DOID-4866 human GSE36820 sample 511	23/351	0.0015747	0.0455576	0	0	1.97668	12.7569	APP;NXN;CBX1;HMGB2;IRS2;ACTN4;PLOD1;DEK;EEF2;ACTB;ACTG1;EEF1A1;VCAN;RPL35;COX2;FLNA;PLS3;COX1;ANP32B;UBA52;GAPDH;VGLL4;ND4
colon carcinoma DOID-1520 mouse GSE422 sample 651	26/421	0.00186893	0.0522677	0	0	1.86298	11.704	ITGB1;APP;ERRFI1;MACF1;RNF11;HDLBP;MLLT3;LITAF;ACTG1;SUMO1;U2AF2;FAM120A;HSPA9;SMARCC1;ANXA1;HSPA4;EMP1;LMO7;EEF1A1;THRAP3;CD9;TOP1;ANP32B;EZR;GAPDH;CALM2
Lung Injury C0273115 human GSE1541 sample 67	18/254	0.00211873	0.0573425	0	0	2.13774	13.1619	LGALS3BP;MGST3;TNFAIP2;PLAUR;ACTN4;ACTB;EEF1A1;RPS14;LASP1;TSPAN4;OGDH;FLNA;TRIB3;SNRPF;P4HB;CALM2;GAPDH;TGM2
Nicotine addiction C0028043 human GSE11208 sample 325	10/103	0.0022154	0.0580849	0	0	2.92873	17.9013	EEF1A1;RPL35;COX2;COX1;UBA52;CALM2;GAPDH;ACTB;ACTG1;ND4
nemaline myopathy DOID-3191 mouse GSE3384 sample 975	23/361	0.0022563	0.0573646	0	0	1.92193	11.7123	MAP2K3;HSPA9;ITGB1;APP;SVIL;RNF11;PLEKHB2;PPTC7;UBE2B;ITSN1;HDLBP;LMO7;MLLT3;ACTB;ACTG1;NCOR2;GOLGA4;RPS6KA2;NCL;OGDH;NDUFV2;SPTBN1;PLEC
Bacterial Infection C0004623 human GSE3026 sample 322	24/385	0.00243361	0.060053	0	0	1.88047	11.3174	ITGB1;MACF1;FNBP1;ITGB2;TNFAIP2;JADE2;EEF2;GIGYF2;ACTB;ACTG1;ARVCF;LASP1;VCAN;FAM102A;RXRA;CANX;FLNA;PLXNB2;ANP32B;EZR;OGT;GAPDH;VCL;PLEC
Carcinoma in situ of small intestine C0686083 mouse GSE422 sample 119	25/408	0.00251284	0.0602364	0	0	1.8484	11.0652	ITGB1;APP;ERRFI1;MACF1;RNF11;HDLBP;MLLT3;LITAF;ACTG1;SUMO1;U2AF2;FAM120A;HSPA9;SMARCC1;ANXA1;HSPA4;EMP1;LMO7;EEF1A1;THRAP3;CD9;TOP1;ANP32B;EZR;GAPDH
familial combined hyperlipidemia DOID-13809 human GSE11393 sample 773	19/279	0.00253674	0.0591201	0	0	2.05431	12.2784	DOCK4;CRIM1;NOL8;TFPI;MLLT3;CAPN15;AKAP12;GOLGA3;CLIP2;MYO1E;ALCAM;ATXN1;DMXL1;PDGFC;FAM3C;TNIK;TNS3;RAI14;PHACTR4
Tendonopathy 971 human GSE26051 sample 470	21/322	0.00260863	0.0591525	0	0	1.96734	11.7036	ITGB1;ANXA1;CBX1;HUWE1;TNC;CRIM1;ADIRF;EMP1;MIR21;ASAP2;ACTB;ACTG1;EEF1A1;ZC3H11A;CANX;CD9;MALAT1;CALM2;GAPDH;SPTBN1;VCL
breast cancer DOID-1612 human GSE9574 sample 448	22/344	0.0026561	0.0586438	0	0	1.92922	11.442	PANK2;SLC38A1;RABGAP1;IRS1;ZBTB20;NUCKS1;FNBP1L;ACTB;ACTG1;RPS14;FAM111A;ALCAM;SLK;SLTM;NCL;RPL35;SH3BP4;ANP32B;AP3S1;P4HB;UBA52;LUC7L2
Nemaline Myopathy C0206157 mouse GSE3384 sample 78	23/366	0.00268198	0.057697	0	0	1.89567	11.2247	MAP2K3;HSPA9;ITGB1;APP;MGEA5;RNF11;LIMCH1;MGST3;ZBTB20;UQCR11;IRS2;LMO7;MLLT3;NCOR2;EEF1A1;GOLGA4;SUMO1;NFIB;U2AF2;NCL;OGDH;LIMS1;KPNA1
Arthropathy C0022408 human GSE10575 sample 271	15/199	0.00268916	0.0564051	0	0	2.27381	13.4576	ERRFI1;LTBP2;EEF2;ACTB;ACTG1;EEF1A1;ALCAM;RPL35;COX2;COX1;UBA52;CALM2;GAPDH;RAI14;ND4
endometrial cancer DOID-1380 human GSE17025 sample 839	19/289	0.0037343	0.0764166	0	0	1.98323	11.0866	TOP2A;ATP6V1A;LGALS3BP;PIGR;SLC38A1;ANXA1;DEK;ACTB;LASP1;NCL;ANP32E;SMS;COX2;COX1;TOP1;P4HB;GAPDH;MMADHC;ND4
Myocardial Infarction C0027051 rat GSE4105 sample 437	21/336	0.00427557	0.0854096	0	0	1.88537	10.2844	ITGB1;APP;ANXA1;TNC;EEF2;LITAF;ACTB;ACTG1;EEF1A1;RPS14;CAPZB;FAM120A;RPL35;FLNA;PLXNB2;ANP32B;P4HB;CALM2;SPTAN1;SKP1;TGM2
ulcerative colitis DOID-8577 human GSE1710 sample 993	16/230	0.0043625	0.0851195	0	0	2.0985	11.4047	PANK2;KIRREL;ARRDC1;ITGB2-AS1;MYO9B;C12ORF75;RANGAP1;ACTB;THSD4;NR2F6;ACTG1;EEF1A1;FAM63B;SLIRP;BAHCC1;DBN1
Bone fracture C0016658 rat GSE594 sample 275	22/359	0.00441819	0.0842469	0	0	1.84861	10.0232	ITGB1;APP;ERRFI1;TNC;HDLBP;EMP1;RRBP1;EEF2;LITAF;ACTB;ACTG1;EEF1A1;RPS14;VCAN;CANX;RPL35;PLS3;CD9;P4HB;UBA52;RAB11FIP3;CALM2
Pseudomonas Infection C0033817 human GSE923 sample 170	22/361	0.00471373	0.087885	0	0	1.83837	9.84863	SLC38A1;ANXA1;ACTN4;ASAP2;ACTB;EREG;ACTG1;AKAP12;EEF1A1;MORF4L1;TNIP1;NCL;CANX;SMS;CD9;AP3S1;FAM3C;NDUFV2;CALM2;GAPDH;SPTBN1;SKP1
diabetes mellitus type 2 DOID-9352 human GSE12643 sample 766	17/254	0.00494921	0.0902693	0	0	2.01898	10.7178	B4GALT1;PPP1R12A;SMURF2;CHD9;NCBP2;MICAL2;ZBTB20;RRBP1;THOC2;BICD1;DCBLD2;CAPZB;DLC1;ERF;VCL;LIMS1;TGM2
hepatitis C DOID-1883 human GSE20948 sample 598	19/298	0.00518183	0.0925012	0	0	1.92333	10.1217	HSPA9;ERRFI1;SLC38A1;UHRF1;HMGB2;SLC7A11;EEF2;EEF1A1;NCL;DHX15;COX2;TRIB3;COX1;CHAC1;ANP32B;GAPDH;MMADHC;EPHA2;ND4
Meningococcal infection C0025303 human GSE4646 sample 347	23/387	0.0052852	0.0923808	0	0	1.79281	9.39941	MAP2K3;APP;RNF11;SMURF2;MTCL1;TNFAIP2;EMP1;MIR21;SLC7A11;EEF2;HSPG2;PRSS23;EXT1;AKAP12;MORF4L1;RPS14;TNIP1;ZMIZ1;NCL;RPS6KA2;ABL1;RPL35;NFE2L2
ovarian cancer DOID-2394 human GSE14407 sample 611	16/236	0.00557375	0.0954362	0	0	2.04515	10.6137	APP;SPON1;SLC2A1;HMGB2;MIR21;DEK;PPL;ACTB;THSD4;SCNN1A;RPL35;RBCK1;ANP32B;SLIRP;MYH10;GAPDH
progressive myoclonus epilepsy DOID-891 mouse GSE47516 sample 516	26/459	0.00586121	0.0983511	0	0	1.70874	8.78192	TOP2A;ERRFI1;CDCA2;UHRF1;TNC;HMGB2;MKI67;TFPI;PRSS23;UACA;MBD3;ABCC4;STIL;ANXA1;EMP1;HMGA2;H2AFV;BICC1;SUMF1;FAM111A;ANLN;CENPF;ALDH1A2;KIF20A;ANP32B;VCL
Type 2 diabetes mellitus C0011860 human GSE12643 sample 274	21/346	0.00594392	0.0977833	0	0	1.83088	9.38396	TOP2A;CA12;SVIL;MBNL2;RABGAP1;TNC;TNFAIP2;ADIRF;SARS;NMNAT2;SDHA;PPL;LITAF;CENPF;AIM1;ALCAM;NFIB;RPS6KA2;CD9;ROR1;NFE2L2
Tachycardia C0039231 rat GSE7999 sample 244	23/392	0.00614569	0.0991583	0	0	1.76994	9.01254	MAP2K3;ITGB1;MACF1;GDA;GRAMD3;EEF2;PRSS23;ACTB;KTN1;ACTG1;EEF1A1;MORF4L1;RPS14;NCL;FAM120A;ANP32E;RPL35;PLXNB2;P4HB;SAE1;SPTAN1;TGM2;PLEC
osteoarthritis DOID-8398 human GSE16464 sample 752	23/394	0.0065208	0.103225	0	0	1.76095	8.86246	TOP2A;RABGAP1;UHRF1;CBX1;HMGB2;NUCKS1;DEK;C12ORF75;TUBG1;ACTB;MORF4L1;ANLN;VCAN;NCL;POLE3;ANP32E;DHX15;PLS3;AP3S1;SNRPF;KIF20A;CALM2;ND4
Epilepsy C0014544 human GSE7486 sample 417	14/199	0.00670904	0.104239	0	0	2.12223	10.6202	PIGR;NEAT1;EEF2;ACTB;EEF1A1;NCL;CANX;RPL35;COX2;COX1;MALAT1;P4HB;GAPDH;ND4
prostate cancer DOID-10283 human GSE3325 sample 991	18/285	0.00703696	0.107346	0	0	1.90522	9.44335	TOP2A;ERRFI1;PIGR;UHRF1;CBX1;HMGB2;NUCKS1;DEK;NEAT1;ACTG1;ALCAM;RPL35;COX2;MALAT1;P4HB;UBA52;MAP3K5;ND4
Serous carcinoma C0206701 human GSE10971 sample 58	18/287	0.00754146	0.112987	0	0	1.89194	9.24655	SPON1;SLC38A1;STIL;NCBP2;HMGB2;ASAP2;DEK;SKA2;SUMF1;SUMO1;COX3;SMS;COX2;COX1;ANP32B;CDR2L;UBA52;ND4
Alpha-1 anti-trypsin deficiency C0221757 human GSE1122 sample 281	16/244	0.00759901	0.111852	0	0	1.97809	9.65257	MAP2K3;FTO;ANXA1;ITGA3;TNFAIP2;PLAUR;EMP1;ITPR3;NEAT1;ACTB;EEF1A1;CALM2;SPTBN1;VGLL4;EPHA2;TGM2
Colitis C0009319 mouse GSE2172 sample 401	17/266	0.0077424	0.111998	0	0	1.9279	9.37159	HSPA9;ABCC3;MACF1;PIGR;PLEKHB2;LMO7;RRBP1;ACTB;ACTG1;EEF1A1;MORF4L1;GOLGA4;CDCP1;SUMO1;NCL;CALM2;GAPDH
nemaline myopathy DOID-3191 mouse GSE3384 sample 971	27/493	0.00777921	0.110623	0	0	1.65209	8.02304	ITGB1;APP;MACF1;RNF11;MGST3;HDLBP;ZBTB20;MLLT3;U2AF2;MAP2K3;HSPA9;SVIL;PPTC7;UBE2B;RDX;SGTA;DYRK1A;EMP1;LMO7;NCOR2;EEF1A1;MORF4L1;NFIB;NCL;LIMS1;NFE2L2;PLEC
Ulcerative Colitis C0009324 human GSE1710 sample 264	14/203	0.00794113	0.111044	0	0	2.08041	10.0602	PANK2;KIRREL;ARRDC1;ITGB2-AS1;MYO9B;RANGAP1;ACTB;THSD4;ACTG1;EEF1A1;FAM63B;SLIRP;BAHCC1;DBN1
Hypoxia C0242184 mouse GSE2271 sample 446	18/290	0.00835263	0.114883	0	0	1.87237	8.95961	MAP2K3;SVIL;RBM25;NEK6;CBX1;DEK;GRAMD3;KLC1;TFPI;TOB2;NCOR2;NCL;MALAT1;RBCK1;TOP1;P4HB;OBSL1;SLC16A5
Idiopathic fibrosing alveolitis C0085786 human GSE10921 sample 272	15/226	0.00860675	0.116469	0	0	2.00216	9.5207	LGALS3BP;ITGB1;APP;SLC38A1;SMAD3;MYOF;HDLBP;SARS;LTBP2;EEF2;AKAP12;VCAN;FLNA;SH3BP4;VCL
Status Epilepticus C0038220 rat GSE4236 sample 391	20/336	0.00877024	0.116797	0	0	1.79559	8.50462	ATP6V1A;ITGB1;ERRFI1;EIF5B;BDNF;SLC2A1;EEF2;OXR1;ACTB;EEF1A1;SPOCK2;CANX;RPL35;COX2;CD9;CYTB;P4HB;EZR;RAB11FIP3;PLEC
Fracture of femur C0015802 rat GSE1685 sample 240	24/432	0.00990587	0.12986	0	0	1.67588	7.73358	ITGB1;TOP2A;ATP6V1A;HUWE1;HDLBP;HMGB2;EMP1;EEF2;SDHA;LITAF;ACTB;ACTG1;EEF1A1;RPS14;RPL35;PLS3;CD9;P4HB;UBA52;GAPDH;TNS3;RAB11FIP3;CALM2;METAP2
Alzheimer's disease DOID-10652 human GSE4757 sample 592	15/231	0.010398	0.134214	0	0	1.95883	8.94428	ATP6V1A;PLLP;ADIRF;UQCR11;NUCKS1;EEF2;RPS14;COX3;RPL35;ANP32B;SEC62;TNS3;UBA52;GAPDH;MGLL
endometrial cancer DOID-1380 human GSE17025 sample 840	18/298	0.010863	0.138091	0	0	1.8221	8.24027	TOP2A;SLC38A1;ANXA1;HMGB2;SLC39A10;DEK;C12ORF75;ACTB;ACTG1;LASP1;NCL;SMS;COX2;CD9;COX1;P4HB;GAPDH;ND4
Nemaline Myopathy C0206157 mouse GSE3384 sample 160	17/276	0.0109349	0.136932	0	0	1.85805	8.39055	MAP2K3;APP;SVIL;PLEKHB2;PPTC7;UBE2B;HDLBP;IRS2;LMO7;MLLT3;HSPG2;ACTB;EPN1;NCOR2;NCL;GAPDH;PLEC
Diabetic Retinopathy C0011884 rat GSE1979 sample 189	20/346	0.0118377	0.146057	0	0	1.74369	7.73583	LGALS3BP;ITGB1;IQSEC1;MGST3;MVP;UQCR11;LITAF;ACTB;ACTG1;AKAP12;SPOCK2;CANX;RARA;COX2;SIRPA;RBCK1;P4HB;RAB11FIP3;NKTR;NFE2L2
Teratospermia UMLS CUI-C0919628 human GSE6968 sample 954	19/324	0.0121087	0.147235	0	0	1.76899	7.80801	RABGAP1;SGTA;TNFAIP2;ADIRF;MLLT1;SLC7A11;METTL21A;NT5C2;SIPA1L3;INIP;RAD51B;RPS14;IRGQ;MYO1E;ITCH;LASP1;NASP;PKP3;EXOSC2
Setleis syndrome C1744559 human GSE16524 sample 285	22/393	0.012138	0.145482	0	0	1.68868	7.44946	RNF11;SH2D4A;MVP;HMGB2;ADIRF;ADAM10;H2AFV;DEK;NEAT1;EEF2;PPL;SUMF1;AKAP12;MORF4L1;VCAN;ALCAM;CANX;TSPAN4;PLS3;COX1;ANP32B;VCL
bronchopulmonary dysplasia UMLS CUI-C0006287 human GSE8586 sample 918	15/236	0.0124706	0.147364	0	0	1.91732	8.40628	ITGB1;ANXA1;HUWE1;LITAF;RPS14;LASP1;CANX;COX2;PLS3;COX1;CALM2;GAPDH;VCL;TGM2;ND4
Dry eye syndrome C0013238 rat GSE844 sample 228	17/280	0.0124721	0.145335	0	0	1.8315	8.02978	APP;ERRFI1;PIGR;ANXA1;GDA;SDHA;ACTB;ACTG1;EEF1A1;RPL35;CD9;SEC62;EZR;NDUFV2;TNS3;RAB11FIP3;GAPDH
Uterine leiomyoma C0042133 human GSE2725 sample 399	16/258	0.0125285	0.143992	0	0	1.87075	8.19343	CA12;SVIL;SCARA3;MAST4;IRS1;ACTB;ACTG1;MORF4L1;PDGFC;ABL1;FLNA;PLS3;GAPDH;VGLL4;VCL;RAI14
endometriosis DOID-289 human GSE6364 sample 946	14/216	0.0132223	0.149913	0	0	1.9552	8.45789	TOP2A;HUWE1;HMGB2;DEK;ACTB;EEF1A1;NCL;COX3;COX2;COX1;KIF20A;ANP32B;SLIRP;ND4
endometrial cancer DOID-1380 human GSE17025 sample 845	19/327	0.013241	0.148123	0	0	1.75276	7.5797	ATP6V1A;LGALS3BP;APP;PIGR;ANXA1;C12ORF75;NEAT1;ACTB;LASP1;NCL;SMS;COX2;PLS3;COX1;TOP1;P4HB;GAPDH;MMADHC;ND4
prostate cancer DOID-10283 human GSE3868 sample 639	15/238	0.0133846	0.147759	0	0	1.90121	8.20116	LIMCH1;TNC;PLOD1;PRSS23;ACTB;TRIOBP;TGFBR2;EXT1;VCAN;NCL;SLIRP;NDUFV2;UBA52;GAPDH;MMADHC
endometrial cancer DOID-1380 human GSE17025 sample 843	18/305	0.0135215	0.147331	0	0	1.78028	7.66141	ATP6V1A;LGALS3BP;APP;PIGR;SLC38A1;ANXA1;HMGB2;ACTB;NCL;SMS;COX2;CD9;COX1;TOP1;P4HB;GAPDH;MMADHC;ND4
Neurofibromatosis DOID-8712 mouse GSE1482 sample 668	15/240	0.0143499	0.154354	0	0	1.88537	8.00153	ATP6V1A;MACF1;BDNF;DYRK1A;ZBTB20;KALRN;MORF4L1;SNRK;FAM102A;NCL;NRIP1;CALM2;GAPDH;SPTBN1;SPTBN2
COPD - Chronic obstructive pulmonary disease C0024117 human GSE3212 sample 196	22/400	0.014619	0.155257	0	0	1.65913	7.01053	ITGB1;HSPA9;ITGB2;HDLBP;TNFAIP2;SARS;PLOD1;EEF2;LITAF;ACTG1;LASP1;ALCAM;TNIP1;NCL;CANX;SMS;CD9;AP3S1;P4HB;ANP32B;GAPDH;TGM2
nemaline myopathy DOID-3191 mouse GSE3384 sample 974	25/472	0.0149344	0.156625	0	0	1.59777	6.71717	APP;MACF1;RNF11;MGST3;IRS2;MLLT3;ACTG1;GOLGA4;SUMO1;U2AF2;MAP2K3;HSPA9;SGTA;EMP1;LMO7;EEF2;EPN1;NCOR2;EEF1A1;CDC34;NCL;OGDH;CD9;LIMS1;PLEC
nemaline myopathy DOID-3191 mouse GSE3384 sample 977	21/379	0.0155819	0.161398	0	0	1.67146	6.95603	MAP2K3;HSPA9;ITGB1;APP;MACF1;LIMCH1;MGST3;UQCR11;IRS2;LMO7;EPN1;NCOR2;EEF1A1;GOLGA4;SUMO1;U2AF2;OGDH;MAP4;SLIRP;LIMS1;KPNA1
amyotrophic lateral sclerosis DOID-332 mouse GSE3343 sample 685	10/138	0.0167156	0.171029	0	0	2.18594	8.94357	EEF1A1;RPS14;SLC38A1;MALAT1;RASAL2;UBA52;CALM2;GAPDH;ACTB;ACTG1
juvenile dermatomyositis UMLS CUI-C0263666 human GSE11971 sample 772	26/503	0.017513	0.177029	0	0	1.55927	6.30696	LGALS3BP;USP16;ACTB;ACTG1;RPL35;ANKRD10;MAP4;MAP2K3;HSPA9;USP25;SLC38A1;SARS;PPP2R3A;KTN1;EEF1A1;MORF4L1;NCL;CANX;TRIB3;P4HB;SLIRP;CALM2;MGLL;MMADHC;VCL;LIMS1
pancreatic cancer DOID-1793 human GSE23952 sample 798	18/314	0.0176631	0.17642	0	0	1.72926	6.97976	SMURF2;ITGA3;GLIS3;PLAUR;MSANTD3;PRKCA;LTBP2;VLDLR;PLOD1;SPSB1;CDCP1;SMS;FLNA;ABL2;EPHB2;MAMLD1;MGLL;TGM2
diffuse large B-cell lymphoma DOID-0050745 mouse GSE6136 sample 684	11/160	0.0178023	0.175719	0	0	2.07391	8.35458	EEF1A1;RPS14;ANXA1;MALAT1;TMCC2;NEAT1;UBA52;OGT;GAPDH;ACTB;ACTG1
prolactinoma DOID-5394 human GSE36314 sample 636	11/160	0.0178023	0.173676	0	0	2.07391	8.35458	LGALS3BP;GOLGA3;DOCK4;ALCAM;ABLIM3;POLE3;THSD7A;EEF2;HSPG2;MAP3K5;DUXAP10
endometrial cancer DOID-1380 human GSE17025 sample 844	16/269	0.0179281	0.172893	0	0	1.79426	7.21539	PIGR;ANXA1;HMGB2;C12ORF75;NEAT1;ACTB;ACTG1;NCL;ANP32E;SMS;COX2;COX1;TOP1;P4HB;GAPDH;ND4
Down Syndrome C0013080 mouse GSE1611 sample 105	17/294	0.0192282	0.183323	0	0	1.74429	6.89234	ATP6V1A;ITGB1;APP;ITSN1;DYRK1A;H2AFV;NUCKS1;MLLT3;EPN1;NCOR2;U2AF2;SPOCK2;AP3S1;TOP1;CIC;CALM2;SPTAN1
Scleroderma C0011644 human GSE1724 sample 155	22/411	0.0193126	0.182059	0	0	1.61472	6.3733	FTO;ATP6V1A;APP;MYOF;DEK;TFPI;LITAF;TGFBR2;EXT1;LASP1;VCAN;CAPZB;SUMO1;ASPH;NCL;CANX;PLXNB2;AP3S1;CALM2;VCL;NFE2L2;SKP1
facioscapulohumeral muscular dystrophy DOID-11727 human GSE15090 sample 541	11/162	0.0193381	0.180274	0	0	2.0483	8.08195	LIMCH1;NRIP1;COX2;NUCKS1;MALAT1;COX1;NEAT1;C12ORF75;GAPDH;ACTB;ND4
autism spectrum disorder DOID-0060041 human GSE28521 sample 1040	19/341	0.0196732	0.181382	0	0	1.6808	6.60302	CMTM7;ANXA1;WSCD1;CBX1;ITGB2;KCNJ16;PLOD1;FAM129B;MLLT6;FAM111A;VCAN;PLCB4;ABLIM3;ERC1;CIC;SPTBN1;VGLL4;PDE9A;TGM2
Ventricular hypertrophy C0340279 mouse GSE4678 sample 313	18/320	0.020929	0.190864	0	0	1.69683	6.561	ANXA1;PPTC7;UBE2B;MGST3;EMP1;LTBP2;ACTN4;BICC1;FAM129B;CDC34;TNIP1;LONP1;PLS3;PLXNB2;CD9;MAP4;ANP32B;SPTAN1
Neurofibromatosis DOID-8712 mouse GSE1482 sample 667	20/369	0.0221446	0.199778	0	0	1.63501	6.22965	ATP6V1A;NRP1;RNF11;BDNF;RRP1;DYRK1A;ZBTB20;LMO7;KALRN;MAPK10;MORF4L1;NCL;SPOCK2;PLS3;AP3S1;NDUFV2;CALM2;SPTAN1;SPTBN1;ST6GALNAC5
Cancer of prostate C0376358 human GSE3868 sample 135	14/231	0.0223121	0.199148	0	0	1.82824	6.9521	LIMCH1;TNC;PLOD1;PRSS23;ACTB;TRIOBP;TGFBR2;EXT1;NCL;SLIRP;NDUFV2;UBA52;GAPDH;MMADHC
acute myocardial infarction DOID-9408 mouse GSE775 sample 1000	23/443	0.0233381	0.206112	0	0	1.56618	5.88517	ITGB1;HSPA9;ERRFI1;MGEA5;RNF11;PPTC7;UBE2B;BDNF;LIMCH1;EMP1;UQCR11;LMO7;SDHA;ACTG1;MORF4L1;GOLGA4;SUMO1;NCL;FAM120A;TOP1;SLIRP;SPTBN1;LIMS1
SCID - Severe combined immunodeficiency C0085110 mouse GSE3414 sample 201	17/301	0.0235177	0.205535	0	0	1.70372	6.38896	NRP1;SPON1;ANXA1;CRIM1;LMO7;ACTB;BICC1;FAM129B;MORF4L1;SUMO1;TSPAN4;ANP32B;P4HB;TNS3;SPTAN1;SPTBN1;TGM2
Peripheral motor neuropathy C0235025 mouse GSE1947 sample 104	15/256	0.0241347	0.208753	0	0	1.76753	6.58248	ITGB1;APP;ANXA1;EMP1;ARHGAP39;LITAF;ACTG1;EEF1A1;SUMO1;NCL;SPATA13;FAM120A;EZR;CALM2;LIMS1
Atherosclerosis C0004153 human GSE420 sample 234	18/326	0.0246393	0.210943	0	0	1.6656	6.16841	TNC;ADIRF;PLOD1;EEF2;ACTG1;LASP1;RGS3;CAPZB;NCL;TSPAN4;RPL35;FLNA;PLXNB2;ACIN1;GAPDH;AHDC1;TGM2;PLEC
endometrial cancer DOID-1380 human GSE17025 sample 848	18/327	0.0253033	0.214439	0	0	1.66051	6.10539	SPON1;SLC38A1;ANXA1;DDX27;HMGB2;ASAP2;DEK;ACTG1;NCL;SCNN1A;COX3;SMS;COX2;CD9;COX1;CALM2;GAPDH;ND4
adrenoleukodystrophy DOID-10588 human GSE34309 sample 865	15/258	0.0256426	0.215141	0	0	1.75383	6.42517	APP;SLC38A1;ANXA1;VLDLR;TRHDE;AKAP12;AIM1;SALL1;PDGFC;ASXL2;TRIB3;CHAC1;TNS4;EZR;RAI14
pancreatic invasive intraductal papillary-mucinous carcinoma DOID-8150 human GSE19650 sample 610	19/352	0.0262396	0.21797	0	0	1.62827	5.92771	CA12;PIGR;ANXA1;GDA;HMGB2;ADAM10;MIR21;UQCR11;ASAP2;C12ORF75;NEAT1;SUMO1;COX2;PLS3;COX1;AP3S1;SLIRP;CALM2;ND4
Rift Valley fever DOID-1328 mouse GSE18064 sample 875	14/237	0.02703	0.222335	0	0	1.78195	6.43429	APP;LTBP2;ACTN4;DEK;MORF4L1;LASP1;CANX;CD9;AP3S1;P4HB;CALM2;MYH10;SPTBN1;VCL
Essential Thrombocytemia C0040028 human GSE2006 sample 434	22/426	0.0275162	0.224137	0	0	1.55786	5.59737	ITGB1;APP;ABCC4;PANK2;MGST3;HUWE1;UQCR11;ACTB;ACTG1;MORF4L1;SEC14L1;CAPZB;PDGFC;FLNA;CD9;IKBKG;P4HB;ANP32B;GAPDH;CALM2;CDK5RAP2;LIMS1
systemic lupus erythematosus DOID-9074 mouse GSE2376 sample 633	18/331	0.0280952	0.226653	0	0	1.64044	5.85991	LGALS3BP;NRP1;PRKCH;PPTC7;ITGB2;MKI67;NEAT1;EEF2;ACTG1;EEF1A1;SPATA13;FLNA;RBCK1;ANP32B;P4HB;UBA52;GAPDH;RNF111
colon adenoma DOID-0050912 mouse GSE422 sample 650	22/427	0.0281451	0.224893	0	0	1.55422	5.54914	ITGB1;APP;ERRFI1;RNF11;SMARCC1;ANXA1;HSPA4;ZMYND8;HDLBP;EMP1;LMO7;LITAF;ACTG1;EEF1A1;SUMO1;U2AF2;CD9;TOP1;ANP32B;EZR;GAPDH;CALM2
Hepatitis C infection C0019196 human GSE2067 sample 309	21/403	0.0282947	0.223955	0	0	1.57192	5.60403	TOP2A;NXN;MVP;HUWE1;HMGA2;NUCKS1;ACTN4;EEF2;TUBG1;LITAF;ACTB;KTN1;MORF4L1;LASP1;RXRA;ZMIZ1;PLXNB2;RBCK1;ANP32B;AGRN;CALM2
acute myocardial infarction DOID-9408 mouse GSE775 sample 1001	17/308	0.0284957	0.223439	0	0	1.665	5.92408	HSPA9;ITGB1;APP;ERRFI1;NRP1;BDNF;EMP1;SHROOM3;LITAF;ACTB;ACTG1;AKAP12;MORF4L1;GOLGA4;NCL;TOP1;CALM2
Neurological pain disorder C0423704 rat GSE2636 sample 129	15/262	0.0288673	0.224256	0	0	1.72706	6.12249	LGALS3BP;ITGB1;APP;ANXA1;EEF2;LITAF;NR2F6;ACTG1;EEF1A1;COX3;RPL35;COX1;AGRN;TNS3;RAB11FIP3
Barrett's esophagus DOID-9206 human GSE34619 sample 596	17/311	0.0308546	0.237496	0	0	1.64894	5.73579	ABCC3;PIGR;GDA;NEK6;GCNT1;ARHGEF38;MICAL2;PRKCA;HNF1B;PTPRJ;C12ORF75;ARHGAP26;FUT8;VCAN;PLCB4;TNIK;MET
Huntington's disease DOID-12858 mouse GSE3248 sample 728	16/288	0.0312469	0.238328	0	0	1.67588	5.80834	APP;MACF1;MGEA5;PLEKHB2;UBE2B;HUWE1;ZBTB20;DEK;ACTB;ACTG1;EEF1A1;SNRK;FAM102A;NFIB;THRAP3;CALM2
cystic fibrosis DOID-1485 mouse GSE769 sample 1058	17/312	0.0316722	0.239396	0	0	1.64366	5.67442	ABCC3;ERRFI1;PIGR;B4GALT1;EEF2;LITAF;EPN1;ACTG1;EEF1A1;MORF4L1;GOLGA4;ITCH;SUMO1;ANKRD10;PLXNB2;ANP32B;P4HB
cerebral palsy DOID-1969 human GSE31243 sample 878	17/312	0.0316722	0.237259	0	0	1.64366	5.67442	SVIL;ANXA1;LIMCH1;MGST3;HUWE1;PPP2R3A;SDHA;NT5C2;ACTB;ACTG1;EEF1A1;HADHA;MORF4L1;RPL35;P4HB;UBA52;MMADHC
Hypertrophy, Left Ventricular C0149721 mouse GSE2459 sample 382	16/289	0.0321081	0.238395	0	0	1.67009	5.74283	ABCC3;APP;SVIL;USP25;EMP1;EEF2;ACTB;EEF1A1;GOLGA4;TNIP1;NCL;ANP32B;P4HB;GAPDH;SPTBN1;TGM2
type 2 diabetes mellitus DOID-9352 human GSE13760 sample 882	13/220	0.0322397	0.237273	0	0	1.78253	6.1222	APP;HUWE1;EMP1;ACTN4;EEF2;ACTB;AKAP12;EEF1A1;VCAN;FLNA;UBA52;MYH10;SPTBN1
Williams-Beuren syndrome DOID-1928 human GSE16715 sample 903	16/290	0.0329866	0.240659	0	0	1.66433	5.6781	CA12;KIRREL3;BCAR3;ERRFI1;ITGA3;GCNT1;RHBDF2;ADIRF;SHROOM3;ASAP2;TRHDE;THSD4;ANLN;PDGFC;KIF20A;ST6GALNAC5
Huntington's disease DOID-12858 human GSE1751 sample 795	20/387	0.0341926	0.247307	0	0	1.55896	5.26266	RNF11;ANXA1;ADAM10;MIR21;DEK;LITAF;EEF1A1;MORF4L1;RPS14;ZC3H11A;FAM120A;DHX15;PHIP;AP3S1;OGT;GAPDH;CALM2;NFE2L2;SKP1;MEGF9
cerebral palsy DOID-1969 human GSE11686 sample 913	16/292	0.0347964	0.249523	0	0	1.65293	5.55093	LIMCH1;ADIRF;DEK;PPP2R3A;KTN1;EEF1A1;MORF4L1;GOLGA4;DUSP10;ZC3H11A;NCL;PDGFC;RPL35;CALM2;GAPDH;MMADHC
hepatitis C DOID-1883 human GSE20948 sample 600	16/293	0.035728	0.254032	0	0	1.64729	5.48846	HSPA9;SLC38A1;SARS;IRS2;SLC7A11;EEF1A1;VCAN;CBS;LONP1;DHX15;TRIB3;CHAC1;ANP32B;SAE1;GAPDH;MMADHC
atherosclerosis DOID-1936 mouse GSE19286 sample 906	18/341	0.0360807	0.254384	0	0	1.59234	5.28973	LGALS3BP;ITGB2;SGTA;HMGB2;UQCR11;DEK;MKI67;ACTG1;HADHA;MORF4L1;CDC34;U2AF2;ANP32E;OGDH;RPL35;FLNA;P4HB;GAPDH
Acute Lung Injury C0242488 human GSE10474 sample 168	15/270	0.0361999	0.253098	0	0	1.67588	5.56175	MAP2K3;MUS81;SLC38A1;USP16;ZNF282;PNKP;NEDD4L;PRSS23;TRIOBP;FAM111A;ALCAM;ASXL2;TMCC2;SLC16A5;CREB5
Uterine leiomyoma C0042133 human GSE593 sample 16	15/270	0.0361999	0.251006	0	0	1.67588	5.56175	CA12;MACF1;SLC38A1;TNC;MICAL2;UQCR11;ACTN4;PRSS23;MORF4L1;VCAN;PDGFC;SMS;ME3;UBA52;RAI14
Muscular Dystrophy C0026850 mouse GSE2507 sample 232	15/271	0.0372032	0.255848	0	0	1.6697	5.49558	HSPA9;APP;MACF1;NRP1;SVIL;MGEA5;PPTC7;RDX;LMO7;DEK;TFPI;SUMO1;TOP1;CALM2;VCL
Thrombocytopenia C0040034 mouse GSE2527 sample 253	13/226	0.0387363	0.264226	0	0	1.73521	5.64112	SARS;NEAT1;EEF2;EEF1A1;RPS14;FUT8;TSPAN4;RPL35;ANP32B;UBA52;CALM2;GAPDH;TGM2
multiple myeloma DOID-9538 mouse GSE6980 sample 955	15/273	0.0392697	0.265704	0	0	1.65747	5.36572	LGALS3BP;APP;GDA;HMGB2;DEK;MKI67;LITAF;ACTG1;GNA13;SIRPA;TMCC2;ANP32B;P4HB;GAPDH;TGM2
Androgen insensitivity syndrome C0039585 human GSE3871 sample 415	15/273	0.0392697	0.263578	0	0	1.65747	5.36572	NRP2;KIAA1671;MICAL2;PTPRF;CD2AP;DCBLD2;MAPK10;CTIF;FGD6;NFIB;PLS3;TNIK;AGRN;SNTB1;LIMS1
Parkinson's disease DOID-14330 human GSE6613 sample 788	15/274	0.0403332	0.268568	0	0	1.65142	5.30201	SPEN;SLC38A1;ANXA1;MVP;HUWE1;UQCR11;IRS2;LITAF;MORF4L1;SEC14L1;UBN1;FAM120A;UBA52;NDEL1;CREB5
Nemaline Myopathy C0206157 mouse GSE3384 sample 180	21/419	0.0403631	0.266651	0	0	1.5119	4.85294	FTO;SVIL;RNF11;MGST3;SGTA;UQCR11;EEF2;MLLT3;EPN1;ACTG1;NCOR2;EEF1A1;MORF4L1;GOLGA4;NFIB;NCL;OGDH;NDUFV2;GAPDH;LIMS1;PLEC
Familial hypophosphataemic rickets C0733682 mouse GSE868 sample 172	15/276	0.0425218	0.278717	0	0	1.63945	5.17696	ATP6V1A;LGALS3BP;ERRFI1;NRP1;PIGR;PLEKHB2;LMO7;EEF2;ACTB;PTPRF;ACTG1;U2AF2;CD9;TOP1;NFE2L2
endometrial cancer DOID-1380 human GSE17025 sample 846	16/302	0.0449437	0.292308	0	0	1.59819	4.95815	TOP2A;PIGR;SLC38A1;ANXA1;CBX1;C12ORF75;NEAT1;ACTB;NCL;COX3;SMS;COX2;COX1;TOP1;GAPDH;ND4
Fracture of femur C0015802 rat GSE1371 sample 278	18/351	0.0456185	0.294415	0	0	1.54697	4.77618	ATP6V1A;EMP1;ITPR3;EEF2;LITAF;ACTG1;AKAP12;EEF1A1;CANX;RPL35;COX2;CD9;P4HB;EZR;TNS3;UBA52;RAB11FIP3;CALM2
Synovial sarcoma C0039101 mouse GSE6461 sample 22	17/327	0.0459334	0.294184	0	0	1.56826	4.83112	ANXA1;TNC;DEK;FNBP1L;MKI67;EEF2;EEF1A1;RPS14;MORF4L1;TRPS1;RPL35;PLS3;ANP32B;P4HB;UBA52;CALM2;SPTAN1
Down syndrome DOID-14250 human GSE19681 sample 1066	15/280	0.0471499	0.299688	0	0	1.61603	4.93604	MAP2K3;ANXA1;HUWE1;NEAT1;EEF2;ACTB;EEF1A1;DLC1;COX3;COX2;FLNA;COX1;MALAT1;GAPDH;ND4
endometrial cancer DOID-1380 human GSE17025 sample 842	16/305	0.0483604	0.30507	0	0	1.58247	4.79343	LGALS3BP;PIGR;ANXA1;SLC39A10;NEAT1;EEF2;NCL;COX3;SMS;COX2;COX1;TOP1;P4HB;GAPDH;MMADHC;ND4
Huntington's disease DOID-12858 mouse GSE3248 sample 727	18/354	0.0488027	0.305563	0	0	1.53386	4.63221	RNF11;PLEKHB2;UBE2B;SGTA;ARHGAP39;EEF2;ACTB;EEF1A1;MORF4L1;SUMO1;THRAP3;ZC3H11A;SPOCK2;UBTF;HIVEP2;TOP1;GAPDH;SPTBN1
Down syndrome DOID-14250 human GSE16677 sample 1064	19/381	0.051395	0.31941	0	0	1.50434	4.46519	ANXA1;NUCKS1;IRS2;EEF2;ACTB;EEF1A1;DLC1;NCL;CANX;COX3;COX2;FLNA;COX1;MALAT1;ANP32B;SNRPF;P4HB;SLIRP;ND4
Senescence C0001792 rat GSE3531 sample 167	16/308	0.0519562	0.320524	0	0	1.56706	4.63435	ATP6V1A;APP;MGST3;KLC1;ACTB;ACTG1;EEF1A1;MAPK10;RPS14;SPOCK2;CYTB;SPTAN1;GAPDH;ND5;SPTBN2;ND4
CML - Chronic myeloid leukemia C0023473 human GSE11889 sample 403	17/334	0.0539563	0.330433	0	0	1.53539	4.4827	ANXA1;ZBTB20;EEF2;MLLT3;EEF1A1;ARHGAP22;RPS14;LASP1;ZC3H11A;SMS;ANP32B;AP3S1;SNRPF;UBA52;OGT;SKP1;LIMS1
Alexander Disease C0270726 mouse GSE977 sample 87	15/286	0.0547384	0.332794	0	0	1.58213	4.59638	FTO;ITGB1;MACF1;NEK6;RRP1;SHROOM3;ACTB;ACTG1;EEF1A1;GNA13;CAPZB;NCL;PLXNB2;CD9;NFE2L2
Senescence C0001792 human GSE1572 sample 408	15/286	0.0547384	0.330399	0	0	1.58213	4.59638	FNBP1;PLLP;FAM208A;ACTN4;KLC1;RANGAP1;KTN1;CAPZB;SPOCK2;CANX;CD9;ANP32B;AGRN;TGM2;PLEC
Overexertion C0161750 human GSE3606 sample 286	15/286	0.0547384	0.328039	0	0	1.58213	4.59638	ANXA1;ITGB2;HMGB2;MIR21;LITAF;ACTB;EEF1A1;GNA13;LASP1;VCAN;SEC14L1;CALM2;GAPDH;NDEL1;MEGF9
[truncated: 696 more rows]
