# Supplementary material
Source: MDPI journal article supplement (https://www.mdpi.com/2076-3417/11/1/213)
Supplement: s1 [file s1 › genes_human.xlsx]

## Sheet: Sheet1
1	ENSG00000002822
2	ENSG00000002834
3	ENSG00000003436
4	ENSG00000005108
5	ENSG00000005884
6	ENSG00000008952
7	ENSG00000009954
8	ENSG00000010278
9	ENSG00000010818
10	ENSG00000011422
11	ENSG00000011426
12	ENSG00000011454
13	ENSG00000012124
14	ENSG00000013364
15	ENSG00000013619
16	ENSG00000027075
17	ENSG00000031698
18	ENSG00000033170
19	ENSG00000034152
20	ENSG00000035403
21	ENSG00000035928
22	ENSG00000038427
23	ENSG00000039560
24	ENSG00000039650
25	ENSG00000040933
26	ENSG00000041982
27	ENSG00000043143
28	ENSG00000047648
29	ENSG00000047849
30	ENSG00000048707
31	ENSG00000048828
32	ENSG00000049759
33	ENSG00000051382
34	ENSG00000052795
35	ENSG00000053918
36	ENSG00000054118
37	ENSG00000057019
38	ENSG00000058272
39	ENSG00000058453
40	ENSG00000058673
41	ENSG00000060339
42	ENSG00000062716
43	ENSG00000063244
44	ENSG00000063245
45	ENSG00000064042
46	ENSG00000065526
47	ENSG00000065613
48	ENSG00000065883
49	ENSG00000066044
50	ENSG00000066697
51	ENSG00000068724
52	ENSG00000069020
53	ENSG00000069275
54	ENSG00000070159
55	ENSG00000070814
56	ENSG00000071242
57	ENSG00000071655
58	ENSG00000072657
59	ENSG00000073578
60	ENSG00000073614
61	ENSG00000073711
62	ENSG00000074410
63	ENSG00000074416
64	ENSG00000075391
65	ENSG00000075624
66	ENSG00000076685
67	ENSG00000077549
68	ENSG00000078114
69	ENSG00000078747
70	ENSG00000079432
71	ENSG00000080815
72	ENSG00000081026
73	ENSG00000081842
74	ENSG00000082438
75	ENSG00000082805
76	ENSG00000083444
77	ENSG00000084444
78	ENSG00000084754
79	ENSG00000086062
80	ENSG00000086758
81	ENSG00000088448
82	ENSG00000090565
83	ENSG00000090615
84	ENSG00000092201
85	ENSG00000092421
86	ENSG00000092820
87	ENSG00000092853
88	ENSG00000095383
89	ENSG00000096433
90	ENSG00000097007
91	ENSG00000099250
92	ENSG00000099331
93	ENSG00000099381
94	ENSG00000099804
95	ENSG00000099814
96	ENSG00000099889
97	ENSG00000100106
98	ENSG00000100401
99	ENSG00000100596
100	ENSG00000100813
101	ENSG00000100815
102	ENSG00000101040
103	ENSG00000101191
104	ENSG00000101255
105	ENSG00000101333
106	ENSG00000102024
107	ENSG00000102172
108	ENSG00000102934
109	ENSG00000103044
110	ENSG00000103047
111	ENSG00000103326
112	ENSG00000103449
113	ENSG00000104447
114	ENSG00000104611
115	ENSG00000104626
116	ENSG00000104866
117	ENSG00000104969
118	ENSG00000105698
119	ENSG00000105722
120	ENSG00000105738
121	ENSG00000105953
122	ENSG00000105968
123	ENSG00000105976
124	ENSG00000106078
125	ENSG00000106609
126	ENSG00000106617
127	ENSG00000106665
128	ENSG00000106771
129	ENSG00000106780
130	ENSG00000106868
131	ENSG00000107249
132	ENSG00000107338
133	ENSG00000107404
134	ENSG00000107742
135	ENSG00000107864
136	ENSG00000108021
137	ENSG00000108175
138	ENSG00000108312
139	ENSG00000108468
140	ENSG00000108510
141	ENSG00000108557
142	ENSG00000108679
143	ENSG00000108846
144	ENSG00000108854
145	ENSG00000109089
146	ENSG00000109118
147	ENSG00000109339
148	ENSG00000109458
149	ENSG00000109606
150	ENSG00000109685
151	ENSG00000110237
152	ENSG00000110693
153	ENSG00000111142
154	ENSG00000111203
155	ENSG00000111319
156	ENSG00000111371
157	ENSG00000111640
158	ENSG00000112297
159	ENSG00000112984
160	ENSG00000113013
161	ENSG00000113194
162	ENSG00000113361
163	ENSG00000113558
164	ENSG00000113758
165	ENSG00000113946
166	ENSG00000114030
167	ENSG00000114503
168	ENSG00000114573
169	ENSG00000114631
170	ENSG00000114857
171	ENSG00000115053
172	ENSG00000115306
173	ENSG00000115677
174	ENSG00000115762
175	ENSG00000116030
176	ENSG00000116044
177	ENSG00000116285
178	ENSG00000116580
179	ENSG00000117069
180	ENSG00000117114
181	ENSG00000117174
182	ENSG00000117308
183	ENSG00000117394
184	ENSG00000117724
185	ENSG00000117859
186	ENSG00000118007
187	ENSG00000118257
188	ENSG00000118898
189	ENSG00000118900
190	ENSG00000119048
191	ENSG00000119125
192	ENSG00000119383
193	ENSG00000119408
194	ENSG00000119681
195	ENSG00000119705
196	ENSG00000119707
197	ENSG00000120063
198	ENSG00000120254
199	ENSG00000122386
200	ENSG00000122870
201	ENSG00000122966
202	ENSG00000123064
203	ENSG00000123091
204	ENSG00000123200
205	ENSG00000123473
206	ENSG00000124006
207	ENSG00000124228
208	ENSG00000124782
209	ENSG00000124788
210	ENSG00000124789
211	ENSG00000124795
212	ENSG00000124882
213	ENSG00000125257
214	ENSG00000125676
215	ENSG00000125779
216	ENSG00000125826
217	ENSG00000125844
218	ENSG00000126214
219	ENSG00000126653
220	ENSG00000126705
221	ENSG00000126777
222	ENSG00000127022
223	ENSG00000127603
224	ENSG00000128512
225	ENSG00000128585
226	ENSG00000128805
227	ENSG00000128918
228	ENSG00000128923
229	ENSG00000128965
230	ENSG00000129657
231	ENSG00000129667
232	ENSG00000130147
233	ENSG00000130363
234	ENSG00000130382
235	ENSG00000130402
236	ENSG00000130713
237	ENSG00000130762
238	ENSG00000131016
239	ENSG00000131018
240	ENSG00000131023
241	ENSG00000131374
242	ENSG00000131462
243	ENSG00000131746
244	ENSG00000131747
245	ENSG00000131759
246	ENSG00000132361
247	ENSG00000132466
248	ENSG00000132780
249	ENSG00000132823
250	ENSG00000132915
251	ENSG00000133026
252	ENSG00000133069
253	ENSG00000133131
254	ENSG00000133216
255	ENSG00000133816
256	ENSG00000134030
257	ENSG00000134504
258	ENSG00000134531
259	ENSG00000135046
260	ENSG00000135373
261	ENSG00000135709
262	ENSG00000135736
263	ENSG00000135960
264	ENSG00000136068
265	ENSG00000136141
266	ENSG00000136153
267	ENSG00000136155
268	ENSG00000136205
269	ENSG00000136270
270	ENSG00000136273
271	ENSG00000136367
272	ENSG00000136448
273	ENSG00000136709
274	ENSG00000136710
275	ENSG00000136828
276	ENSG00000136830
277	ENSG00000136848
278	ENSG00000136861
279	ENSG00000136937
280	ENSG00000136938
281	ENSG00000136942
282	ENSG00000137251
283	ENSG00000137710
284	ENSG00000137776
285	ENSG00000137831
286	ENSG00000137845
287	ENSG00000137936
288	ENSG00000137942
289	ENSG00000138119
290	ENSG00000138152
291	ENSG00000138175
292	ENSG00000138411
293	ENSG00000138639
294	ENSG00000138771
295	ENSG00000138835
296	ENSG00000139044
297	ENSG00000139343
298	ENSG00000139618
299	ENSG00000139793
300	ENSG00000140718
301	ENSG00000140829
302	ENSG00000141298
303	ENSG00000141556
304	ENSG00000141568
305	ENSG00000141577
306	ENSG00000142192
307	ENSG00000142230
308	ENSG00000142327
309	ENSG00000142627
310	ENSG00000142687
311	ENSG00000142798
312	ENSG00000142949
313	ENSG00000143198
314	ENSG00000143322
315	ENSG00000143401
316	ENSG00000143507
317	ENSG00000143674
318	ENSG00000143850
319	ENSG00000143933
320	ENSG00000143970
321	ENSG00000144401
322	ENSG00000144455
323	ENSG00000144560
324	ENSG00000144642
325	ENSG00000144645
326	ENSG00000144674
327	ENSG00000144677
328	ENSG00000144711
329	ENSG00000144959
330	ENSG00000145041
331	ENSG00000145431
332	ENSG00000145819
333	ENSG00000145833
334	ENSG00000145901
335	ENSG00000146007
336	ENSG00000146038
337	ENSG00000146247
338	ENSG00000146376
339	ENSG00000146426
340	ENSG00000146592
341	ENSG00000146648
342	ENSG00000146950
343	ENSG00000146963
344	ENSG00000147162
345	ENSG00000147799
346	ENSG00000147852
347	ENSG00000147862
348	ENSG00000148120
349	ENSG00000148143
350	ENSG00000148153
351	ENSG00000148229
352	ENSG00000148498
353	ENSG00000148671
354	ENSG00000148773
355	ENSG00000149177
356	ENSG00000149503
357	ENSG00000149571
358	ENSG00000149948
359	ENSG00000150054
360	ENSG00000150093
361	ENSG00000150687
362	ENSG00000150938
363	ENSG00000151012
364	ENSG00000151090
365	ENSG00000151276
366	ENSG00000151376
367	ENSG00000151693
368	ENSG00000151746
369	ENSG00000152127
370	ENSG00000153250
371	ENSG00000153317
372	ENSG00000153551
373	ENSG00000153707
374	ENSG00000153714
375	ENSG00000153822
376	ENSG00000154229
377	ENSG00000154310
378	ENSG00000154358
379	ENSG00000155313
380	ENSG00000155324
381	ENSG00000155621
382	ENSG00000156017
383	ENSG00000156026
384	ENSG00000156052
385	ENSG00000156256
386	ENSG00000156273
387	ENSG00000156453
388	ENSG00000156508
389	ENSG00000157064
390	ENSG00000157306
391	ENSG00000157450
392	ENSG00000157483
393	ENSG00000157540
394	ENSG00000157657
395	ENSG00000157741
396	ENSG00000157827
397	ENSG00000158019
398	ENSG00000158106
399	ENSG00000158161
400	ENSG00000158417
401	ENSG00000158528
402	ENSG00000158545
403	ENSG00000158805
404	ENSG00000158941
405	ENSG00000159140
406	ENSG00000159216
407	ENSG00000160113
408	ENSG00000160145
409	ENSG00000160191
410	ENSG00000160200
411	ENSG00000160207
412	ENSG00000160209
413	ENSG00000160214
414	ENSG00000160255
415	ENSG00000160551
416	ENSG00000160602
417	ENSG00000160746
418	ENSG00000160949
419	ENSG00000161526
420	ENSG00000162337
421	ENSG00000162896
422	ENSG00000163050
423	ENSG00000163507
424	ENSG00000163513
425	ENSG00000163605
426	ENSG00000163638
427	ENSG00000163689
428	ENSG00000163738
429	ENSG00000163788
430	ENSG00000163808
431	ENSG00000163814
432	ENSG00000163866
433	ENSG00000163946
434	ENSG00000163960
435	ENSG00000163995
436	ENSG00000164104
437	ENSG00000164142
438	ENSG00000164190
439	ENSG00000164284
440	ENSG00000164587
441	ENSG00000164741
442	ENSG00000164830
443	ENSG00000165671
444	ENSG00000165699
445	ENSG00000166016
446	ENSG00000166025
447	ENSG00000166035
448	ENSG00000166579
449	ENSG00000166801
450	ENSG00000166949
451	ENSG00000167106
452	ENSG00000167258
453	ENSG00000167306
454	ENSG00000167378
455	ENSG00000167658
456	ENSG00000167693
457	ENSG00000167880
458	ENSG00000168014
459	ENSG00000168077
460	ENSG00000168137
461	ENSG00000168288
462	ENSG00000168502
463	ENSG00000168916
464	ENSG00000169047
465	ENSG00000169247
466	ENSG00000169302
467	ENSG00000169375
468	ENSG00000169756
469	ENSG00000169814
470	ENSG00000169851
471	ENSG00000170017
472	ENSG00000170044
473	ENSG00000170190
474	ENSG00000170265
475	ENSG00000170412
476	ENSG00000170606
477	ENSG00000170638
478	ENSG00000171621
479	ENSG00000171634
480	ENSG00000171681
481	ENSG00000171843
482	ENSG00000172009
483	ENSG00000172164
484	ENSG00000172264
485	ENSG00000172732
486	ENSG00000172775
487	ENSG00000172869
488	ENSG00000172965
489	ENSG00000173077
490	ENSG00000173210
491	ENSG00000173473
492	ENSG00000173575
493	ENSG00000173653
494	ENSG00000173898
495	ENSG00000174243
496	ENSG00000174306
497	ENSG00000175147
498	ENSG00000175193
499	ENSG00000175866
500	ENSG00000175920
501	ENSG00000176108
502	ENSG00000176124
503	ENSG00000176533
504	ENSG00000176697
505	ENSG00000176927
506	ENSG00000177045
507	ENSG00000177200
508	ENSG00000177479
509	ENSG00000177694
510	ENSG00000177879
511	ENSG00000178127
512	ENSG00000178209
513	ENSG00000178852
514	ENSG00000179314
515	ENSG00000179715
516	ENSG00000180263
517	ENSG00000180370
518	ENSG00000180530
519	ENSG00000181555
520	ENSG00000181722
521	ENSG00000182095
522	ENSG00000182132
523	ENSG00000182185
524	ENSG00000182197
525	ENSG00000182628
526	ENSG00000182957
527	ENSG00000182973
528	ENSG00000183495
529	ENSG00000183742
530	ENSG00000183778
531	ENSG00000183853
532	ENSG00000183864
533	ENSG00000184009
534	ENSG00000184363
535	ENSG00000184661
536	ENSG00000185215
537	ENSG00000185291
538	ENSG00000185291
539	ENSG00000185483
540	ENSG00000185504
541	ENSG00000185624
542	ENSG00000185787
543	ENSG00000185950
544	ENSG00000186314
545	ENSG00000186350
546	ENSG00000187079
547	ENSG00000187123
548	ENSG00000187210
549	ENSG00000187239
550	ENSG00000187699
551	ENSG00000187720
552	ENSG00000188026
553	ENSG00000188070
554	ENSG00000188157
555	ENSG00000188158
556	ENSG00000188938
557	ENSG00000189067
558	ENSG00000189283
559	ENSG00000196159
560	ENSG00000196220
561	ENSG00000196365
562	ENSG00000196498
563	ENSG00000196504
564	ENSG00000196535
565	ENSG00000196576
566	ENSG00000196712
567	ENSG00000196850
568	ENSG00000196878
569	ENSG00000196924
570	ENSG00000196935
571	ENSG00000196937
572	ENSG00000196950
573	ENSG00000197070
574	ENSG00000197077
575	ENSG00000197136
576	ENSG00000197226
577	ENSG00000197321
578	ENSG00000197442
579	ENSG00000197694
580	ENSG00000197774
581	ENSG00000197948
582	ENSG00000198000
583	ENSG00000198053
584	ENSG00000198087
585	ENSG00000198363
586	ENSG00000198408
587	ENSG00000198712
588	ENSG00000198727
589	ENSG00000198730
590	ENSG00000198786
591	ENSG00000198804
592	ENSG00000198886
593	ENSG00000198900
594	ENSG00000198938
595	ENSG00000198959
596	ENSG00000204054
597	ENSG00000204120
598	ENSG00000204138
599	ENSG00000204961
600	ENSG00000204962
601	ENSG00000204963
602	ENSG00000204970
603	ENSG00000205213
604	ENSG00000205726
605	ENSG00000213071
606	ENSG00000214063
607	ENSG00000215483
608	ENSG00000221983
609	ENSG00000223653
610	ENSG00000224063
611	ENSG00000224081
612	ENSG00000224271
613	ENSG00000224905
614	ENSG00000225210
615	ENSG00000225330
616	ENSG00000225472
617	ENSG00000225676
618	ENSG00000227036
619	ENSG00000227039
620	ENSG00000227486
621	ENSG00000228065
622	ENSG00000228208
623	ENSG00000228262
624	ENSG00000229656
625	ENSG00000229672
626	ENSG00000230258
627	ENSG00000230590
628	ENSG00000232295
629	ENSG00000233321
630	ENSG00000233559
631	ENSG00000233639
632	ENSG00000233828
633	ENSG00000233860
634	ENSG00000234184
635	ENSG00000235007
636	ENSG00000235142
637	ENSG00000235162
638	ENSG00000235448
639	ENSG00000235904
640	ENSG00000236333
641	ENSG00000236699
642	ENSG00000236790
643	ENSG00000237686
644	ENSG00000238042
645	ENSG00000240891
646	ENSG00000241743
647	ENSG00000242428
648	ENSG00000245532
649	ENSG00000246640
650	ENSG00000247228
651	ENSG00000247572
652	ENSG00000248400
653	ENSG00000248515
654	ENSG00000248647
655	ENSG00000248710
656	ENSG00000248752
657	ENSG00000248874
658	ENSG00000249061
659	ENSG00000249158
660	ENSG00000249209
661	ENSG00000249252
662	ENSG00000249631
663	ENSG00000249859
664	ENSG00000249867
665	ENSG00000250072
666	ENSG00000250120
667	ENSG00000250602
668	ENSG00000250634
669	ENSG00000251002
670	ENSG00000251127
671	ENSG00000251136
672	ENSG00000251201
673	ENSG00000251562
674	ENSG00000253438
675	ENSG00000253582
676	ENSG00000254166
677	ENSG00000254486
678	ENSG00000254733
679	ENSG00000255182
680	ENSG00000255248
681	ENSG00000255496
682	ENSG00000256915
683	ENSG00000257261
684	ENSG00000257315
685	ENSG00000257542
686	ENSG00000257925
687	ENSG00000258077
688	ENSG00000258081
689	ENSG00000259905
690	ENSG00000259986
691	ENSG00000260898
692	ENSG00000261236
693	ENSG00000261553
694	ENSG00000262655
695	ENSG00000262943
696	ENSG00000263072
697	ENSG00000263934
698	ENSG00000264031
699	ENSG00000266074
700	ENSG00000266962
701	ENSG00000267059
702	ENSG00000267737
703	ENSG00000268621
704	ENSG00000269095
705	ENSG00000269113
706	ENSG00000269335
707	ENSG00000269821
708	ENSG00000269955
709	ENSG00000270194
710	ENSG00000270792
711	ENSG00000271880
712	ENSG00000272369
713	ENSG00000272886
714	ENSG00000272904
715	ENSG00000273167
716	ENSG00000273269
717	ENSG00000274012
718	ENSG00000274020
719	ENSG00000275023
720	ENSG00000275410
721	ENSG00000275700
722	ENSG00000275830
723	ENSG00000275989
724	ENSG00000276043
725	ENSG00000279765
726	ENSG00000280441
727	ENSG00000283154
728	ENSG00000283208
729	ENSG00000283486
730	ENSG00000283563
731	ENSG00000283674
732	ENSG00000284461
733	ENSG00000284791
734	ENSG00000284837
735	ENSG00000285051
736	ENSG00000285106
737	ENSG00000285130
738	ENSG00000285218
739	ENSG00000285367
740	ENSG00000285471
741	ENSG00000285756

## Sheet: Sheet2
From	To	Species	Gene Name
ENSG00000131759	RARA	Homo sapiens	retinoic acid receptor alpha(RARA)
ENSG00000198712	COX2	Homo sapiens	cytochrome c oxidase subunit II(COX2)
ENSG00000103326	CAPN15	Homo sapiens	calpain 15(CAPN15)
ENSG00000163995	ABLIM2	Homo sapiens	actin binding LIM protein family member 2(ABLIM2)
ENSG00000099381	SETD1A	Homo sapiens	SET domain containing 1A(SETD1A)
ENSG00000215483	LINC00548	Homo sapiens	long intergenic non-protein coding RNA 548(LINC00548)
ENSG00000163788	SNRK	Homo sapiens	SNF related kinase(SNRK)
ENSG00000101333	PLCB4	Homo sapiens	phospholipase C beta 4(PLCB4)
ENSG00000183495	EP400	Homo sapiens	E1A binding protein p400(EP400)
ENSG00000109118	PHF12	Homo sapiens	PHD finger protein 12(PHF12)
ENSG00000126777	KTN1	Homo sapiens	kinectin 1(KTN1)
ENSG00000088448	ANKRD10	Homo sapiens	ankyrin repeat domain 10(ANKRD10)
ENSG00000084444	FAM234B	Homo sapiens	family with sequence similarity 234 member B(FAM234B)
ENSG00000153250	MIR4785	Homo sapiens	microRNA 4785(MIR4785)
ENSG00000197948	FCHSD1	Homo sapiens	FCH and double SH3 domains 1(FCHSD1)
ENSG00000128585	MKLN1	Homo sapiens	muskelin 1(MKLN1)
ENSG00000185215	TNFAIP2	Homo sapiens	TNF alpha induced protein 2(TNFAIP2)
ENSG00000150938	CRIM1	Homo sapiens	cysteine rich transmembrane BMP regulator 1(CRIM1)
ENSG00000163689	c3orf67	Homo sapiens	chromosome 3 open reading frame 67(C3orf67)
ENSG00000034152	MAP2K3	Homo sapiens	mitogen-activated protein kinase kinase 3(MAP2K3)
ENSG00000136367	ZFHX2	Homo sapiens	zinc finger homeobox 2(ZFHX2)
ENSG00000131746	TNS4	Homo sapiens	tensin 4(TNS4)
ENSG00000254486	LOC105376554	Homo sapiens	uncharacterized LOC105376554(LOC105376554)
ENSG00000198727	CYTB	Homo sapiens	cytochrome b(CYTB)
ENSG00000130382	MLLT1	Homo sapiens	MLLT1, super elongation complex subunit(MLLT1)
ENSG00000133069	TMCC2	Homo sapiens	transmembrane and coiled-coil domain family 2(TMCC2)
ENSG00000131747	TOP2A	Homo sapiens	topoisomerase (DNA) II alpha(TOP2A)
ENSG00000119681	LTBP2	Homo sapiens	latent transforming growth factor beta binding protein 2(LTBP2)
ENSG00000169851	PCDH7	Homo sapiens	protocadherin 7(PCDH7)
ENSG00000196159	FAT4	Homo sapiens	FAT atypical cadherin 4(FAT4)
ENSG00000259905	PWRN1	Homo sapiens	Prader-Willi region non-protein coding RNA 1(PWRN1)
ENSG00000146376	arhgap18	Homo sapiens	Rho GTPase activating protein 18(ARHGAP18)
ENSG00000136155	scel	Homo sapiens	sciellin(SCEL)
ENSG00000170606	HSPA4	Homo sapiens	heat shock protein family A (Hsp70) member 4(HSPA4)
ENSG00000196498	NCOR2	Homo sapiens	nuclear receptor corepressor 2(NCOR2)
ENSG00000048707	VPS13D	Homo sapiens	vacuolar protein sorting 13 homolog D(VPS13D)
ENSG00000137936	BCAR3	Homo sapiens	breast cancer anti-estrogen resistance 3(BCAR3)
ENSG00000156052	GNAQ	Homo sapiens	G protein subunit alpha q(GNAQ)
ENSG00000137831	UACA	Homo sapiens	uveal autoantigen with coiled-coil domains and ankyrin repeats(UACA)
ENSG00000184363	PKP3	Homo sapiens	plakophilin 3(PKP3)
ENSG00000136153	LMO7	Homo sapiens	LIM domain 7(LMO7)
ENSG00000027075	PRKCH	Homo sapiens	protein kinase C eta(PRKCH)
ENSG00000166035	LIPC	Homo sapiens	lipase C, hepatic type(LIPC)
ENSG00000011422	PLAUR	Homo sapiens	plasminogen activator, urokinase receptor(PLAUR)
ENSG00000205213	LGR4	Homo sapiens	leucine rich repeat containing G protein-coupled receptor 4(LGR4)
ENSG00000053918	KCNQ1	Homo sapiens	potassium voltage-gated channel subfamily Q member 1(KCNQ1)
ENSG00000011426	ANLN	Homo sapiens	anillin actin binding protein(ANLN)
ENSG00000213071	LPAL2	Homo sapiens	lipoprotein(a) like 2, pseudogene(LPAL2)
ENSG00000186350	RXRA	Homo sapiens	retinoid X receptor alpha(RXRA)
ENSG00000173575	MIR3175	Homo sapiens	microRNA 3175(MIR3175)
ENSG00000113361	CDH6	Homo sapiens	cadherin 6(CDH6)
ENSG00000198408	MGEA5	Homo sapiens	meningioma expressed antigen 5 (hyaluronidase)(MGEA5)
ENSG00000170190	SLC16A5	Homo sapiens	solute carrier family 16 member 5(SLC16A5)
ENSG00000139343	SNRPF	Homo sapiens	small nuclear ribonucleoprotein polypeptide F(SNRPF)
ENSG00000166949	SMAD3	Homo sapiens	SMAD family member 3(SMAD3)
ENSG00000158805	ZNF276	Homo sapiens	zinc finger protein 276(ZNF276)
ENSG00000062716	MIR21	Homo sapiens	microRNA 21(MIR21)
ENSG00000170638	TRABD	Homo sapiens	TraB domain containing(TRABD)
ENSG00000111319	SCNN1A	Homo sapiens	sodium channel epithelial 1 alpha subunit(SCNN1A)
ENSG00000170265	ZNF282	Homo sapiens	zinc finger protein 282(ZNF282)
ENSG00000074410	CA12	Homo sapiens	carbonic anhydrase 12(CA12)
ENSG00000142192	APP	Homo sapiens	amyloid beta precursor protein(APP)
ENSG00000035928	RFC1	Homo sapiens	replication factor C subunit 1(RFC1)
ENSG00000074416	MGLL	Homo sapiens	monoglyceride lipase(MGLL)
ENSG00000137942	FNBP1L	Homo sapiens	formin binding protein 1 like(FNBP1L)
ENSG00000196878	MIR4260	Homo sapiens	microRNA 4260(MIR4260)
ENSG00000138119	MYOF	Homo sapiens	myoferlin(MYOF)
ENSG00000163960	UBXN7	Homo sapiens	UBX domain protein 7(UBXN7)
ENSG00000197136	PCNX3	Homo sapiens	pecanex homolog 3 (Drosophila)(PCNX3)
ENSG00000073578	SDHA	Homo sapiens	succinate dehydrogenase complex flavoprotein subunit A(SDHA)
ENSG00000130762	ARHGEF16	Homo sapiens	Rho guanine nucleotide exchange factor 16(ARHGEF16)
ENSG00000111203	LOC100507424	Homo sapiens	uncharacterized LOC100507424(LOC100507424)
ENSG00000081842	PCDHA6	Homo sapiens	protocadherin alpha 6(PCDHA6)
ENSG00000150054	MPP7	Homo sapiens	membrane palmitoylated protein 7(MPP7)
ENSG00000099250	NRP1	Homo sapiens	neuropilin 1(NRP1)
ENSG00000198804	COX1	Homo sapiens	cytochrome c oxidase subunit I(COX1)
ENSG00000071655	MBD3	Homo sapiens	methyl-CpG binding domain protein 3(MBD3)
ENSG00000136270	TBRG4	Homo sapiens	transforming growth factor beta regulator 4(TBRG4)
ENSG00000048828	FAM120A	Homo sapiens	family with sequence similarity 120A(FAM120A)
ENSG00000242428	C3orf67-AS1	Homo sapiens	C3orf67 antisense RNA 1(C3orf67-AS1)
ENSG00000113013	HSPA9	Homo sapiens	heat shock protein family A (Hsp70) member 9(HSPA9)
ENSG00000157540	DYRK1A	Homo sapiens	dual specificity tyrosine phosphorylation regulated kinase 1A(DYRK1A)
ENSG00000198900	TOP1	Homo sapiens	topoisomerase (DNA) I(TOP1)
ENSG00000183778	B3GALT5	Homo sapiens	beta-1,3-galactosyltransferase 5(B3GALT5)
ENSG00000136273	HUS1	Homo sapiens	HUS1 checkpoint clamp component(HUS1)
ENSG00000249252	LOC101929095	Homo sapiens	uncharacterized LOC101929095(LOC101929095)
ENSG00000167880	EVPL	Homo sapiens	envoplakin(EVPL)
ENSG00000109685	whsc1	Homo sapiens	Wolf-Hirschhorn syndrome candidate 1(WHSC1)
ENSG00000185504	FAAP100	Homo sapiens	Fanconi anemia core complex associated protein 100(FAAP100)
ENSG00000179314	WSCD1	Homo sapiens	WSC domain containing 1(WSCD1)
ENSG00000163638	ADAMTS9	Homo sapiens	ADAM metallopeptidase with thrombospondin type 1 motif 9(ADAMTS9)
ENSG00000158417	EIF5B	Homo sapiens	eukaryotic translation initiation factor 5B(EIF5B)
ENSG00000136830	FAM129B	Homo sapiens	family with sequence similarity 129 member B(FAM129B)
ENSG00000204970	PCDHA1	Homo sapiens	protocadherin alpha 1(PCDHA1)
ENSG00000144959	NCEH1	Homo sapiens	neutral cholesterol ester hydrolase 1(NCEH1)
ENSG00000204120	GIGYF2	Homo sapiens	GRB10 interacting GYF protein 2(GIGYF2)
ENSG00000111371	SLC38A1	Homo sapiens	solute carrier family 38 member 1(SLC38A1)
ENSG00000146950	SHROOM2	Homo sapiens	shroom family member 2(SHROOM2)
ENSG00000146247	PHIP	Homo sapiens	pleckstrin homology domain interacting protein(PHIP)
ENSG00000136068	FLNB	Homo sapiens	filamin B(FLNB)
ENSG00000163946	FAM208A	Homo sapiens	family with sequence similarity 208 member A(FAM208A)
ENSG00000196850	PPTC7	Homo sapiens	PTC7 protein phosphatase homolog(PPTC7)
ENSG00000249158	PCDHA11	Homo sapiens	protocadherin alpha 11(PCDHA11)
ENSG00000196950	SLC39A10	Homo sapiens	solute carrier family 39 member 10(SLC39A10)
ENSG00000051382	pik3cb	Homo sapiens	phosphatidylinositol-4,5-bisphosphate 3-kinase catalytic subunit beta(PIK3CB)
ENSG00000155313	USP25	Homo sapiens	ubiquitin specific peptidase 25(USP25)
ENSG00000011454	RABGAP1	Homo sapiens	RAB GTPase activating protein 1(RABGAP1)
ENSG00000075624	ACTB	Homo sapiens	actin beta(ACTB)
ENSG00000169814	BTD	Homo sapiens	biotinidase(BTD)
ENSG00000249859	MIR1204	Homo sapiens	microRNA 1204(MIR1204)
ENSG00000135709	KIAA0513	Homo sapiens	KIAA0513(KIAA0513)
ENSG00000100815	TRIP11	Homo sapiens	thyroid hormone receptor interactor 11(TRIP11)
ENSG00000100813	ACIN1	Homo sapiens	apoptotic chromatin condensation inducer 1(ACIN1)
ENSG00000276043	UHRF1	Homo sapiens	ubiquitin like with PHD and ring finger domains 1(UHRF1)
ENSG00000204961	PCDHA9	Homo sapiens	protocadherin alpha 9(PCDHA9)
ENSG00000198959	TGM2	Homo sapiens	transglutaminase 2(TGM2)
ENSG00000173473	SMARCC1	Homo sapiens	SWI/SNF related, matrix associated, actin dependent regulator of chromatin subfamily c member 1(SMARCC1)
ENSG00000204963	PCDHA7	Homo sapiens	protocadherin alpha 7(PCDHA7)
ENSG00000204138	PHACTR4	Homo sapiens	phosphatase and actin regulator 4(PHACTR4)
ENSG00000204962	PCDHA8	Homo sapiens	protocadherin alpha 8(PCDHA8)
ENSG00000177694	NAALADL2	Homo sapiens	N-acetylated alpha-linked acidic dipeptidase like 2(NAALADL2)
ENSG00000146963	LUC7L2	Homo sapiens	LUC7 like 2, pre-mRNA splicing factor(LUC7L2)
ENSG00000117174	ZNHIT6	Homo sapiens	zinc finger HIT-type containing 6(ZNHIT6)
ENSG00000179715	PCED1B	Homo sapiens	PC-esterase domain containing 1B(PCED1B)
ENSG00000130147	SH3BP4	Homo sapiens	SH3 domain binding protein 4(SH3BP4)
ENSG00000262943	ALOX12P2	Homo sapiens	arachidonate 12-lipoxygenase pseudogene 2(ALOX12P2)
ENSG00000164587	RPS14	Homo sapiens	ribosomal protein S14(RPS14)
ENSG00000262655	SPON1	Homo sapiens	spondin 1(SPON1)
ENSG00000136848	DAB2IP	Homo sapiens	DAB2 interacting protein(DAB2IP)
ENSG00000141556	TBCD	Homo sapiens	tubulin folding cofactor D(TBCD)
ENSG00000166801	FAM111A	Homo sapiens	family with sequence similarity 111 member A(FAM111A)
ENSG00000147799	ARHGAP39	Homo sapiens	Rho GTPase activating protein 39(ARHGAP39)
ENSG00000157450	RNF111	Homo sapiens	ring finger protein 111(RNF111)
ENSG00000054118	THRAP3	Homo sapiens	thyroid hormone receptor associated protein 3(THRAP3)
ENSG00000110237	ARHGEF17	Homo sapiens	Rho guanine nucleotide exchange factor 17(ARHGEF17)
ENSG00000139618	brca2	Homo sapiens	BRCA2, DNA repair associated(BRCA2)
ENSG00000158019	BRE	Homo sapiens	brain and reproductive organ-expressed (TNFRSF1A modulator)(BRE)
ENSG00000185624	P4HB	Homo sapiens	prolyl 4-hydroxylase subunit beta(P4HB)
ENSG00000040933	INPP4A	Homo sapiens	inositol polyphosphate-4-phosphatase type I A(INPP4A)
ENSG00000033170	FUT8	Homo sapiens	fucosyltransferase 8(FUT8)
ENSG00000077549	CAPZB	Homo sapiens	capping actin protein of muscle Z-line beta subunit(CAPZB)
ENSG00000126653	Mir423	Homo sapiens	microRNA 423(MIR423)
ENSG00000172732	MUS81	Homo sapiens	MUS81 structure-specific endonuclease subunit(MUS81)
ENSG00000125676	THOC2	Homo sapiens	THO complex 2(THOC2)
ENSG00000104969	SGTA	Homo sapiens	small glutamine rich tetratricopeptide repeat containing alpha(SGTA)
ENSG00000224271	LOC284930	Homo sapiens	uncharacterized LOC284930(LOC284930)
ENSG00000136710	CCDC115	Homo sapiens	coiled-coil domain containing 115(CCDC115)
ENSG00000166025	AMOTL1	Homo sapiens	angiomotin like 1(AMOTL1)
ENSG00000141568	FOXK2	Homo sapiens	forkhead box K2(FOXK2)
ENSG00000137845	ADAM10	Homo sapiens	ADAM metallopeptidase domain 10(ADAM10)
ENSG00000176533	GNG7	Homo sapiens	G protein subunit gamma 7(GNG7)
ENSG00000080815	PSEN1	Homo sapiens	presenilin 1(PSEN1)
ENSG00000150093	ITGB1	Homo sapiens	integrin subunit beta 1(ITGB1)
ENSG00000184009	ACTG1	Homo sapiens	actin gamma 1(ACTG1)
ENSG00000136448	NMT1	Homo sapiens	N-myristoyltransferase 1(NMT1)
ENSG00000092853	CLSPN	Homo sapiens	claspin(CLSPN)
ENSG00000169047	IRS1	Homo sapiens	insulin receptor substrate 1(IRS1)
ENSG00000156273	GRIK1-AS2	Homo sapiens	GRIK1 antisense RNA 2(GRIK1-AS2)
ENSG00000130363	RSPH3	Homo sapiens	radial spoke 3 homolog(RSPH3)
ENSG00000198938	COX3	Homo sapiens	cytochrome c oxidase III(COX3)
ENSG00000047648	ARHGAP6	Homo sapiens	Rho GTPase activating protein 6(ARHGAP6)
ENSG00000151376	ME3	Homo sapiens	malic enzyme 3(ME3)
ENSG00000117394	SLC2A1	Homo sapiens	solute carrier family 2 member 1(SLC2A1)
ENSG00000137710	RDX	Homo sapiens	radixin(RDX)
ENSG00000178852	Efcab13	Homo sapiens	EF-hand calcium binding domain 13(EFCAB13)
ENSG00000197077	KIAA1671	Homo sapiens	KIAA1671(KIAA1671)
ENSG00000148120	mir24-1	Homo sapiens	microRNA 24-1(MIR24-1)
ENSG00000196576	PLXNB2	Homo sapiens	plexin B2(PLXNB2)
ENSG00000090615	GOLGA3	Homo sapiens	golgin A3(GOLGA3)
ENSG00000136861	CDK5RAP2	Homo sapiens	CDK5 regulatory subunit associated protein 2(CDK5RAP2)
ENSG00000128965	CHAC1	Homo sapiens	ChaC glutathione specific gamma-glutamylcyclotransferase 1(CHAC1)
ENSG00000138152	BTBD16	Homo sapiens	BTB domain containing 16(BTBD16)
ENSG00000197070	ARRDC1	Homo sapiens	arrestin domain containing 1(ARRDC1)
ENSG00000182132	KCNIP1	Homo sapiens	potassium voltage-gated channel interacting protein 1(KCNIP1)
ENSG00000148498	PARD3	Homo sapiens	par-3 family cell polarity regulator(PARD3)
ENSG00000047849	MAP4	Homo sapiens	microtubule associated protein 4(MAP4)
ENSG00000155324	GRAMD3	Homo sapiens	GRAM domain containing 3(GRAMD3)
ENSG00000141577	CEP131	Homo sapiens	centrosomal protein 131(CEP131)
ENSG00000148229	POLE3	Homo sapiens	DNA polymerase epsilon 3, accessory subunit(POLE3)
ENSG00000135736	CCDC102A	Homo sapiens	coiled-coil domain containing 102A(CCDC102A)
ENSG00000138835	RGS3	Homo sapiens	regulator of G-protein signaling 3(RGS3)
ENSG00000164190	NIPBL	Homo sapiens	NIPBL, cohesin loading factor(NIPBL)
ENSG00000160551	MIR4523	Homo sapiens	microRNA 4523(MIR4523)
ENSG00000166016	ABTB2	Homo sapiens	ankyrin repeat and BTB domain containing 2(ABTB2)
ENSG00000109089	CDR2L	Homo sapiens	cerebellar degeneration related protein 2 like(CDR2L)
ENSG00000156453	PCDH1	Homo sapiens	protocadherin 1(PCDH1)
ENSG00000257315	ZBED6	Homo sapiens	zinc finger BED-type containing 6(ZBED6)
ENSG00000185483	ROR1	Homo sapiens	receptor tyrosine kinase like orphan receptor 1(ROR1)
ENSG00000227036	LINC00511	Homo sapiens	long intergenic non-protein coding RNA 511(LINC00511)
ENSG00000108854	SMURF2	Homo sapiens	SMAD specific E3 ubiquitin protein ligase 2(SMURF2)
ENSG00000172965	MIR4435-2HG	Homo sapiens	MIR4435-2 host gene(MIR4435-2HG)
ENSG00000108312	UBTF	Homo sapiens	upstream binding transcription factor, RNA polymerase I(UBTF)
ENSG00000064042	LIMCH1	Homo sapiens	LIM and calponin homology domains 1(LIMCH1)
ENSG00000109458	GAB1	Homo sapiens	GRB2 associated binding protein 1(GAB1)
ENSG00000039560	RAI14	Homo sapiens	retinoic acid induced 14(RAI14)
ENSG00000083444	PLOD1	Homo sapiens	procollagen-lysine,2-oxoglutarate 5-dioxygenase 1(PLOD1)
ENSG00000266074	BAHCC1	Homo sapiens	BAH domain and coiled-coil containing 1(BAHCC1)
ENSG00000142230	SAE1	Homo sapiens	SUMO1 activating enzyme subunit 1(SAE1)
ENSG00000274020	LINC01138	Homo sapiens	long intergenic non-protein coding RNA 1138(LINC01138)
ENSG00000164284	grpel2	Homo sapiens	GrpE like 2, mitochondrial(GRPEL2)
ENSG00000181722	ZBTB20	Homo sapiens	zinc finger and BTB domain containing 20(ZBTB20)
ENSG00000227039	ITGB2-AS1	Homo sapiens	ITGB2 antisense RNA 1(ITGB2-AS1)
ENSG00000164142	FAM160A1	Homo sapiens	family with sequence similarity 160 member A1(FAM160A1)
ENSG00000156508	EEF1A1	Homo sapiens	eukaryotic translation elongation factor 1 alpha 1(EEF1A1)
ENSG00000187699	C2orf88	Homo sapiens	chromosome 2 open reading frame 88(C2orf88)
ENSG00000114573	ATP6V1A	Homo sapiens	ATPase H+ transporting V1 subunit A(ATP6V1A)
ENSG00000135373	EHF	Homo sapiens	ETS homologous factor(EHF)
ENSG00000163513	TGFBR2	Homo sapiens	transforming growth factor beta receptor 2(TGFBR2)
ENSG00000013619	MAMLD1	Homo sapiens	mastermind like domain containing 1(MAMLD1)
ENSG00000144711	IQSEC1	Homo sapiens	IQ motif and Sec7 domain 1(IQSEC1)
ENSG00000169756	LIMS1	Homo sapiens	LIM zinc finger domain containing 1(LIMS1)
ENSG00000117069	ST6GALNAC5	Homo sapiens	ST6 N-acetylgalactosaminide alpha-2,6-sialyltransferase 5(ST6GALNAC5)
ENSG00000196712	NF1	Homo sapiens	neurofibromin 1(NF1)
ENSG00000163808	KIF15	Homo sapiens	kinesin family member 15(KIF15)
ENSG00000108468	CBX1	Homo sapiens	chromobox 1(CBX1)
ENSG00000148671	ADIRF	Homo sapiens	adipogenesis regulatory factor(ADIRF)
ENSG00000136709	WDR33	Homo sapiens	WD repeat domain 33(WDR33)
ENSG00000102172	SMS	Homo sapiens	spermine synthase(SMS)
ENSG00000163605	PPP4R2	Homo sapiens	protein phosphatase 4 regulatory subunit 2(PPP4R2)
ENSG00000148143	ZNF462	Homo sapiens	zinc finger protein 462(ZNF462)
ENSG00000013364	MVP	Homo sapiens	major vault protein(MVP)
ENSG00000125257	ABCC4	Homo sapiens	ATP binding cassette subfamily C member 4(ABCC4)
ENSG00000163507	KIAA1524	Homo sapiens	KIAA1524(KIAA1524)
ENSG00000145041	DCAF1	Homo sapiens	DDB1 and CUL4 associated factor 1(DCAF1)
ENSG00000109339	MAPK10	Homo sapiens	mitogen-activated protein kinase 10(MAPK10)
ENSG00000182185	RAD51B	Homo sapiens	RAD51 paralog B(RAD51B)
ENSG00000158545	ZC3H18	Homo sapiens	zinc finger CCCH-type containing 18(ZC3H18)
ENSG00000132915	PDE6A	Homo sapiens	phosphodiesterase 6A(PDE6A)
ENSG00000176927	EFCAB5	Homo sapiens	EF-hand calcium binding domain 5(EFCAB5)
ENSG00000177479	ARIH2	Homo sapiens	ariadne RBR E3 ubiquitin protein ligase 2(ARIH2)
ENSG00000142949	PTPRF	Homo sapiens	protein tyrosine phosphatase, receptor type F(PTPRF)
ENSG00000163814	CDCP1	Homo sapiens	CUB domain containing protein 1(CDCP1)
ENSG00000135046	ANXA1	Homo sapiens	annexin A1(ANXA1)
ENSG00000233639	LINC01158	Homo sapiens	long intergenic non-protein coding RNA 1158(LINC01158)
ENSG00000251136	LOC101929709	Homo sapiens	uncharacterized LOC101929709(LOC101929709)
ENSG00000136205	TNS3	Homo sapiens	tensin 3(TNS3)
ENSG00000132823	OSER1	Homo sapiens	oxidative stress responsive serine rich 1(OSER1)
ENSG00000102934	PLLP	Homo sapiens	plasmolipin(PLLP)
ENSG00000148153	INIP	Homo sapiens	INTS3 and NABP interacting protein(INIP)
ENSG00000079432	CIC	Homo sapiens	capicua transcriptional repressor(CIC)
ENSG00000173210	ABLIM3	Homo sapiens	actin binding LIM protein family member 3(ABLIM3)
ENSG00000155621	C9orf85	Homo sapiens	chromosome 9 open reading frame 85(C9orf85)
ENSG00000129657	SEC14L1	Homo sapiens	SEC14 like lipid binding 1(SEC14L1)
ENSG00000241743	XACT	Homo sapiens	X active specific transcript (non-protein coding)(XACT)
ENSG00000135960	EDAR	Homo sapiens	ectodysplasin A receptor(EDAR)
ENSG00000138411	HECW2	Homo sapiens	HECT, C2 and WW domain containing E3 ubiquitin protein ligase 2(HECW2)
ENSG00000136828	RALGPS1	Homo sapiens	Ral GEF with PH domain and SH3 binding motif 1(RALGPS1)
ENSG00000143850	PLEKHA6	Homo sapiens	pleckstrin homology domain containing A6(PLEKHA6)
ENSG00000198886	ND4	Homo sapiens	NADH dehydrogenase, subunit 4 (complex I)(ND4)
ENSG00000172164	SNTB1	Homo sapiens	syntrophin beta 1(SNTB1)
ENSG00000108175	ZMIZ1	Homo sapiens	zinc finger MIZ-type containing 1(ZMIZ1)
ENSG00000102024	PLS3	Homo sapiens	plastin 3(PLS3)
ENSG00000196535	MYO18A	Homo sapiens	myosin XVIIIA(MYO18A)
ENSG00000117859	OSBPL9	Homo sapiens	oxysterol binding protein like 9(OSBPL9)
ENSG00000274012	RN7SL2	Homo sapiens	RNA, 7SL, cytoplasmic 2(RN7SL2)
ENSG00000198786	ND5	Homo sapiens	NADH dehydrogenase, subunit 5 (complex I)(ND5)
ENSG00000095383	TBC1D2	Homo sapiens	TBC1 domain family member 2(TBC1D2)
ENSG00000172264	MACROD2	Homo sapiens	MACRO domain containing 2(MACROD2)
ENSG00000128512	DOCK4	Homo sapiens	dedicator of cytokinesis 4(DOCK4)
ENSG00000158528	PPP1R9A	Homo sapiens	protein phosphatase 1 regulatory subunit 9A(PPP1R9A)
ENSG00000117724	CENPF	Homo sapiens	centromere protein F(CENPF)
ENSG00000116030	SUMO1	Homo sapiens	small ubiquitin-like modifier 1(SUMO1)
ENSG00000182628	SKA2	Homo sapiens	spindle and kinetochore associated complex subunit 2(SKA2)
ENSG00000108557	RAI1	Homo sapiens	retinoic acid induced 1(RAI1)
ENSG00000086758	HUWE1	Homo sapiens	HECT, UBA and WWE domain containing 1, E3 ubiquitin protein ligase(HUWE1)
ENSG00000182973	CNOT10	Homo sapiens	CCR4-NOT transcription complex subunit 10(CNOT10)
ENSG00000151012	SLC7A11	Homo sapiens	solute carrier family 7 member 11(SLC7A11)
ENSG00000108021	fam208b	Homo sapiens	family with sequence similarity 208 member B(FAM208B)
ENSG00000163738	MTHFD2L	Homo sapiens	methylenetetrahydrofolate dehydrogenase (NADP+ dependent) 2-like(MTHFD2L)
ENSG00000248874	C5orf17	Homo sapiens	chromosome 5 open reading frame 17(C5orf17)
ENSG00000145819	ARHGAP26	Homo sapiens	Rho GTPase activating protein 26(ARHGAP26)
ENSG00000147862	NFIB	Homo sapiens	nuclear factor I B(NFIB)
ENSG00000164104	HMGB2	Homo sapiens	high mobility group box 2(HMGB2)
ENSG00000136937	NCBP1	Homo sapiens	nuclear cap binding protein subunit 1(NCBP1)
ENSG00000136938	ANP32B	Homo sapiens	acidic nuclear phosphoprotein 32 family member B(ANP32B)
ENSG00000116044	NFE2L2	Homo sapiens	nuclear factor, erythroid 2 like 2(NFE2L2)
ENSG00000182095	TNRC18	Homo sapiens	trinucleotide repeat containing 18(TNRC18)
ENSG00000163050	COQ8A	Homo sapiens	coenzyme Q8A(COQ8A)
ENSG00000221983	UBA52	Homo sapiens	ubiquitin A-52 residue ribosomal protein fusion product 1(UBA52)
ENSG00000235162	C12orf75	Homo sapiens	chromosome 12 open reading frame 75(C12orf75)
ENSG00000110693	MIR6073	Homo sapiens	microRNA 6073(MIR6073)
ENSG00000119383	PTPA	Homo sapiens	protein phosphatase 2 phosphatase activator(PTPA)
ENSG00000189067	LITAF	Homo sapiens	lipopolysaccharide induced TNF factor(LITAF)
ENSG00000145833	DDX46	Homo sapiens	DEAD-box helicase 46(DDX46)
ENSG00000122870	BICC1	Homo sapiens	BicC family RNA binding protein 1(BICC1)
ENSG00000182197	EXT1	Homo sapiens	exostosin glycosyltransferase 1(EXT1)
ENSG00000118257	NRP2	Homo sapiens	neuropilin 2(NRP2)
ENSG00000129667	RHBDF2	Homo sapiens	rhomboid 5 homolog 2(RHBDF2)
ENSG00000122386	ZNF205	Homo sapiens	zinc finger protein 205(ZNF205)
ENSG00000049759	NEDD4L	Homo sapiens	neural precursor cell expressed, developmentally down-regulated 4-like, E3 ubiquitin protein ligase(NEDD4L)
ENSG00000169375	SIN3A	Homo sapiens	SIN3 transcription regulator family member A(SIN3A)
ENSG00000180530	NRIP1	Homo sapiens	nuclear receptor interacting protein 1(NRIP1)
ENSG00000116580	GON4L	Homo sapiens	gon-4 like(GON4L)
ENSG00000136942	RPL35	Homo sapiens	ribosomal protein L35(RPL35)
ENSG00000177200	CHD9	Homo sapiens	chromodomain helicase DNA binding protein 9(CHD9)
ENSG00000189283	FHIT	Homo sapiens	fragile histidine triad(FHIT)
ENSG00000170044	ZPLD1	Homo sapiens	zona pellucida like domain containing 1(ZPLD1)
ENSG00000038427	VCAN	Homo sapiens	versican(VCAN)
ENSG00000078114	NEBL	Homo sapiens	nebulette(NEBL)
ENSG00000162896	PIGR	Homo sapiens	polymeric immunoglobulin receptor(PIGR)
ENSG00000261236	MIR7112	Homo sapiens	microRNA 7112(MIR7112)
ENSG00000146592	CREB5	Homo sapiens	cAMP responsive element binding protein 5(CREB5)
ENSG00000097007	abl1	Homo sapiens	ABL proto-oncogene 1, non-receptor tyrosine kinase(ABL1)
ENSG00000235448	LURAP1L-AS1	Homo sapiens	LURAP1L antisense RNA 1(LURAP1L-AS1)
ENSG00000123200	ZC3H13	Homo sapiens	zinc finger CCCH-type containing 13(ZC3H13)
ENSG00000197774	EME2	Homo sapiens	essential meiotic structure-specific endonuclease subunit 2(EME2)
ENSG00000078747	ITCH	Homo sapiens	itchy E3 ubiquitin protein ligase(ITCH)
ENSG00000136141	LRCH1	Homo sapiens	leucine rich repeats and calponin homology domain containing 1(LRCH1)
ENSG00000103047	TANGO6	Homo sapiens	transport and golgi organization 6 homolog(TANGO6)
ENSG00000118007	STAG1	Homo sapiens	stromal antigen 1(STAG1)
ENSG00000139793	MBNL2	Homo sapiens	muscleblind like splicing regulator 2(MBNL2)
ENSG00000106078	COBL	Homo sapiens	cordon-bleu WH2 repeat protein(COBL)
ENSG00000267059	UQCR11	Homo sapiens	ubiquinol-cytochrome c reductase, complex III subunit XI(UQCR11)
ENSG00000063244	U2AF2	Homo sapiens	U2 small nuclear RNA auxiliary factor 2(U2AF2)
ENSG00000143507	DUSP10	Homo sapiens	dual specificity phosphatase 10(DUSP10)
ENSG00000063245	EPN1	Homo sapiens	epsin 1(EPN1)
ENSG00000198730	CTR9	Homo sapiens	CTR9 homolog, Paf1/RNA polymerase II complex component(CTR9)
ENSG00000103044	HAS3	Homo sapiens	hyaluronan synthase 3(HAS3)
ENSG00000130713	EXOSC2	Homo sapiens	exosome component 2(EXOSC2)
ENSG00000162337	LRP5	Homo sapiens	LDL receptor related protein 5(LRP5)
ENSG00000196504	PRPF40A	Homo sapiens	pre-mRNA processing factor 40 homolog A(PRPF40A)
ENSG00000172009	THOP1	Homo sapiens	thimet oligopeptidase 1(THOP1)
ENSG00000149948	hmga2	Homo sapiens	high mobility group AT-hook 2(HMGA2)
ENSG00000170017	ALCAM	Homo sapiens	activated leukocyte cell adhesion molecule(ALCAM)
ENSG00000163866	SMIM12	Homo sapiens	small integral membrane protein 12(SMIM12)
ENSG00000169247	SH3TC2	Homo sapiens	SH3 domain and tetratricopeptide repeats 2(SH3TC2)
ENSG00000168916	ZNF608	Homo sapiens	zinc finger protein 608(ZNF608)
ENSG00000235142	LOC100422737	Homo sapiens	uncharacterized LOC100422737(LOC100422737)
ENSG00000147162	OGT	Homo sapiens	O-linked N-acetylglucosamine (GlcNAc) transferase(OGT)
ENSG00000234184	LOC101927412	Homo sapiens	uncharacterized LOC101927412(LOC101927412)
ENSG00000118900	UBN1	Homo sapiens	ubinuclein 1(UBN1)
ENSG00000107338	SHB	Homo sapiens	SH2 domain containing adaptor protein B(SHB)
ENSG00000142627	EPHA2	Homo sapiens	EPH receptor A2(EPHA2)
ENSG00000171681	ATF7IP	Homo sapiens	activating transcription factor 7 interacting protein(ATF7IP)
ENSG00000181555	SETD2	Homo sapiens	SET domain containing 2(SETD2)
ENSG00000173653	RCE1	Homo sapiens	Ras converting CAAX endopeptidase 1(RCE1)
ENSG00000108846	ABCC3	Homo sapiens	ATP binding cassette subfamily C member 3(ABCC3)
ENSG00000103449	SALL1	Homo sapiens	spalt like transcription factor 1(SALL1)
ENSG00000113194	FAF2	Homo sapiens	Fas associated factor family member 2(FAF2)
ENSG00000188938	FAM120AOS	Homo sapiens	family with sequence similarity 120A opposite strand(FAM120AOS)
ENSG00000182957	SPATA13	Homo sapiens	spermatogenesis associated 13(SPATA13)
ENSG00000069020	MAST4	Homo sapiens	microtubule associated serine/threonine kinase family member 4(MAST4)
ENSG00000147852	VLDLR	Homo sapiens	very low density lipoprotein receptor(VLDLR)
ENSG00000058272	PPP1R12A	Homo sapiens	protein phosphatase 1 regulatory subunit 12A(PPP1R12A)
ENSG00000071242	RPS6KA2	Homo sapiens	ribosomal protein S6 kinase A2(RPS6KA2)
ENSG00000251201	TMED7-TICAM2	Homo sapiens	TMED7-TICAM2 readthrough(TMED7-TICAM2)
ENSG00000154310	TNIK	Homo sapiens	TRAF2 and NCK interacting kinase(TNIK)
ENSG00000225210	DUXAP10	Homo sapiens	double homeobox A pseudogene 10(DUXAP10)
ENSG00000168077	SCARA3	Homo sapiens	scavenger receptor class A member 3(SCARA3)
ENSG00000245532	NEAT1	Homo sapiens	nuclear paraspeckle assembly transcript 1 (non-protein coding)(NEAT1)
ENSG00000187720	THSD4	Homo sapiens	thrombospondin type 1 domain containing 4(THSD4)
ENSG00000160191	PDE9A	Homo sapiens	phosphodiesterase 9A(PDE9A)
ENSG00000114503	NCBP2	Homo sapiens	nuclear cap binding protein subunit 2(NCBP2)
ENSG00000197321	svil	Homo sapiens	supervillin(SVIL)
ENSG00000131374	TBC1D5	Homo sapiens	TBC1 domain family member 5(TBC1D5)
ENSG00000144677	CTDSPL	Homo sapiens	CTD small phosphatase like(CTDSPL)
ENSG00000160255	ITGB2	Homo sapiens	integrin subunit beta 2(ITGB2)
ENSG00000104447	TRPS1	Homo sapiens	transcriptional repressor GATA binding 1(TRPS1)
ENSG00000168137	SETD5	Homo sapiens	SET domain containing 5(SETD5)
ENSG00000228262	LINC01320	Homo sapiens	long intergenic non-protein coding RNA 1320(LINC01320)
ENSG00000132361	CLUH	Homo sapiens	clustered mitochondria homolog(CLUH)
ENSG00000173898	SPTBN2	Homo sapiens	spectrin beta, non-erythrocytic 2(SPTBN2)
ENSG00000134030	CTIF	Homo sapiens	cap binding complex dependent translation initiation factor(CTIF)
ENSG00000120063	GNA13	Homo sapiens	G protein subunit alpha 13(GNA13)
ENSG00000171621	SPSB1	Homo sapiens	splA/ryanodine receptor domain and SOCS box containing 1(SPSB1)
ENSG00000164830	OXR1	Homo sapiens	oxidation resistance 1(OXR1)
ENSG00000263934	SNORD3A	Homo sapiens	small nucleolar RNA, C/D box 3A(SNORD3A)
ENSG00000188026	RILPL1	Homo sapiens	Rab interacting lysosomal protein like 1(RILPL1)
ENSG00000275700	AATF	Homo sapiens	apoptosis antagonizing transcription factor(AATF)
ENSG00000106771	tmem245	Homo sapiens	transmembrane protein 245(TMEM245)
ENSG00000144674	GOLGA4	Homo sapiens	golgin A4(GOLGA4)
ENSG00000066044	ELAVL1	Homo sapiens	ELAV like RNA binding protein 1(ELAVL1)
ENSG00000178127	NDUFV2	Homo sapiens	NADH:ubiquinone oxidoreductase core subunit V2(NDUFV2)
ENSG00000120254	MTHFD1L	Homo sapiens	methylenetetrahydrofolate dehydrogenase (NADP+ dependent) 1-like(MTHFD1L)
ENSG00000250634	LINC01182	Homo sapiens	long intergenic non-protein coding RNA 1182(LINC01182)
ENSG00000117114	ADGRL2	Homo sapiens	adhesion G protein-coupled receptor L2(ADGRL2)
ENSG00000144401	METTL21A	Homo sapiens	methyltransferase like 21A(METTL21A)
ENSG00000009954	BAZ1B	Homo sapiens	bromodomain adjacent to zinc finger domain 1B(BAZ1B)
ENSG00000114631	PODXL2	Homo sapiens	podocalyxin like 2(PODXL2)
ENSG00000142798	HSPG2	Homo sapiens	heparan sulfate proteoglycan 2(HSPG2)
ENSG00000143401	ANP32E	Homo sapiens	acidic nuclear phosphoprotein 32 family member E(ANP32E)
ENSG00000086062	B4GALT1	Homo sapiens	beta-1,4-galactosyltransferase 1(B4GALT1)
ENSG00000145901	TNIP1	Homo sapiens	TNFAIP3 interacting protein 1(TNIP1)
ENSG00000122966	MIR1178	Homo sapiens	microRNA 1178(MIR1178)
ENSG00000084754	HADHA	Homo sapiens	hydroxyacyl-CoA dehydrogenase/3-ketoacyl-CoA thiolase/enoyl-CoA hydratase (trifunctional protein), alpha subunit(HADHA)
ENSG00000123064	DDX54	Homo sapiens	DEAD-box helicase 54(DDX54)
ENSG00000187079	TEAD1	Homo sapiens	TEA domain transcription factor 1(TEAD1)
ENSG00000106780	MEGF9	Homo sapiens	multiple EGF like domains 9(MEGF9)
ENSG00000171634	BPTF	Homo sapiens	bromodomain PHD finger transcription factor(BPTF)
ENSG00000154229	PRKCA	Homo sapiens	protein kinase C alpha(PRKCA)
ENSG00000035403	VCL	Homo sapiens	vinculin(VCL)
ENSG00000168288	MMADHC	Homo sapiens	methylmalonic aciduria and homocystinuria, cblD type(MMADHC)
ENSG00000247572	CKMT2-AS1	Homo sapiens	CKMT2 antisense RNA 1(CKMT2-AS1)
ENSG00000124228	DDX27	Homo sapiens	DEAD-box helicase 27(DDX27)
ENSG00000171843	MLLT3	Homo sapiens	MLLT3, super elongation complex subunit(MLLT3)
ENSG00000104626	ERI1	Homo sapiens	exoribonuclease 1(ERI1)
ENSG00000197442	MAP3K5	Homo sapiens	mitogen-activated protein kinase kinase kinase 5(MAP3K5)
ENSG00000119048	UBE2B	Homo sapiens	ubiquitin conjugating enzyme E2 B(UBE2B)
ENSG00000099889	arvcf	Homo sapiens	armadillo repeat gene deleted in velocardiofacial syndrome(ARVCF)
ENSG00000115677	HDLBP	Homo sapiens	high density lipoprotein binding protein(HDLBP)
ENSG00000149177	PTPRJ	Homo sapiens	protein tyrosine phosphatase, receptor type J(PTPRJ)
ENSG00000116285	ERRFI1	Homo sapiens	ERBB receptor feedback inhibitor 1(ERRFI1)
ENSG00000174243	DDX23	Homo sapiens	DEAD-box helicase 23(DDX23)
ENSG00000010818	HIVEP2	Homo sapiens	human immunodeficiency virus type I enhancer binding protein 2(HIVEP2)
ENSG00000167306	MYO5B	Homo sapiens	myosin VB(MYO5B)
ENSG00000269113	TRABD2B	Homo sapiens	TraB domain containing 2B(TRABD2B)
ENSG00000237686	LOC101929705	Homo sapiens	uncharacterized LOC101929705(LOC101929705)
ENSG00000151693	ASAP2	Homo sapiens	ArfGAP with SH3 domain, ankyrin repeat and PH domain 2(ASAP2)
ENSG00000039650	PNKP	Homo sapiens	polynucleotide kinase 3'-phosphatase(PNKP)
ENSG00000052795	FNIP2	Homo sapiens	folliculin interacting protein 2(FNIP2)
ENSG00000143933	CALM2	Homo sapiens	calmodulin 2(CALM2)
ENSG00000134504	KCTD1	Homo sapiens	potassium channel tetramerization domain containing 1(KCTD1)
ENSG00000123473	STIL	Homo sapiens	SCL/TAL1 interrupting locus(STIL)
ENSG00000108510	MED13	Homo sapiens	mediator complex subunit 13(MED13)
ENSG00000107742	SPOCK2	Homo sapiens	SPARC/osteonectin, cwcv and kazal like domains proteoglycan 2(SPOCK2)
ENSG00000173077	DEC1	Homo sapiens	deleted in esophageal cancer 1(DEC1)
ENSG00000031698	SARS	Homo sapiens	seryl-tRNA synthetase(SARS)
ENSG00000169302	STK32A	Homo sapiens	serine/threonine kinase 32A(STK32A)
ENSG00000104611	SH2D4A	Homo sapiens	SH2 domain containing 4A(SH2D4A)
ENSG00000132780	NASP	Homo sapiens	nuclear autoantigenic sperm protein(NASP)
ENSG00000144560	VGLL4	Homo sapiens	vestigial like family member 4(VGLL4)
ENSG00000161526	SAP30BP	Homo sapiens	SAP30 binding protein(SAP30BP)
ENSG00000065883	CDK13	Homo sapiens	cyclin dependent kinase 13(CDK13)
ENSG00000107404	MIR6808	Homo sapiens	microRNA 6808(MIR6808)
ENSG00000176124	DLEU1	Homo sapiens	deleted in lymphocytic leukemia 1(DLEU1)
ENSG00000075391	RASAL2	Homo sapiens	RAS protein activator like 2(RASAL2)
ENSG00000107249	GLIS3	Homo sapiens	GLIS family zinc finger 3(GLIS3)
ENSG00000057019	DCBLD2	Homo sapiens	discoidin, CUB and LCCL domain containing 2(DCBLD2)
ENSG00000154358	OBSCN	Homo sapiens	obscurin, cytoskeletal calmodulin and titin-interacting RhoGEF(OBSCN)
ENSG00000146648	EGFR	Homo sapiens	epidermal growth factor receptor(EGFR)
ENSG00000269335	IKBKG	Homo sapiens	inhibitor of kappa light polypeptide gene enhancer in B-cells, kinase gamma(IKBKG)
ENSG00000002822	MAD1L1	Homo sapiens	MAD1 mitotic arrest deficient like 1(MAD1L1)
ENSG00000236333	TRHDE-AS1	Homo sapiens	TRHDE antisense RNA 1(TRHDE-AS1)
ENSG00000101191	DIDO1	Homo sapiens	death inducer-obliterator 1(DIDO1)
ENSG00000060339	CCAR1	Homo sapiens	cell division cycle and apoptosis regulator 1(CCAR1)
ENSG00000111640	GAPDH	Homo sapiens	glyceraldehyde-3-phosphate dehydrogenase(GAPDH)
ENSG00000076685	NT5C2	Homo sapiens	5'-nucleotidase, cytosolic II(NT5C2)
ENSG00000157741	UBN2	Homo sapiens	ubinuclein 2(UBN2)
ENSG00000005108	THSD7A	Homo sapiens	thrombospondin type 1 domain containing 7A(THSD7A)
ENSG00000214063	TSPAN4	Homo sapiens	tetraspanin 4(TSPAN4)
ENSG00000003436	TFPI	Homo sapiens	tissue factor pathway inhibitor(TFPI)
ENSG00000092421	SEMA6A	Homo sapiens	semaphorin 6A(SEMA6A)
ENSG00000188158	NHS	Homo sapiens	NHS actin remodeling regulator(NHS)
ENSG00000188157	AGRN	Homo sapiens	agrin(AGRN)
ENSG00000069275	NUCKS1	Homo sapiens	nuclear casein kinase and cyclin dependent kinase substrate 1(NUCKS1)
ENSG00000175147	TMEM51-AS1	Homo sapiens	TMEM51 antisense RNA 1(TMEM51-AS1)
ENSG00000065526	SPEN	Homo sapiens	spen family transcriptional repressor(SPEN)
ENSG00000070814	TCOF1	Homo sapiens	treacle ribosome biogenesis factor 1(TCOF1)
ENSG00000002834	LASP1	Homo sapiens	LIM and SH3 protein 1(LASP1)
ENSG00000113758	DBN1	Homo sapiens	drebrin 1(DBN1)
ENSG00000260898	ADPGK-AS1	Homo sapiens	ADPGK antisense RNA 1(ADPGK-AS1)
ENSG00000115053	NCL	Homo sapiens	nucleolin(NCL)
ENSG00000143198	MGST3	Homo sapiens	microsomal glutathione S-transferase 3(MGST3)
ENSG00000157064	NMNAT2	Homo sapiens	nicotinamide nucleotide adenylyltransferase 2(NMNAT2)
ENSG00000108679	LGALS3BP	Homo sapiens	galectin 3 binding protein(LGALS3BP)
ENSG00000126214	KLC1	Homo sapiens	kinesin light chain 1(KLC1)
ENSG00000144642	RBMS3	Homo sapiens	RNA binding motif single stranded interacting protein 3(RBMS3)
ENSG00000144645	OSBPL10	Homo sapiens	oxysterol binding protein like 10(OSBPL10)
ENSG00000198053	SIRPA	Homo sapiens	signal regulatory protein alpha(SIRPA)
ENSG00000070159	PTPN3	Homo sapiens	protein tyrosine phosphatase, non-receptor type 3(PTPN3)
ENSG00000176108	CHMP6	Homo sapiens	charged multivesicular body protein 6(CHMP6)
ENSG00000159140	MIR6501	Homo sapiens	microRNA 6501(MIR6501)
ENSG00000131016	AKAP12	Homo sapiens	A-kinase anchoring protein 12(AKAP12)
ENSG00000184661	CDCA2	Homo sapiens	cell division cycle associated 2(CDCA2)
ENSG00000131018	SYNE1	Homo sapiens	spectrin repeat containing nuclear envelope protein 1(SYNE1)
ENSG00000168014	C2CD3	Homo sapiens	C2 calcium dependent domain containing 3(C2CD3)
ENSG00000167693	NXN	Homo sapiens	nucleoredoxin(NXN)
ENSG00000105698	USF2	Homo sapiens	upstream transcription factor 2, c-fos interacting(USF2)
ENSG00000100596	SPTLC2	Homo sapiens	serine palmitoyltransferase long chain base subunit 2(SPTLC2)
ENSG00000157827	FMNL2	Homo sapiens	formin like 2(FMNL2)
ENSG00000185291	IL3RA	Homo sapiens	interleukin 3 receptor subunit alpha(IL3RA)
ENSG00000133216	EPHB2	Homo sapiens	EPH receptor B2(EPHB2)
ENSG00000148773	MKI67	Homo sapiens	marker of proliferation Ki-67(MKI67)
ENSG00000172869	DMXL1	Homo sapiens	Dmx like 1(DMXL1)
ENSG00000142687	KIAA0319L	Homo sapiens	KIAA0319 like(KIAA0319L)
ENSG00000068724	TTC7A	Homo sapiens	tetratricopeptide repeat domain 7A(TTC7A)
ENSG00000143674	MLK4	Homo sapiens	mixed lineage kinase 4(MLK4)
ENSG00000174306	ZHX3	Homo sapiens	zinc fingers and homeoboxes 3(ZHX3)
ENSG00000247228	LOC400541	Homo sapiens	uncharacterized LOC400541(LOC400541)
ENSG00000010278	CD9	Homo sapiens	CD9 molecule(CD9)
ENSG00000143970	ASXL2	Homo sapiens	additional sex combs like 2, transcriptional regulator(ASXL2)
ENSG00000198087	CD2AP	Homo sapiens	CD2 associated protein(CD2AP)
ENSG00000041982	TNC	Homo sapiens	tenascin C(TNC)
ENSG00000124006	OBSL1	Homo sapiens	obscurin like 1(OBSL1)
ENSG00000275023	MLLT6	Homo sapiens	MLLT6, PHD finger domain containing(MLLT6)
ENSG00000185787	MORF4L1	Homo sapiens	mortality factor 4 like 1(MORF4L1)
ENSG00000115762	plekhb2	Homo sapiens	pleckstrin homology domain containing B2(PLEKHB2)
ENSG00000188070	c11orf95	Homo sapiens	chromosome 11 open reading frame 95(C11orf95)
ENSG00000160145	KALRN	Homo sapiens	kalirin, RhoGEF kinase(KALRN)
ENSG00000246640	LOC284080	Homo sapiens	uncharacterized LOC284080(LOC284080)
ENSG00000160949	TONSL	Homo sapiens	tonsoku-like, DNA repair protein(TONSL)
ENSG00000275410	HNF1B	Homo sapiens	HNF1 homeobox B(HNF1B)
ENSG00000197694	SPTAN1	Homo sapiens	spectrin alpha, non-erythrocytic 1(SPTAN1)
ENSG00000114857	NKTR	Homo sapiens	natural killer cell triggering receptor(NKTR)
ENSG00000106665	CLIP2	Homo sapiens	CAP-Gly domain containing linker protein 2(CLIP2)
ENSG00000105976	MET	Homo sapiens	MET proto-oncogene, receptor tyrosine kinase(MET)
ENSG00000119125	GDA	Homo sapiens	guanine deaminase(GDA)
ENSG00000156256	USP16	Homo sapiens	ubiquitin specific peptidase 16(USP16)
ENSG00000115306	SPTBN1	Homo sapiens	spectrin beta, non-erythrocytic 1(SPTBN1)
ENSG00000140829	DHX38	Homo sapiens	DEAH-box helicase 38(DHX38)
ENSG00000175193	PARL	Homo sapiens	presenilin associated rhomboid like(PARL)
ENSG00000158161	EYA3	Homo sapiens	EYA transcriptional coactivator and phosphatase 3(EYA3)
ENSG00000140718	FTO	Homo sapiens	FTO, alpha-ketoglutarate dependent dioxygenase(FTO)
ENSG00000240891	PLCXD2	Homo sapiens	phosphatidylinositol specific phospholipase C X domain containing 2(PLCXD2)
ENSG00000073711	PPP2R3A	Homo sapiens	protein phosphatase 2 regulatory subunit B''alpha(PPP2R3A)
ENSG00000125844	RRBP1	Homo sapiens	ribosome binding protein 1(RRBP1)
ENSG00000065613	SLK	Homo sapiens	STE20 like kinase(SLK)
ENSG00000160113	NR2F6	Homo sapiens	nuclear receptor subfamily 2 group F member 6(NR2F6)
ENSG00000124782	RREB1	Homo sapiens	ras responsive element binding protein 1(RREB1)
ENSG00000124788	ATXN1	Homo sapiens	ataxin 1(ATXN1)
ENSG00000126705	AHDC1	Homo sapiens	AT-hook DNA binding motif containing 1(AHDC1)
ENSG00000124789	NUP153	Homo sapiens	nucleoporin 153(NUP153)
ENSG00000273167	SPATA13	Homo sapiens	spermatogenesis associated 13(SPATA13)
ENSG00000151276	MAGI1	Homo sapiens	membrane associated guanylate kinase, WW and PDZ domain containing 1(MAGI1)
ENSG00000100401	RANGAP1	Homo sapiens	Ran GTPase activating protein 1(RANGAP1)
ENSG00000072657	TRHDE	Homo sapiens	thyrotropin releasing hormone degrading enzyme(TRHDE)
ENSG00000101040	ZMYND8	Homo sapiens	zinc finger MYND-type containing 8(ZMYND8)
ENSG00000058453	CROCC	Homo sapiens	ciliary rootlet coiled-coil, rootletin(CROCC)
ENSG00000073614	KDM5A	Homo sapiens	lysine demethylase 5A(KDM5A)
ENSG00000105968	H2AFV	Homo sapiens	H2A histone family member V(H2AFV)
ENSG00000157657	ZNF618	Homo sapiens	zinc finger protein 618(ZNF618)
ENSG00000106609	TMEM248	Homo sapiens	transmembrane protein 248(TMEM248)
ENSG00000139044	B4GALNT3	Homo sapiens	beta-1,4-N-acetyl-galactosaminyltransferase 3(B4GALNT3)
ENSG00000167378	IRGQ	Homo sapiens	immunity related GTPase Q(IRGQ)
ENSG00000090565	RAB11FIP3	Homo sapiens	RAB11 family interacting protein 3(RAB11FIP3)
ENSG00000099814	CEP170B	Homo sapiens	centrosomal protein 170B(CEP170B)
ENSG00000131023	LATS1	Homo sapiens	large tumor suppressor kinase 1(LATS1)
ENSG00000153822	kcnj16	Homo sapiens	potassium voltage-gated channel subfamily J member 16(KCNJ16)
ENSG00000180370	PAK2	Homo sapiens	p21 (RAC1) activated kinase 2(PAK2)
ENSG00000165671	NSD1	Homo sapiens	nuclear receptor binding SET domain protein 1(NSD1)
ENSG00000117308	GALE	Homo sapiens	UDP-galactose-4-epimerase(GALE)
ENSG00000152127	MGAT5	Homo sapiens	mannosyl (alpha-1,6-)-glycoprotein beta-1,6-N-acetyl-glucosaminyltransferase(MGAT5)
ENSG00000153707	PTPRD	Homo sapiens	protein tyrosine phosphatase, receptor type D(PTPRD)
ENSG00000138175	ARL3	Homo sapiens	ADP ribosylation factor like GTPase 3(ARL3)
ENSG00000105953	OGDH	Homo sapiens	oxoglutarate dehydrogenase(OGDH)
ENSG00000119707	RBM25	Homo sapiens	RNA binding motif protein 25(RBM25)
ENSG00000106617	PRKAG2	Homo sapiens	protein kinase AMP-activated non-catalytic subunit gamma 2(PRKAG2)
ENSG00000119705	SLIRP	Homo sapiens	SRA stem-loop interacting RNA binding protein(SLIRP)
ENSG00000185950	IRS2	Homo sapiens	insulin receptor substrate 2(IRS2)
ENSG00000149503	INCENP	Homo sapiens	inner centromere protein(INCENP)
ENSG00000272886	DCP1A	Homo sapiens	decapping mRNA 1A(DCP1A)
ENSG00000128923	FAM63B	Homo sapiens	family with sequence similarity 63 member B(FAM63B)
ENSG00000143322	ABL2	Homo sapiens	ABL proto-oncogene 2, non-receptor tyrosine kinase(ABL2)
ENSG00000177045	SIX5	Homo sapiens	SIX homeobox 5(SIX5)
ENSG00000141298	SSH2	Homo sapiens	slingshot protein phosphatase 2(SSH2)
ENSG00000145431	PDGFC	Homo sapiens	platelet derived growth factor C(PDGFC)
ENSG00000186314	PRELID2	Homo sapiens	PRELI domain containing 2(PRELID2)
ENSG00000144455	SUMF1	Homo sapiens	sulfatase modifying factor 1(SUMF1)
ENSG00000096433	ITPR3	Homo sapiens	inositol 1,4,5-trisphosphate receptor type 3(ITPR3)
ENSG00000099804	CDC34	Homo sapiens	cell division cycle 34(CDC34)
ENSG00000082438	COBLL1	Homo sapiens	cordon-bleu WH2 repeat protein like 1(COBLL1)
ENSG00000125826	RBCK1	Homo sapiens	RANBP2-type and C3HC4-type zinc finger containing 1(RBCK1)
ENSG00000151090	THRB	Homo sapiens	thyroid hormone receptor beta(THRB)
ENSG00000167658	EEF2	Homo sapiens	eukaryotic translation elongation factor 2(EEF2)
ENSG00000196935	SRGAP1	Homo sapiens	SLIT-ROBO Rho GTPase activating protein 1(SRGAP1)
ENSG00000157483	MYO1E	Homo sapiens	myosin IE(MYO1E)
ENSG00000196937	FAM3C	Homo sapiens	family with sequence similarity 3 member C(FAM3C)
ENSG00000153714	LURAP1L	Homo sapiens	leucine rich adaptor protein 1 like(LURAP1L)
ENSG00000119408	NEK6	Homo sapiens	NIMA related kinase 6(NEK6)
ENSG00000180263	FGD6	Homo sapiens	FYVE, RhoGEF and PH domain containing 6(FGD6)
ENSG00000167106	FAM102A	Homo sapiens	family with sequence similarity 102 member A(FAM102A)
ENSG00000160200	CBS	Homo sapiens	cystathionine-beta-synthase(CBS)
ENSG00000175866	BAIAP2	Homo sapiens	BAI1 associated protein 2(BAIAP2)
ENSG00000146007	ZMAT2	Homo sapiens	zinc finger matrin-type 2(ZMAT2)
ENSG00000251562	MALAT1	Homo sapiens	metastasis associated lung adenocarcinoma transcript 1 (non-protein coding)(MALAT1)
ENSG00000167258	CDK12	Homo sapiens	cyclin dependent kinase 12(CDK12)
ENSG00000128918	ALDH1A2	Homo sapiens	aldehyde dehydrogenase 1 family member A2(ALDH1A2)
ENSG00000172775	FAM192A	Homo sapiens	family with sequence similarity 192 member A(FAM192A)
ENSG00000125779	PANK2	Homo sapiens	pantothenate kinase 2(PANK2)
ENSG00000153317	ASAP1	Homo sapiens	ArfGAP with SH3 domain, ankyrin repeat and PH domain 1(ASAP1)
ENSG00000257542	OR7E47P	Homo sapiens	olfactory receptor family 7 subfamily E member 47 pseudogene(OR7E47P)
ENSG00000236699	ARHGEF38	Homo sapiens	Rho guanine nucleotide exchange factor 38(ARHGEF38)
ENSG00000165699	TSC1	Homo sapiens	tuberous sclerosis 1(TSC1)
ENSG00000151746	BICD1	Homo sapiens	BICD cargo adaptor 1(BICD1)
ENSG00000159216	LOC100506403	Homo sapiens	uncharacterized LOC100506403(LOC100506403)
ENSG00000124795	DEK	Homo sapiens	DEK proto-oncogene(DEK)
ENSG00000066697	MSANTD3	Homo sapiens	Myb/SANT DNA binding domain containing 3(MSANTD3)
ENSG00000196220	SRGAP3	Homo sapiens	SLIT-ROBO Rho GTPase activating protein 3(SRGAP3)
ENSG00000198363	ASPH	Homo sapiens	aspartate beta-hydroxylase(ASPH)
ENSG00000196924	FLNA	Homo sapiens	filamin A(FLNA)
ENSG00000146426	TIAM2	Homo sapiens	T-cell lymphoma invasion and metastasis 2(TIAM2)
ENSG00000168502	MTCL1	Homo sapiens	microtubule crosslinking factor 1(MTCL1)
ENSG00000043143	JADE2	Homo sapiens	jade family PHD finger 2(JADE2)
ENSG00000100106	TRIOBP	Homo sapiens	TRIO and F-actin binding protein(TRIOBP)
ENSG00000229656	LOC101929475	Homo sapiens	uncharacterized LOC101929475(LOC101929475)
ENSG00000250120	PCDHA10	Homo sapiens	protocadherin alpha 10(PCDHA10)
ENSG00000113946	CLDN16	Homo sapiens	claudin 16(CLDN16)
ENSG00000177879	AP3S1	Homo sapiens	adaptor related protein complex 3 sigma 1 subunit(AP3S1)
ENSG00000160214	RRP1	Homo sapiens	ribosomal RNA processing 1(RRP1)
ENSG00000183853	KIRREL	Homo sapiens	kin of IRRE like (Drosophila)(KIRREL)
ENSG00000132466	ANKRD17	Homo sapiens	ankyrin repeat domain 17(ANKRD17)
ENSG00000187123	LYPD6	Homo sapiens	LY6/PLAUR domain containing 6(LYPD6)
ENSG00000269821	KCNQ1OT1	Homo sapiens	KCNQ1 opposite strand/antisense transcript 1 (non-protein coding)(KCNQ1OT1)
ENSG00000081026	MAGI3	Homo sapiens	membrane associated guanylate kinase, WW and PDZ domain containing 3(MAGI3)
ENSG00000131462	TUBG1	Homo sapiens	tubulin gamma 1(TUBG1)
ENSG00000160207	HSF2BP	Homo sapiens	heat shock transcription factor 2 binding protein(HSF2BP)
ENSG00000124882	EREG	Homo sapiens	epiregulin(EREG)
ENSG00000156017	CARNMT1	Homo sapiens	carnosine N-methyltransferase 1(CARNMT1)
ENSG00000160209	LOC105372824	Homo sapiens	uncharacterized LOC105372824(LOC105372824)
ENSG00000113558	SKP1	Homo sapiens	S-phase kinase associated protein 1(SKP1)
ENSG00000105738	SIPA1L3	Homo sapiens	signal induced proliferation associated 1 like 3(SIPA1L3)
ENSG00000128805	ARHGAP22	Homo sapiens	Rho GTPase activating protein 22(ARHGAP22)
ENSG00000137776	SLTM	Homo sapiens	SAFB like transcription modulator(SLTM)
ENSG00000107864	cpeb3	Homo sapiens	cytoplasmic polyadenylation element binding protein 3(CPEB3)
ENSG00000133026	MYH10	Homo sapiens	myosin heavy chain 10(MYH10)
ENSG00000253438	pcat1	Homo sapiens	prostate cancer associated transcript 1 (non-protein coding)(PCAT1)
ENSG00000005884	ITGA3	Homo sapiens	integrin subunit alpha 3(ITGA3)
ENSG00000092820	EZR	Homo sapiens	ezrin(EZR)
ENSG00000269955	C7orf55-LUC7L2	Homo sapiens	C7orf55-LUC7L2 readthrough(C7orf55-LUC7L2)
ENSG00000183742	MACC1	Homo sapiens	MACC1, MET transcriptional regulator(MACC1)
ENSG00000150687	PRSS23	Homo sapiens	protease, serine 23(PRSS23)
ENSG00000127603	MACF1	Homo sapiens	microtubule-actin crosslinking factor 1(MACF1)
ENSG00000112297	AIM1	Homo sapiens	absent in melanoma 1(AIM1)
ENSG00000158941	CCAR2	Homo sapiens	cell cycle and apoptosis regulator 2(CCAR2)
ENSG00000187239	FNBP1	Homo sapiens	formin binding protein 1(FNBP1)
ENSG00000156026	MCU	Homo sapiens	mitochondrial calcium uniporter(MCU)
ENSG00000012124	MIR5196	Homo sapiens	microRNA 5196(MIR5196)
ENSG00000133131	MORC4	Homo sapiens	MORC family CW-type zinc finger 4(MORC4)
ENSG00000105722	ERF	Homo sapiens	ETS2 repressor factor(ERF)
ENSG00000250072	LOC255187	Homo sapiens	uncharacterized LOC255187(LOC255187)
ENSG00000112984	KIF20A	Homo sapiens	kinesin family member 20A(KIF20A)
ENSG00000149571	KIRREL3	Homo sapiens	kin of IRRE like 3 (Drosophila)(KIRREL3)
ENSG00000197226	TBC1D9B	Homo sapiens	TBC1 domain family member 9B(TBC1D9B)
ENSG00000253582	LOC105375700	Homo sapiens	uncharacterized LOC105375700(LOC105375700)
ENSG00000160602	NEK8	Homo sapiens	NIMA related kinase 8(NEK8)
ENSG00000164741	DLC1	Homo sapiens	DLC1 Rho GTPase activating protein(DLC1)
ENSG00000111142	METAP2	Homo sapiens	methionyl aminopeptidase 2(METAP2)
ENSG00000099331	MYO9B	Homo sapiens	myosin IXB(MYO9B)
ENSG00000175920	DOK7	Homo sapiens	docking protein 7(DOK7)
ENSG00000133816	MICAL2	Homo sapiens	microtubule associated monooxygenase, calponin and LIM domain containing 2(MICAL2)
ENSG00000230590	FTX	Homo sapiens	FTX transcript, XIST regulator (non-protein coding)(FTX)
ENSG00000082805	ERC1	Homo sapiens	ELKS/RAB6-interacting/CAST family member 1(ERC1)
ENSG00000146038	DCDC2	Homo sapiens	doublecortin domain containing 2(DCDC2)
ENSG00000114030	KPNA1	Homo sapiens	karyopherin subunit alpha 1(KPNA1)
ENSG00000123091	RNF11	Homo sapiens	ring finger protein 11(RNF11)
ENSG00000224081	LINC01057	Homo sapiens	long intergenic non-protein coding RNA 1057(LINC01057)
ENSG00000198000	NOL8	Homo sapiens	nucleolar protein 8(NOL8)
ENSG00000160746	ANO10	Homo sapiens	anoctamin 10(ANO10)
ENSG00000170412	GPRC5C	Homo sapiens	G protein-coupled receptor class C group 5 member C(GPRC5C)
ENSG00000130402	ACTN4	Homo sapiens	actinin alpha 4(ACTN4)
ENSG00000092201	SUPT16H	Homo sapiens	SPT16 homolog, facilitates chromatin remodeling subunit(SUPT16H)
ENSG00000138771	SHROOM3	Homo sapiens	shroom family member 3(SHROOM3)
ENSG00000127022	CANX	Homo sapiens	calnexin(CANX)
ENSG00000158106	RHPN1	Homo sapiens	rhophilin Rho GTPase binding protein 1(RHPN1)
ENSG00000205726	ITSN1	Homo sapiens	intersectin 1(ITSN1)
ENSG00000138639	arhgap24	Homo sapiens	Rho GTPase activating protein 24(ARHGAP24)
ENSG00000109606	DHX15	Homo sapiens	DEAH-box helicase 15(DHX15)
ENSG00000134531	EMP1	Homo sapiens	epithelial membrane protein 1(EMP1)
ENSG00000183864	tob2	Homo sapiens	transducer of ERBB2, 2(TOB2)
ENSG00000118898	PPL	Homo sapiens	periplakin(PPL)
ENSG00000058673	ZC3H11A	Homo sapiens	zinc finger CCCH-type containing 11A(ZC3H11A)
ENSG00000236790	LINC00299	Homo sapiens	long intergenic non-protein coding RNA 299(LINC00299)
ENSG00000166579	NDEL1	Homo sapiens	nudE neurodevelopment protein 1 like 1(NDEL1)
ENSG00000106868	SUSD1	Homo sapiens	sushi domain containing 1(SUSD1)
ENSG00000153551	CMTM7	Homo sapiens	CKLF like MARVEL transmembrane domain containing 7(CMTM7)
ENSG00000101255	TRIB3	Homo sapiens	tribbles pseudokinase 3(TRIB3)
ENSG00000104866	PPP1R37	Homo sapiens	protein phosphatase 1 regulatory subunit 37(PPP1R37)
ENSG00000178209	PLEC	Homo sapiens	plectin(PLEC)
ENSG00000137251	TINAG	Homo sapiens	tubulointerstitial nephritis antigen(TINAG)
ENSG00000196365	LONP1	Homo sapiens	lon peptidase 1, mitochondrial(LONP1)
ENSG00000008952	SEC62	Homo sapiens	SEC62 homolog, preprotein translocation factor(SEC62)
ENSG00000187210	GCNT1	Homo sapiens	glucosaminyl (N-acetyl) transferase 1, core 2(GCNT1)
ENSG00000176697	BDNF	Homo sapiens	brain derived neurotrophic factor(BDNF)
