# Supplementary material
Source: MDPI journal article supplement (https://www.mdpi.com/2076-3417/11/1/213)
Supplement: s1 [file s1 › genes_mouse.xlsx]

## Sheet: Sheet1
1	ENSMUSG00000000088
2	ENSMUSG00000000244
3	ENSMUSG00000000305
4	ENSMUSG00000000325
5	ENSMUSG00000000441
6	ENSMUSG00000000631
7	ENSMUSG00000001089
8	ENSMUSG00000001228
9	ENSMUSG00000001415
10	ENSMUSG00000001542
11	ENSMUSG00000001687
12	ENSMUSG00000001930
13	ENSMUSG00000001985
14	ENSMUSG00000001995
15	ENSMUSG00000002031
16	ENSMUSG00000002227
17	ENSMUSG00000002372
18	ENSMUSG00000002489
19	ENSMUSG00000002825
20	ENSMUSG00000002870
21	ENSMUSG00000002983
22	ENSMUSG00000003153
23	ENSMUSG00000003421
24	ENSMUSG00000003452
25	ENSMUSG00000004364
26	ENSMUSG00000004383
27	ENSMUSG00000004637
28	ENSMUSG00000004865
29	ENSMUSG00000004936
30	ENSMUSG00000005371
31	ENSMUSG00000005506
32	ENSMUSG00000005533
33	ENSMUSG00000005566
34	ENSMUSG00000005672
35	ENSMUSG00000006134
36	ENSMUSG00000006304
37	ENSMUSG00000006673
38	ENSMUSG00000006705
39	ENSMUSG00000007379
40	ENSMUSG00000007817
41	ENSMUSG00000007833
42	ENSMUSG00000008028
43	ENSMUSG00000008730
44	ENSMUSG00000009418
45	ENSMUSG00000009828
46	ENSMUSG00000009894
47	ENSMUSG00000010342
48	ENSMUSG00000010538
49	ENSMUSG00000011256
50	ENSMUSG00000013089
51	ENSMUSG00000013415
52	ENSMUSG00000013701
53	ENSMUSG00000014074
54	ENSMUSG00000014245
55	ENSMUSG00000014444
56	ENSMUSG00000014496
57	ENSMUSG00000014932
58	ENSMUSG00000015656
59	ENSMUSG00000015755
60	ENSMUSG00000015766
61	ENSMUSG00000015932
62	ENSMUSG00000016028
63	ENSMUSG00000016477
64	ENSMUSG00000017417
65	ENSMUSG00000017550
66	ENSMUSG00000017631
67	ENSMUSG00000018076
68	ENSMUSG00000018334
69	ENSMUSG00000018340
70	ENSMUSG00000018378
71	ENSMUSG00000018411
72	ENSMUSG00000018412
73	ENSMUSG00000018501
74	ENSMUSG00000018593
75	ENSMUSG00000018604
76	ENSMUSG00000018651
77	ENSMUSG00000018678
78	ENSMUSG00000018849
79	ENSMUSG00000018974
80	ENSMUSG00000019188
81	ENSMUSG00000019841
82	ENSMUSG00000019889
83	ENSMUSG00000019907
84	ENSMUSG00000019970
85	ENSMUSG00000020015
86	ENSMUSG00000020042
87	ENSMUSG00000020182
88	ENSMUSG00000020227
89	ENSMUSG00000020333
90	ENSMUSG00000020400
91	ENSMUSG00000020422
92	ENSMUSG00000020451
93	ENSMUSG00000020453
94	ENSMUSG00000020458
95	ENSMUSG00000020530
96	ENSMUSG00000020634
97	ENSMUSG00000020661
98	ENSMUSG00000020717
99	ENSMUSG00000020745
100	ENSMUSG00000020954
101	ENSMUSG00000021036
102	ENSMUSG00000021096
103	ENSMUSG00000021133
104	ENSMUSG00000021222
105	ENSMUSG00000021255
106	ENSMUSG00000021270
107	ENSMUSG00000021464
108	ENSMUSG00000021686
109	ENSMUSG00000021699
110	ENSMUSG00000021745
111	ENSMUSG00000021767
112	ENSMUSG00000021796
113	ENSMUSG00000021895
114	ENSMUSG00000022010
115	ENSMUSG00000022012
116	ENSMUSG00000022141
117	ENSMUSG00000022246
118	ENSMUSG00000022285
119	ENSMUSG00000022312
120	ENSMUSG00000022387
121	ENSMUSG00000022419
122	ENSMUSG00000022443
123	ENSMUSG00000022500
124	ENSMUSG00000022521
125	ENSMUSG00000022652
126	ENSMUSG00000022812
127	ENSMUSG00000022861
128	ENSMUSG00000022951
129	ENSMUSG00000022995
130	ENSMUSG00000023017
131	ENSMUSG00000023027
132	ENSMUSG00000023036
133	ENSMUSG00000023467
134	ENSMUSG00000023505
135	ENSMUSG00000023809
136	ENSMUSG00000023845
137	ENSMUSG00000023915
138	ENSMUSG00000023932
139	ENSMUSG00000023935
140	ENSMUSG00000023944
141	ENSMUSG00000023984
142	ENSMUSG00000024002
143	ENSMUSG00000024070
144	ENSMUSG00000024073
145	ENSMUSG00000024213
146	ENSMUSG00000024240
147	ENSMUSG00000024241
148	ENSMUSG00000024242
149	ENSMUSG00000024283
150	ENSMUSG00000024376
151	ENSMUSG00000024384
152	ENSMUSG00000024498
153	ENSMUSG00000024539
154	ENSMUSG00000024563
155	ENSMUSG00000024642
156	ENSMUSG00000024780
157	ENSMUSG00000024867
158	ENSMUSG00000024983
159	ENSMUSG00000024991
160	ENSMUSG00000025006
161	ENSMUSG00000025019
162	ENSMUSG00000025025
163	ENSMUSG00000025027
164	ENSMUSG00000025085
165	ENSMUSG00000025147
166	ENSMUSG00000025171
167	ENSMUSG00000025195
168	ENSMUSG00000025234
169	ENSMUSG00000025246
170	ENSMUSG00000025314
171	ENSMUSG00000025340
172	ENSMUSG00000025420
173	ENSMUSG00000025423
174	ENSMUSG00000025537
175	ENSMUSG00000025726
176	ENSMUSG00000025747
177	ENSMUSG00000025856
178	ENSMUSG00000025903
179	ENSMUSG00000025950
180	ENSMUSG00000025969
181	ENSMUSG00000025980
182	ENSMUSG00000026074
183	ENSMUSG00000026116
184	ENSMUSG00000026193
185	ENSMUSG00000026219
186	ENSMUSG00000026235
187	ENSMUSG00000026356
188	ENSMUSG00000026463
189	ENSMUSG00000026479
190	ENSMUSG00000026565
191	ENSMUSG00000026566
192	ENSMUSG00000026604
193	ENSMUSG00000026773
194	ENSMUSG00000026796
195	ENSMUSG00000026883
196	ENSMUSG00000026960
197	ENSMUSG00000026987
198	ENSMUSG00000026991
199	ENSMUSG00000027010
200	ENSMUSG00000027109
201	ENSMUSG00000027452
202	ENSMUSG00000027547
203	ENSMUSG00000027593
204	ENSMUSG00000027596
205	ENSMUSG00000027624
206	ENSMUSG00000027630
207	ENSMUSG00000027646
208	ENSMUSG00000027678
209	ENSMUSG00000027778
210	ENSMUSG00000027940
211	ENSMUSG00000027947
212	ENSMUSG00000028019
213	ENSMUSG00000028152
214	ENSMUSG00000028165
215	ENSMUSG00000028177
216	ENSMUSG00000028274
217	ENSMUSG00000028282
218	ENSMUSG00000028333
219	ENSMUSG00000028397
220	ENSMUSG00000028412
221	ENSMUSG00000028483
222	ENSMUSG00000028487
223	ENSMUSG00000028488
224	ENSMUSG00000028649
225	ENSMUSG00000028677
226	ENSMUSG00000028693
227	ENSMUSG00000028745
228	ENSMUSG00000028801
229	ENSMUSG00000028944
230	ENSMUSG00000029120
231	ENSMUSG00000029178
232	ENSMUSG00000029202
233	ENSMUSG00000029203
234	ENSMUSG00000029207
235	ENSMUSG00000029359
236	ENSMUSG00000029381
237	ENSMUSG00000029478
238	ENSMUSG00000029512
239	ENSMUSG00000029550
240	ENSMUSG00000029673
241	ENSMUSG00000029686
242	ENSMUSG00000029763
243	ENSMUSG00000029772
244	ENSMUSG00000029916
245	ENSMUSG00000030064
246	ENSMUSG00000030088
247	ENSMUSG00000030102
248	ENSMUSG00000030117
249	ENSMUSG00000030257
250	ENSMUSG00000030268
251	ENSMUSG00000030276
252	ENSMUSG00000030283
253	ENSMUSG00000030313
254	ENSMUSG00000030352
255	ENSMUSG00000030494
256	ENSMUSG00000030518
257	ENSMUSG00000030536
258	ENSMUSG00000030553
259	ENSMUSG00000030583
260	ENSMUSG00000030602
261	ENSMUSG00000030619
262	ENSMUSG00000030649
263	ENSMUSG00000030766
264	ENSMUSG00000030849
265	ENSMUSG00000030852
266	ENSMUSG00000030956
267	ENSMUSG00000030970
268	ENSMUSG00000030979
269	ENSMUSG00000031024
270	ENSMUSG00000031216
271	ENSMUSG00000031489
272	ENSMUSG00000031533
273	ENSMUSG00000031540
274	ENSMUSG00000031561
275	ENSMUSG00000031592
276	ENSMUSG00000031665
277	ENSMUSG00000031701
278	ENSMUSG00000031714
279	ENSMUSG00000031731
280	ENSMUSG00000031758
281	ENSMUSG00000031826
282	ENSMUSG00000031925
283	ENSMUSG00000031954
284	ENSMUSG00000032015
285	ENSMUSG00000032017
286	ENSMUSG00000032036
287	ENSMUSG00000032113
288	ENSMUSG00000032202
289	ENSMUSG00000032212
290	ENSMUSG00000032220
291	ENSMUSG00000032249
292	ENSMUSG00000032348
293	ENSMUSG00000032402
294	ENSMUSG00000032485
295	ENSMUSG00000032518
296	ENSMUSG00000032530
297	ENSMUSG00000032548
298	ENSMUSG00000032586
299	ENSMUSG00000032826
300	ENSMUSG00000032827
301	ENSMUSG00000032985
302	ENSMUSG00000032998
303	ENSMUSG00000033499
304	ENSMUSG00000033502
305	ENSMUSG00000033581
306	ENSMUSG00000033713
307	ENSMUSG00000033983
308	ENSMUSG00000034135
309	ENSMUSG00000034154
310	ENSMUSG00000034165
311	ENSMUSG00000034187
312	ENSMUSG00000034295
313	ENSMUSG00000034312
314	ENSMUSG00000034518
315	ENSMUSG00000034563
316	ENSMUSG00000034714
317	ENSMUSG00000034994
318	ENSMUSG00000034998
319	ENSMUSG00000035067
320	ENSMUSG00000035133
321	ENSMUSG00000035168
322	ENSMUSG00000035203
323	ENSMUSG00000035299
324	ENSMUSG00000035407
325	ENSMUSG00000035569
326	ENSMUSG00000035765
327	ENSMUSG00000035778
328	ENSMUSG00000035873
329	ENSMUSG00000035933
330	ENSMUSG00000035934
331	ENSMUSG00000036030
332	ENSMUSG00000036053
333	ENSMUSG00000036180
334	ENSMUSG00000036206
335	ENSMUSG00000036241
336	ENSMUSG00000036452
337	ENSMUSG00000036568
338	ENSMUSG00000036585
339	ENSMUSG00000036617
340	ENSMUSG00000036698
341	ENSMUSG00000036779
342	ENSMUSG00000036822
343	ENSMUSG00000037058
344	ENSMUSG00000037217
345	ENSMUSG00000037369
346	ENSMUSG00000037375
347	ENSMUSG00000037386
348	ENSMUSG00000037492
349	ENSMUSG00000037622
350	ENSMUSG00000037742
351	ENSMUSG00000037860
352	ENSMUSG00000037876
353	ENSMUSG00000037921
354	ENSMUSG00000038056
355	ENSMUSG00000038058
356	ENSMUSG00000038143
357	ENSMUSG00000038172
358	ENSMUSG00000038311
359	ENSMUSG00000038366
360	ENSMUSG00000038418
361	ENSMUSG00000038453
362	ENSMUSG00000038456
363	ENSMUSG00000038482
364	ENSMUSG00000038518
365	ENSMUSG00000038533
366	ENSMUSG00000038587
367	ENSMUSG00000038651
368	ENSMUSG00000038679
369	ENSMUSG00000038697
370	ENSMUSG00000038729
371	ENSMUSG00000038763
372	ENSMUSG00000038770
373	ENSMUSG00000038780
374	ENSMUSG00000038807
375	ENSMUSG00000038816
376	ENSMUSG00000038866
377	ENSMUSG00000039068
378	ENSMUSG00000039087
379	ENSMUSG00000039191
380	ENSMUSG00000039218
381	ENSMUSG00000039233
382	ENSMUSG00000039262
383	ENSMUSG00000039382
384	ENSMUSG00000039410
385	ENSMUSG00000039458
386	ENSMUSG00000039542
387	ENSMUSG00000039671
388	ENSMUSG00000039697
389	ENSMUSG00000039835
390	ENSMUSG00000039842
391	ENSMUSG00000039844
392	ENSMUSG00000039959
393	ENSMUSG00000040111
394	ENSMUSG00000040128
395	ENSMUSG00000040209
396	ENSMUSG00000040282
397	ENSMUSG00000040451
398	ENSMUSG00000040548
399	ENSMUSG00000040624
400	ENSMUSG00000040640
401	ENSMUSG00000040669
402	ENSMUSG00000040717
403	ENSMUSG00000040761
404	ENSMUSG00000040818
405	ENSMUSG00000040943
406	ENSMUSG00000041220
407	ENSMUSG00000041297
408	ENSMUSG00000041308
409	ENSMUSG00000041408
410	ENSMUSG00000041440
411	ENSMUSG00000041530
412	ENSMUSG00000041540
413	ENSMUSG00000041548
414	ENSMUSG00000041624
415	ENSMUSG00000041654
416	ENSMUSG00000041670
417	ENSMUSG00000041992
418	ENSMUSG00000041997
419	ENSMUSG00000042010
420	ENSMUSG00000042035
421	ENSMUSG00000042308
422	ENSMUSG00000042348
423	ENSMUSG00000042390
424	ENSMUSG00000042401
425	ENSMUSG00000042406
426	ENSMUSG00000042410
427	ENSMUSG00000042460
428	ENSMUSG00000042507
429	ENSMUSG00000042605
430	ENSMUSG00000042751
431	ENSMUSG00000043301
432	ENSMUSG00000043323
433	ENSMUSG00000043535
434	ENSMUSG00000043857
435	ENSMUSG00000044017
436	ENSMUSG00000044033
437	ENSMUSG00000044250
438	ENSMUSG00000044499
439	ENSMUSG00000044646
440	ENSMUSG00000044707
441	ENSMUSG00000044813
442	ENSMUSG00000044835
443	ENSMUSG00000044948
444	ENSMUSG00000044950
445	ENSMUSG00000045098
446	ENSMUSG00000045659
447	ENSMUSG00000045671
448	ENSMUSG00000045822
449	ENSMUSG00000045867
450	ENSMUSG00000046201
451	ENSMUSG00000046415
452	ENSMUSG00000046873
453	ENSMUSG00000047126
454	ENSMUSG00000047141
455	ENSMUSG00000047407
456	ENSMUSG00000047434
457	ENSMUSG00000047821
458	ENSMUSG00000047907
459	ENSMUSG00000048078
460	ENSMUSG00000048240
461	ENSMUSG00000048445
462	ENSMUSG00000048701
463	ENSMUSG00000048874
464	ENSMUSG00000049295
465	ENSMUSG00000049313
466	ENSMUSG00000049807
467	ENSMUSG00000049971
468	ENSMUSG00000050122
469	ENSMUSG00000050199
470	ENSMUSG00000050310
471	ENSMUSG00000050737
472	ENSMUSG00000050917
473	ENSMUSG00000050953
474	ENSMUSG00000051339
475	ENSMUSG00000051355
476	ENSMUSG00000051391
477	ENSMUSG00000051650
478	ENSMUSG00000051747
479	ENSMUSG00000052336
480	ENSMUSG00000052353
481	ENSMUSG00000052363
482	ENSMUSG00000052387
483	ENSMUSG00000052698
484	ENSMUSG00000052707
485	ENSMUSG00000052726
486	ENSMUSG00000052833
487	ENSMUSG00000052928
488	ENSMUSG00000052942
489	ENSMUSG00000053062
490	ENSMUSG00000053198
491	ENSMUSG00000053436
492	ENSMUSG00000053617
493	ENSMUSG00000053754
494	ENSMUSG00000054008
495	ENSMUSG00000054263
496	ENSMUSG00000054385
497	ENSMUSG00000054387
498	ENSMUSG00000054648
499	ENSMUSG00000054770
500	ENSMUSG00000054808
501	ENSMUSG00000055027
502	ENSMUSG00000055067
503	ENSMUSG00000055204
504	ENSMUSG00000055254
505	ENSMUSG00000055322
506	ENSMUSG00000055373
507	ENSMUSG00000055436
508	ENSMUSG00000055799
509	ENSMUSG00000056204
510	ENSMUSG00000056458
511	ENSMUSG00000056515
512	ENSMUSG00000056899
513	ENSMUSG00000057098
514	ENSMUSG00000057738
515	ENSMUSG00000058056
516	ENSMUSG00000058186
517	ENSMUSG00000058230
518	ENSMUSG00000058440
519	ENSMUSG00000058704
520	ENSMUSG00000059248
521	ENSMUSG00000059288
522	ENSMUSG00000059439
523	ENSMUSG00000059586
524	ENSMUSG00000059659
525	ENSMUSG00000060206
526	ENSMUSG00000060402
527	ENSMUSG00000060475
528	ENSMUSG00000060477
529	ENSMUSG00000060519
530	ENSMUSG00000061130
531	ENSMUSG00000061286
532	ENSMUSG00000061576
533	ENSMUSG00000061665
534	ENSMUSG00000061689
535	ENSMUSG00000061731
536	ENSMUSG00000061950
537	ENSMUSG00000062078
538	ENSMUSG00000063019
539	ENSMUSG00000063410
540	ENSMUSG00000063524
541	ENSMUSG00000064043
542	ENSMUSG00000064105
543	ENSMUSG00000064194
544	ENSMUSG00000064337
545	ENSMUSG00000064339
546	ENSMUSG00000064351
547	ENSMUSG00000065037
548	ENSMUSG00000065954
549	ENSMUSG00000066892
550	ENSMUSG00000068923
551	ENSMUSG00000069089
552	ENSMUSG00000069495
553	ENSMUSG00000069601
554	ENSMUSG00000069729
555	ENSMUSG00000069769
556	ENSMUSG00000069833
557	ENSMUSG00000070047
558	ENSMUSG00000070544
559	ENSMUSG00000070733
560	ENSMUSG00000071226
561	ENSMUSG00000071856
562	ENSMUSG00000072294
563	ENSMUSG00000072834
564	ENSMUSG00000073633
565	ENSMUSG00000073676
566	ENSMUSG00000073678
567	ENSMUSG00000074398
568	ENSMUSG00000074634
569	ENSMUSG00000074698
570	ENSMUSG00000074862
571	ENSMUSG00000074867
572	ENSMUSG00000075122
573	ENSMUSG00000075415
574	ENSMUSG00000076258
575	ENSMUSG00000078671
576	ENSMUSG00000078700
577	ENSMUSG00000078765
578	ENSMUSG00000078868
579	ENSMUSG00000079259
580	ENSMUSG00000083161
581	ENSMUSG00000084826
582	ENSMUSG00000084950
583	ENSMUSG00000085396
584	ENSMUSG00000085634
585	ENSMUSG00000086003
586	ENSMUSG00000086184
587	ENSMUSG00000086429
588	ENSMUSG00000087455
589	ENSMUSG00000087516
590	ENSMUSG00000087614
591	ENSMUSG00000089865
592	ENSMUSG00000089945
593	ENSMUSG00000090053
594	ENSMUSG00000090086
595	ENSMUSG00000090118
596	ENSMUSG00000090266
597	ENSMUSG00000092048
598	ENSMUSG00000092329
599	ENSMUSG00000092341
600	ENSMUSG00000093456
601	ENSMUSG00000093485
602	ENSMUSG00000094443
603	ENSMUSG00000096768
604	ENSMUSG00000097039
605	ENSMUSG00000097048
606	ENSMUSG00000097120
607	ENSMUSG00000097125
608	ENSMUSG00000097276
609	ENSMUSG00000097584
610	ENSMUSG00000097589
611	ENSMUSG00000097622
612	ENSMUSG00000097640
613	ENSMUSG00000097921
614	ENSMUSG00000097971
615	ENSMUSG00000098008
616	ENSMUSG00000099370
617	ENSMUSG00000099553
618	ENSMUSG00000099988
619	ENSMUSG00000100583
620	ENSMUSG00000100865
621	ENSMUSG00000102222
622	ENSMUSG00000102428
623	ENSMUSG00000102440
624	ENSMUSG00000102543
625	ENSMUSG00000102742
626	ENSMUSG00000102748
627	ENSMUSG00000102805
628	ENSMUSG00000102836
629	ENSMUSG00000102918
630	ENSMUSG00000103037
631	ENSMUSG00000103081
632	ENSMUSG00000103088
633	ENSMUSG00000103108
634	ENSMUSG00000103125
635	ENSMUSG00000103144
636	ENSMUSG00000103332
637	ENSMUSG00000103458
638	ENSMUSG00000103472
639	ENSMUSG00000103567
640	ENSMUSG00000103585
641	ENSMUSG00000103677
642	ENSMUSG00000103749
643	ENSMUSG00000103793
644	ENSMUSG00000103897
645	ENSMUSG00000104063
646	ENSMUSG00000104217
647	ENSMUSG00000104346
648	ENSMUSG00000104535
649	ENSMUSG00000104574
650	ENSMUSG00000105265
651	ENSMUSG00000107714
652	ENSMUSG00000108111
653	ENSMUSG00000108905
654	ENSMUSG00000109314
655	ENSMUSG00000109336
656	ENSMUSG00000109674
657	ENSMUSG00000110444
658	ENSMUSG00000110884
659	ENSMUSG00000111658
660	ENSMUSG00000111673
661	ENSMUSG00000112437
662	ENSMUSG00000112743
663	ENSMUSG00000114036
664	ENSMUSG00000114053
665	ENSMUSG00000114439
666	ENSMUSG00000116016
667	ENSMUSG00000116930
668	ENSMUSG00000116933

## Sheet: Sheet2
From	To	Species	Gene Name
ENSMUSG00000078700	D030028A08Rik	Mus musculus	RIKEN cDNA D030028A08 gene(D030028A08Rik)
ENSMUSG00000038518	JARID2	Mus musculus	jumonji, AT rich interactive domain 2(Jarid2)
ENSMUSG00000066892	FBXL12	Mus musculus	F-box and leucine-rich repeat protein 12(Fbxl12)
ENSMUSG00000030649	ANAPC15	Mus musculus	anaphase prompoting complex C subunit 15(Anapc15)
ENSMUSG00000103144	PCDHGA1	Mus musculus	protocadherin gamma subfamily A, 1(Pcdhga1)
ENSMUSG00000022951	RCAN1	Mus musculus	regulator of calcineurin 1(Rcan1)
ENSMUSG00000086429	Gt(ROSA)26Sor	Mus musculus	gene trap ROSA 26, Philippe Soriano(Gt(ROSA)26Sor)
ENSMUSG00000018501	NCOR1	Mus musculus	nuclear receptor co-repressor 1(Ncor1)
ENSMUSG00000050199	LGR4	Mus musculus	leucine-rich repeat-containing G protein-coupled receptor 4(Lgr4)
ENSMUSG00000038418	EGR1	Mus musculus	early growth response 1(Egr1)
ENSMUSG00000038697	TAF5L	Mus musculus	TATA-box binding protein associated factor 5 like(Taf5l)
ENSMUSG00000052707	TNRC6A	Mus musculus	trinucleotide repeat containing 6a(Tnrc6a)
ENSMUSG00000026193	FN1	Mus musculus	fibronectin 1(Fn1)
ENSMUSG00000042308	SETD1A	Mus musculus	SET domain containing 1A(Setd1a)
ENSMUSG00000029686	CUL1	Mus musculus	cullin 1(Cul1)
ENSMUSG00000042035	igsf3	Mus musculus	immunoglobulin superfamily, member 3(Igsf3)
ENSMUSG00000027452	ACSS1	Mus musculus	acyl-CoA synthetase short-chain family member 1(Acss1)
ENSMUSG00000019970	SGK1	Mus musculus	serum/glucocorticoid regulated kinase 1(Sgk1)
ENSMUSG00000008028	1700008O03Rik	Mus musculus	RIKEN cDNA 1700008O03 gene(1700008O03Rik)
ENSMUSG00000036698	AGO2	Mus musculus	argonaute RISC catalytic subunit 2(Ago2)
ENSMUSG00000075415	FNBP1	Mus musculus	formin binding protein 1(Fnbp1)
ENSMUSG00000092329	GALNT2	Mus musculus	UDP-N-acetyl-alpha-D-galactosamine:polypeptide N-acetylgalactosaminyltransferase 2(Galnt2)
ENSMUSG00000030536	iqgap1	Mus musculus	IQ motif containing GTPase activating protein 1(Iqgap1)
ENSMUSG00000013089	ETV5	Mus musculus	ets variant 5(Etv5)
ENSMUSG00000035299	MID1	Mus musculus	midline 1(Mid1)
ENSMUSG00000039959	HIP1	Mus musculus	huntingtin interacting protein 1(Hip1)
ENSMUSG00000027646	SRC	Mus musculus	Rous sarcoma oncogene(Src)
ENSMUSG00000052833	SAE1	Mus musculus	SUMO1 activating enzyme subunit 1(Sae1)
ENSMUSG00000103472	PCDHGA7	Mus musculus	protocadherin gamma subfamily A, 7(Pcdhga7)
ENSMUSG00000103332	PCDHGA2	Mus musculus	protocadherin gamma subfamily A, 2(Pcdhga2)
ENSMUSG00000047434	XXYLT1	Mus musculus	xyloside xylosyltransferase 1(Xxylt1)
ENSMUSG00000040818	DENND6A	Mus musculus	DENN/MADD domain containing 6A(Dennd6a)
ENSMUSG00000056204	PGPEP1	Mus musculus	pyroglutamyl-peptidase I(Pgpep1)
ENSMUSG00000038816	CTNNAL1	Mus musculus	catenin (cadherin associated protein), alpha-like 1(Ctnnal1)
ENSMUSG00000035168	TANC1	Mus musculus	tetratricopeptide repeat, ankyrin repeat and coiled-coil containing 1(Tanc1)
ENSMUSG00000024242	MAP4K3	Mus musculus	mitogen-activated protein kinase kinase kinase kinase 3(Map4k3)
ENSMUSG00000024384	IWS1	Mus musculus	IWS1 homolog (S. cerevisiae)(Iws1)
ENSMUSG00000039382	WDR45	Mus musculus	WD repeat domain 45(Wdr45)
ENSMUSG00000029763	EXOC4	Mus musculus	exocyst complex component 4(Exoc4)
ENSMUSG00000038679	TRPS1	Mus musculus	trichorhinophalangeal syndrome I (human)(Trps1)
ENSMUSG00000035934	PKNOX2	Mus musculus	Pbx/knotted 1 homeobox 2(Pknox2)
ENSMUSG00000035933	COG5	Mus musculus	component of oligomeric golgi complex 5(Cog5)
ENSMUSG00000024241	SOS1	Mus musculus	son of sevenless homolog 1 (Drosophila)(Sos1)
ENSMUSG00000027630	TBL1XR1	Mus musculus	transducin (beta)-like 1X-linked receptor 1(Tbl1xr1)
ENSMUSG00000024240	EPC1	Mus musculus	enhancer of polycomb homolog 1 (Drosophila)(Epc1)
ENSMUSG00000053062	JAM2	Mus musculus	junction adhesion molecule 2(Jam2)
ENSMUSG00000000631	MYO18A	Mus musculus	myosin XVIIIA(Myo18a)
ENSMUSG00000056458	MOK	Mus musculus	MOK protein kinase(Mok)
ENSMUSG00000092048	Vmn2r85	Mus musculus	vomeronasal 2, receptor 85(Vmn2r85)
ENSMUSG00000022387	BRD1	Mus musculus	bromodomain containing 1(Brd1)
ENSMUSG00000052726	KCNT2	Mus musculus	potassium channel, subfamily T, member 2(Kcnt2)
ENSMUSG00000041440	GK5	Mus musculus	glycerol kinase 5 (putative)(Gk5)
ENSMUSG00000041308	SNTB2	Mus musculus	syntrophin, basic 2(Sntb2)
ENSMUSG00000060519	TOR3A	Mus musculus	torsin family 3, member A(Tor3a)
ENSMUSG00000026074	map4k4	Mus musculus	mitogen-activated protein kinase kinase kinase kinase 4(Map4k4)
ENSMUSG00000042010	ACACB	Mus musculus	acetyl-Coenzyme A carboxylase beta(Acacb)
ENSMUSG00000038807	RAP1GAP2	Mus musculus	RAP1 GTPase activating protein 2(Rap1gap2)
ENSMUSG00000038533	CBFA2T2	Mus musculus	core-binding factor, runt domain, alpha subunit 2, translocated to, 2 (human)(Cbfa2t2)
ENSMUSG00000033499	LARP4B	Mus musculus	La ribonucleoprotein domain family, member 4B(Larp4b)
ENSMUSG00000022285	YWHAZ	Mus musculus	tyrosine 3-monooxygenase/tryptophan 5-monooxygenase activation protein, zeta polypeptide(Ywhaz)
ENSMUSG00000003153	SLC2A3	Mus musculus	solute carrier family 2 (facilitated glucose transporter), member 3(Slc2a3)
ENSMUSG00000006673	QRICH1	Mus musculus	glutamine-rich 1(Qrich1)
ENSMUSG00000019889	PTPRK	Mus musculus	protein tyrosine phosphatase, receptor type, K(Ptprk)
ENSMUSG00000040451	SGMS1	Mus musculus	sphingomyelin synthase 1(Sgms1)
ENSMUSG00000085396	Firre	Mus musculus	functional intergenic repeating RNA element(Firre)
ENSMUSG00000025234	ARIH1	Mus musculus	ariadne RBR E3 ubiquitin protein ligase 1(Arih1)
ENSMUSG00000027624	EPB41L1	Mus musculus	erythrocyte membrane protein band 4.1 like 1(Epb41l1)
ENSMUSG00000042410	AGPS	Mus musculus	alkylglycerone phosphate synthase(Agps)
ENSMUSG00000029772	AHCYL2	Mus musculus	S-adenosylhomocysteine hydrolase-like 2(Ahcyl2)
ENSMUSG00000024376	EPB41L4A	Mus musculus	erythrocyte membrane protein band 4.1 like 4a(Epb41l4a)
ENSMUSG00000032518	RPSA	Mus musculus	ribosomal protein SA(Rpsa)
ENSMUSG00000030518	FAM189A1	Mus musculus	family with sequence similarity 189, member A1(Fam189a1)
ENSMUSG00000039191	RBPJ	Mus musculus	recombination signal binding protein for immunoglobulin kappa J region(Rbpj)
ENSMUSG00000007833	ALDH16A1	Mus musculus	aldehyde dehydrogenase 16 family, member A1(Aldh16a1)
ENSMUSG00000109336	SAMD4B	Mus musculus	sterile alpha motif domain containing 4B(Samd4b)
ENSMUSG00000039087	RREB1	Mus musculus	ras responsive element binding protein 1(Rreb1)
ENSMUSG00000039697	NCOA7	Mus musculus	nuclear receptor coactivator 7(Ncoa7)
ENSMUSG00000054263	LIFR	Mus musculus	leukemia inhibitory factor receptor(Lifr)
ENSMUSG00000103458	Gm37013	Mus musculus	predicted gene, 37013(Gm37013)
ENSMUSG00000037921	DDX60	Mus musculus	DEAD (Asp-Glu-Ala-Asp) box polypeptide 60(Ddx60)
ENSMUSG00000053754	CHD8	Mus musculus	chromodomain helicase DNA binding protein 8(Chd8)
ENSMUSG00000020227	IRAK3	Mus musculus	interleukin-1 receptor-associated kinase 3(Irak3)
ENSMUSG00000025147	MOB2	Mus musculus	MOB kinase activator 2(Mob2)
ENSMUSG00000025246	TBL1X	Mus musculus	transducin (beta)-like 1 X-linked(Tbl1x)
ENSMUSG00000038866	ZCCHC2	Mus musculus	zinc finger, CCHC domain containing 2(Zcchc2)
ENSMUSG00000072294	KLF12	Mus musculus	Kruppel-like factor 12(Klf12)
ENSMUSG00000041220	ELOVL6	Mus musculus	ELOVL family member 6, elongation of long chain fatty acids (yeast)(Elovl6)
ENSMUSG00000052942	GLIS3	Mus musculus	GLIS family zinc finger 3(Glis3)
ENSMUSG00000028801	stpg1	Mus musculus	sperm tail PG rich repeat containing 1(Stpg1)
ENSMUSG00000025340	RABGEF1	Mus musculus	RAB guanine nucleotide exchange factor (GEF) 1(Rabgef1)
ENSMUSG00000028019	PDGFC	Mus musculus	platelet-derived growth factor, C polypeptide(Pdgfc)
ENSMUSG00000038453	SRCIN1	Mus musculus	SRC kinase signaling inhibitor 1(Srcin1)
ENSMUSG00000018604	TBX3	Mus musculus	T-box 3(Tbx3)
ENSMUSG00000032402	SMAD3	Mus musculus	SMAD family member 3(Smad3)
ENSMUSG00000030583	SIPA1L3	Mus musculus	signal-induced proliferation-associated 1 like 3(Sipa1l3)
ENSMUSG00000042401	CRTAC1	Mus musculus	cartilage acidic protein 1(Crtac1)
ENSMUSG00000097276	4930525G20Rik	Mus musculus	RIKEN cDNA 4930525G20 gene(4930525G20Rik)
ENSMUSG00000025856	PDGFA	Mus musculus	platelet derived growth factor, alpha(Pdgfa)
ENSMUSG00000028944	PRKAG2	Mus musculus	protein kinase, AMP-activated, gamma 2 non-catalytic subunit(Prkag2)
ENSMUSG00000042406	ATF4	Mus musculus	activating transcription factor 4(Atf4)
ENSMUSG00000038456	DENND2A	Mus musculus	DENN/MADD domain containing 2A(Dennd2a)
ENSMUSG00000007817	ZMIZ1	Mus musculus	zinc finger, MIZ-type containing 1(Zmiz1)
ENSMUSG00000054385	Ceacam2	Mus musculus	carcinoembryonic antigen-related cell adhesion molecule 2(Ceacam2)
ENSMUSG00000055322	TNS1	Mus musculus	tensin 1(Tns1)
ENSMUSG00000054387	MDM4	Mus musculus	transformed mouse 3T3 cell double minute 4(Mdm4)
ENSMUSG00000040282	BC052040	Mus musculus	cDNA sequence BC052040(BC052040)
ENSMUSG00000072834	Gm12298	Mus musculus	predicted gene 12298(Gm12298)
ENSMUSG00000027547	SALL4	Mus musculus	sal-like 4 (Drosophila)(Sall4)
ENSMUSG00000022010	TSC22D1	Mus musculus	TSC22 domain family, member 1(Tsc22d1)
ENSMUSG00000038763	ALPK3	Mus musculus	alpha-kinase 3(Alpk3)
ENSMUSG00000022012	enox1	Mus musculus	ecto-NOX disulfide-thiol exchanger 1(Enox1)
ENSMUSG00000102918	PCDHGC3	Mus musculus	protocadherin gamma subfamily C, 3(Pcdhgc3)
ENSMUSG00000060402	CHST8	Mus musculus	carbohydrate (N-acetylgalactosamine 4-0) sulfotransferase 8(Chst8)
ENSMUSG00000039068	ZZZ3	Mus musculus	zinc finger, ZZ domain containing 3(Zzz3)
ENSMUSG00000048078	TENM4	Mus musculus	teneurin transmembrane protein 4(Tenm4)
ENSMUSG00000024498	TCERG1	Mus musculus	transcription elongation regulator 1 (CA150)(Tcerg1)
ENSMUSG00000025747	TYMS	Mus musculus	thymidylate synthase(Tyms)
ENSMUSG00000029550	SPPL3	Mus musculus	signal peptide peptidase 3(Sppl3)
ENSMUSG00000059288	CDYL	Mus musculus	chromodomain protein, Y chromosome-like(Cdyl)
ENSMUSG00000020015	CDK17	Mus musculus	cyclin-dependent kinase 17(Cdk17)
ENSMUSG00000041530	Ago1	Mus musculus	argonaute RISC catalytic subunit 1(Ago1)
ENSMUSG00000038770	KPNA7	Mus musculus	karyopherin alpha 7 (importin alpha 8)(Kpna7)
ENSMUSG00000028412	SLC44A1	Mus musculus	solute carrier family 44, member 1(Slc44a1)
ENSMUSG00000047407	TGIF1	Mus musculus	TGFB-induced factor homeobox 1(Tgif1)
ENSMUSG00000022141	NIPBL	Mus musculus	Nipped-B homolog (Drosophila)(Nipbl)
ENSMUSG00000037386	RIMS2	Mus musculus	regulating synaptic membrane exocytosis 2(Rims2)
ENSMUSG00000027678	NCOA3	Mus musculus	nuclear receptor coactivator 3(Ncoa3)
ENSMUSG00000040943	TET2	Mus musculus	tet methylcytosine dioxygenase 2(Tet2)
ENSMUSG00000024283	WAC	Mus musculus	WW domain containing adaptor with coiled-coil(Wac)
ENSMUSG00000041548	HSPB8	Mus musculus	heat shock protein 8(Hspb8)
ENSMUSG00000041408	WAPL	Mus musculus	WAPL cohesin release factor(Wapl)
ENSMUSG00000025537	PHKG1	Mus musculus	phosphorylase kinase gamma 1(Phkg1)
ENSMUSG00000052387	TRPM3	Mus musculus	transient receptor potential cation channel, subfamily M, member 3(Trpm3)
ENSMUSG00000006134	CRKL	Mus musculus	v-crk avian sarcoma virus CT10 oncogene homolog-like(Crkl)
ENSMUSG00000042605	ATXN2	Mus musculus	ataxin 2(Atxn2)
ENSMUSG00000030766	ARHGAP17	Mus musculus	Rho GTPase activating protein 17(Arhgap17)
ENSMUSG00000022246	RAI14	Mus musculus	retinoic acid induced 14(Rai14)
ENSMUSG00000069495	EPC2	Mus musculus	enhancer of polycomb homolog 2 (Drosophila)(Epc2)
ENSMUSG00000019188	H13	Mus musculus	histocompatibility 13(H13)
ENSMUSG00000035873	PAWR	Mus musculus	PRKC, apoptosis, WT1, regulator(Pawr)
ENSMUSG00000048874	PHF3	Mus musculus	PHD finger protein 3(Phf3)
ENSMUSG00000013415	IGF2BP1	Mus musculus	insulin-like growth factor 2 mRNA binding protein 1(Igf2bp1)
ENSMUSG00000065037	rn7sk	Mus musculus	RNA, 7SK, nuclear(Rn7sk)
ENSMUSG00000038311	2410017I17Rik	Mus musculus	RIKEN cDNA 2410017I17 gene(2410017I17Rik)
ENSMUSG00000041540	SOX5	Mus musculus	SRY (sex determining region Y)-box 5(Sox5)
ENSMUSG00000018076	MED13L	Mus musculus	mediator complex subunit 13-like(Med13l)
ENSMUSG00000035067	XKR6	Mus musculus	X-linked Kx blood group related 6(Xkr6)
ENSMUSG00000092341	MALAT1	Mus musculus	metastasis associated lung adenocarcinoma transcript 1 (non-coding RNA)(Malat1)
ENSMUSG00000059586	NSMCE2	Mus musculus	NSE2/MMS21 homolog, SMC5-SMC6 complex SUMO ligase(Nsmce2)
ENSMUSG00000038780	SMURF1	Mus musculus	SMAD specific E3 ubiquitin protein ligase 1(Smurf1)
ENSMUSG00000046415	B430212C06Rik	Mus musculus	RIKEN cDNA B430212C06 gene(B430212C06Rik)
ENSMUSG00000019841	REV3L	Mus musculus	REV3 like, DNA directed polymerase zeta catalytic subunit(Rev3l)
ENSMUSG00000065954	TACC1	Mus musculus	transforming, acidic coiled-coil containing protein 1(Tacc1)
ENSMUSG00000033983	COIL	Mus musculus	coilin(Coil)
ENSMUSG00000035133	ARHGAP5	Mus musculus	Rho GTPase activating protein 5(Arhgap5)
ENSMUSG00000039458	MTMR12	Mus musculus	myotubularin related protein 12(Mtmr12)
ENSMUSG00000039835	NHSL1	Mus musculus	NHS-like 1(Nhsl1)
ENSMUSG00000030553	PGPEP1L	Mus musculus	pyroglutamyl-peptidase I-like(Pgpep1l)
ENSMUSG00000025726	SLC28A1	Mus musculus	solute carrier family 28 (sodium-coupled nucleoside transporter), member 1(Slc28a1)
ENSMUSG00000000305	CDH4	Mus musculus	cadherin 4(Cdh4)
ENSMUSG00000038587	AKAP12	Mus musculus	A kinase (PRKA) anchor protein (gravin) 12(Akap12)
ENSMUSG00000055204	ANKRD17	Mus musculus	ankyrin repeat domain 17(Ankrd17)
ENSMUSG00000029673	AUTS2	Mus musculus	autism susceptibility candidate 2(Auts2)
ENSMUSG00000068923	SYT11	Mus musculus	synaptotagmin XI(Syt11)
ENSMUSG00000024563	SMAD2	Mus musculus	SMAD family member 2(Smad2)
ENSMUSG00000032586	TRAIP	Mus musculus	TRAF-interacting protein(Traip)
ENSMUSG00000040761	SPEN	Mus musculus	SPEN homolog, transcriptional regulator (Drosophila)(Spen)
ENSMUSG00000041670	RIMS1	Mus musculus	regulating synaptic membrane exocytosis 1(Rims1)
ENSMUSG00000028152	TSPAN5	Mus musculus	tetraspanin 5(Tspan5)
ENSMUSG00000015656	HSPA8	Mus musculus	heat shock protein 8(Hspa8)
ENSMUSG00000031714	GAB1	Mus musculus	growth factor receptor bound protein 2-associated protein 1(Gab1)
ENSMUSG00000094443	Sgol2b	Mus musculus	shugoshin like 2b (S. pombe)(Sgol2b)
ENSMUSG00000028649	MACF1	Mus musculus	microtubule-actin crosslinking factor 1(Macf1)
ENSMUSG00000039233	TBCE	Mus musculus	tubulin-specific chaperone E(Tbce)
ENSMUSG00000102543	PCDHGC5	Mus musculus	protocadherin gamma subfamily C, 5(Pcdhgc5)
ENSMUSG00000090266	METTL23	Mus musculus	methyltransferase like 23(Mettl23)
ENSMUSG00000052363	ZDHHC19	Mus musculus	zinc finger, DHHC domain containing 19(Zdhhc19)
ENSMUSG00000039842	mcph1	Mus musculus	microcephaly, primary autosomal recessive 1(Mcph1)
ENSMUSG00000051650	B3GNT2	Mus musculus	UDP-GlcNAc:betaGal beta-1,3-N-acetylglucosaminyltransferase 2(B3gnt2)
ENSMUSG00000069833	AHNAK	Mus musculus	AHNAK nucleoprotein (desmoyokin)(Ahnak)
ENSMUSG00000039844	RAPGEF1	Mus musculus	Rap guanine nucleotide exchange factor (GEF) 1(Rapgef1)
ENSMUSG00000035203	EPN1	Mus musculus	epsin 1(Epn1)
ENSMUSG00000001985	GRIK3	Mus musculus	glutamate receptor, ionotropic, kainate 3(Grik3)
ENSMUSG00000030088	ALDH1L1	Mus musculus	aldehyde dehydrogenase 1 family, member L1(Aldh1l1)
ENSMUSG00000025314	PTPRJ	Mus musculus	protein tyrosine phosphatase, receptor type, J(Ptprj)
ENSMUSG00000064194	Zfp936	Mus musculus	zinc finger protein 936(Zfp936)
ENSMUSG00000046201	scaf8	Mus musculus	SR-related CTD-associated factor 8(Scaf8)
ENSMUSG00000036617	ETL4	Mus musculus	enhancer trap locus 4(Etl4)
ENSMUSG00000038729	AKAP2	Mus musculus	A kinase (PRKA) anchor protein 2(Akap2)
ENSMUSG00000031701	DNAJA2	Mus musculus	DnaJ heat shock protein family (Hsp40) member A2(Dnaja2)
ENSMUSG00000028165	CISD2	Mus musculus	CDGSH iron sulfur domain 2(Cisd2)
ENSMUSG00000002031	IFT46	Mus musculus	intraflagellar transport 46(Ift46)
ENSMUSG00000052353	cemip	Mus musculus	cell migration inducing protein, hyaluronan binding(Cemip)
ENSMUSG00000063019	MANBAL	Mus musculus	mannosidase, beta A, lysosomal-like(Manbal)
ENSMUSG00000097039	Pvt1	Mus musculus	plasmacytoma variant translocation 1(Pvt1)
ENSMUSG00000070544	TOP1	Mus musculus	topoisomerase (DNA) I(Top1)
ENSMUSG00000069729	ARID1B	Mus musculus	AT rich interactive domain 1B (SWI-like)(Arid1b)
ENSMUSG00000014074	RNF168	Mus musculus	ring finger protein 168(Rnf168)
ENSMUSG00000050122	VWA3B	Mus musculus	von Willebrand factor A domain containing 3B(Vwa3b)
ENSMUSG00000032036	KIRREL3	Mus musculus	kin of IRRE like 3 (Drosophila)(Kirrel3)
ENSMUSG00000078671	CHD2	Mus musculus	chromodomain helicase DNA binding protein 2(Chd2)
ENSMUSG00000001995	SIPA1L2	Mus musculus	signal-induced proliferation-associated 1 like 2(Sipa1l2)
ENSMUSG00000062078	Qk	Mus musculus	quaking(Qk)
ENSMUSG00000044250	PCED1B	Mus musculus	PC-esterase domain containing 1B(Pced1b)
ENSMUSG00000102222	PCDHGA10	Mus musculus	protocadherin gamma subfamily A, 10(Pcdhga10)
ENSMUSG00000102428	PCDHGA12	Mus musculus	protocadherin gamma subfamily A, 12(Pcdhga12)
ENSMUSG00000049295	Zfp219	Mus musculus	zinc finger protein 219(Zfp219)
ENSMUSG00000078765	U2AF1L4	Mus musculus	U2 small nuclear RNA auxiliary factor 1-like 4(U2af1l4)
ENSMUSG00000025423	PIAS2	Mus musculus	protein inhibitor of activated STAT 2(Pias2)
ENSMUSG00000071226	CECR2	Mus musculus	cat eye syndrome chromosome region, candidate 2(Cecr2)
ENSMUSG00000032998	FOXJ3	Mus musculus	forkhead box J3(Foxj3)
ENSMUSG00000028177	1810013D15Rik	Mus musculus	RIKEN cDNA 1810013D15 gene(1810013D15Rik)
ENSMUSG00000025420	KATNAL2	Mus musculus	katanin p60 subunit A-like 2(Katnal2)
ENSMUSG00000002983	RELB	Mus musculus	avian reticuloendotheliosis viral (v-rel) oncogene related B(Relb)
ENSMUSG00000059659	Gm10069	Mus musculus	predicted gene 10069(Gm10069)
ENSMUSG00000005533	IGF1R	Mus musculus	insulin-like growth factor I receptor(Igf1r)
ENSMUSG00000005672	KIT	Mus musculus	kit oncogene(Kit)
ENSMUSG00000040111	GRAMD1B	Mus musculus	GRAM domain containing 1B(Gramd1b)
ENSMUSG00000061576	DPP6	Mus musculus	dipeptidylpeptidase 6(Dpp6)
ENSMUSG00000097048	1600020E01Rik	Mus musculus	RIKEN cDNA 1600020E01 gene(1600020E01Rik)
ENSMUSG00000052928	CTIF	Mus musculus	CBP80/20-dependent translation initiation factor(Ctif)
ENSMUSG00000002227	MOV10	Mus musculus	Moloney leukemia virus 10(Mov10)
ENSMUSG00000041654	SLC39A11	Mus musculus	solute carrier family 39 (metal ion transporter), member 11(Slc39a11)
ENSMUSG00000039218	SRRM2	Mus musculus	serine/arginine repetitive matrix 2(Srrm2)
ENSMUSG00000024983	VTI1A	Mus musculus	vesicle transport through interaction with t-SNAREs 1A(Vti1a)
ENSMUSG00000049971	GLT1D1	Mus musculus	glycosyltransferase 1 domain containing 1(Glt1d1)
ENSMUSG00000006304	ARPC2	Mus musculus	actin related protein 2/3 complex, subunit 2(Arpc2)
ENSMUSG00000002870	MCM2	Mus musculus	minichromosome maintenance complex component 2(Mcm2)
ENSMUSG00000032017	GRIK4	Mus musculus	glutamate receptor, ionotropic, kainate 4(Grik4)
ENSMUSG00000097622	A330033J07Rik	Mus musculus	RIKEN cDNA A330033J07 gene(A330033J07Rik)
ENSMUSG00000040128	PNRC1	Mus musculus	proline-rich nuclear receptor coactivator 1(Pnrc1)
ENSMUSG00000052336	CX3CR1	Mus musculus	chemokine (C-X3-C motif) receptor 1(Cx3cr1)
ENSMUSG00000069601	ANK3	Mus musculus	ankyrin 3, epithelial(Ank3)
ENSMUSG00000002489	TIAM1	Mus musculus	T cell lymphoma invasion and metastasis 1(Tiam1)
ENSMUSG00000055799	TCF7L1	Mus musculus	transcription factor 7 like 1 (T cell specific, HMG box)(Tcf7l1)
ENSMUSG00000089945	Pakap	Mus musculus	paralemmin A kinase anchor protein(Pakap)
ENSMUSG00000032827	PPP1R9A	Mus musculus	protein phosphatase 1, regulatory (inhibitor) subunit 9A(Ppp1r9a)
ENSMUSG00000050917	FGF4	Mus musculus	fibroblast growth factor 4(Fgf4)
ENSMUSG00000021464	ROR2	Mus musculus	receptor tyrosine kinase-like orphan receptor 2(Ror2)
ENSMUSG00000032015	POU2F3	Mus musculus	POU domain, class 2, transcription factor 3(Pou2f3)
ENSMUSG00000032826	ANK2	Mus musculus	ankyrin 2, brain(Ank2)
ENSMUSG00000042390	GATAD2B	Mus musculus	GATA zinc finger domain containing 2B(Gatad2b)
ENSMUSG00000005371	FBXO11	Mus musculus	F-box protein 11(Fbxo11)
ENSMUSG00000042348	ARL15	Mus musculus	ADP-ribosylation factor-like 15(Arl15)
ENSMUSG00000043535	SETX	Mus musculus	senataxin(Setx)
ENSMUSG00000004364	CUL3	Mus musculus	cullin 3(Cul3)
ENSMUSG00000032348	GSTA4	Mus musculus	glutathione S-transferase, alpha 4(Gsta4)
ENSMUSG00000032548	SLCO2A1	Mus musculus	solute carrier organic anion transporter family, member 2a1(Slco2a1)
ENSMUSG00000022995	ENAH	Mus musculus	enabled homolog (Drosophila)(Enah)
ENSMUSG00000017417	PLXDC1	Mus musculus	plexin domain containing 1(Plxdc1)
ENSMUSG00000028745	CAPZB	Mus musculus	capping protein (actin filament) muscle Z-line, beta(Capzb)
ENSMUSG00000054008	NDST1	Mus musculus	N-deacetylase/N-sulfotransferase (heparan glucosaminyl) 1(Ndst1)
ENSMUSG00000058186	Zfp980	Mus musculus	zinc finger protein 980(Zfp980)
ENSMUSG00000100583	Gm29443	Mus musculus	predicted gene 29443(Gm29443)
ENSMUSG00000060475	WTAP	Mus musculus	Wilms tumour 1-associating protein(Wtap)
ENSMUSG00000024867	PIP5K1B	Mus musculus	phosphatidylinositol-4-phosphate 5-kinase, type 1 beta(Pip5k1b)
ENSMUSG00000059439	BCAS3	Mus musculus	breast carcinoma amplified sequence 3(Bcas3)
ENSMUSG00000102440	PCDHGA9	Mus musculus	protocadherin gamma subfamily A, 9(Pcdhga9)
ENSMUSG00000043323	FBRSL1	Mus musculus	fibrosin-like 1(Fbrsl1)
ENSMUSG00000032485	SCAP	Mus musculus	SREBF chaperone(Scap)
ENSMUSG00000060477	IRAK2	Mus musculus	interleukin-1 receptor-associated kinase 2(Irak2)
ENSMUSG00000034518	HMGXB4	Mus musculus	HMG box domain containing 4(Hmgxb4)
ENSMUSG00000058230	arhgap35	Mus musculus	Rho GTPase activating protein 35(Arhgap35)
ENSMUSG00000103585	PCDHGB4	Mus musculus	protocadherin gamma subfamily B, 4(Pcdhgb4)
ENSMUSG00000040209	Zfp704	Mus musculus	zinc finger protein 704(Zfp704)
ENSMUSG00000040717	IL17RD	Mus musculus	interleukin 17 receptor D(Il17rd)
ENSMUSG00000051747	TTN	Mus musculus	titin(Ttn)
ENSMUSG00000036180	GATAD2A	Mus musculus	GATA zinc finger domain containing 2A(Gatad2a)
ENSMUSG00000058440	NRF1	Mus musculus	nuclear respiratory factor 1(Nrf1)
ENSMUSG00000055436	SRSF11	Mus musculus	serine/arginine-rich splicing factor 11(Srsf11)
ENSMUSG00000032530	LYZL4	Mus musculus	lysozyme-like 4(Lyzl4)
ENSMUSG00000002372	RANBP3	Mus musculus	RAN binding protein 3(Ranbp3)
ENSMUSG00000074862	BC025920	Mus musculus	zinc finger protein pseudogene(BC025920)
ENSMUSG00000016028	CELSR1	Mus musculus	cadherin, EGF LAG seven-pass G-type receptor 1(Celsr1)
ENSMUSG00000089865	DYX1C1	Mus musculus	dyslexia susceptibility 1 candidate 1(Dyx1c1)
ENSMUSG00000052698	TLN2	Mus musculus	talin 2(Tln2)
ENSMUSG00000074867	Zfp808	Mus musculus	zinc finger protein 80(Zfp808)
ENSMUSG00000024213	NUDT3	Mus musculus	nudix (nucleotide diphosphate linked moiety X)-type motif 3(Nudt3)
ENSMUSG00000075122	CD80	Mus musculus	CD80 antigen(Cd80)
ENSMUSG00000005506	CELF1	Mus musculus	CUGBP, Elav-like family member 1(Celf1)
ENSMUSG00000034714	TTYH2	Mus musculus	tweety family member 2(Ttyh2)
ENSMUSG00000039262	PRRC2B	Mus musculus	proline-rich coiled-coil 2B(Prrc2b)
ENSMUSG00000074634	TMEM267	Mus musculus	transmembrane protein 267(Tmem267)
ENSMUSG00000004383	LARGE1	Mus musculus	LARGE xylosyl- and glucuronyltransferase 1(Large1)
ENSMUSG00000036053	FMNL2	Mus musculus	formin-like 2(Fmnl2)
ENSMUSG00000025085	ABLIM1	Mus musculus	actin-binding LIM protein 1(Ablim1)
ENSMUSG00000042460	C1GALT1	Mus musculus	core 1 synthase, glycoprotein-N-acetylgalactosamine 3-beta-galactosyltransferase, 1(C1galt1)
ENSMUSG00000105265	sox2ot	Mus musculus	SOX2 overlapping transcript (non-protein coding)(Sox2ot)
ENSMUSG00000044499	HS3ST5	Mus musculus	heparan sulfate (glucosamine) 3-O-sulfotransferase 5(Hs3st5)
ENSMUSG00000043301	KCNJ6	Mus musculus	potassium inwardly-rectifying channel, subfamily J, member 6(Kcnj6)
ENSMUSG00000033713	FOXN3	Mus musculus	forkhead box N3(Foxn3)
ENSMUSG00000017550	ATAD5	Mus musculus	ATPase family, AAA domain containing 5(Atad5)
ENSMUSG00000014932	YES1	Mus musculus	YES proto-oncogene 1, Src family tyrosine kinase(Yes1)
ENSMUSG00000097589	Dleu2	Mus musculus	deleted in lymphocytic leukemia, 2(Dleu2)
ENSMUSG00000021222	DCAF4	Mus musculus	DDB1 and CUL4 associated factor 4(Dcaf4)
ENSMUSG00000036779	PAPD5	Mus musculus	PAP associated domain containing 5(Papd5)
ENSMUSG00000023467	TULP2	Mus musculus	tubby-like protein 2(Tulp2)
ENSMUSG00000053436	MAPK14	Mus musculus	mitogen-activated protein kinase 14(Mapk14)
ENSMUSG00000024002	BRD4	Mus musculus	bromodomain containing 4(Brd4)
ENSMUSG00000001930	VWF	Mus musculus	Von Willebrand factor(Vwf)
ENSMUSG00000058056	PALLD	Mus musculus	palladin, cytoskeletal associated protein(Palld)
ENSMUSG00000079259	TRIM71	Mus musculus	tripartite motif-containing 71(Trim71)
ENSMUSG00000024539	PTPN2	Mus musculus	protein tyrosine phosphatase, non-receptor type 2(Ptpn2)
ENSMUSG00000050953	GJA1	Mus musculus	gap junction protein, alpha 1(Gja1)
ENSMUSG00000054808	ACTN4	Mus musculus	actinin alpha 4(Actn4)
ENSMUSG00000041297	CDK13	Mus musculus	cyclin-dependent kinase 13(Cdk13)
ENSMUSG00000097584	1700125G22Rik	Mus musculus	RIKEN cDNA 1700125G22 gene(1700125G22Rik)
ENSMUSG00000029381	SHROOM3	Mus musculus	shroom family member 3(Shroom3)
ENSMUSG00000061665	CD2AP	Mus musculus	CD2-associated protein(Cd2ap)
ENSMUSG00000048445	CCDC57	Mus musculus	coiled-coil domain containing 57(Ccdc57)
ENSMUSG00000029178	KLF3	Mus musculus	Kruppel-like factor 3 (basic)(Klf3)
ENSMUSG00000051339	2900026A02Rik	Mus musculus	RIKEN cDNA 2900026A02 gene(2900026A02Rik)
ENSMUSG00000037058	PAIP2	Mus musculus	polyadenylate-binding protein-interacting protein 2(Paip2)
ENSMUSG00000044950	PWWP2A	Mus musculus	PWWP domain containing 2A(Pwwp2a)
ENSMUSG00000030117	GDF3	Mus musculus	growth differentiation factor 3(Gdf3)
ENSMUSG00000022500	LITAF	Mus musculus	LPS-induced TN factor(Litaf)
ENSMUSG00000048240	GNG7	Mus musculus	guanine nucleotide binding protein (G protein), gamma 7(Gng7)
ENSMUSG00000056899	IMMP2L	Mus musculus	IMP2 inner mitochondrial membrane peptidase-like (S. cerevisiae)(Immp2l)
ENSMUSG00000030257	SRGAP3	Mus musculus	SLIT-ROBO Rho GTPase activating protein 3(Srgap3)
ENSMUSG00000104346	PCDHGA3	Mus musculus	protocadherin gamma subfamily A, 3(Pcdhga3)
ENSMUSG00000034187	NSF	Mus musculus	N-ethylmaleimide sensitive fusion protein(Nsf)
ENSMUSG00000044813	SHB	Mus musculus	src homology 2 domain-containing transforming protein B(Shb)
ENSMUSG00000103749	PCDHGB5	Mus musculus	protocadherin gamma subfamily B, 5(Pcdhgb5)
ENSMUSG00000044017	ADGRD1	Mus musculus	adhesion G protein-coupled receptor D1(Adgrd1)
ENSMUSG00000017631	ABR	Mus musculus	active BCR-related gene(Abr)
ENSMUSG00000020400	TNIP1	Mus musculus	TNFAIP3 interacting protein 1(Tnip1)
ENSMUSG00000035569	ANKRD11	Mus musculus	ankyrin repeat domain 11(Ankrd11)
ENSMUSG00000043857	MGAT5B	Mus musculus	mannoside acetylglucosaminyltransferase 5, isoenzyme B(Mgat5b)
ENSMUSG00000014444	PIEZO1	Mus musculus	piezo-type mechanosensitive ion channel component 1(Piezo1)
ENSMUSG00000050310	RICTOR	Mus musculus	RPTOR independent companion of MTOR, complex 2(Rictor)
ENSMUSG00000086003	B230206L02Rik	Mus musculus	RIKEN cDNA B230206L02 gene(B230206L02Rik)
ENSMUSG00000024780	CDC37L1	Mus musculus	cell division cycle 37-like 1(Cdc37l1)
ENSMUSG00000036030	PRTG	Mus musculus	protogenin(Prtg)
ENSMUSG00000024642	TLE4	Mus musculus	transducin-like enhancer of split 4(Tle4)
ENSMUSG00000027109	SP3	Mus musculus	trans-acting transcription factor 3(Sp3)
ENSMUSG00000074698	CSNK2A1	Mus musculus	casein kinase 2, alpha 1 polypeptide(Csnk2a1)
ENSMUSG00000103677	PCDHGA4	Mus musculus	protocadherin gamma subfamily A, 4(Pcdhga4)
ENSMUSG00000027778	IFT80	Mus musculus	intraflagellar transport 80(Ift80)
ENSMUSG00000030268	BCAT1	Mus musculus	branched chain aminotransferase 1, cytosolic(Bcat1)
ENSMUSG00000021270	HSP90AA1	Mus musculus	heat shock protein 90, alpha (cytosolic), class A member 1(Hsp90aa1)
ENSMUSG00000016477	E2F3	Mus musculus	E2F transcription factor 3(E2f3)
ENSMUSG00000057098	EBF1	Mus musculus	early B cell factor 1(Ebf1)
ENSMUSG00000021133	SUSD6	Mus musculus	sushi domain containing 6(Susd6)
ENSMUSG00000034998	FOXN2	Mus musculus	forkhead box N2(Foxn2)
ENSMUSG00000021686	AP3B1	Mus musculus	adaptor-related protein complex 3, beta 1 subunit(Ap3b1)
ENSMUSG00000051355	COMMD1	Mus musculus	COMM domain containing 1(Commd1)
ENSMUSG00000050737	PTGES	Mus musculus	prostaglandin E synthase(Ptges)
ENSMUSG00000047821	TRIM16	Mus musculus	tripartite motif-containing 16(Trim16)
ENSMUSG00000090053	PALM2	Mus musculus	paralemmin 2(Palm2)
ENSMUSG00000054648	Zfp869	Mus musculus	zinc finger protein 869(Zfp869)
ENSMUSG00000031665	SALL1	Mus musculus	sal-like 1 (Drosophila)(Sall1)
ENSMUSG00000022521	CREBBP	Mus musculus	CREB binding protein(Crebbp)
ENSMUSG00000034165	CCND3	Mus musculus	cyclin D3(Ccnd3)
ENSMUSG00000069769	MSI2	Mus musculus	musashi RNA-binding protein 2(Msi2)
ENSMUSG00000103567	PCDHGA5	Mus musculus	protocadherin gamma subfamily A, 5(Pcdhga5)
ENSMUSG00000034994	EEF2	Mus musculus	eukaryotic translation elongation factor 2(Eef2)
ENSMUSG00000032202	RAB27A	Mus musculus	RAB27A, member RAS oncogene family(Rab27a)
ENSMUSG00000036568	GLTSCR1L	Mus musculus	GLTSCR1-like(Gltscr1l)
ENSMUSG00000041992	RAPGEF5	Mus musculus	Rap guanine nucleotide exchange factor (GEF) 5(Rapgef5)
ENSMUSG00000045822	ZSWIM3	Mus musculus	zinc finger SWIM-type containing 3(Zswim3)
ENSMUSG00000071856	MCC	Mus musculus	mutated in colorectal cancers(Mcc)
ENSMUSG00000004936	MAP2K1	Mus musculus	mitogen-activated protein kinase kinase 1(Map2k1)
ENSMUSG00000010342	TEX14	Mus musculus	testis expressed gene 14(Tex14)
ENSMUSG00000034563	CCPG1	Mus musculus	cell cycle progression 1(Ccpg1)
ENSMUSG00000049807	ARHGAP23	Mus musculus	Rho GTPase activating protein 23(Arhgap23)
ENSMUSG00000020422	TNS3	Mus musculus	tensin 3(Tns3)
ENSMUSG00000049313	SORL1	Mus musculus	sortilin-related receptor, LDLR class A repeats-containing(Sorl1)
ENSMUSG00000047126	CLTC	Mus musculus	clathrin, heavy polypeptide (Hc)(Cltc)
ENSMUSG00000021255	ESRRB	Mus musculus	estrogen related receptor, beta(Esrrb)
ENSMUSG00000044707	ccnjl	Mus musculus	cyclin J-like(Ccnjl)
ENSMUSG00000034154	INO80	Mus musculus	INO80 complex subunit(Ino80)
ENSMUSG00000035407	KANK4	Mus musculus	KN motif and ankyrin repeat domains 4(Kank4)
ENSMUSG00000001542	ELL2	Mus musculus	elongation factor RNA polymerase II 2(Ell2)
ENSMUSG00000041997	TLK1	Mus musculus	tousled-like kinase 1(Tlk1)
ENSMUSG00000021699	PDE4D	Mus musculus	phosphodiesterase 4D, cAMP specific(Pde4d)
ENSMUSG00000021895	ARHGEF3	Mus musculus	Rho guanine nucleotide exchange factor (GEF) 3(Arhgef3)
ENSMUSG00000009894	SNAP47	Mus musculus	synaptosomal-associated protein, 47(Snap47)
ENSMUSG00000041624	GUCY1A2	Mus musculus	guanylate cyclase 1, soluble, alpha 2(Gucy1a2)
ENSMUSG00000061286	EXOSC5	Mus musculus	exosome component 5(Exosc5)
ENSMUSG00000027010	SLC25A12	Mus musculus	solute carrier family 25 (mitochondrial carrier, Aralar), member 12(Slc25a12)
ENSMUSG00000032113	CHEK1	Mus musculus	checkpoint kinase 1(Chek1)
ENSMUSG00000074398	Gm15441	Mus musculus	predicted gene 15441(Gm15441)
ENSMUSG00000018340	ANXA6	Mus musculus	annexin A6(Anxa6)
ENSMUSG00000028677	RNF220	Mus musculus	ring finger protein 220(Rnf220)
ENSMUSG00000020530	GGNBP2	Mus musculus	gametogenetin binding protein 2(Ggnbp2)
ENSMUSG00000032212	SLTM	Mus musculus	SAFB-like, transcription modulator(Sltm)
ENSMUSG00000031216	STARD8	Mus musculus	START domain containing 8(Stard8)
ENSMUSG00000031925	MAML2	Mus musculus	mastermind like 2 (Drosophila)(Maml2)
ENSMUSG00000023932	CDC5L	Mus musculus	cell division cycle 5-like (S. pombe)(Cdc5l)
ENSMUSG00000028282	CASP8AP2	Mus musculus	caspase 8 associated protein 2(Casp8ap2)
ENSMUSG00000047907	TSHZ2	Mus musculus	teashirt zinc finger family member 2(Tshz2)
ENSMUSG00000031540	KAT6A	Mus musculus	K(lysine) acetyltransferase 6A(Kat6a)
ENSMUSG00000004865	SRPK1	Mus musculus	serine/arginine-rich protein specific kinase 1(Srpk1)
ENSMUSG00000030494	RHPN2	Mus musculus	rhophilin, Rho GTPase binding protein 2(Rhpn2)
ENSMUSG00000023935	SPATS1	Mus musculus	spermatogenesis associated, serine-rich 1(Spats1)
ENSMUSG00000020634	UBXN2A	Mus musculus	UBX domain protein 2A(Ubxn2a)
ENSMUSG00000021767	KAT6B	Mus musculus	K(lysine) acetyltransferase 6B(Kat6b)
ENSMUSG00000030352	TSPAN9	Mus musculus	tetraspanin 9(Tspan9)
ENSMUSG00000098008	A930001A20Rik	Mus musculus	RIKEN cDNA A930001A20 gene(A930001A20Rik)
ENSMUSG00000031826	USP10	Mus musculus	ubiquitin specific peptidase 10(Usp10)
ENSMUSG00000018334	KSR1	Mus musculus	kinase suppressor of ras 1(Ksr1)
ENSMUSG00000030970	CTBP2	Mus musculus	C-terminal binding protein 2(Ctbp2)
ENSMUSG00000032220	MYO1E	Mus musculus	myosin IE(Myo1e)
ENSMUSG00000026604	PTPN14	Mus musculus	protein tyrosine phosphatase, non-receptor type 14(Ptpn14)
ENSMUSG00000029120	PPP2R2C	Mus musculus	protein phosphatase 2, regulatory subunit B, gamma(Ppp2r2c)
ENSMUSG00000014245	PIGL	Mus musculus	phosphatidylinositol glycan anchor biosynthesis, class L(Pigl)
ENSMUSG00000047141	Zfp654	Mus musculus	zinc finger protein 654(Zfp654)
ENSMUSG00000063524	ENO1	Mus musculus	enolase 1, alpha non-neuron(Eno1)
ENSMUSG00000025025	MXI1	Mus musculus	MAX interactor 1, dimerization protein(Mxi1)
ENSMUSG00000028274	RNGTT	Mus musculus	RNA guanylyltransferase and 5'-phosphatase(Rngtt)
ENSMUSG00000013701	TIMM23	Mus musculus	translocase of inner mitochondrial membrane 23(Timm23)
ENSMUSG00000030979	UROS	Mus musculus	uroporphyrinogen III synthase(Uros)
ENSMUSG00000025027	XPNPEP1	Mus musculus	X-prolyl aminopeptidase (aminopeptidase P) 1, soluble(Xpnpep1)
ENSMUSG00000031758	CDYL2	Mus musculus	chromodomain protein, Y chromosome-like 2(Cdyl2)
ENSMUSG00000036206	SH3BP4	Mus musculus	SH3-domain binding protein 4(Sh3bp4)
ENSMUSG00000003421	NOSIP	Mus musculus	nitric oxide synthase interacting protein(Nosip)
ENSMUSG00000015932	DSTN	Mus musculus	destrin(Dstn)
ENSMUSG00000028693	NASP	Mus musculus	nuclear autoantigenic sperm protein (histone-binding)(Nasp)
ENSMUSG00000055373	FUT9	Mus musculus	fucosyltransferase 9(Fut9)
ENSMUSG00000023505	CDCA3	Mus musculus	cell division cycle associated 3(Cdca3)
ENSMUSG00000022861	DGKG	Mus musculus	diacylglycerol kinase, gamma(Dgkg)
ENSMUSG00000030276	TTLL3	Mus musculus	tubulin tyrosine ligase-like family, member 3(Ttll3)
ENSMUSG00000060206	Zfp462	Mus musculus	zinc finger protein 462(Zfp462)
ENSMUSG00000018593	SPARC	Mus musculus	secreted acidic cysteine rich glycoprotein(Sparc)
ENSMUSG00000024991	EIF3A	Mus musculus	eukaryotic translation initiation factor 3, subunit A(Eif3a)
ENSMUSG00000061689	DLGAP4	Mus musculus	discs, large homolog-associated protein 4 (Drosophila)(Dlgap4)
ENSMUSG00000023915	TNFRSF21	Mus musculus	tumor necrosis factor receptor superfamily, member 21(Tnfrsf21)
ENSMUSG00000021096	PPM1A	Mus musculus	protein phosphatase 1A, magnesium dependent, alpha isoform(Ppm1a)
ENSMUSG00000025019	LCOR	Mus musculus	ligand dependent nuclear receptor corepressor(Lcor)
ENSMUSG00000005566	TRIM28	Mus musculus	tripartite motif-containing 28(Trim28)
ENSMUSG00000044835	ANKRD45	Mus musculus	ankyrin repeat domain 45(Ankrd45)
ENSMUSG00000057738	SPTAN1	Mus musculus	spectrin alpha, non-erythrocytic 1(Sptan1)
ENSMUSG00000051391	YWHAG	Mus musculus	tyrosine 3-monooxygenase/tryptophan 5-monooxygenase activation protein, gamma polypeptide(Ywhag)
ENSMUSG00000058704	MEMO1	Mus musculus	mediator of cell motility 1(Memo1)
ENSMUSG00000003452	BICD1	Mus musculus	bicaudal D homolog 1 (Drosophila)(Bicd1)
ENSMUSG00000014496	ANKRD28	Mus musculus	ankyrin repeat domain 28(Ankrd28)
ENSMUSG00000063410	STK24	Mus musculus	serine/threonine kinase 24(Stk24)
ENSMUSG00000044646	ZBTB7C	Mus musculus	zinc finger and BTB domain containing 7C(Zbtb7c)
ENSMUSG00000103081	Pcdhgb8	Mus musculus	protocadherin gamma subfamily B, 8(Pcdhgb8)
ENSMUSG00000020661	DNMT3A	Mus musculus	DNA methyltransferase 3A(Dnmt3a)
ENSMUSG00000036822	TOPORS	Mus musculus	topoisomerase I binding, arginine/serine-rich(Topors)
ENSMUSG00000015755	TAB2	Mus musculus	TGF-beta activated kinase 1/MAP3K7 binding protein 2(Tab2)
ENSMUSG00000021796	BMPR1A	Mus musculus	bone morphogenetic protein receptor, type 1A(Bmpr1a)
ENSMUSG00000103897	PCDHGA8	Mus musculus	protocadherin gamma subfamily A, 8(Pcdhga8)
ENSMUSG00000103088	PCDHGB6	Mus musculus	protocadherin gamma subfamily B, 6(Pcdhgb6)
ENSMUSG00000103793	PCDHGA6	Mus musculus	protocadherin gamma subfamily A, 6(Pcdhga6)
ENSMUSG00000044948	Cfap43	Mus musculus	cilia and flagella associated protein 43(Cfap43)
ENSMUSG00000024073	BIRC6	Mus musculus	baculoviral IAP repeat-containing 6(Birc6)
ENSMUSG00000069089	CDK7	Mus musculus	cyclin-dependent kinase 7(Cdk7)
ENSMUSG00000034295	FHOD3	Mus musculus	formin homology 2 domain containing 3(Fhod3)
ENSMUSG00000023017	asic1	Mus musculus	acid-sensing (proton-gated) ion channel 1(Asic1)
ENSMUSG00000031024	ST5	Mus musculus	suppression of tumorigenicity 5(St5)
ENSMUSG00000024070	PRKD3	Mus musculus	protein kinase D3(Prkd3)
ENSMUSG00000070733	FRYL	Mus musculus	FRY like transcription coactivator(Fryl)
ENSMUSG00000031533	MRPS31	Mus musculus	mitochondrial ribosomal protein S31(Mrps31)
ENSMUSG00000030283	ST8SIA1	Mus musculus	ST8 alpha-N-acetyl-neuraminide alpha-2,8-sialyltransferase 1(St8sia1)
ENSMUSG00000025006	sorbs1	Mus musculus	sorbin and SH3 domain containing 1(Sorbs1)
ENSMUSG00000054770	KCTD18	Mus musculus	potassium channel tetramerisation domain containing 18(Kctd18)
ENSMUSG00000023809	RPS6KA2	Mus musculus	ribosomal protein S6 kinase, polypeptide 2(Rps6ka2)
ENSMUSG00000022652	MORC1	Mus musculus	microrchidia 1(Morc1)
ENSMUSG00000032249	ANP32A	Mus musculus	acidic (leucine-rich) nuclear phosphoprotein 32 family, member A(Anp32a)
ENSMUSG00000044033	CCDC141	Mus musculus	coiled-coil domain containing 141(Ccdc141)
ENSMUSG00000031731	AP1G1	Mus musculus	adaptor protein complex AP-1, gamma 1 subunit(Ap1g1)
ENSMUSG00000070047	FAT1	Mus musculus	FAT atypical cadherin 1(Fat1)
ENSMUSG00000031954	CFDP1	Mus musculus	craniofacial development protein 1(Cfdp1)
ENSMUSG00000028397	KDM4C	Mus musculus	lysine (K)-specific demethylase 4C(Kdm4c)
ENSMUSG00000001687	UBL3	Mus musculus	ubiquitin-like 3(Ubl3)
ENSMUSG00000030956	FAM53B	Mus musculus	family with sequence similarity 53, member B(Fam53b)
ENSMUSG00000025969	NRP2	Mus musculus	neuropilin 2(Nrp2)
ENSMUSG00000033581	IGF2BP2	Mus musculus	insulin-like growth factor 2 mRNA binding protein 2(Igf2bp2)
ENSMUSG00000059248	SEPT9	Mus musculus	septin 9(Sept9)
ENSMUSG00000009828	ICK	Mus musculus	intestinal cell kinase(Ick)
ENSMUSG00000037860	AIM2	Mus musculus	absent in melanoma 2(Aim2)
ENSMUSG00000001089	LUZP1	Mus musculus	leucine zipper protein 1(Luzp1)
ENSMUSG00000029512	ULK1	Mus musculus	unc-51 like kinase 1(Ulk1)
ENSMUSG00000035765	DYM	Mus musculus	dymeclin(Dym)
ENSMUSG00000099370	Platr10	Mus musculus	pluripotency associated transcript 10(Platr10)
ENSMUSG00000033502	CDC14A	Mus musculus	CDC14 cell division cycle 14A(Cdc14a)
ENSMUSG00000025195	dnmbp	Mus musculus	dynamin binding protein(Dnmbp)
ENSMUSG00000023027	ATF1	Mus musculus	activating transcription factor 1(Atf1)
ENSMUSG00000037375	HHAT	Mus musculus	hedgehog acyltransferase(Hhat)
ENSMUSG00000030064	FRMD4B	Mus musculus	FERM domain containing 4B(Frmd4b)
ENSMUSG00000015766	EPS8	Mus musculus	epidermal growth factor receptor pathway substrate 8(Eps8)
ENSMUSG00000048701	CCDC6	Mus musculus	coiled-coil domain containing 6(Ccdc6)
ENSMUSG00000030313	DENND5B	Mus musculus	DENN/MADD domain containing 5B(Dennd5b)
ENSMUSG00000056515	RAB31	Mus musculus	RAB31, member RAS oncogene family(Rab31)
ENSMUSG00000022443	MYH9	Mus musculus	myosin, heavy polypeptide 9, non-muscle(Myh9)
ENSMUSG00000029916	AGK	Mus musculus	acylglycerol kinase(Agk)
ENSMUSG00000030849	FGFR2	Mus musculus	fibroblast growth factor receptor 2(Fgfr2)
ENSMUSG00000031592	PCM1	Mus musculus	pericentriolar material 1(Pcm1)
ENSMUSG00000036241	UBE2R2	Mus musculus	ubiquitin-conjugating enzyme E2R 2(Ube2r2)
ENSMUSG00000026116	TMEM131	Mus musculus	transmembrane protein 131(Tmem131)
ENSMUSG00000037876	JMJD1C	Mus musculus	jumonji domain containing 1C(Jmjd1c)
ENSMUSG00000035778	GGTA1	Mus musculus	glycoprotein galactosyltransferase alpha 1, 3(Ggta1)
ENSMUSG00000037369	KDM6A	Mus musculus	lysine (K)-specific demethylase 6A(Kdm6a)
ENSMUSG00000040640	ERC2	Mus musculus	ELKS/RAB6-interacting/CAST family member 2(Erc2)
ENSMUSG00000023036	PCDHGC4	Mus musculus	protocadherin gamma subfamily C, 4(Pcdhgc4)
ENSMUSG00000038172	TTC39B	Mus musculus	tetratricopeptide repeat domain 39B(Ttc39b)
ENSMUSG00000055254	NTRK2	Mus musculus	neurotrophic tyrosine kinase, receptor, type 2(Ntrk2)
ENSMUSG00000040548	TEX2	Mus musculus	testis expressed gene 2(Tex2)
ENSMUSG00000053617	SH3PXD2A	Mus musculus	SH3 and PX domains 2A(Sh3pxd2a)
ENSMUSG00000011256	ADAM19	Mus musculus	a disintegrin and metallopeptidase domain 19 (meltrin beta)(Adam19)
ENSMUSG00000018378	CUEDC1	Mus musculus	CUE domain containing 1(Cuedc1)
ENSMUSG00000000088	Cox5a	Mus musculus	cytochrome c oxidase subunit Va(Cox5a)
ENSMUSG00000027593	RALY	Mus musculus	hnRNP-associated with lethal yellow(Raly)
ENSMUSG00000027596	A	Mus musculus	nonagouti(a)
ENSMUSG00000073633	FBXO36	Mus musculus	F-box protein 36(Fbxo36)
ENSMUSG00000038366	LASP1	Mus musculus	LIM and SH3 protein 1(Lasp1)
ENSMUSG00000000325	arvcf	Mus musculus	armadillo repeat gene deleted in velo-cardio-facial syndrome(Arvcf)
ENSMUSG00000037217	SYN1	Mus musculus	synapsin I(Syn1)
ENSMUSG00000018651	TADA2A	Mus musculus	transcriptional adaptor 2A(Tada2a)
ENSMUSG00000037742	EEF1A1	Mus musculus	eukaryotic translation elongation factor 1 alpha 1(Eef1a1)
ENSMUSG00000021745	PTPRG	Mus musculus	protein tyrosine phosphatase, receptor type, G(Ptprg)
ENSMUSG00000055067	SMYD3	Mus musculus	SET and MYND domain containing 3(Smyd3)
ENSMUSG00000030852	TACC2	Mus musculus	transforming, acidic coiled-coil containing protein 2(Tacc2)
ENSMUSG00000027947	il6ra	Mus musculus	interleukin 6 receptor, alpha(Il6ra)
ENSMUSG00000031561	TENM3	Mus musculus	teneurin transmembrane protein 3(Tenm3)
ENSMUSG00000018974	SART3	Mus musculus	squamous cell carcinoma antigen recognized by T cells 3(Sart3)
ENSMUSG00000022312	EIF3H	Mus musculus	eukaryotic translation initiation factor 3, subunit H(Eif3h)
ENSMUSG00000038482	TFDP1	Mus musculus	transcription factor Dp 1(Tfdp1)
ENSMUSG00000026960	ARL6IP6	Mus musculus	ADP-ribosylation factor-like 6 interacting protein 6(Arl6ip6)
ENSMUSG00000103037	PCDHGB1	Mus musculus	protocadherin gamma subfamily B, 1(Pcdhgb1)
ENSMUSG00000027940	TPM3	Mus musculus	tropomyosin 3, gamma(Tpm3)
ENSMUSG00000025171	UBTD1	Mus musculus	ubiquitin domain containing 1(Ubtd1)
ENSMUSG00000037492	ZMAT4	Mus musculus	zinc finger, matrin type 4(Zmat4)
ENSMUSG00000009418	NAV1	Mus musculus	neuron navigator 1(Nav1)
ENSMUSG00000022419	DEPTOR	Mus musculus	DEP domain containing MTOR-interacting protein(Deptor)
ENSMUSG00000019907	PPP1R12A	Mus musculus	protein phosphatase 1, regulatory (inhibitor) subunit 12A(Ppp1r12a)
ENSMUSG00000039410	PRDM16	Mus musculus	PR domain containing 16(Prdm16)
ENSMUSG00000002825	QTRT1	Mus musculus	queuine tRNA-ribosyltransferase 1(Qtrt1)
ENSMUSG00000025980	HSPD1	Mus musculus	heat shock protein 1 (chaperonin)(Hspd1)
ENSMUSG00000023845	LNPEP	Mus musculus	leucyl/cystinyl aminopeptidase(Lnpep)
ENSMUSG00000102748	PCDHGB2	Mus musculus	protocadherin gamma subfamily B, 2(Pcdhgb2)
ENSMUSG00000010538	TSACC	Mus musculus	TSSK6 activating co-chaperone(Tsacc)
ENSMUSG00000042507	ELMSAN1	Mus musculus	ELM2 and Myb/SANT-like domain containing 1(Elmsan1)
ENSMUSG00000023944	HSP90AB1	Mus musculus	heat shock protein 90 alpha (cytosolic), class B member 1(Hsp90ab1)
ENSMUSG00000087516	AW549542	Mus musculus	expressed sequence AW549542(AW549542)
ENSMUSG00000006705	PKNOX1	Mus musculus	Pbx/knotted 1 homeobox(Pknox1)
ENSMUSG00000022812	GSK3B	Mus musculus	glycogen synthase kinase 3 beta(Gsk3b)
ENSMUSG00000040669	PHC1	Mus musculus	polyhomeotic-like 1 (Drosophila)(Phc1)
ENSMUSG00000102805	arfip1	Mus musculus	ADP-ribosylation factor interacting protein 1(Arfip1)
ENSMUSG00000029207	APBB2	Mus musculus	amyloid beta (A4) precursor protein-binding, family B, member 2(Apbb2)
ENSMUSG00000029203	UBE2K	Mus musculus	ubiquitin-conjugating enzyme E2K(Ube2k)
ENSMUSG00000038058	NOD1	Mus musculus	nucleotide-binding oligomerization domain containing 1(Nod1)
ENSMUSG00000038056	KMT2C	Mus musculus	lysine (K)-specific methyltransferase 2C(Kmt2c)
ENSMUSG00000029202	PDS5A	Mus musculus	PDS5 cohesin associated factor A(Pds5a)
ENSMUSG00000025950	idh1	Mus musculus	isocitrate dehydrogenase 1 (NADP+), soluble(Idh1)
ENSMUSG00000018849	WWC1	Mus musculus	WW, C2 and coiled-coil domain containing 1(Wwc1)
ENSMUSG00000102742	PCDHGA11	Mus musculus	protocadherin gamma subfamily A, 11(Pcdhga11)
ENSMUSG00000020954	STRN3	Mus musculus	striatin, calmodulin binding protein 3(Strn3)
ENSMUSG00000026566	MPZL1	Mus musculus	myelin protein zero-like 1(Mpzl1)
ENSMUSG00000026565	POU2F1	Mus musculus	POU domain, class 2, transcription factor 1(Pou2f1)
ENSMUSG00000000441	RAF1	Mus musculus	v-raf-leukemia viral oncogene 1(Raf1)
ENSMUSG00000021036	SPTLC2	Mus musculus	serine palmitoyltransferase, long chain base subunit 2(Sptlc2)
ENSMUSG00000018678	SP2	Mus musculus	Sp2 transcription factor(Sp2)
ENSMUSG00000029478	NCOR2	Mus musculus	nuclear receptor co-repressor 2(Ncor2)
ENSMUSG00000020333	ACSL6	Mus musculus	acyl-CoA synthetase long-chain family member 6(Acsl6)
ENSMUSG00000045659	PLEKHA7	Mus musculus	pleckstrin homology domain containing, family A member 7(Plekha7)
ENSMUSG00000026987	BAZ2B	Mus musculus	bromodomain adjacent to zinc finger domain, 2B(Baz2b)
ENSMUSG00000084826	AI847159	Mus musculus	expressed sequence AI847159(AI847159)
ENSMUSG00000001228	UHRF1	Mus musculus	ubiquitin-like, containing PHD and RING finger domains, 1(Uhrf1)
ENSMUSG00000020745	PAFAH1B1	Mus musculus	platelet-activating factor acetylhydrolase, isoform 1b, subunit 1(Pafah1b1)
ENSMUSG00000008730	HIPK1	Mus musculus	homeodomain interacting protein kinase 1(Hipk1)
ENSMUSG00000026773	PFKFB3	Mus musculus	6-phosphofructo-2-kinase/fructose-2,6-biphosphatase 3(Pfkfb3)
ENSMUSG00000042751	NMNAT2	Mus musculus	nicotinamide nucleotide adenylyltransferase 2(Nmnat2)
ENSMUSG00000039671	ZMYND8	Mus musculus	zinc finger, MYND-type containing 8(Zmynd8)
ENSMUSG00000026883	DAB2IP	Mus musculus	disabled 2 interacting protein(Dab2ip)
ENSMUSG00000028488	SH3GL2	Mus musculus	SH3-domain GRB2-like 2(Sh3gl2)
ENSMUSG00000031489	ADRB3	Mus musculus	adrenergic receptor, beta 3(Adrb3)
ENSMUSG00000038143	STOX2	Mus musculus	storkhead box 2(Stox2)
ENSMUSG00000096768	Erdr1	Mus musculus	erythroid differentiation regulator 1(Erdr1)
ENSMUSG00000026479	LAMC2	Mus musculus	laminin, gamma 2(Lamc2)
ENSMUSG00000028483	SNAPC3	Mus musculus	small nuclear RNA activating complex, polypeptide 3(Snapc3)
ENSMUSG00000037622	WDTC1	Mus musculus	WD and tetratricopeptide repeats 1(Wdtc1)
ENSMUSG00000000244	TSPAN32	Mus musculus	tetraspanin 32(Tspan32)
ENSMUSG00000028487	BNC2	Mus musculus	basonuclin 2(Bnc2)
ENSMUSG00000020182	DDC	Mus musculus	dopa decarboxylase(Ddc)
ENSMUSG00000020042	BTBD11	Mus musculus	BTB (POZ) domain containing 11(Btbd11)
ENSMUSG00000034135	SIK3	Mus musculus	SIK family kinase 3(Sik3)
ENSMUSG00000045098	KMT5B	Mus musculus	lysine methyltransferase 5B(Kmt5b)
ENSMUSG00000099988	1700054A03Rik	Mus musculus	RIKEN cDNA 1700054A03 gene(1700054A03Rik)
ENSMUSG00000028333	ANP32B	Mus musculus	acidic (leucine-rich) nuclear phosphoprotein 32 family, member B(Anp32b)
ENSMUSG00000026219	TRIP12	Mus musculus	thyroid hormone receptor interactor 12(Trip12)
ENSMUSG00000030602	PAK4	Mus musculus	p21 protein (Cdc42/Rac)-activated kinase 4(Pak4)
ENSMUSG00000061731	EXT1	Mus musculus	exostoses (multiple) 1(Ext1)
ENSMUSG00000036585	FGF1	Mus musculus	fibroblast growth factor 1(Fgf1)
ENSMUSG00000084950	Gm5577	Mus musculus	predicted gene 5577(Gm5577)
ENSMUSG00000026356	DARS	Mus musculus	aspartyl-tRNA synthetase(Dars)
ENSMUSG00000064105	CNNM2	Mus musculus	cyclin M2(Cnnm2)
ENSMUSG00000073678	PGAP1	Mus musculus	post-GPI attachment to proteins 1(Pgap1)
ENSMUSG00000020451	LIMK2	Mus musculus	LIM motif-containing protein kinase 2(Limk2)
ENSMUSG00000025903	LYPLA1	Mus musculus	lysophospholipase 1(Lypla1)
ENSMUSG00000020453	PATZ1	Mus musculus	POZ (BTB) and AT hook containing zinc finger 1(Patz1)
ENSMUSG00000055027	SMYD1	Mus musculus	SET and MYND domain containing 1(Smyd1)
ENSMUSG00000029359	TESC	Mus musculus	tescalcin(Tesc)
ENSMUSG00000026796	FAM129B	Mus musculus	family with sequence similarity 129, member B(Fam129b)
ENSMUSG00000073676	hspe1	Mus musculus	heat shock protein 1 (chaperonin 10)(Hspe1)
ENSMUSG00000018411	MAPT	Mus musculus	microtubule-associated protein tau(Mapt)
ENSMUSG00000061130	PPM1B	Mus musculus	protein phosphatase 1B, magnesium dependent, beta isoform(Ppm1b)
ENSMUSG00000053198	PRX	Mus musculus	periaxin(Prx)
ENSMUSG00000036452	Gm5820	Mus musculus	predicted gene 5820(Gm5820)
ENSMUSG00000020458	RTN4	Mus musculus	reticulon 4(Rtn4)
ENSMUSG00000045671	SPRED2	Mus musculus	sprouty-related, EVH1 domain containing 2(Spred2)
ENSMUSG00000046873	YY2	Mus musculus	Yy2 transcription factor(Yy2)
ENSMUSG00000030619	EED	Mus musculus	embryonic ectoderm development(Eed)
ENSMUSG00000018412	KANSL1	Mus musculus	KAT8 regulatory NSL complex subunit 1(Kansl1)
ENSMUSG00000104063	PCDHGB7	Mus musculus	protocadherin gamma subfamily B, 7(Pcdhgb7)
ENSMUSG00000020717	PECAM1	Mus musculus	platelet/endothelial cell adhesion molecule 1(Pecam1)
ENSMUSG00000039542	NCAM1	Mus musculus	neural cell adhesion molecule 1(Ncam1)
ENSMUSG00000004637	WWOX	Mus musculus	WW domain-containing oxidoreductase(Wwox)
ENSMUSG00000026991	PKP4	Mus musculus	plakophilin 4(Pkp4)
ENSMUSG00000030102	ITPR1	Mus musculus	inositol 1,4,5-trisphosphate receptor 1(Itpr1)
ENSMUSG00000064351	COX1	Mus musculus	cytochrome c oxidase subunit I(COX1)
ENSMUSG00000061950	PPP4R1	Mus musculus	protein phosphatase 4, regulatory subunit 1(Ppp4r1)
ENSMUSG00000087455	5330411J11Rik	Mus musculus	RIKEN cDNA 5330411J11 gene(5330411J11Rik)
ENSMUSG00000026235	EPHA4	Mus musculus	Eph receptor A4(Epha4)
ENSMUSG00000026463	ATP2B4	Mus musculus	ATPase, Ca++ transporting, plasma membrane 4(Atp2b4)
ENSMUSG00000007379	DENND2C	Mus musculus	DENN/MADD domain containing 2C(Dennd2c)
ENSMUSG00000040624	PLEKHG1	Mus musculus	pleckstrin homology domain containing, family G (with RhoGef domain) member 1(Plekhg1)
ENSMUSG00000001415	SMG5	Mus musculus	Smg-5 homolog, nonsense mediated mRNA decay factor (C. elegans)(Smg5)
ENSMUSG00000045867	CRADD	Mus musculus	CASP2 and RIPK1 domain containing adaptor with death domain(Cradd)
ENSMUSG00000034312	IQSEC1	Mus musculus	IQ motif and Sec7 domain 1(Iqsec1)
