# Supplementary material
Source: MDPI journal article supplement (https://www.mdpi.com/2076-3417/11/1/213)
Supplement: s1 [file s1 › pathway_details.xlsx]

## Sheet: Node details
AverageShortestPathLength	BetweennessCentrality	ClosenessCentrality	ClusteringCoefficient	commonName	Degree	Eccentricity	EdgeCount	Indegree	name	NeighborhoodConnectivity	NumberOfDirectedEdges	NumberOfUndirectedEdges	Outdegree	PartnerOfMultiEdgedNodePairs	Radiality	Stress	TopologicalCoefficient
1.84615	0.00757576	0.541667	0.2	ESR1	5	3	5	1	ESR1	7.6	5	0	4	0	0.761364	5	0.435294
1	0.0606061	1	0.0972222	TP53	9	1	9	7	TP53	4.77778	9	0	2	0	0.829545	40	0.261438
1.57143	0.004329	0.636364	0.3	RELA	5	2	5	2	RELA	8.6	5	0	3	0	0.795455	4	0.409524
1	0.038961	1	0.144444	SMAD4	10	1	10	8	SMAD4	5.5	10	0	2	0	0.818182	20	0.317647
1.66667	0.00108225	0.6	0.4	NANOG	6	3	6	1	NANOG	7.16667	6	0	5	0	0.738636	1	0.477778
1.42857	0.0151515	0.7	0.238095	SALL4	7	2	7	3	SALL4	7	7	0	4	0	0.784091	10	0.388889
1.4	0.0606061	0.714286	0.118182	MYC	11	2	11	5	MYC	5	11	0	6	0	0.875	35	0.233766
1.66667	0.0183983	0.6	0.155556	STAT3	10	2	10	9	STAT3	6.1	10	0	1	0	0.852273	15	0.290476
0	0	0	0.45	SOX2	5	0	5	5	SOX2	6.8	5	0	0	0	0.693182	0	0.523077
0	0	0	0	TP63	1	0	1	1	TP63	9	1	0	0	0	0.590909	0	0
1.92857	0	0.518519	0.416667	E2F1	4	3	4	0	E2F1	8.75	4	0	4	0	0.761364	0	0.460526
1.90909	0	0.52381	0.5	AR	3	3	3	0	AR	8.66667	3	0	3	0	0.727273	0	0.509804
1.75	0.00108225	0.571429	0.4	POU5F1	6	3	6	2	POU5F1	7.16667	6	0	4	0	0.738636	1	0.477778
0	0	0	0	TCF3	2	0	2	2	TCF3	6.5	2	0	0	0	0.613636	0	0.55
2.08333	0	0.48	0.166667	CTCF	3	3	3	0	CTCF	7.33333	3	0	3	0	0.715909	0	0.466667
0	0	0	0	UBTF	1	0	1	1	UBTF	3	1	0	0	0	0.477273	0	0
1.66667	0	0.6	0	TAF1	1	2	1	0	TAF1	9	1	0	1	0	0.590909	0	0
0	0	0	0.5	ZBTB7A	2	0	2	2	ZBTB7A	7	2	0	0	0	0.659091	0	0.583333
0	0	0	0	YY1	1	0	1	1	YY1	9	1	0	0	0	0.590909	0	0
1.7	0	0.588235	0.4	KLF4	5	3	5	0	KLF4	7.4	5	0	5	0	0.715909	0	0.528571
2	0	0.5	0.166667	GATA2	3	3	3	0	GATA2	5	3	0	3	0	0.670455	0	0.424242
1.875	0.00649351	0.533333	0.166667	PPARG	3	3	3	1	PPARG	7	3	0	2	0	0.681818	5	0.512821
0	0	0	0	NFE2L2	1	0	1	1	NFE2L2	11	1	0	0	0	0.636364	0	0

## Sheet: Edge details
EdgeBetweenness	FI Annotation	FI Direction	FI Score	selected	shared name
3	activate	->	1	FALSE	RELA (FI) SMAD4
3	activate; complex; inhibited by; input	|->	1	FALSE	NANOG (FI) SALL4
5	expression regulated by	<-	1	FALSE	MYC (FI) RELA
1.5	reaction	-	1	FALSE	RELA (FI) STAT3
11.5	expression regulated by	<-	1	FALSE	STAT3 (FI) TP53
1	inhibite	-|	1	FALSE	E2F1 (FI) STAT3
3	reaction	-	1	FALSE	E2F1 (FI) TP53
1	expression regulates	->	1	FALSE	CTCF (FI) UBTF
3	catalyze; expression regulates	->	1	FALSE	TAF1 (FI) TP53
5	expression regulated by	<-	1	FALSE	MYC (FI) ZBTB7A
15	activated by; expression regulated by	<-	1	FALSE	TP53 (FI) YY1
1.5	complex; input	-	1	FALSE	KLF4 (FI) POU5F1
2	activated by; complex; inhibite; input	<-|	1	FALSE	SALL4 (FI) SOX2
1	expression regulated by	<-	1	FALSE	GATA2 (FI) ZBTB7A
7	activate; inhibited by	|->	1	FALSE	PPARG (FI) SALL4
4	reaction	-	1	FALSE	PPARG (FI) TP53
3	complex; expression regulated by; input	<-	1	FALSE	AR (FI) SMAD4
8.5	expression regulates	->	1	FALSE	CTCF (FI) MYC
2.5	expression regulates	->	1	FALSE	CTCF (FI) STAT3
3	activate; complex; inhibited by; input	|->	1	FALSE	POU5F1 (FI) SALL4
5.5	reaction	-	1	FALSE	E2F1 (FI) MYC
1	GErel: expression by; complex; input	<-	1	FALSE	NANOG (FI) SOX2
4	GErel: expression by	<-	1	FALSE	KLF4 (FI) STAT3
4.5	expression regulated by; expression regulates	<->	1	FALSE	RELA (FI) TP53
5	GErel: expression; complex; expression regulates; input	->	1	FALSE	ESR1 (FI) MYC
6	expression regulates	->	1	FALSE	MYC (FI) NFE2L2
1	GErel: expression; complex; expression regulates; input	->	1	FALSE	NANOG (FI) POU5F1
2	complex; input	-	1	FALSE	KLF4 (FI) SMAD4
2	complex; input	-	1	FALSE	POU5F1 (FI) SMAD4
15	activate; expression regulates; inhibited by	|->	1	FALSE	TP53 (FI) TP63
2	GErel: expression by	<-	1	FALSE	ESR1 (FI) STAT3
4.5	expression regulated by	<-	1	FALSE	E2F1 (FI) ESR1
4.5	activate; activated by; complex; input	<->	1	FALSE	ESR1 (FI) SMAD4
1.5	complex; input	-	1	FALSE	KLF4 (FI) NANOG
5	expression regulated by; expression regulates	<->	1	FALSE	ESR1 (FI) PPARG
2.5	PPrel: binding/association	-	1	FALSE	NANOG (FI) STAT3
8	complex; input	-	1	FALSE	SMAD4 (FI) SOX2
2	activated by; inhibite	<-|	1	FALSE	SALL4 (FI) STAT3
10	expression regulated by	<-	1	FALSE	MYC (FI) TP53
2	complex; input	-	1	FALSE	NANOG (FI) SMAD4
9	expression regulates	->	1	FALSE	GATA2 (FI) MYC
4	complex; input	-	1	FALSE	SALL4 (FI) SMAD4
1	GErel: expression; complex; input	->	1	FALSE	POU5F1 (FI) SOX2
3	expression regulated by	<-	1	FALSE	AR (FI) RELA
1	GErel: expression; complex; input	->	1	FALSE	KLF4 (FI) SOX2
5	expression regulates	->	1	FALSE	AR (FI) MYC
1	complex	-	1	FALSE	GATA2 (FI) TCF3
9.5	GErel: repressed by; activated by; complex; input; reaction	-	1	FALSE	MYC (FI) SMAD4
12	input	-	1	FALSE	SMAD4 (FI) TCF3
6	activated by; inhibite	<-|	1	FALSE	SALL4 (FI) TP53
2.5	complex; input	-	1	FALSE	POU5F1 (FI) STAT3
2.5	GErel: expression by; expression regulated by	<-	1	FALSE	MYC (FI) STAT3
